# Supplementary material for: Transcriptomic response to prolonged ethanol production in the cyanobacterium Synechocystis sp. PCC6803
Source: PubMed Central journal article supplement (PMC3925133; doi:10.1186/1754-6834-7-21), 2014-02-06

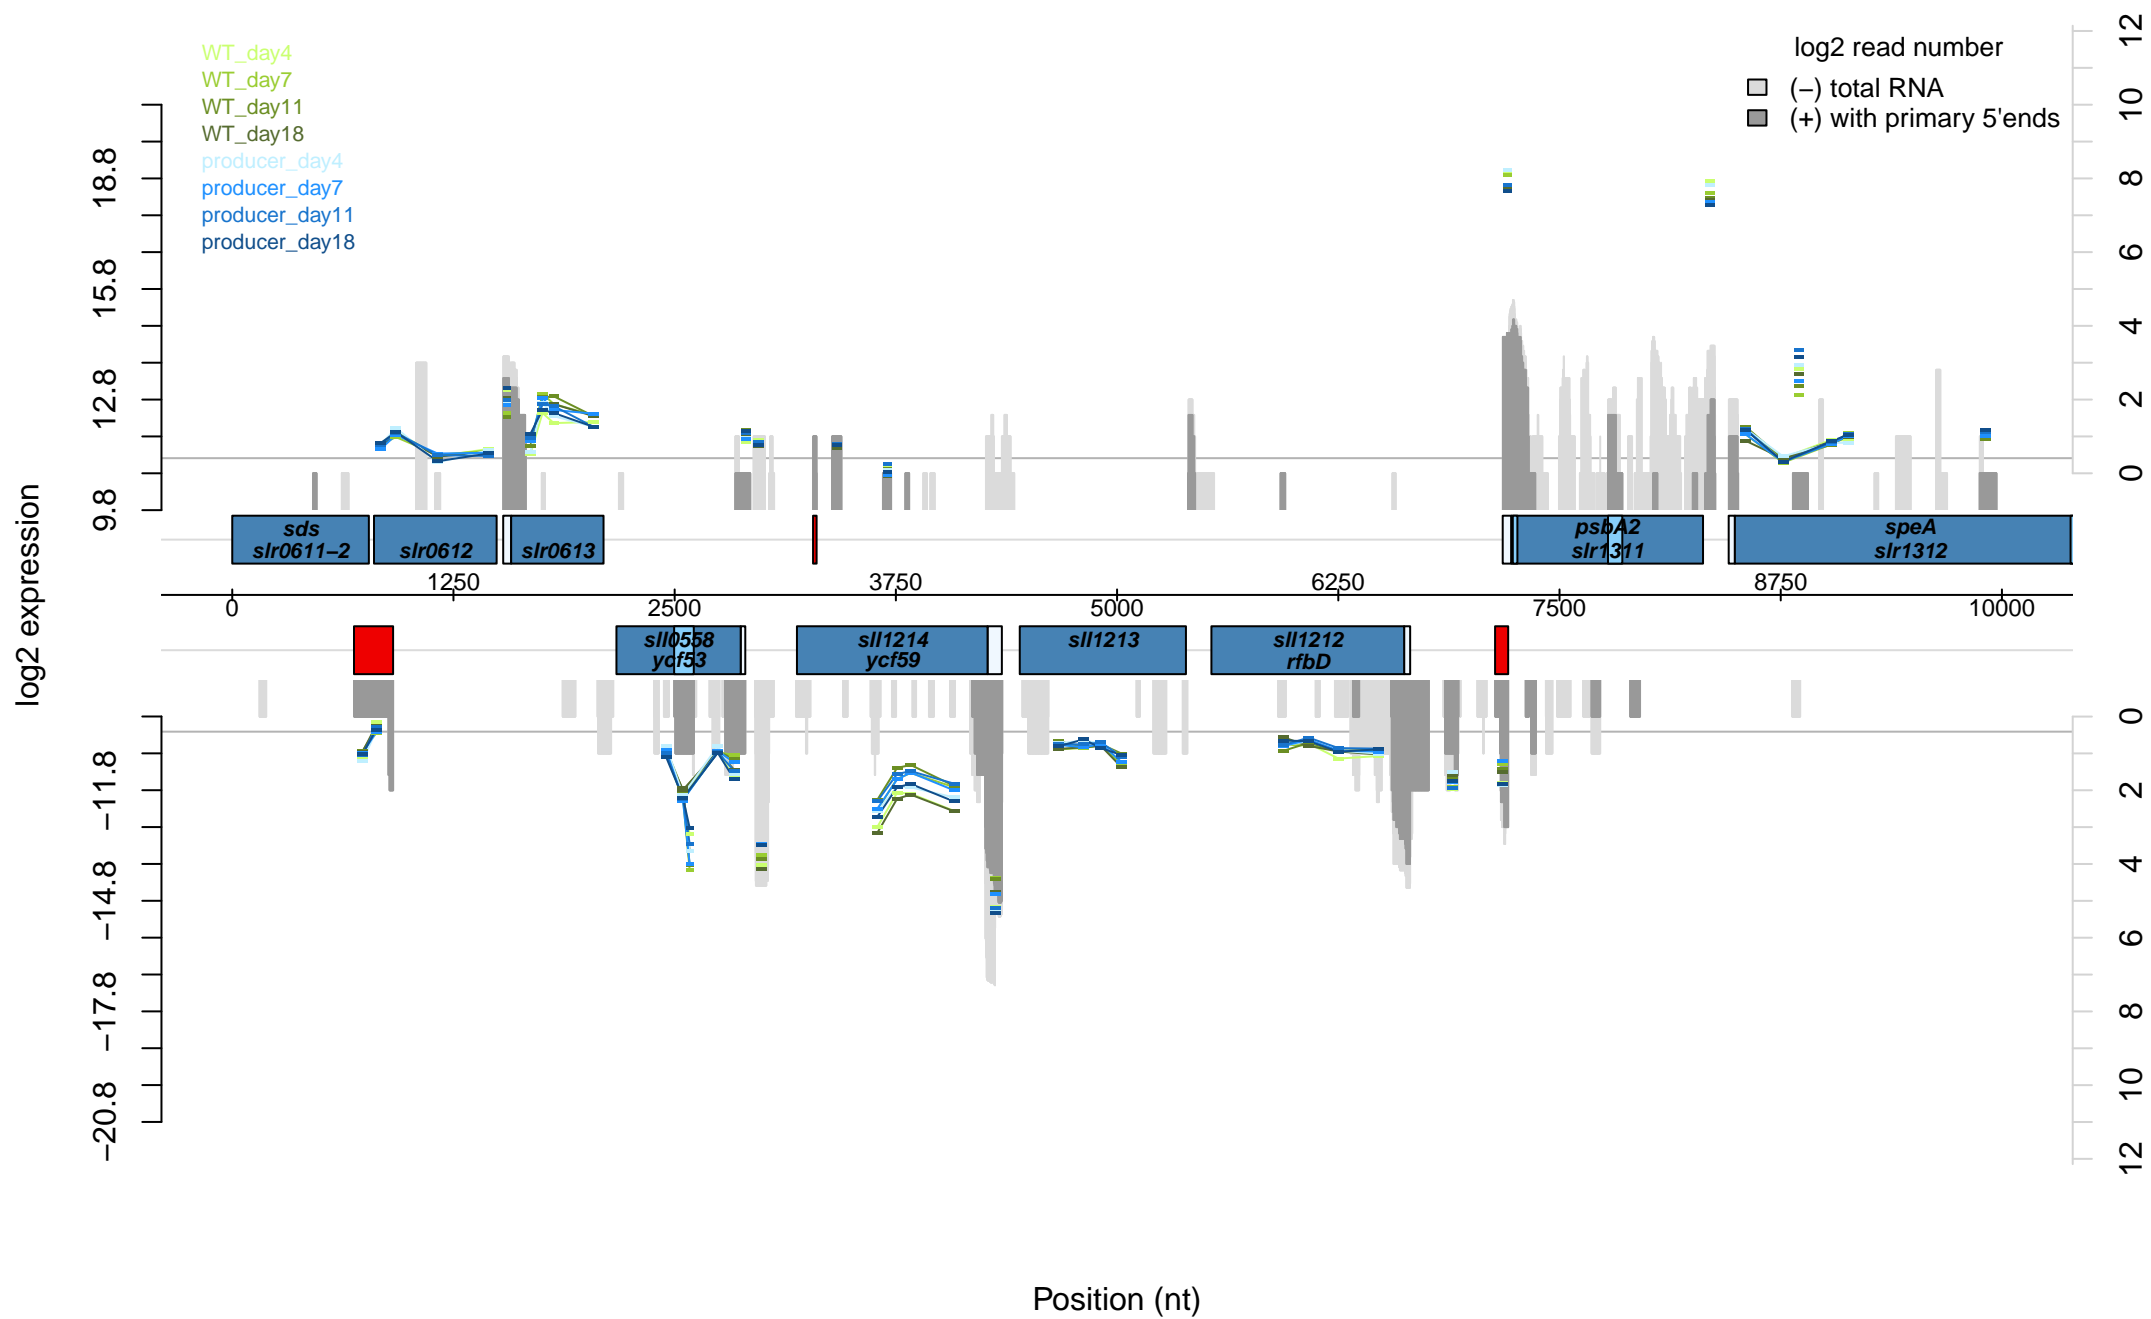

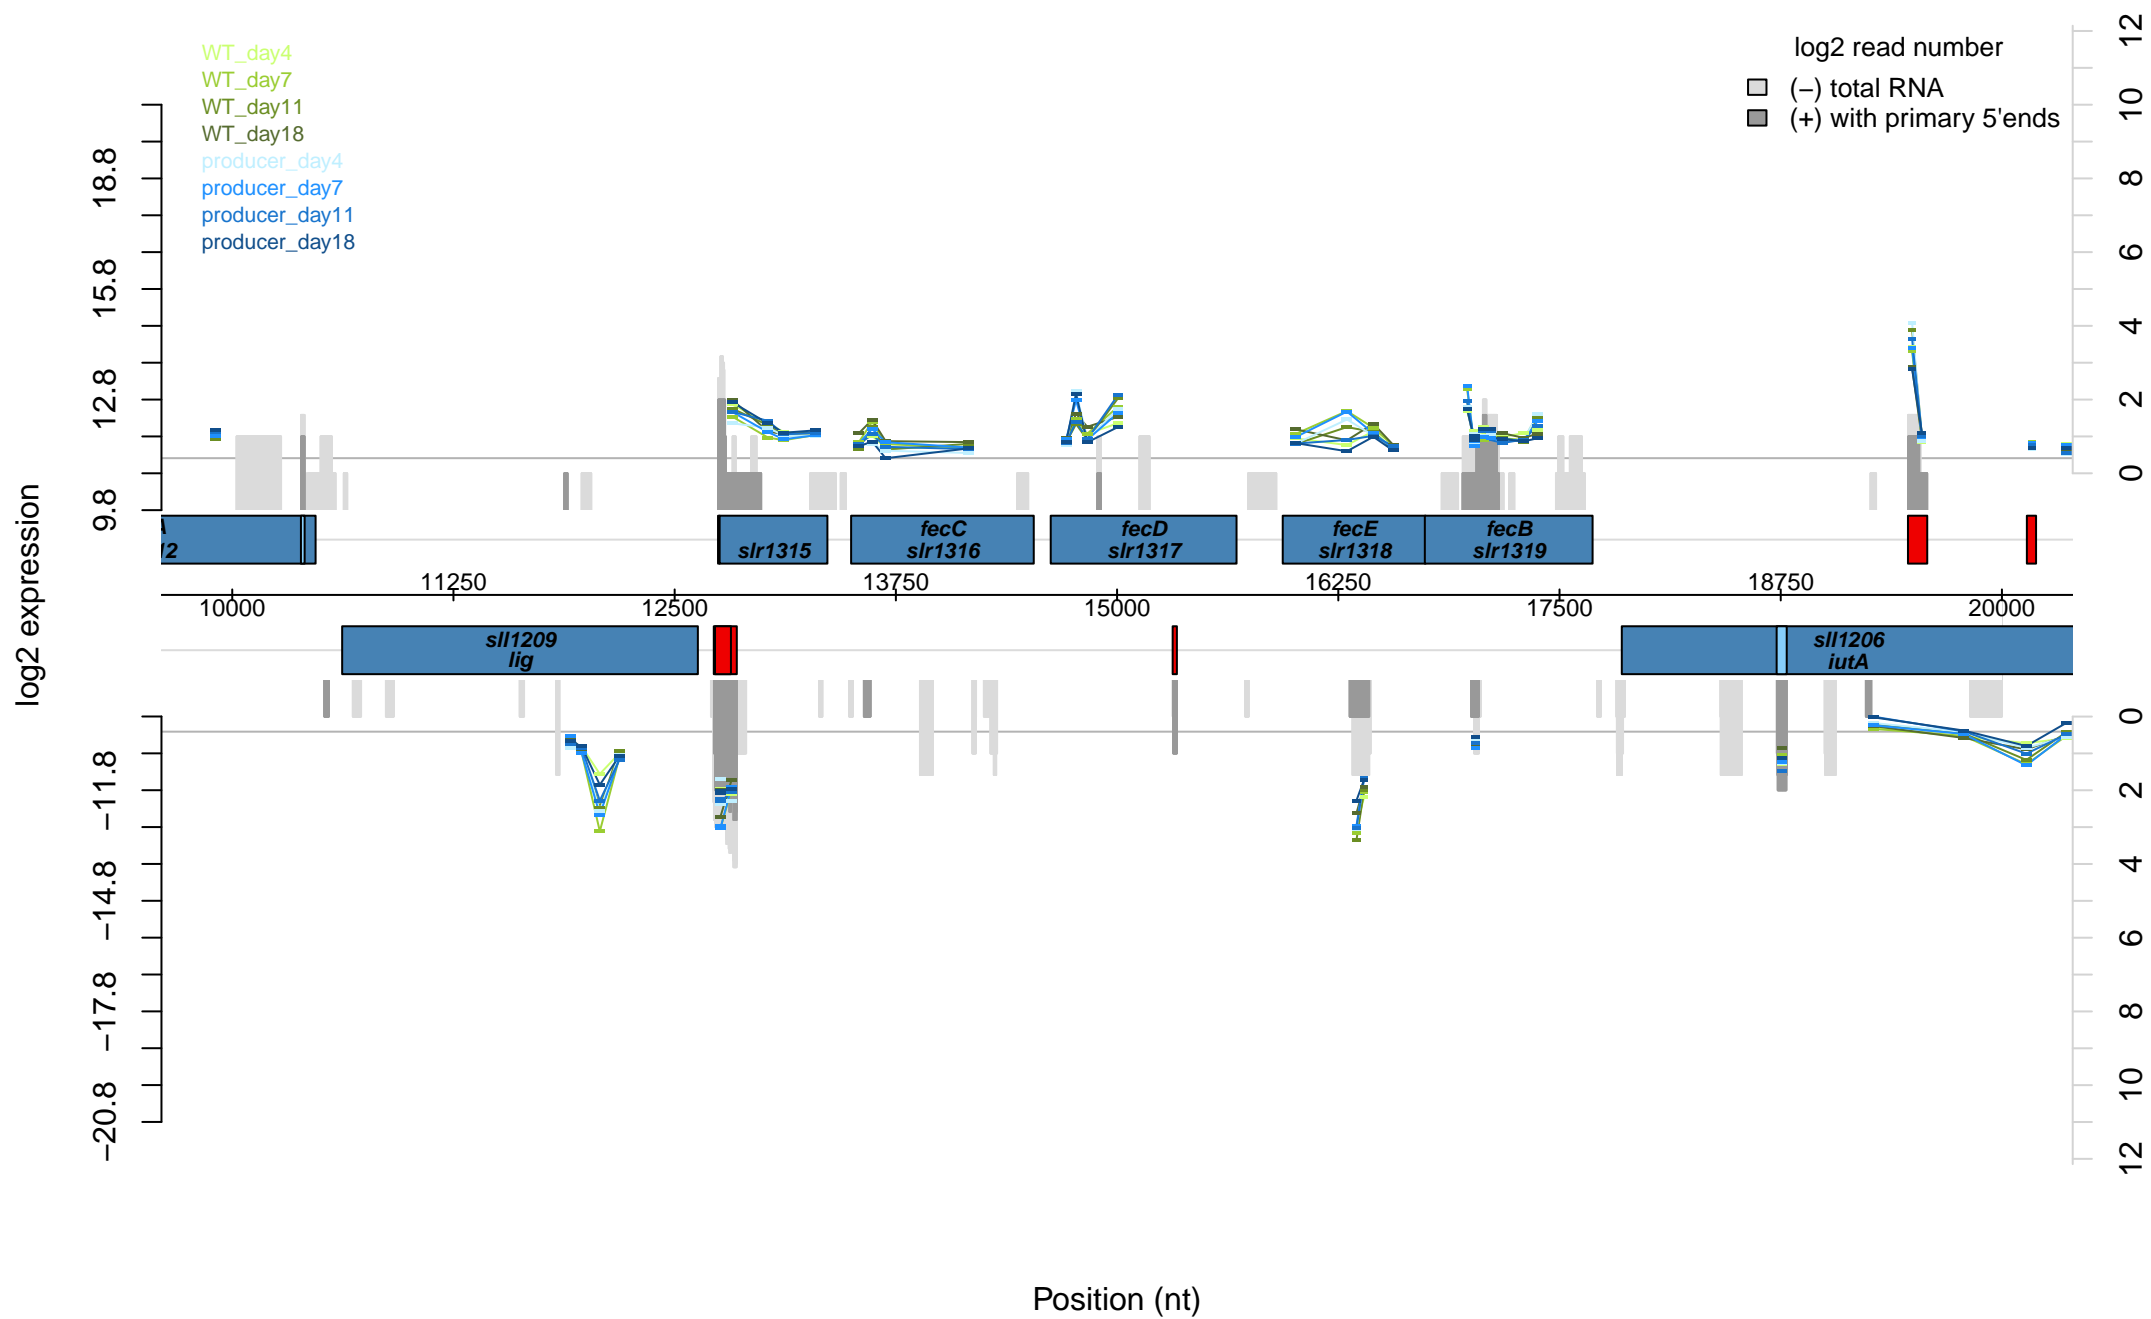

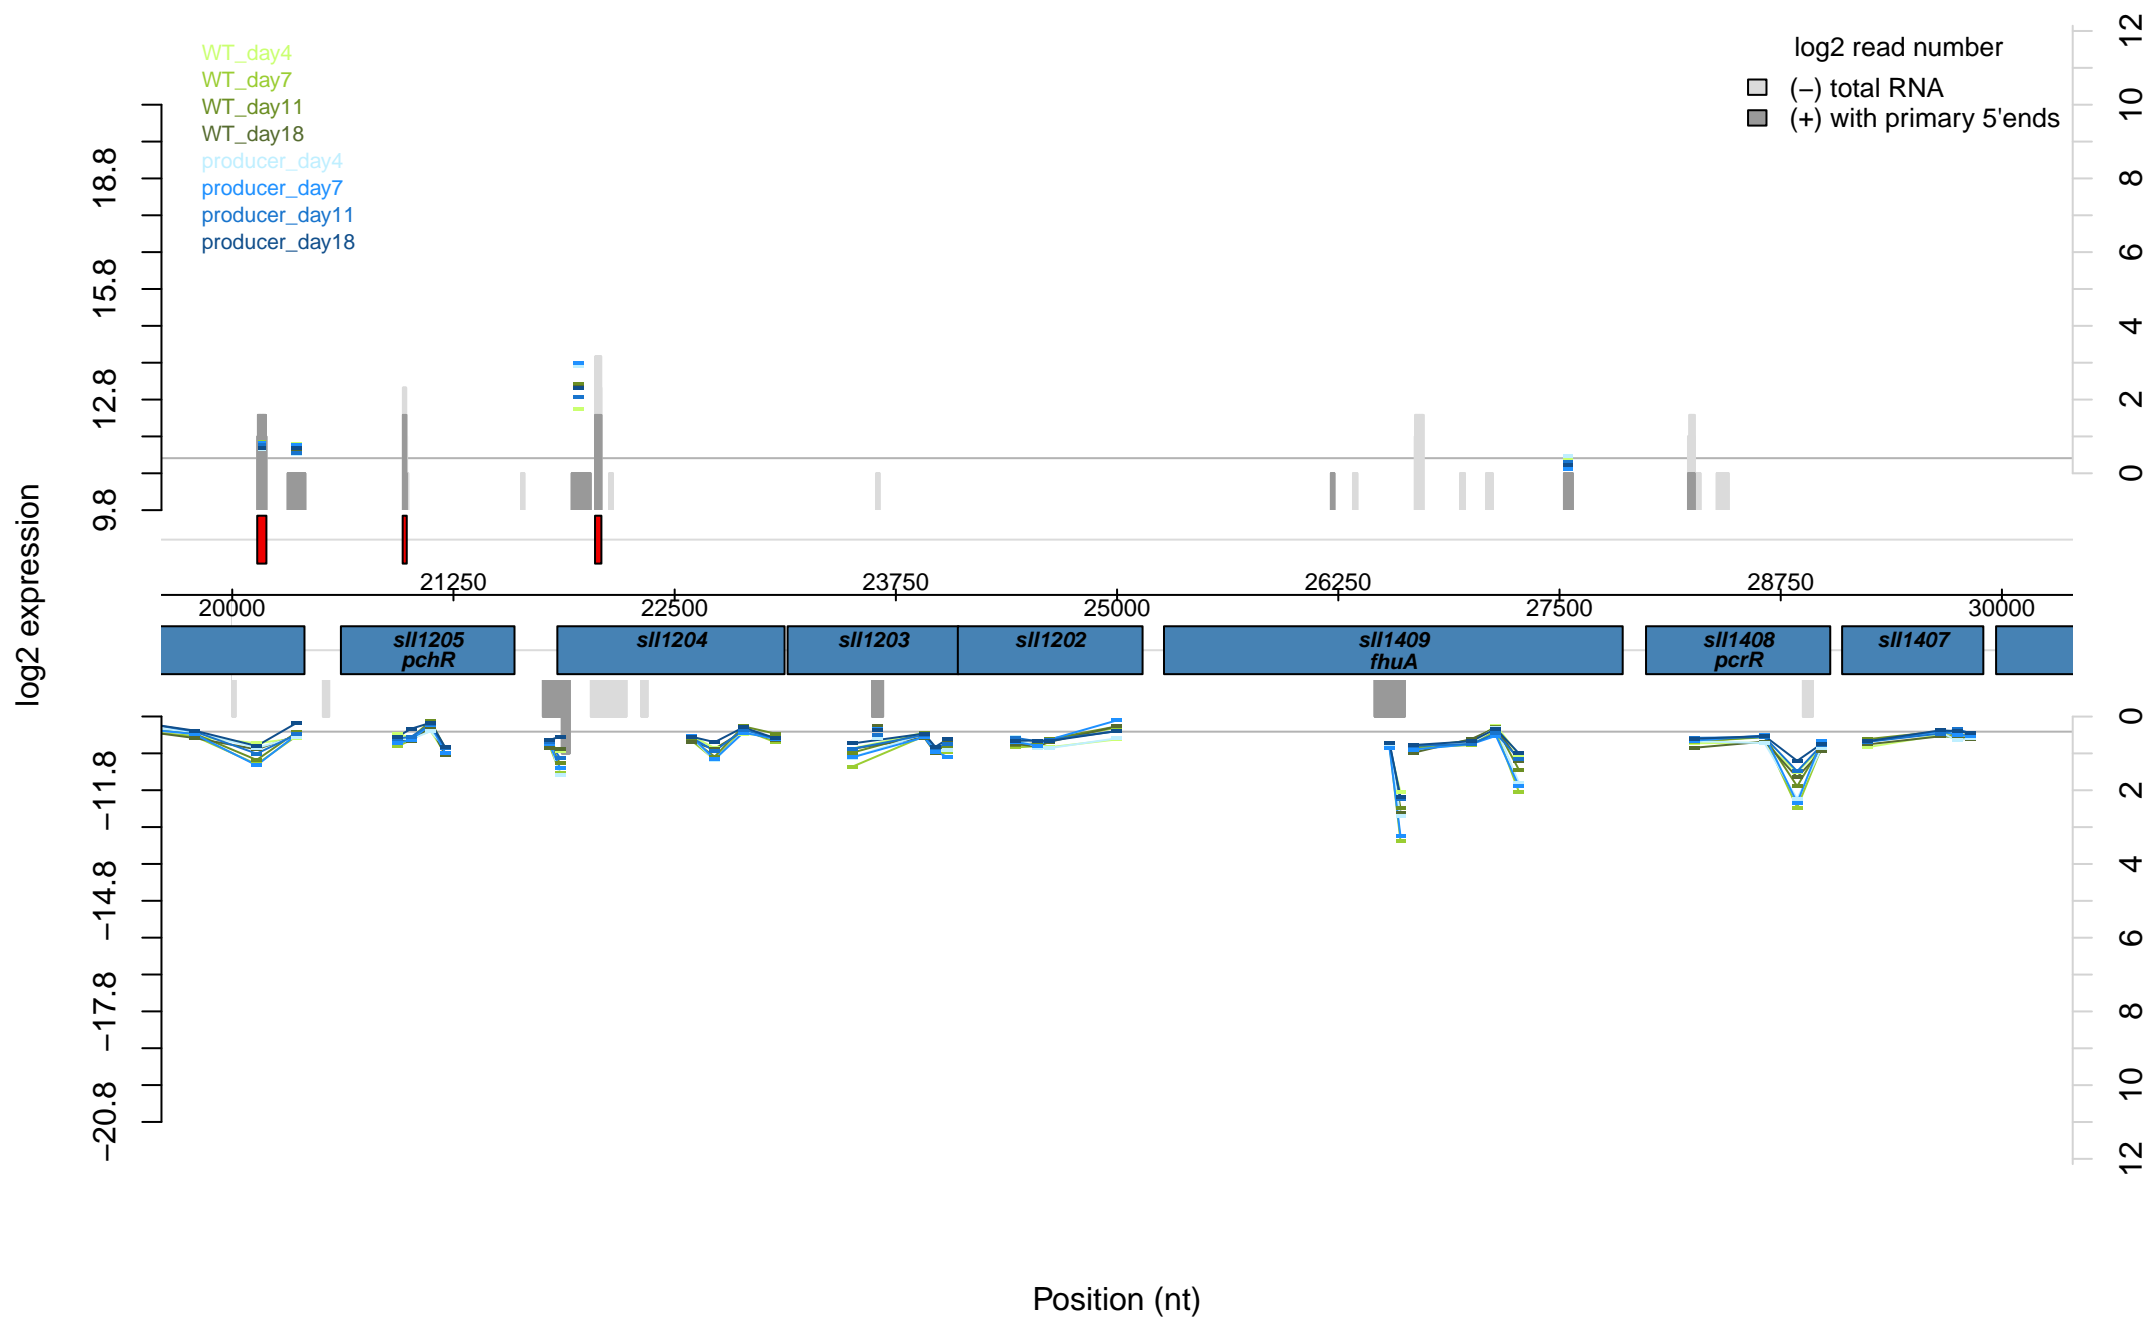

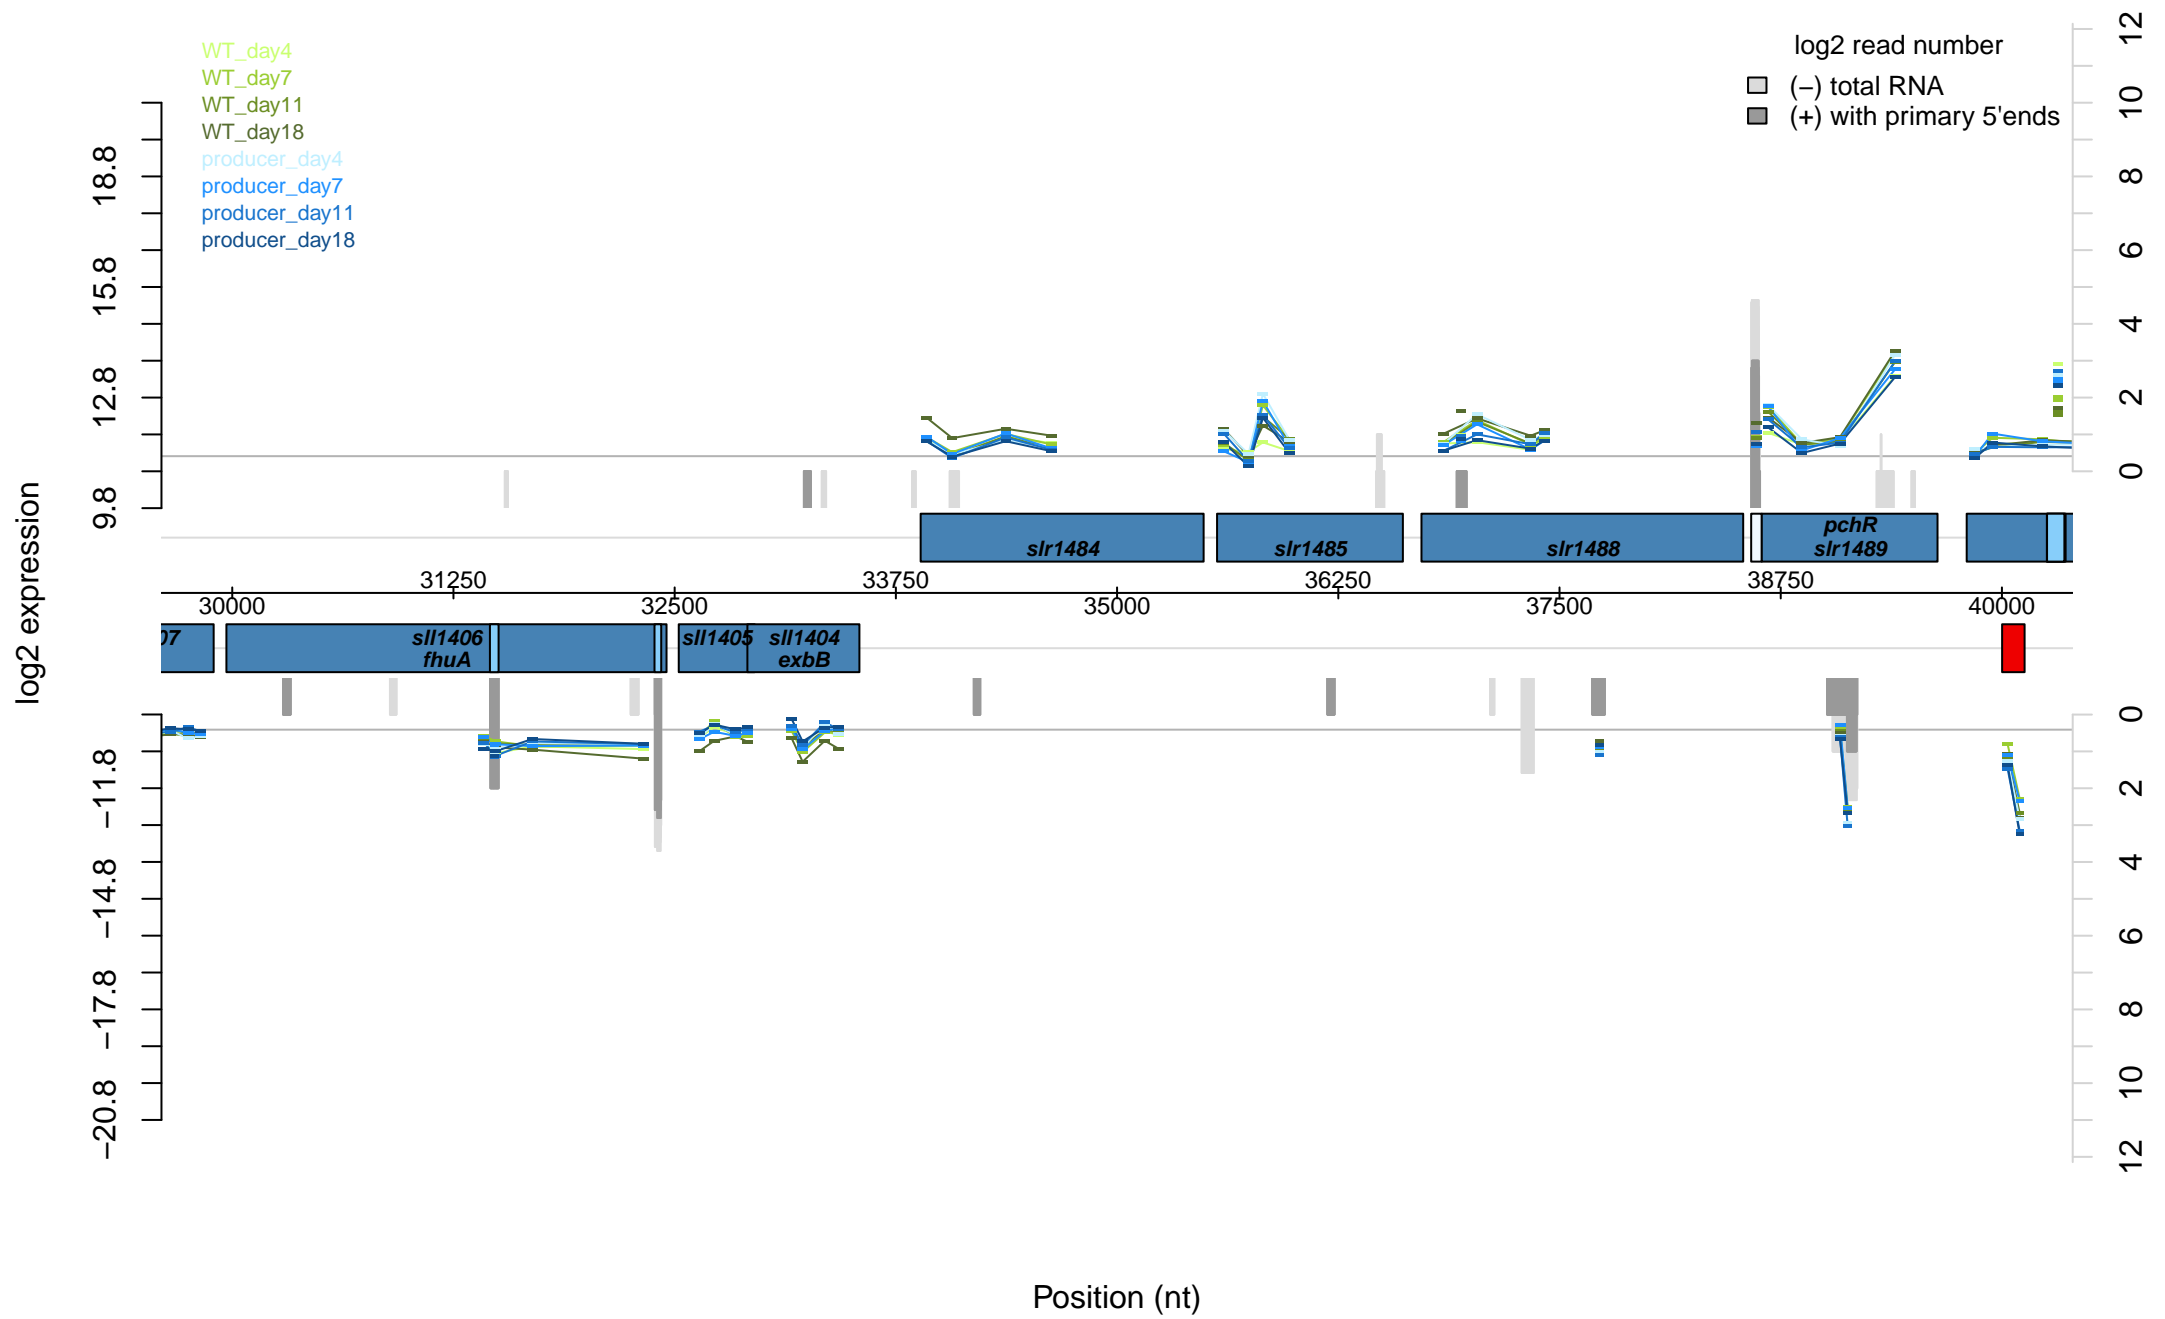



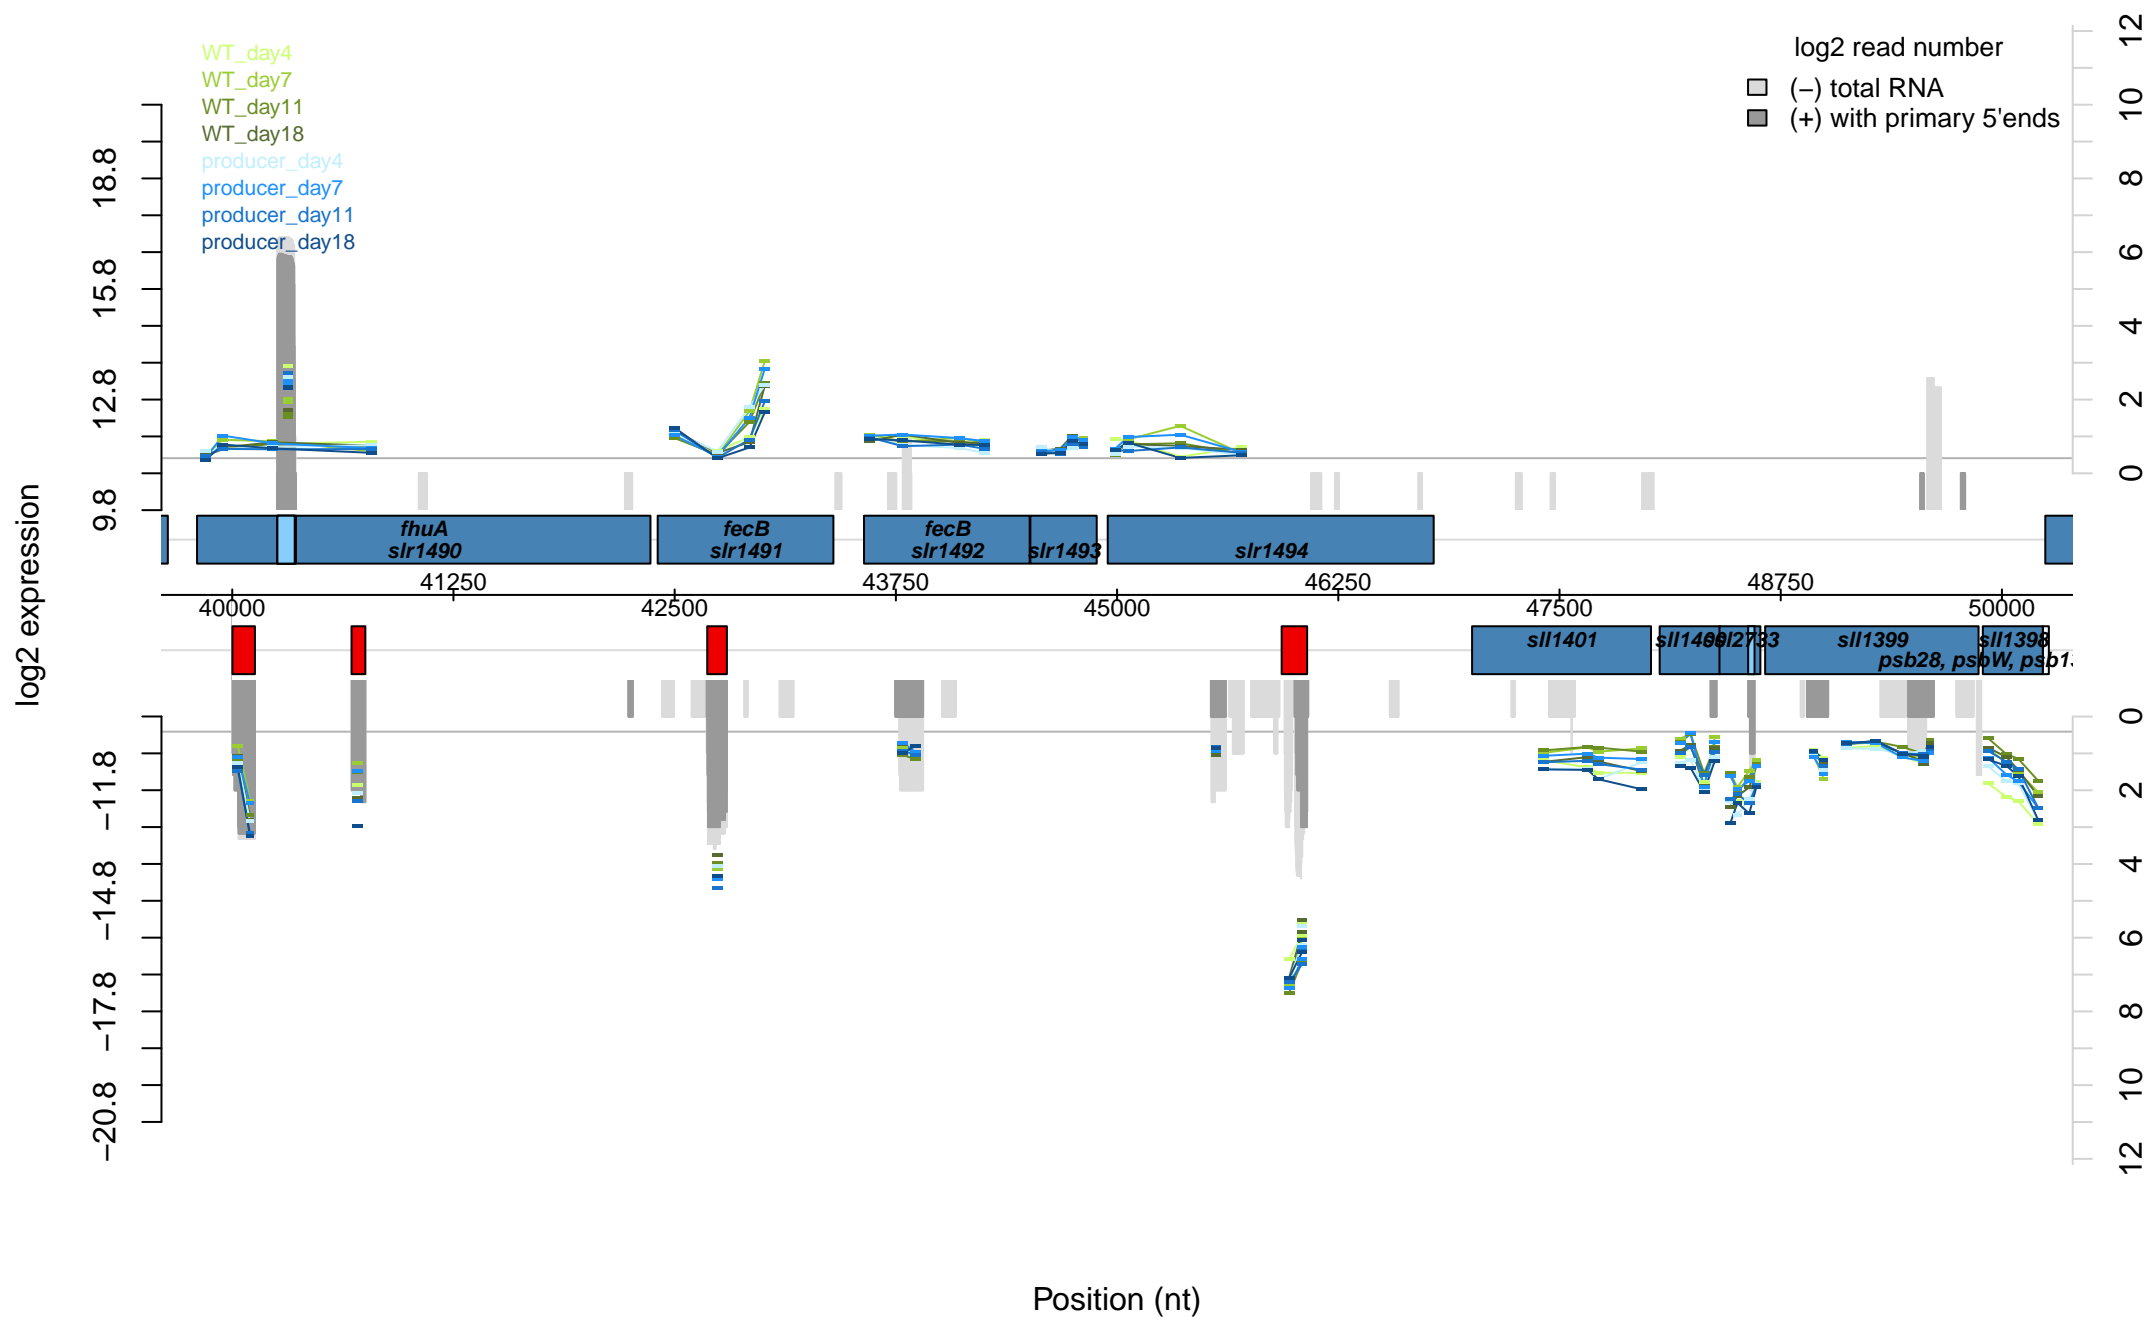

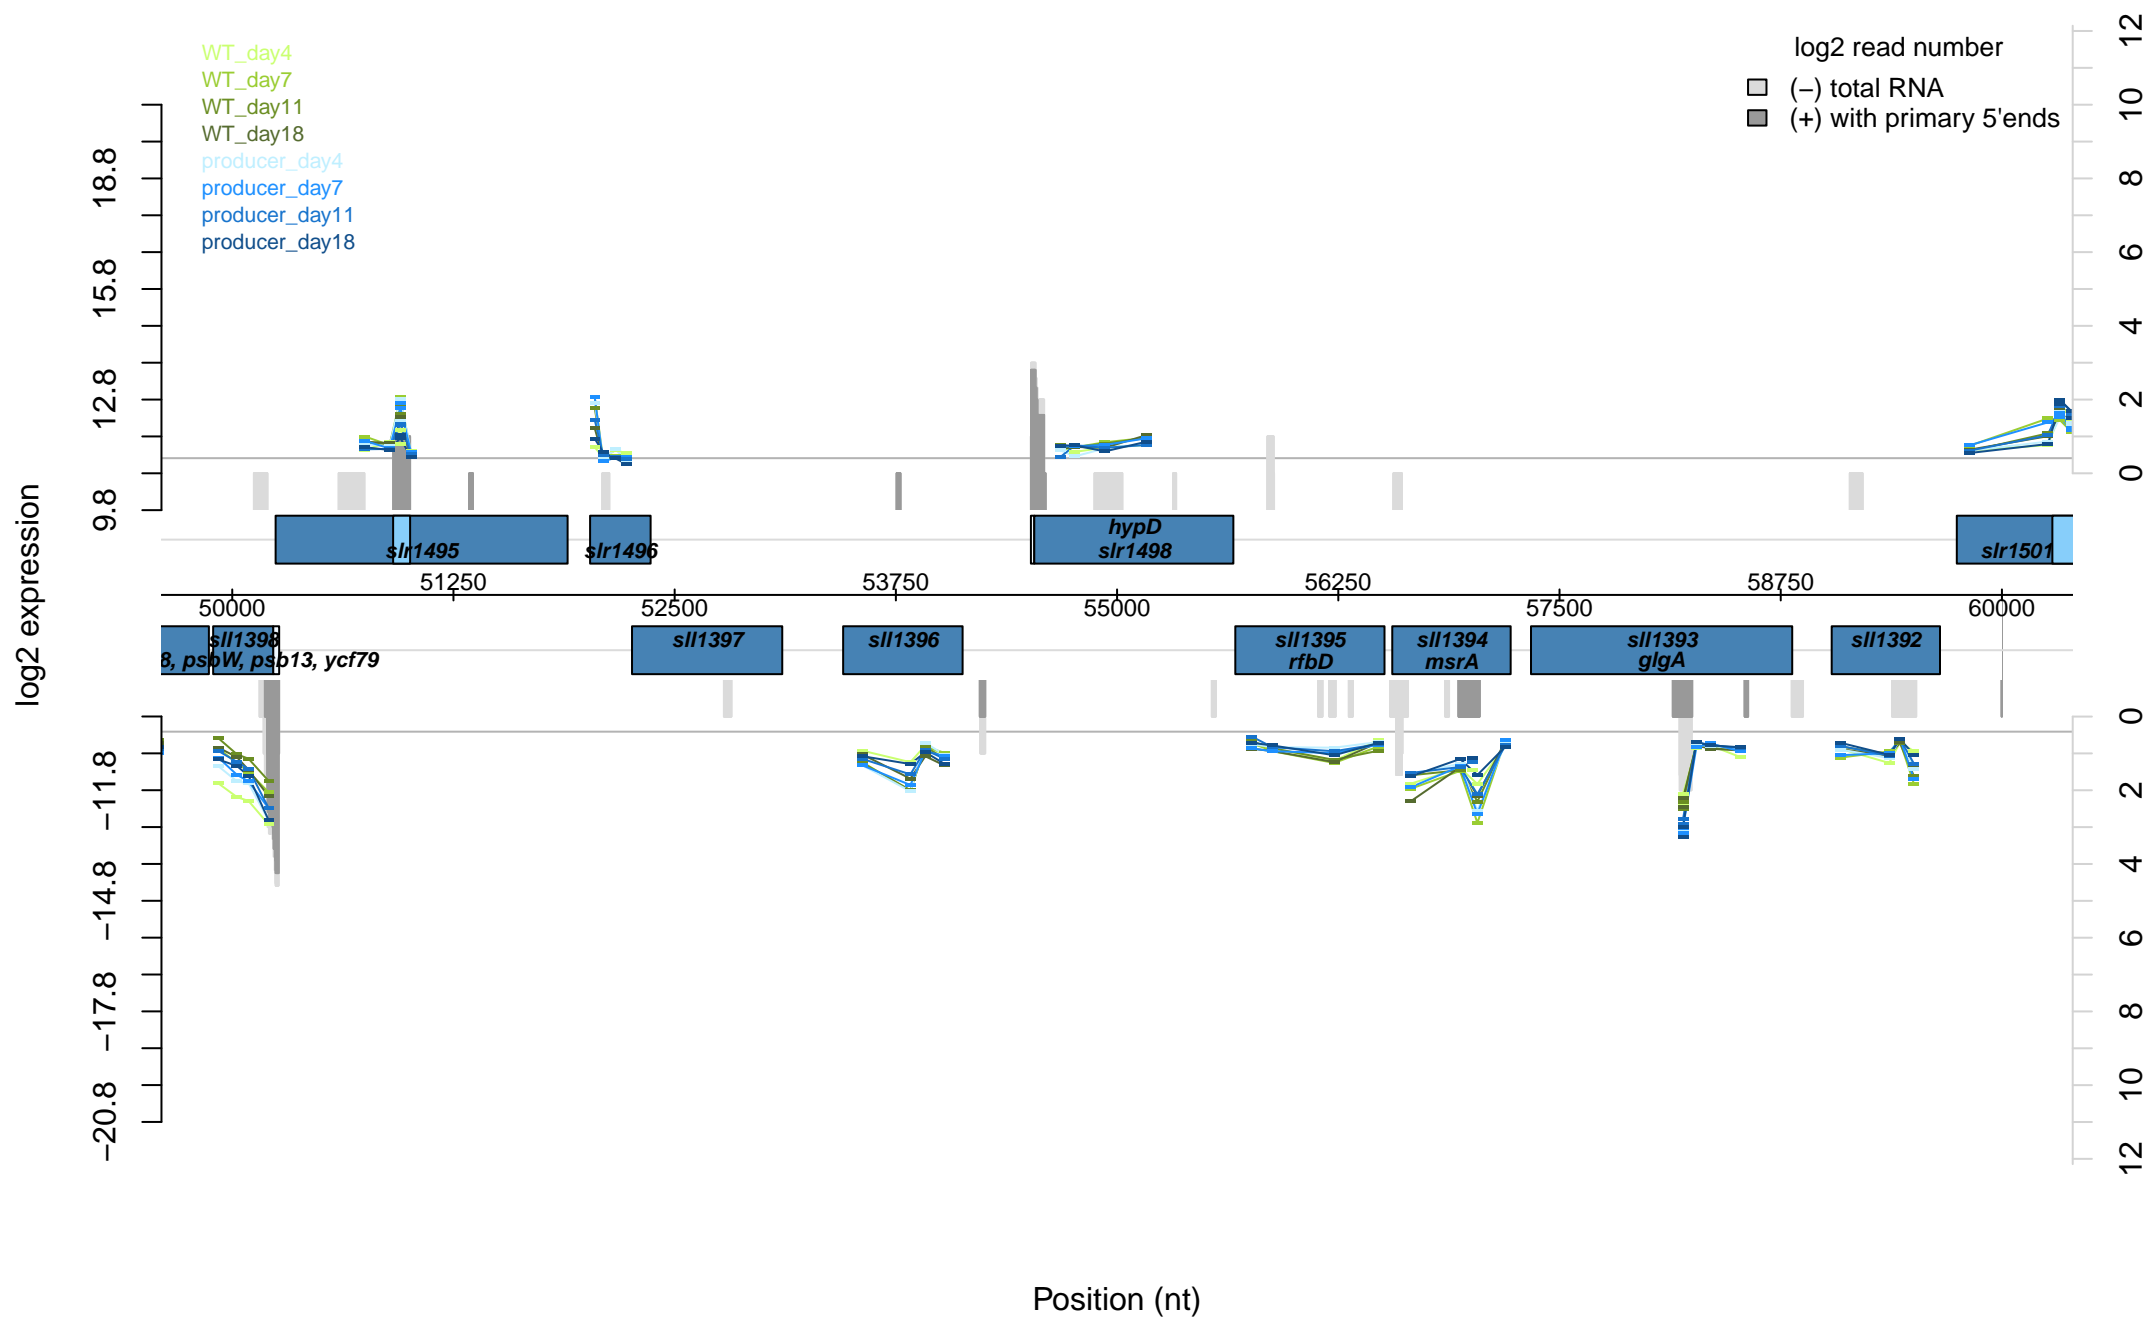

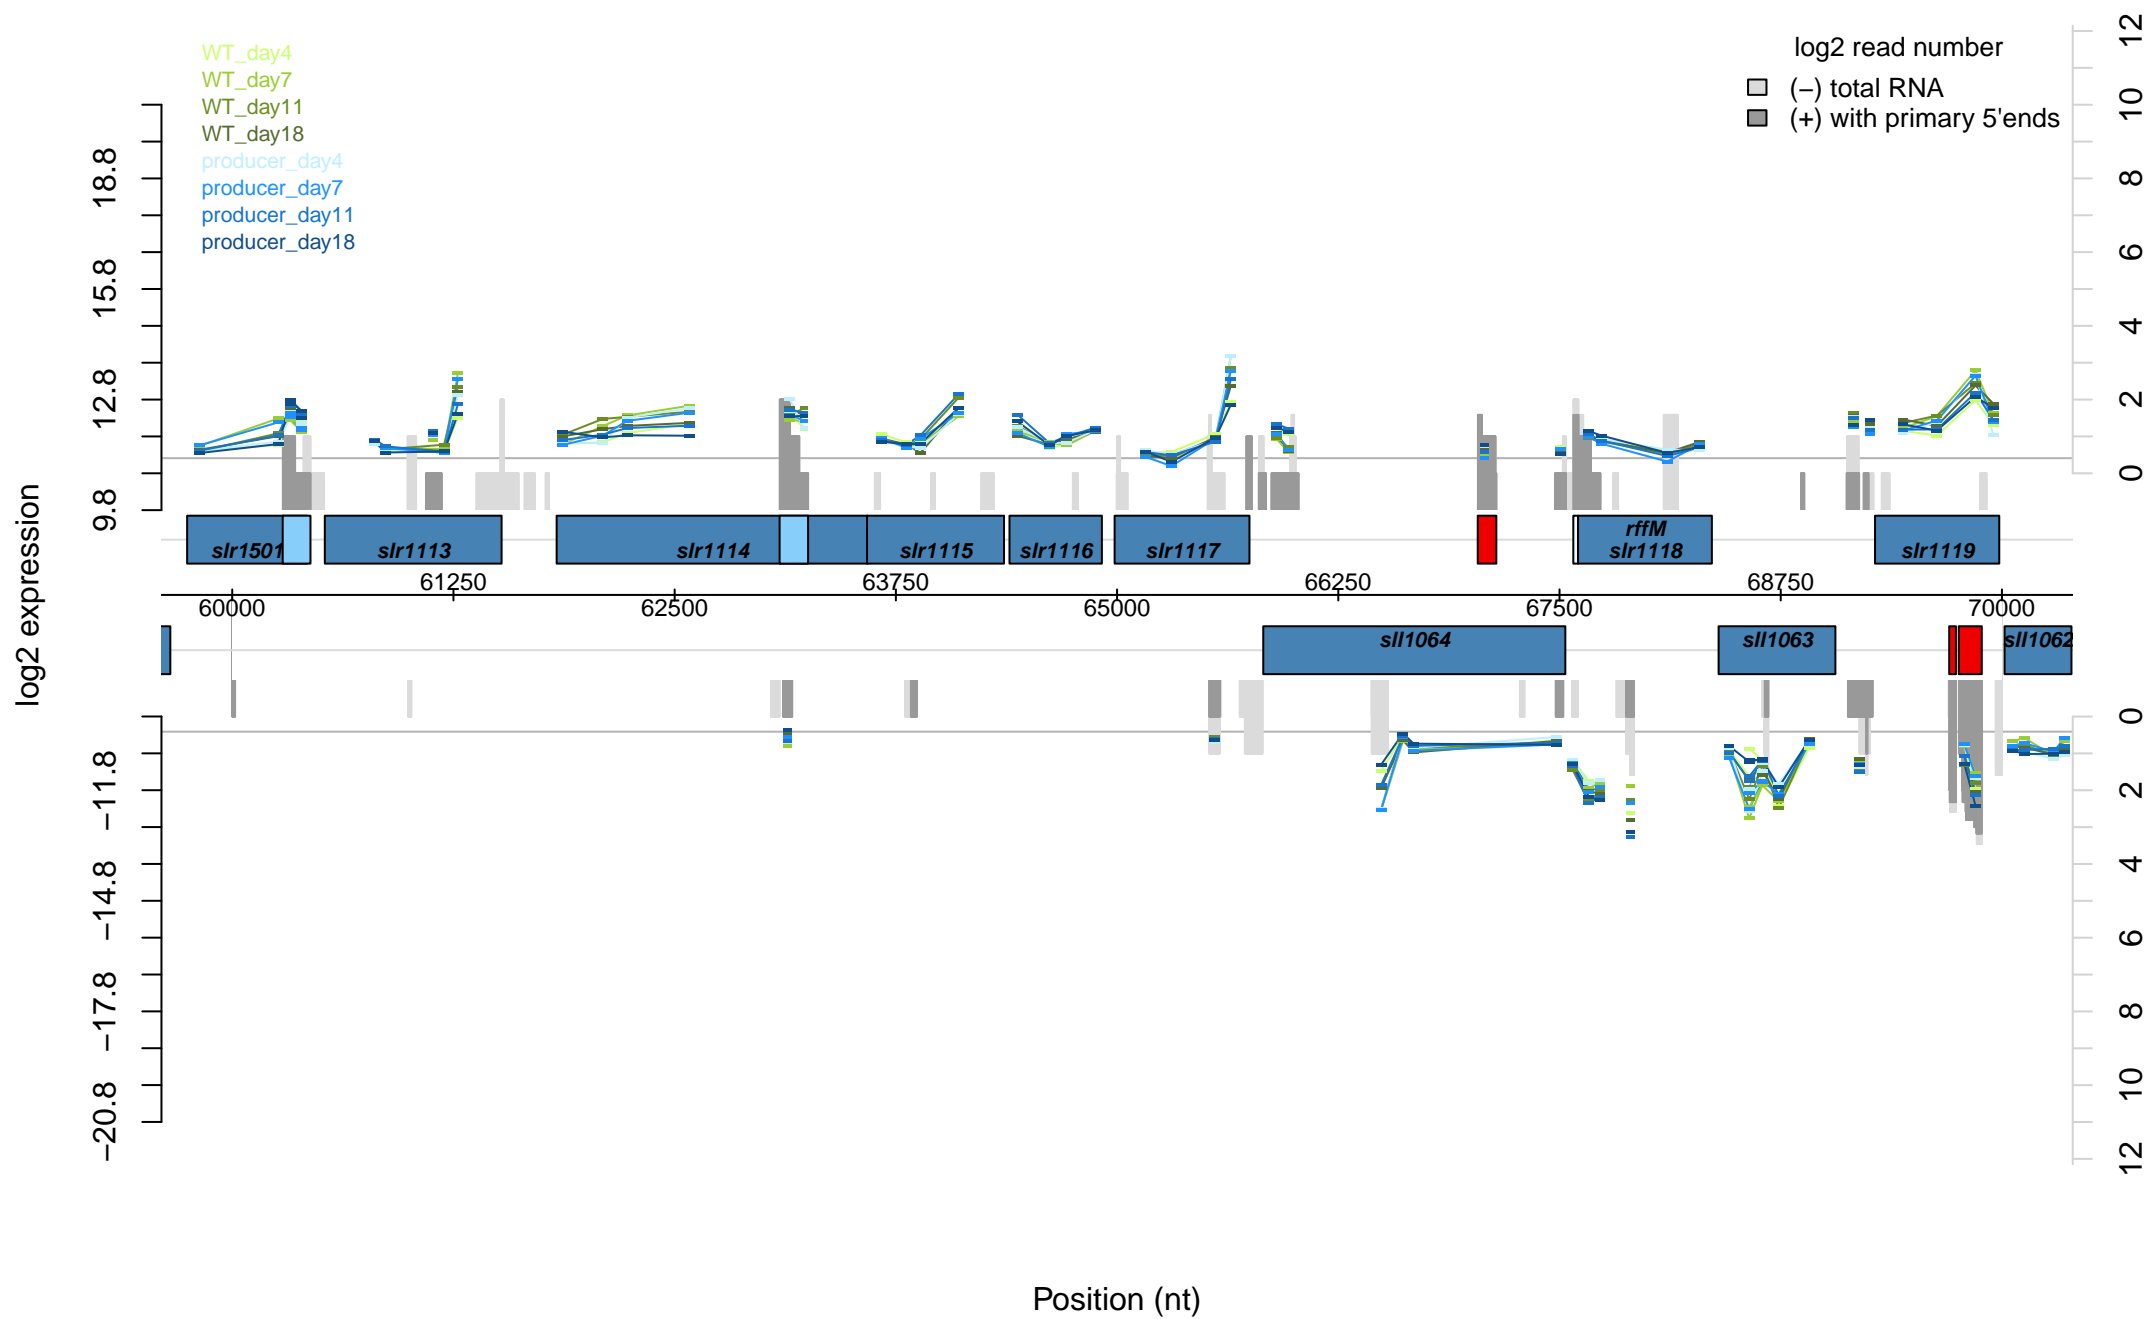

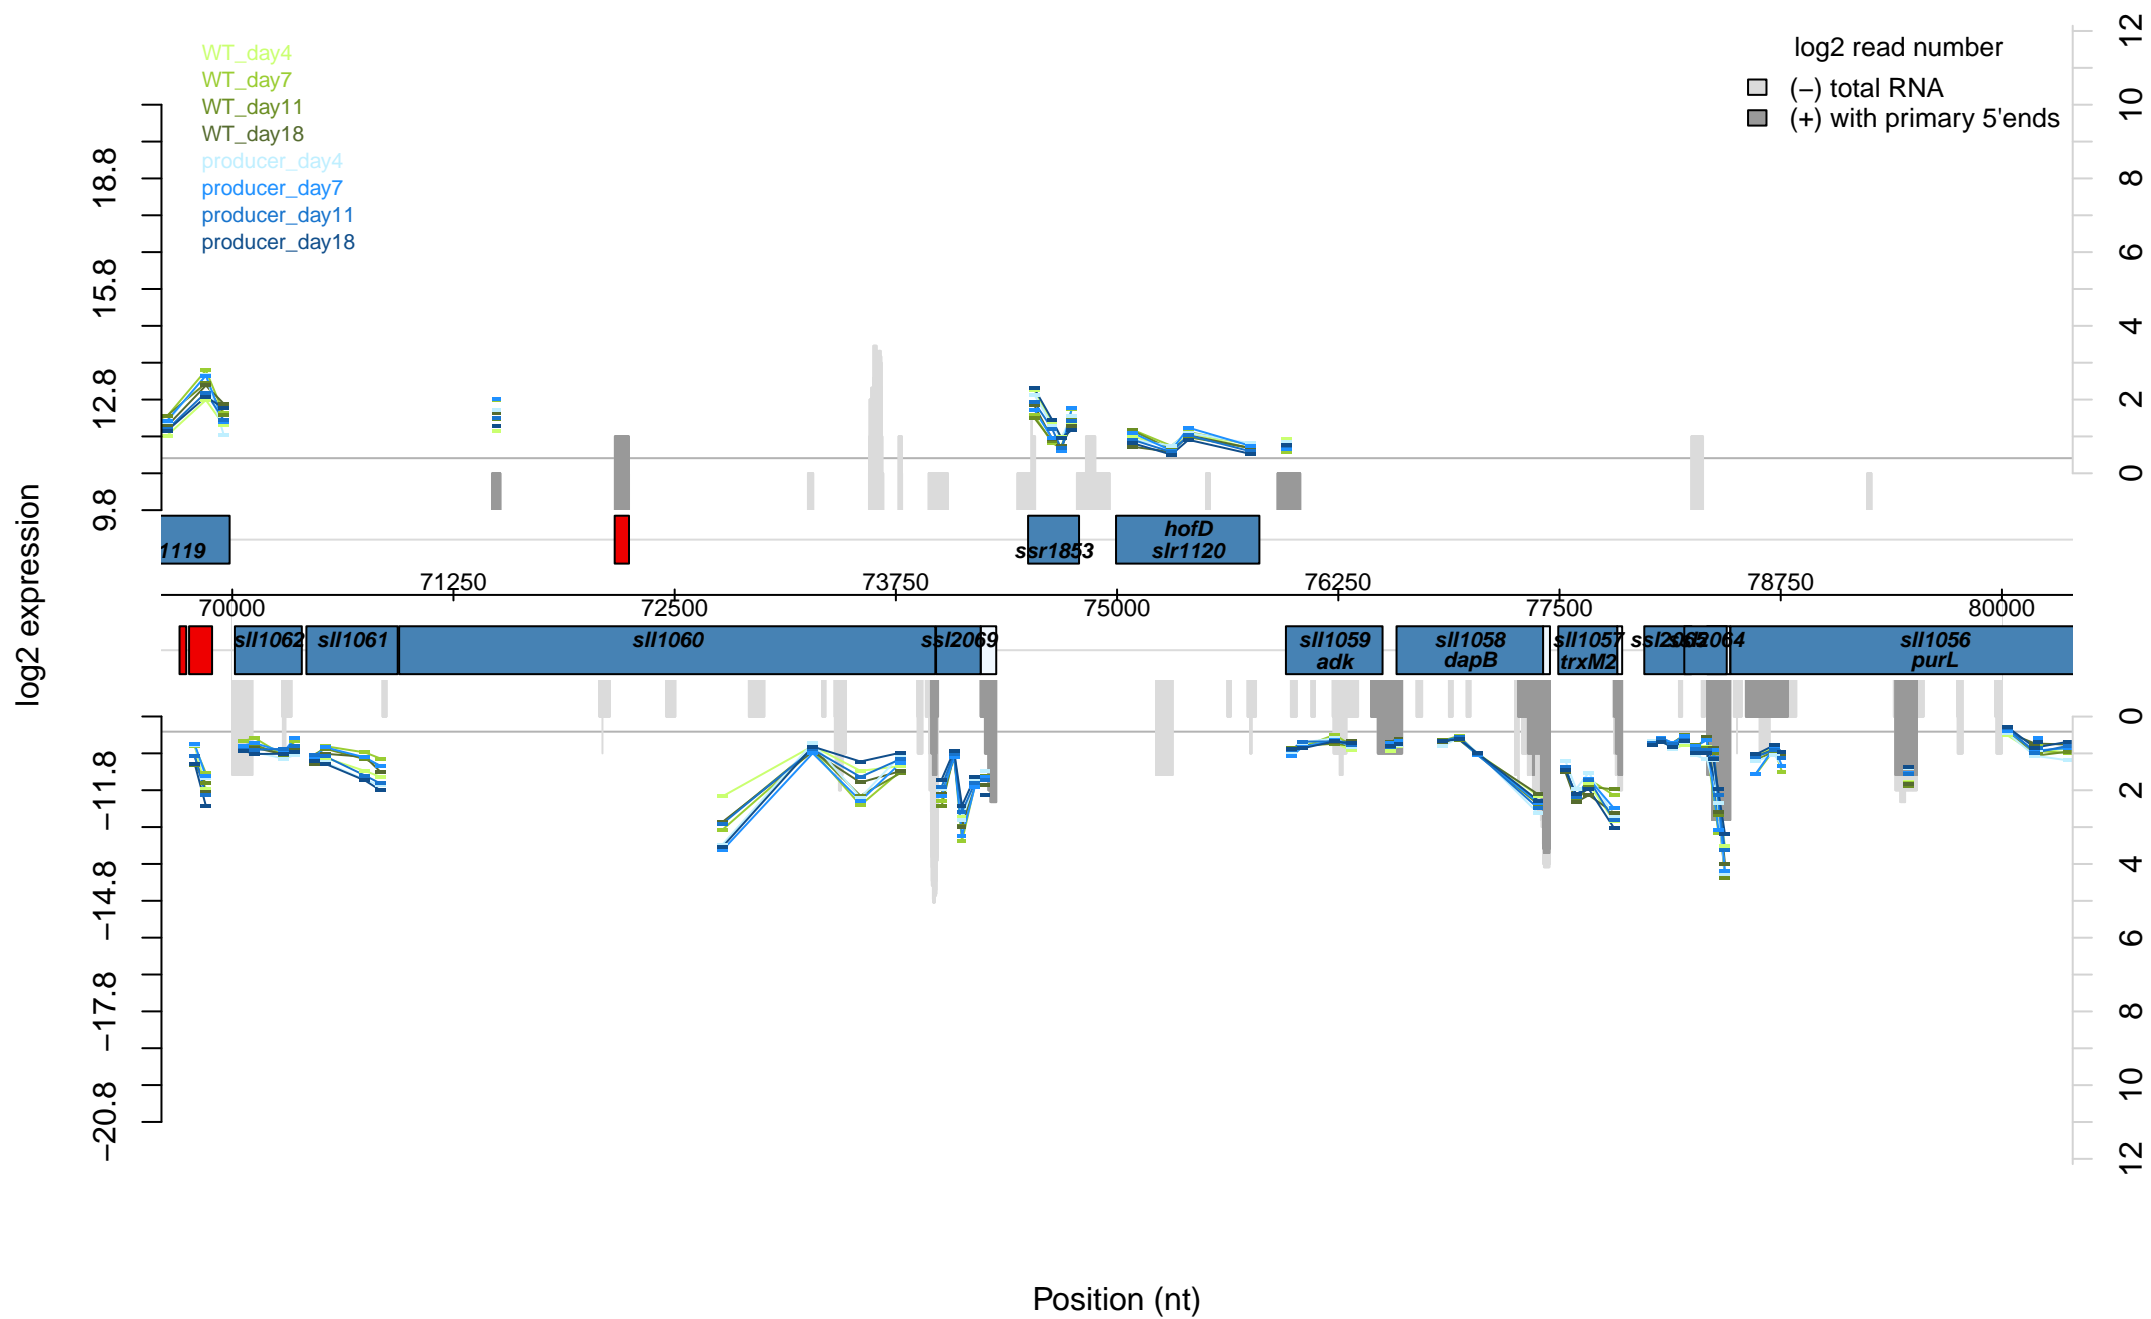

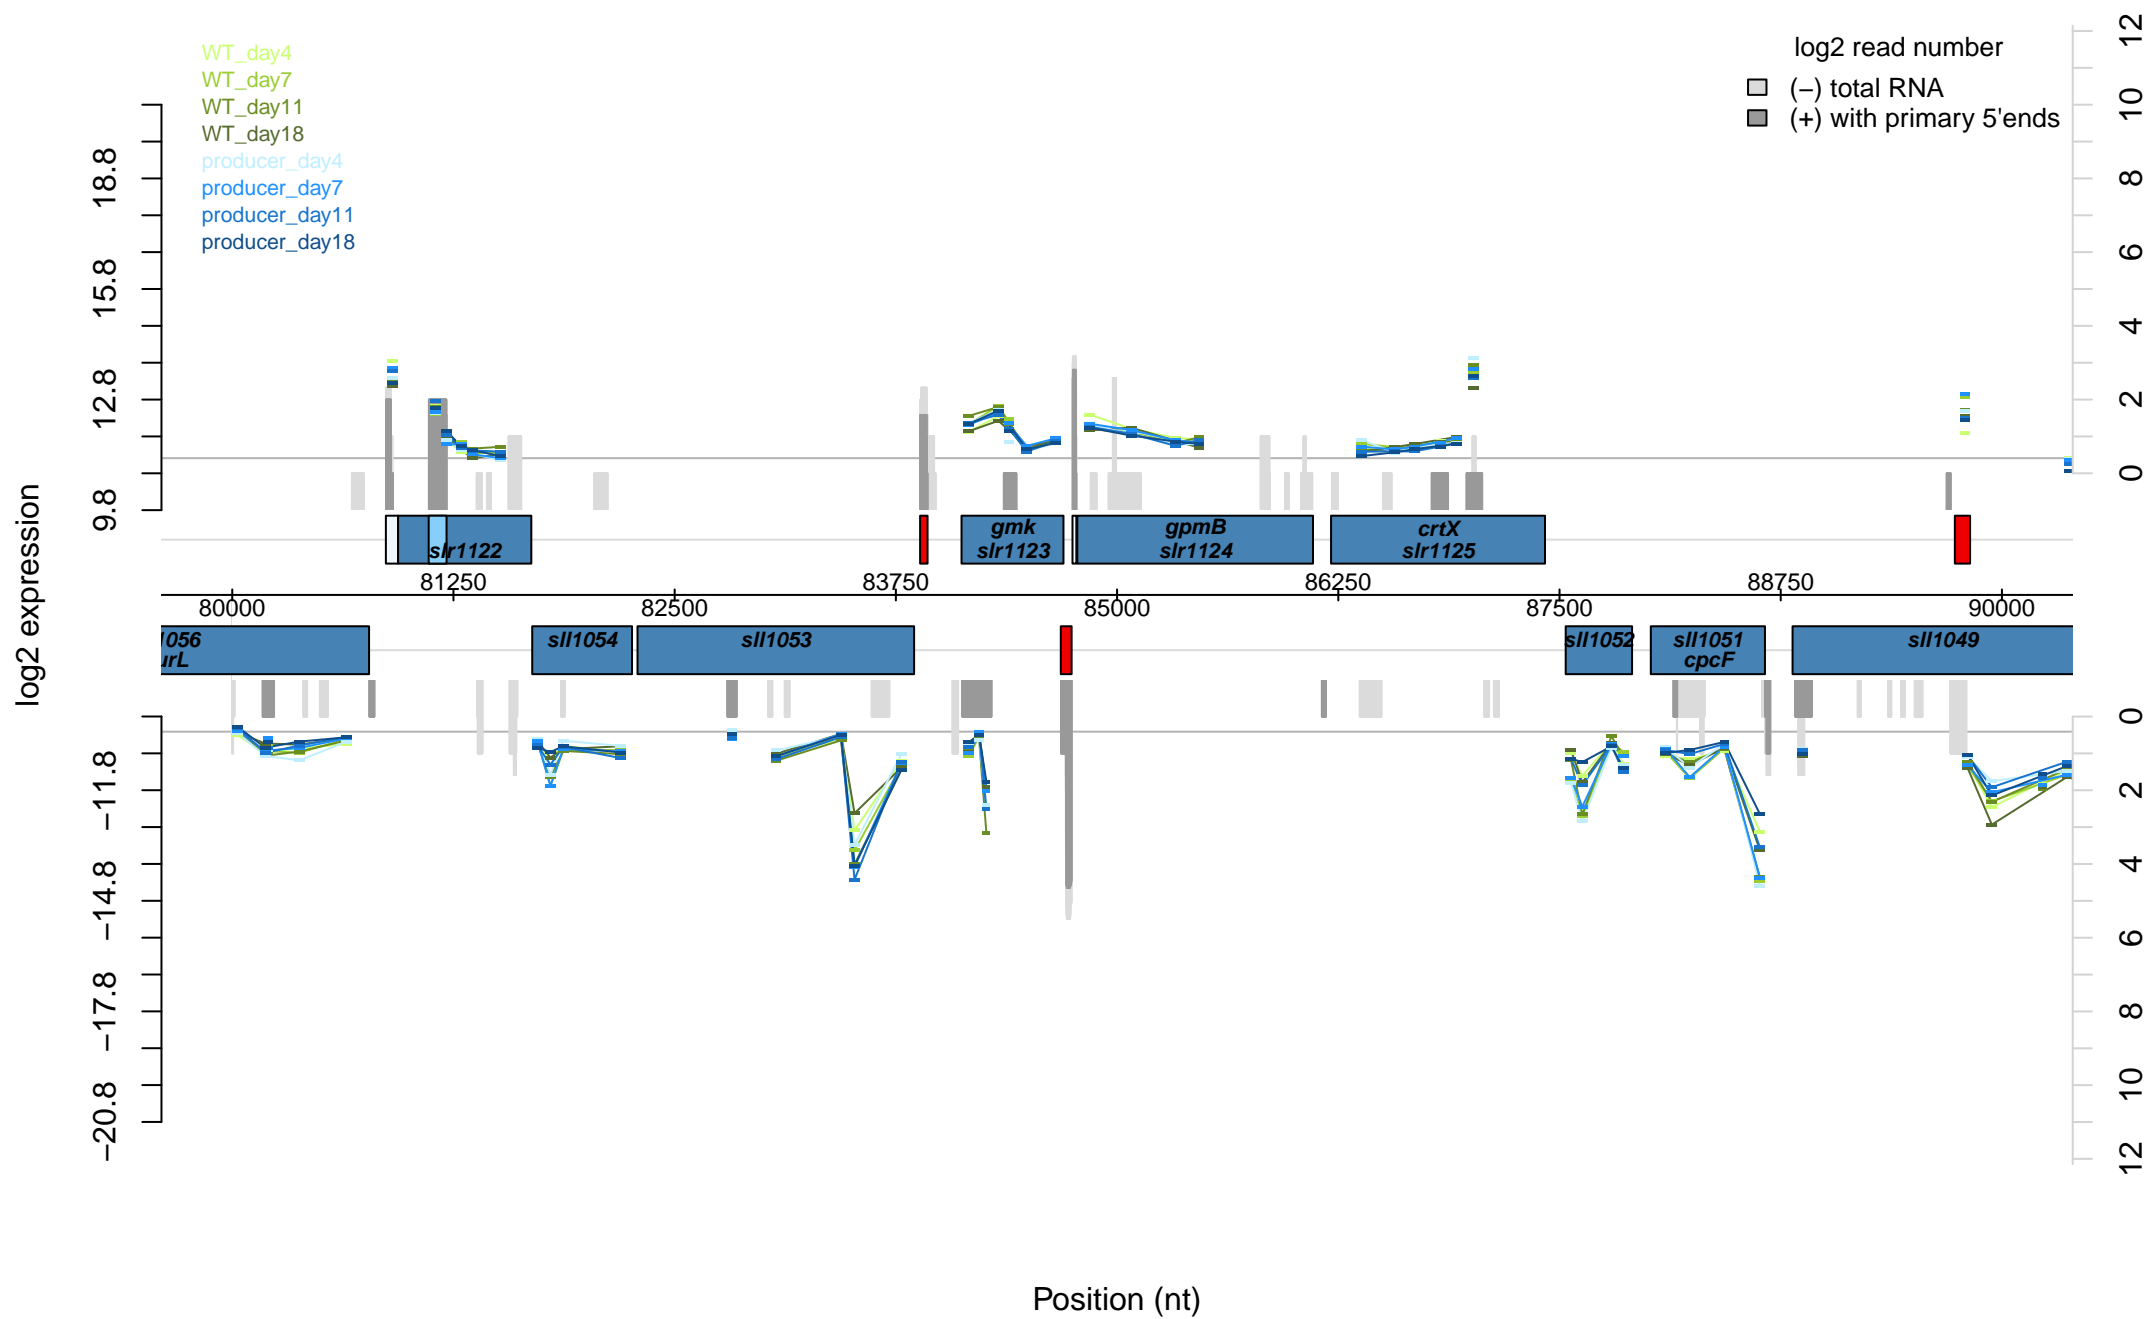

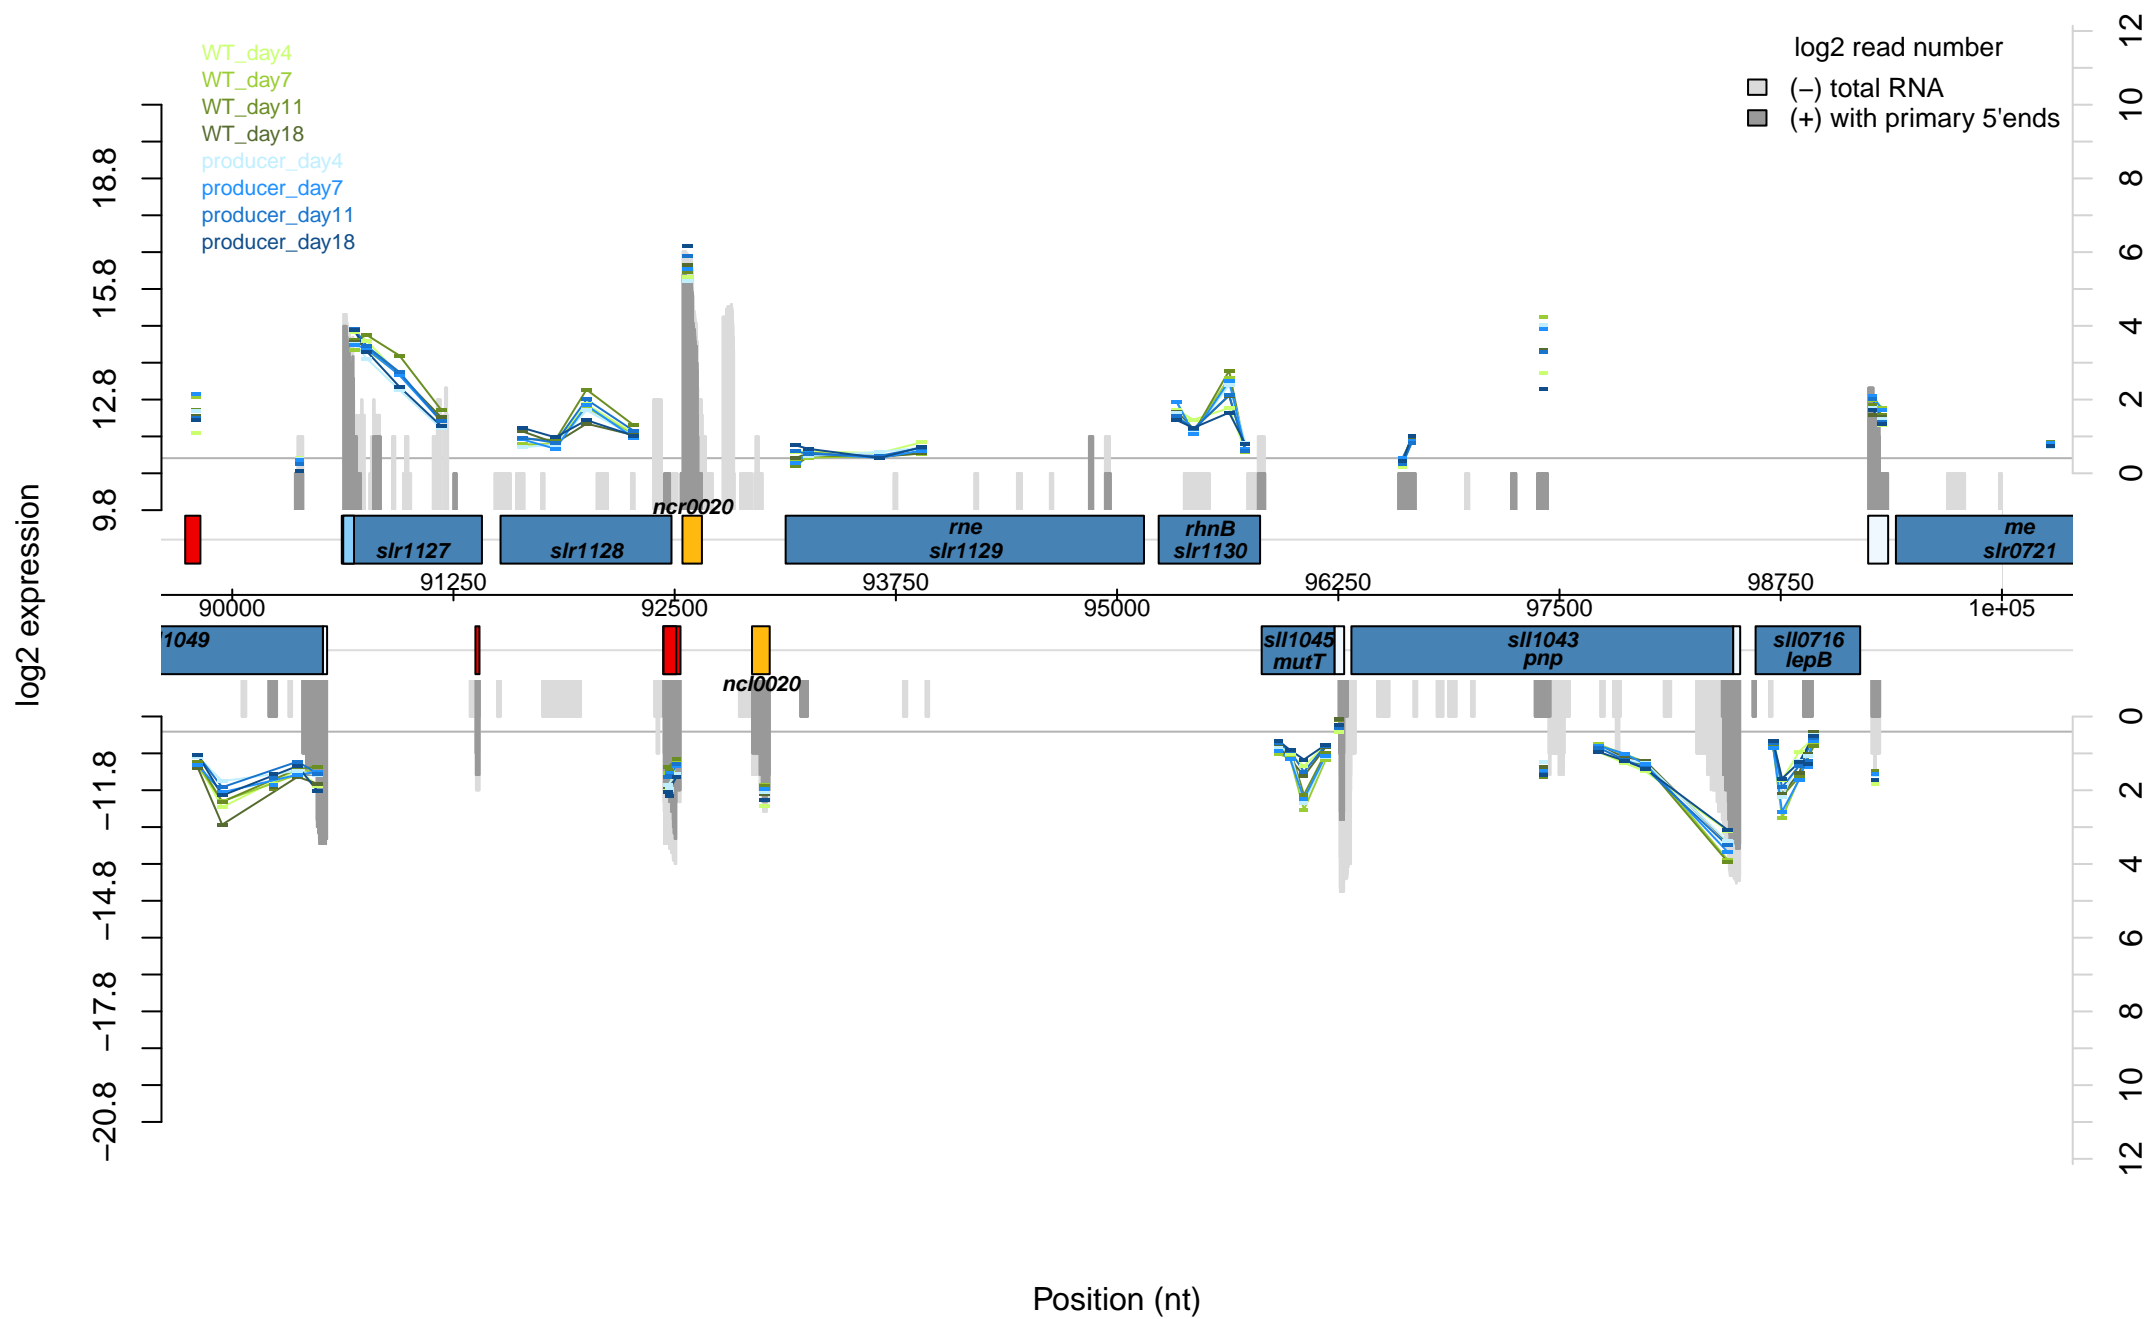

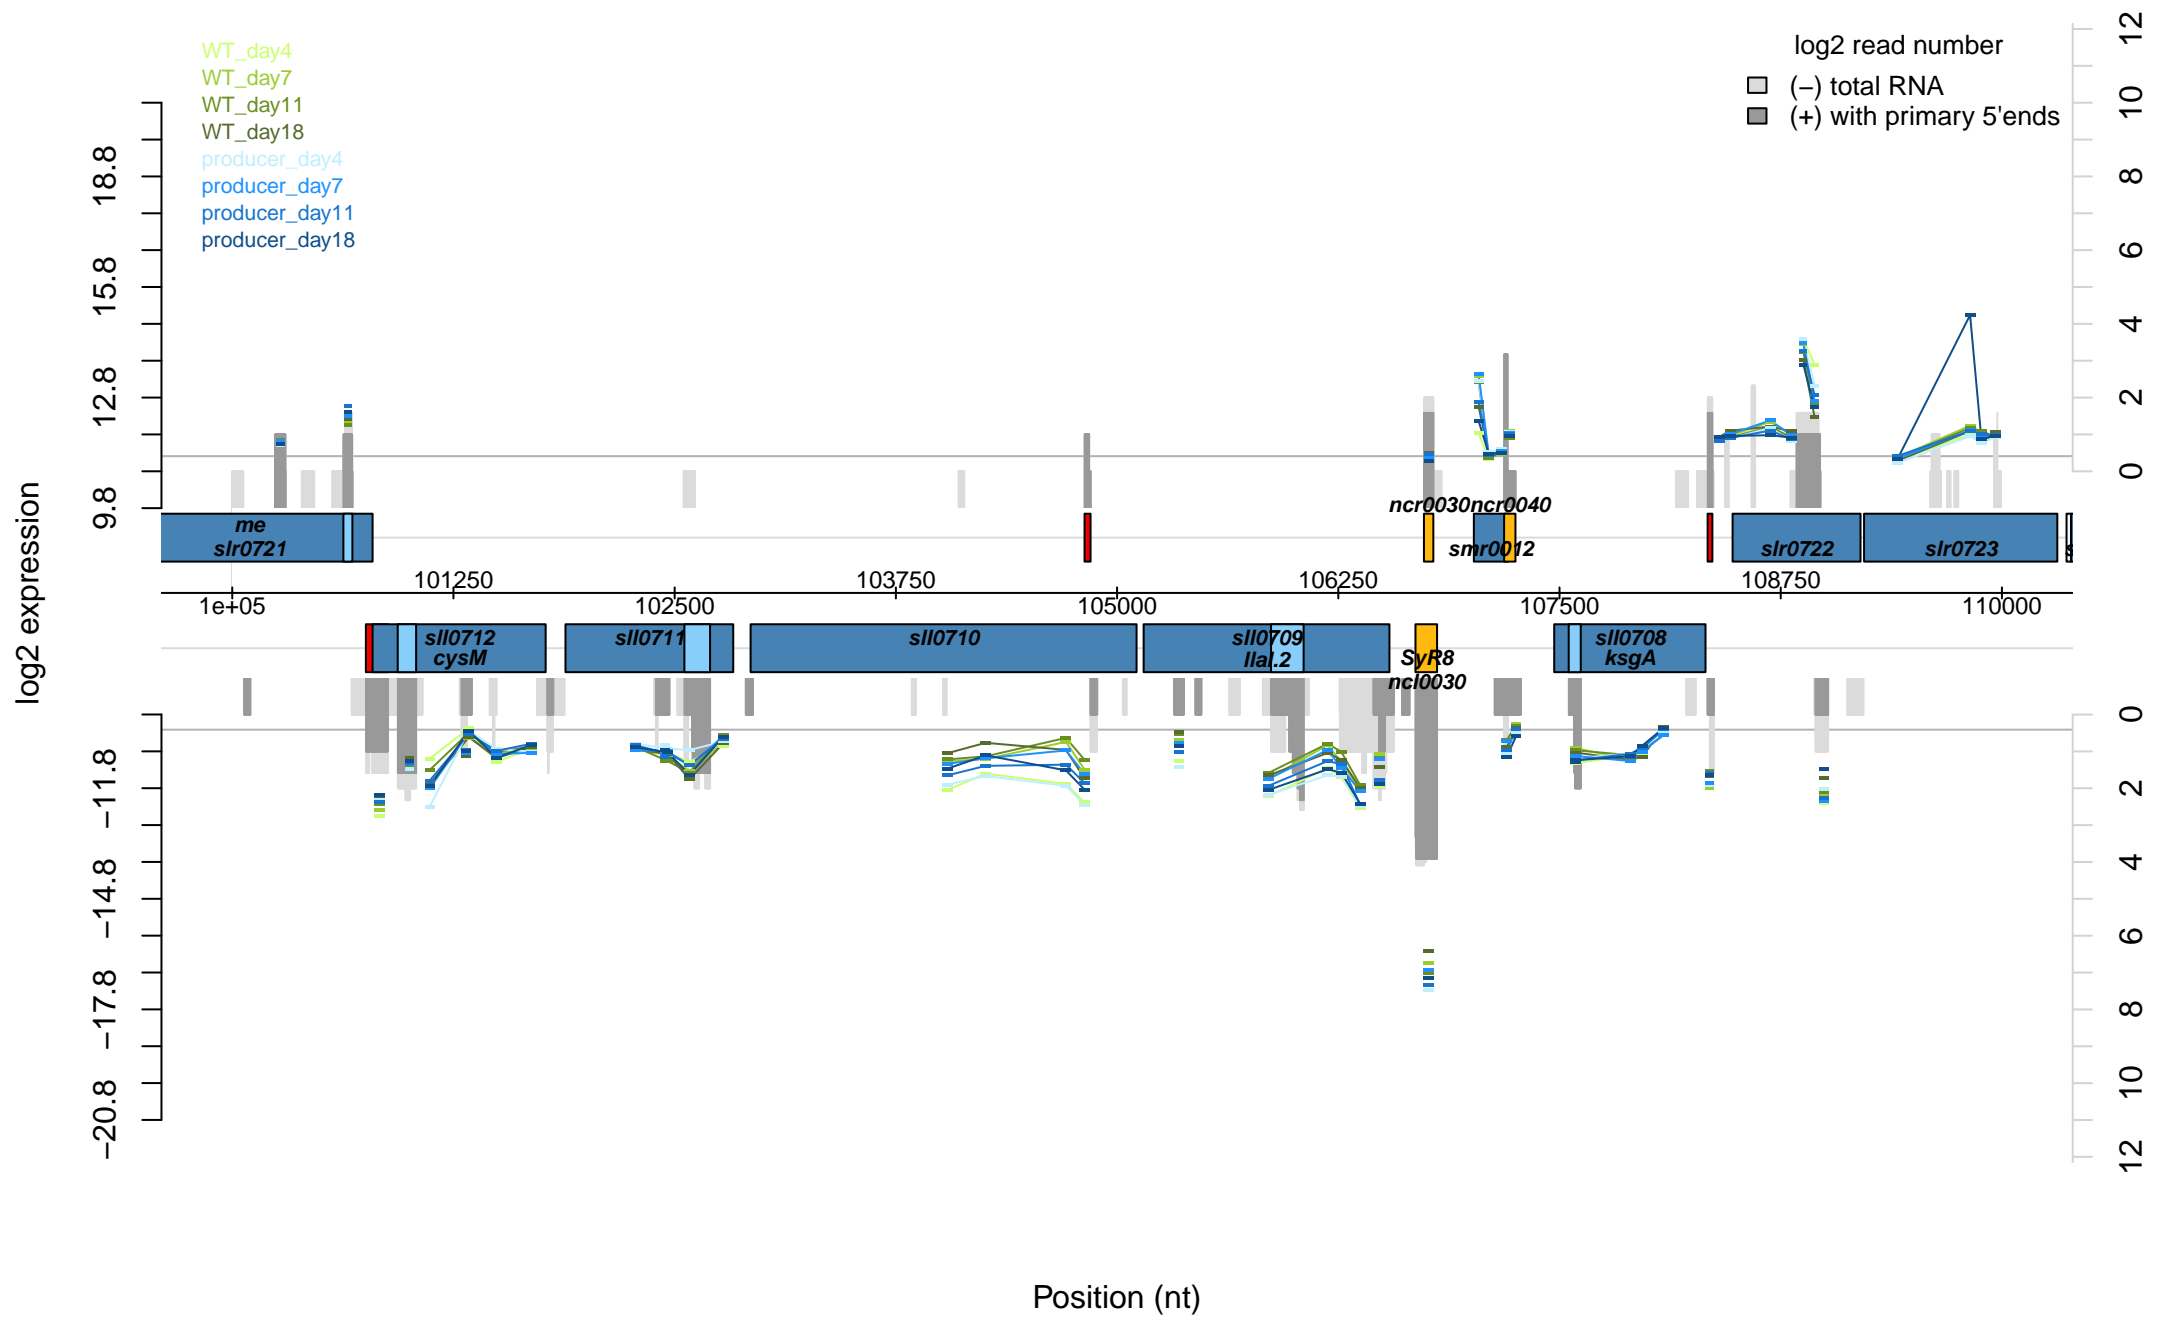

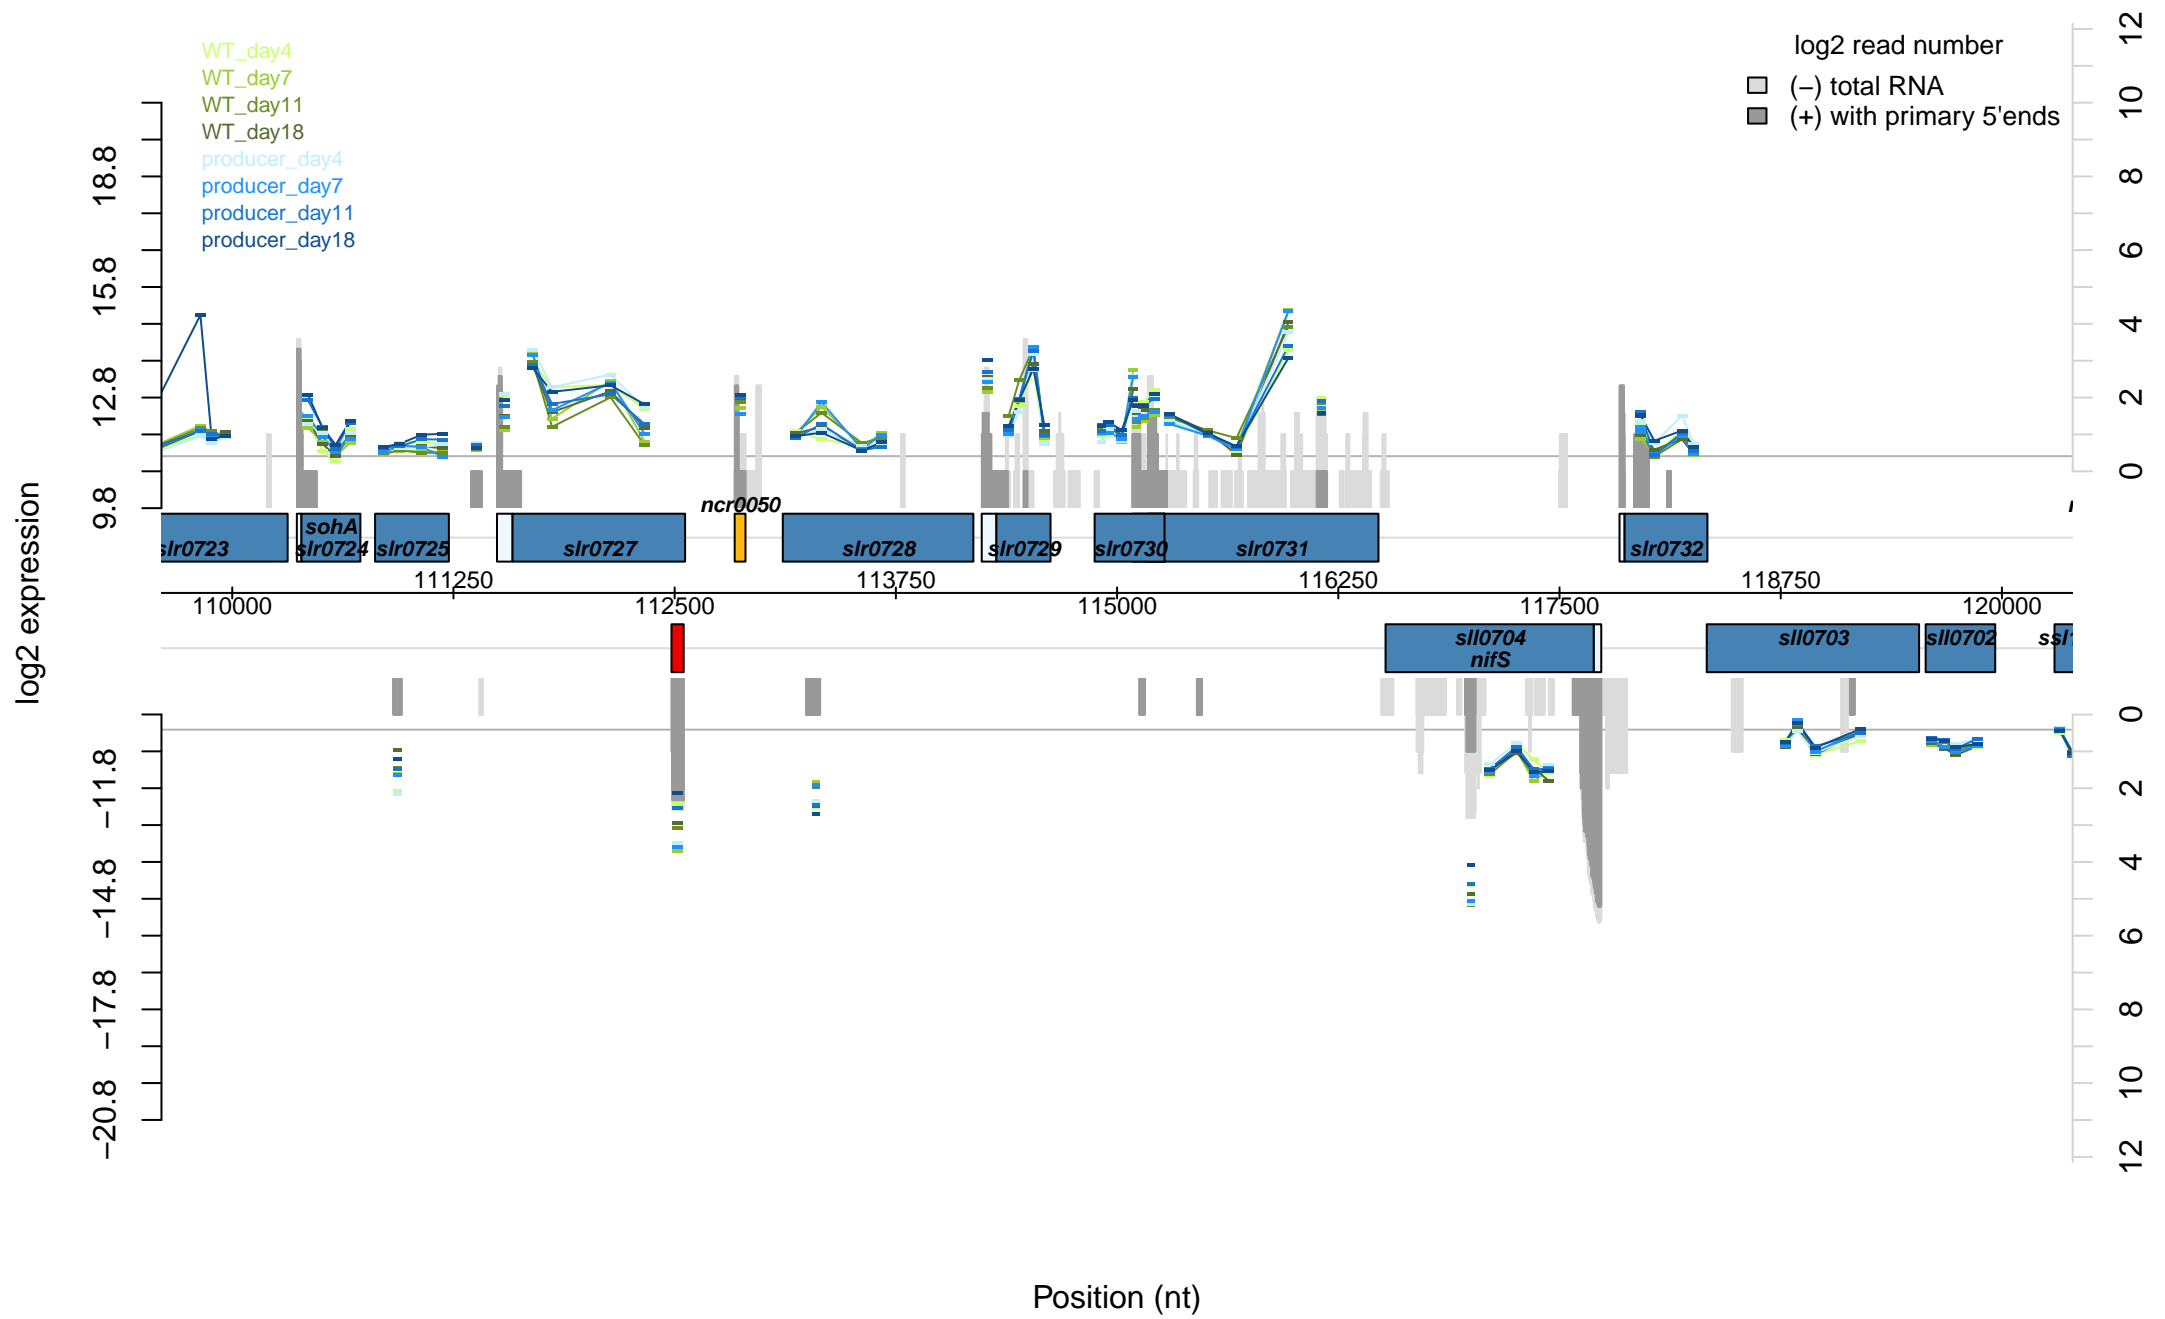



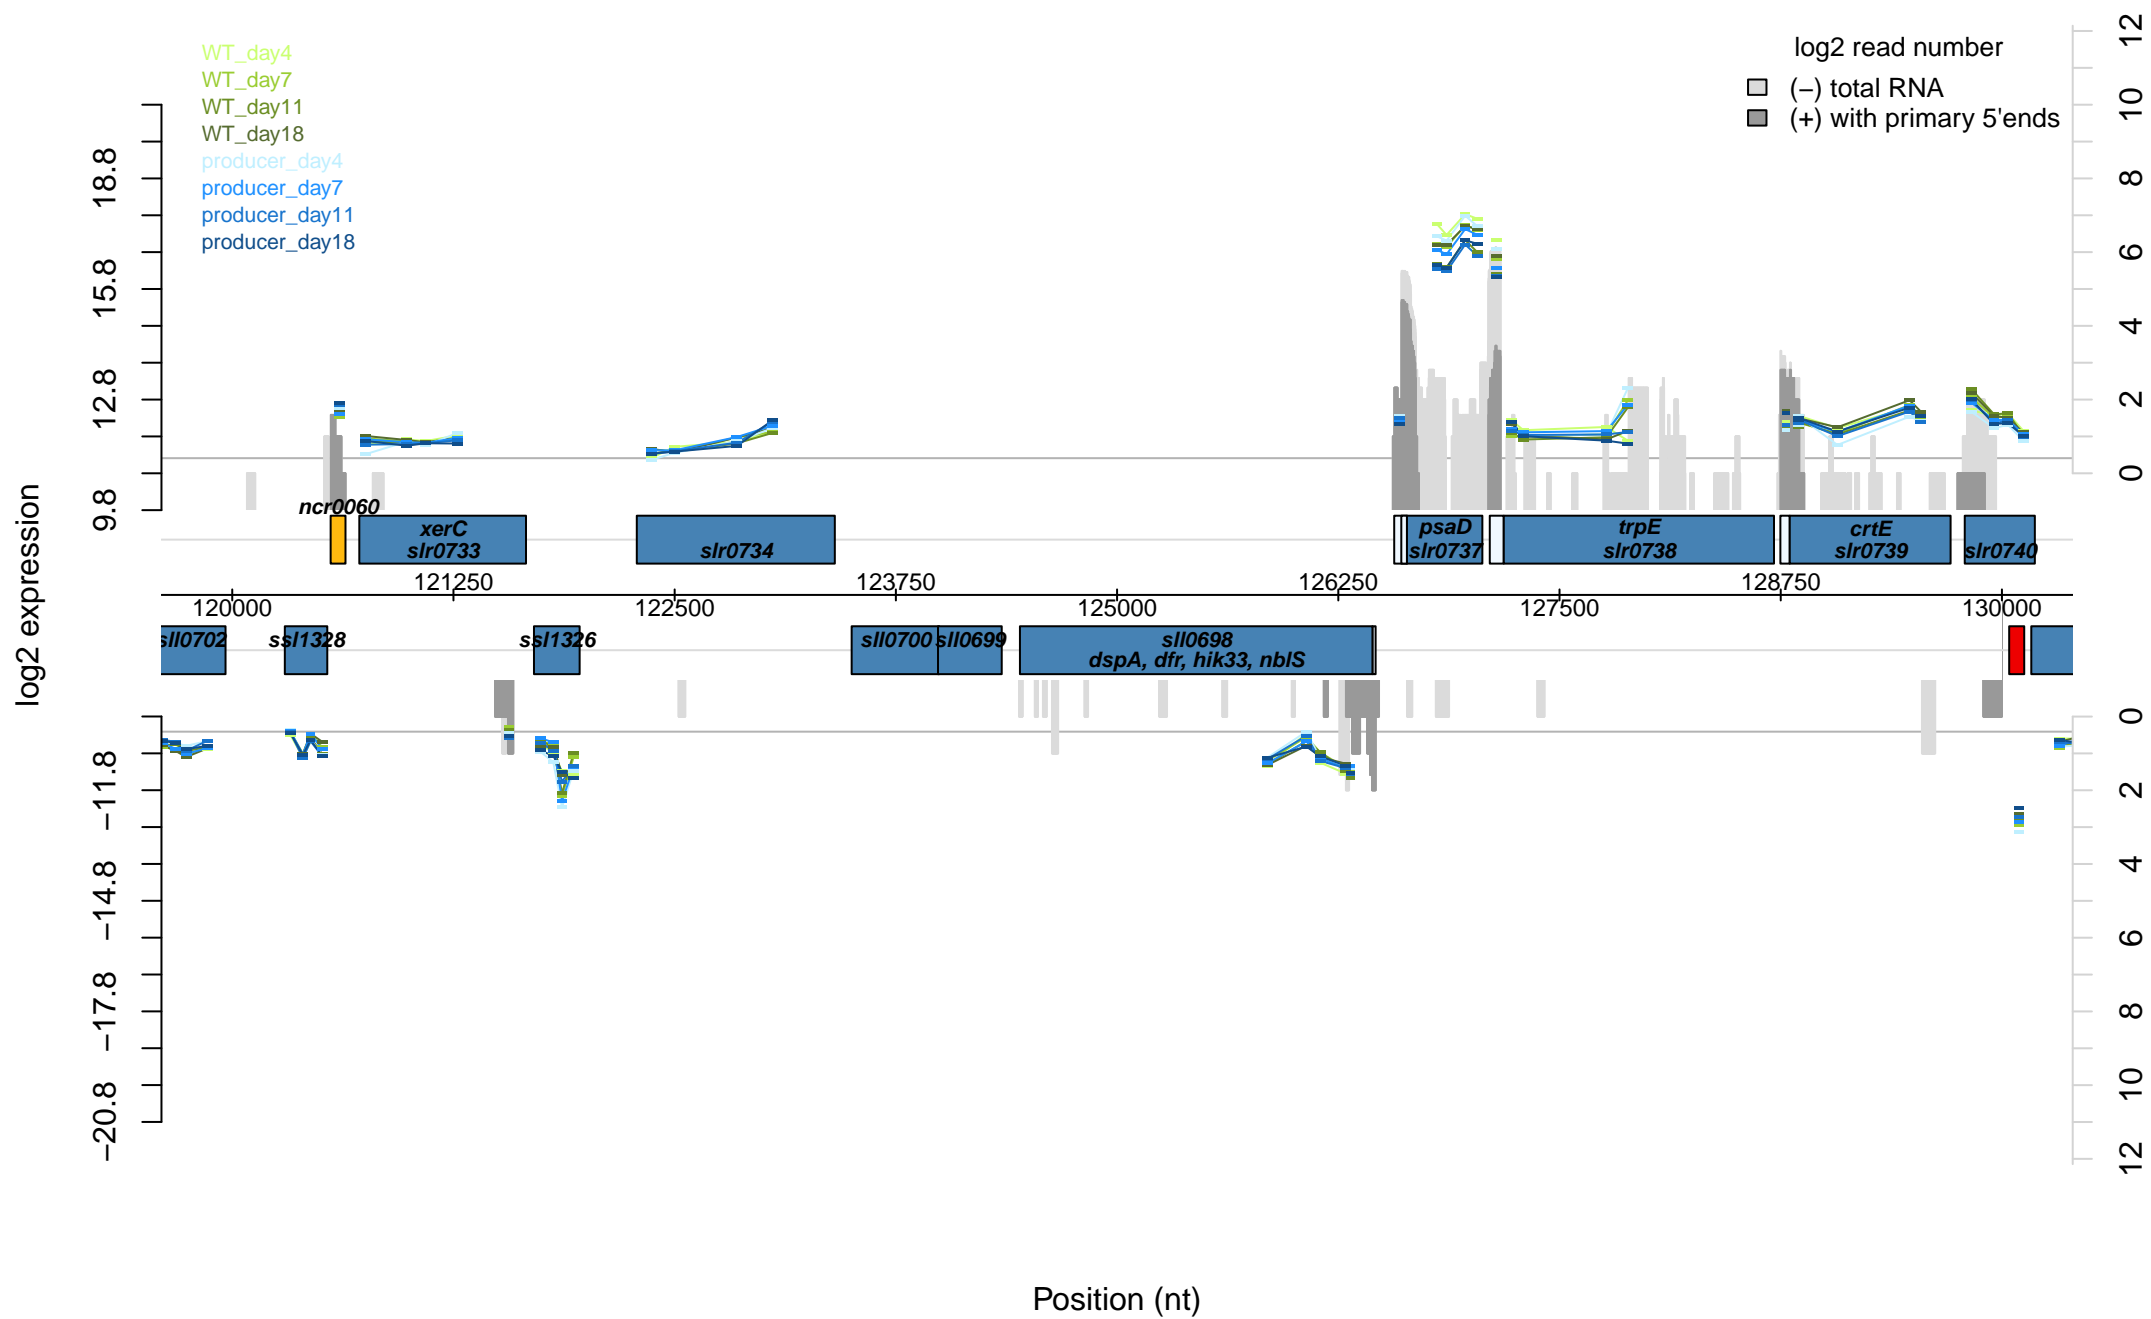

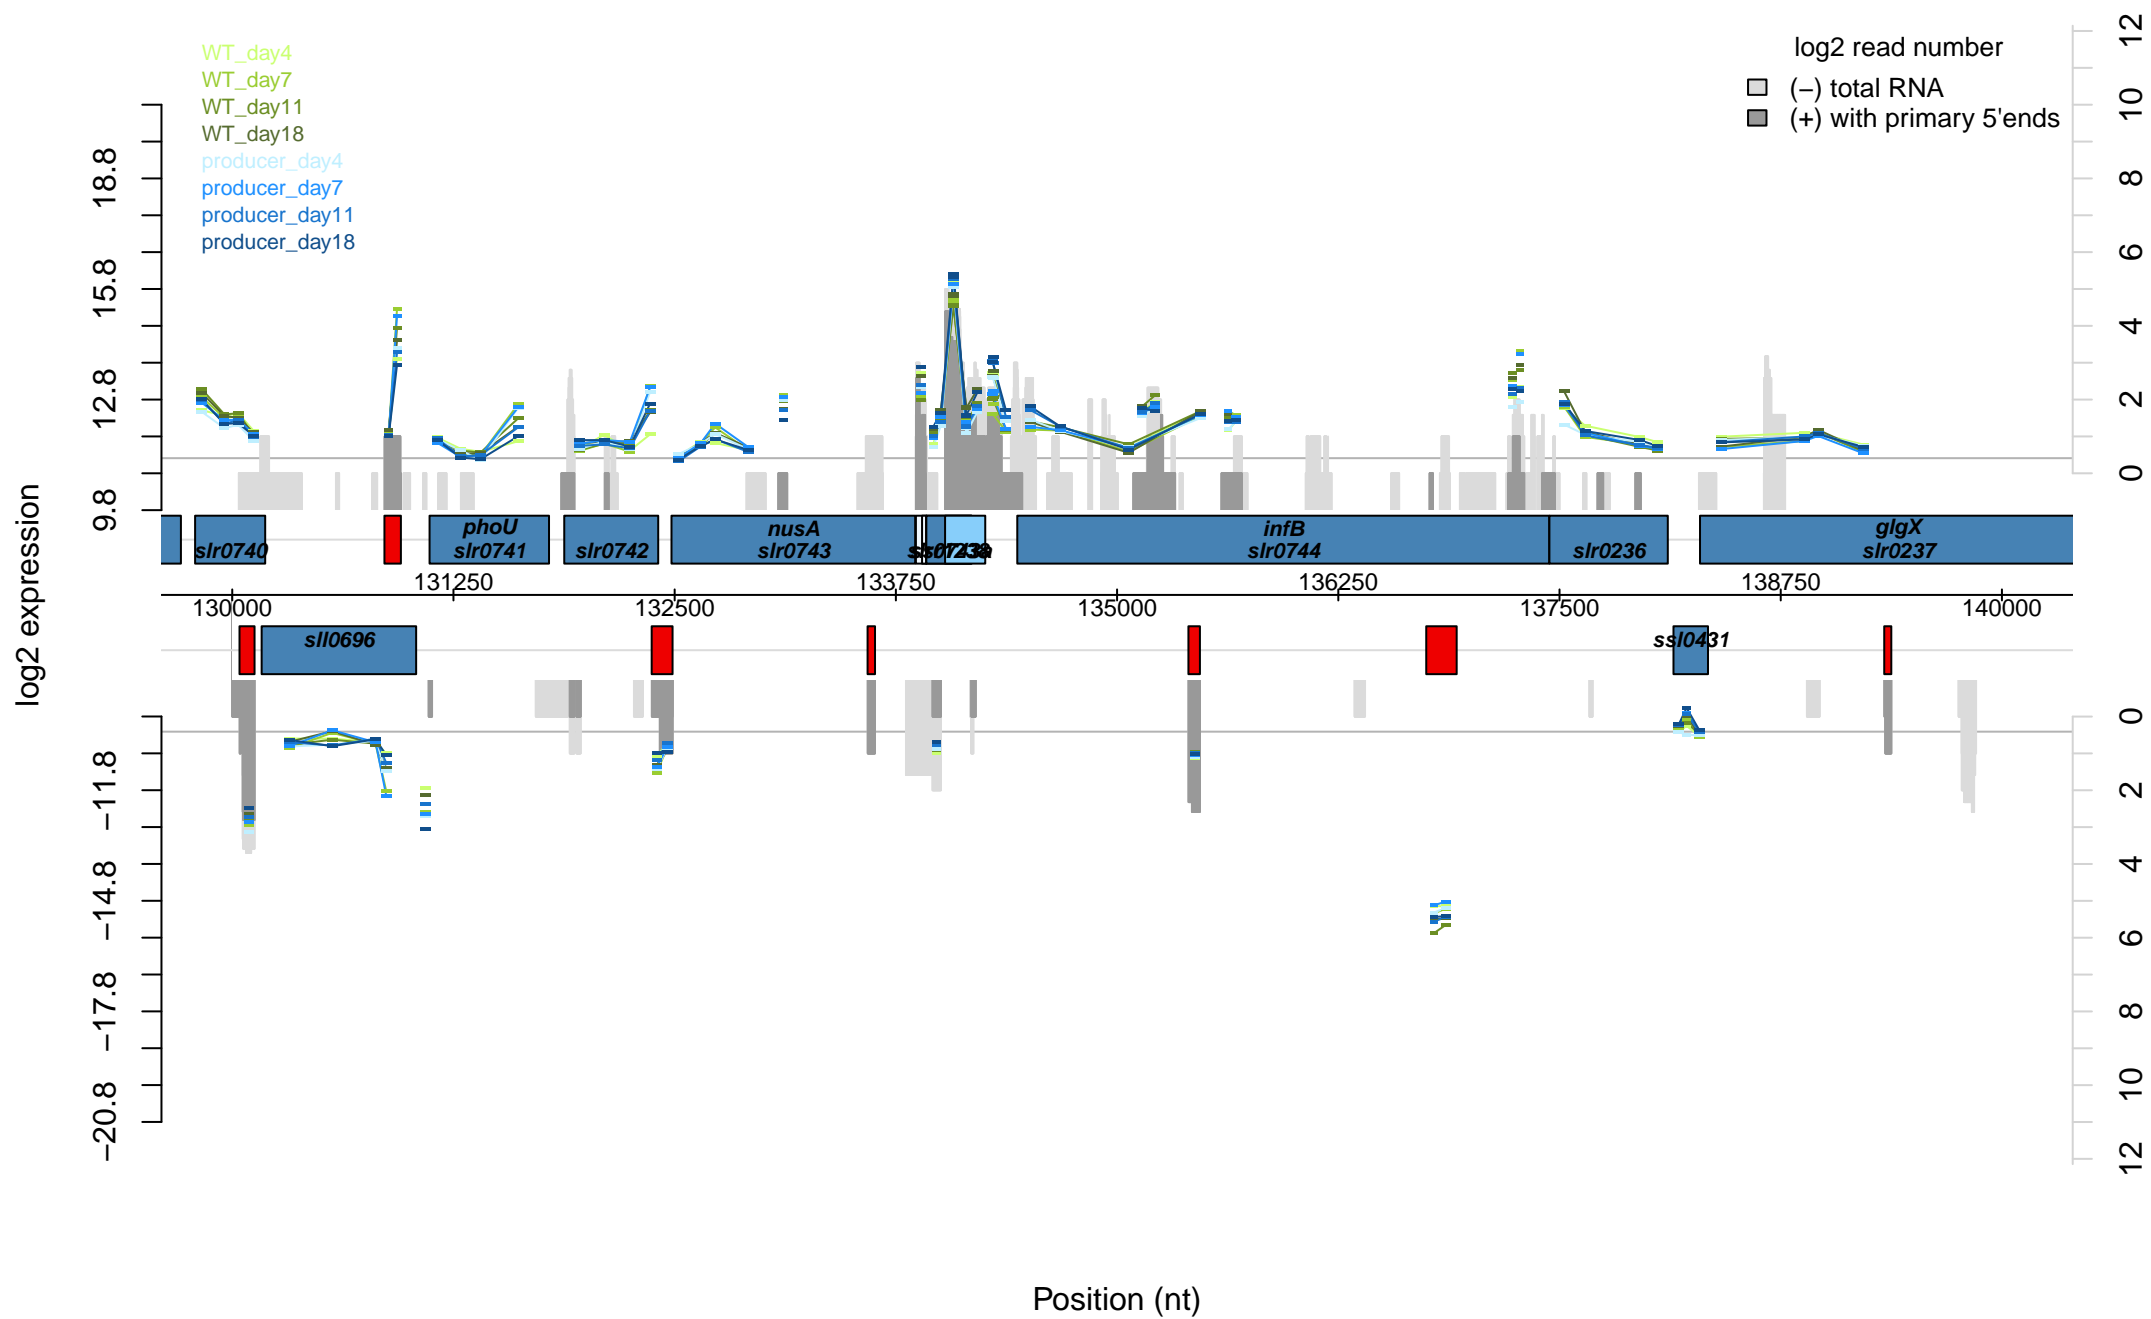

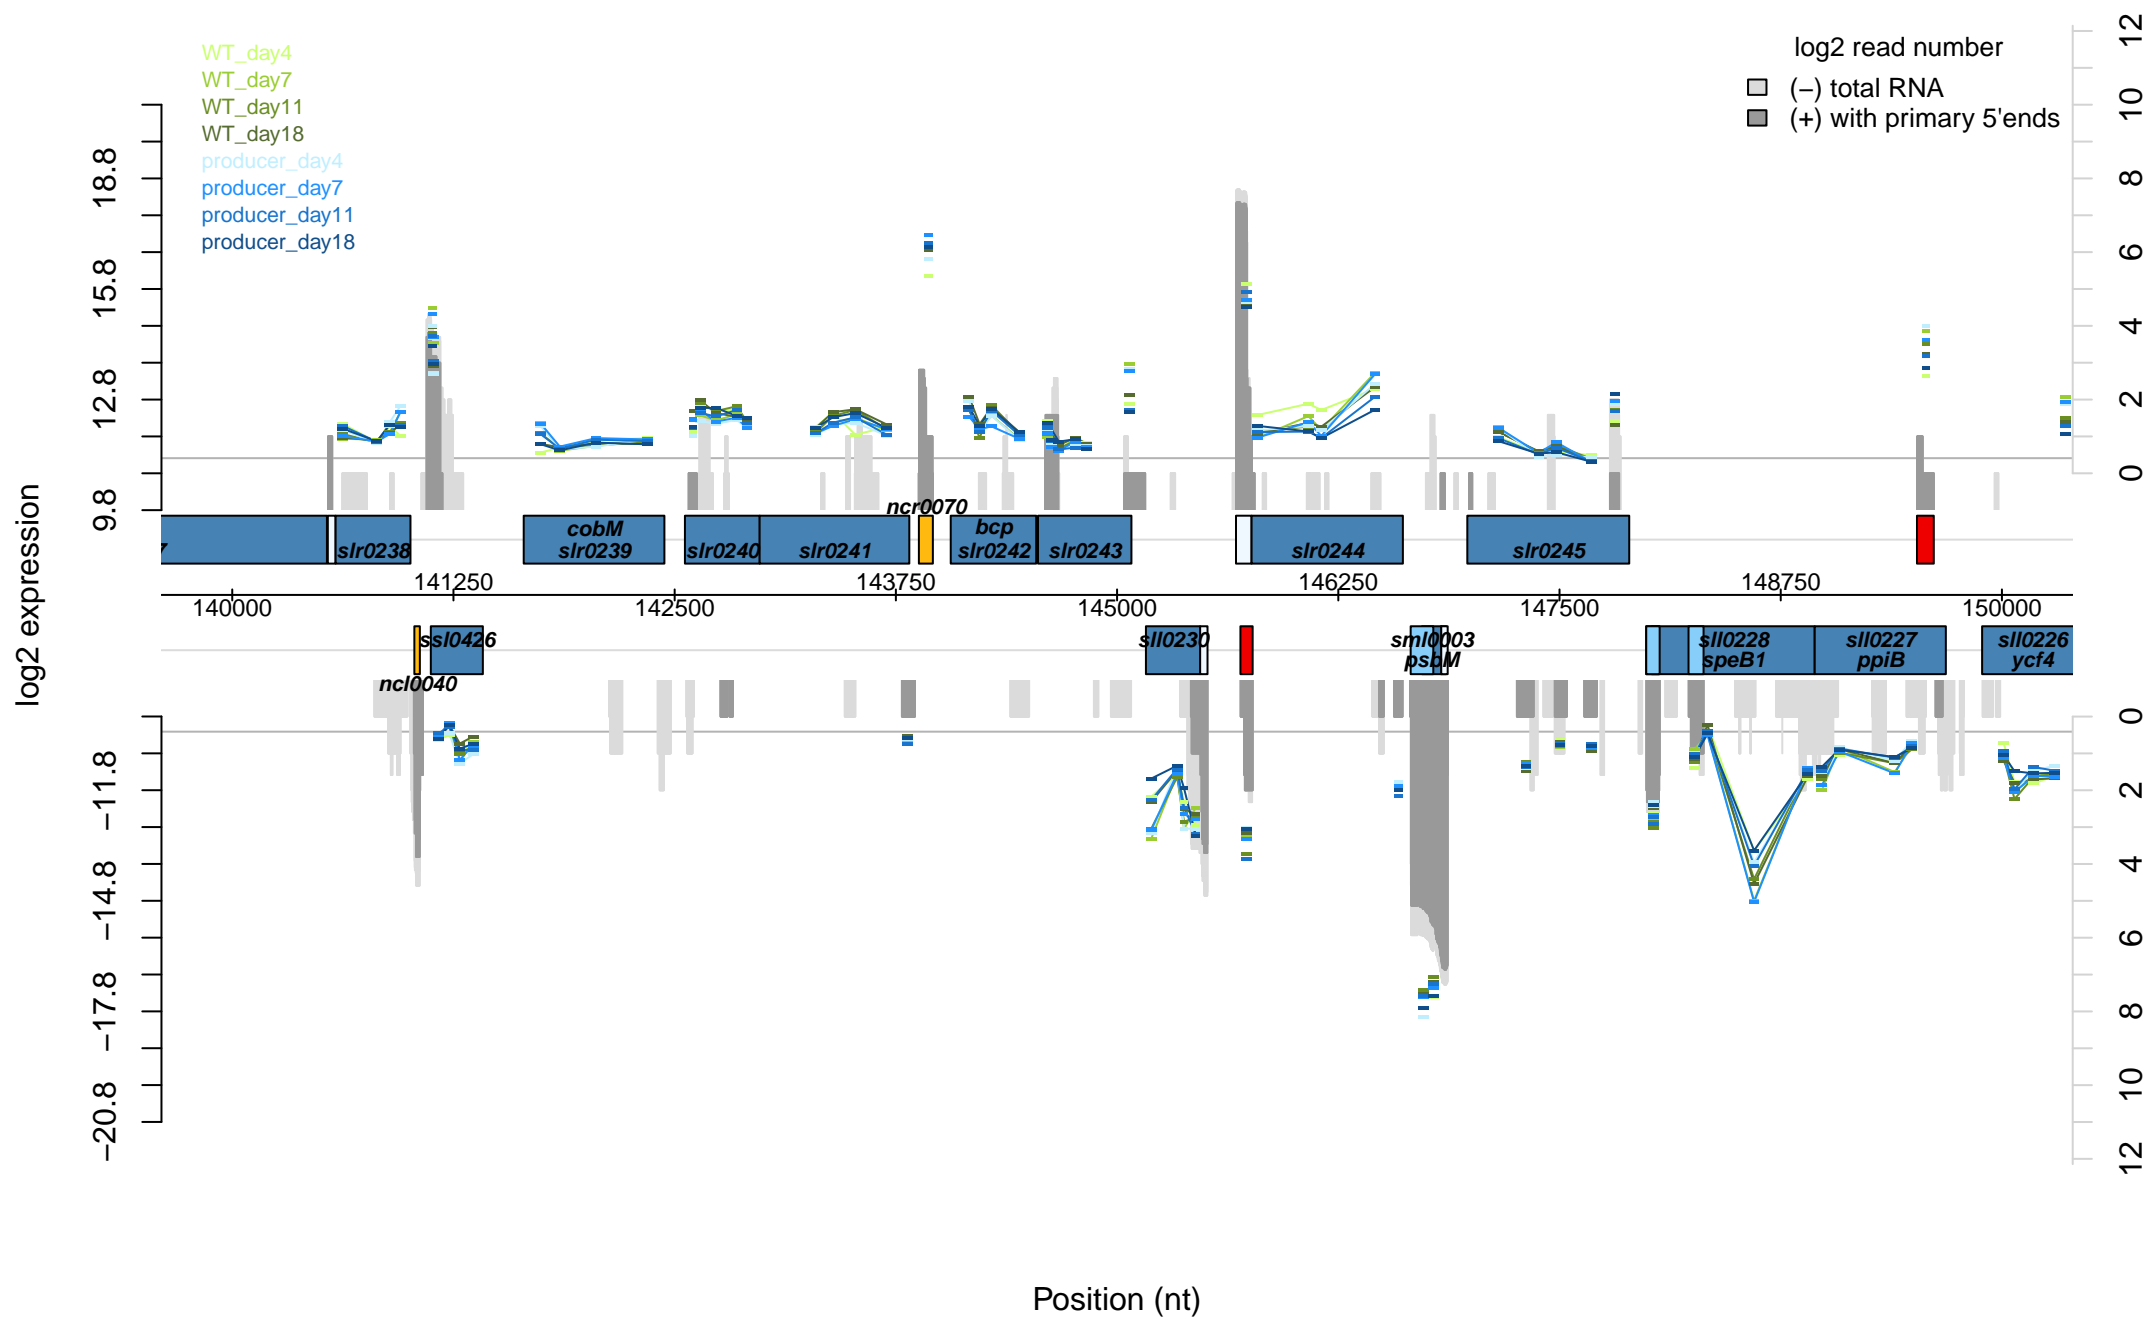

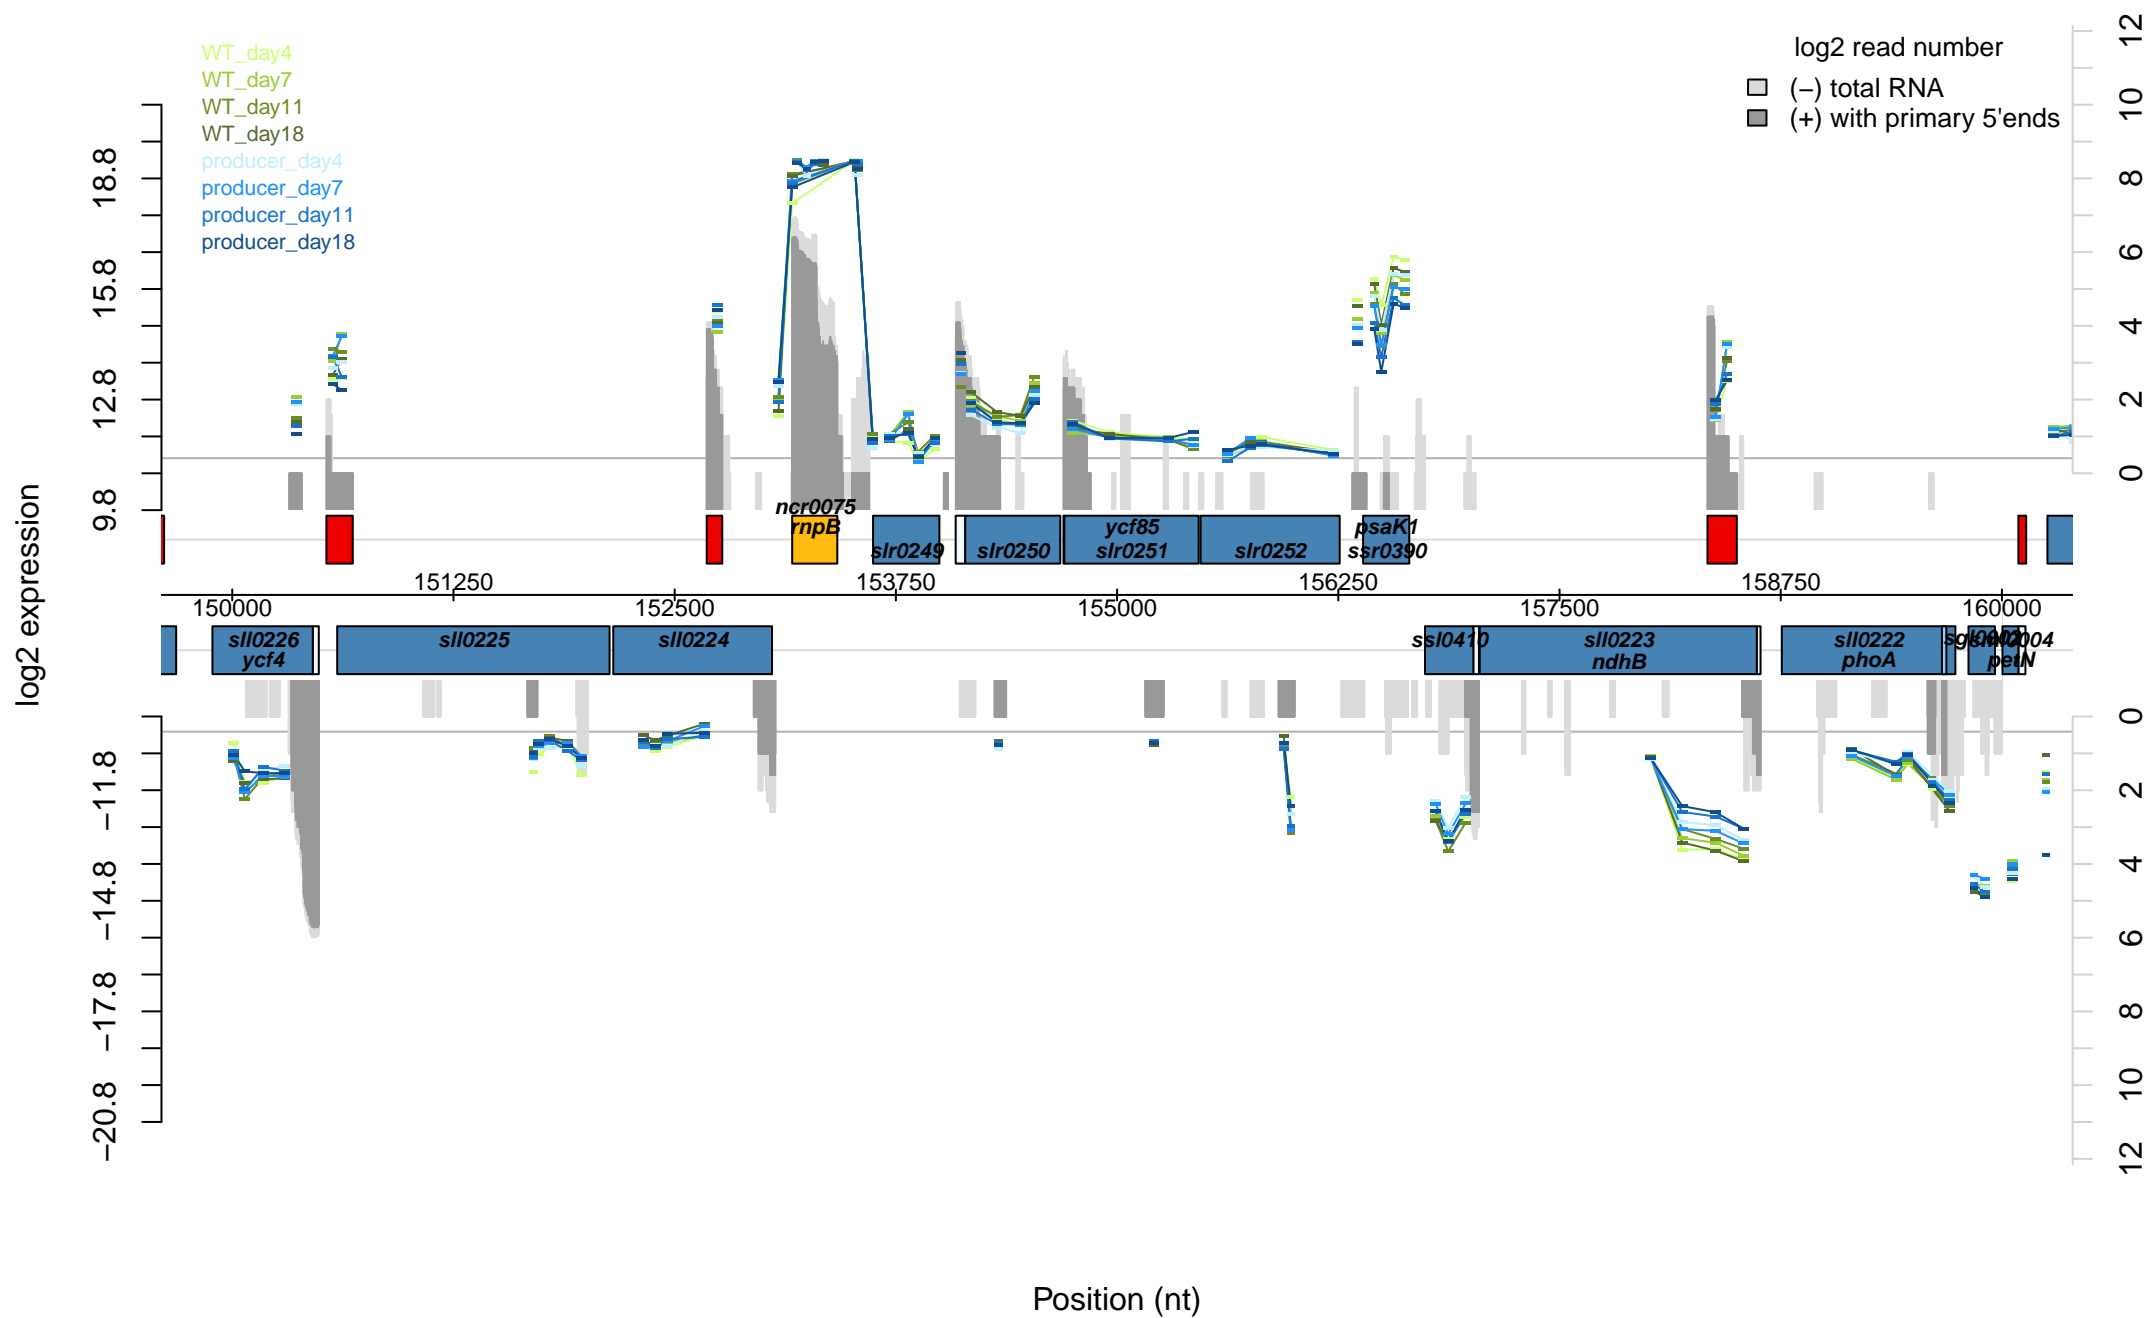

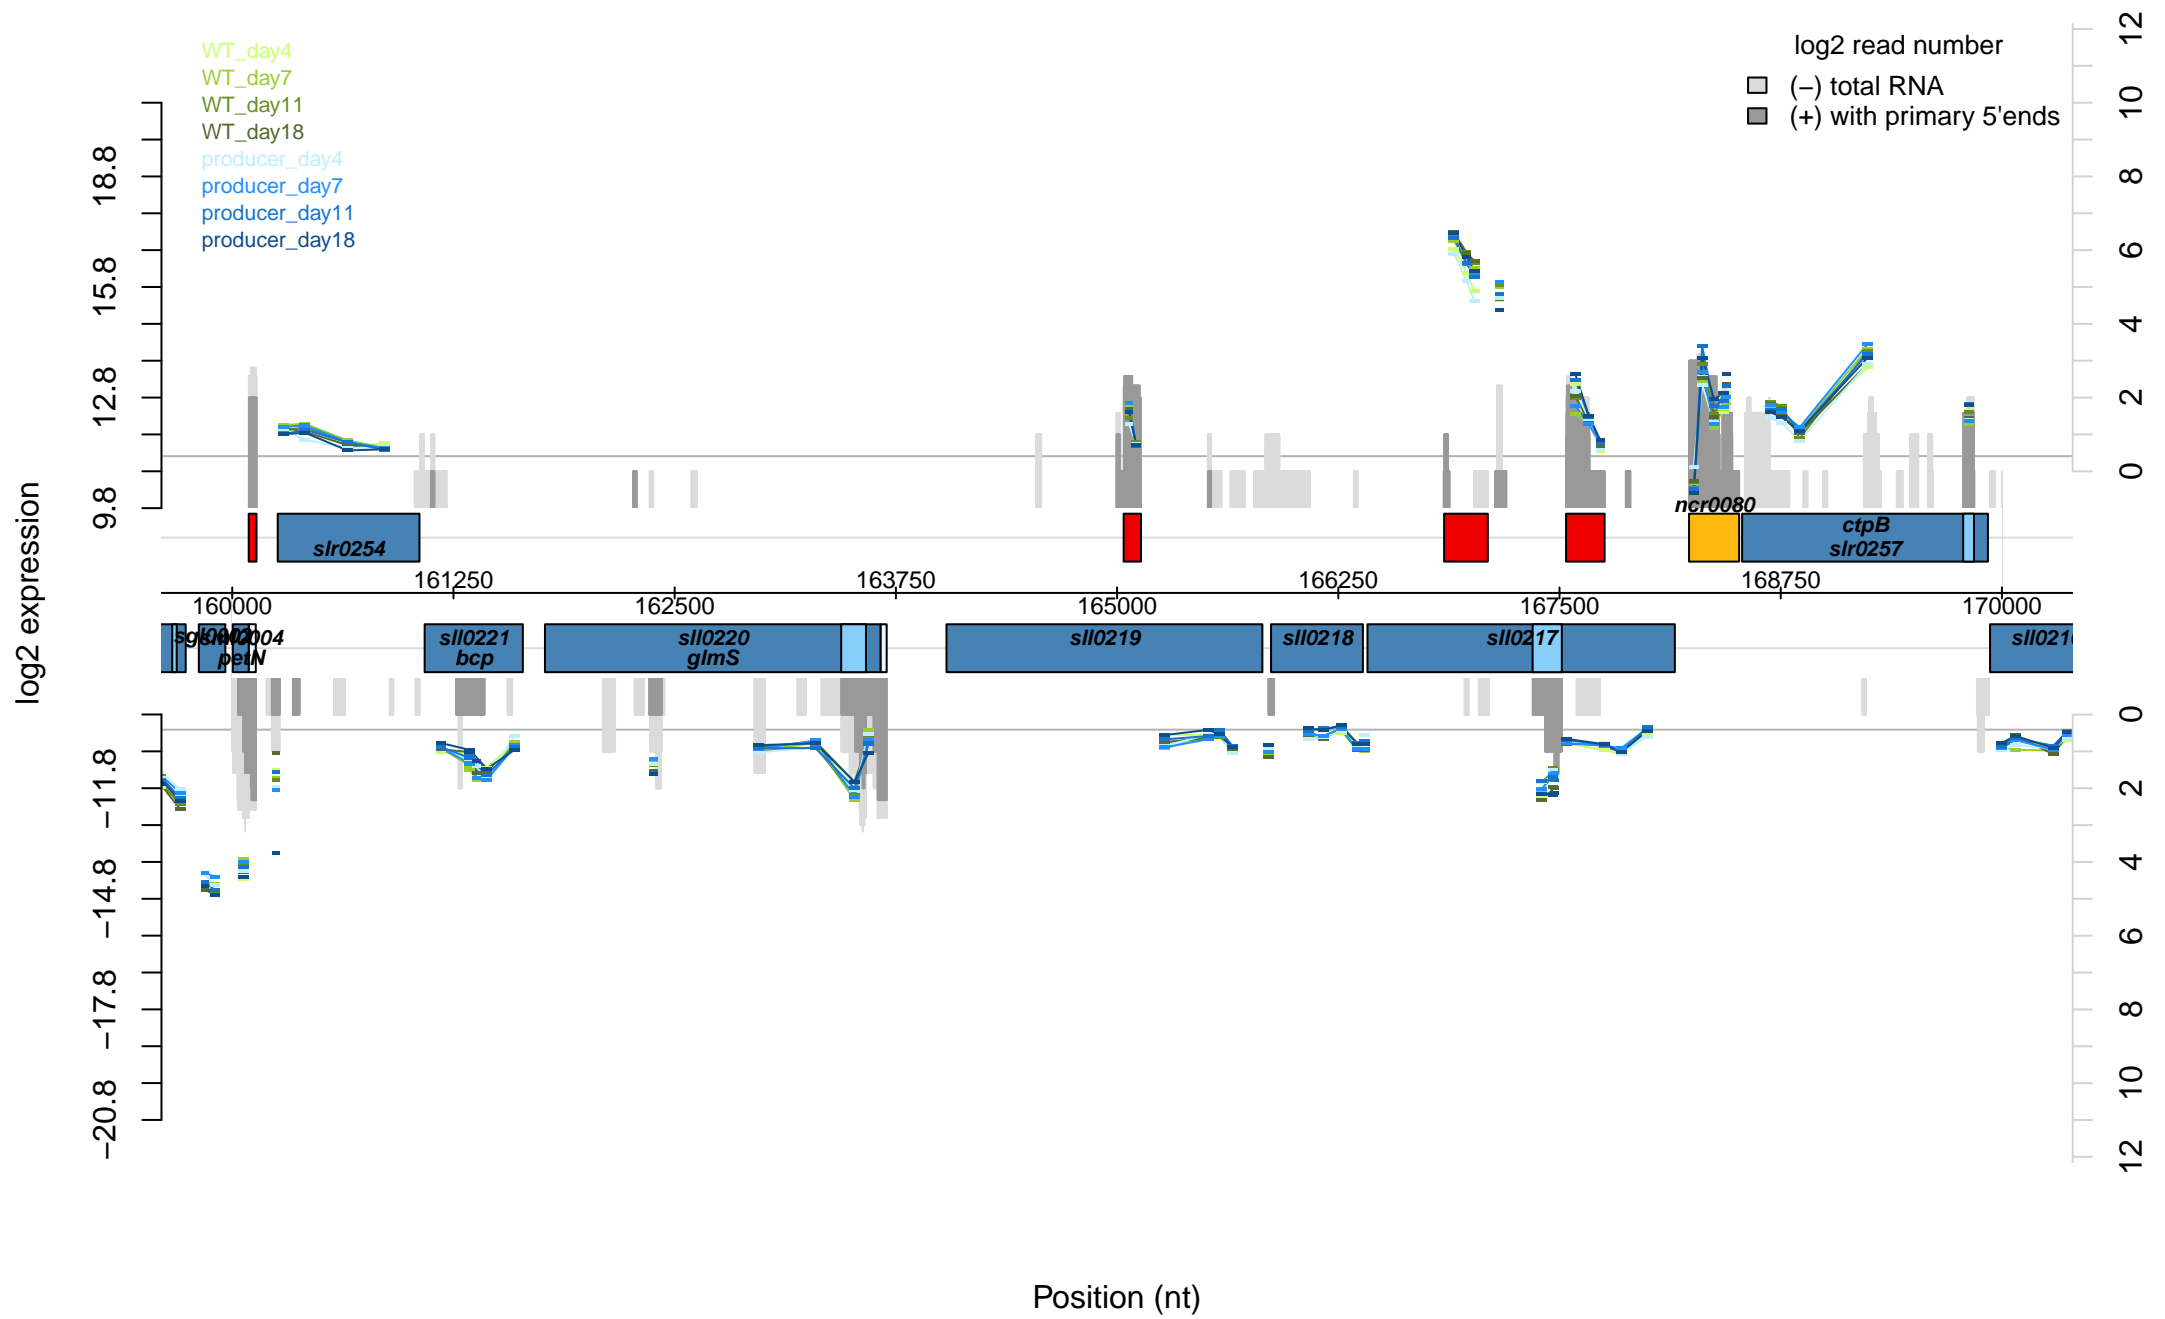

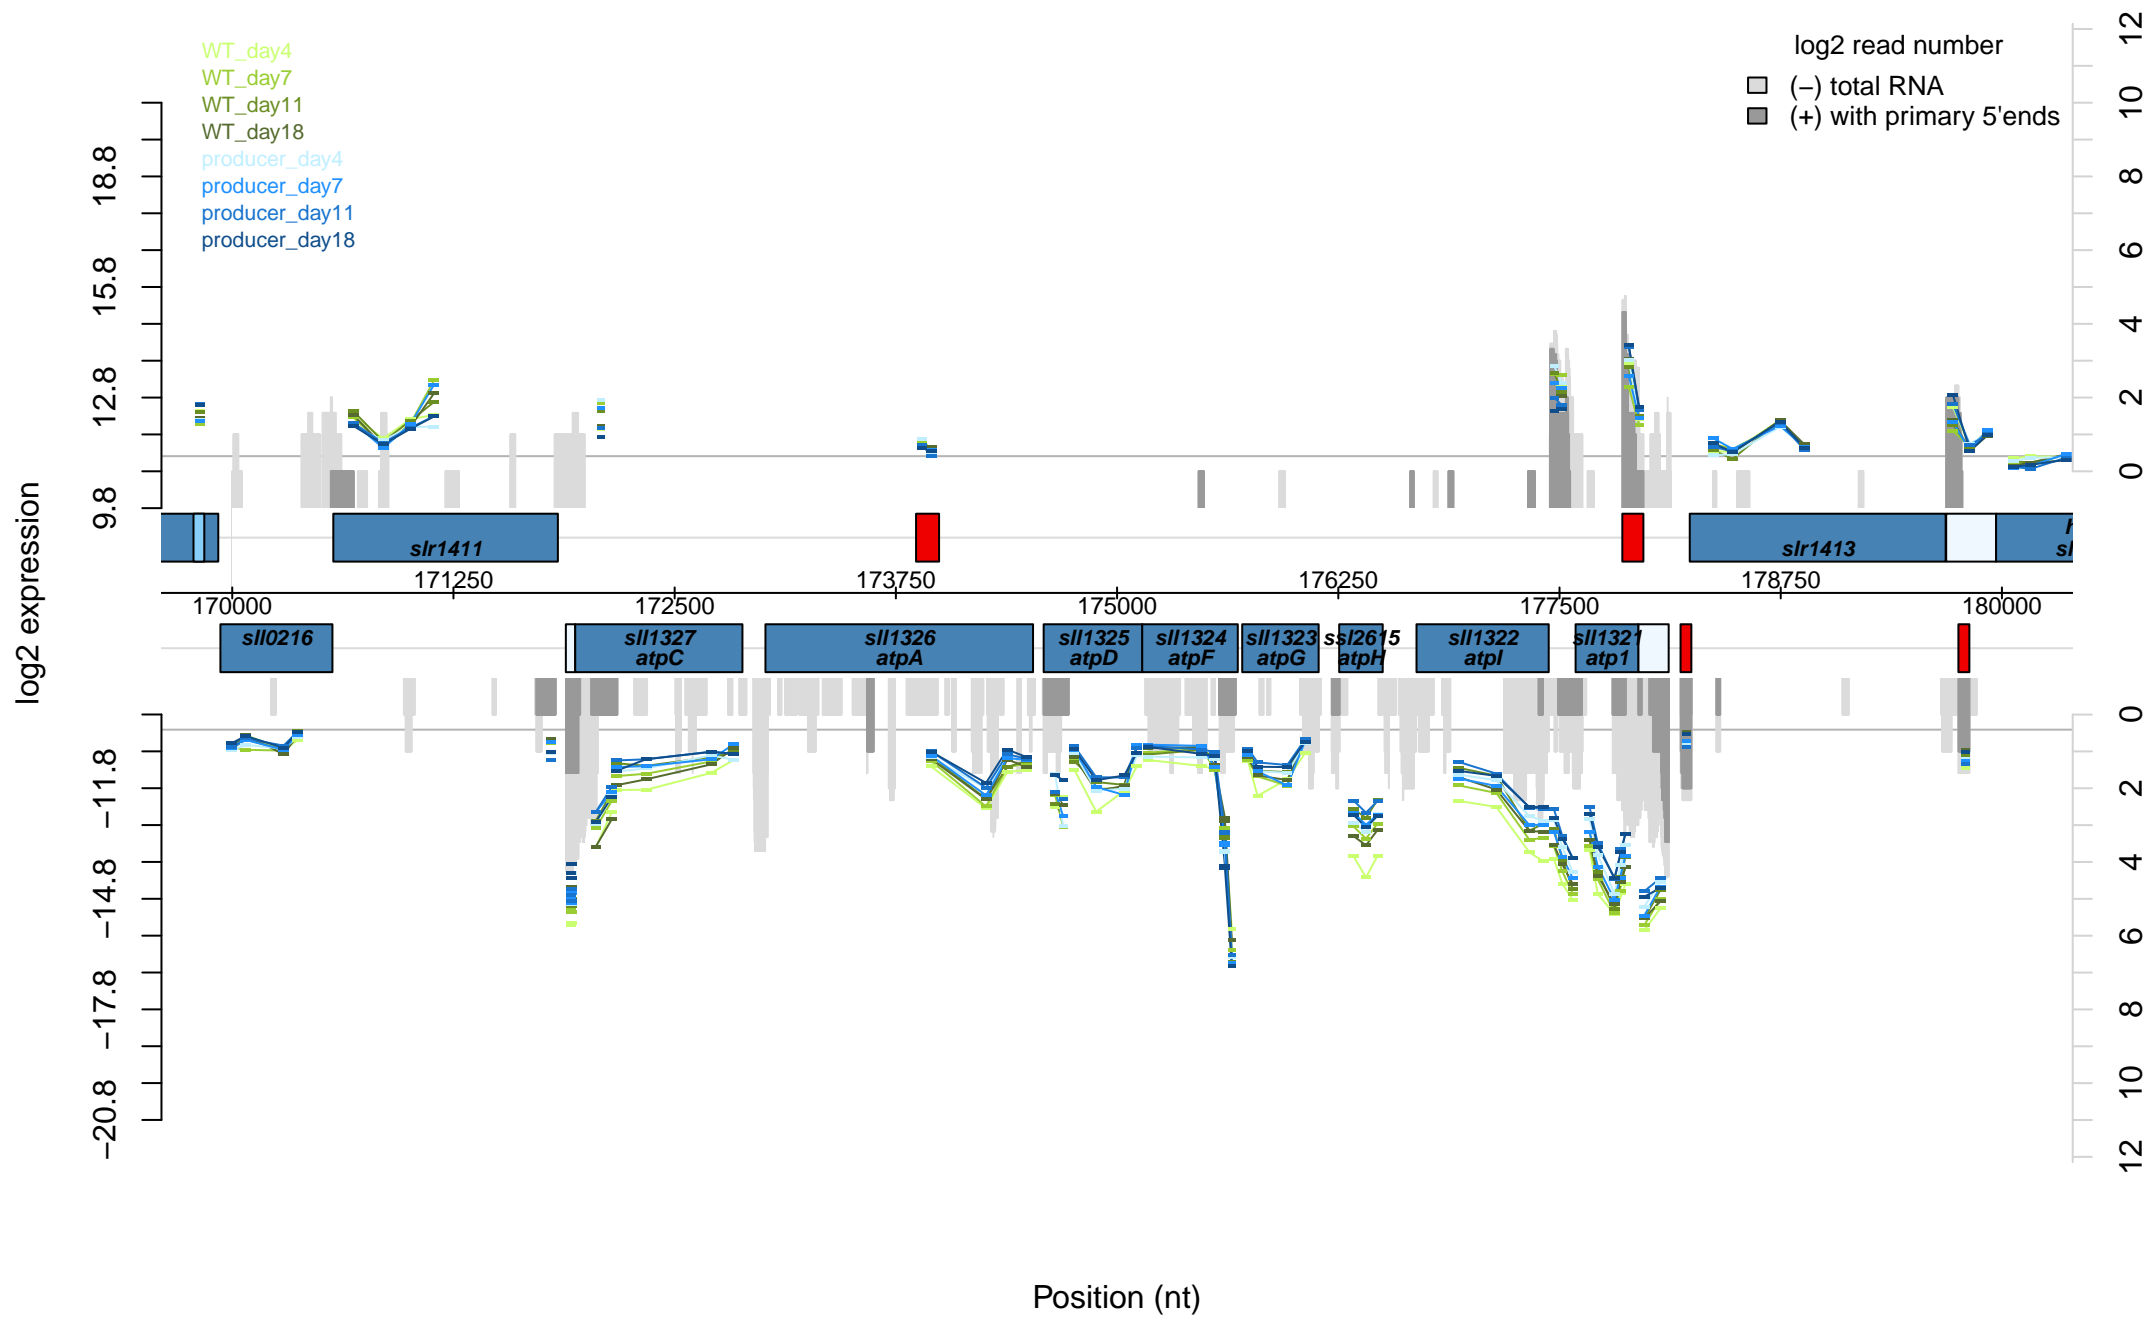

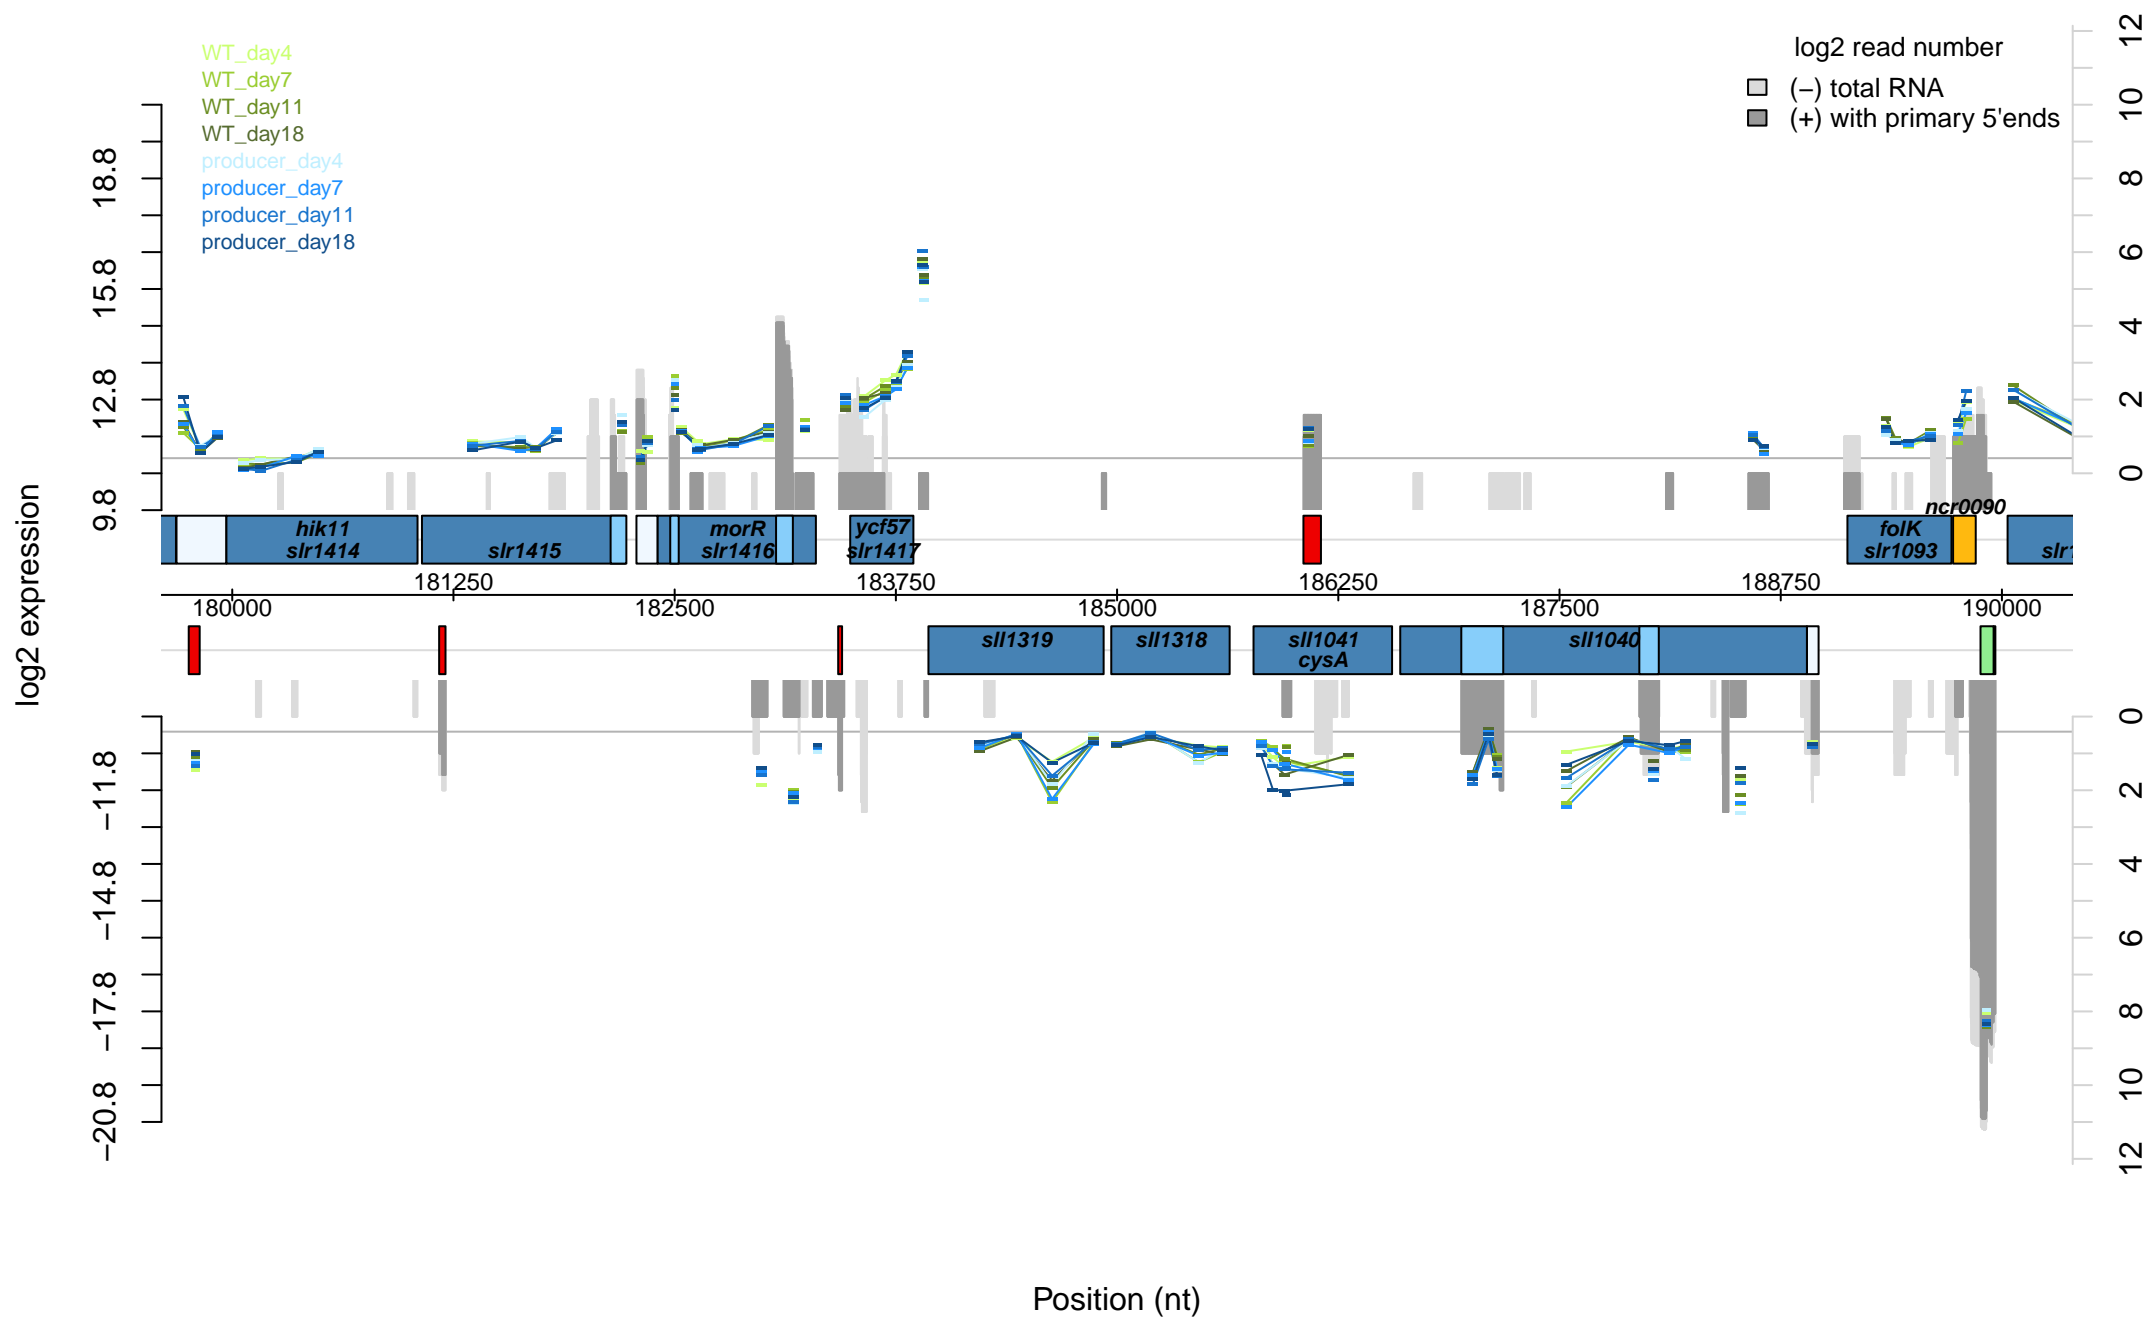

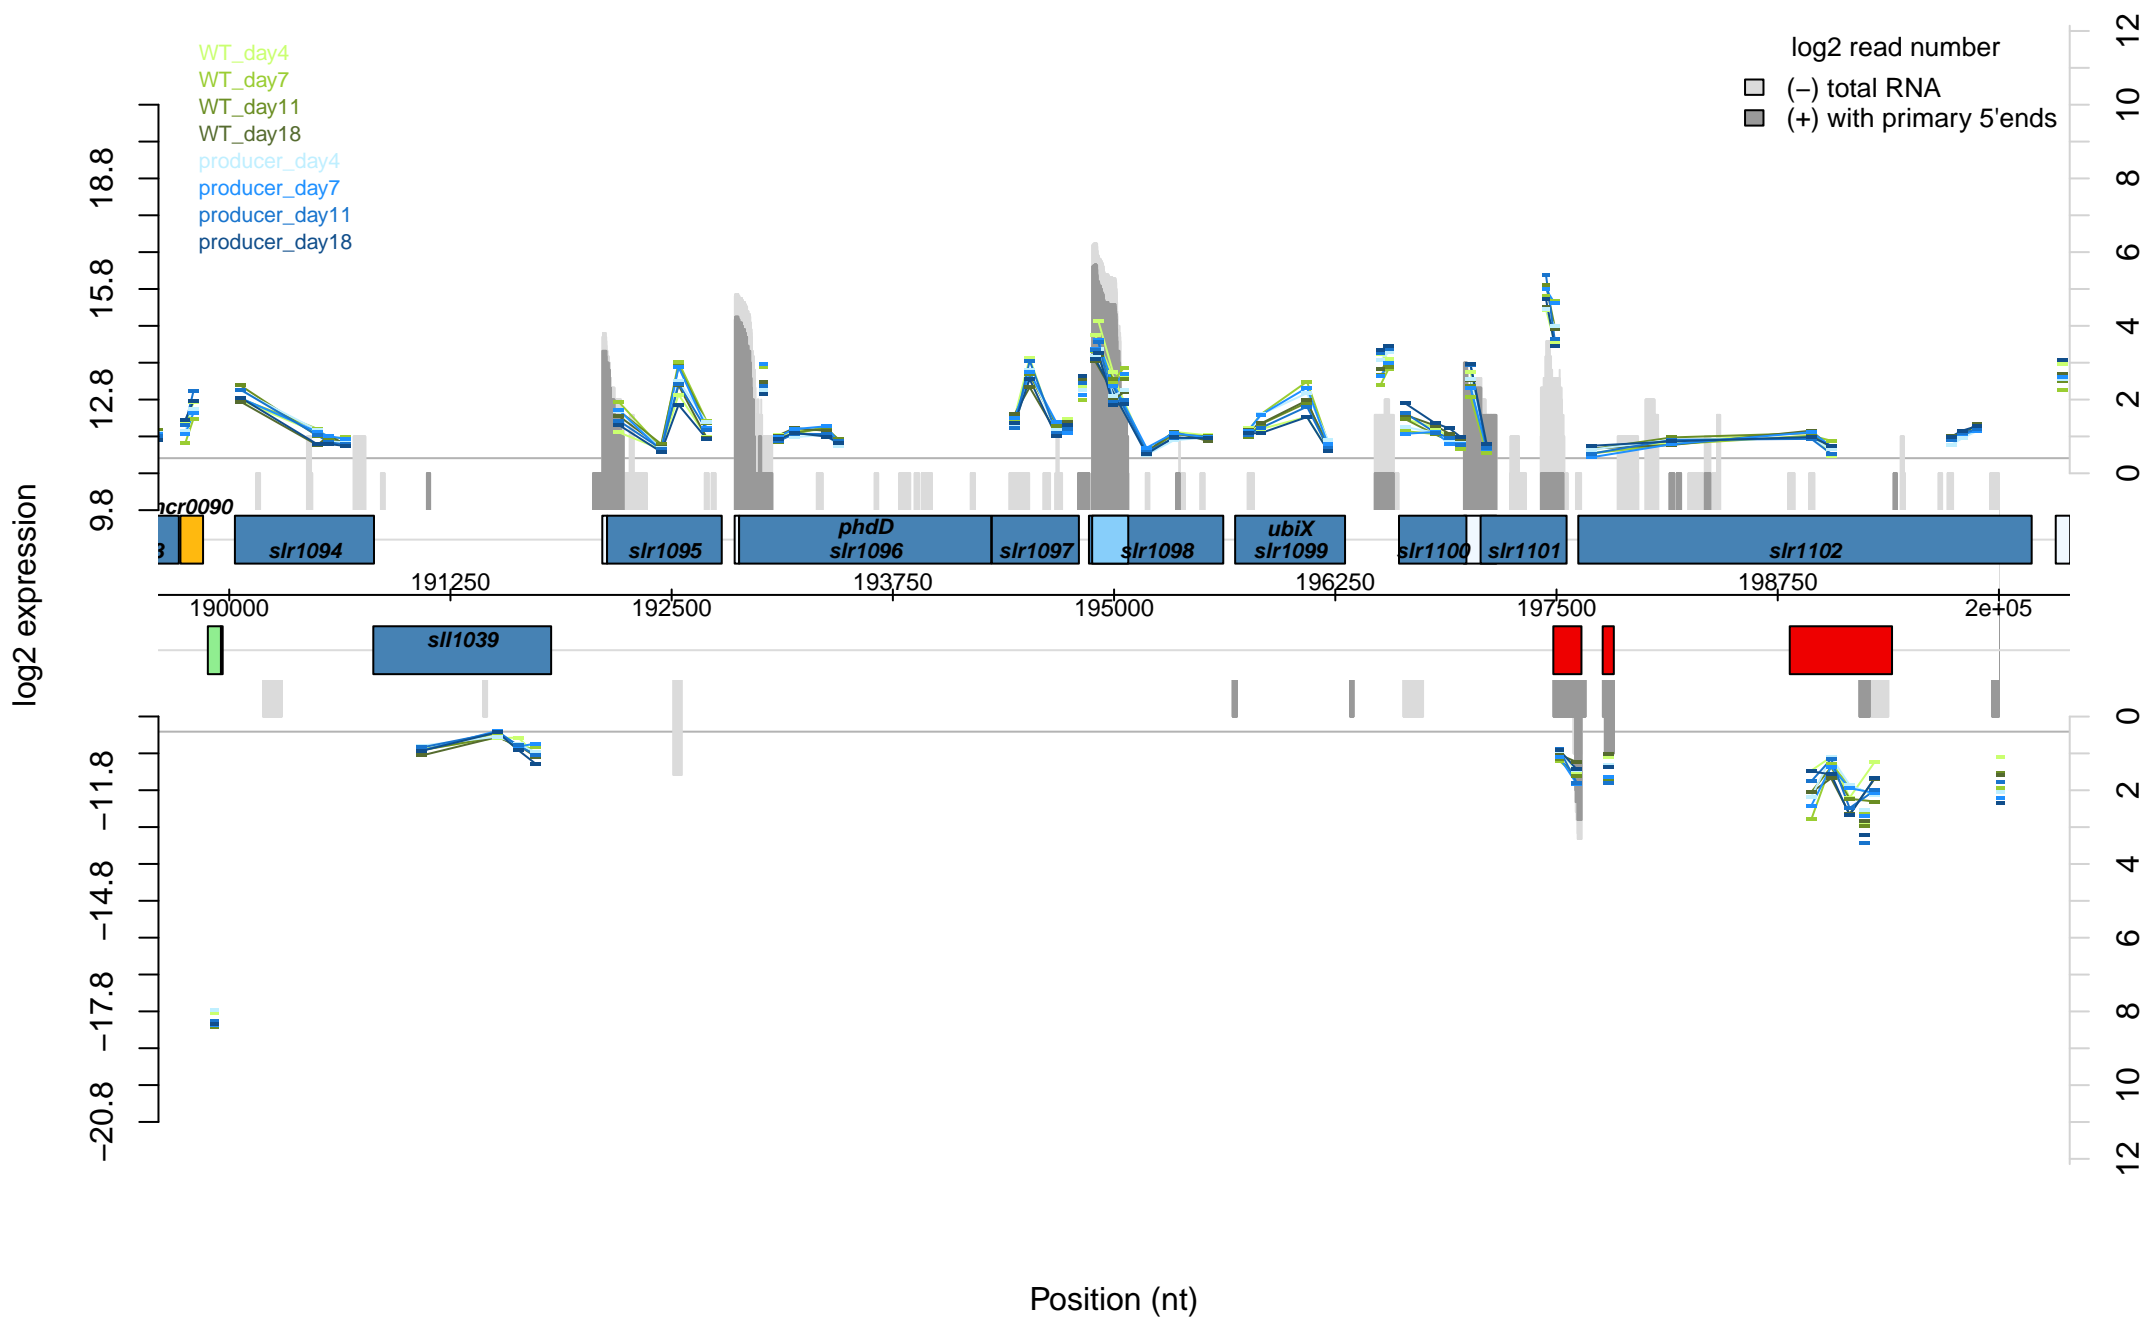



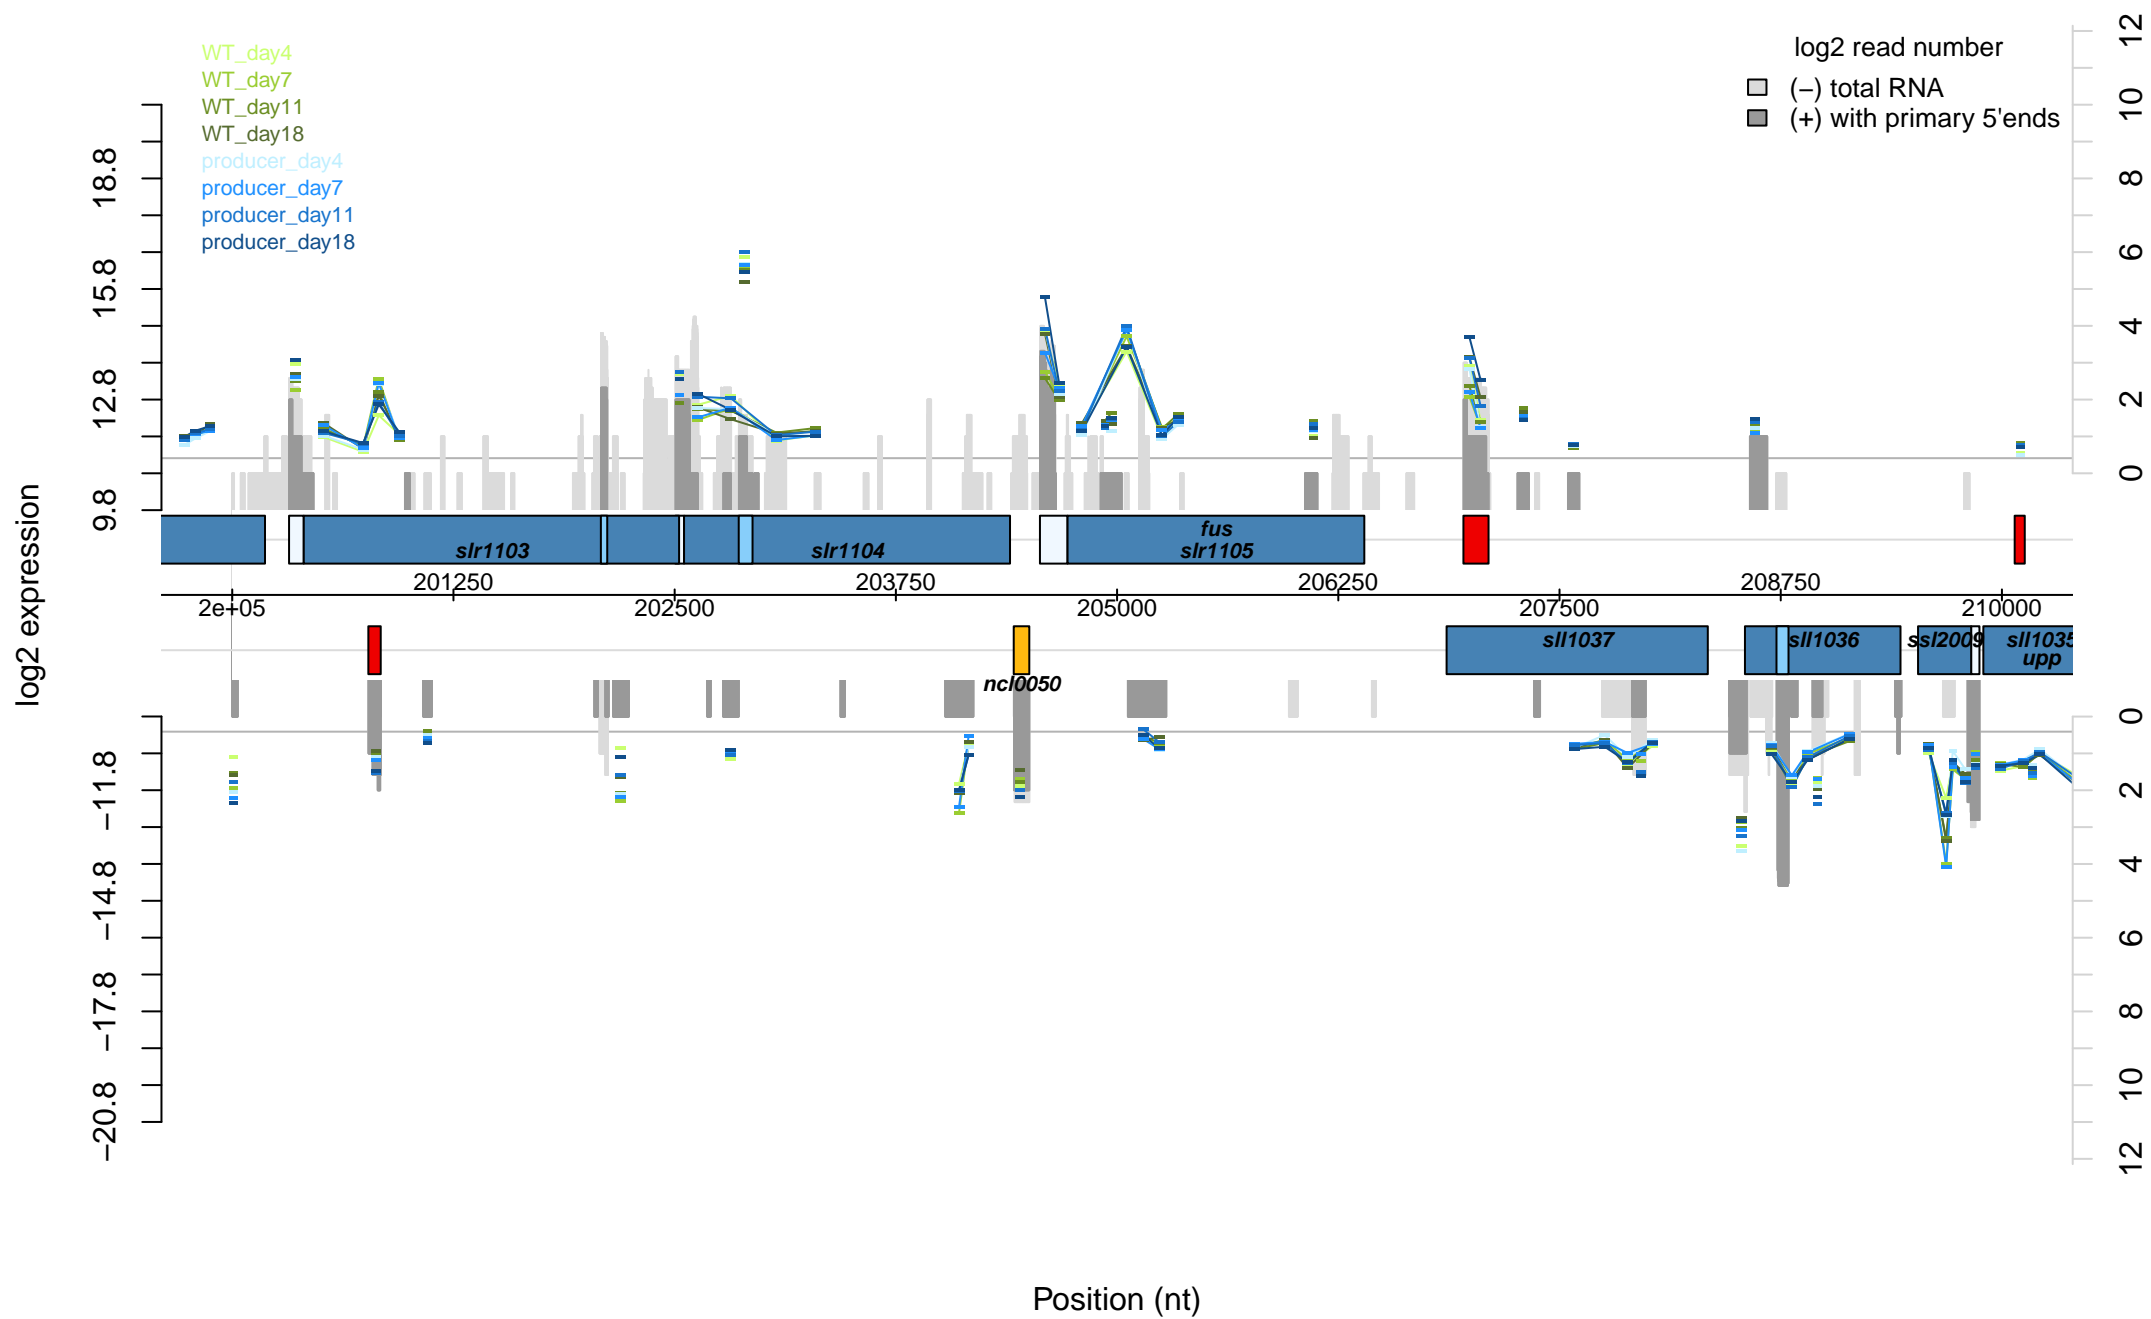

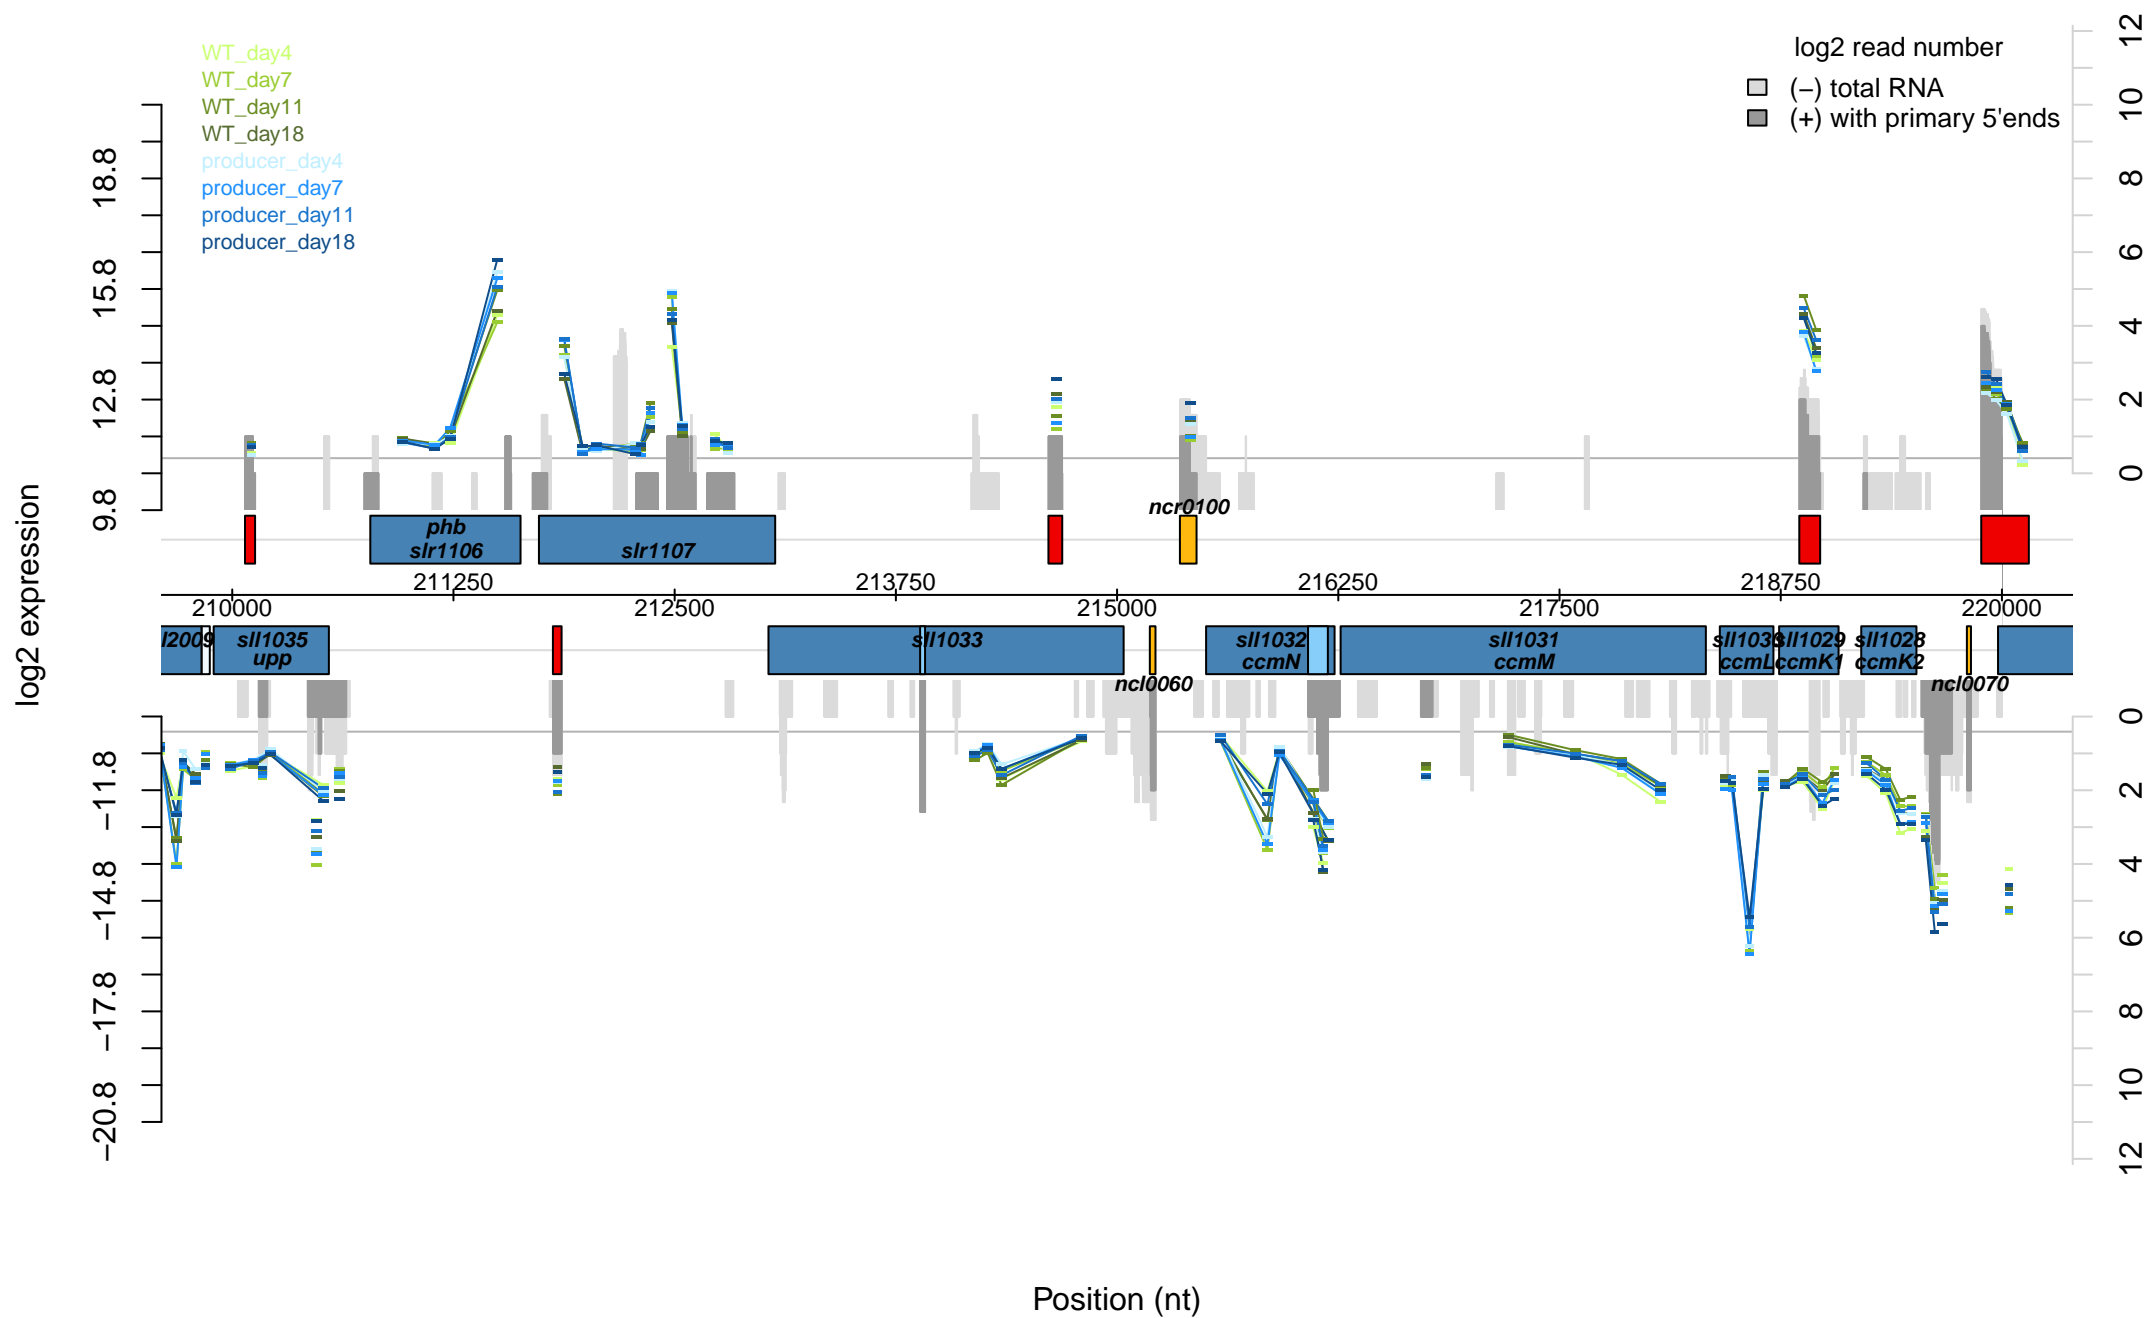

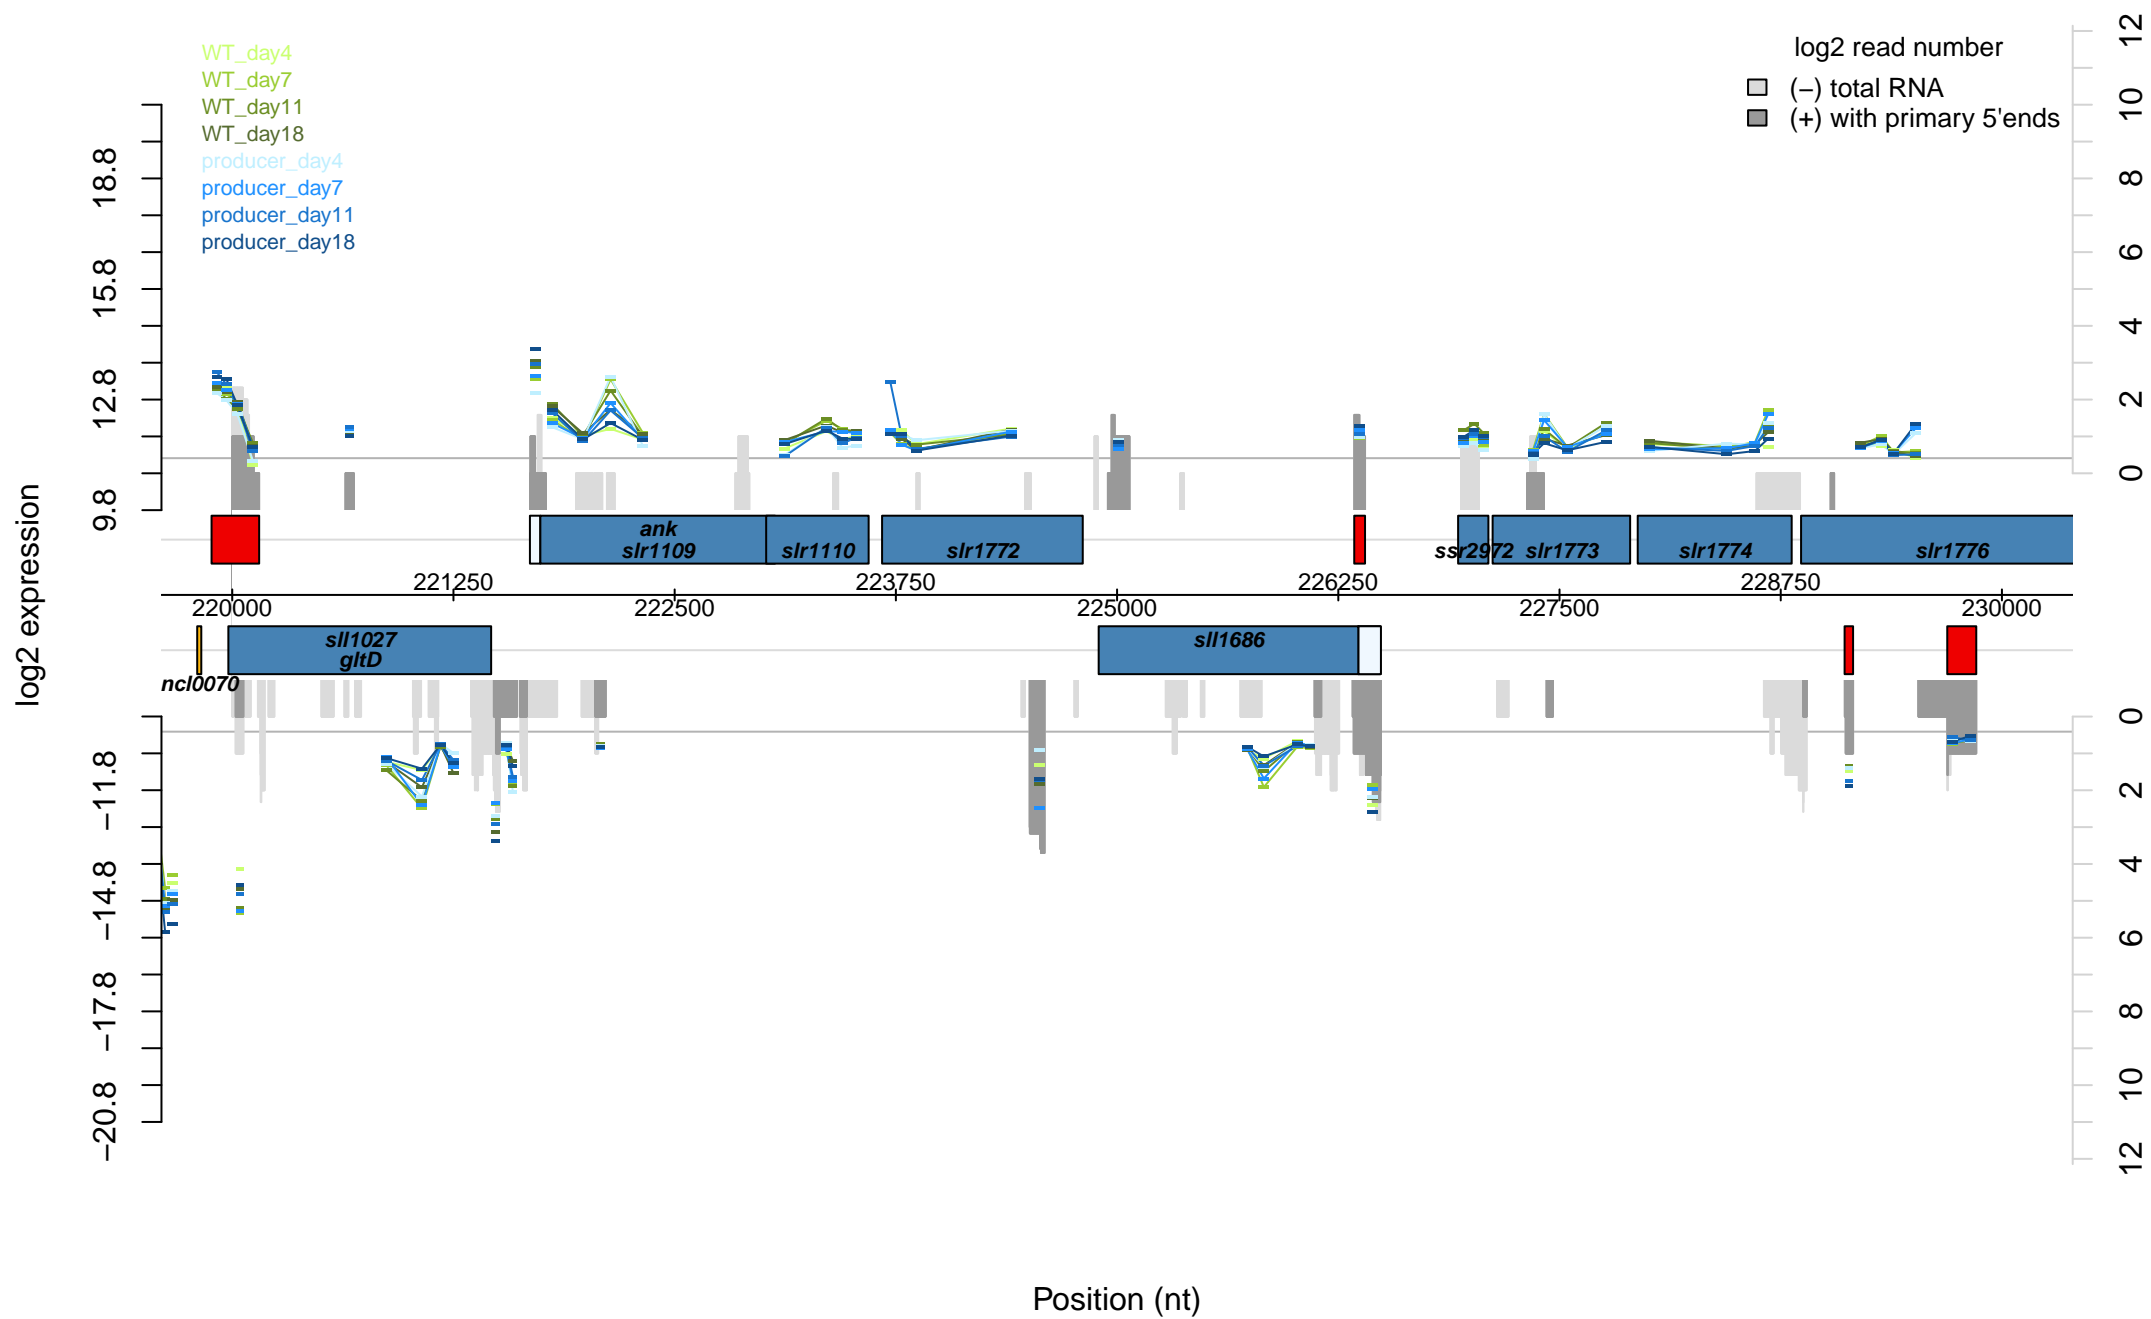

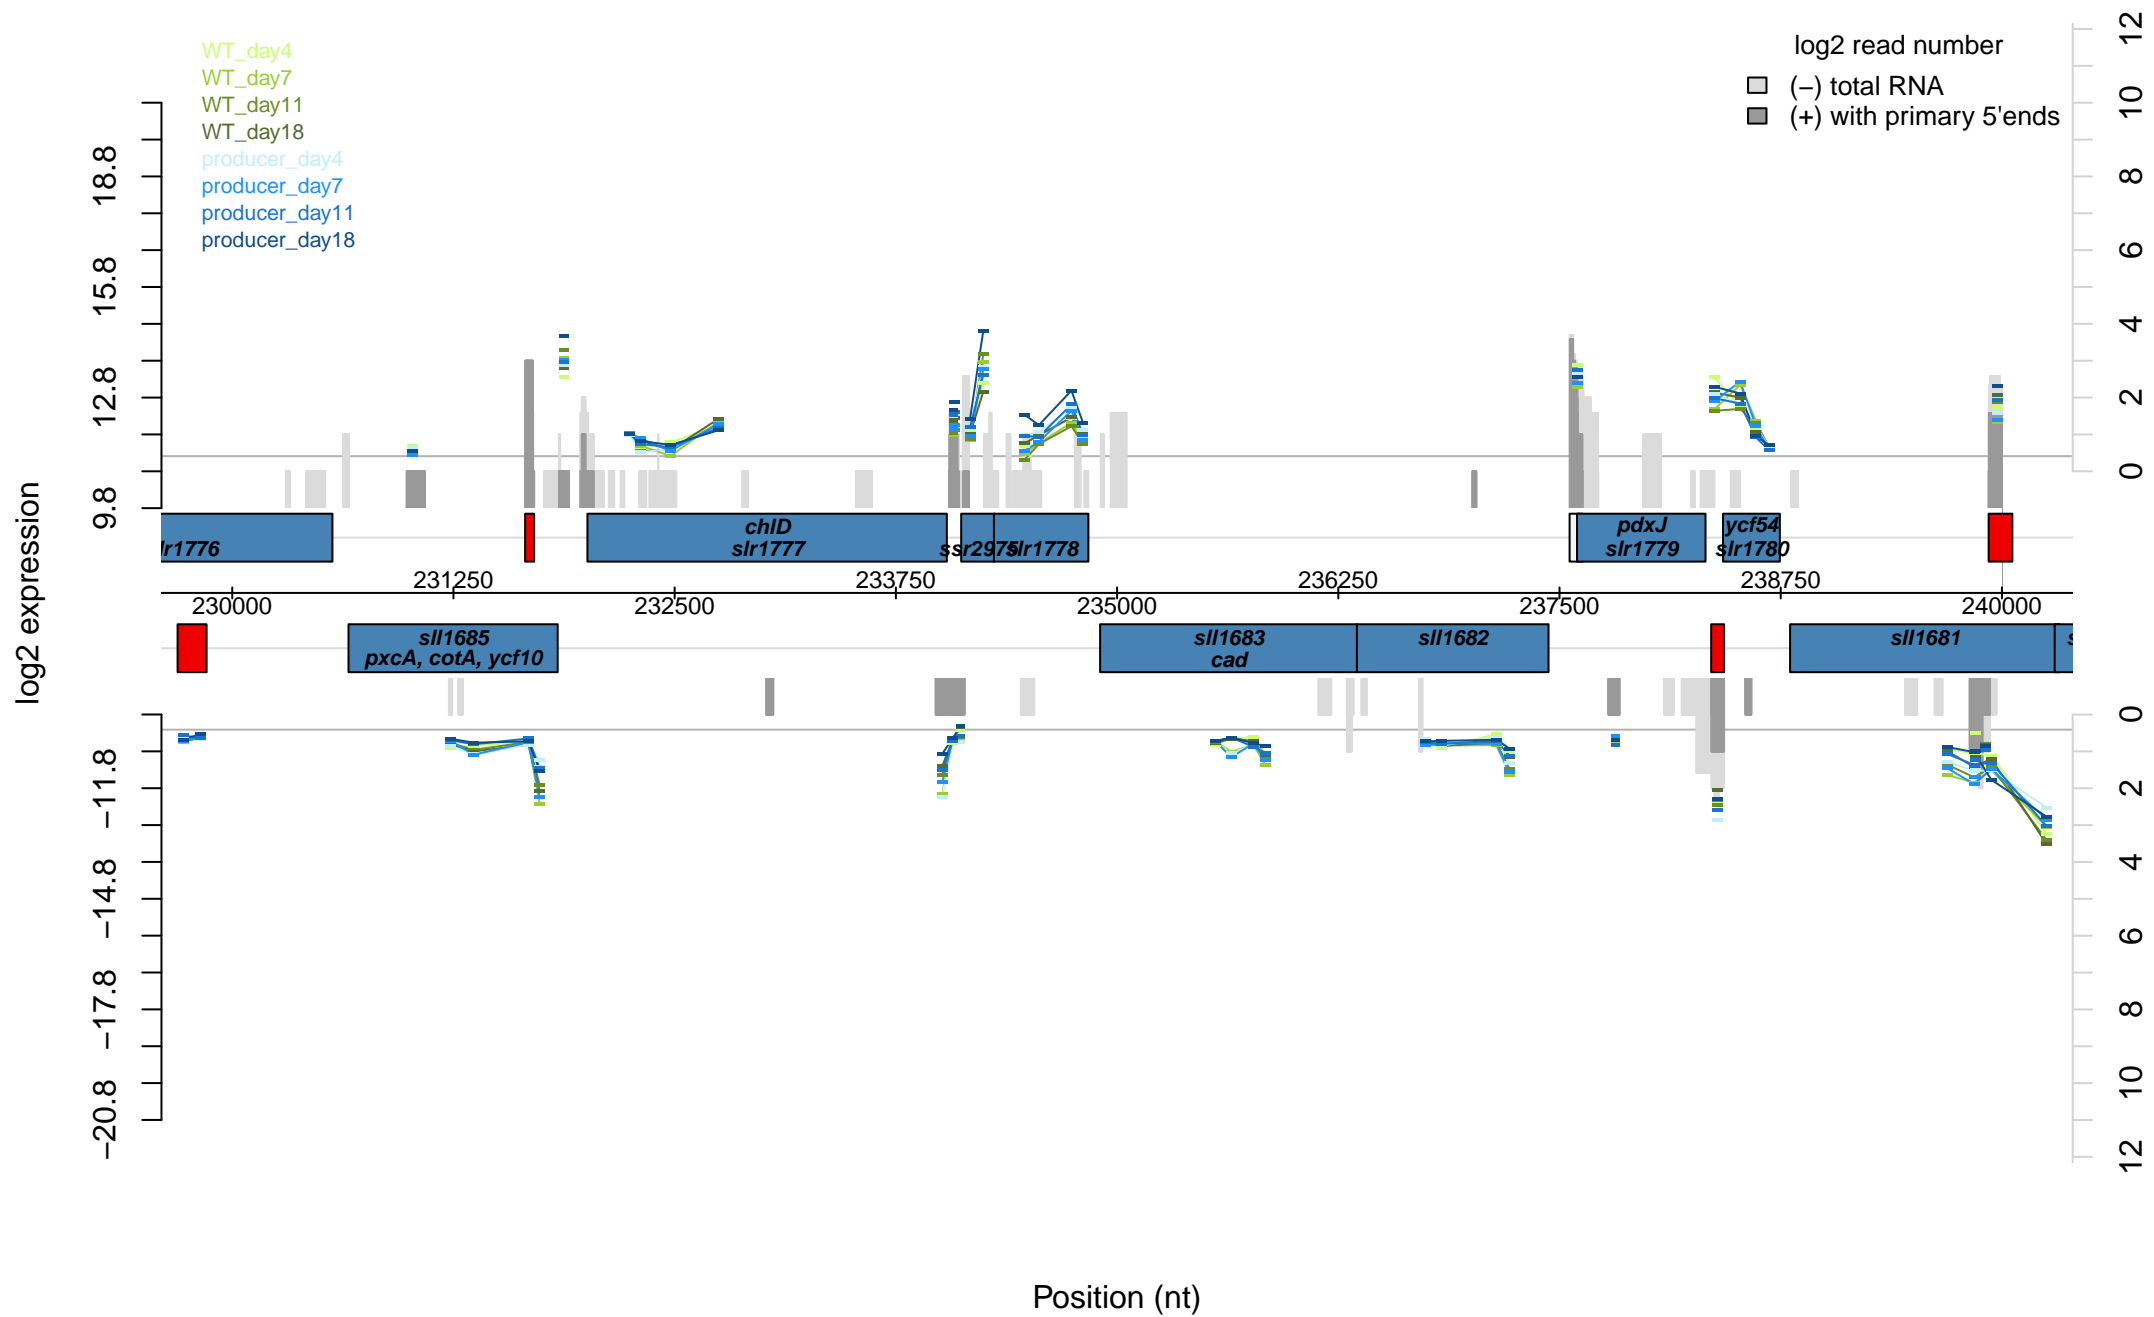

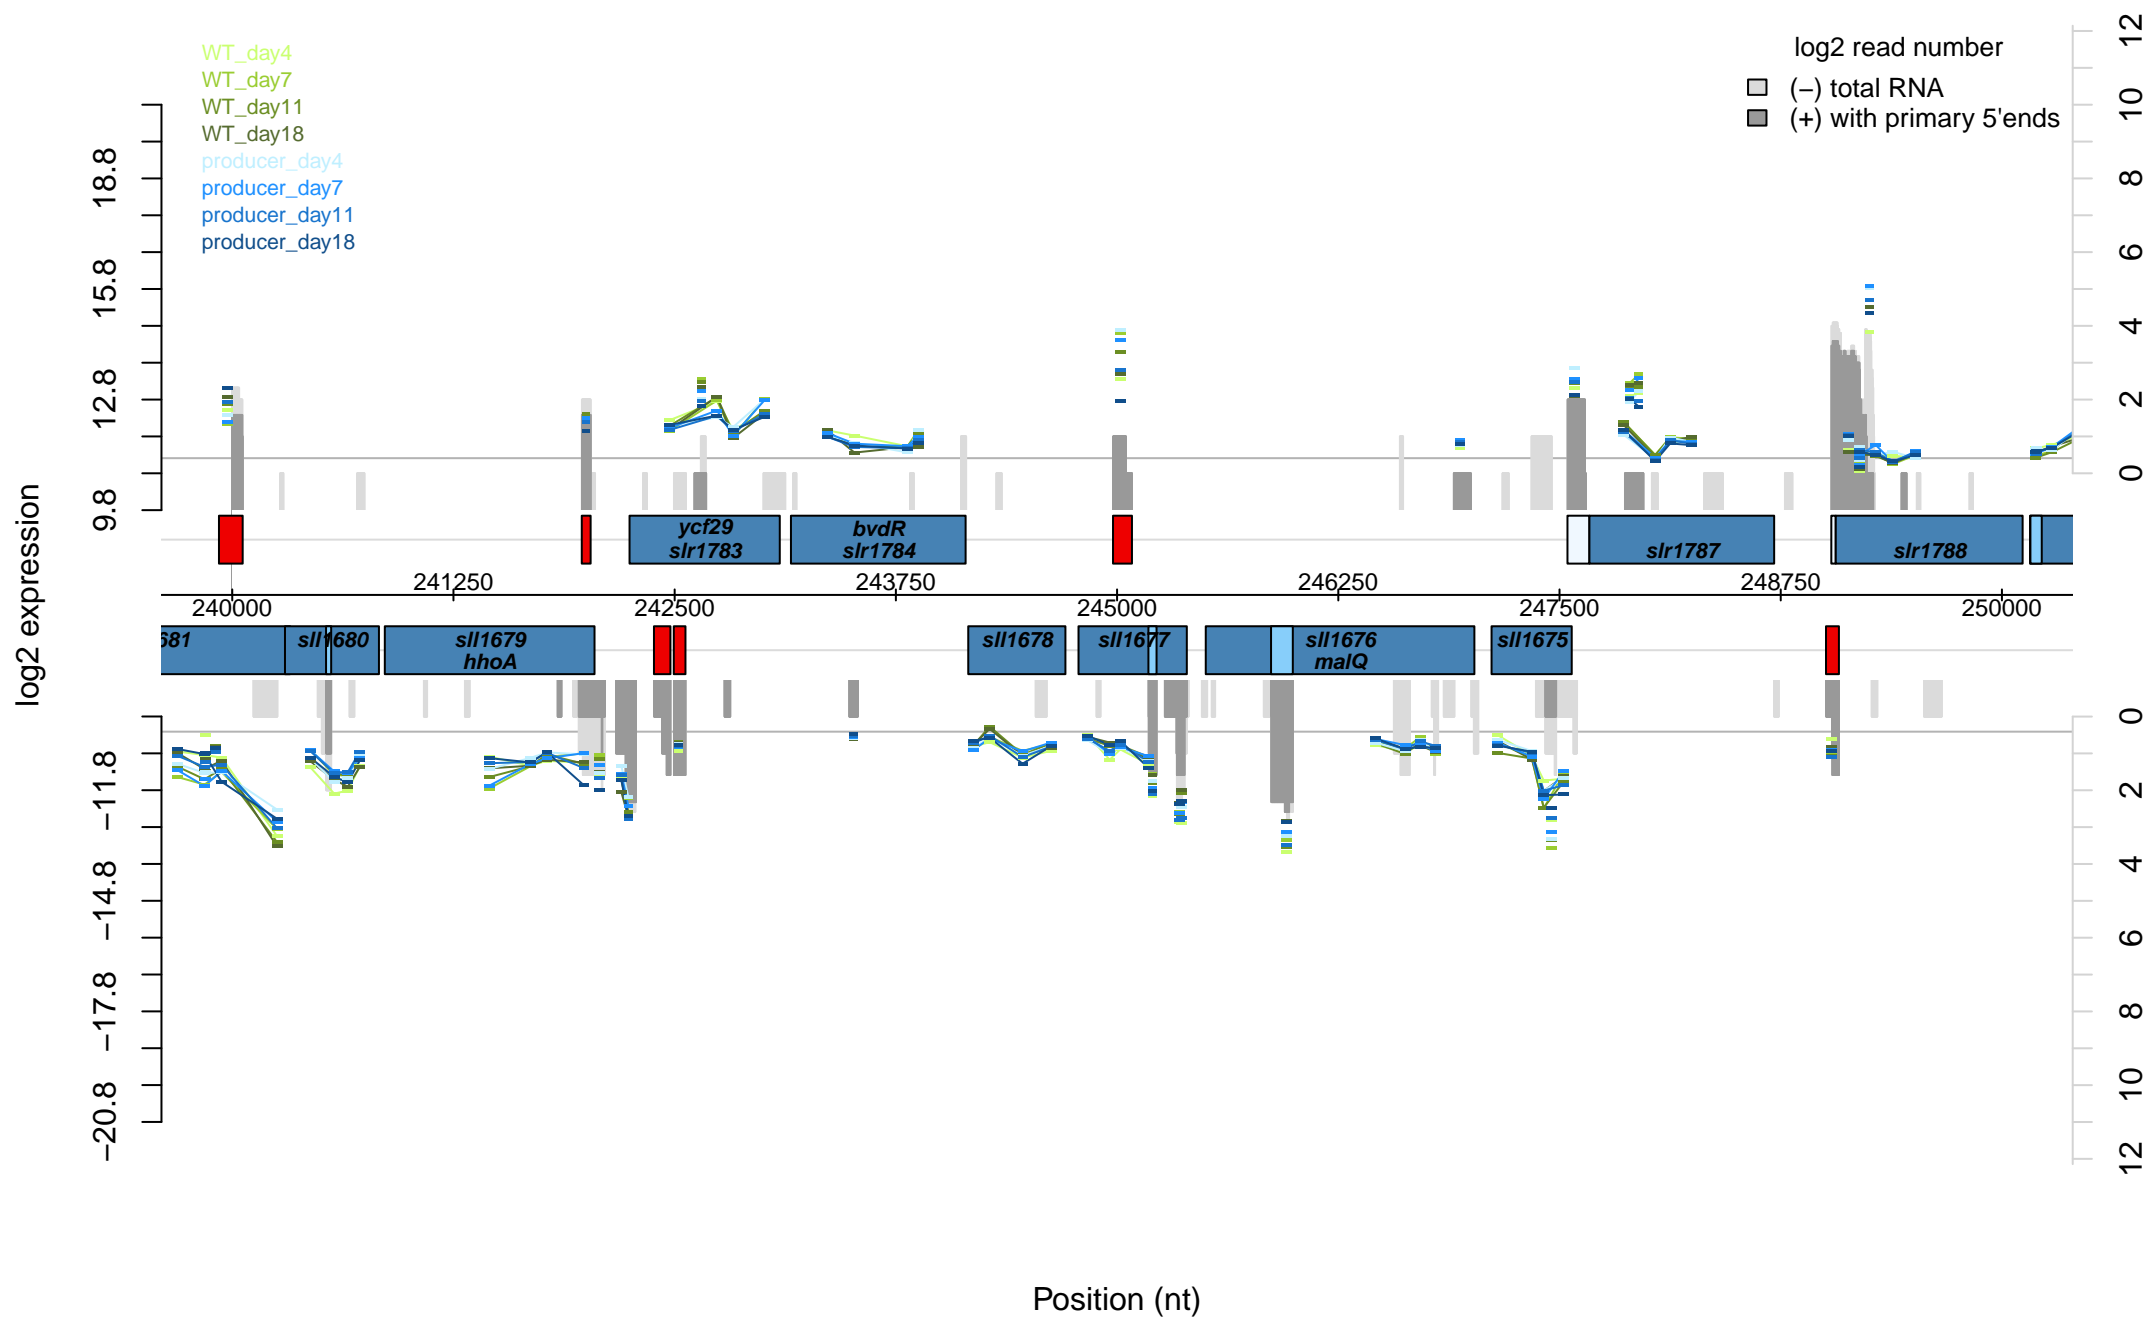

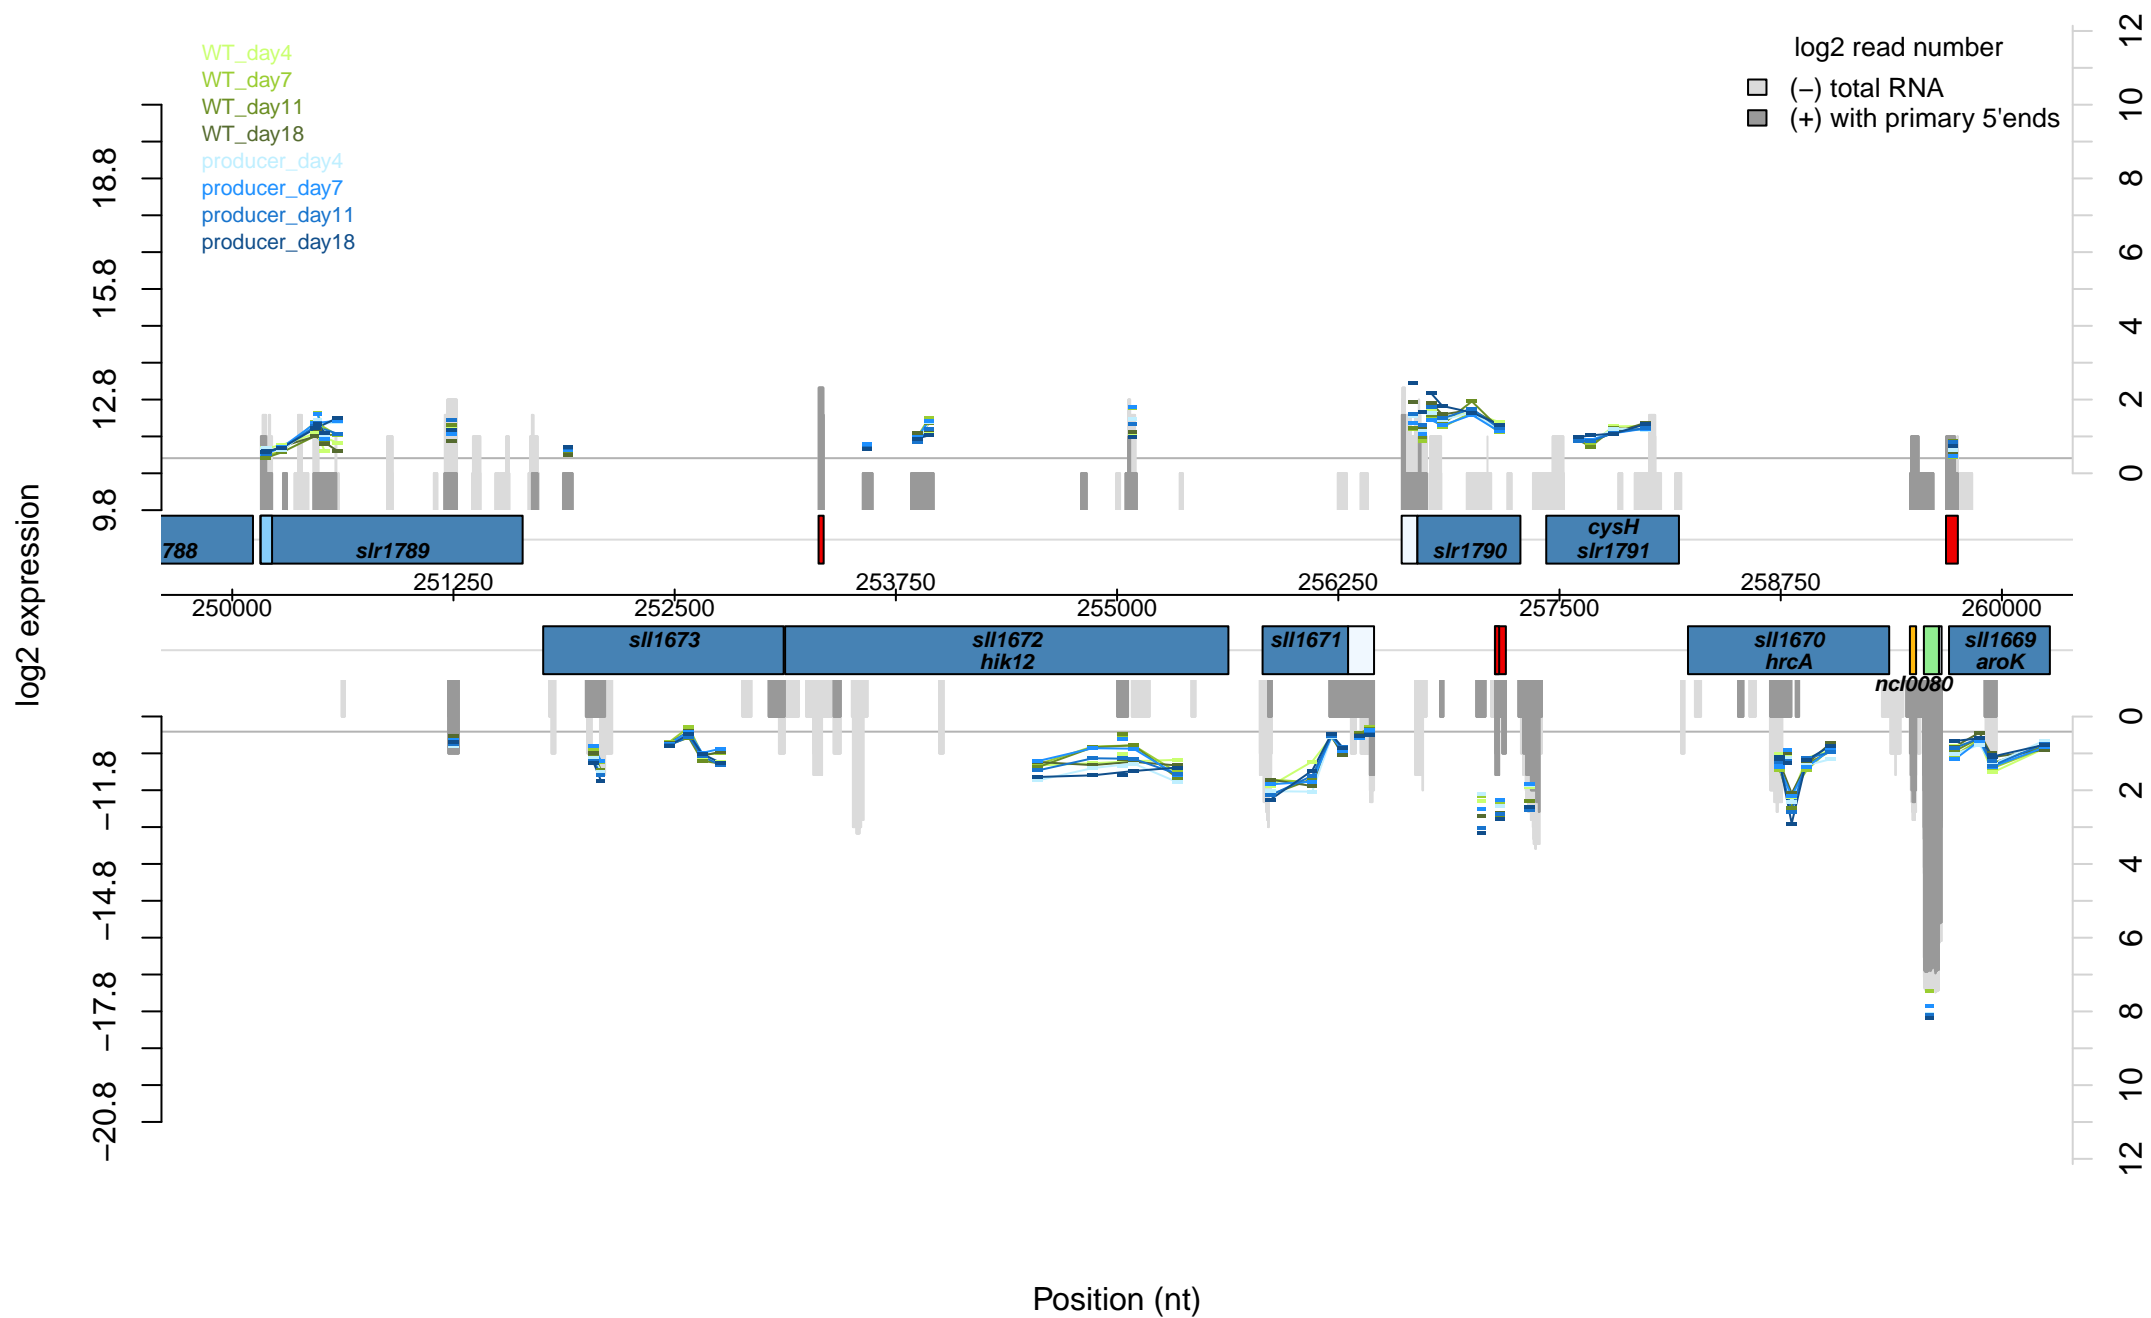

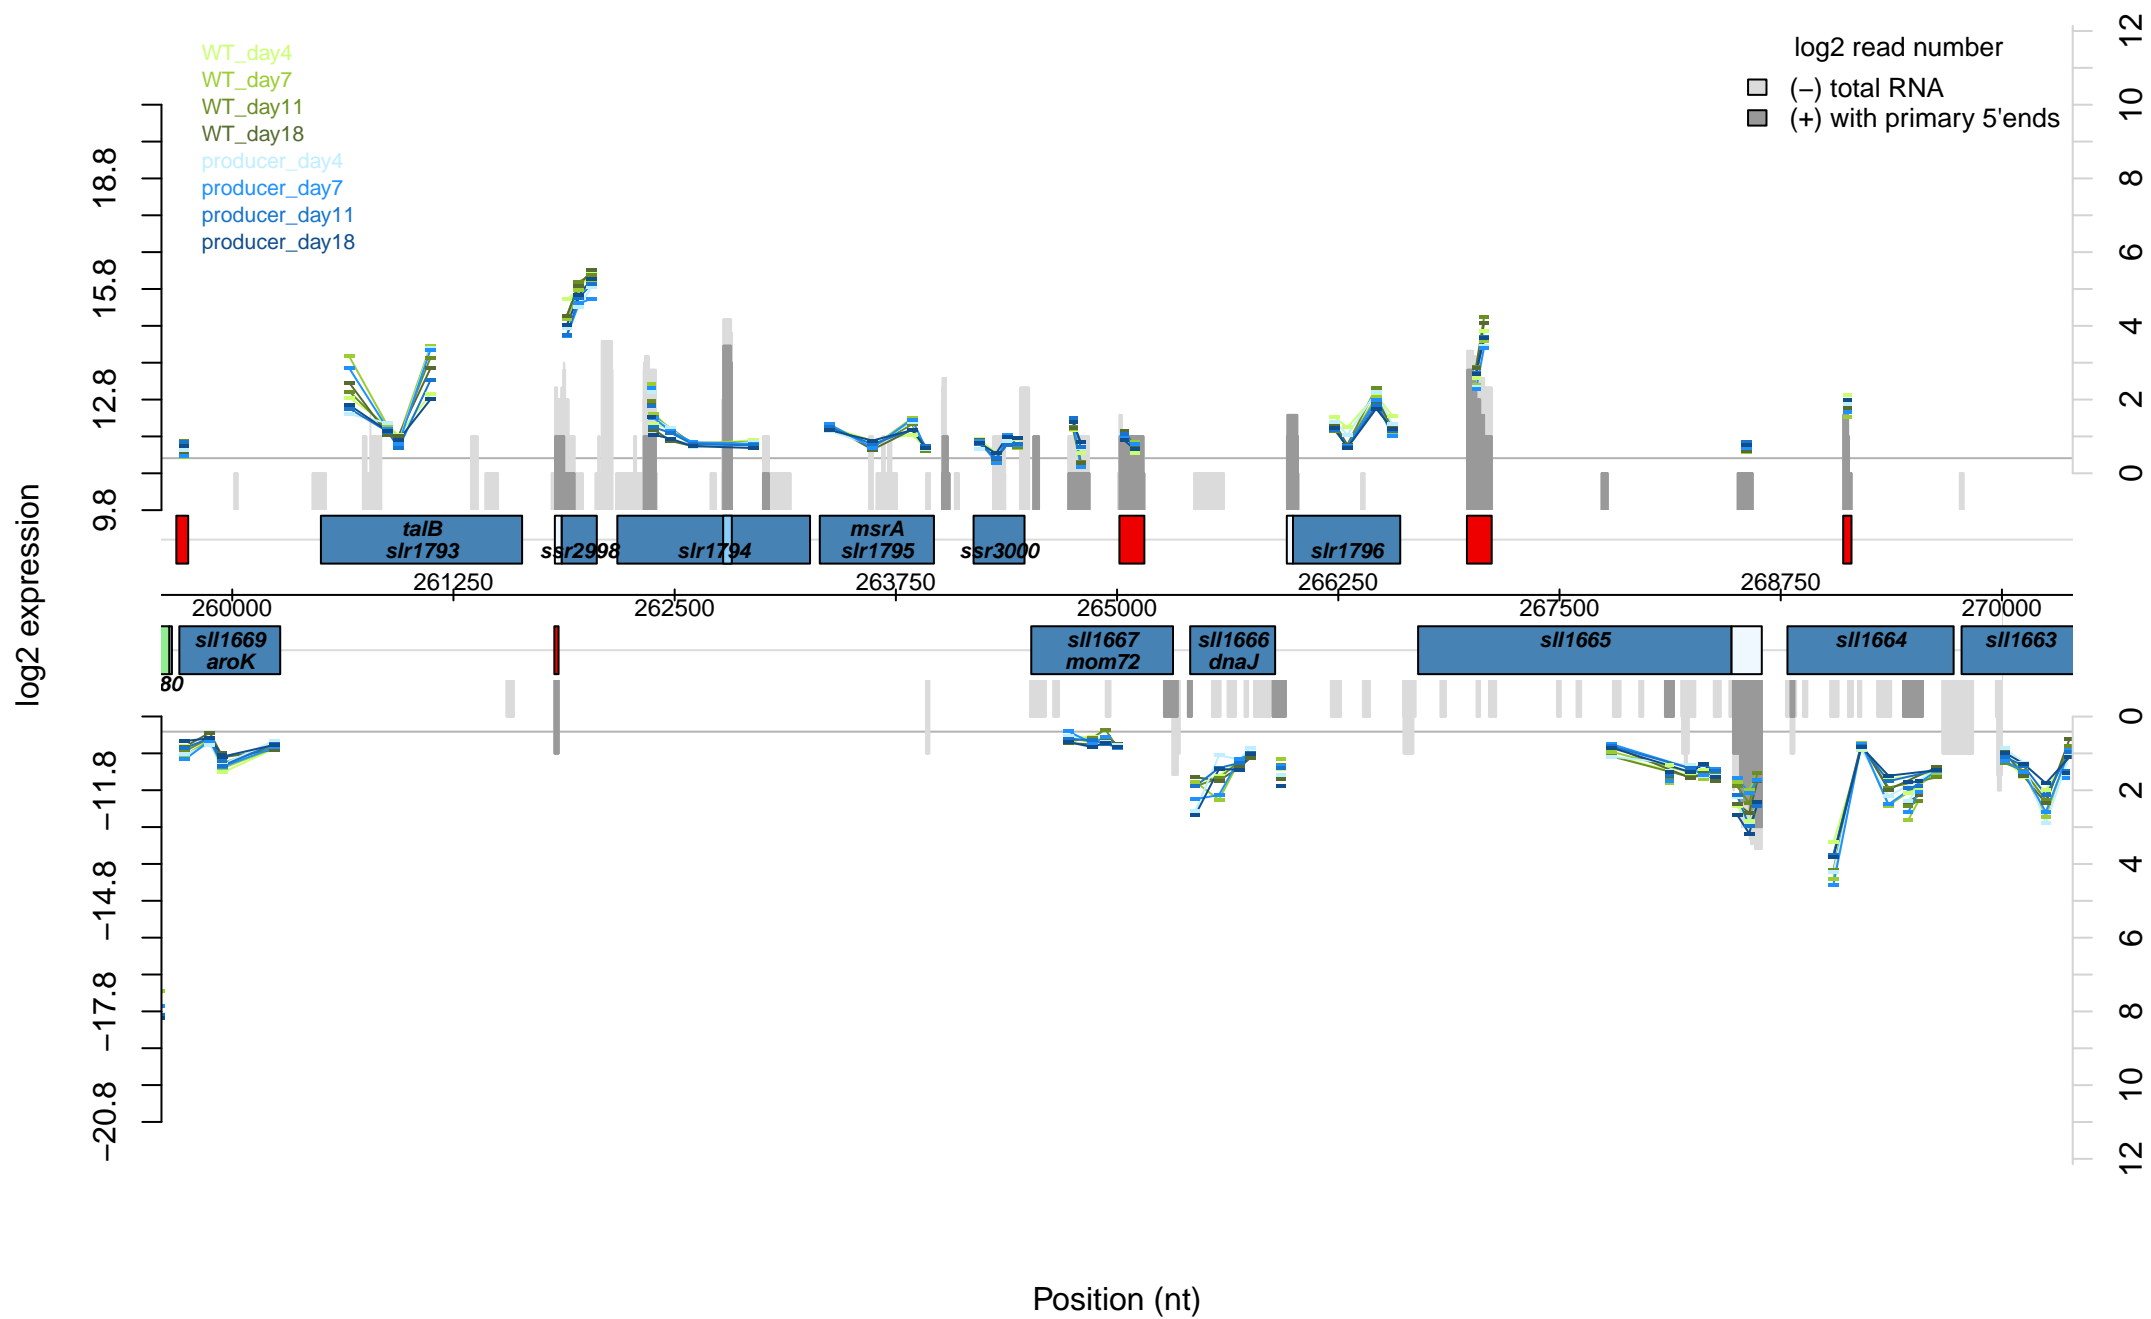

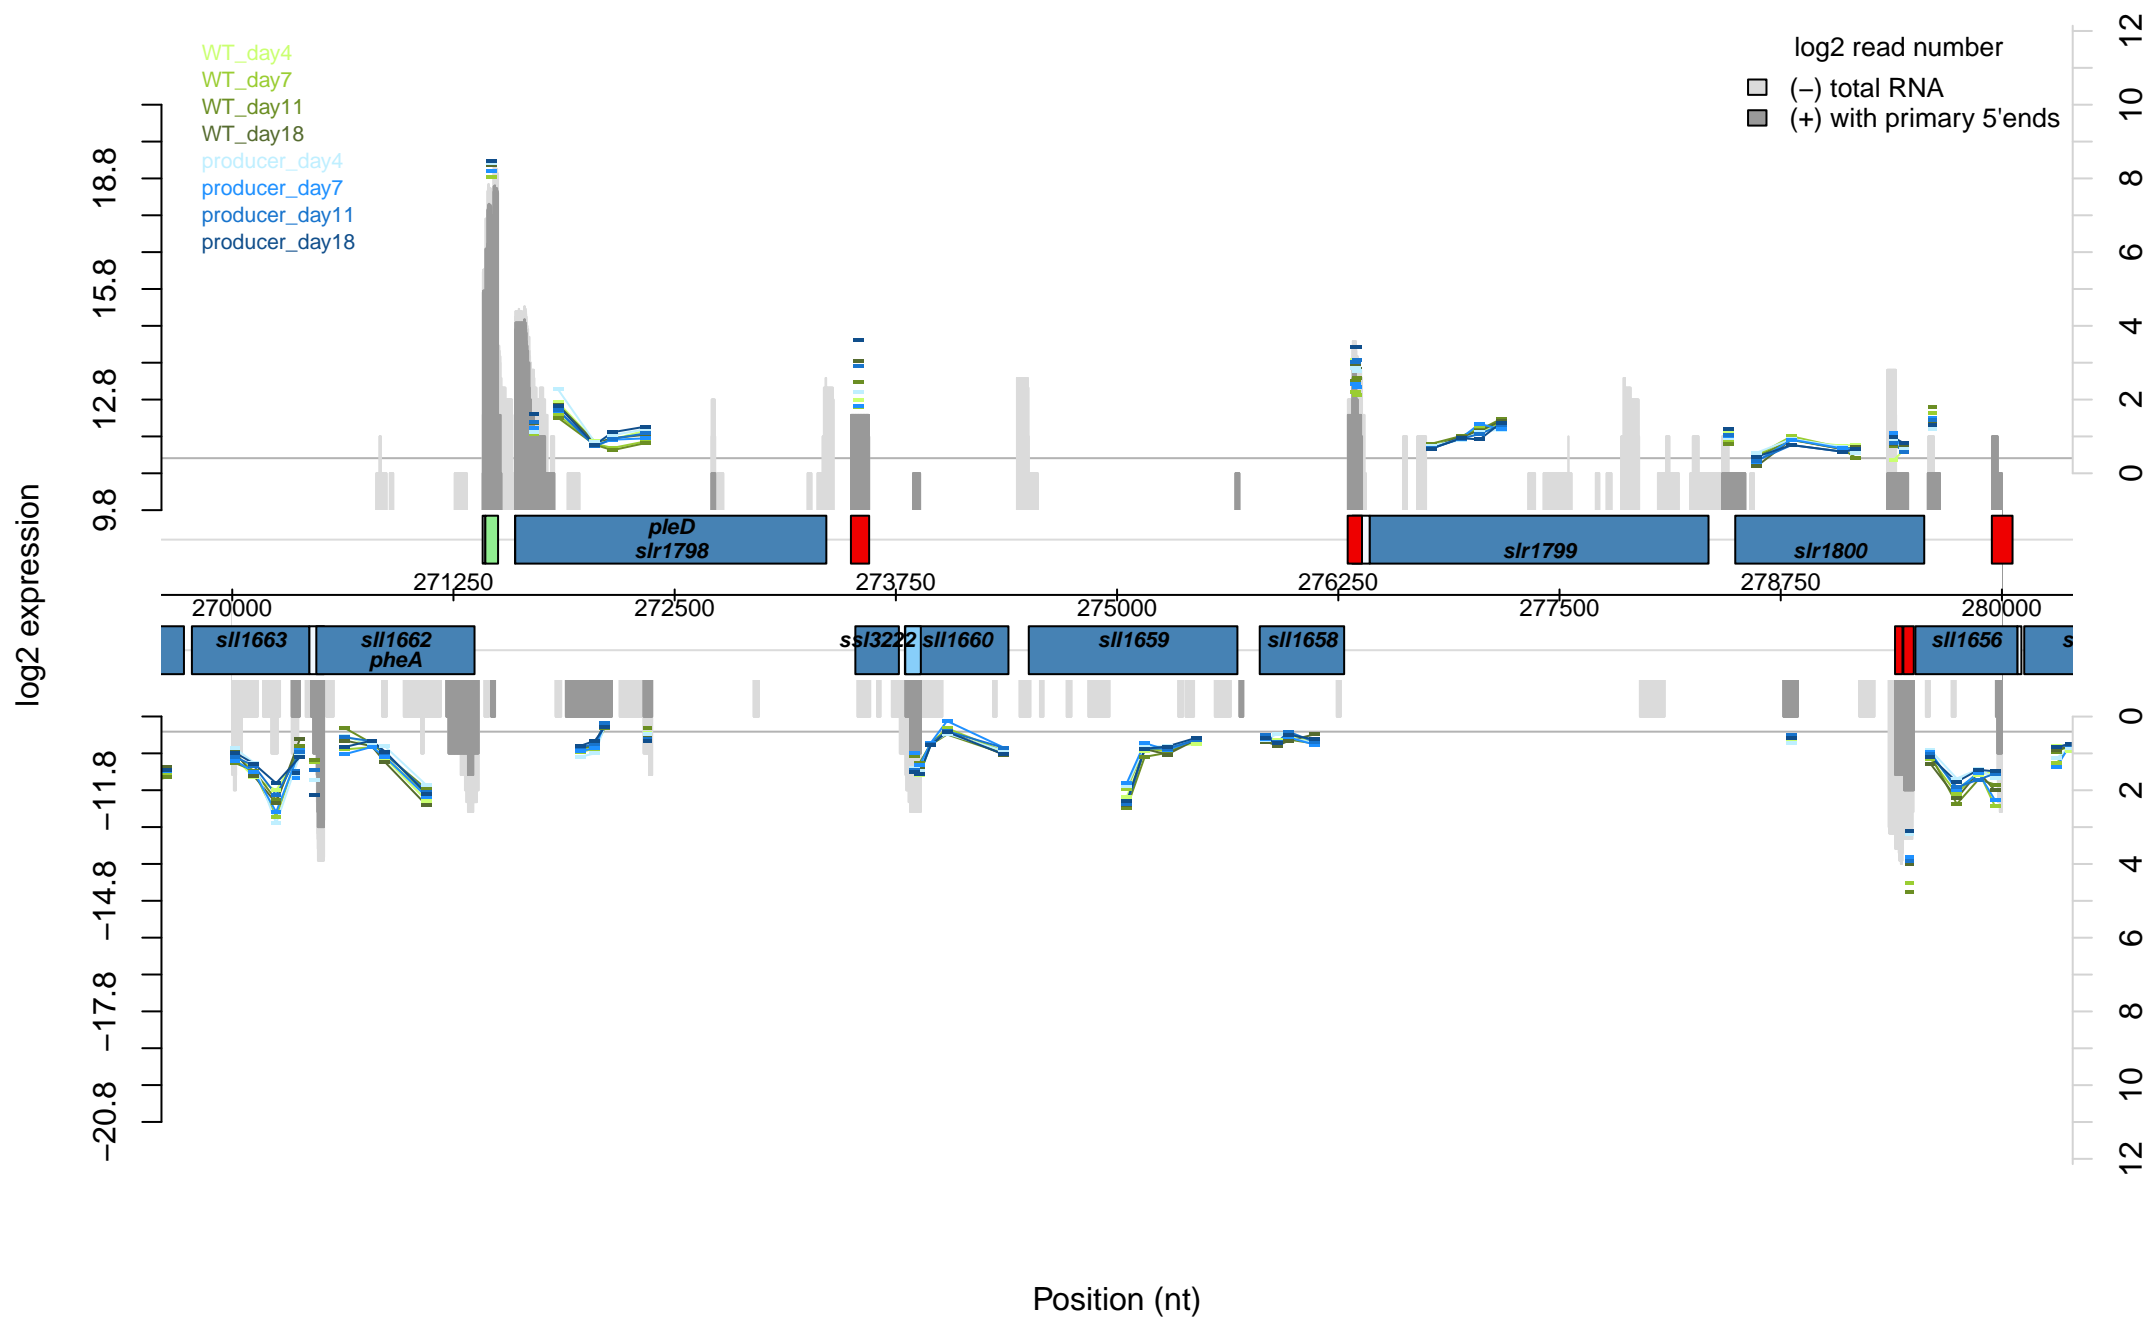



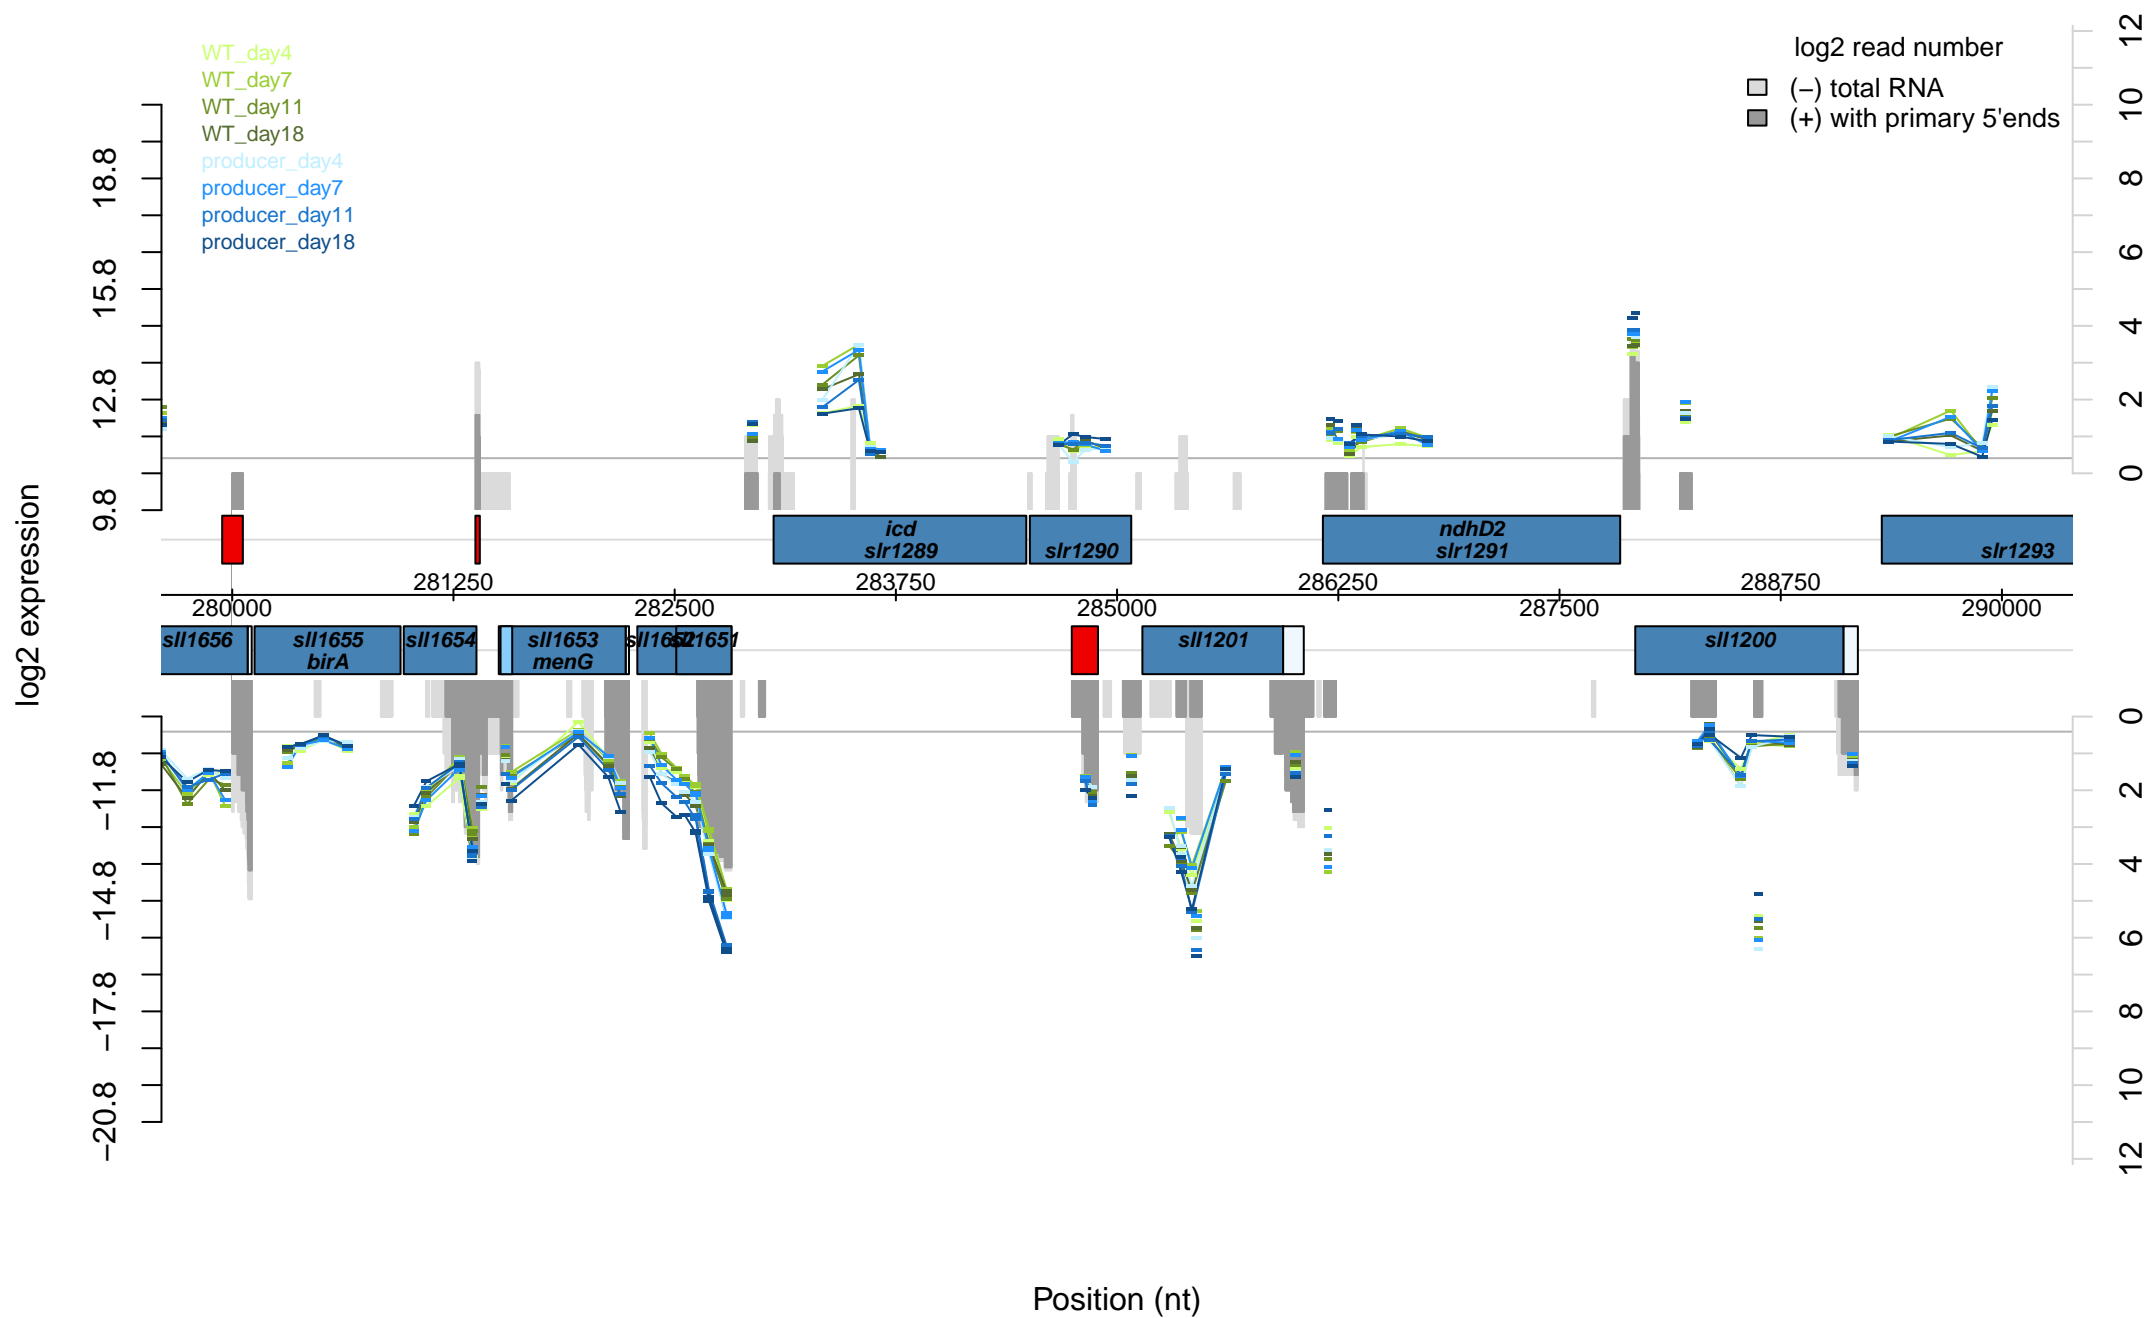

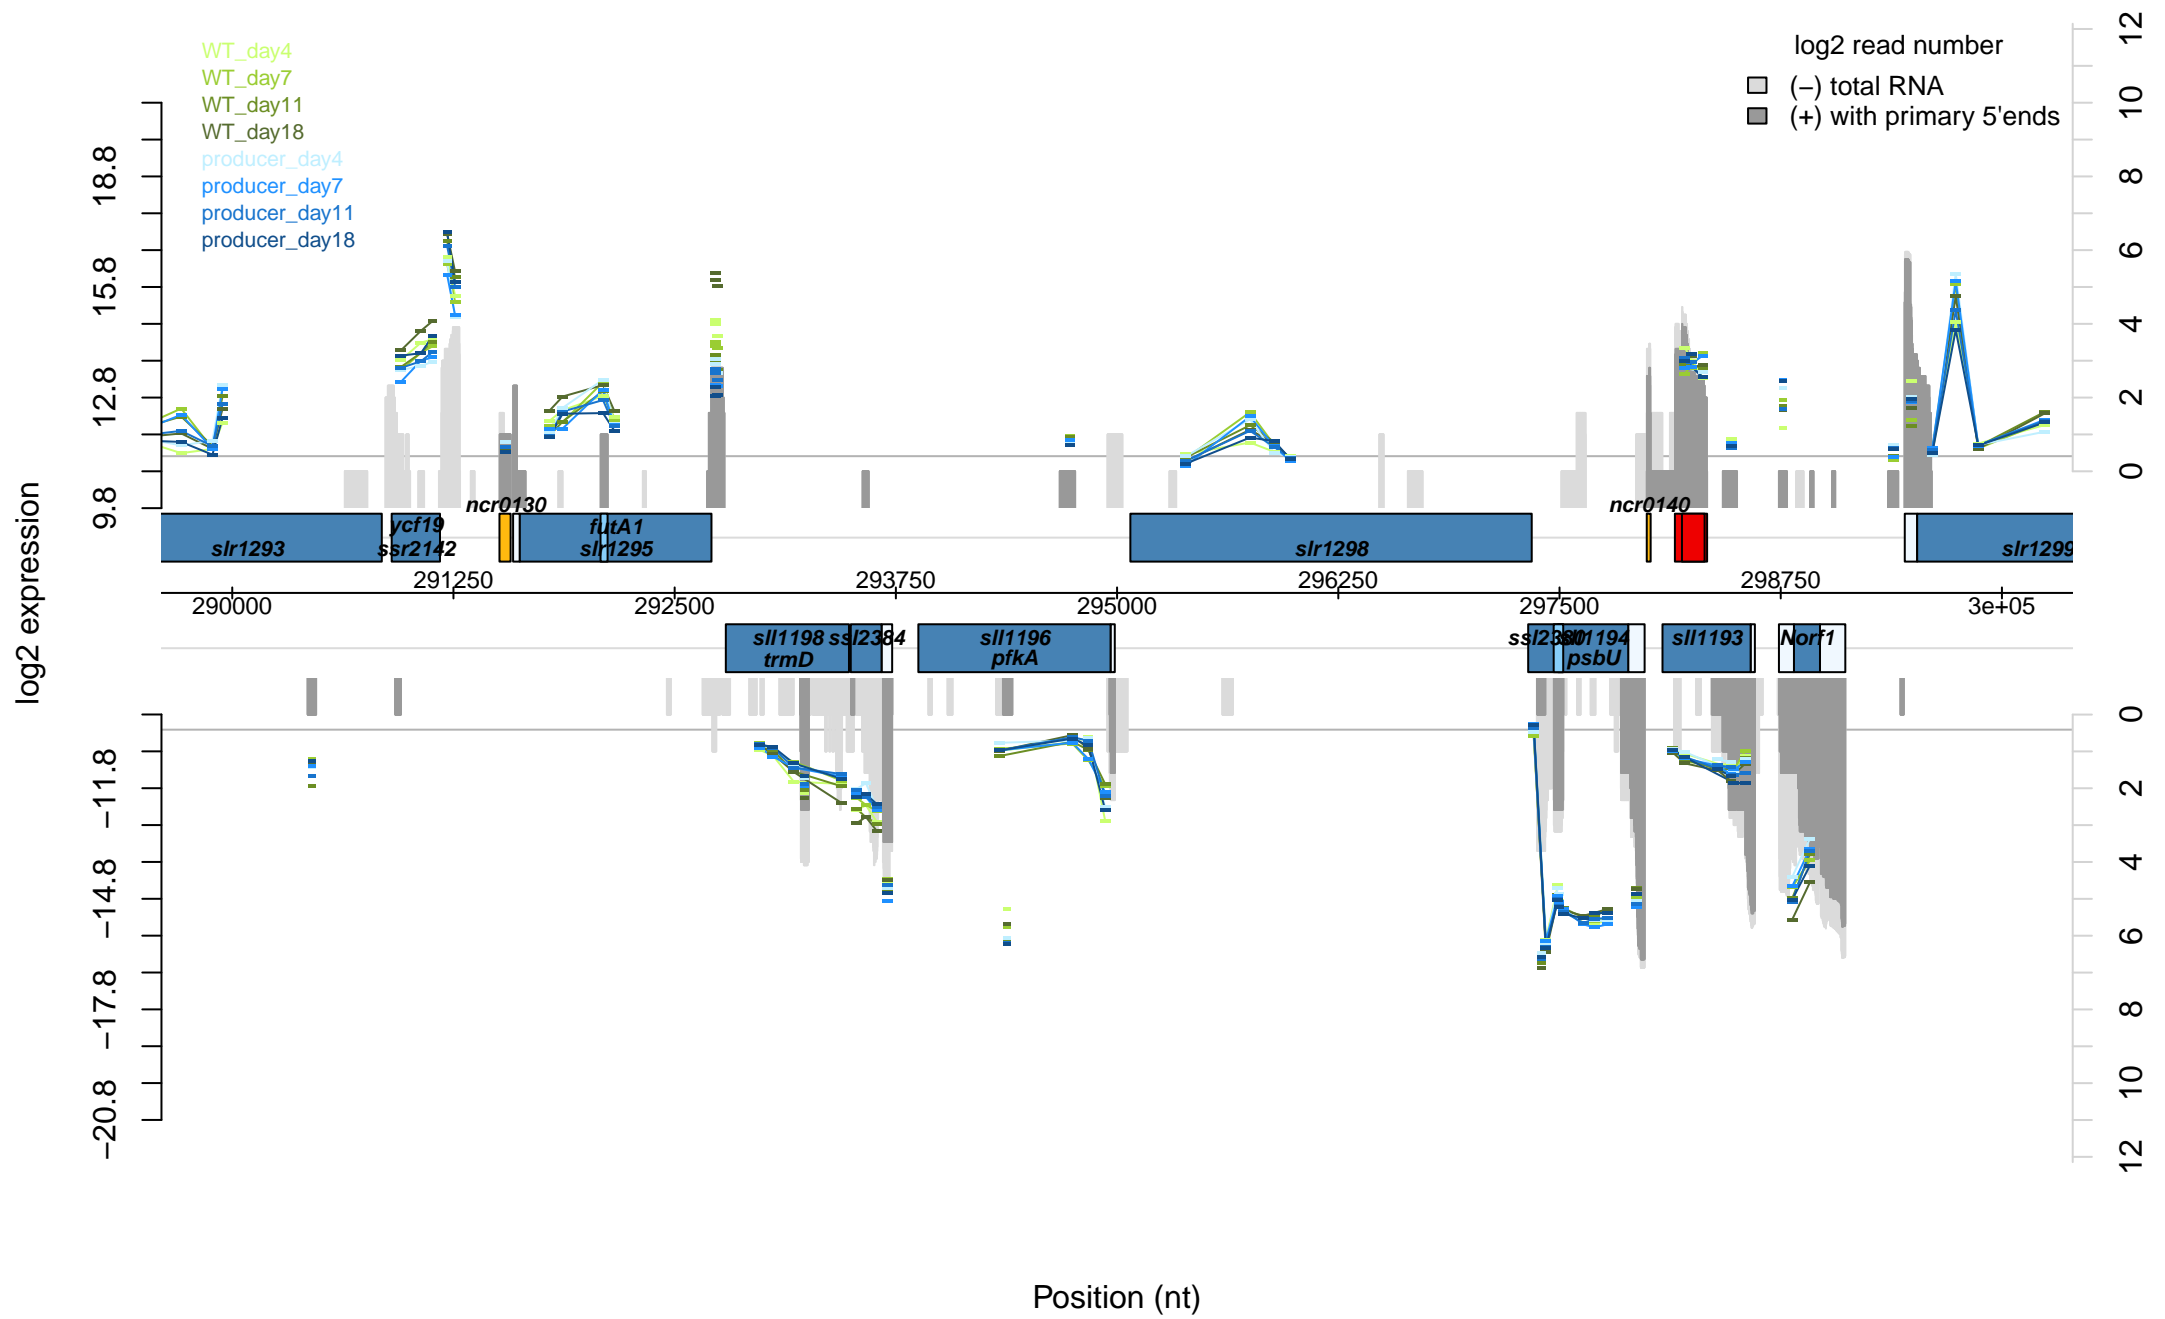

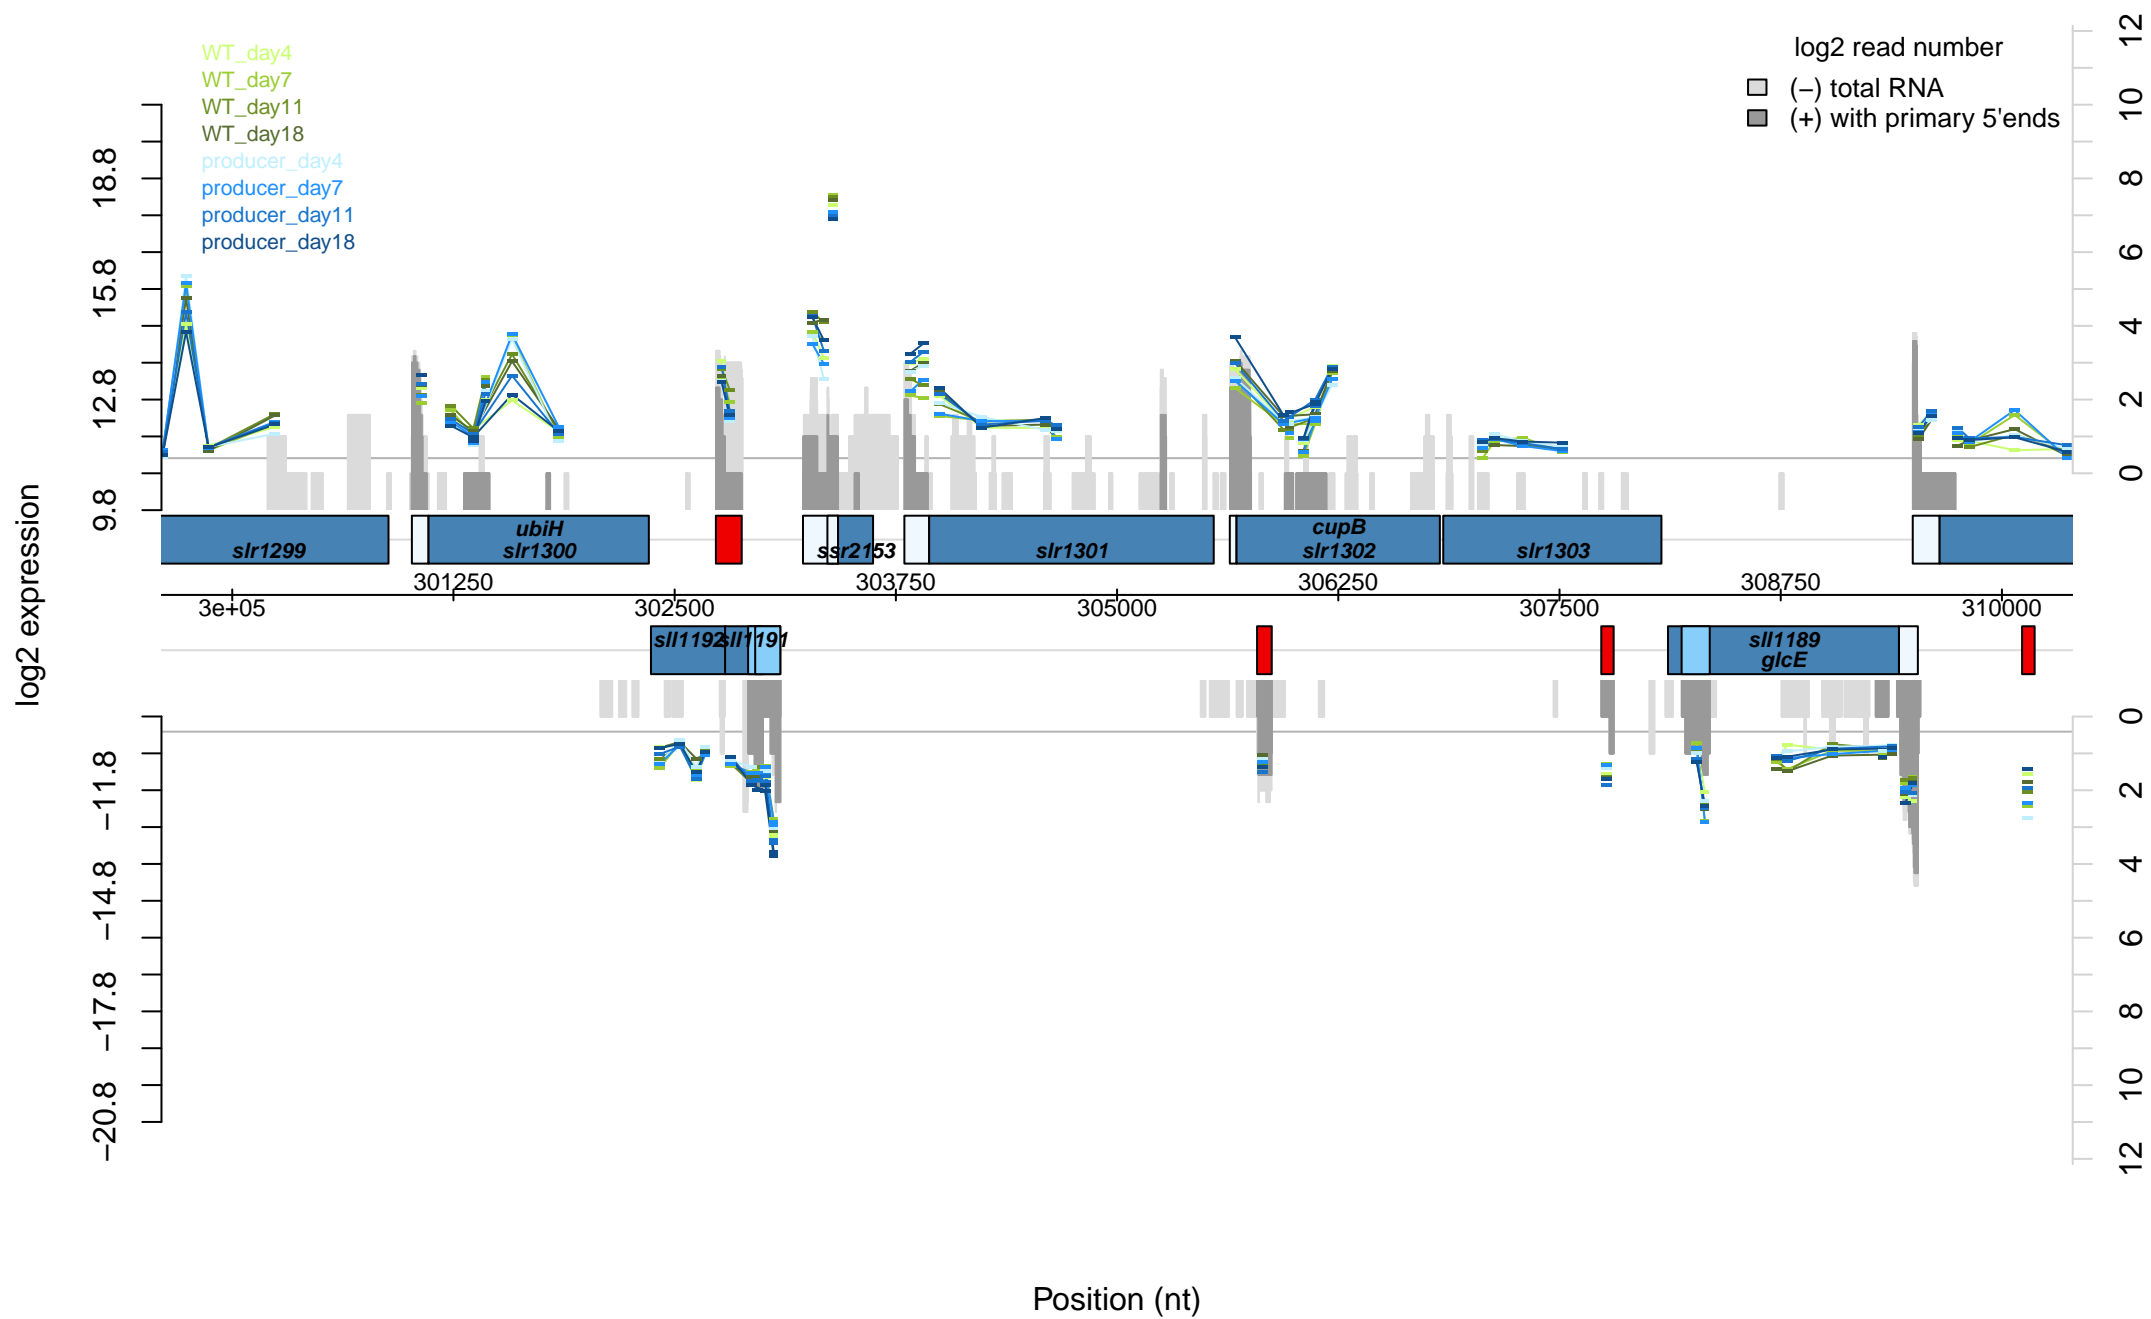

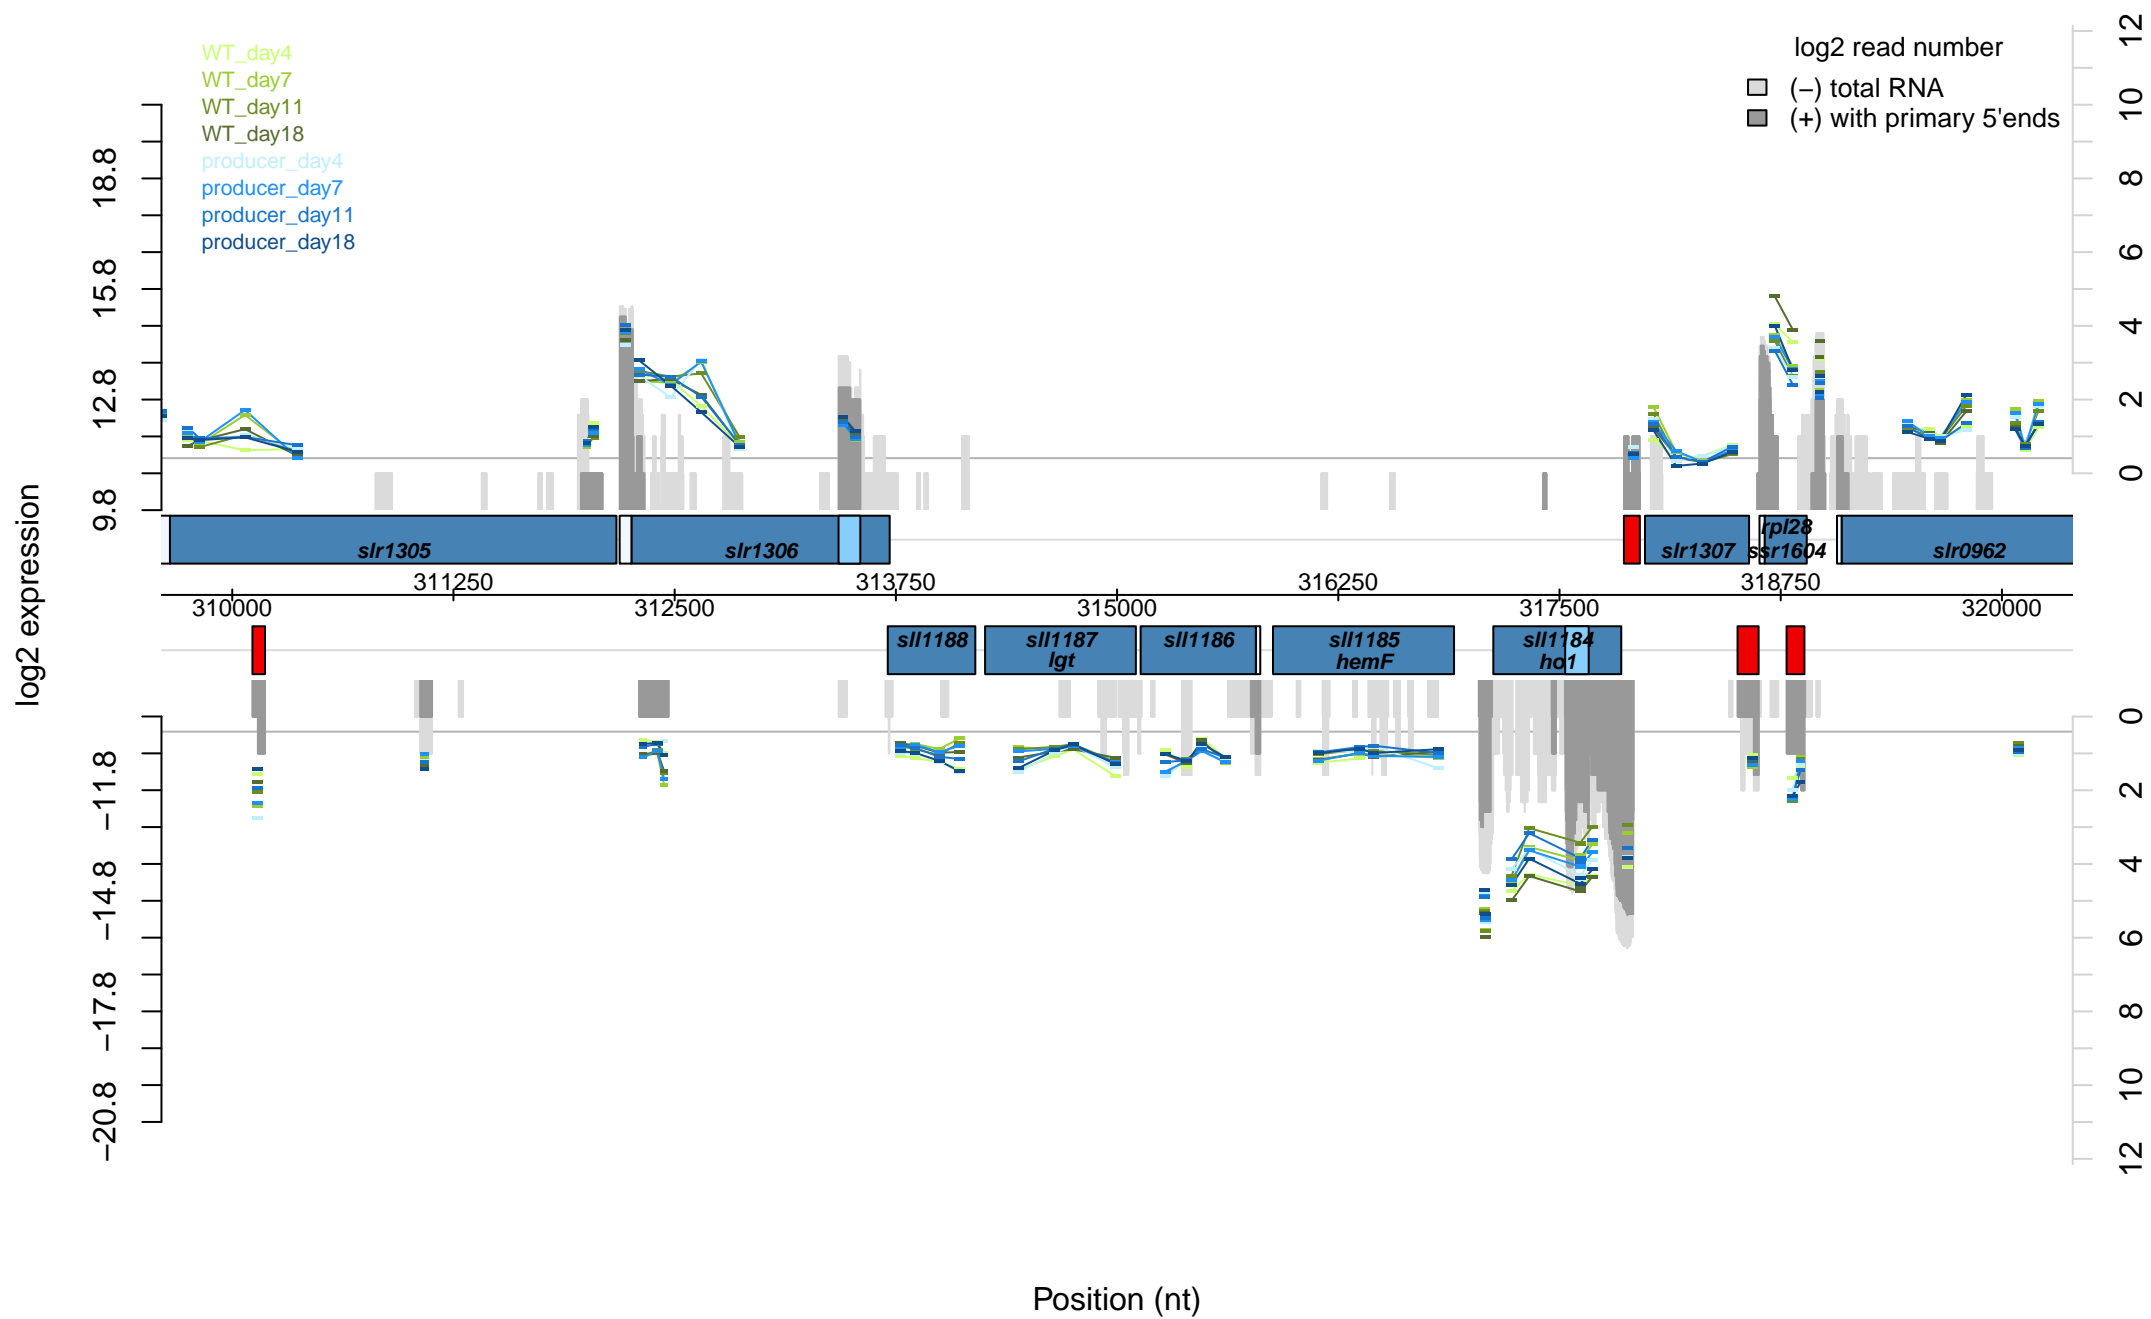

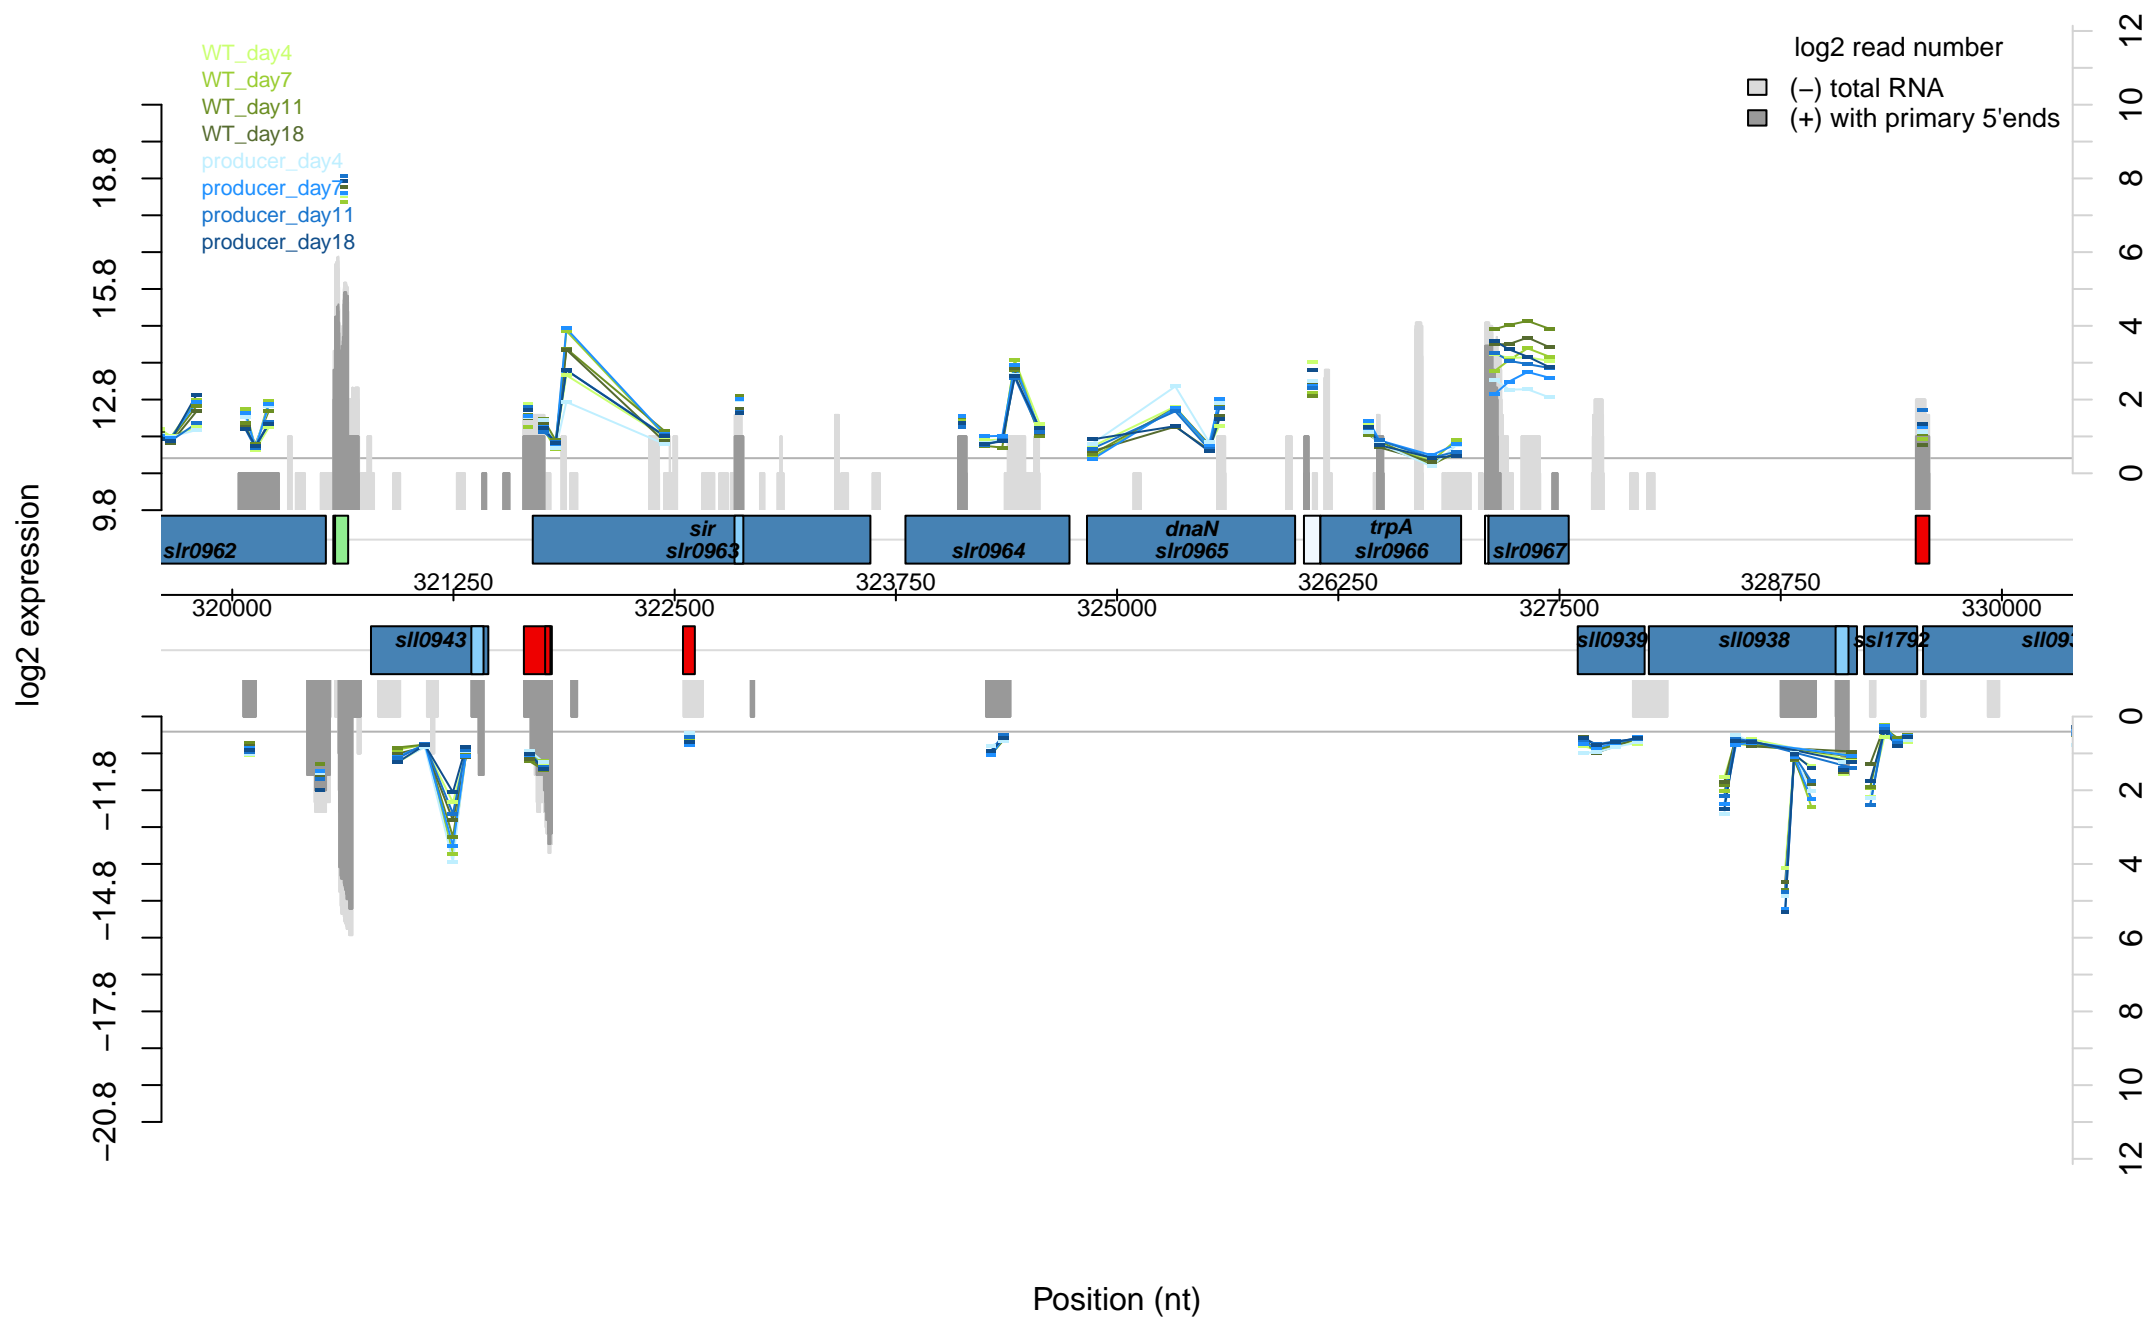

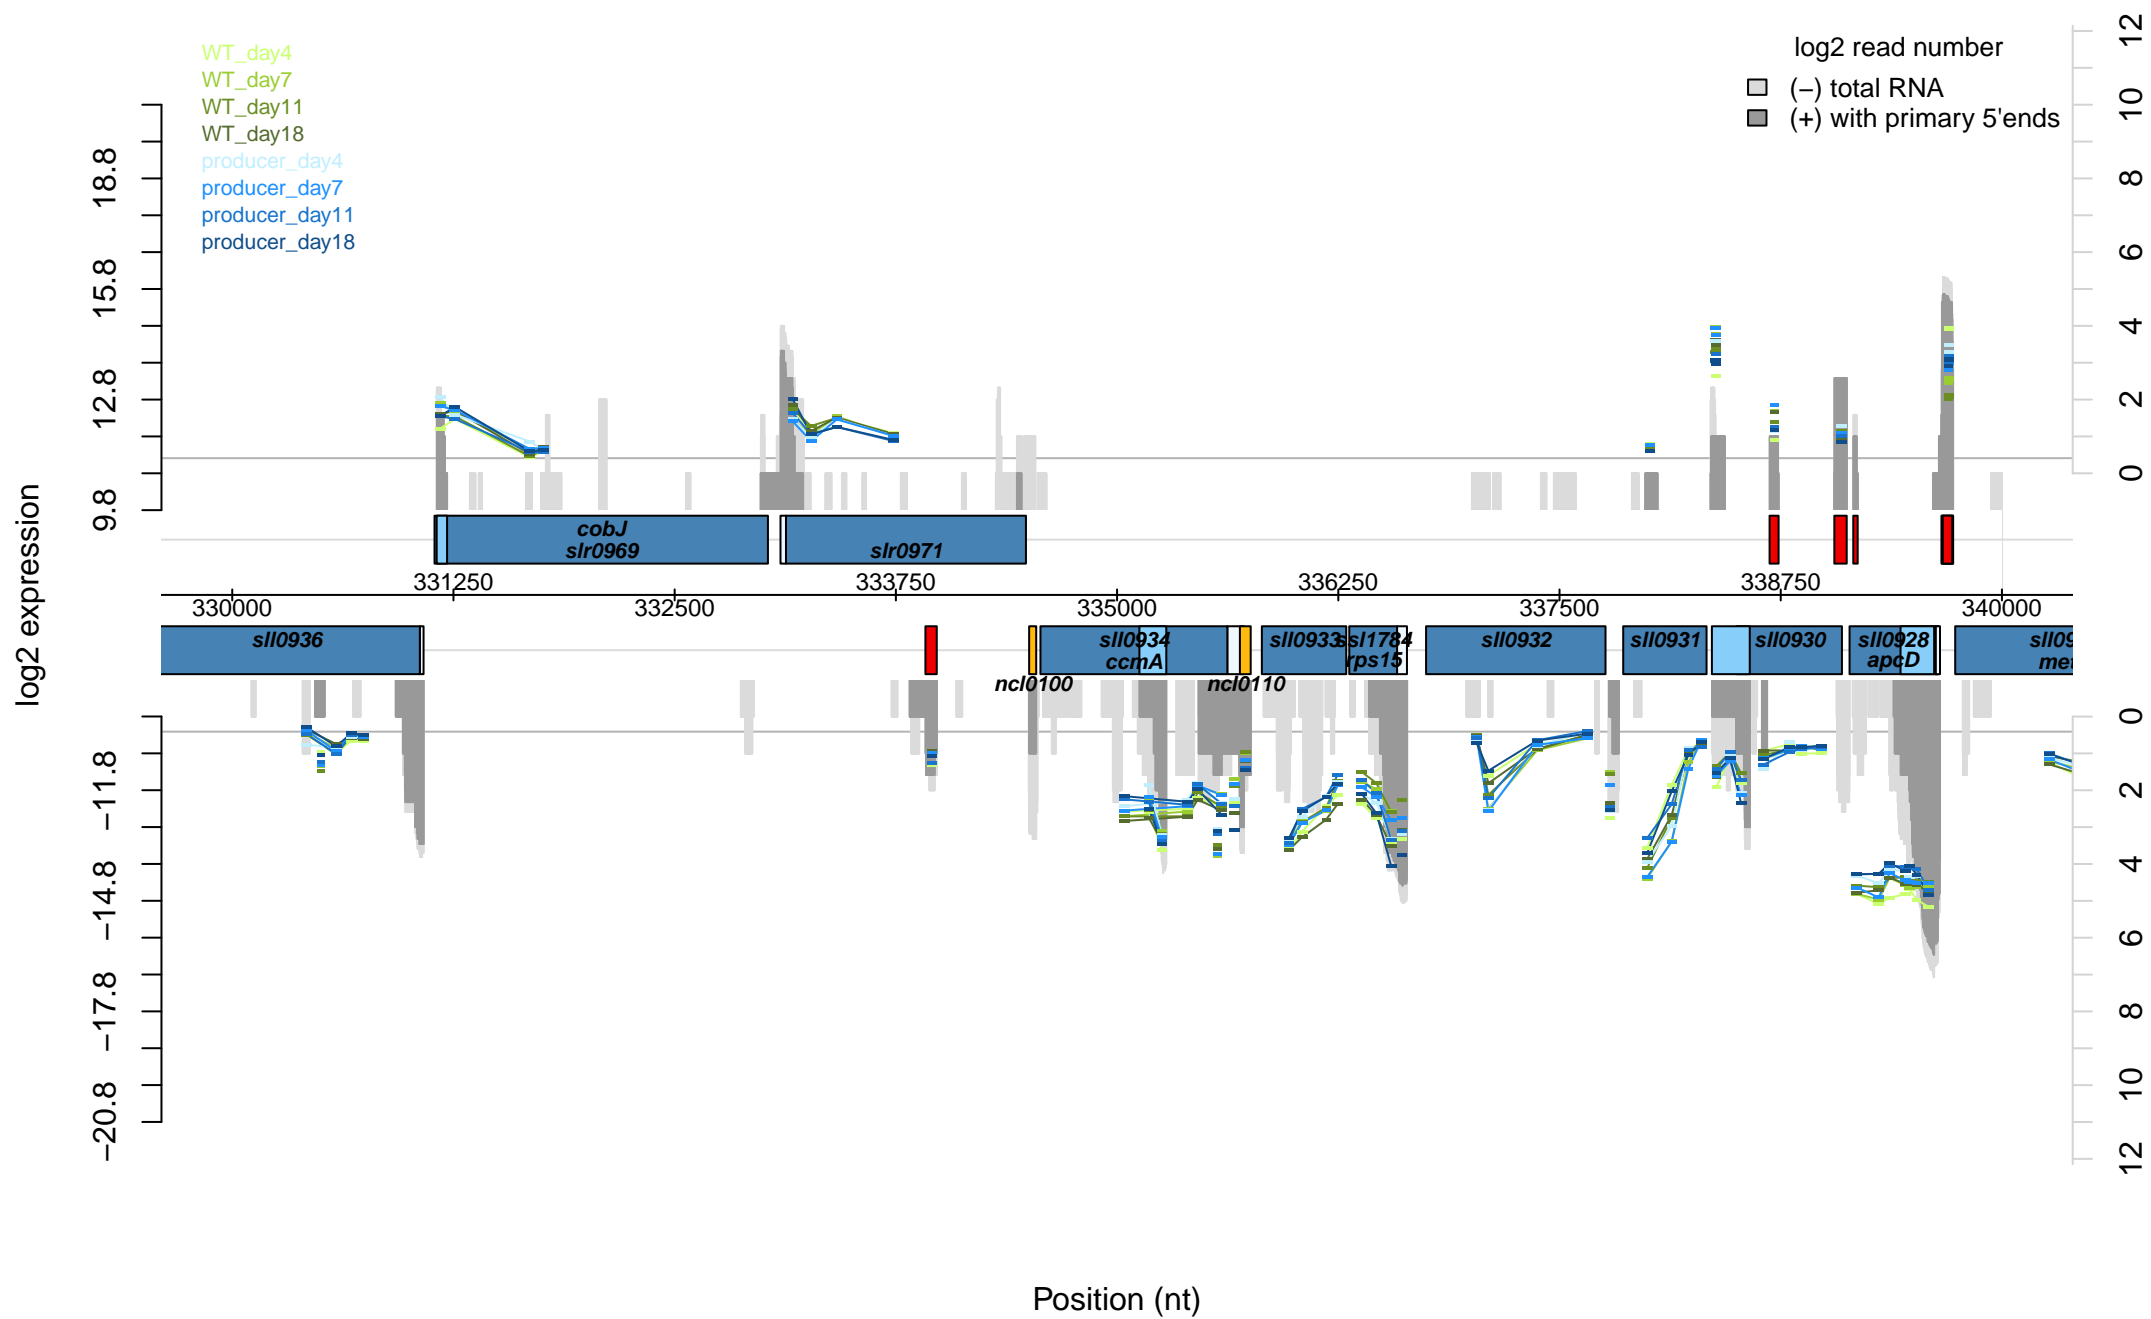

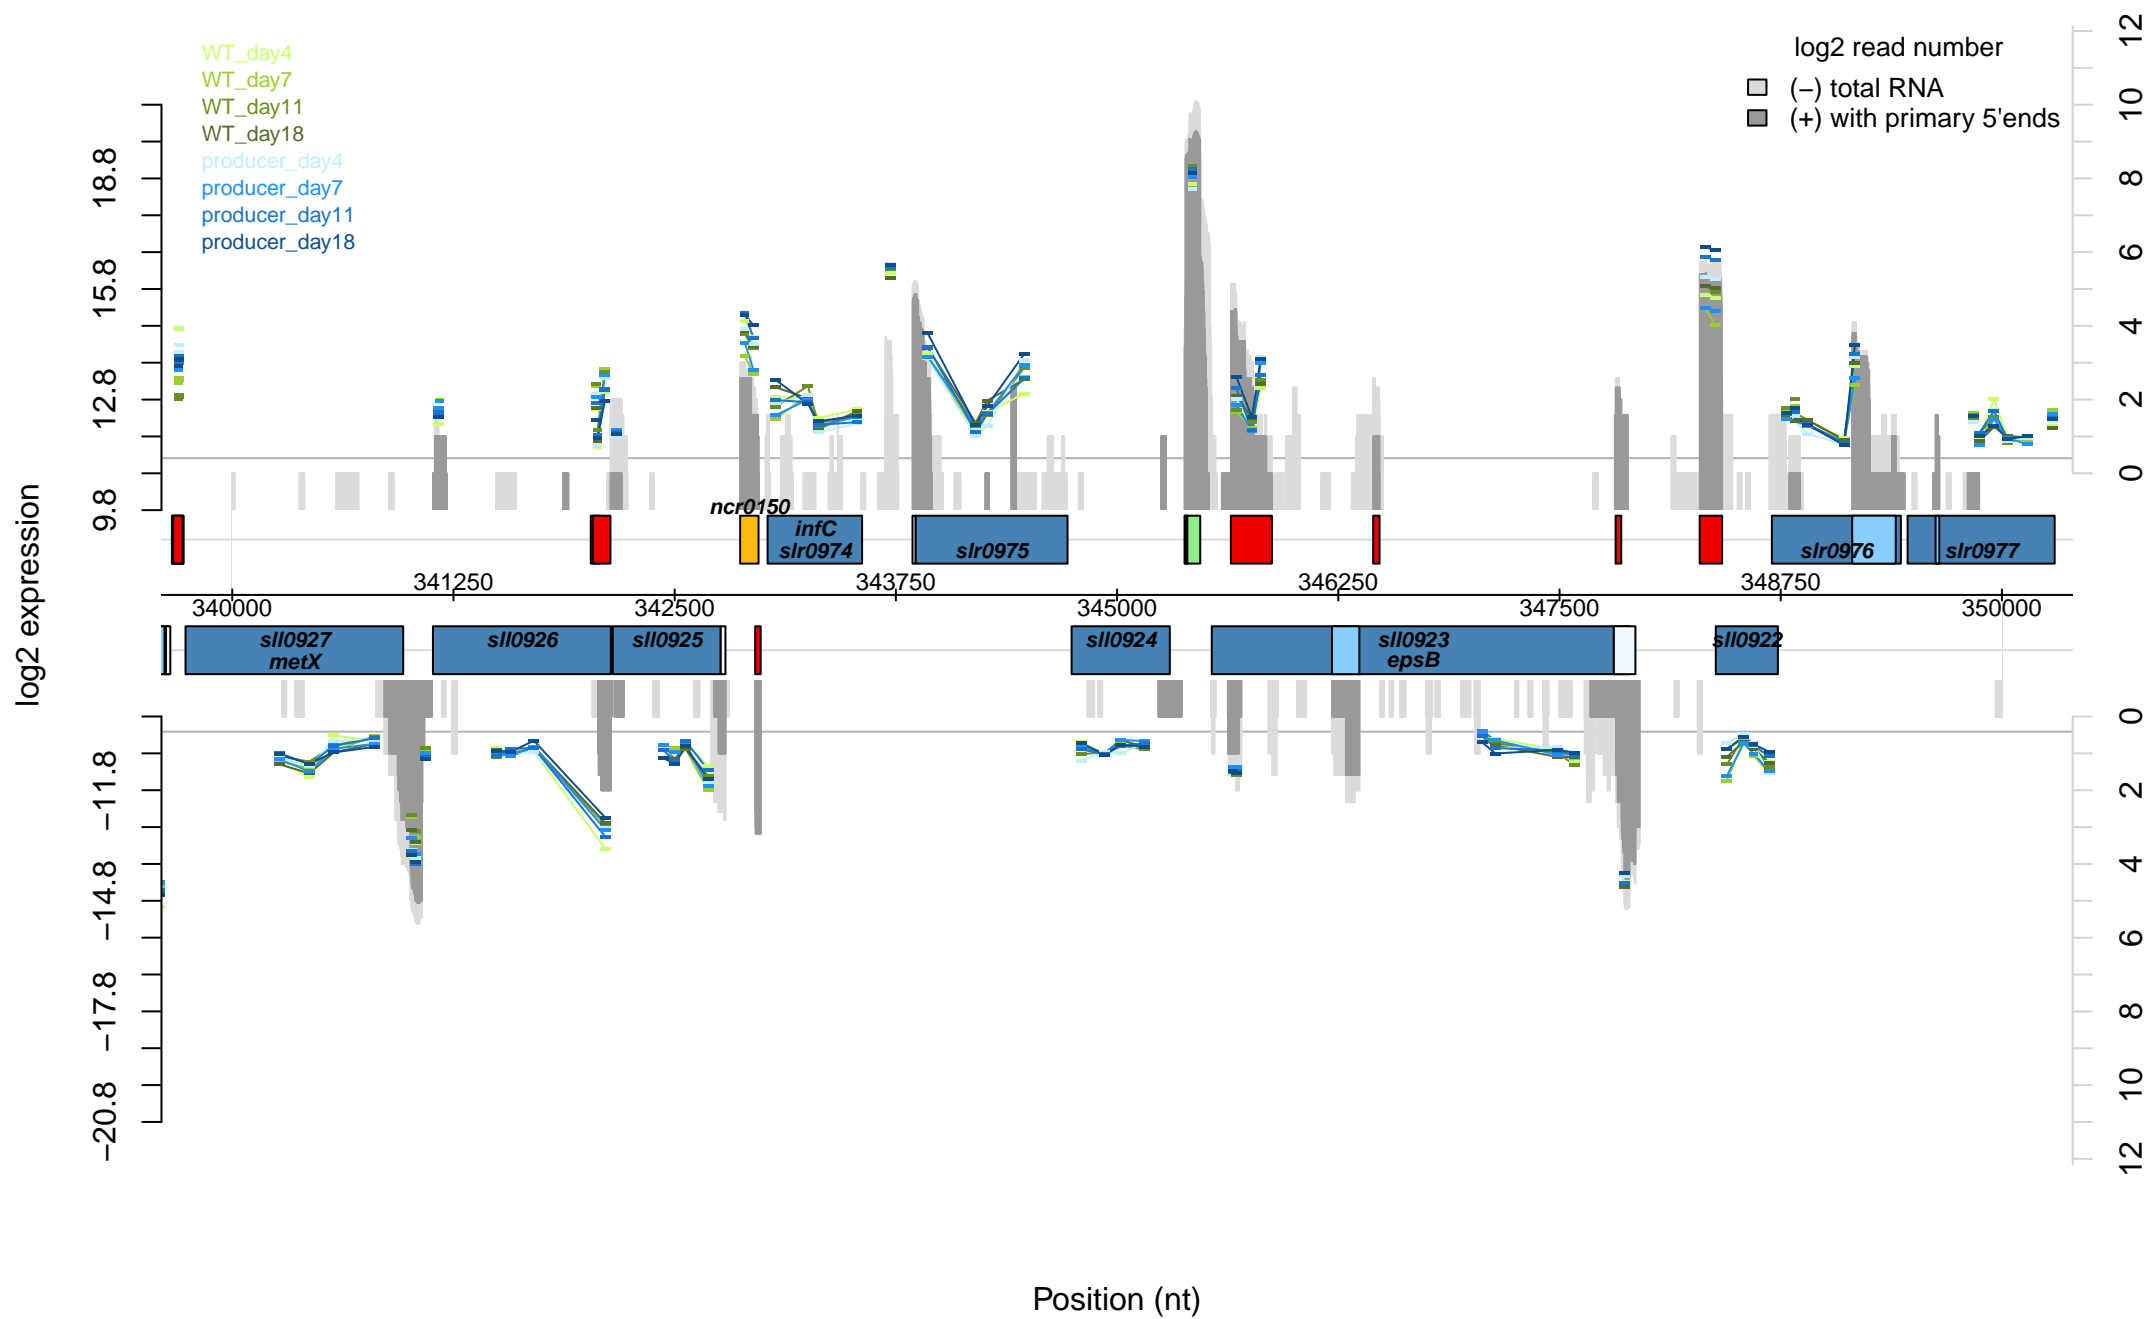

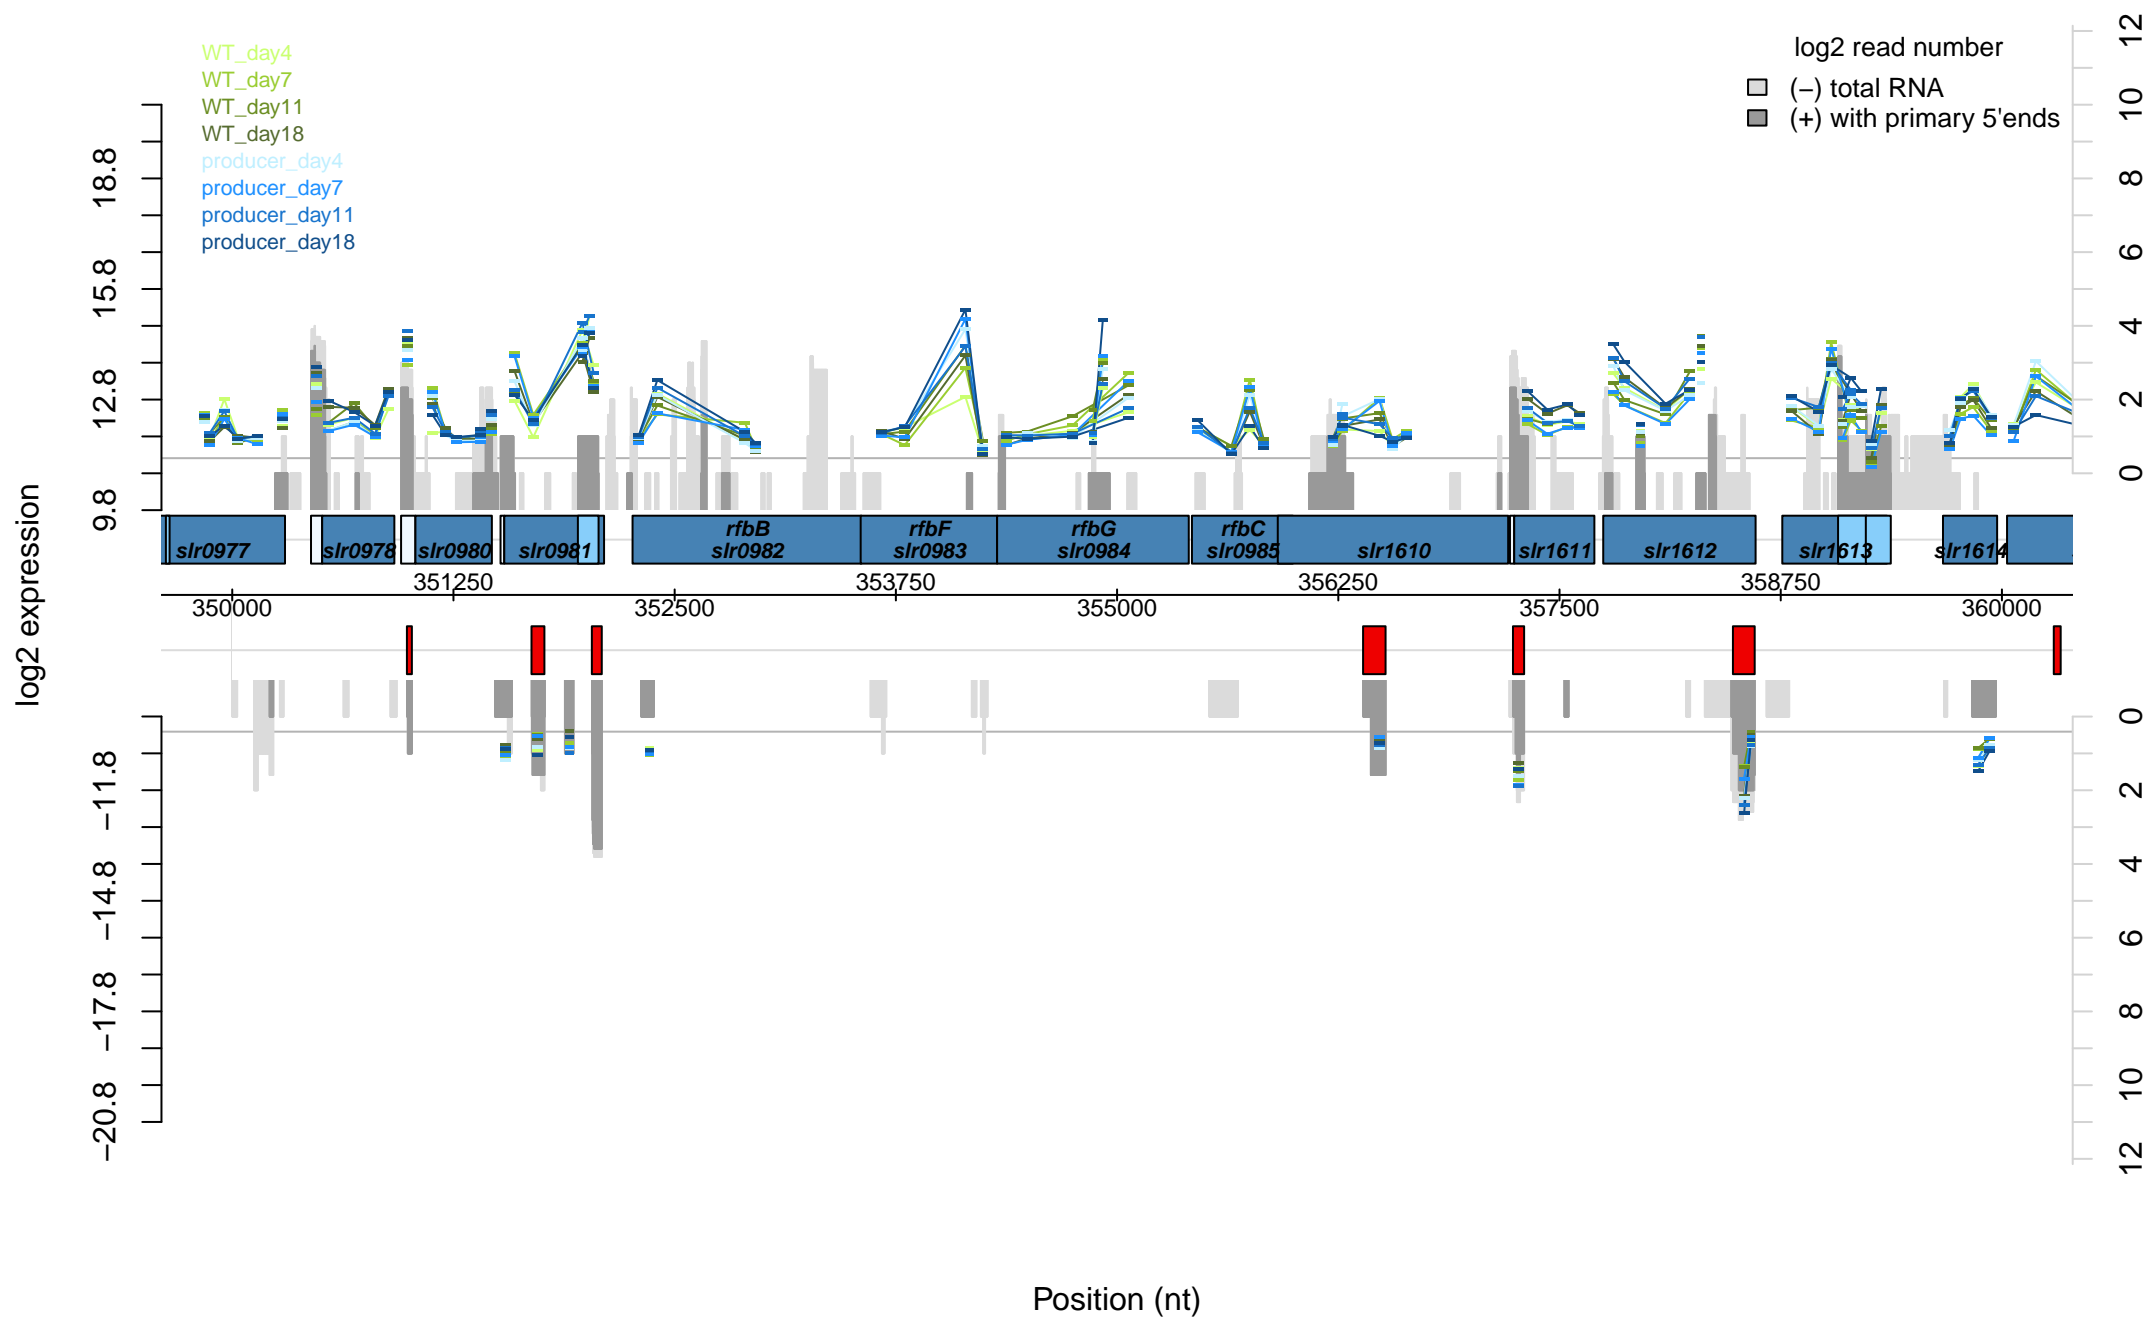



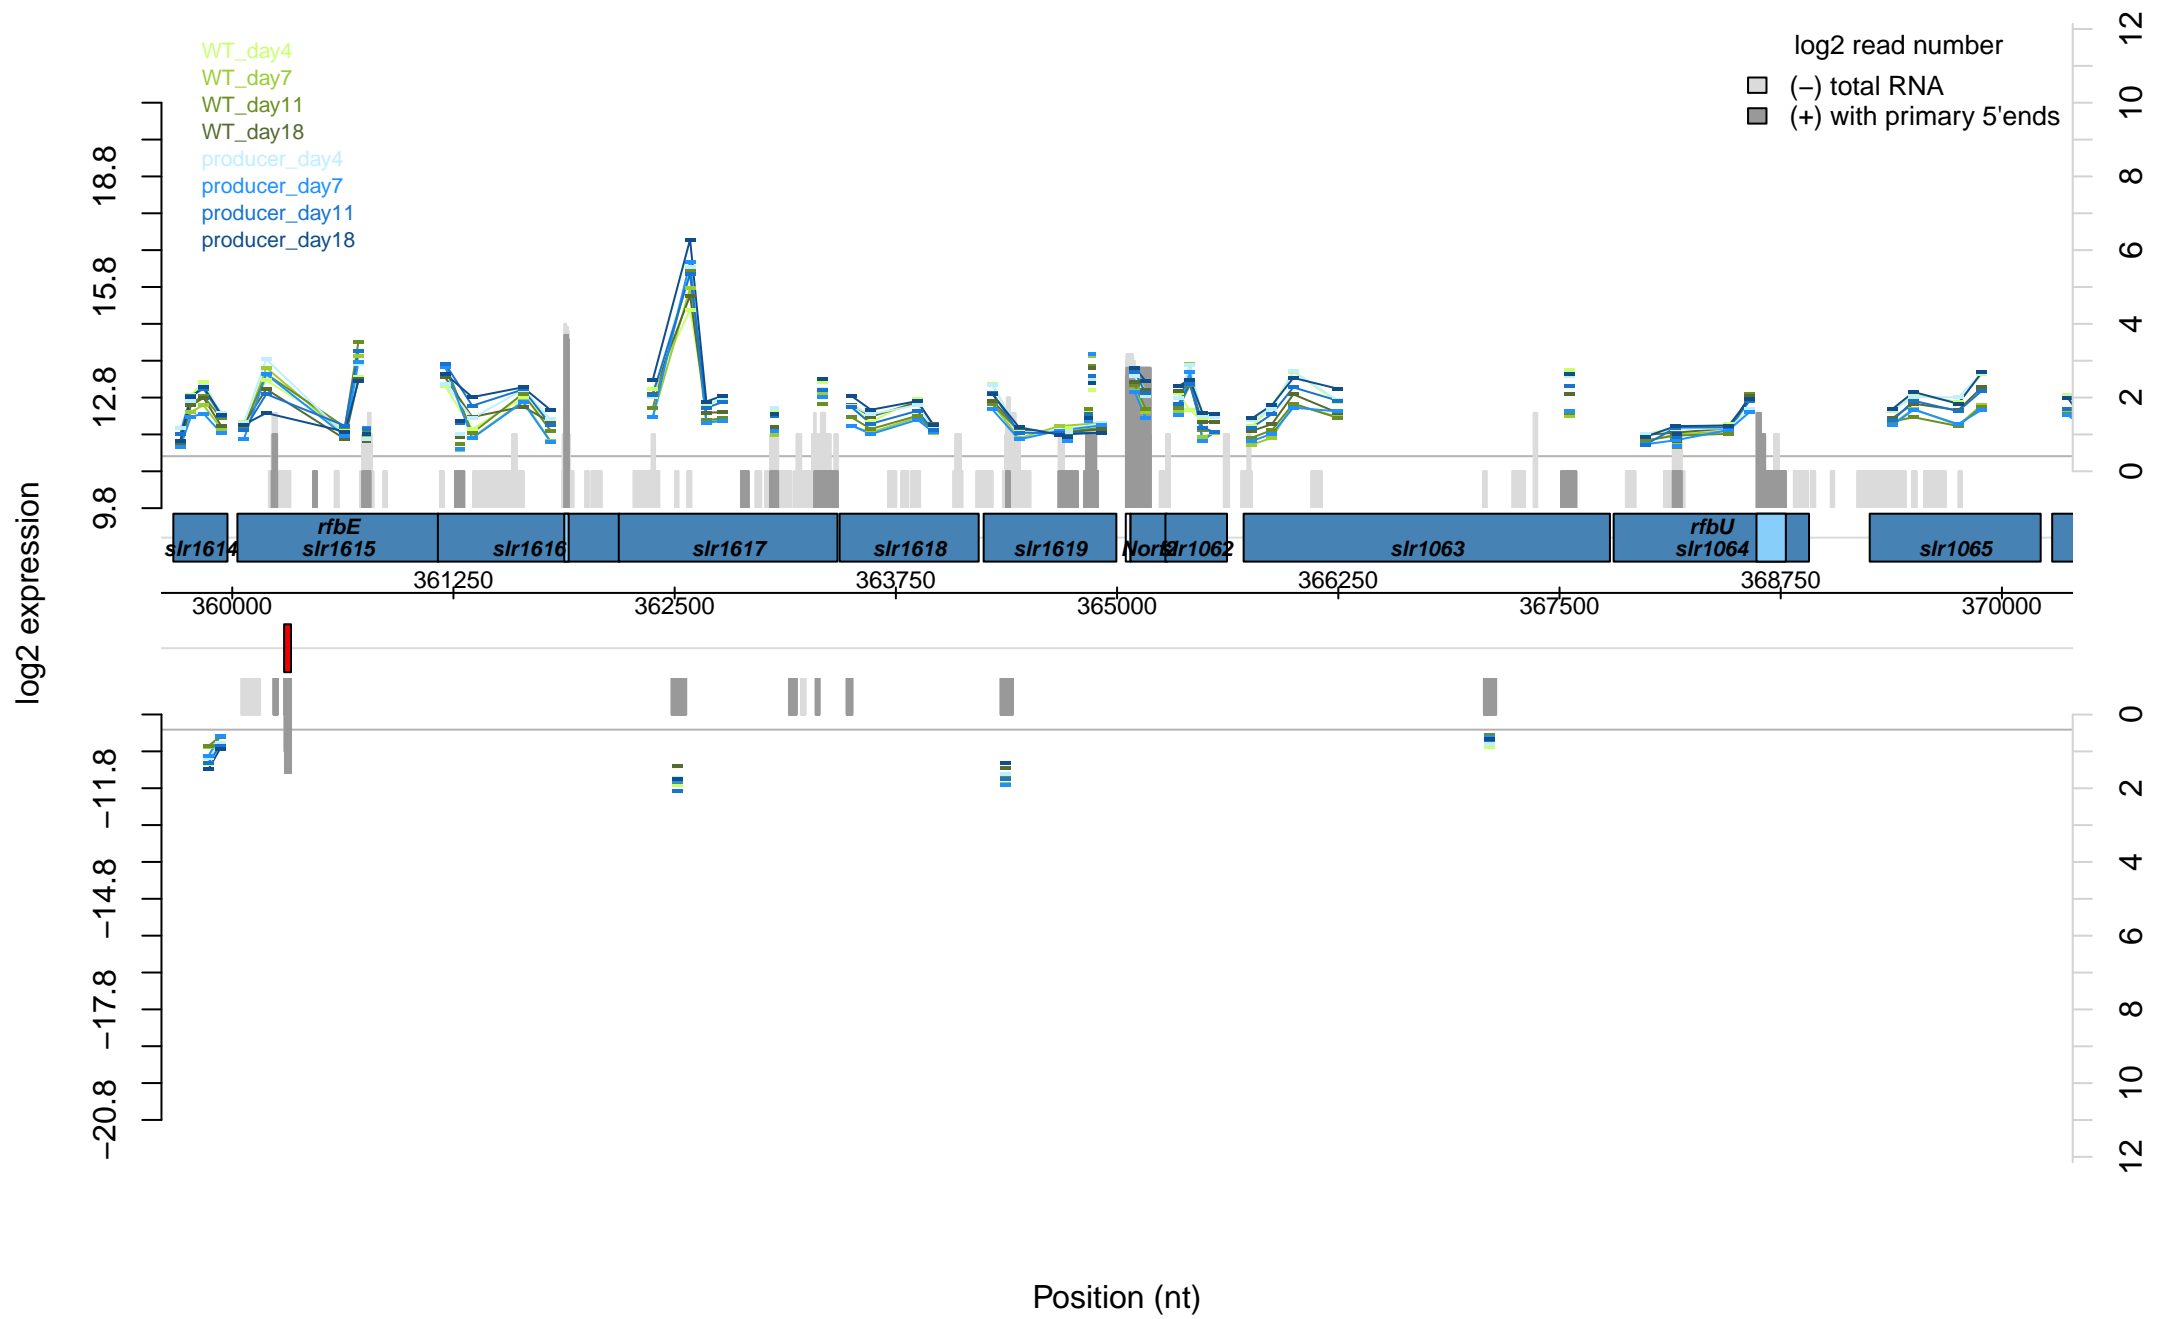

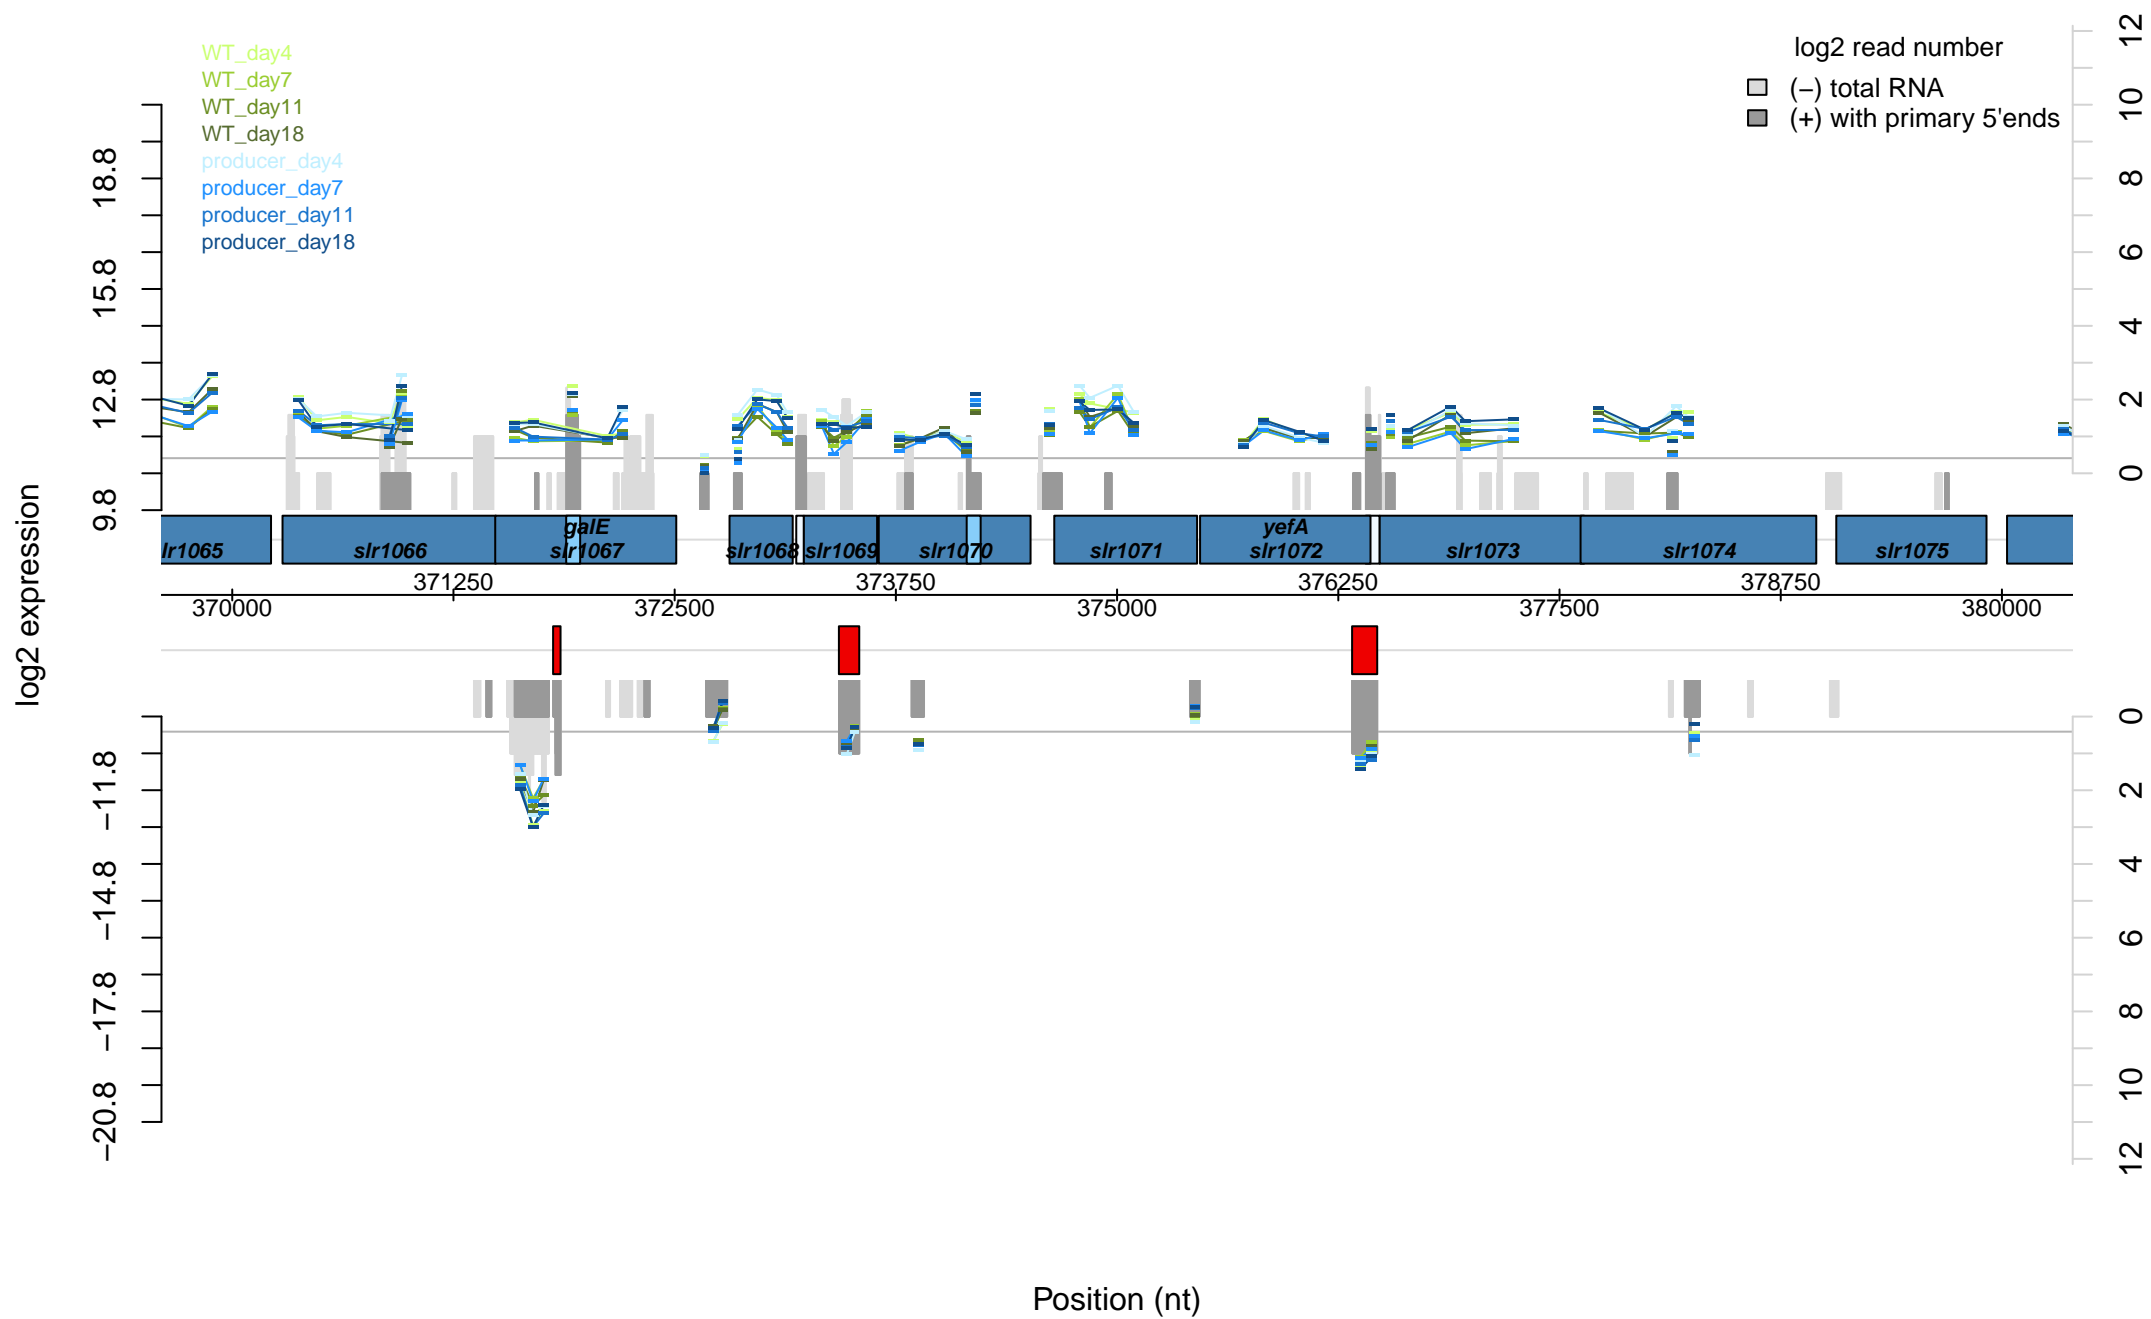

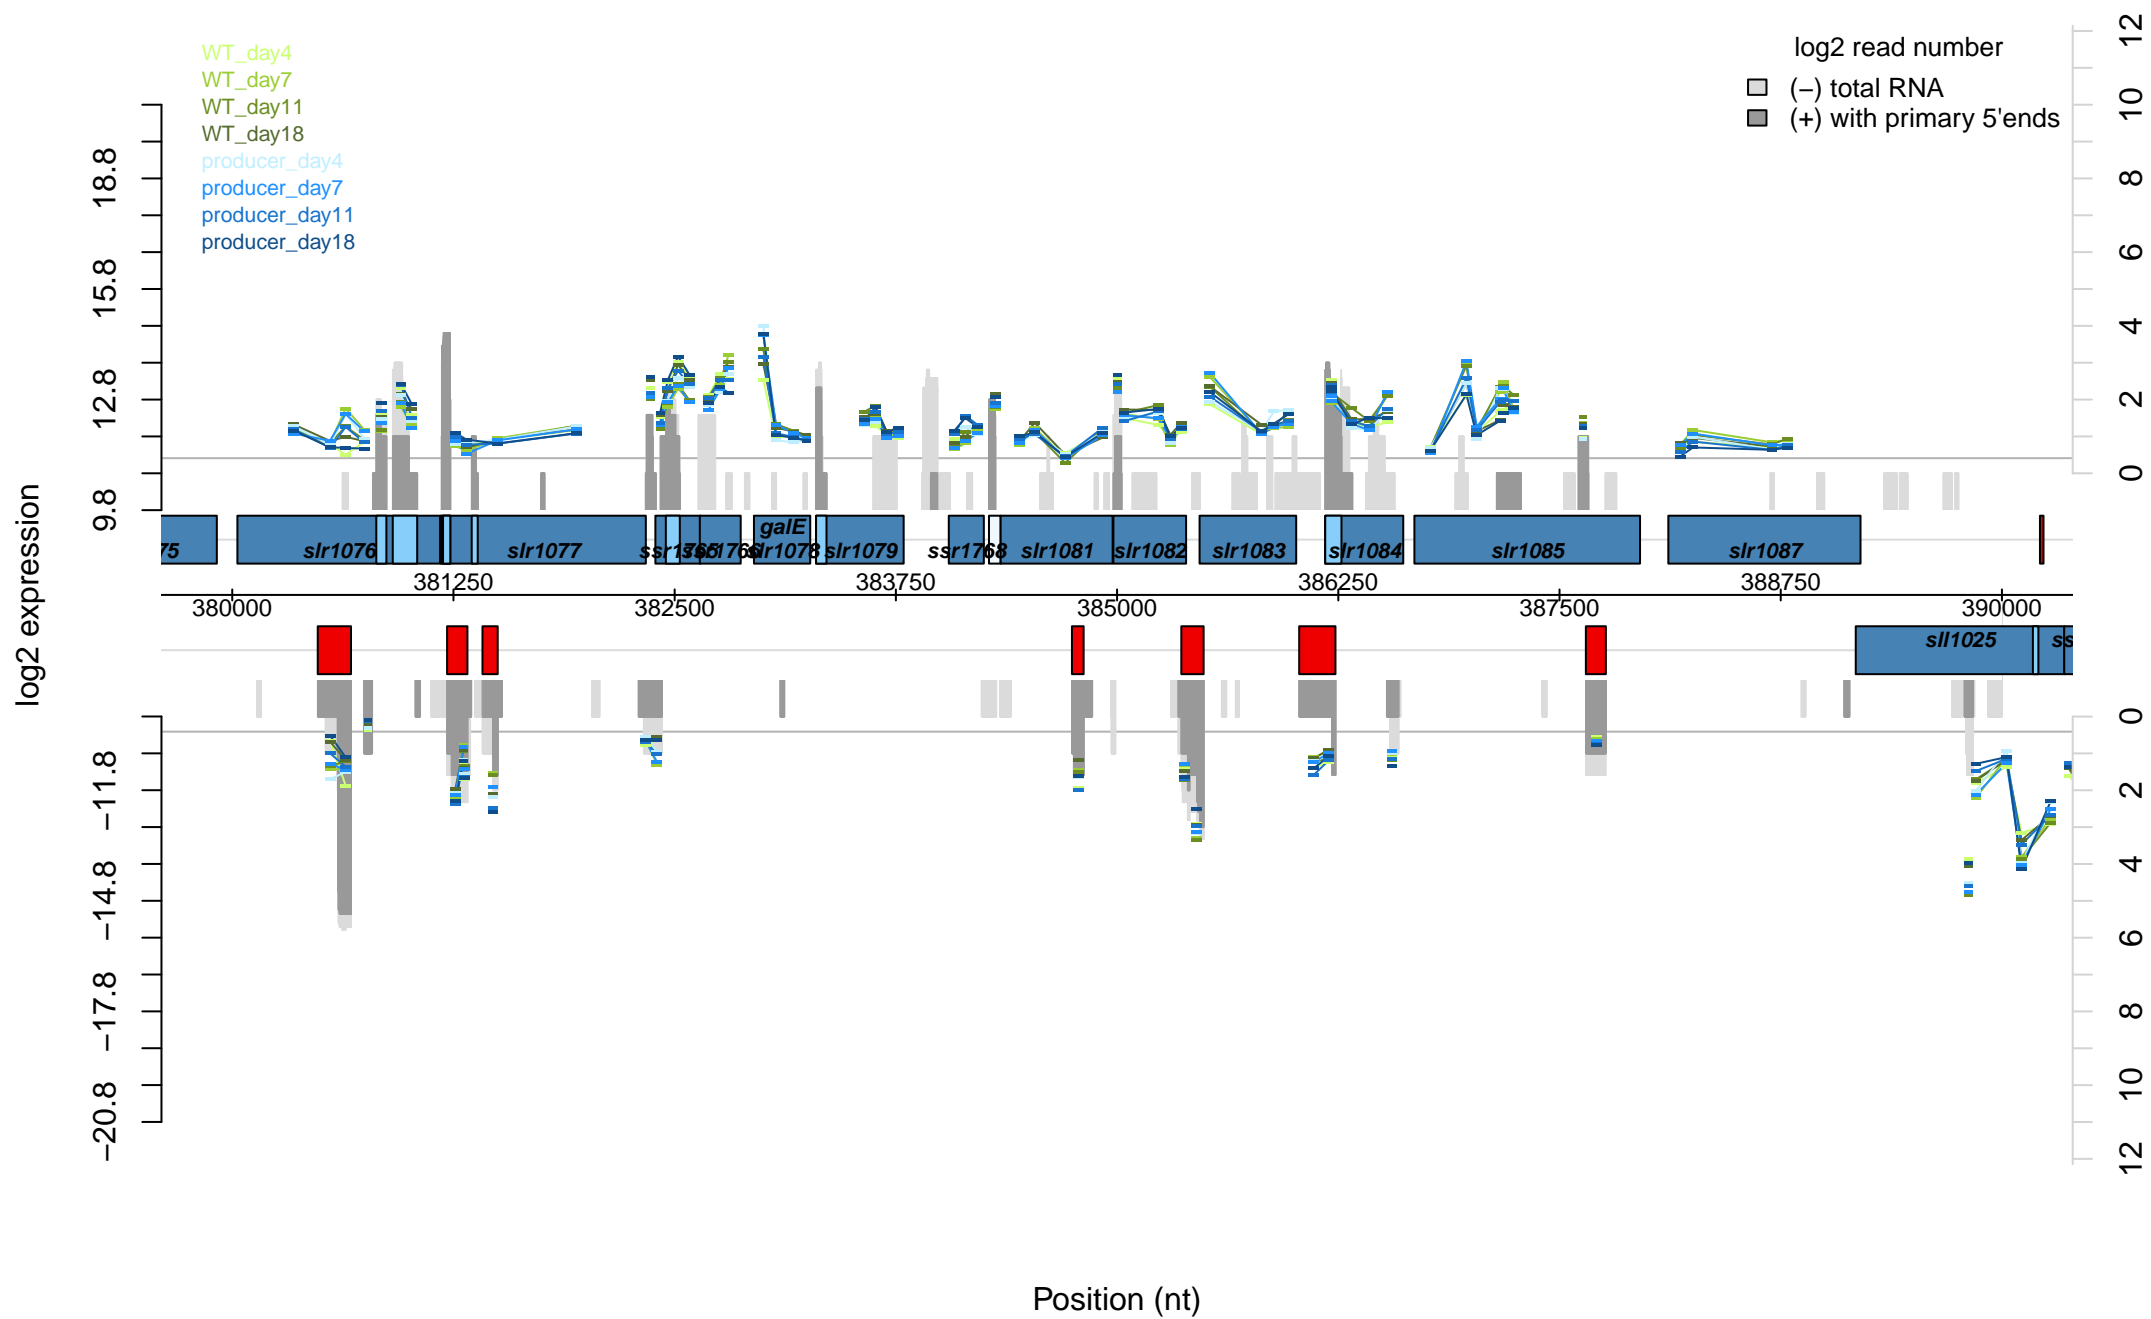

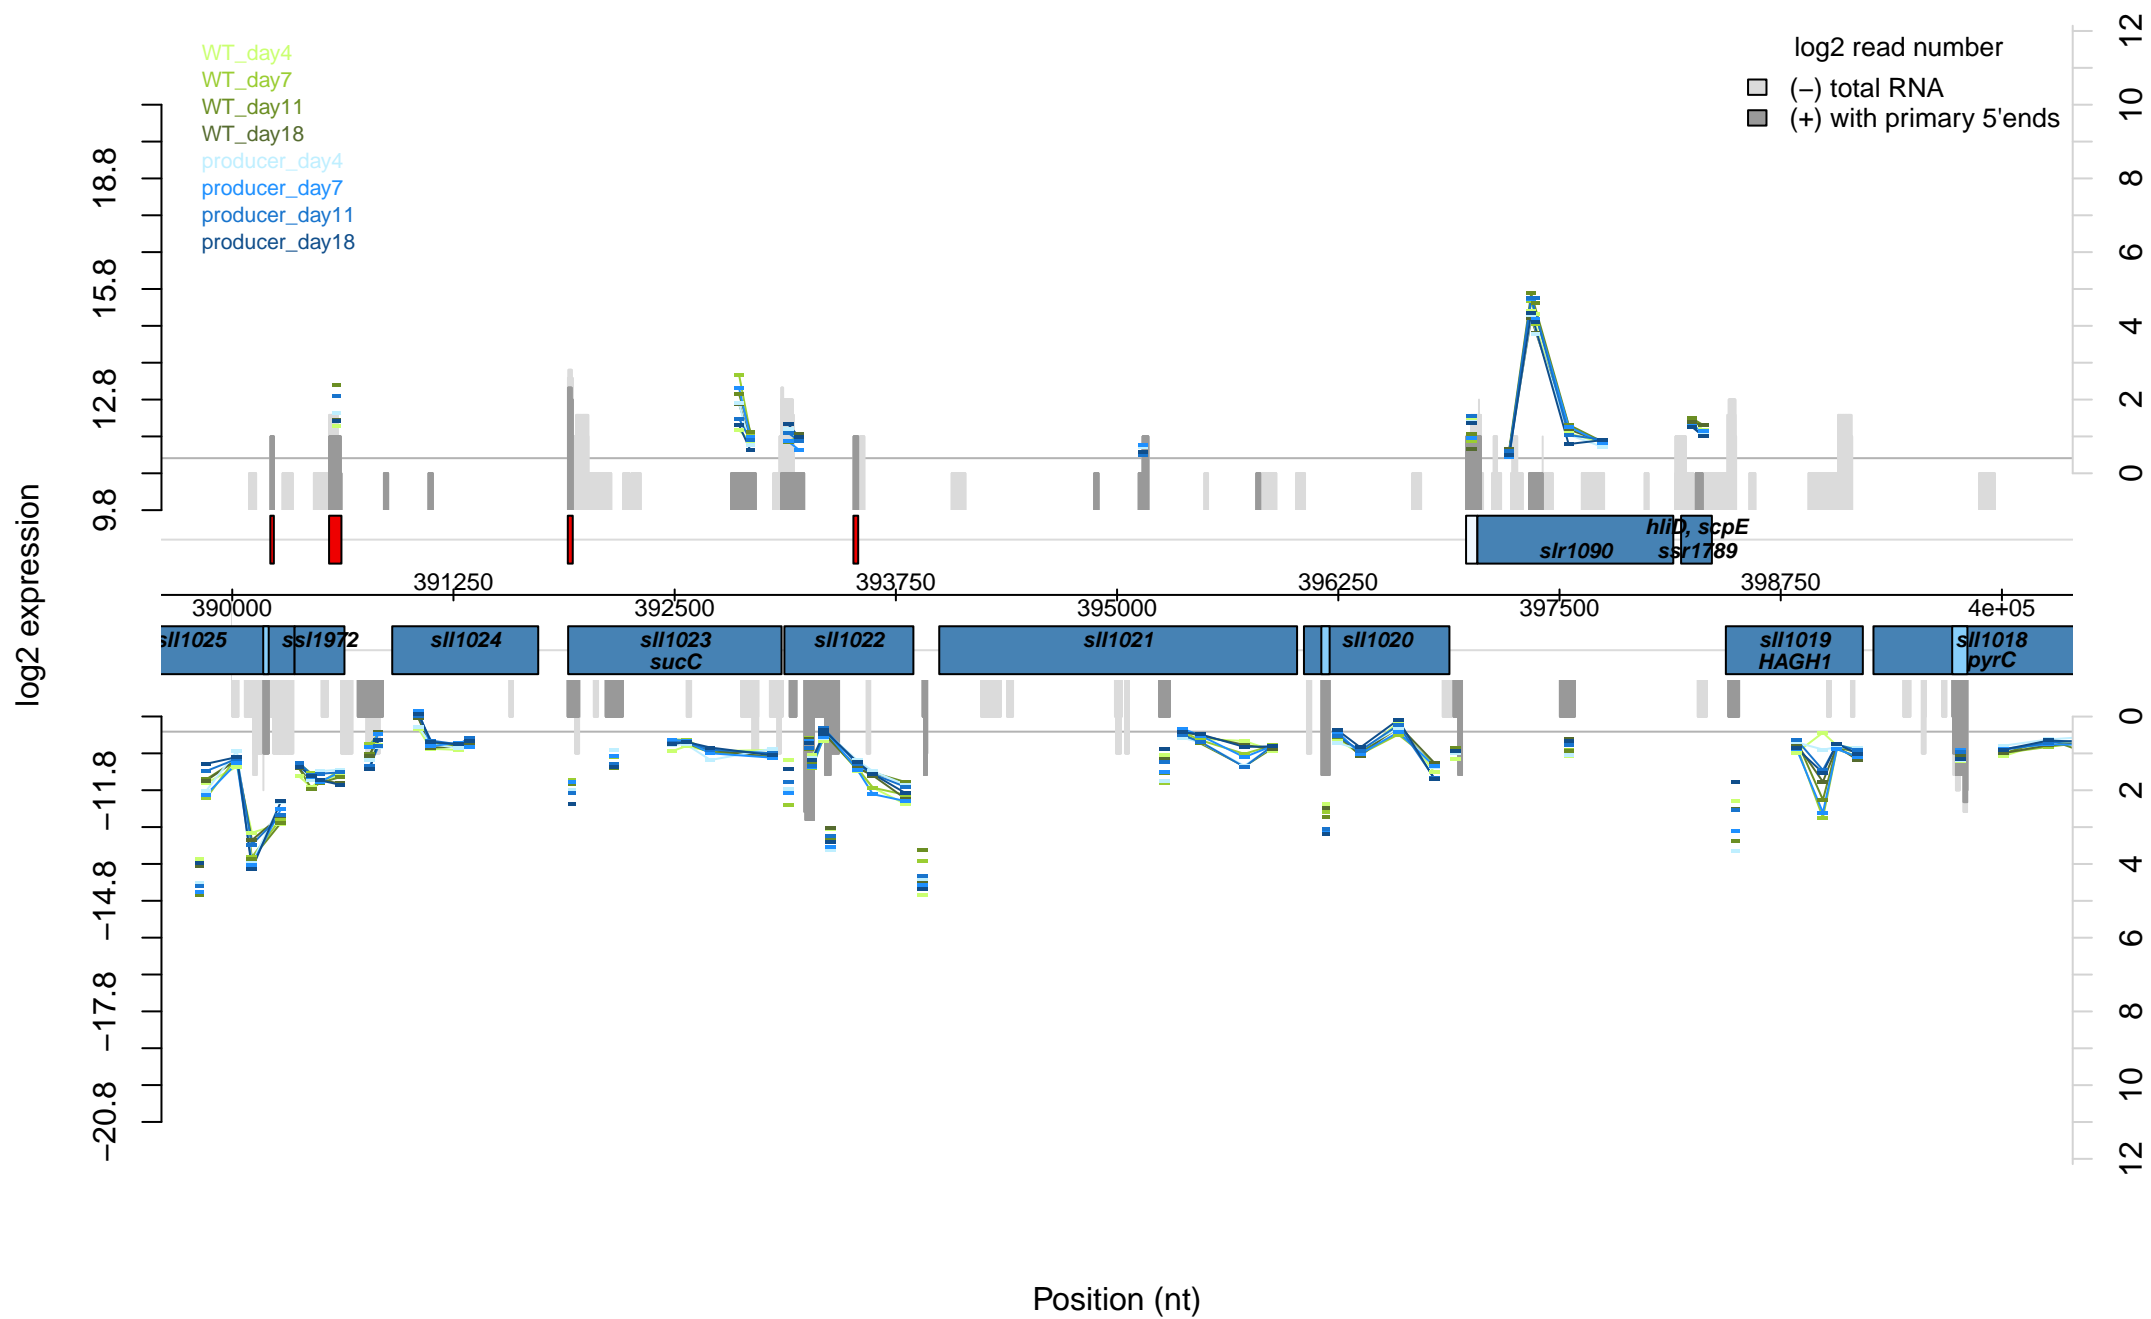

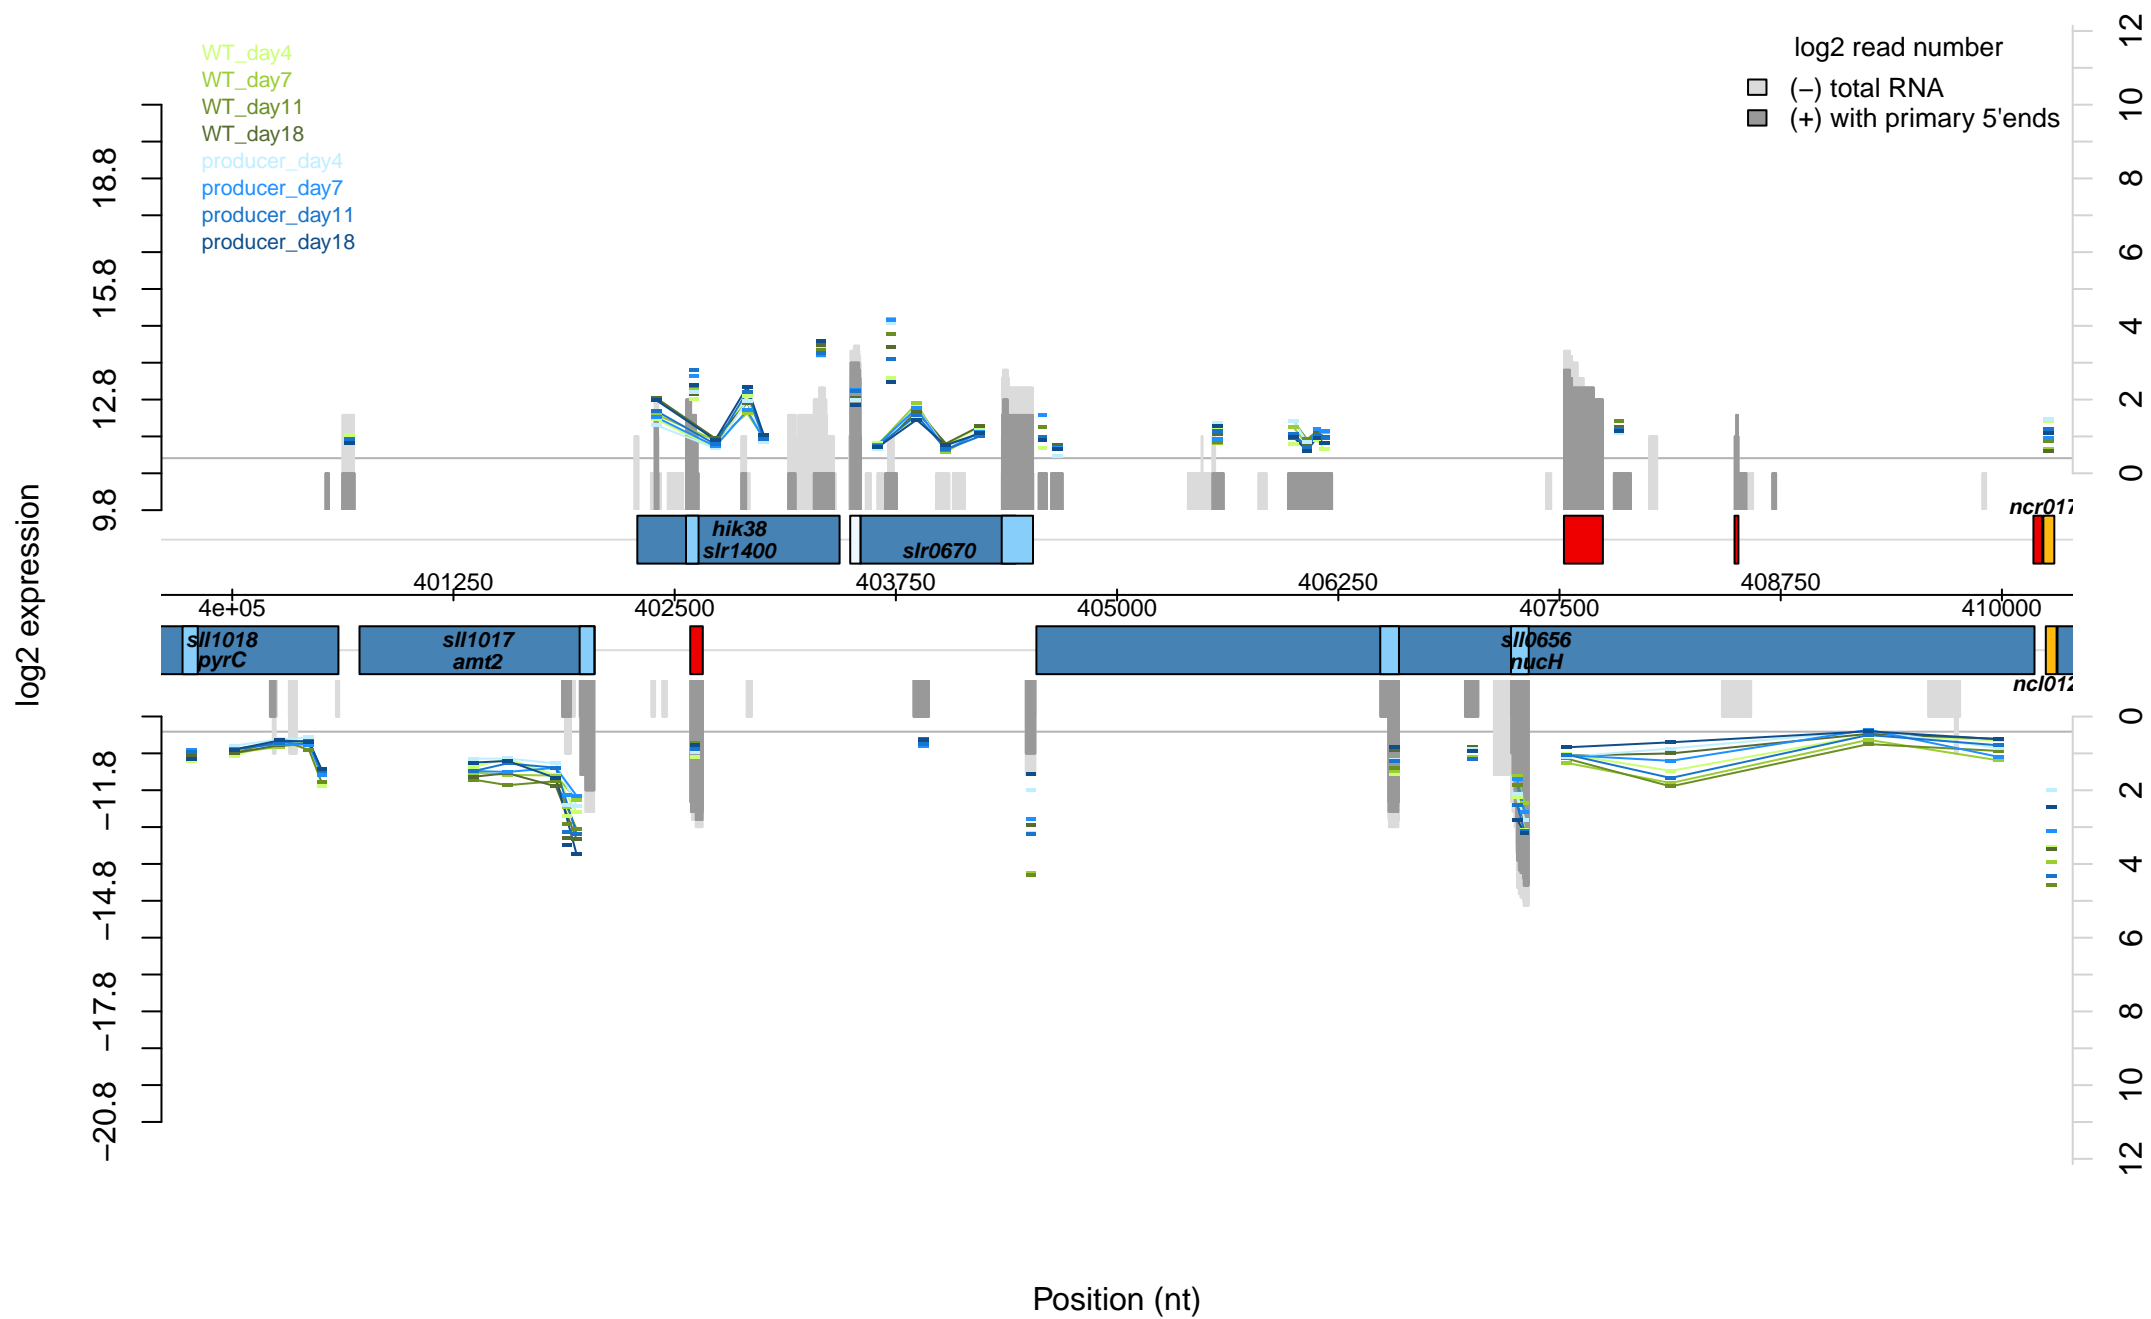

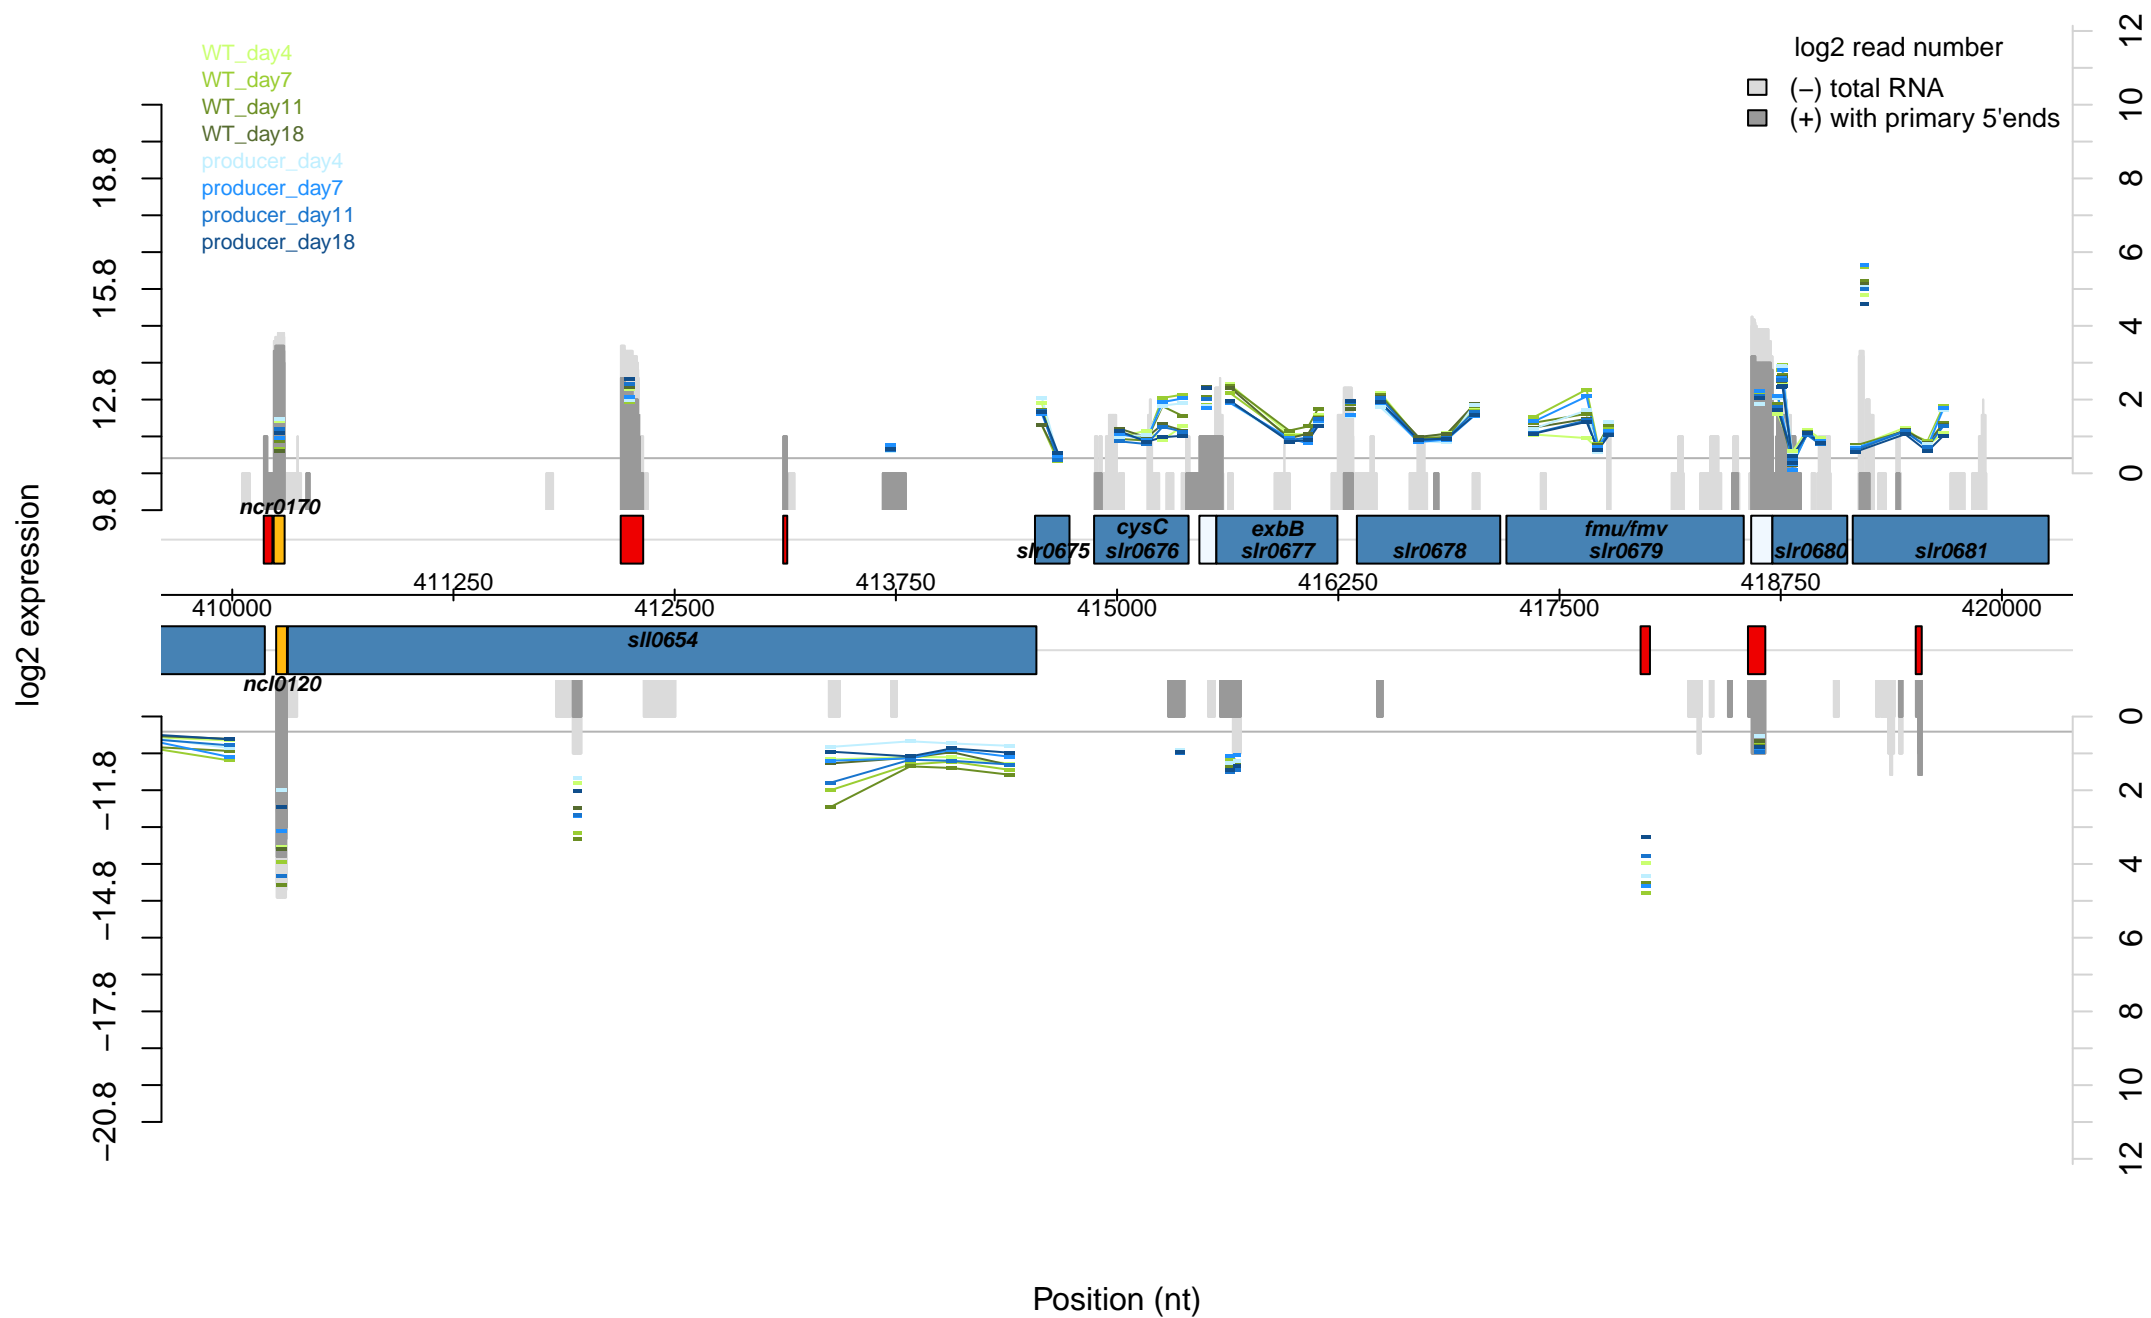

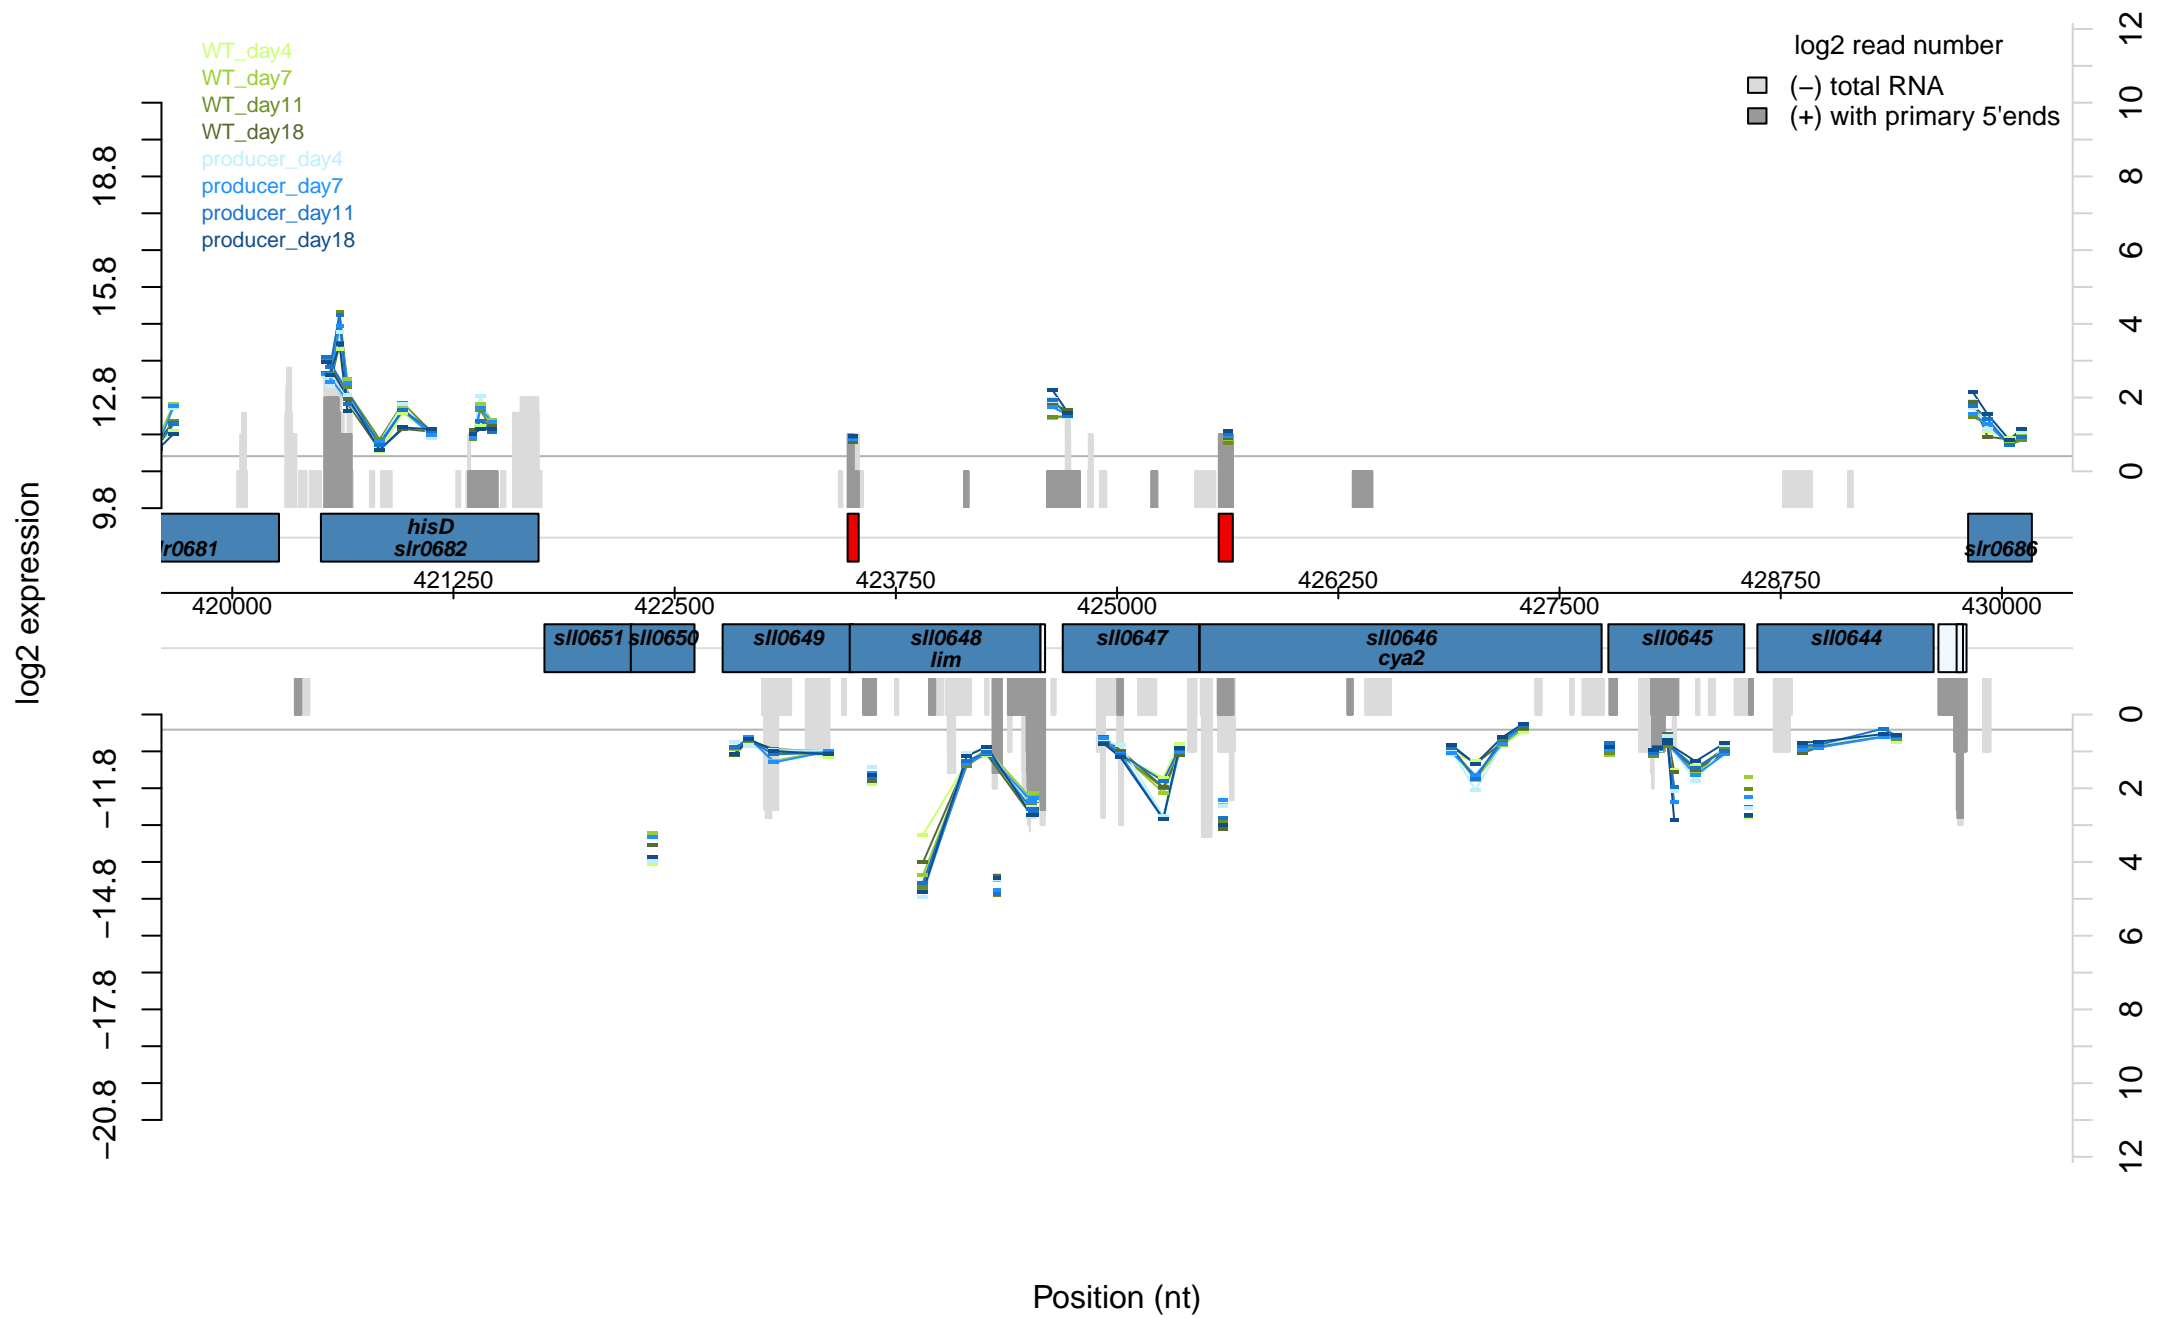

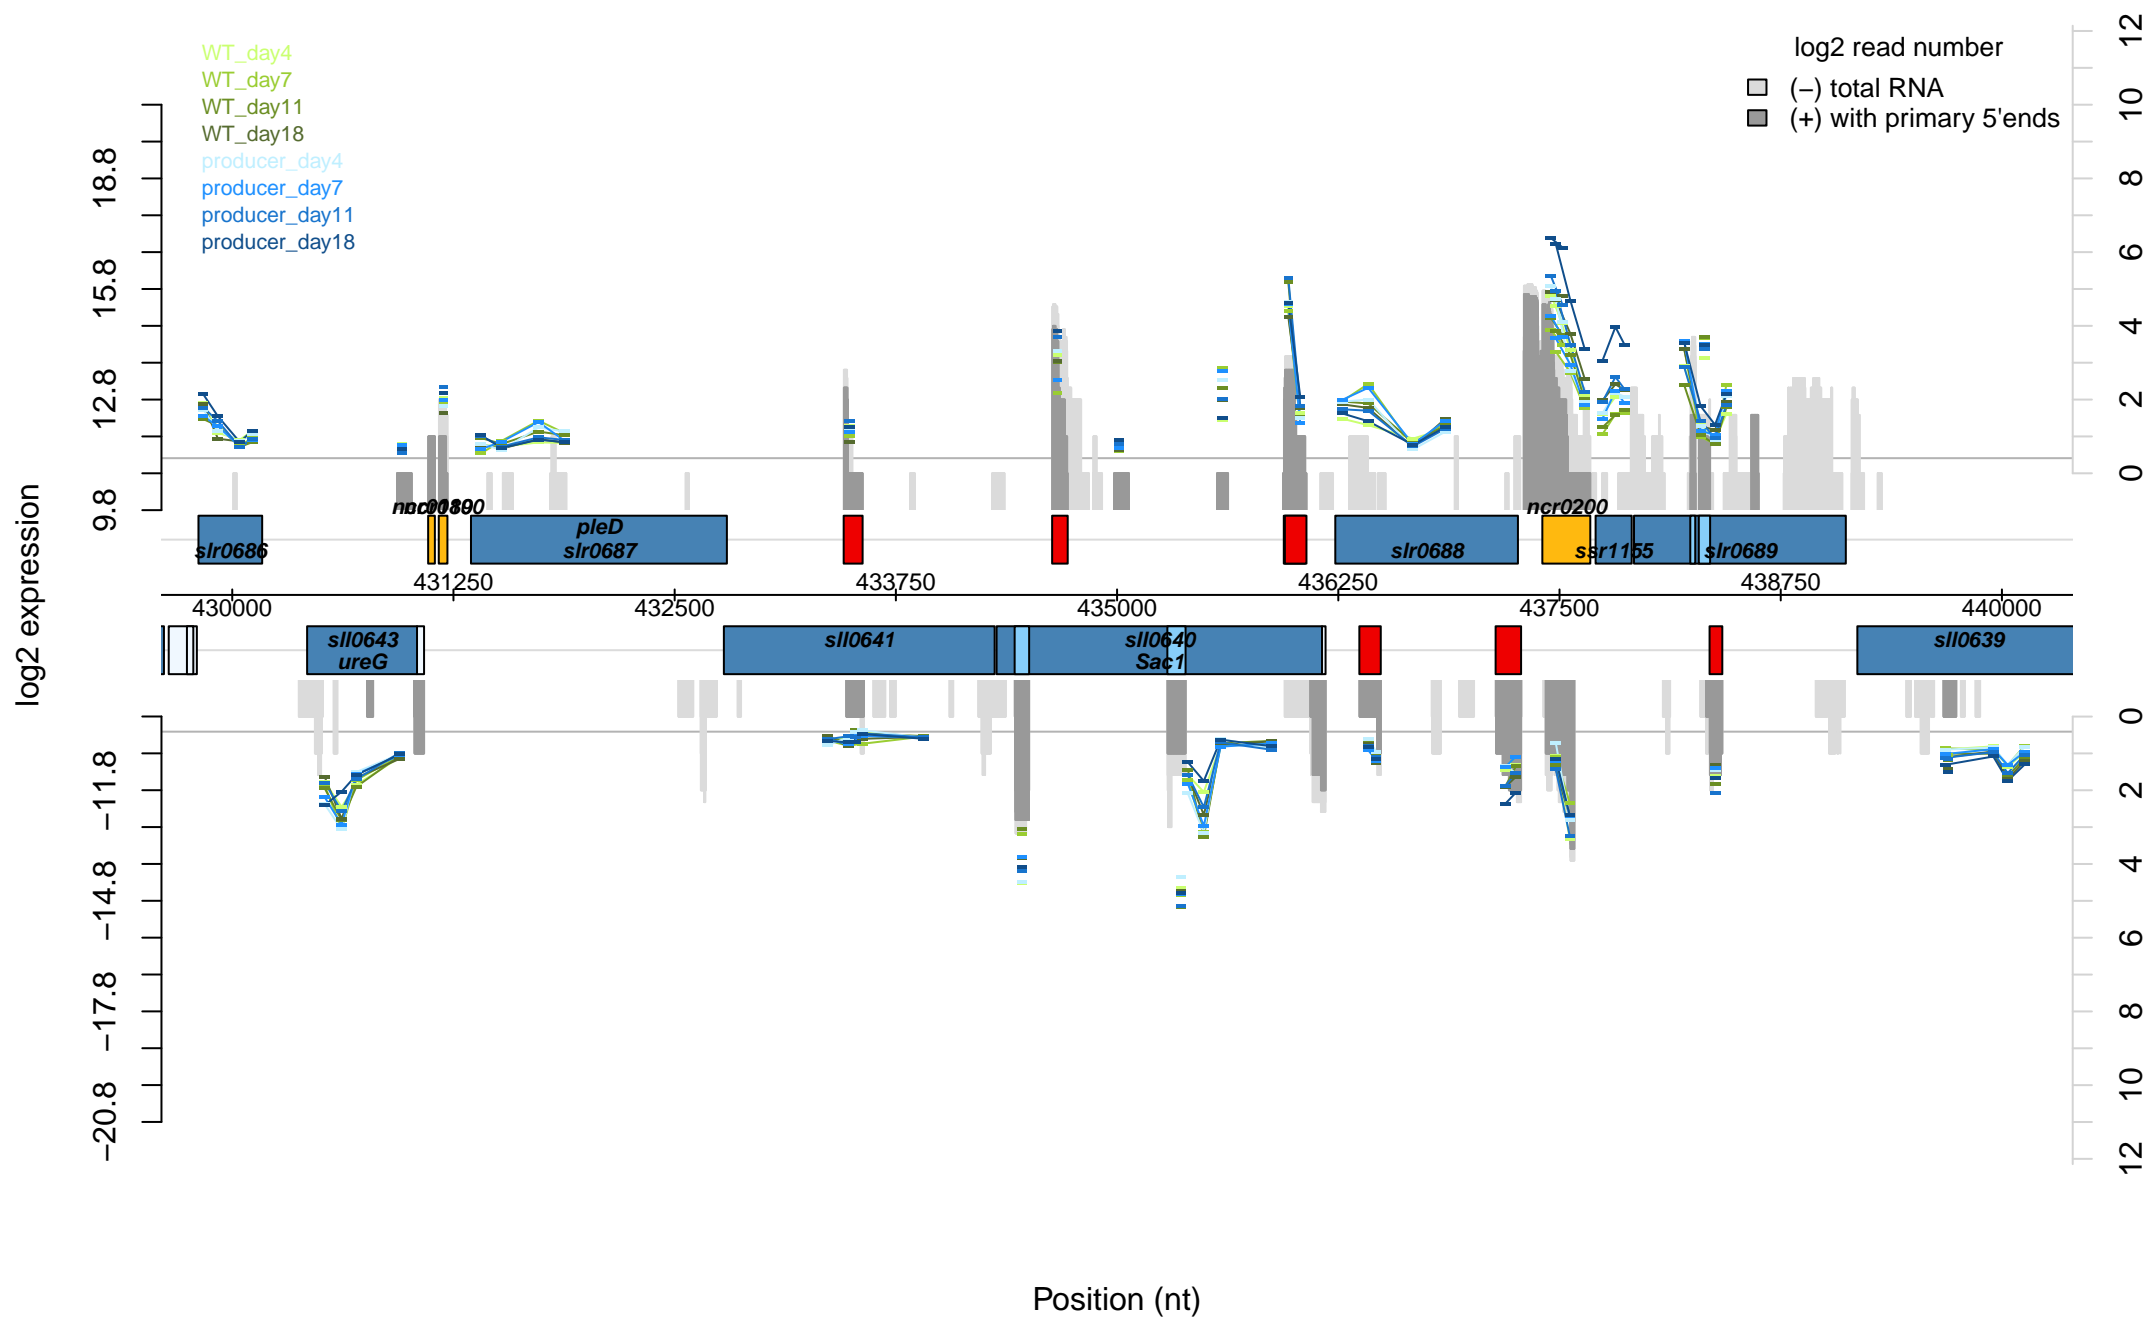



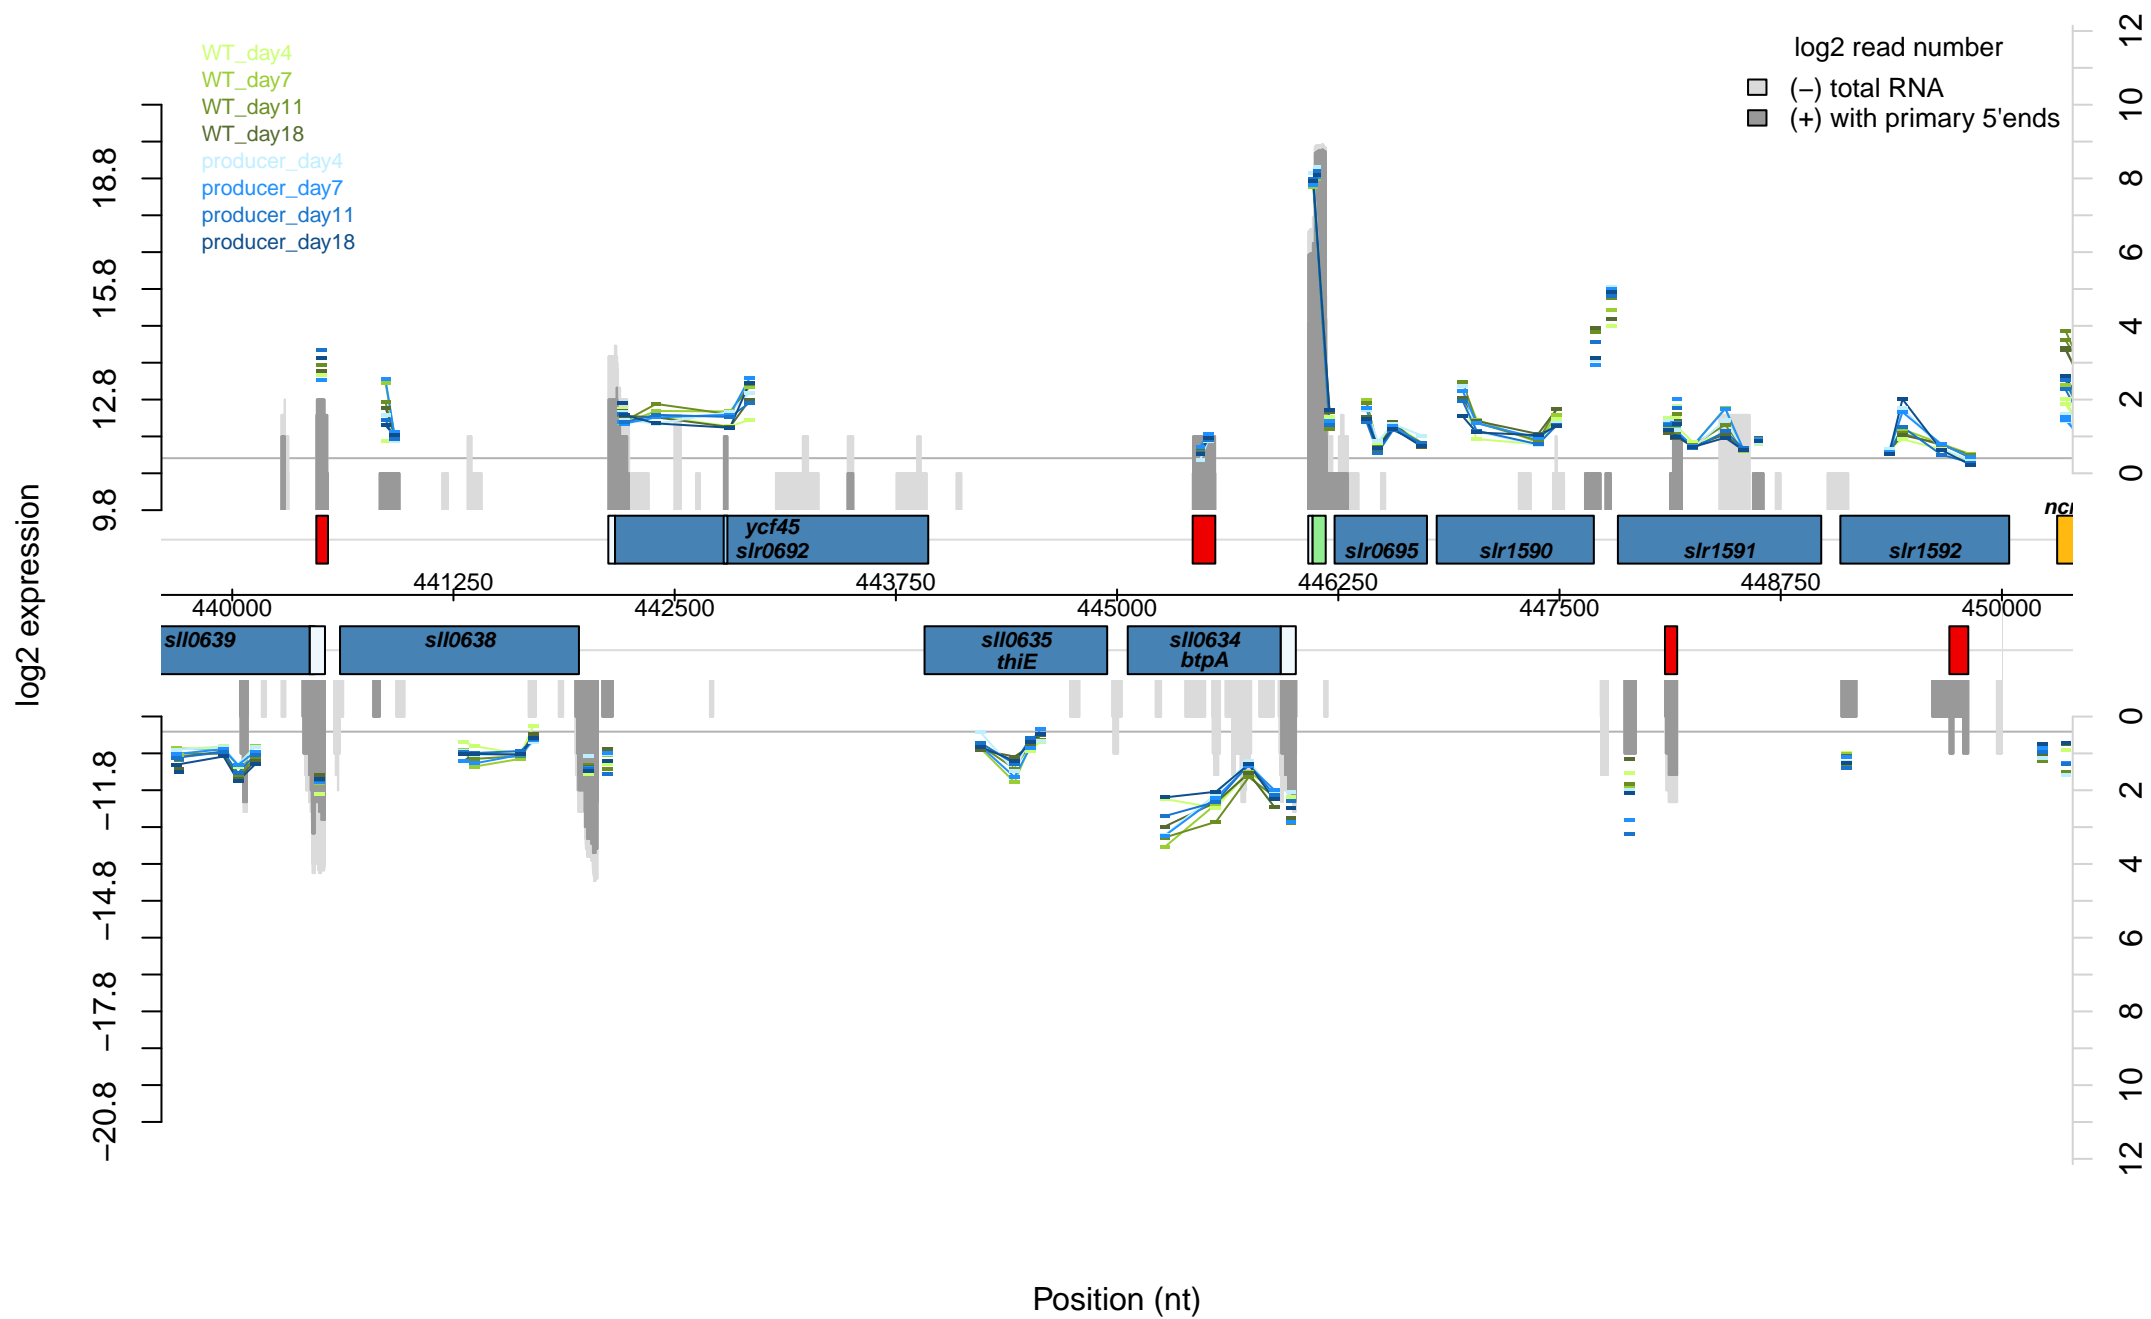

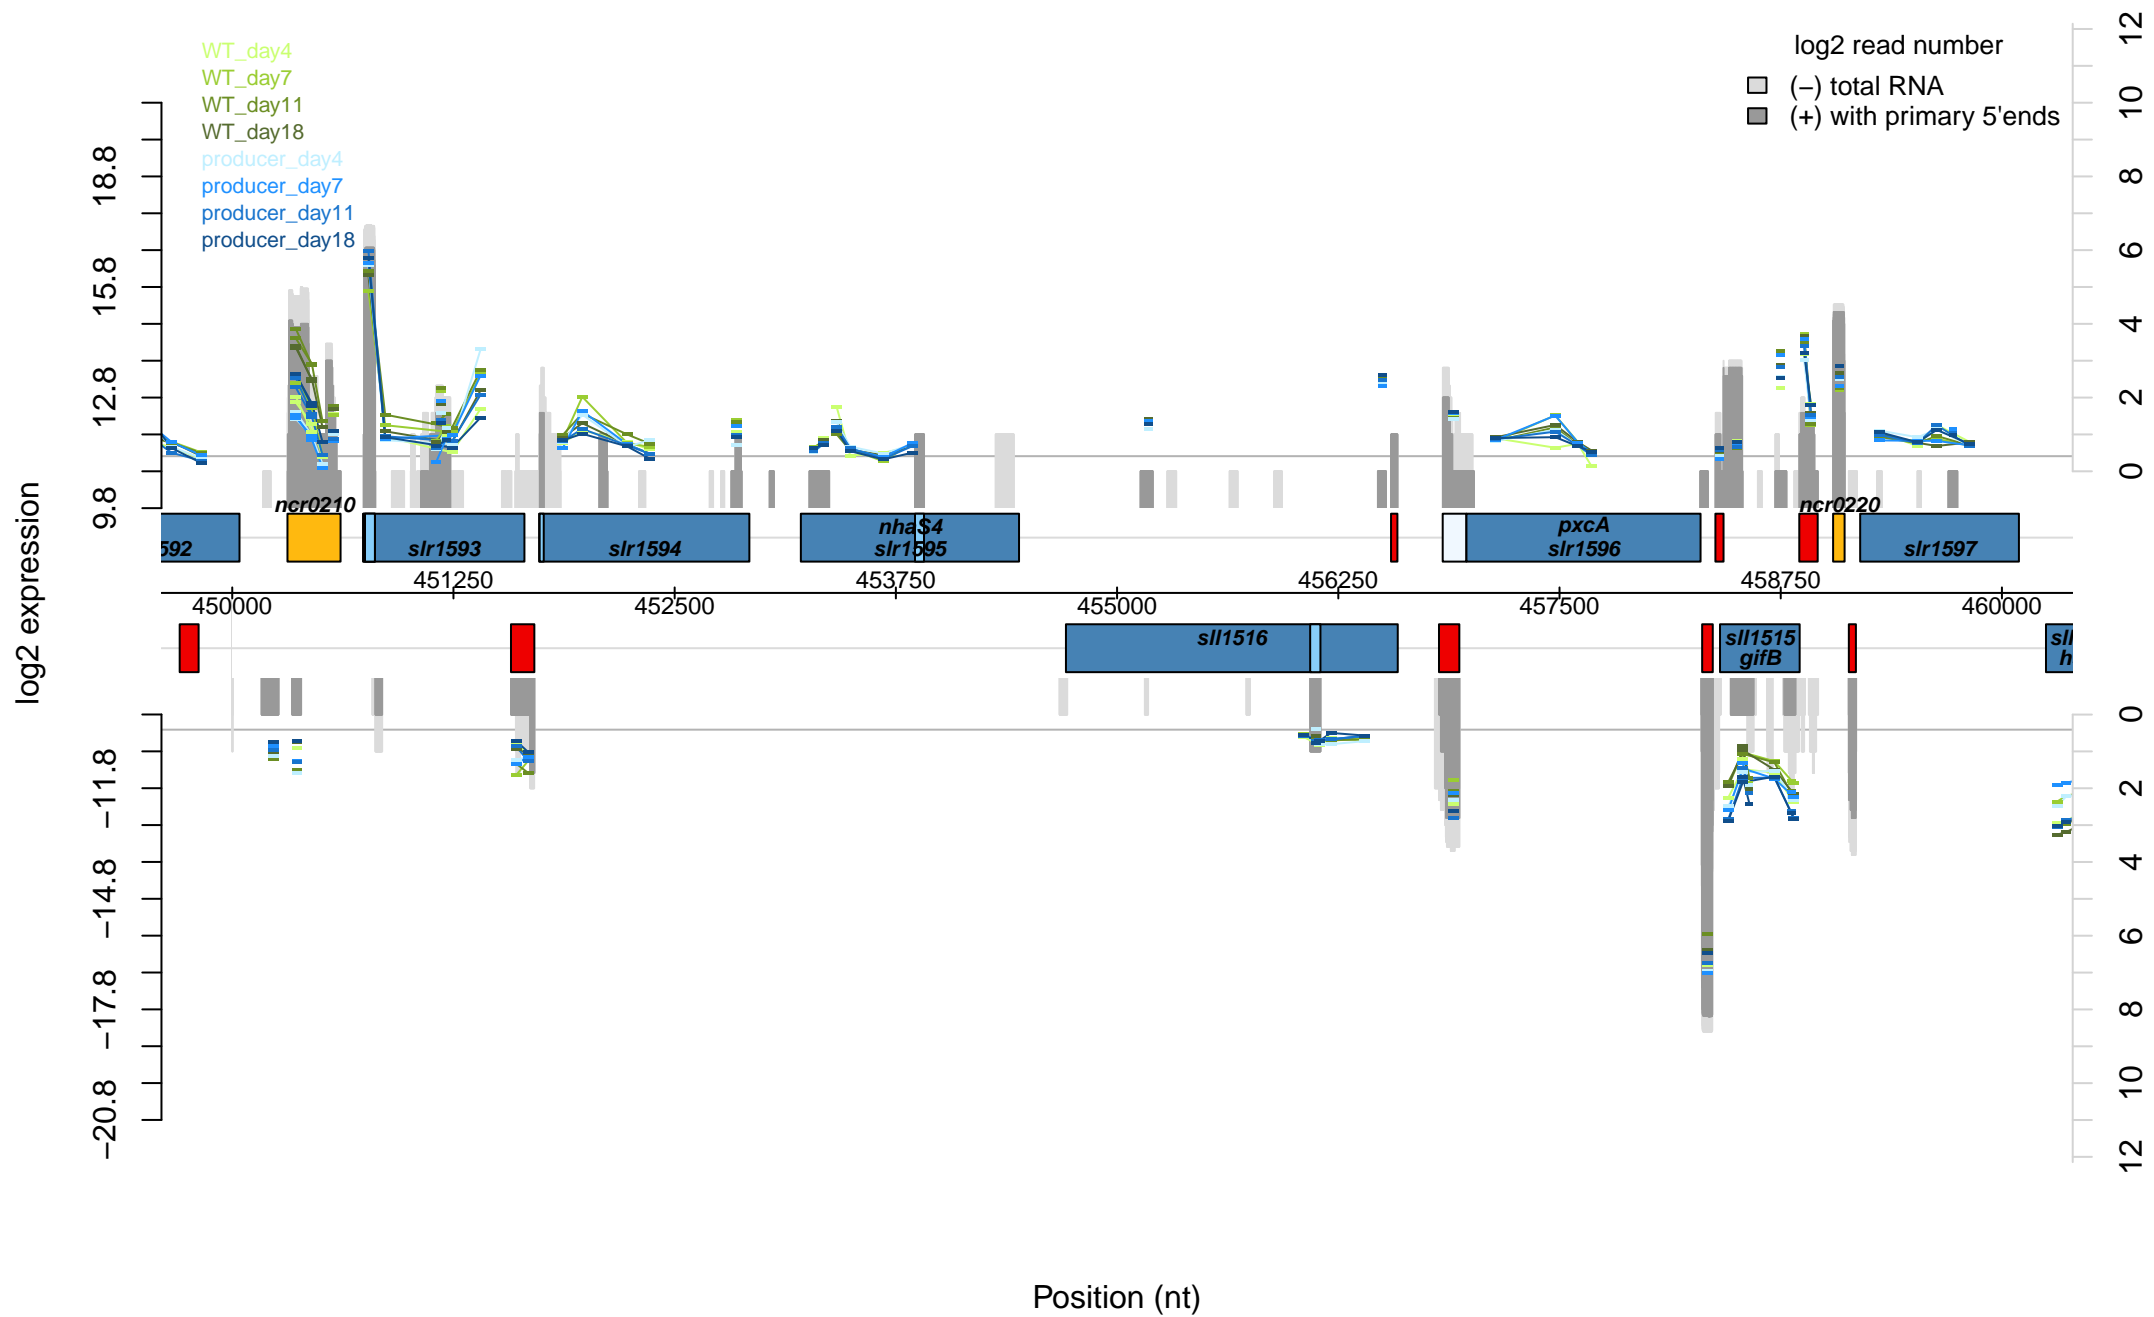

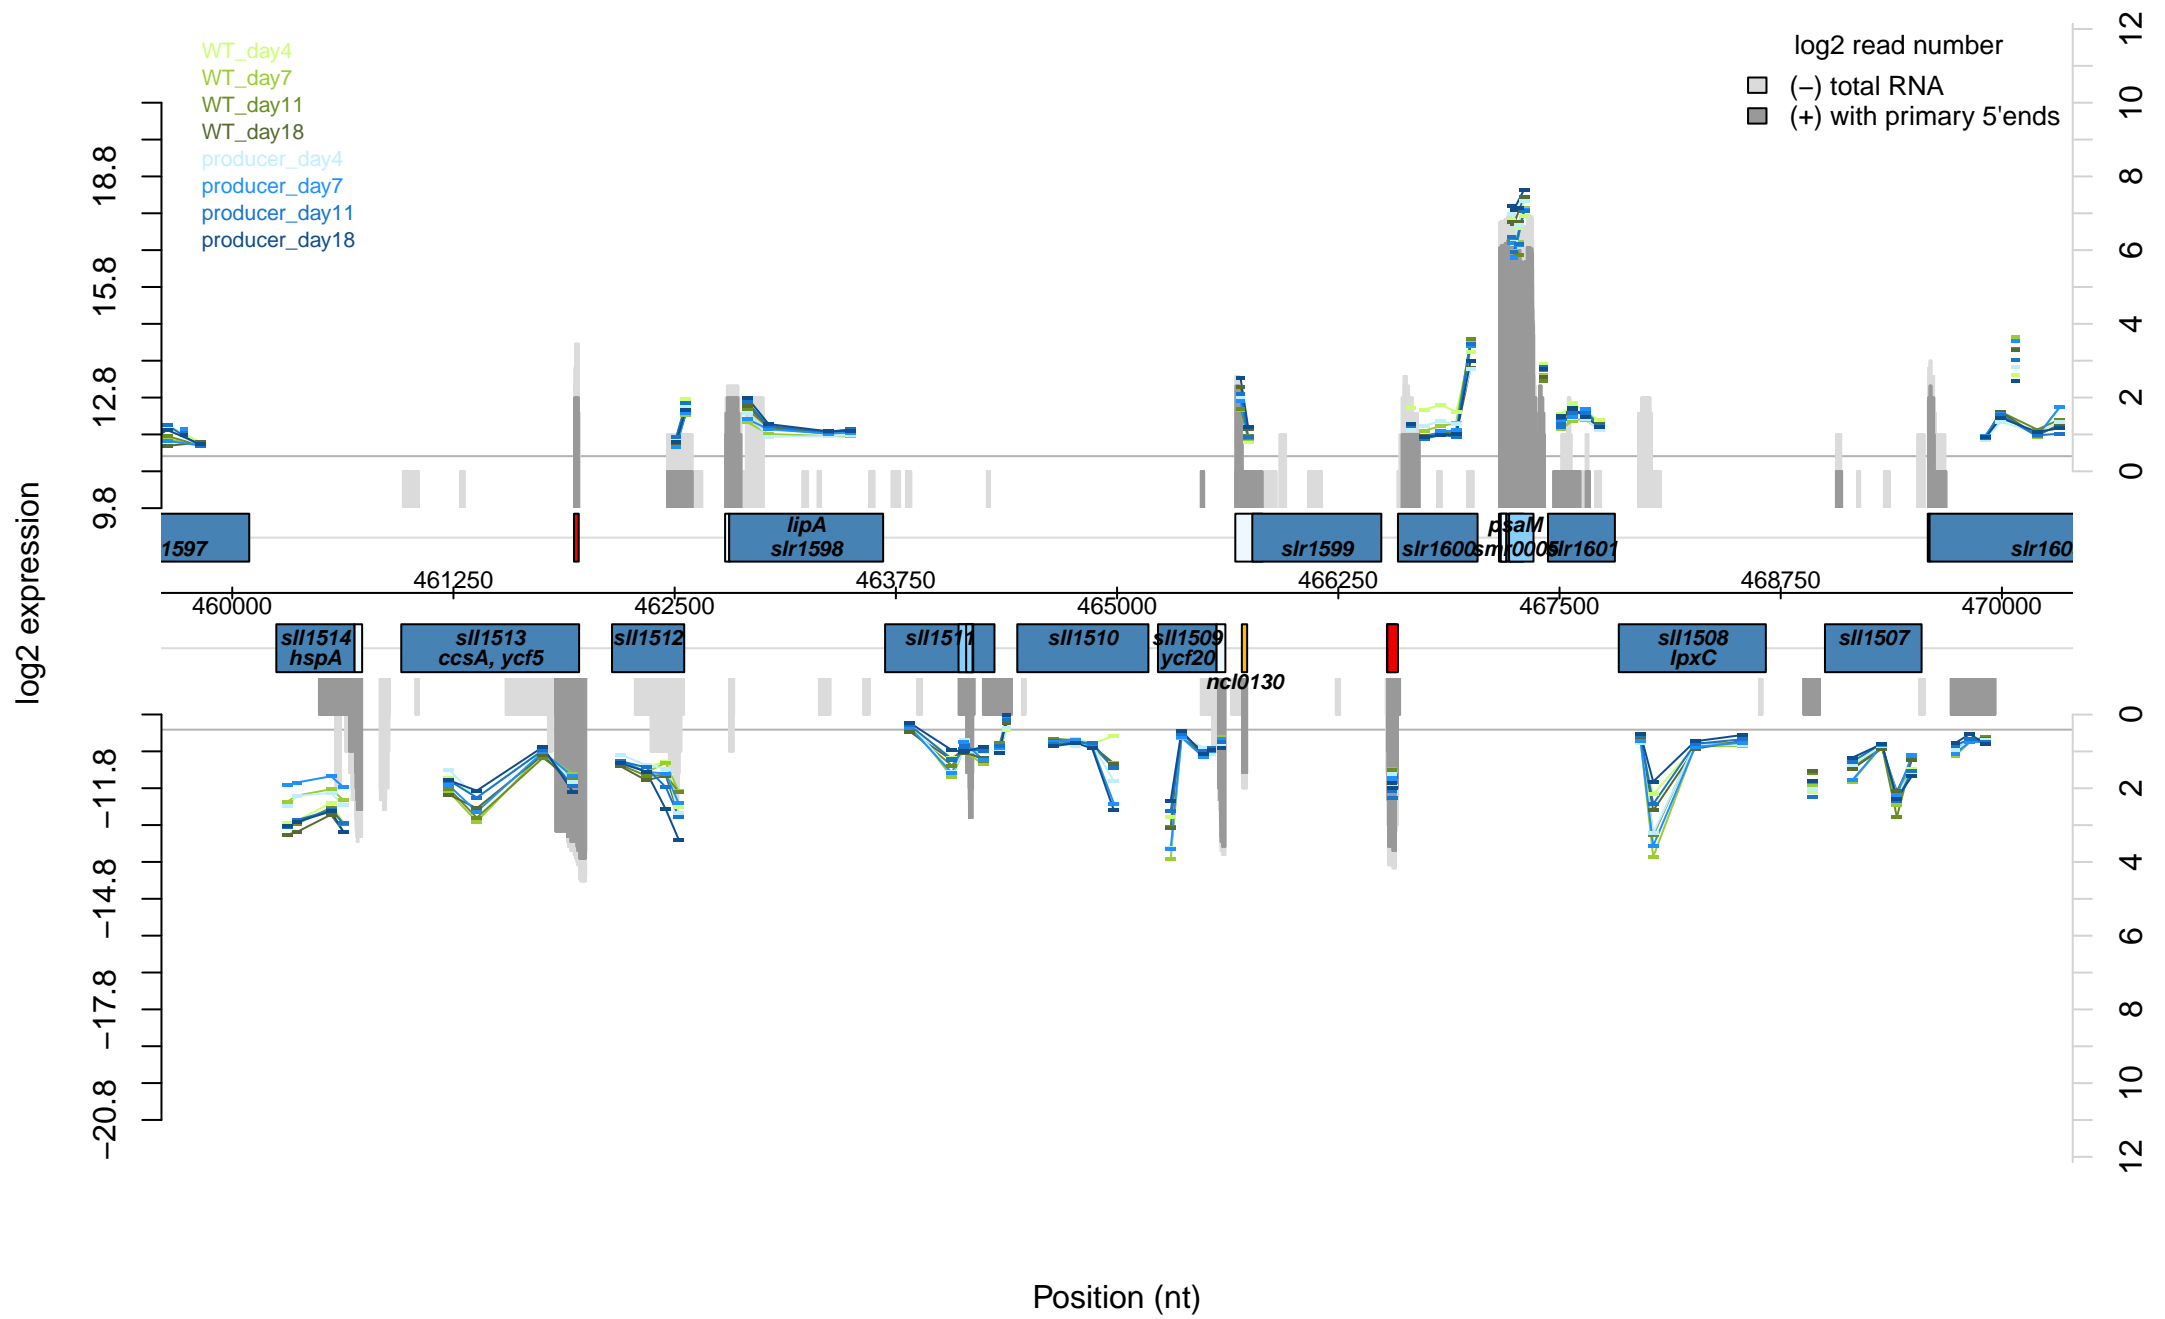

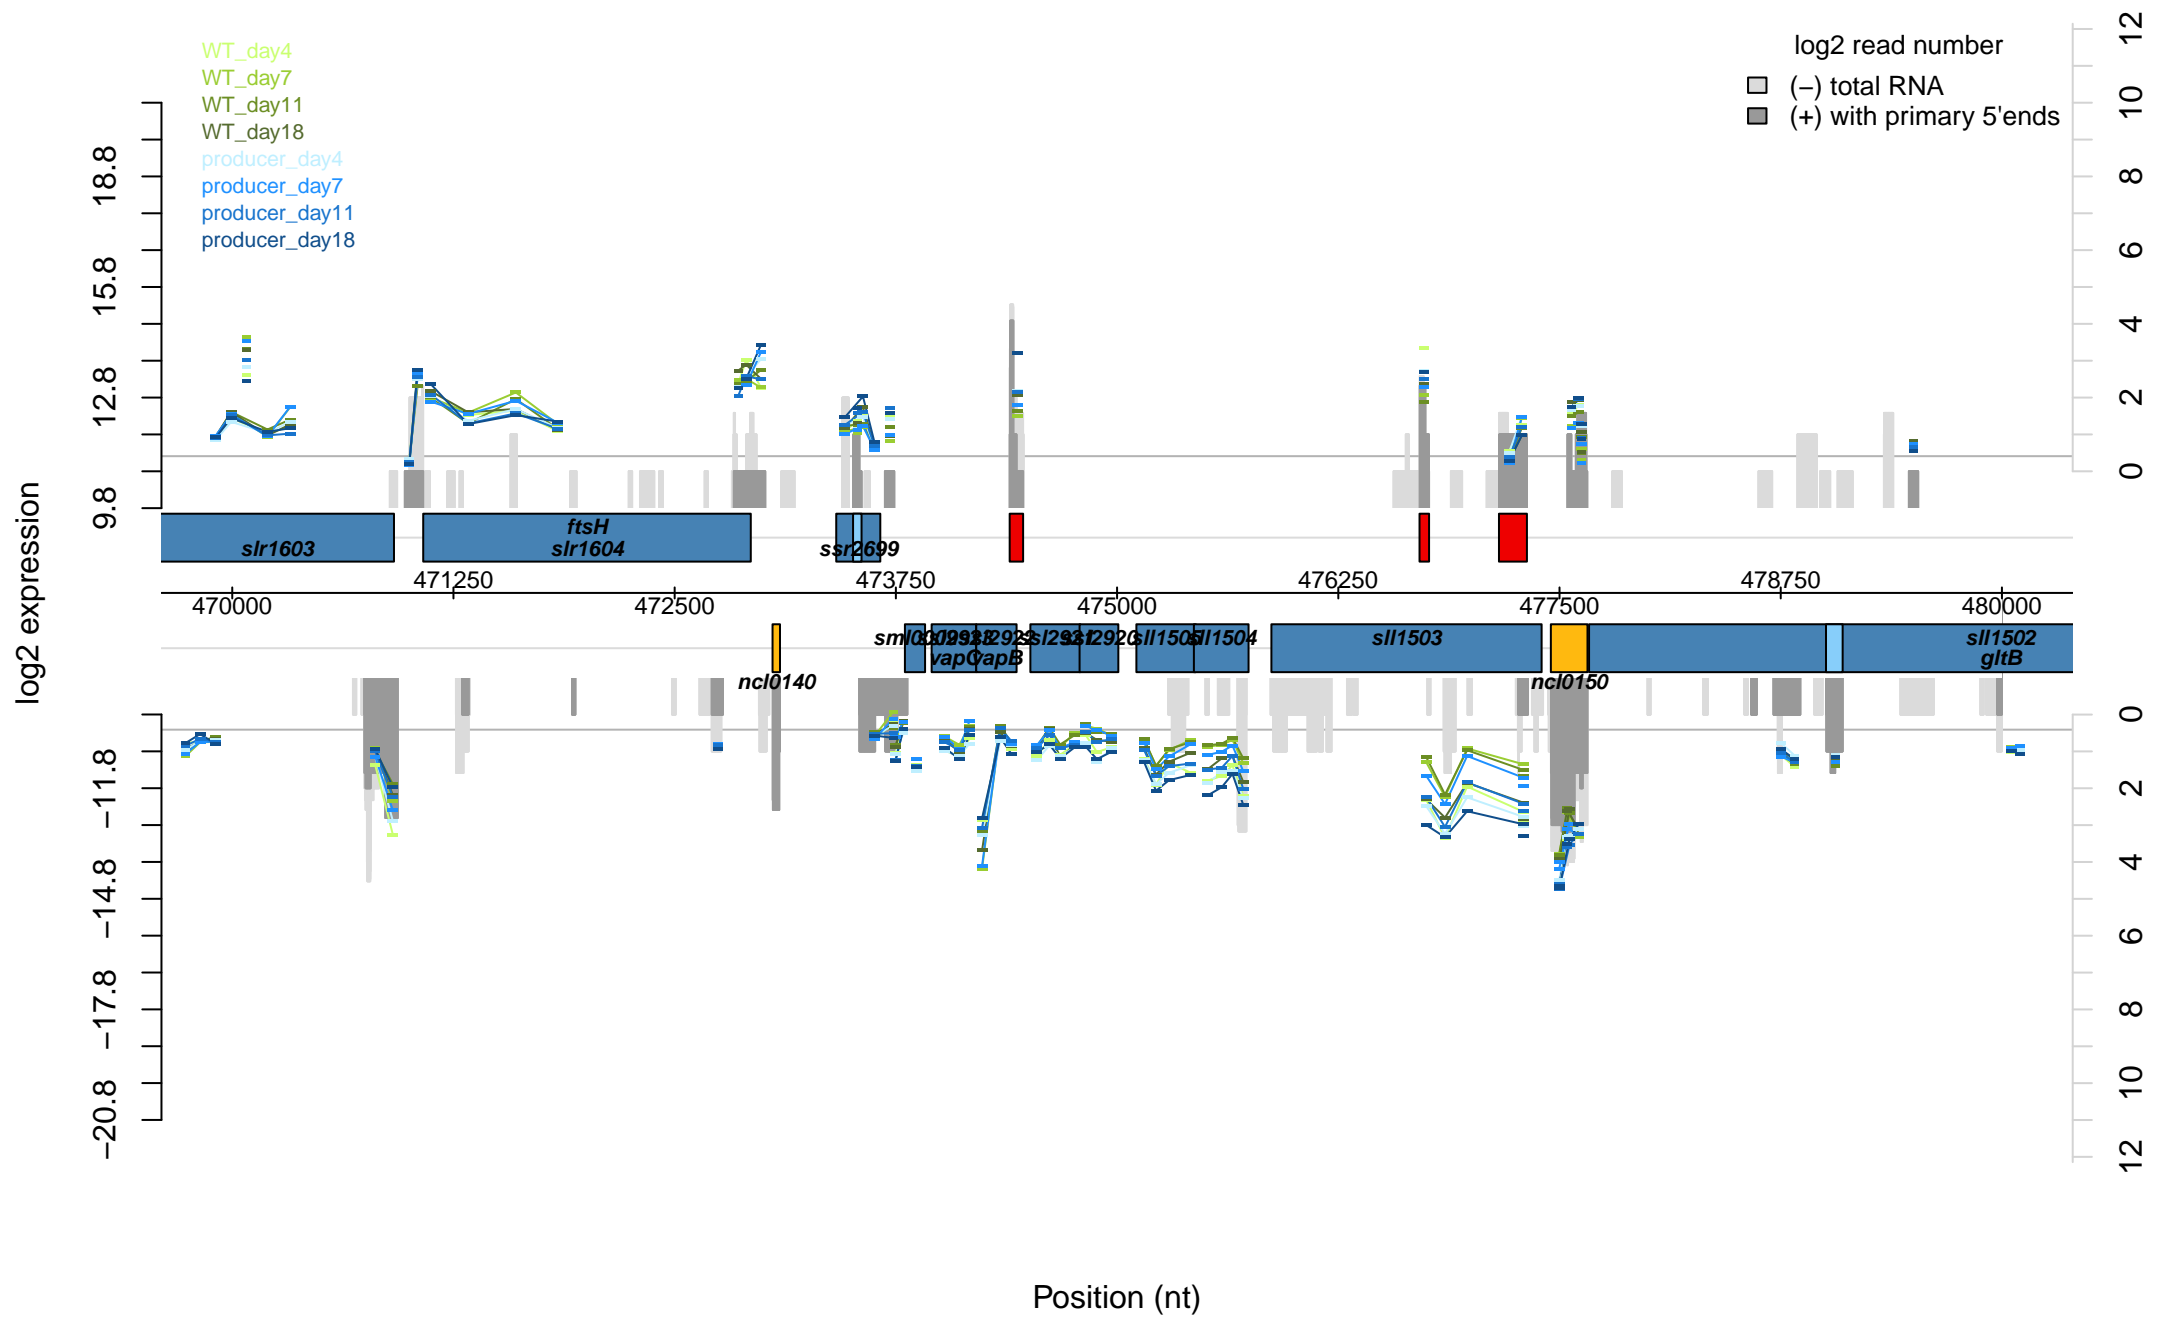

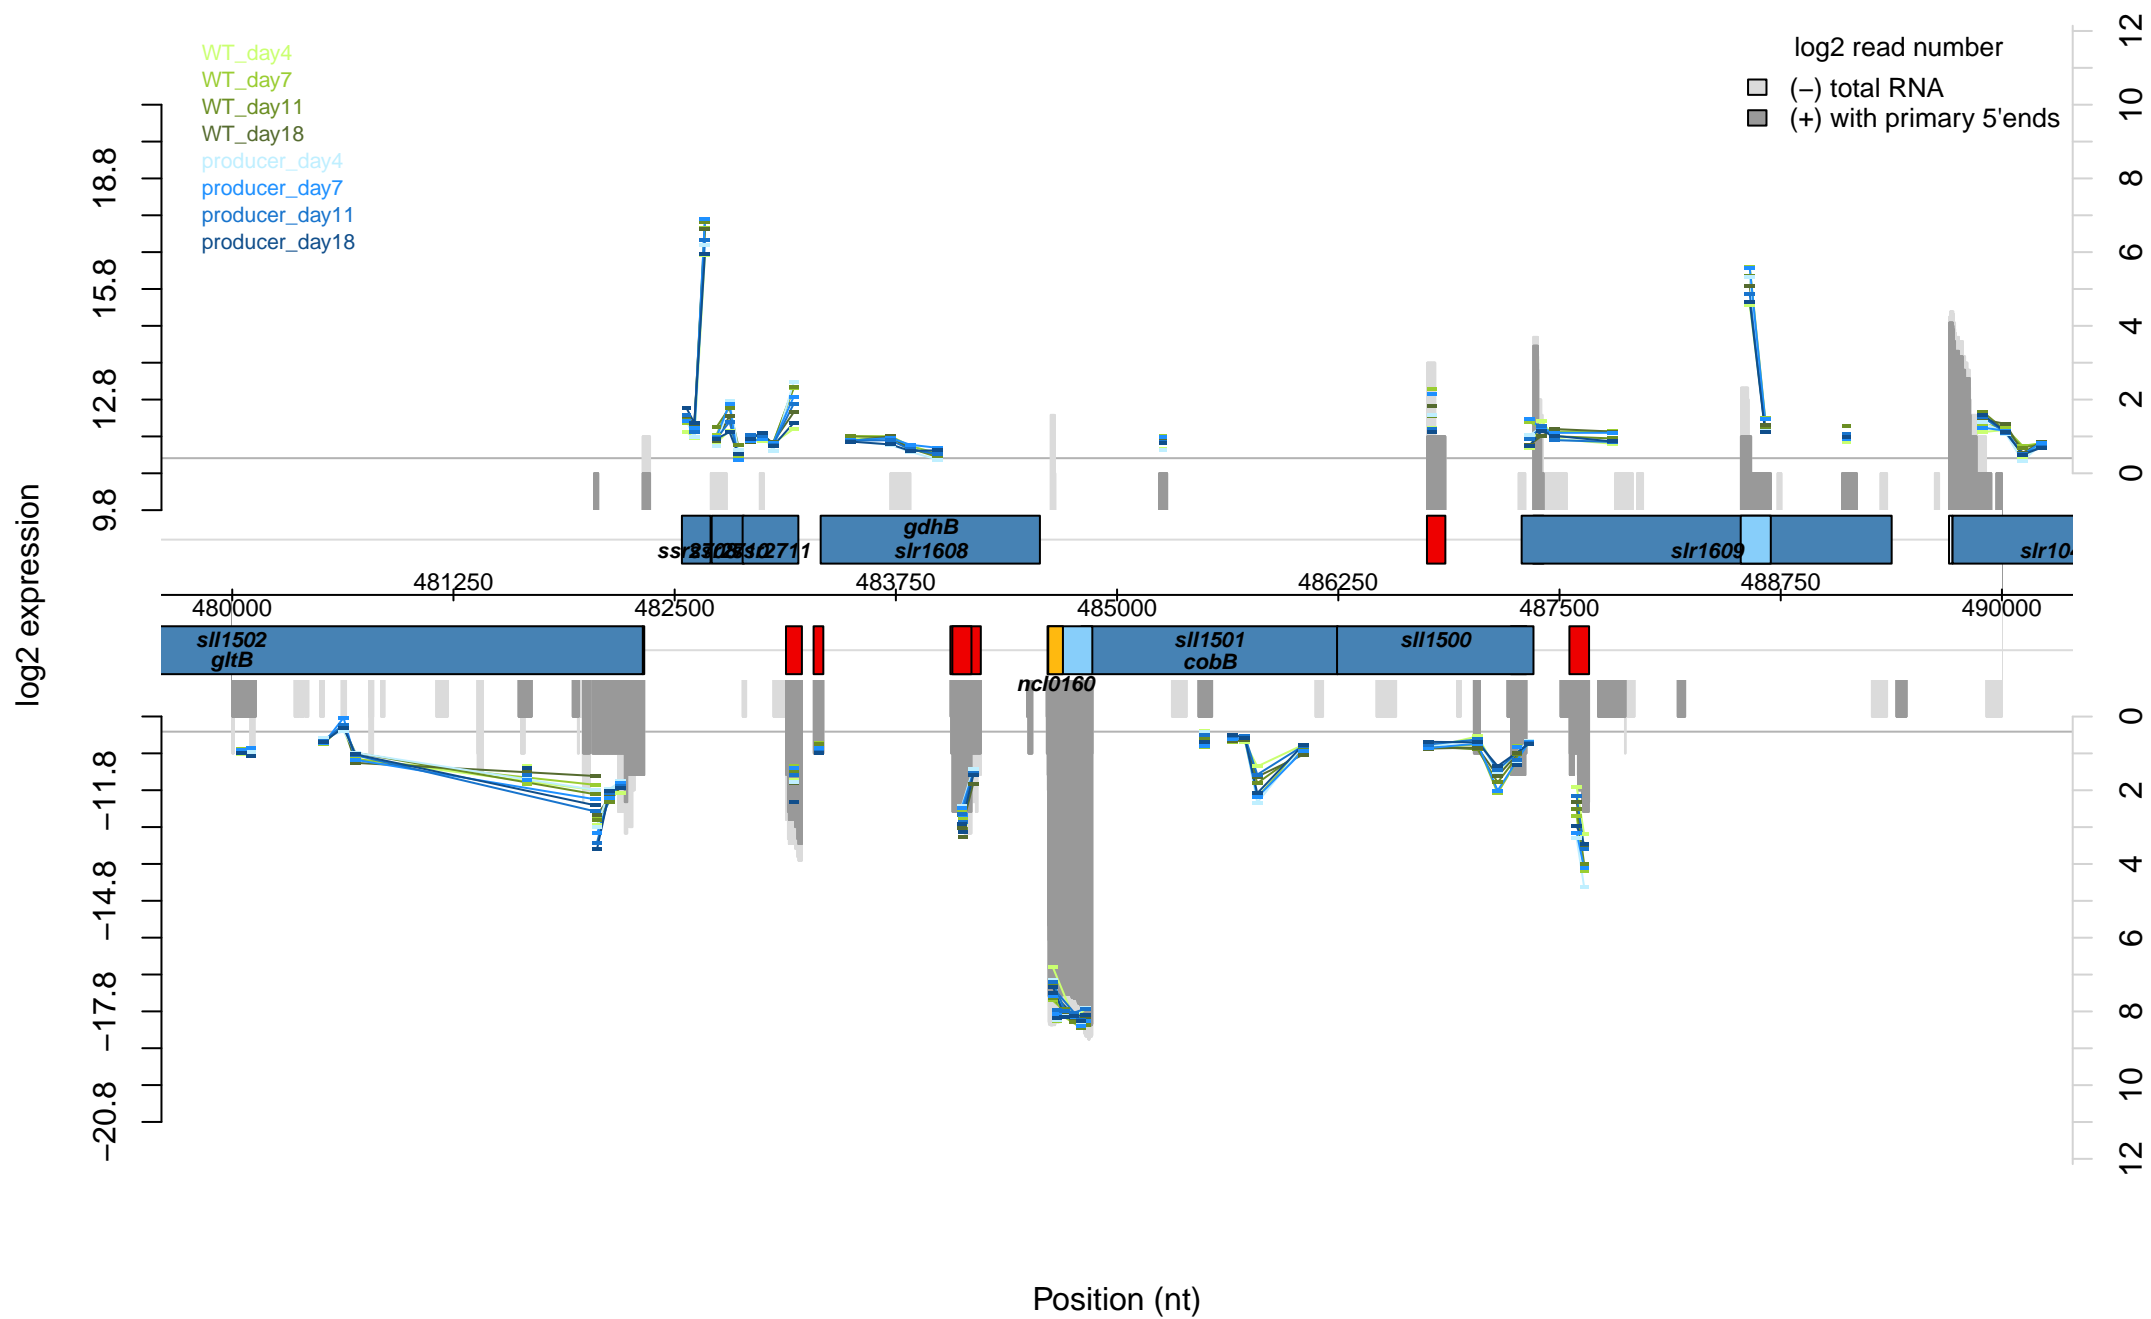

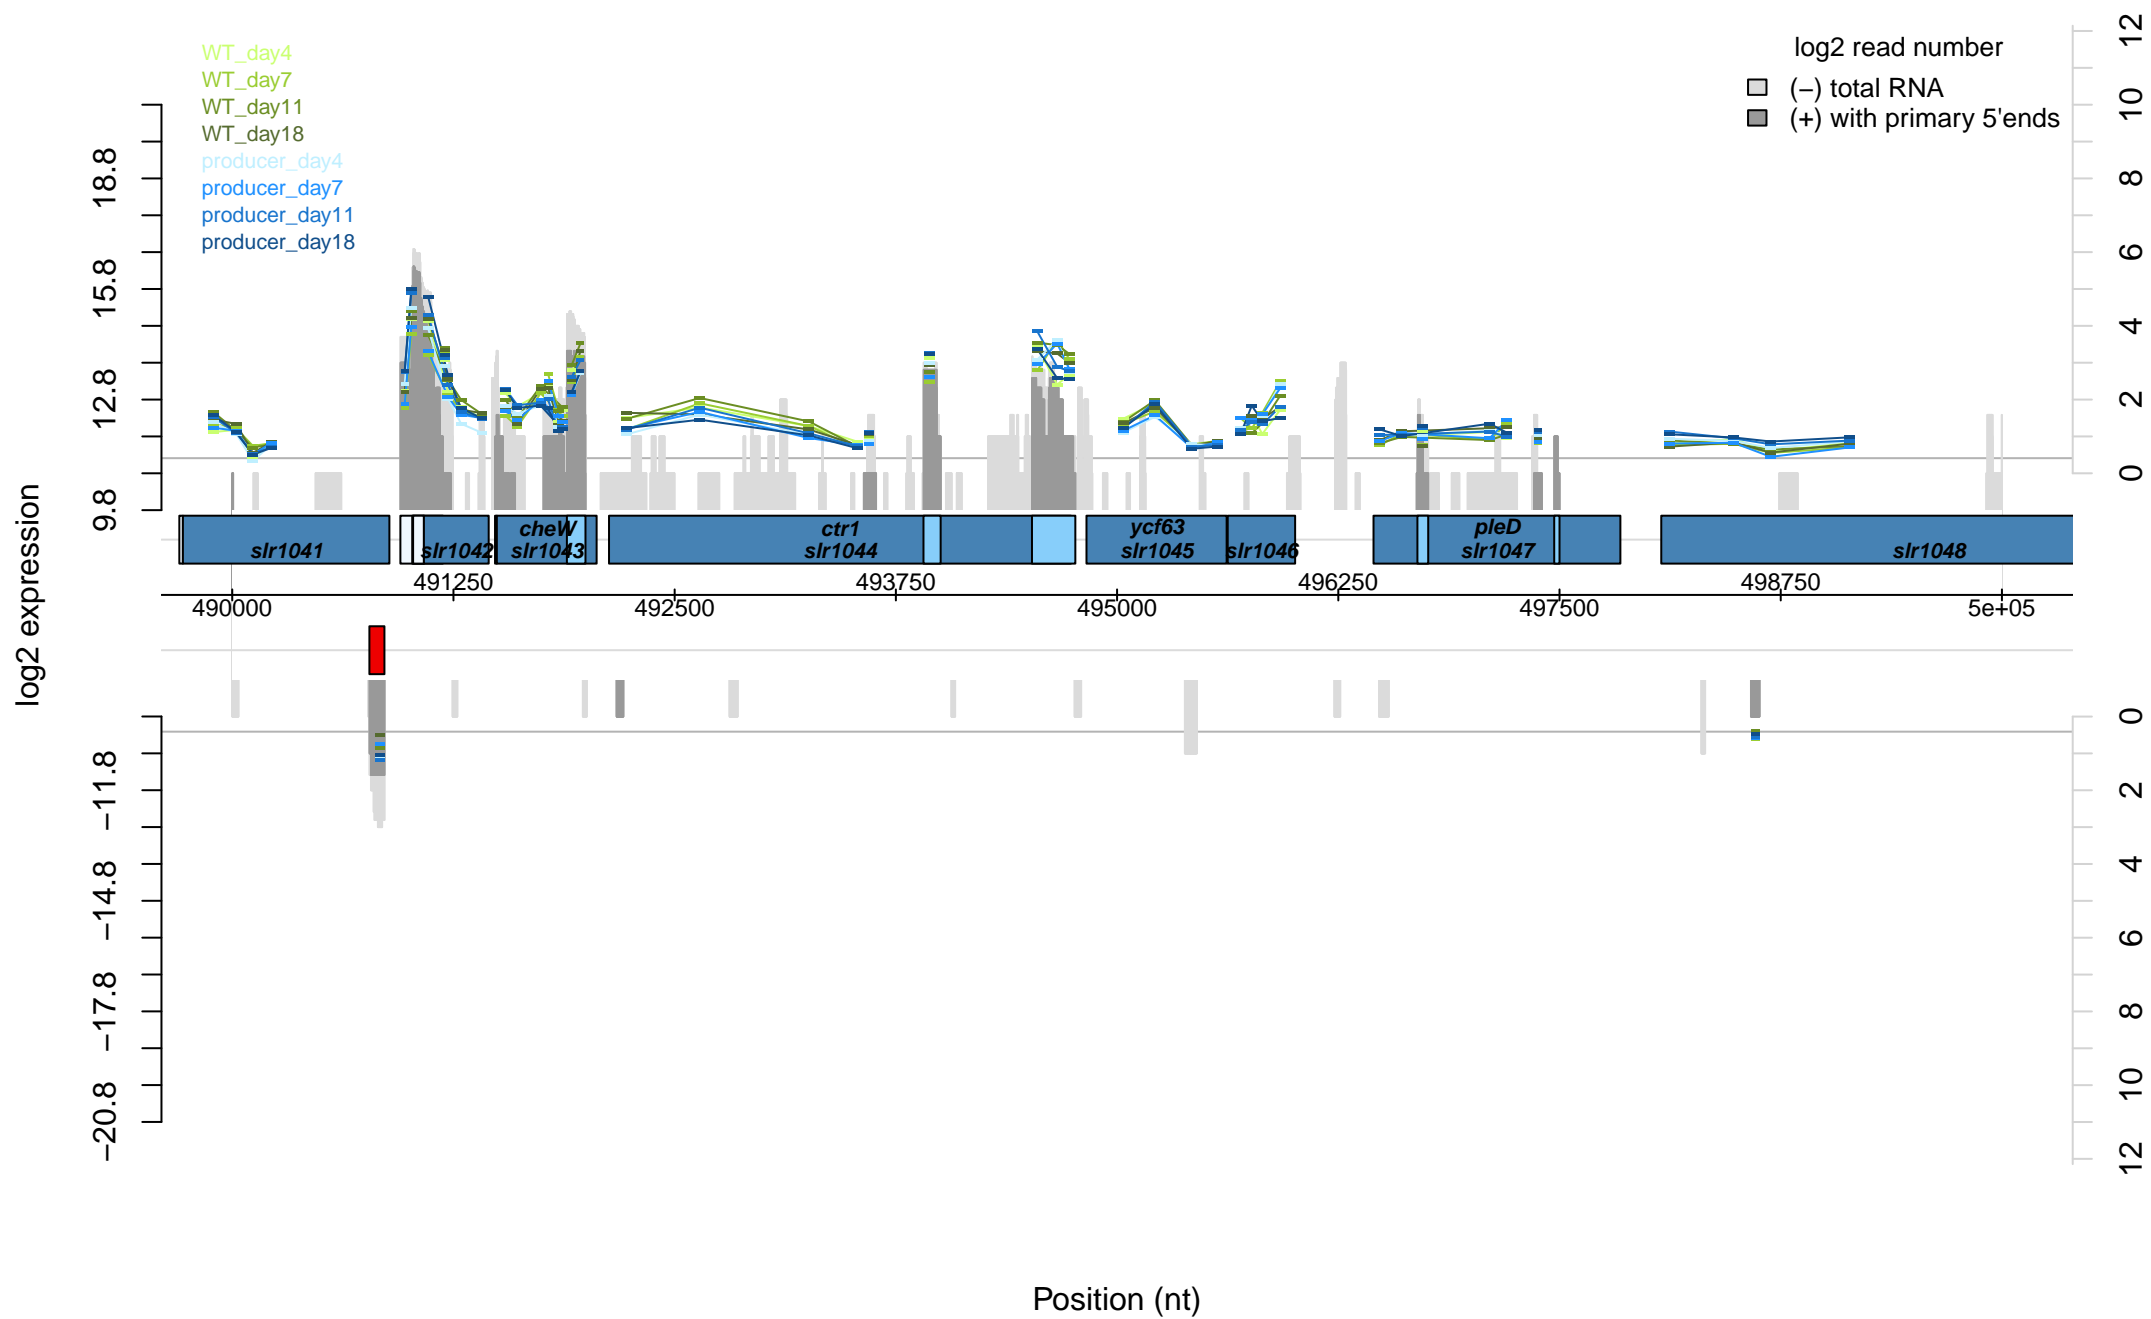

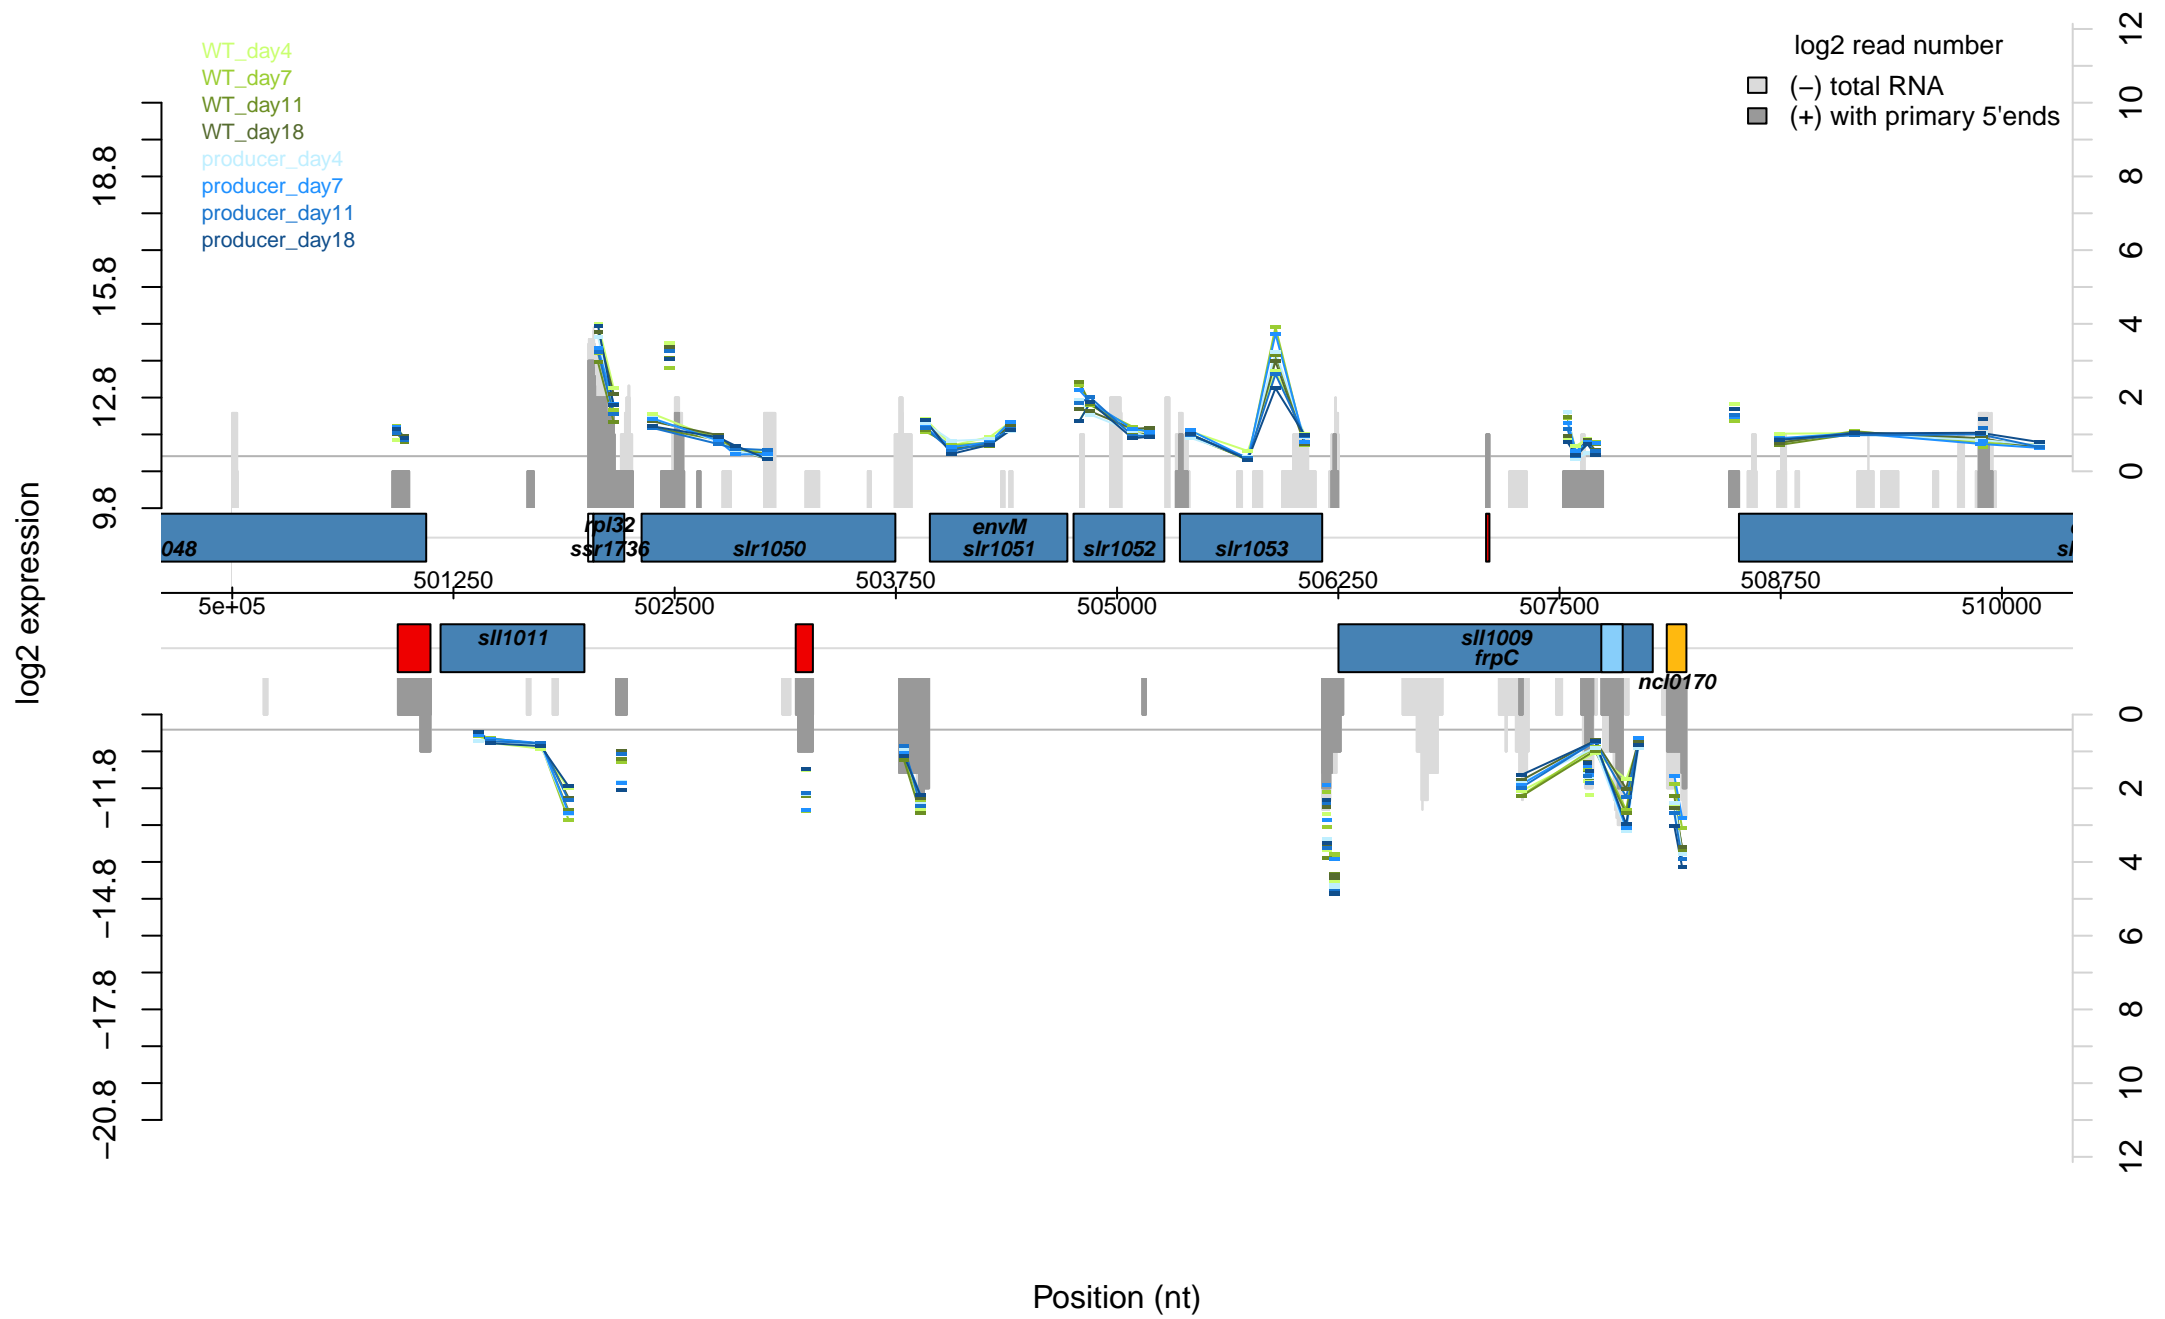

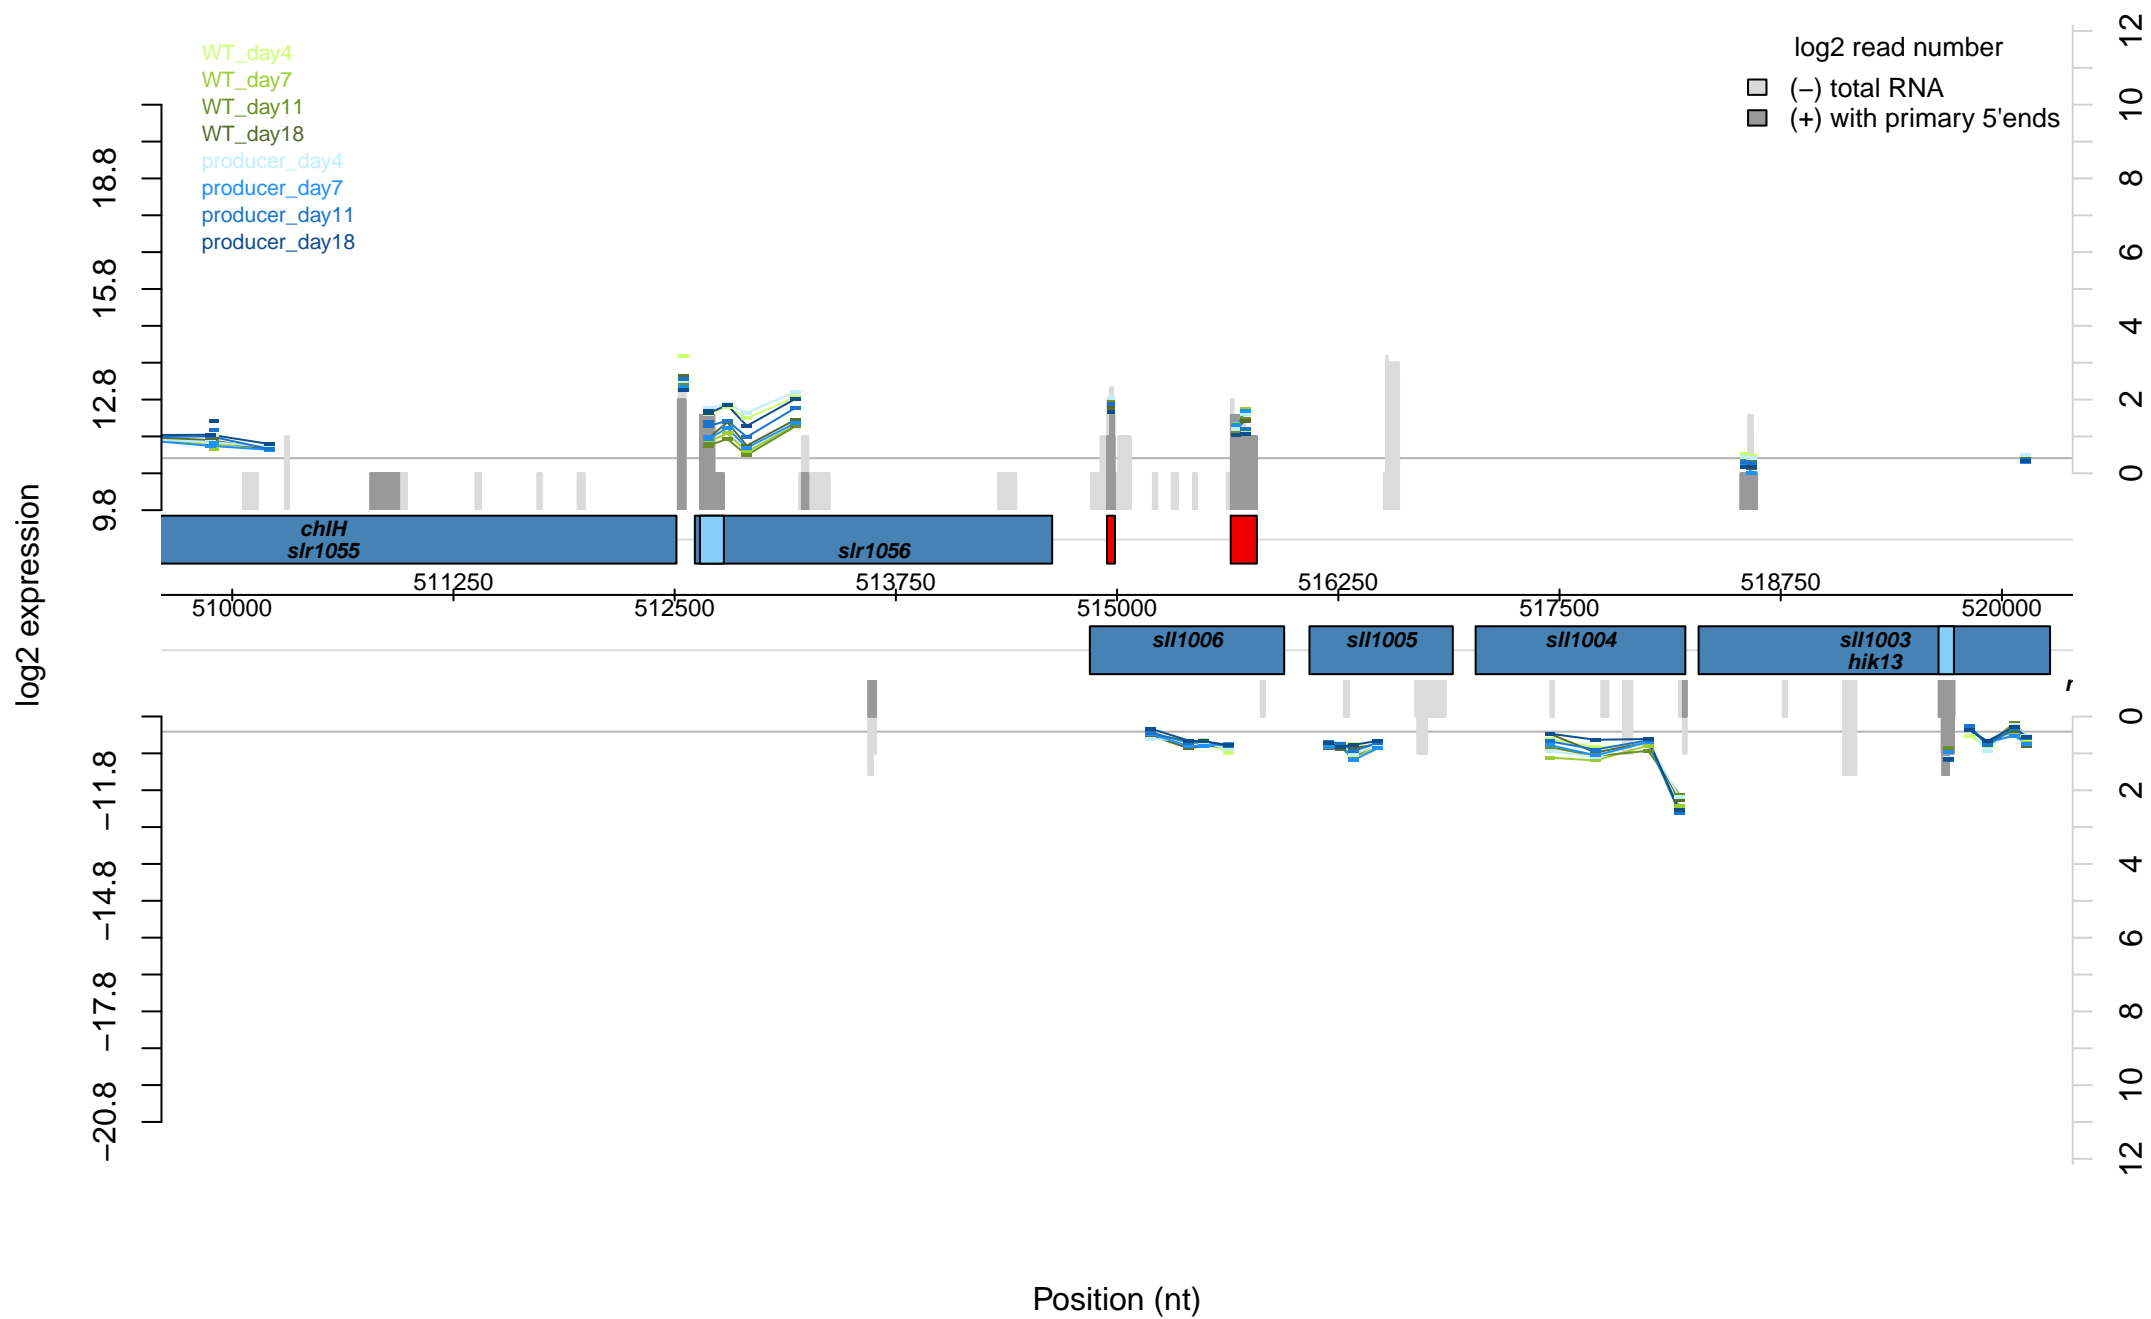



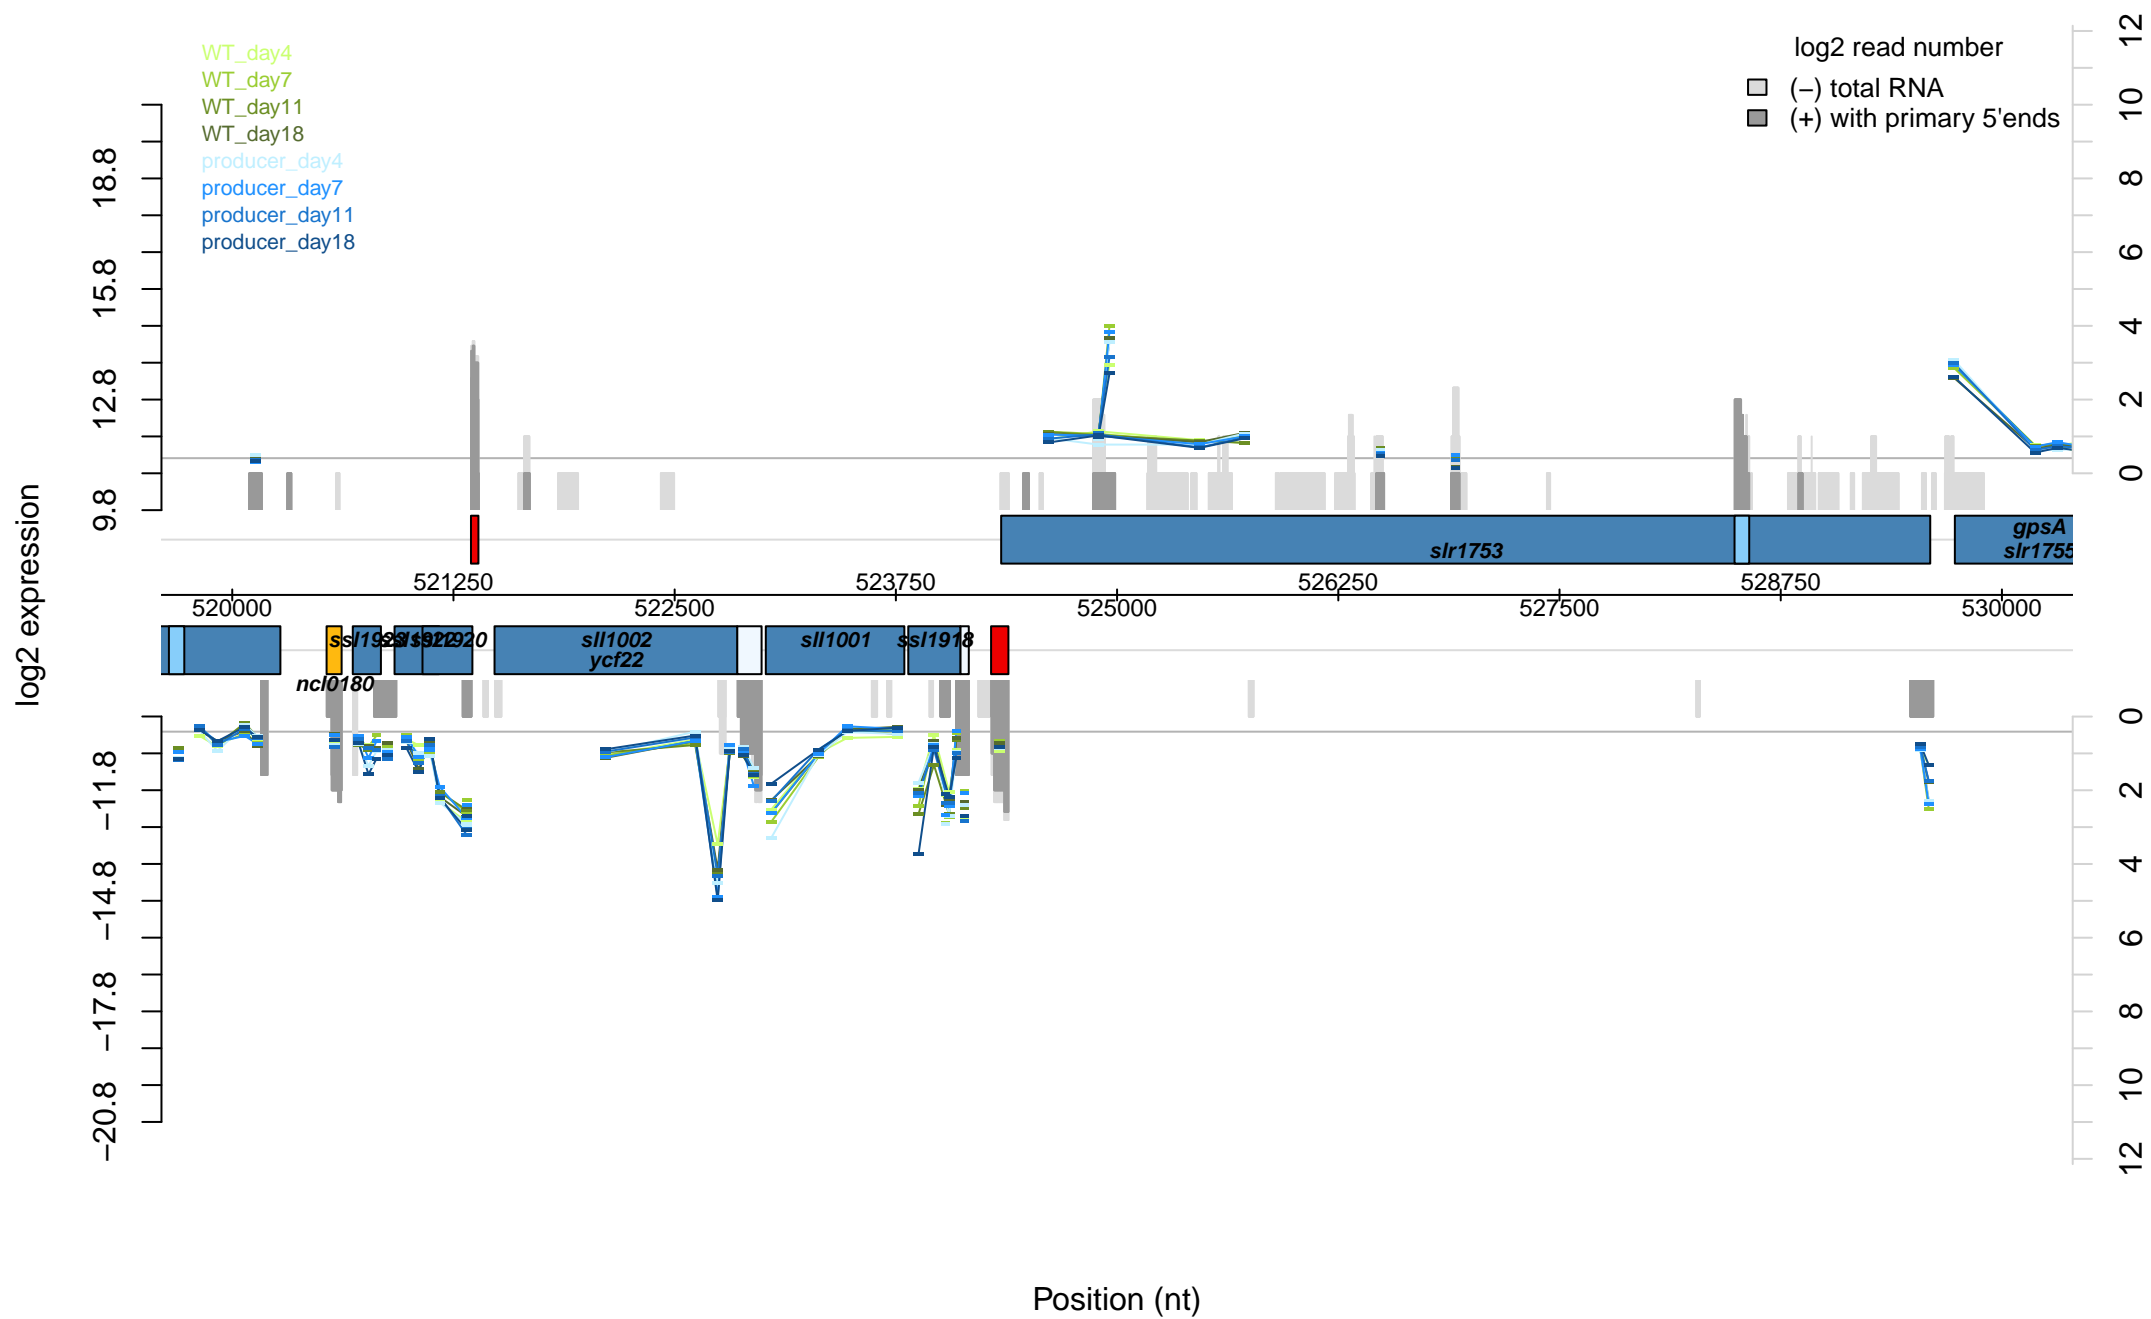

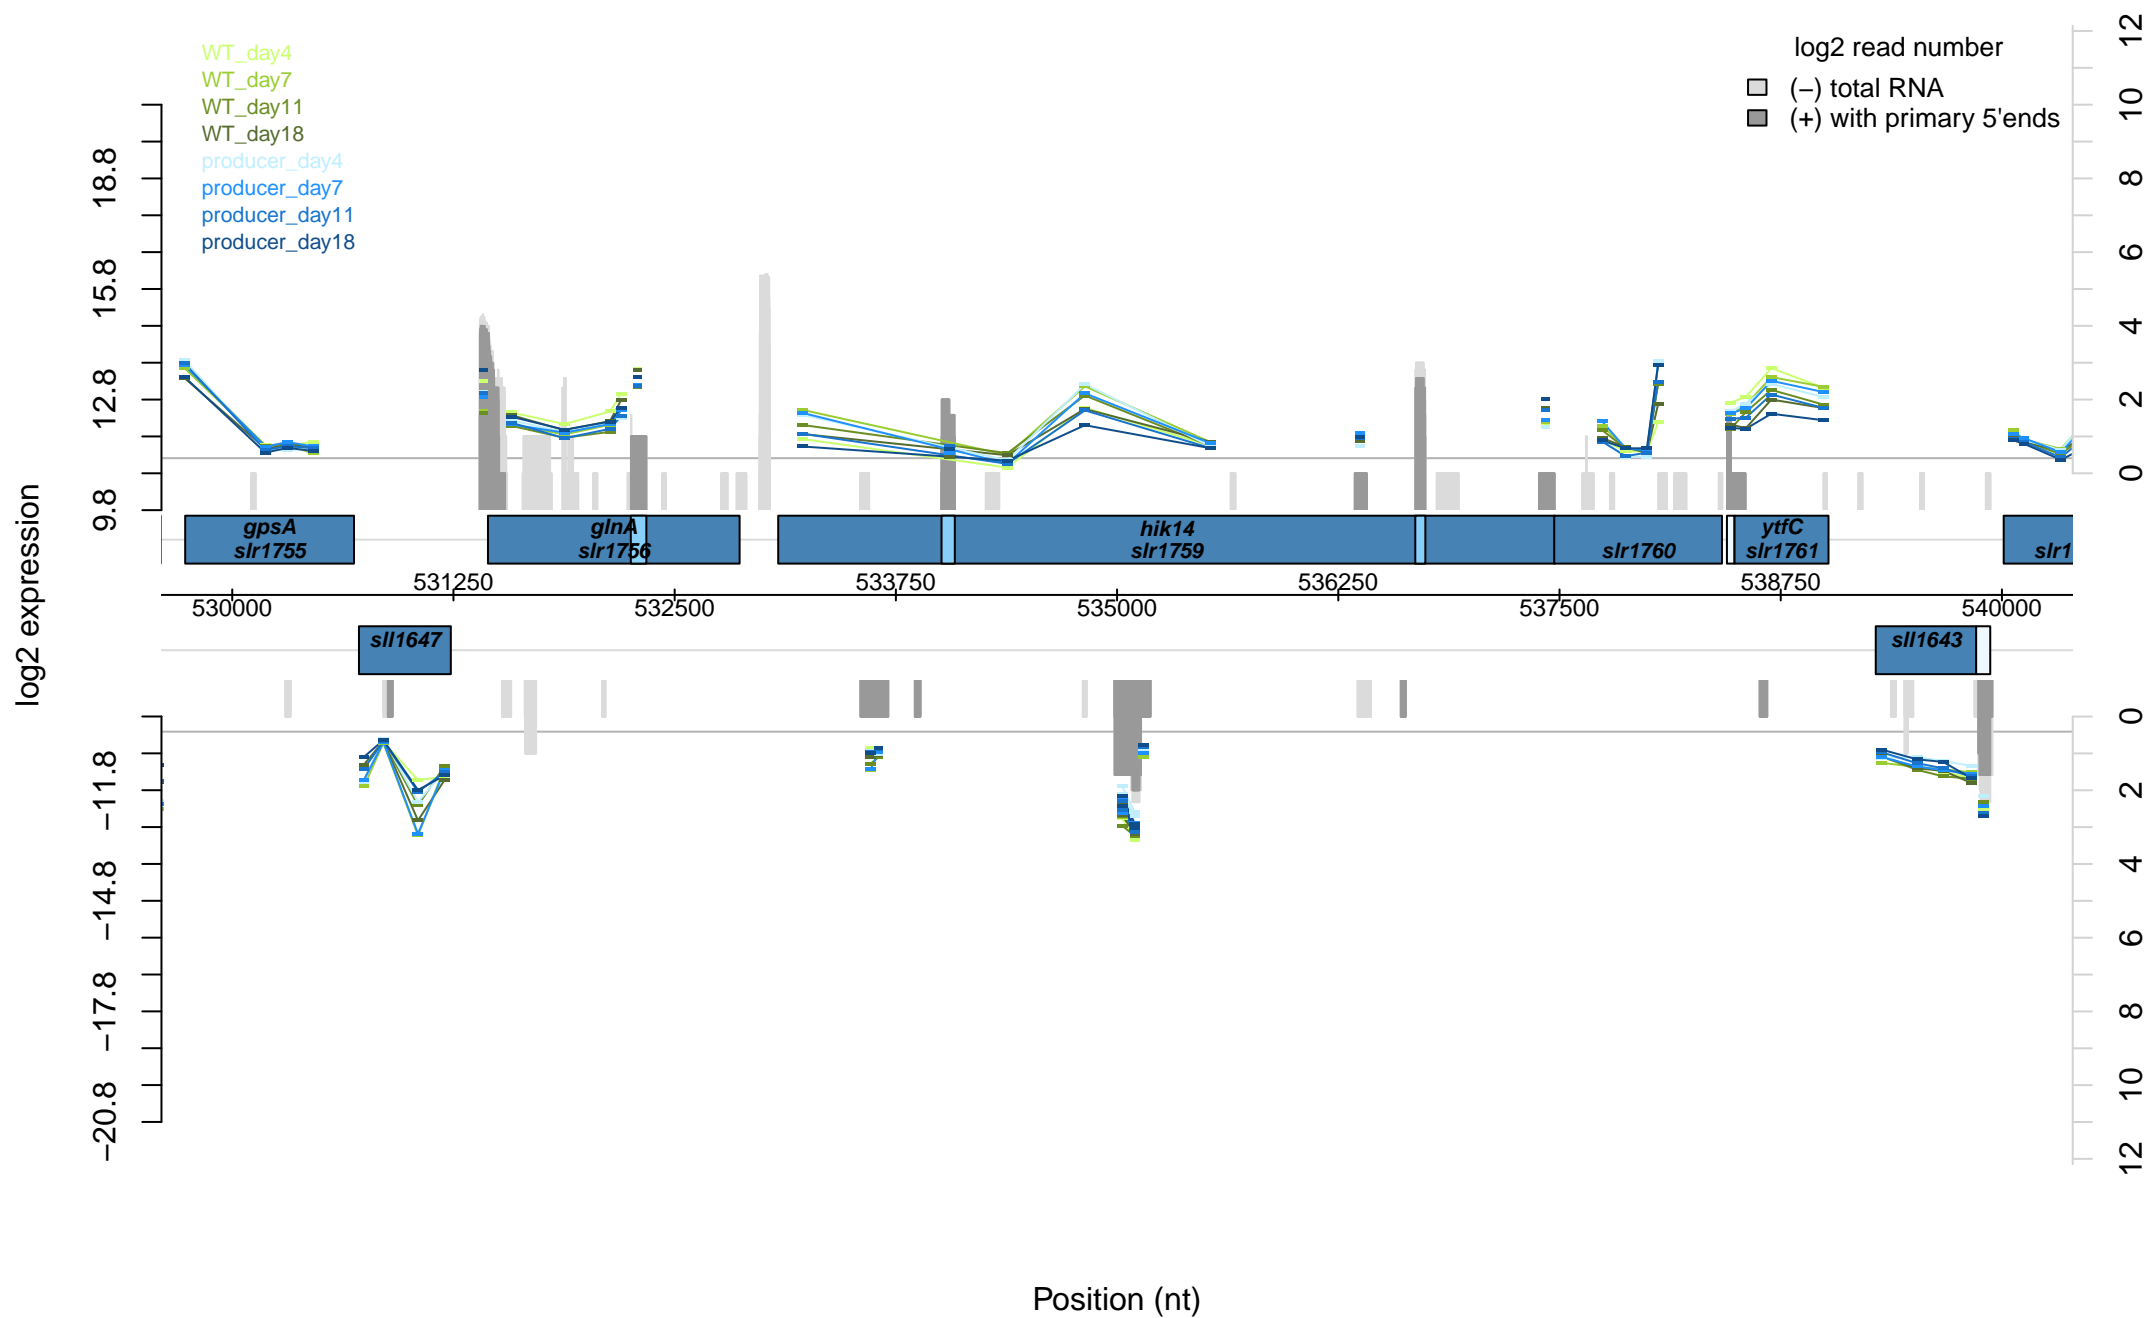

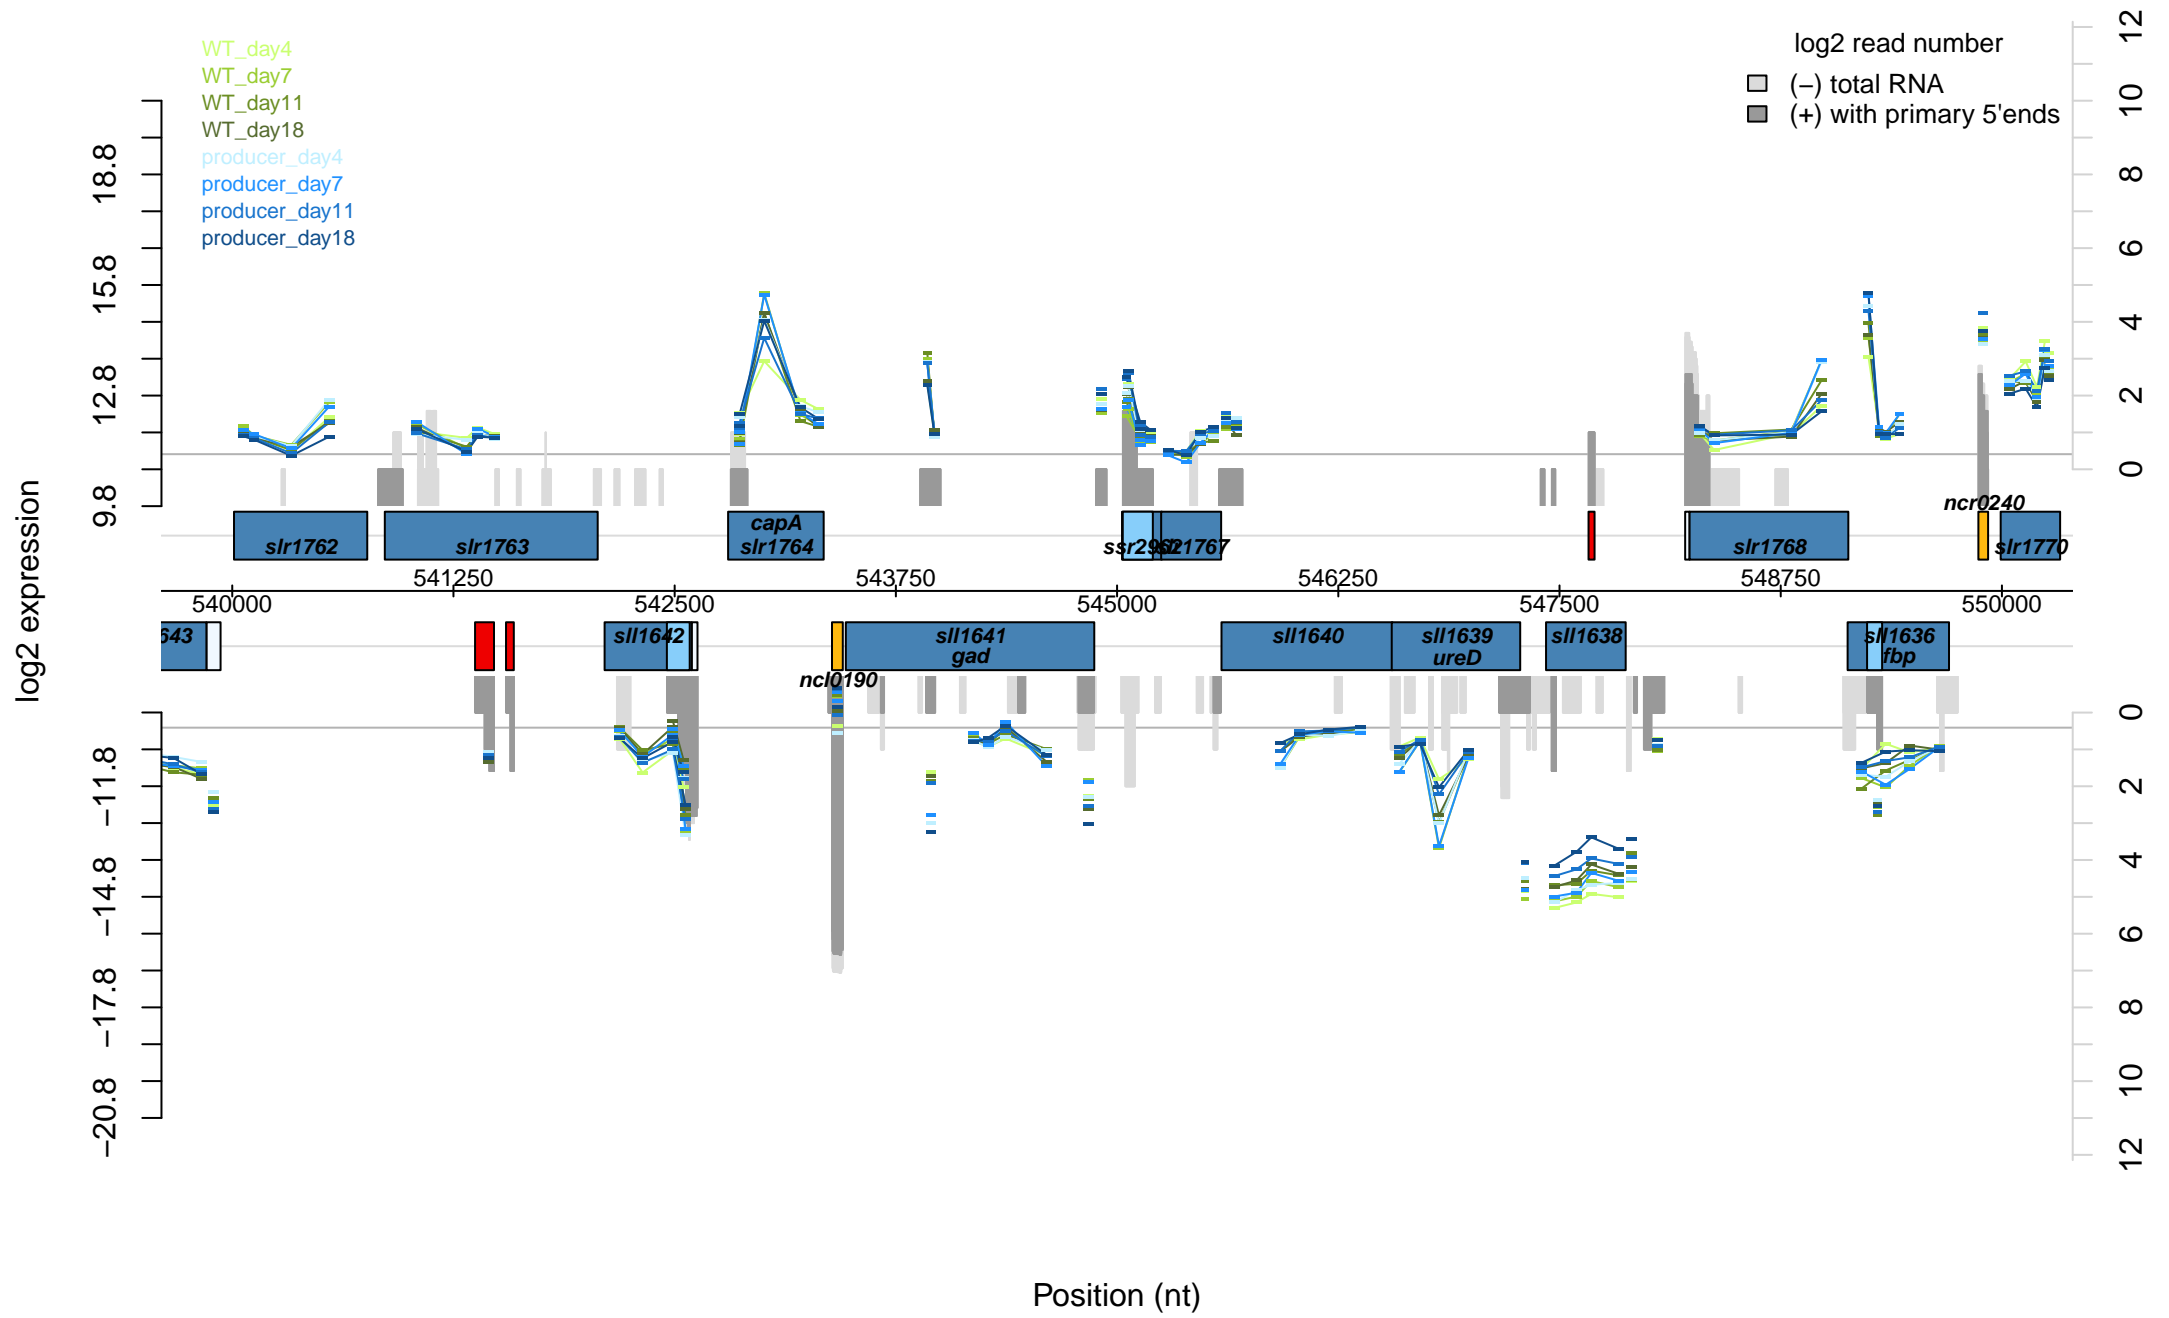

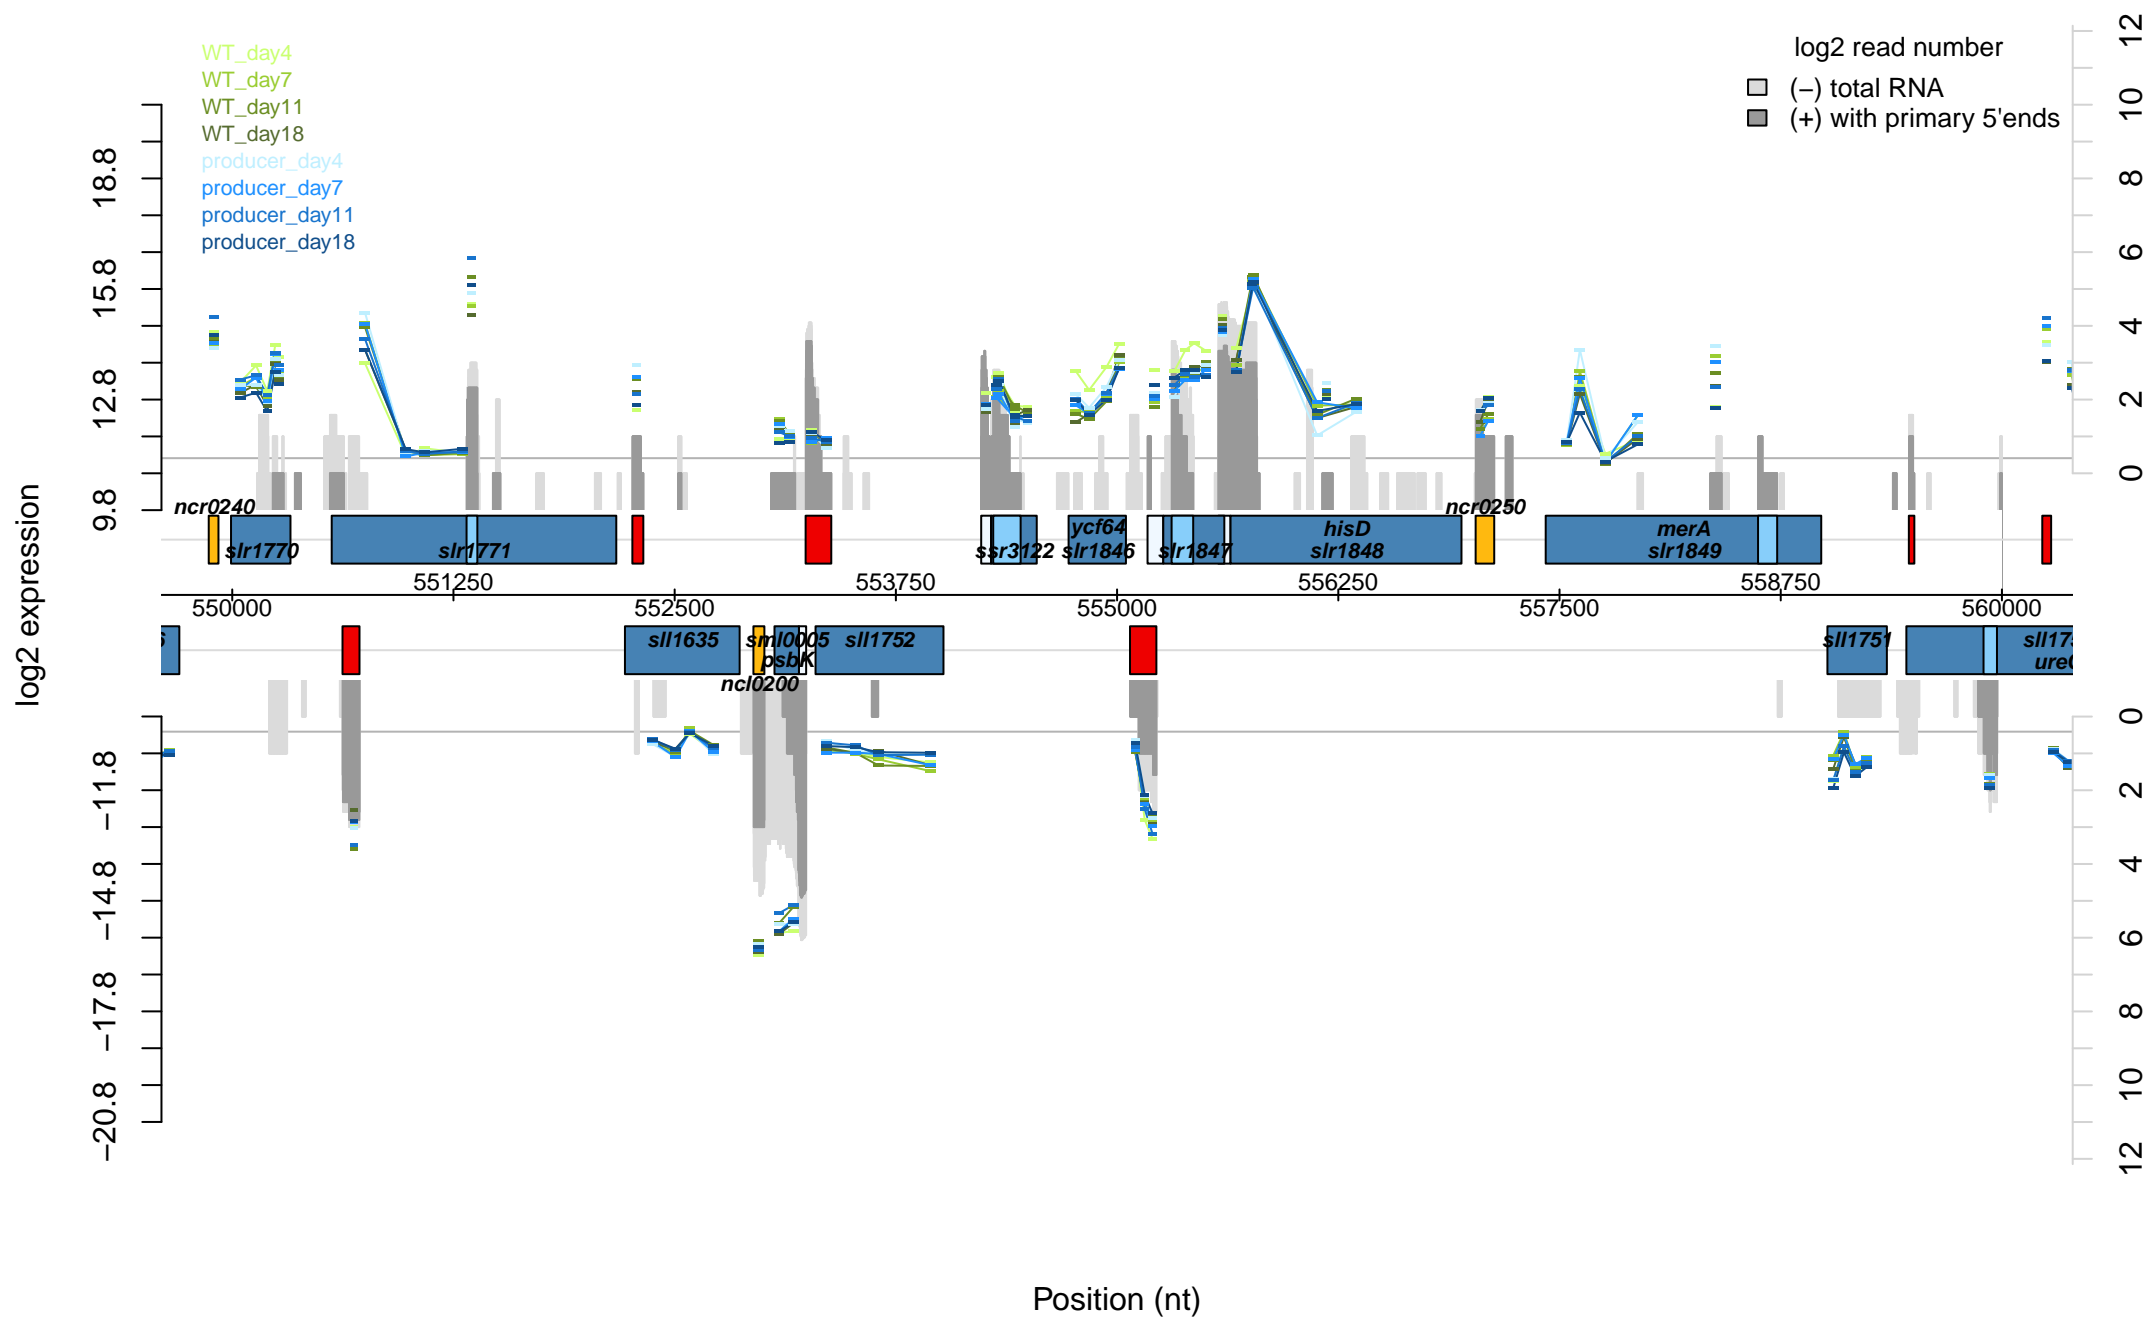

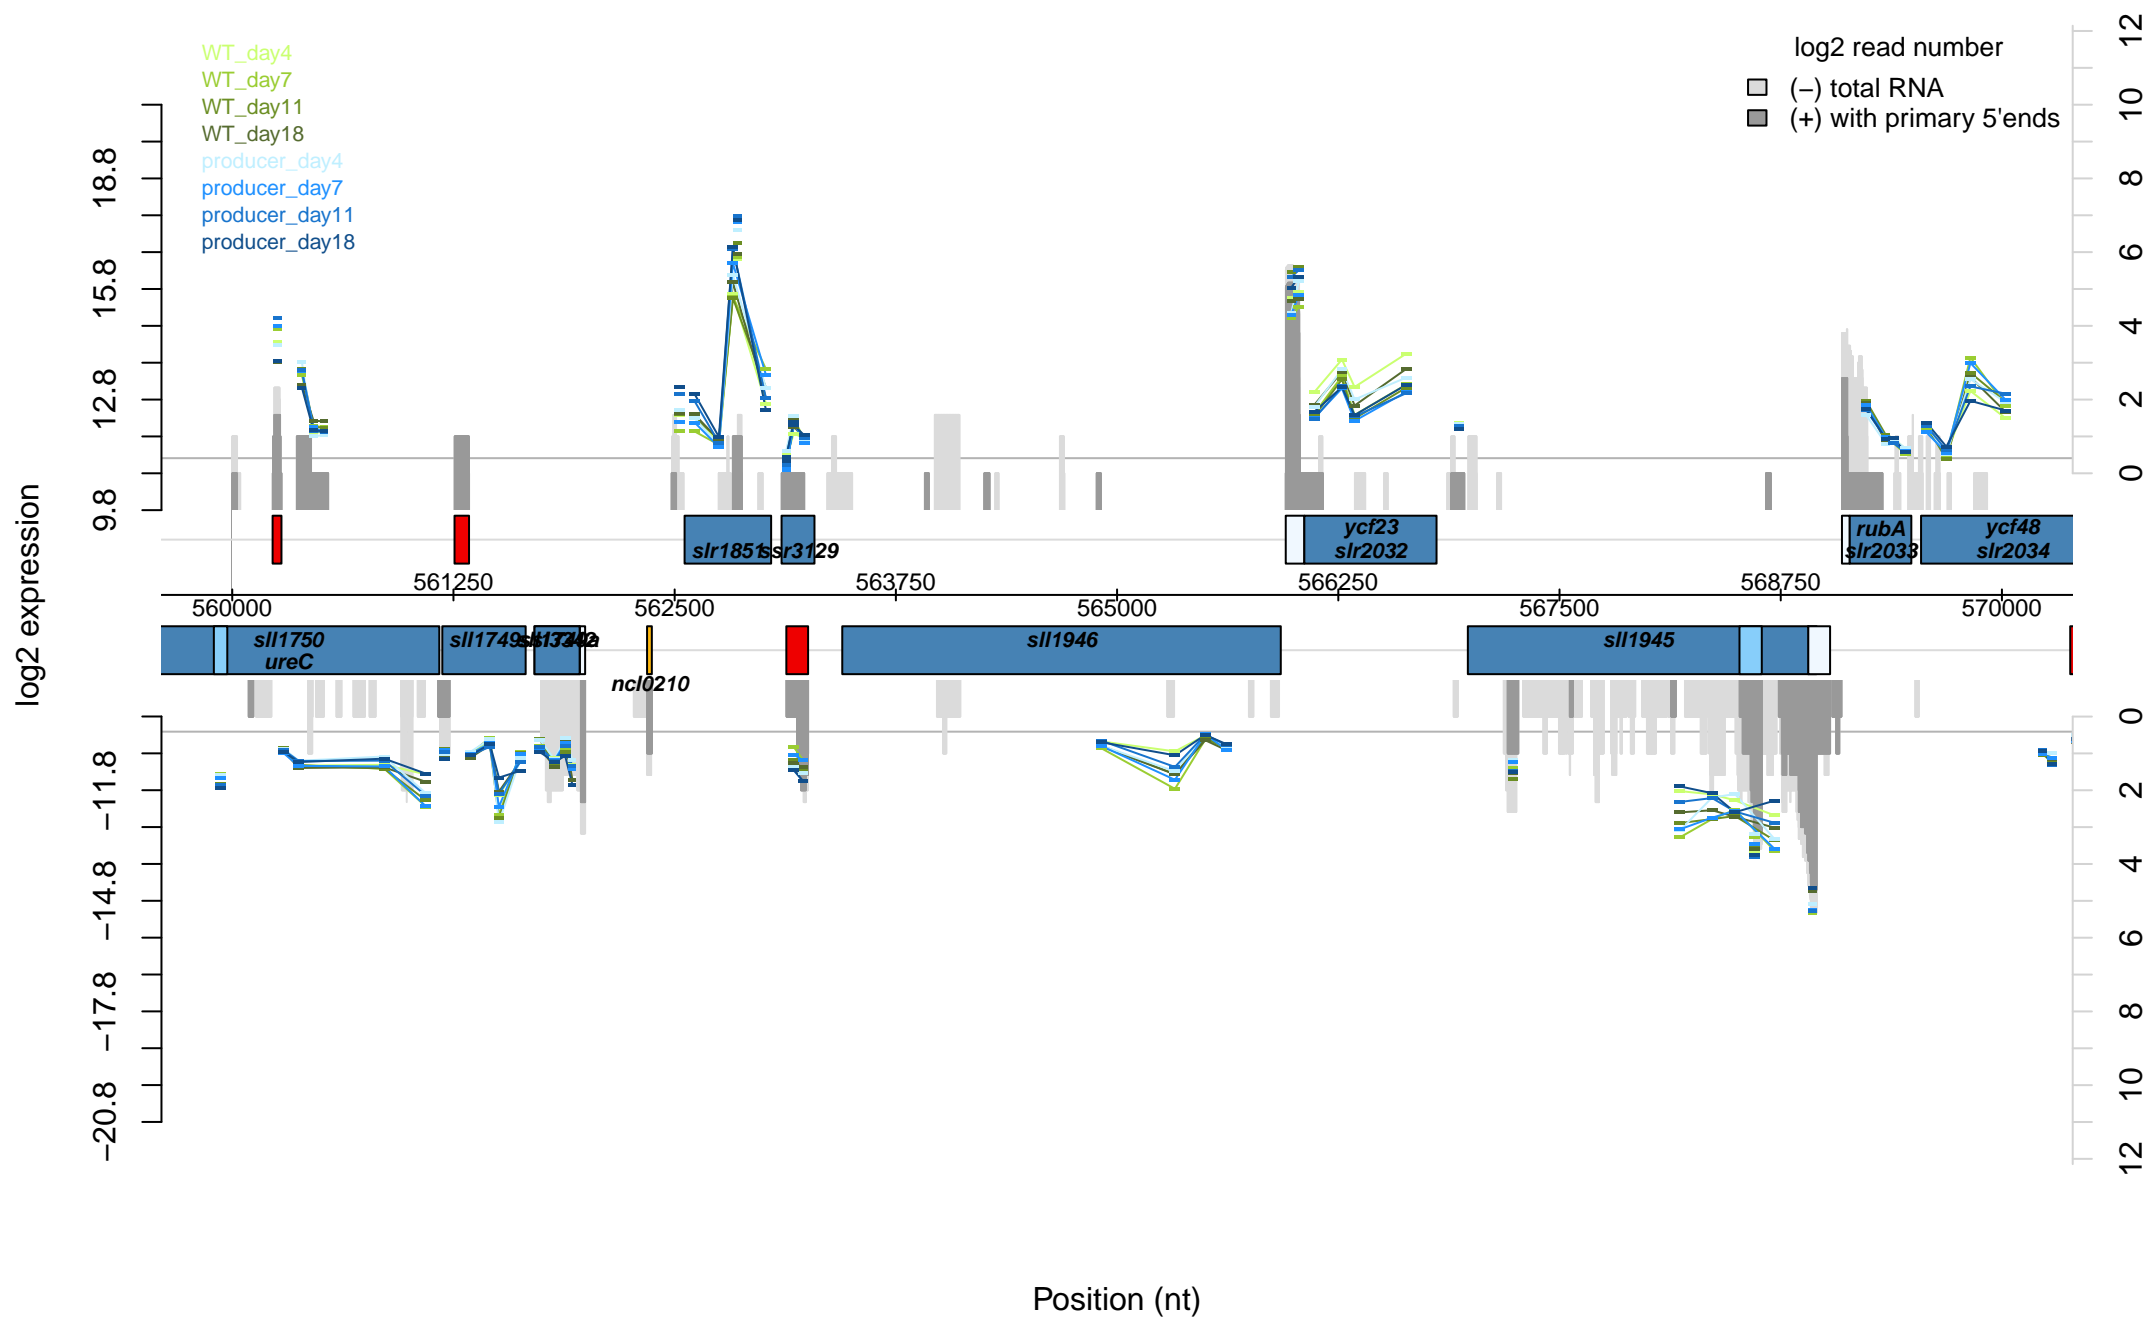

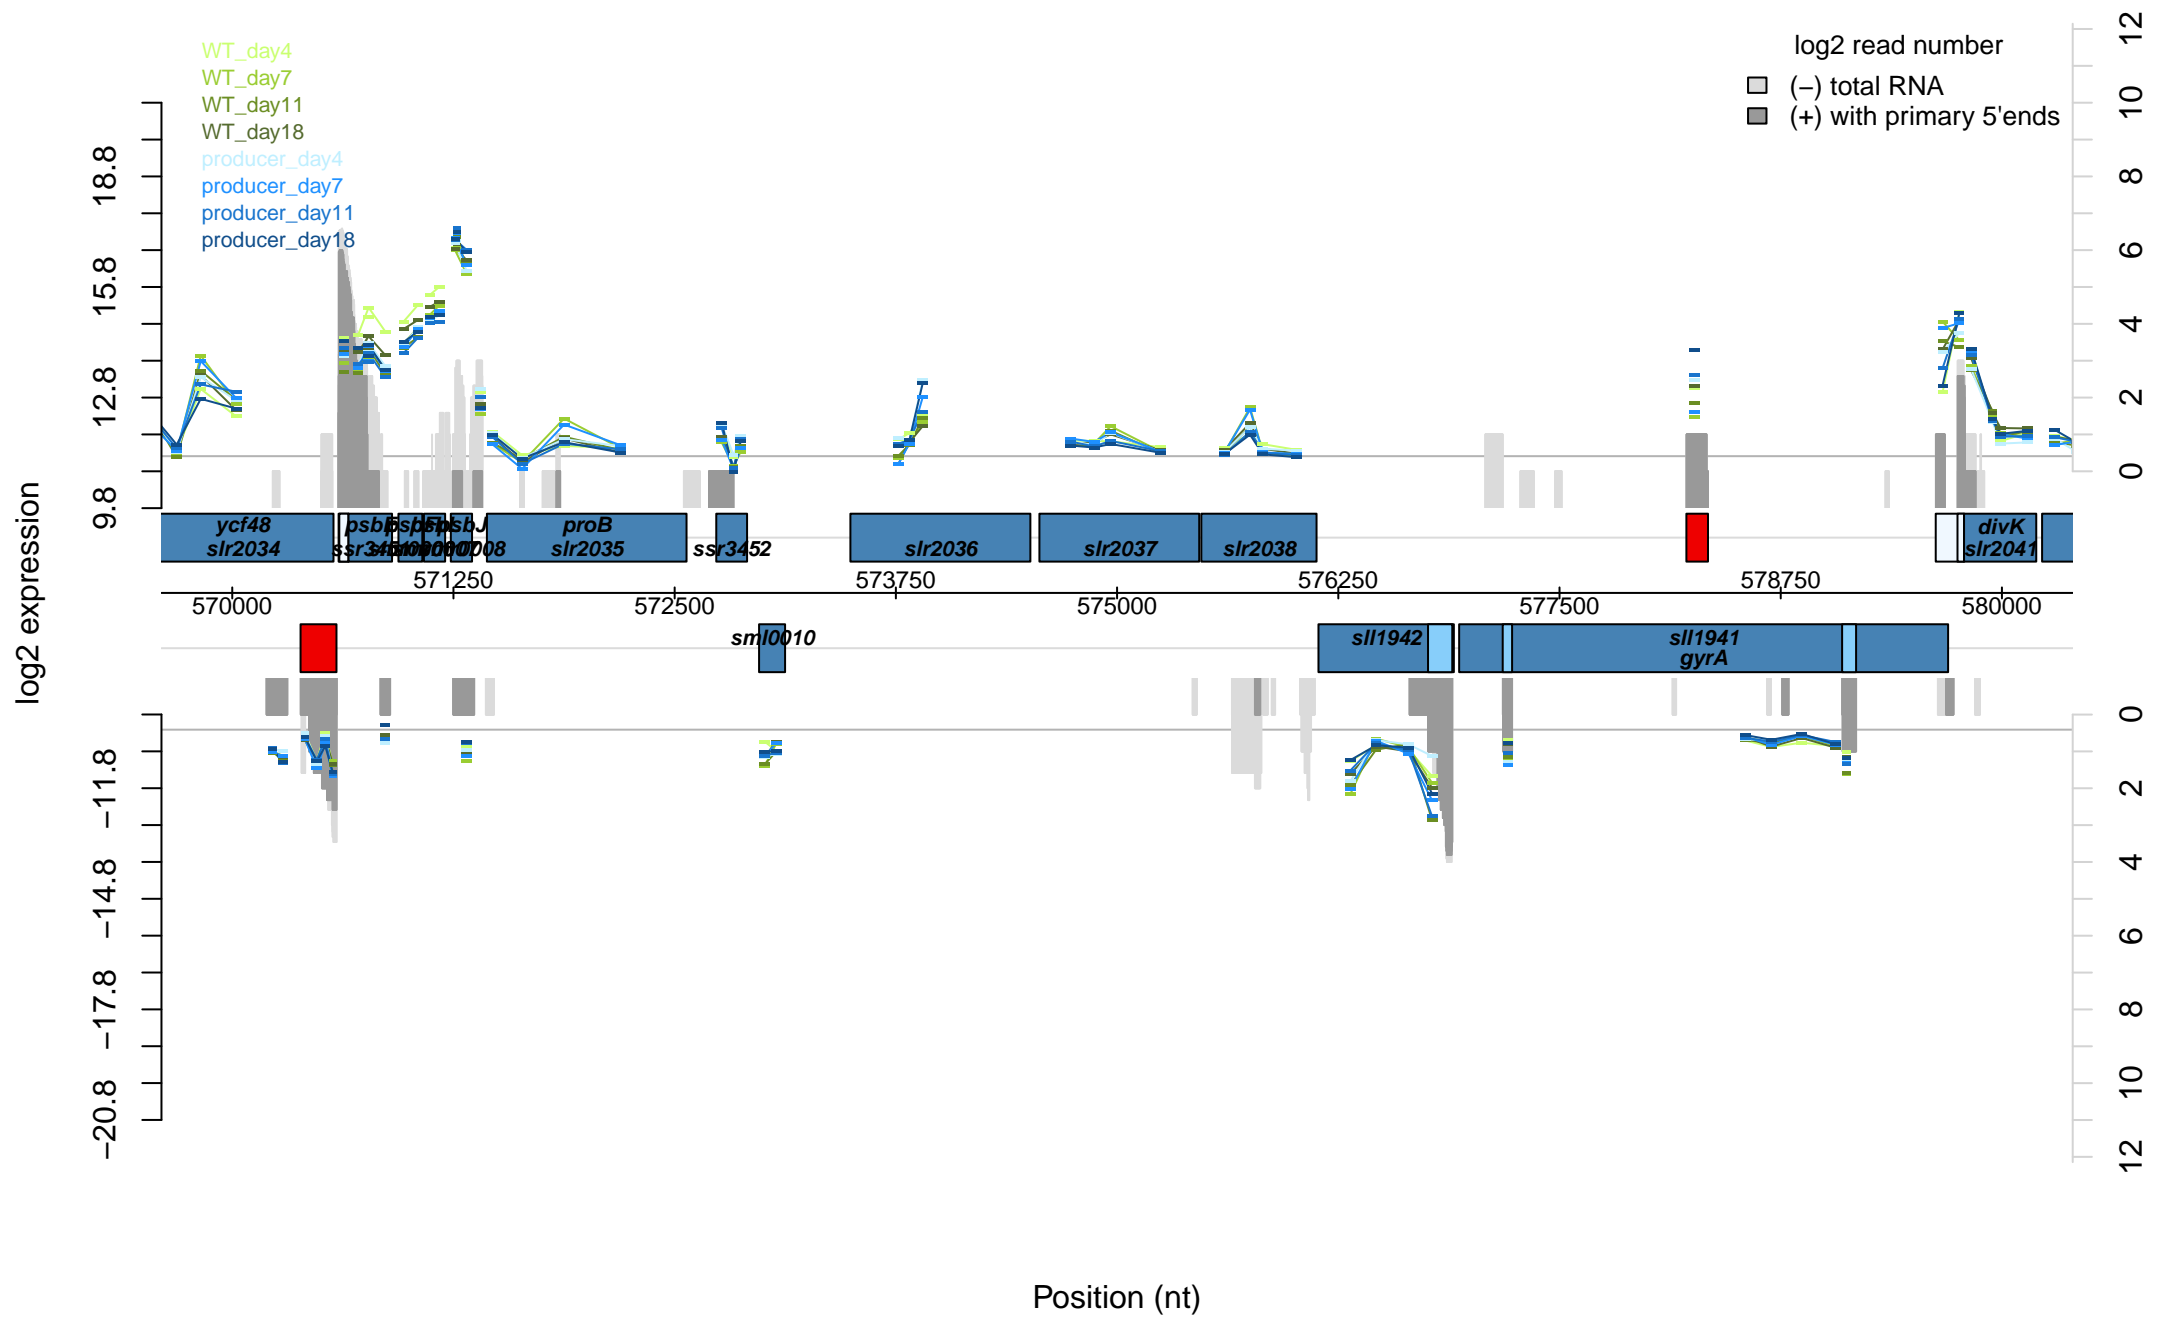



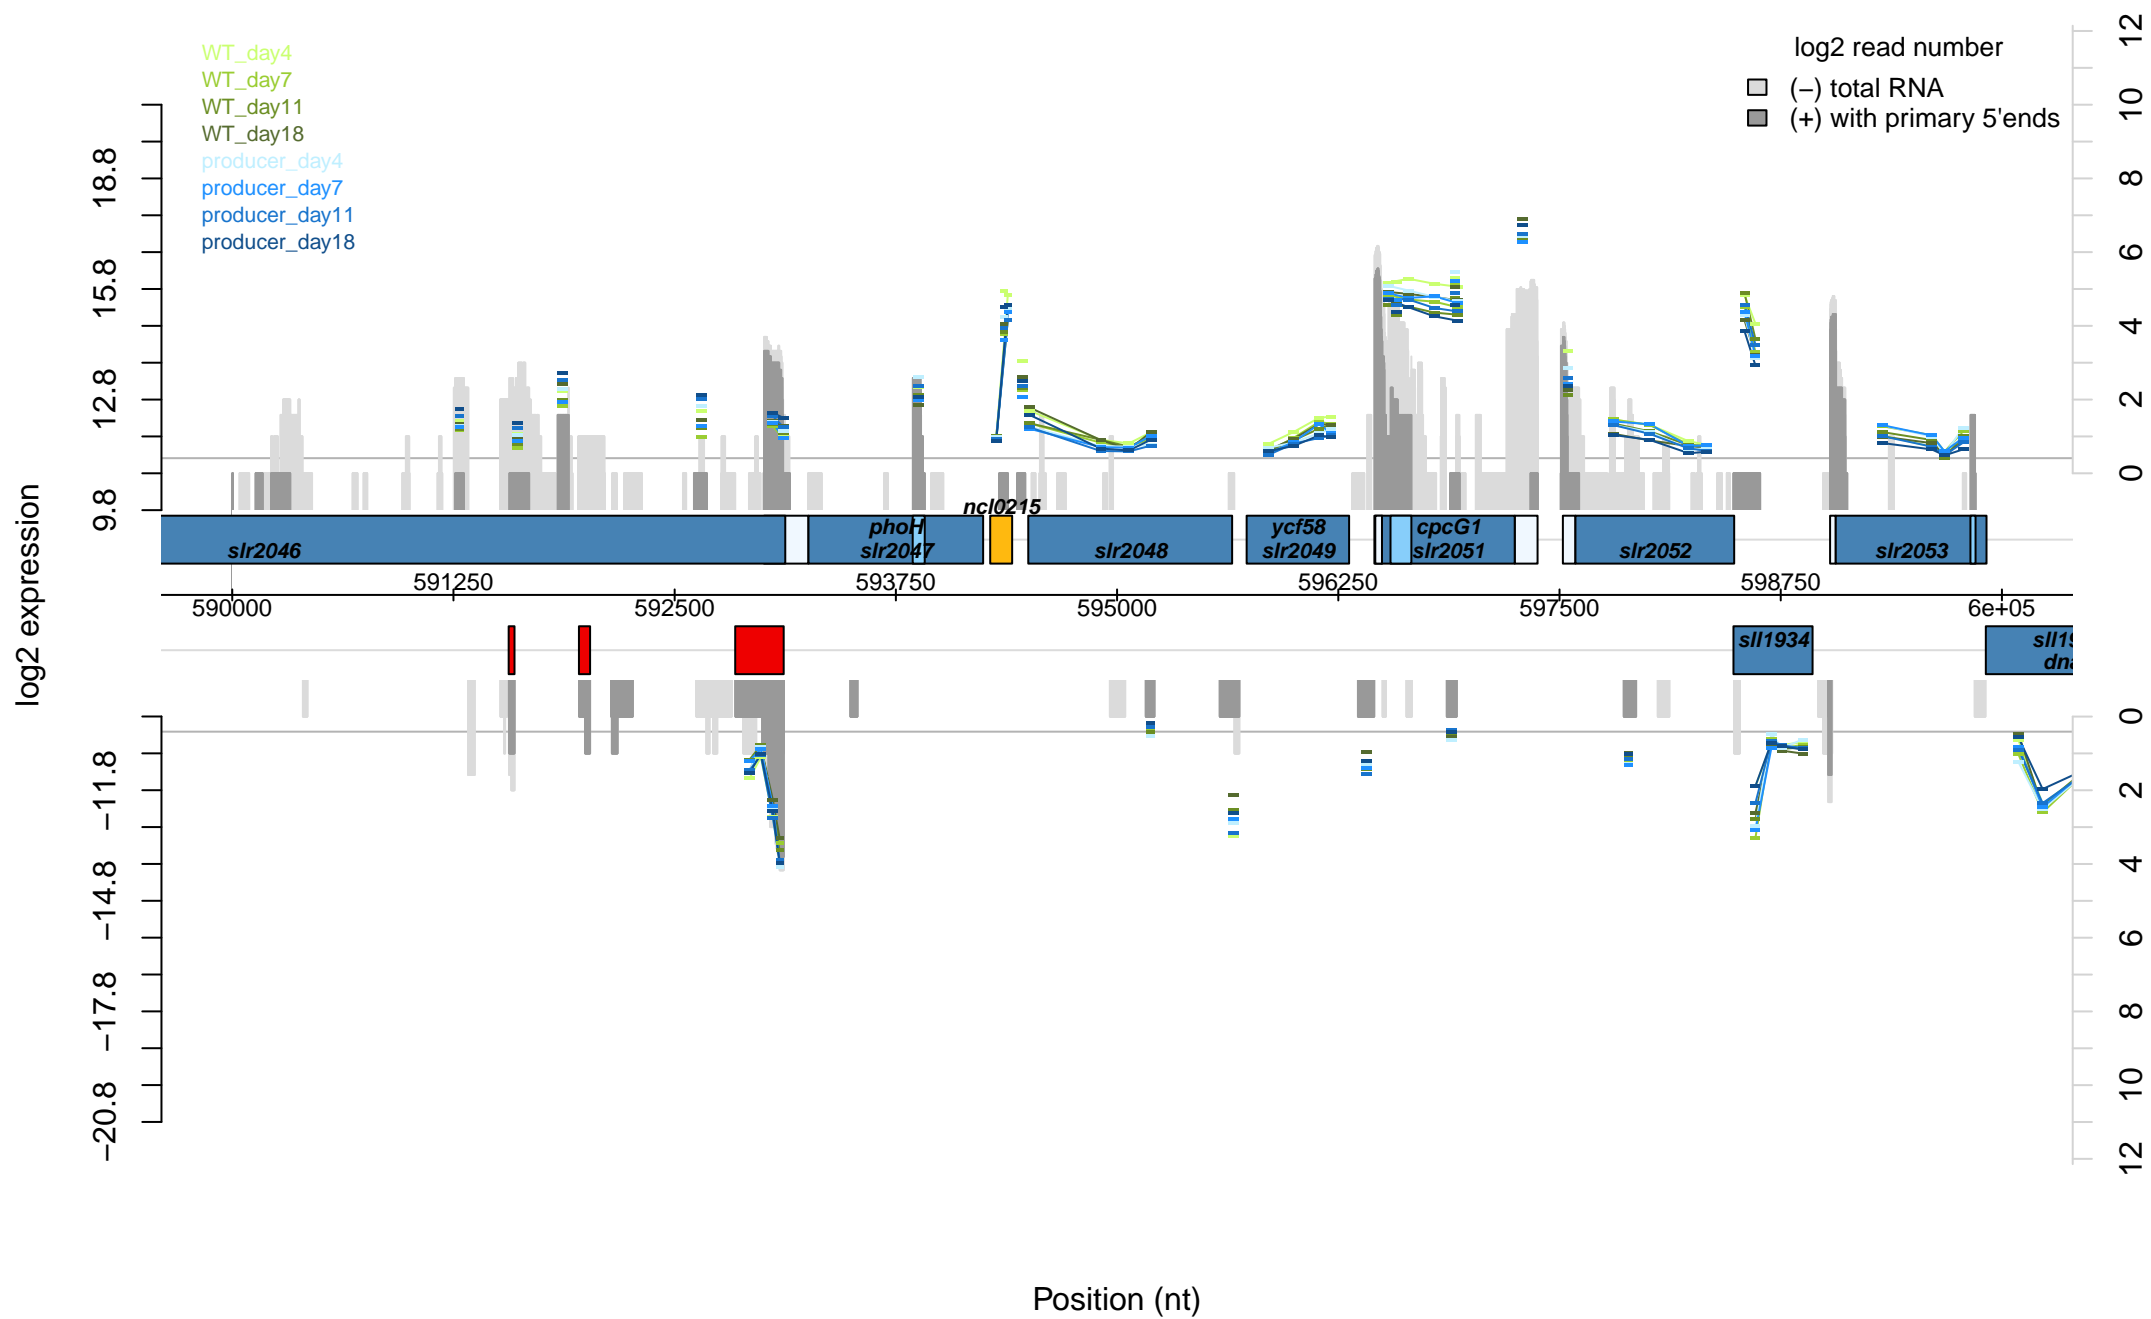



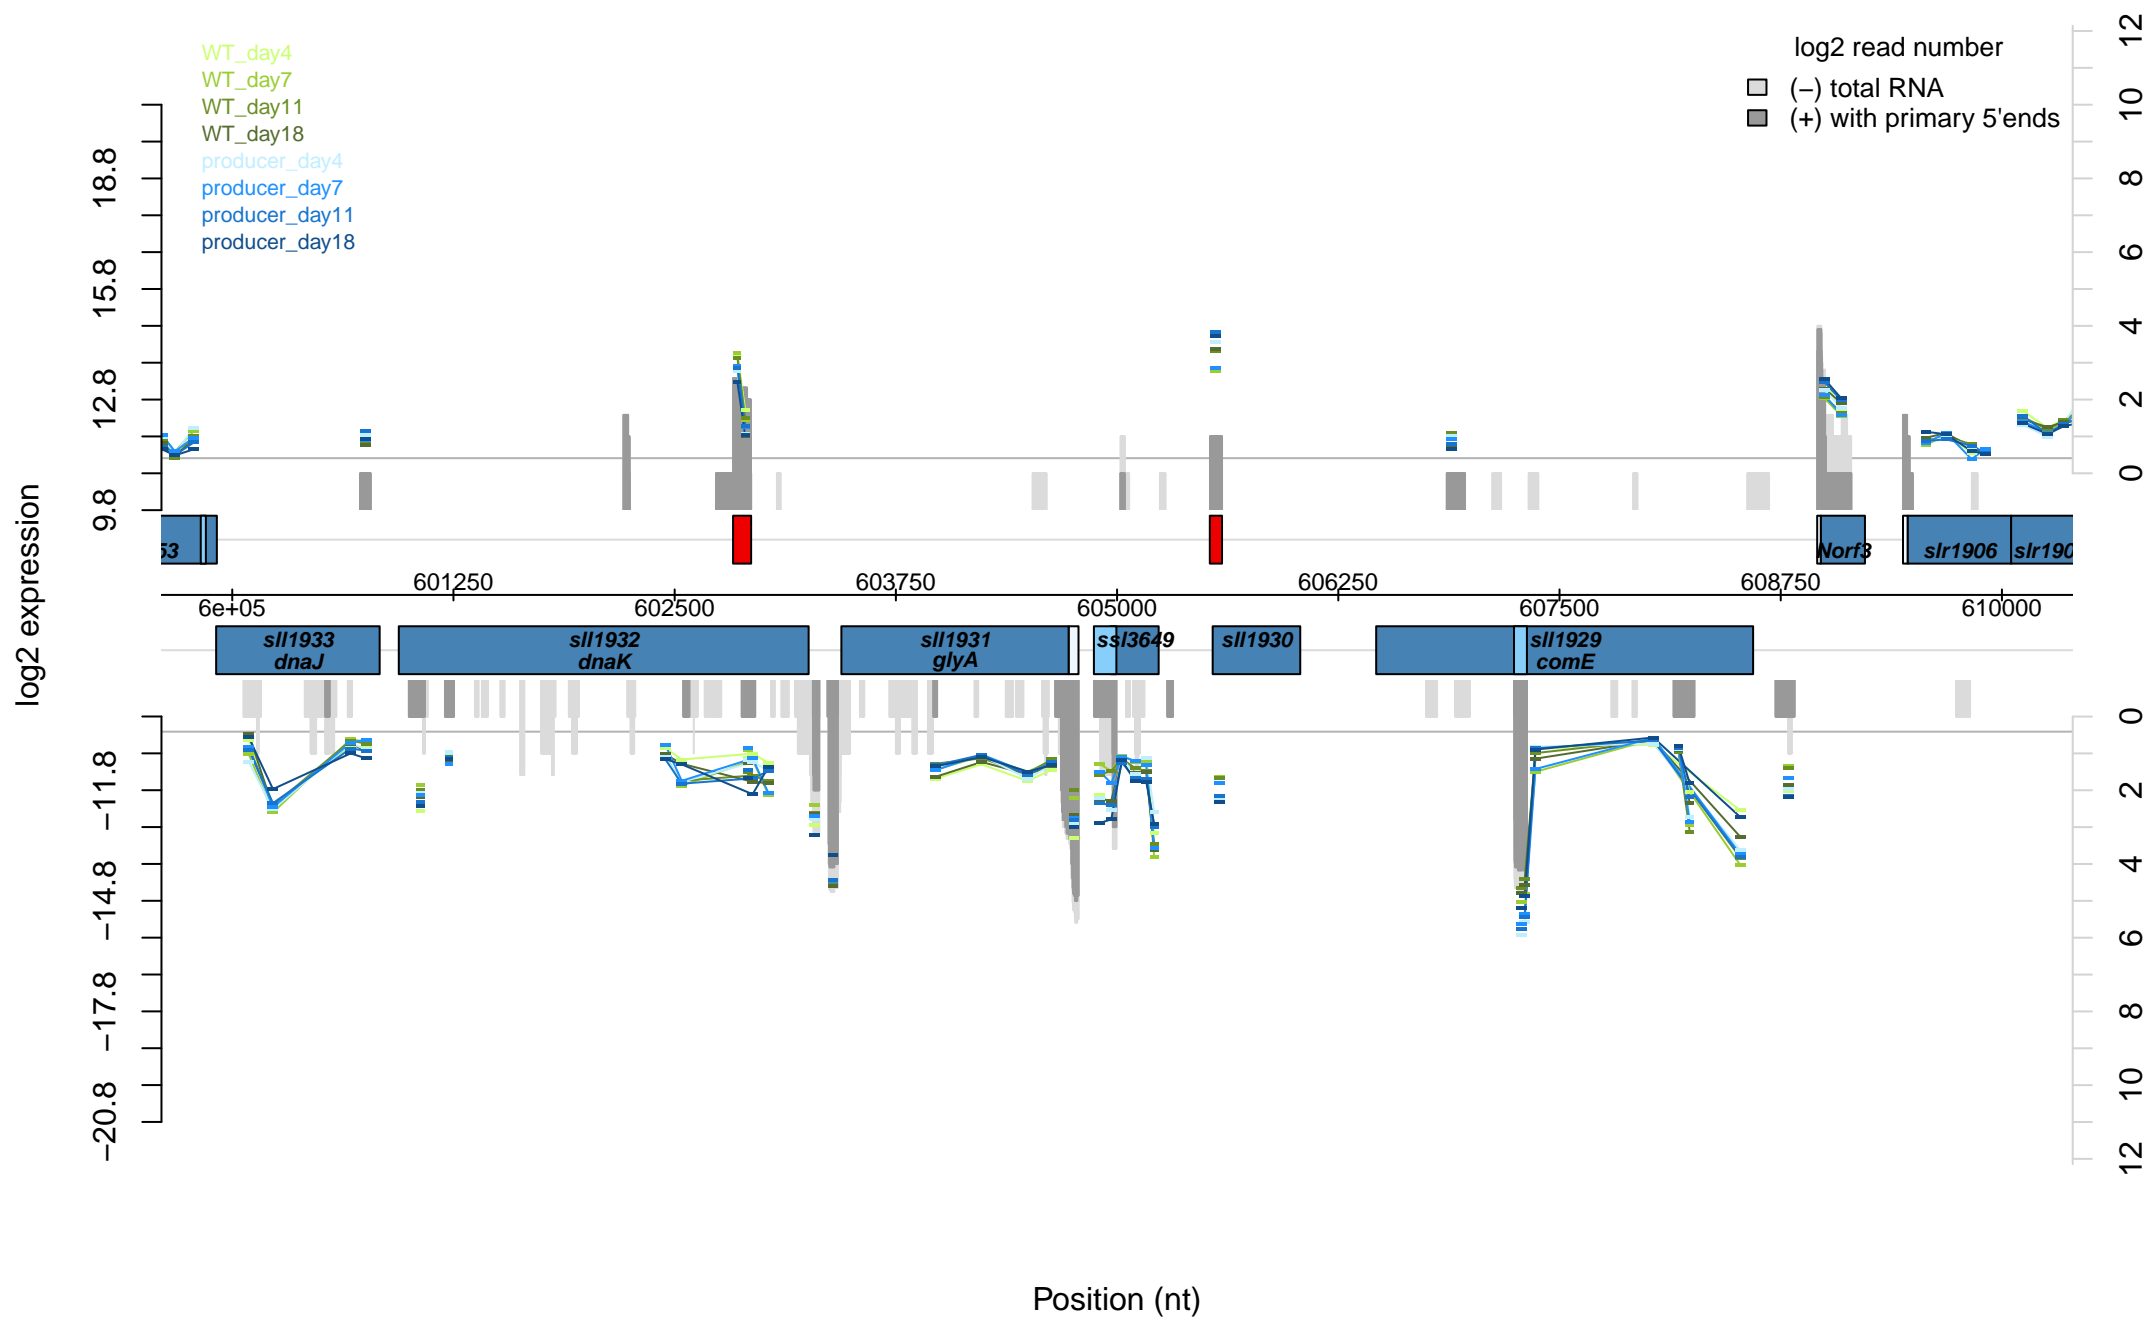

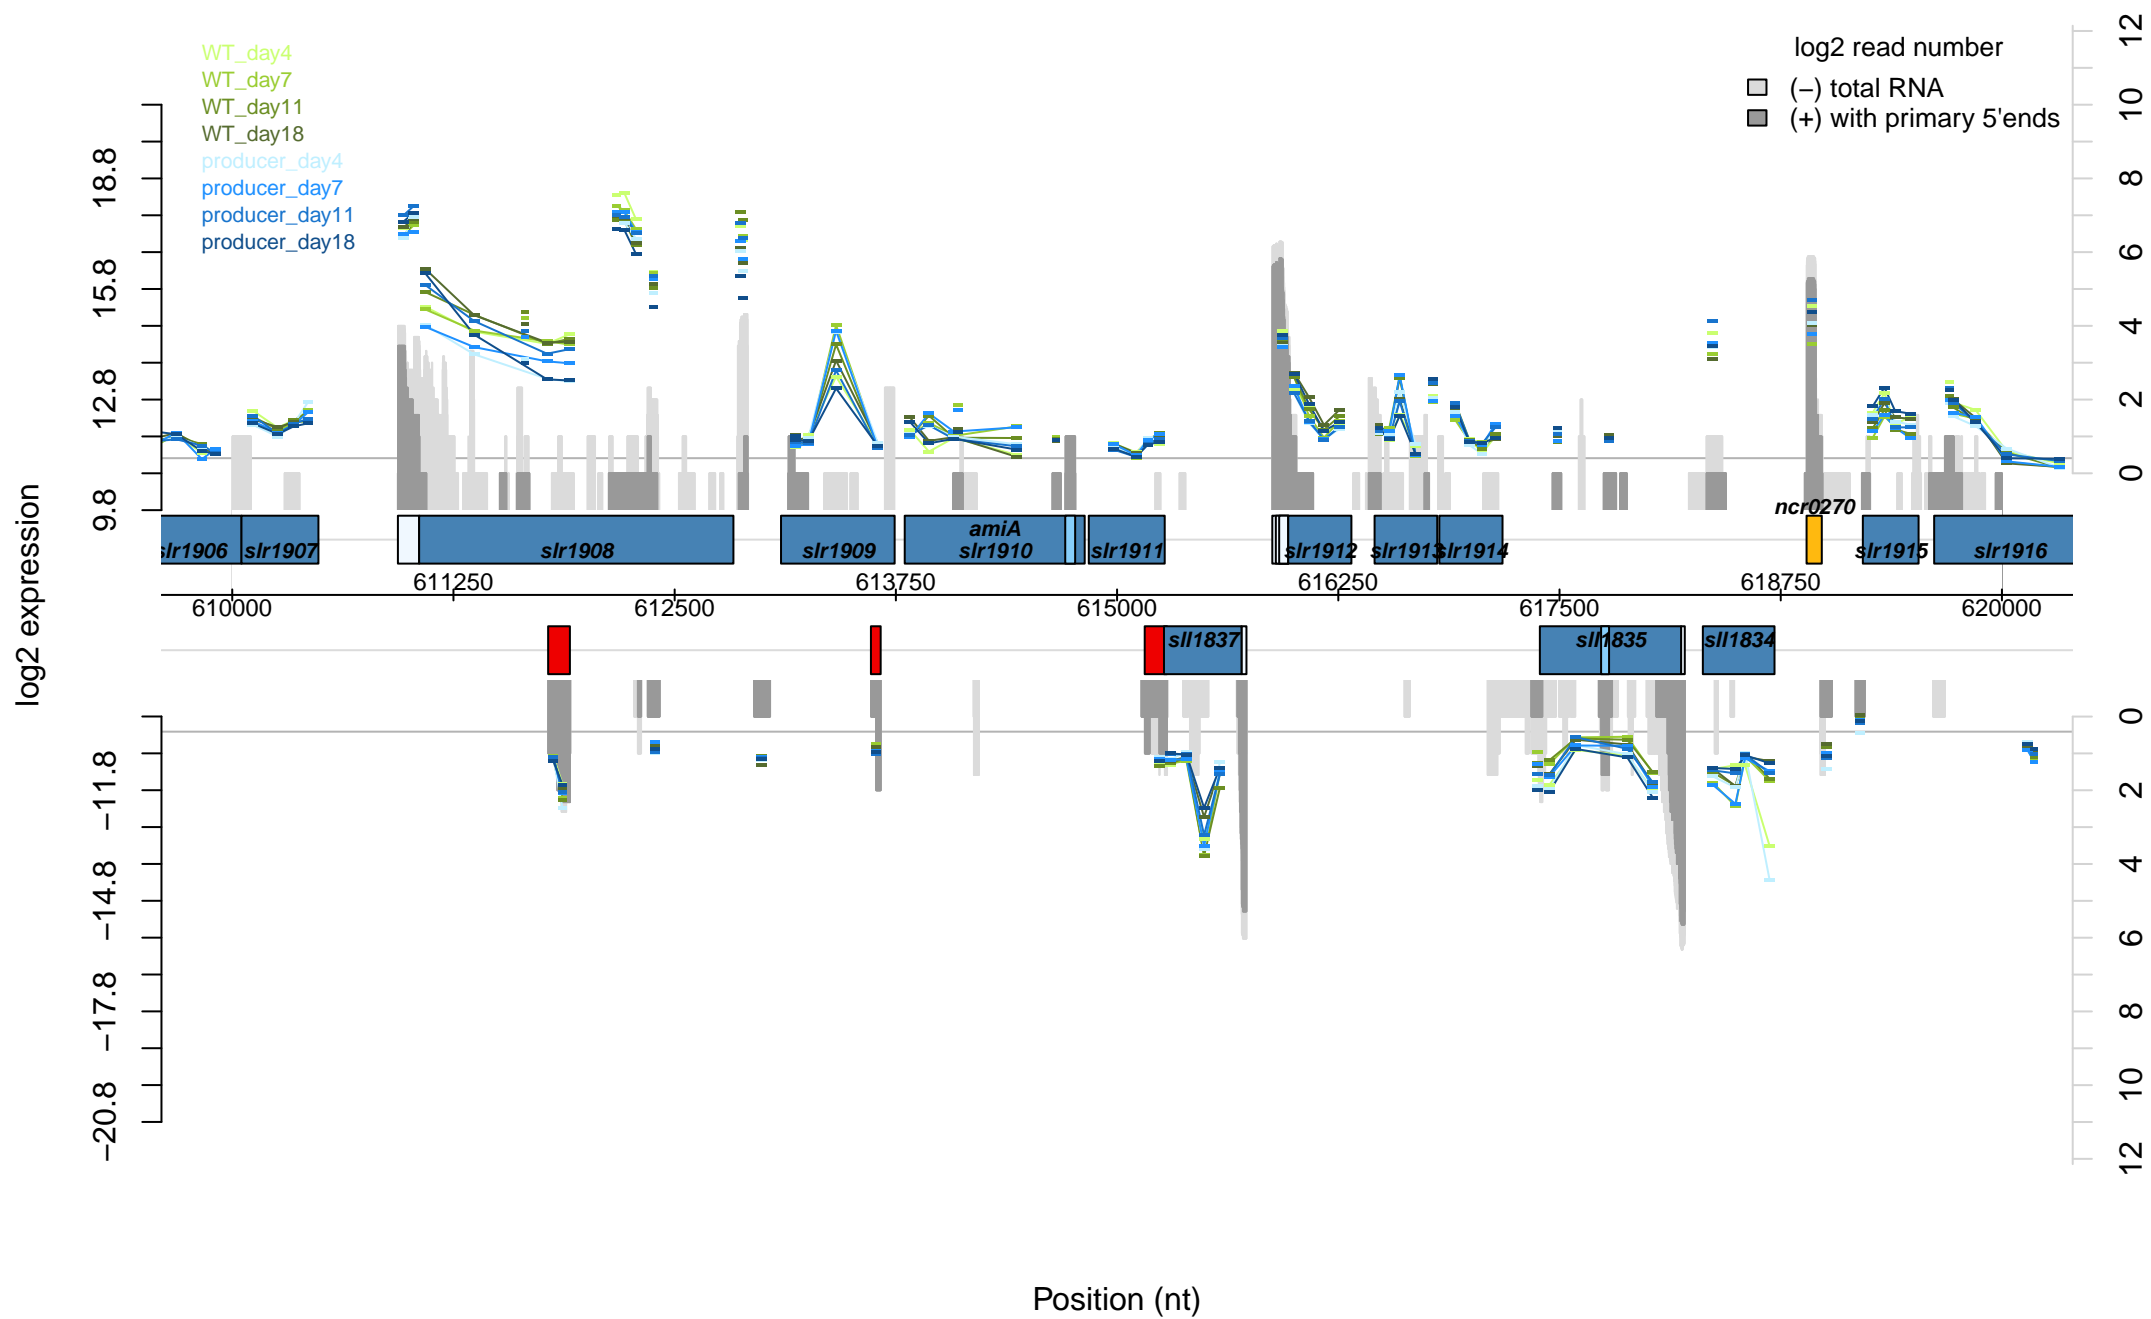

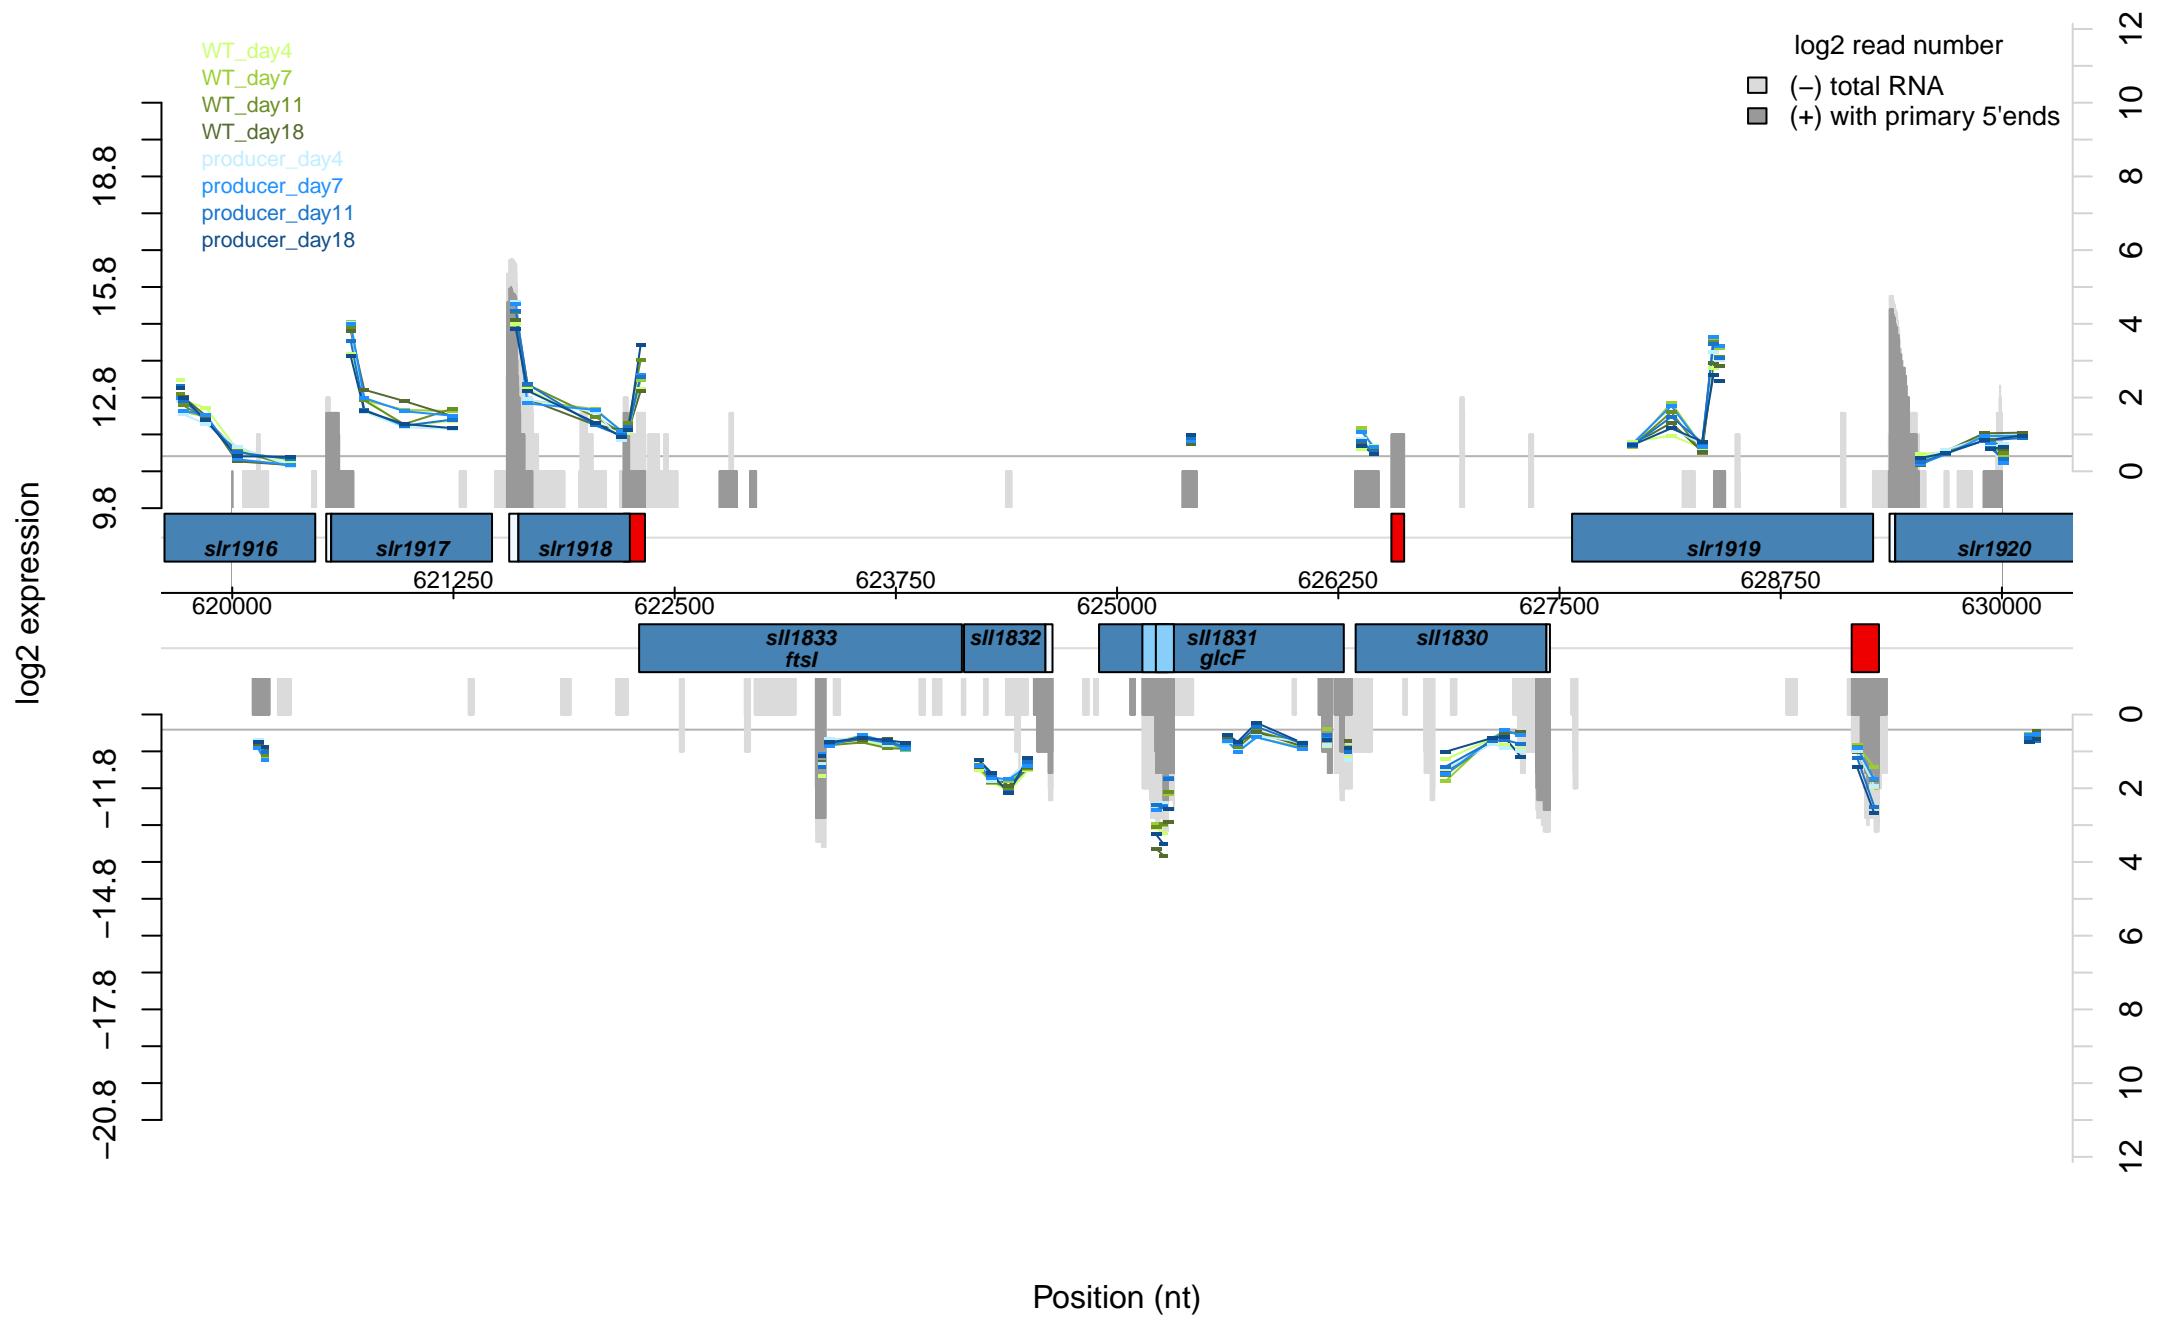

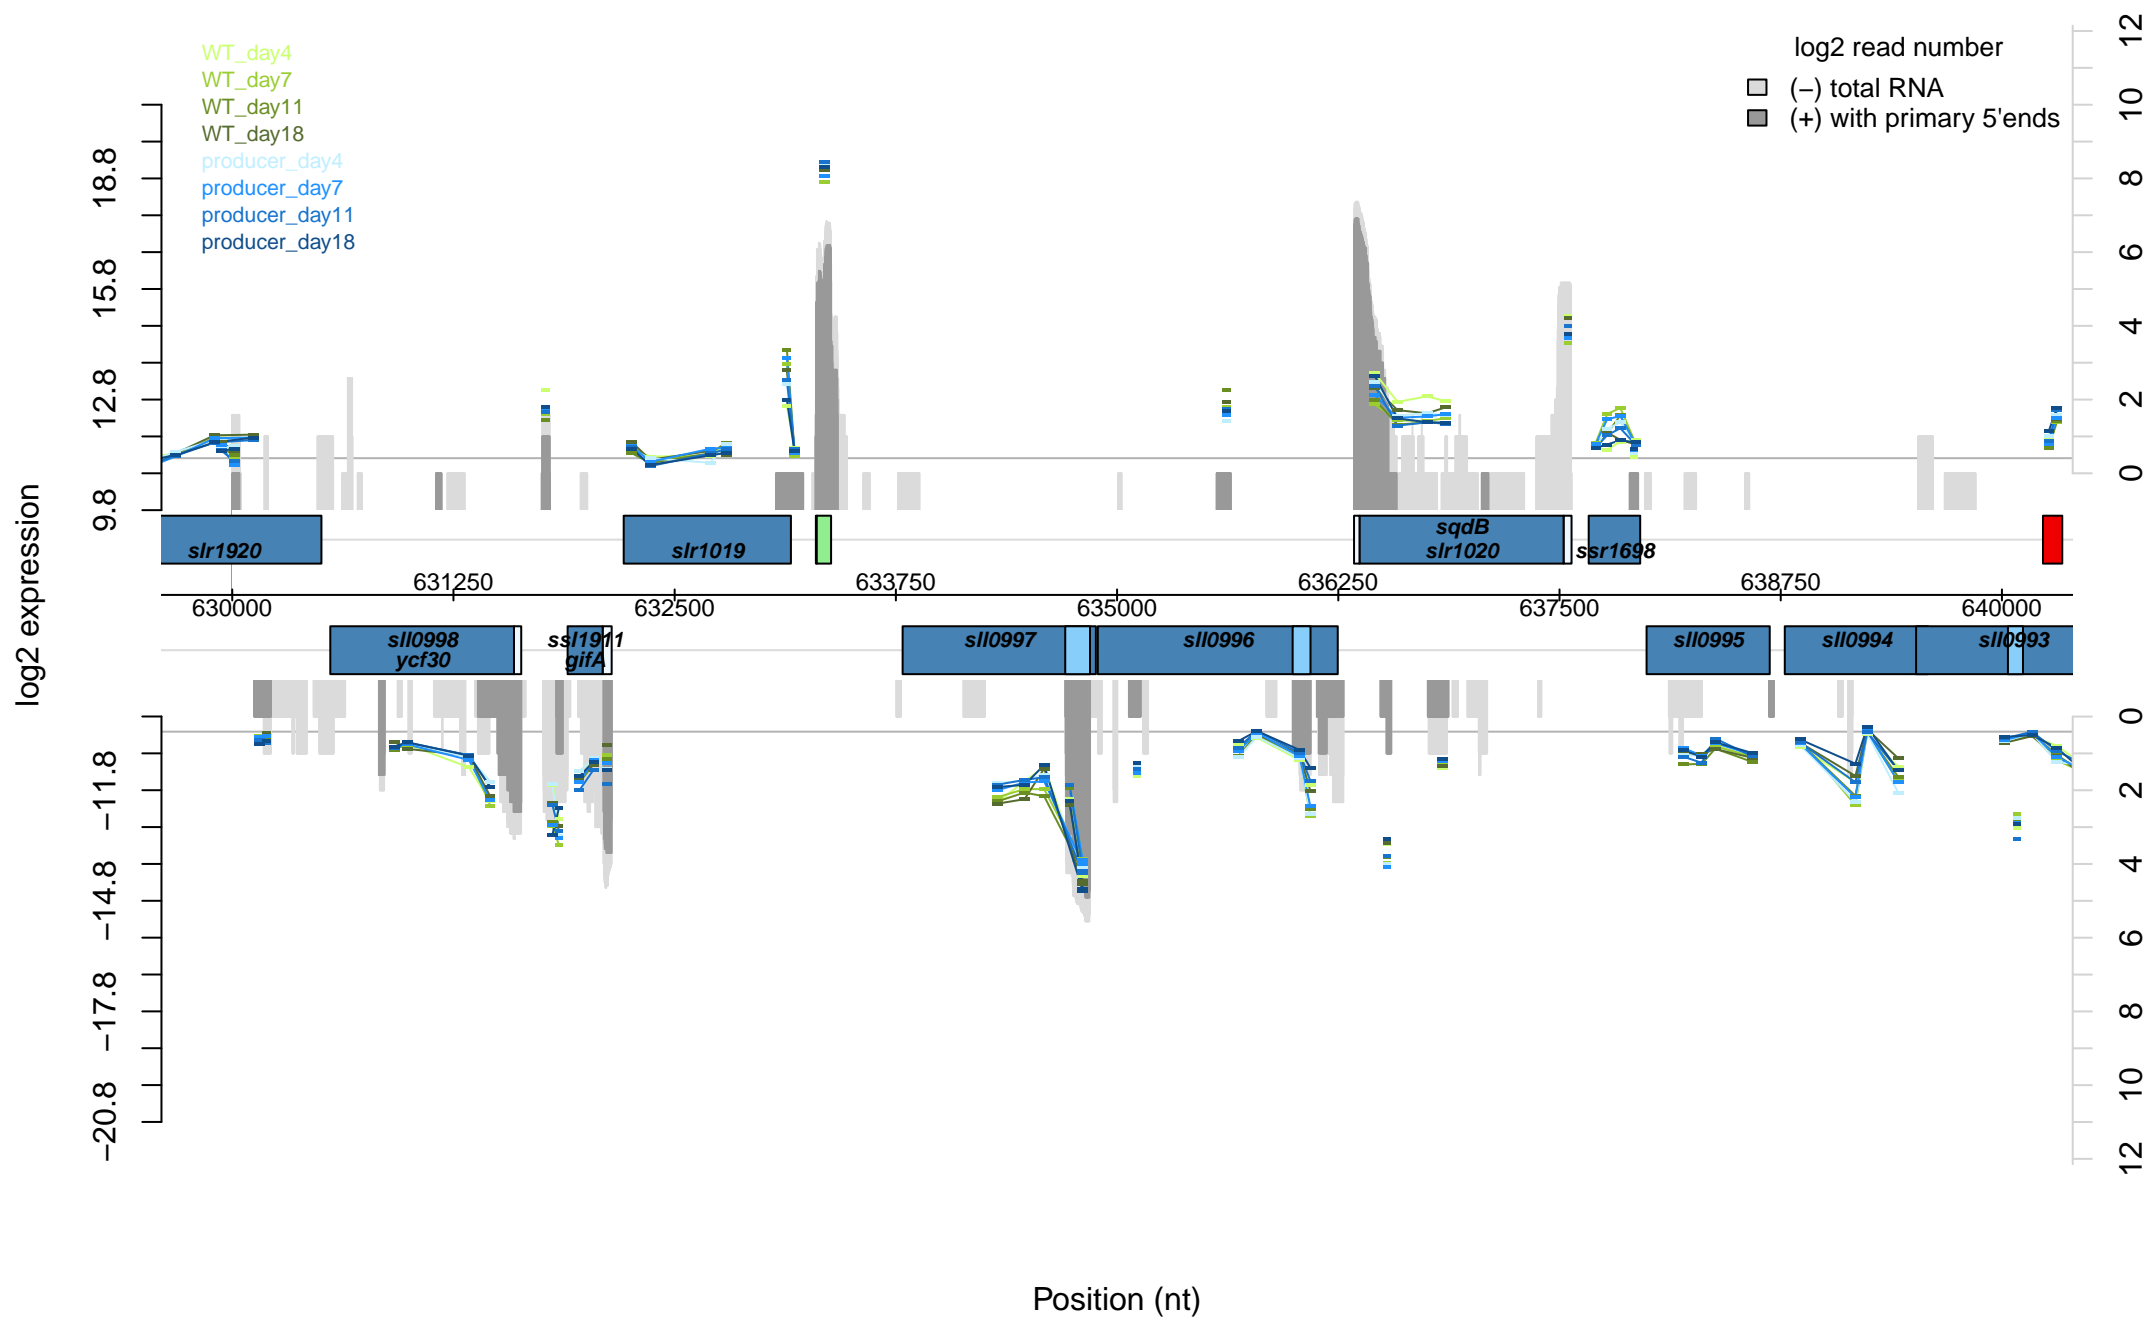

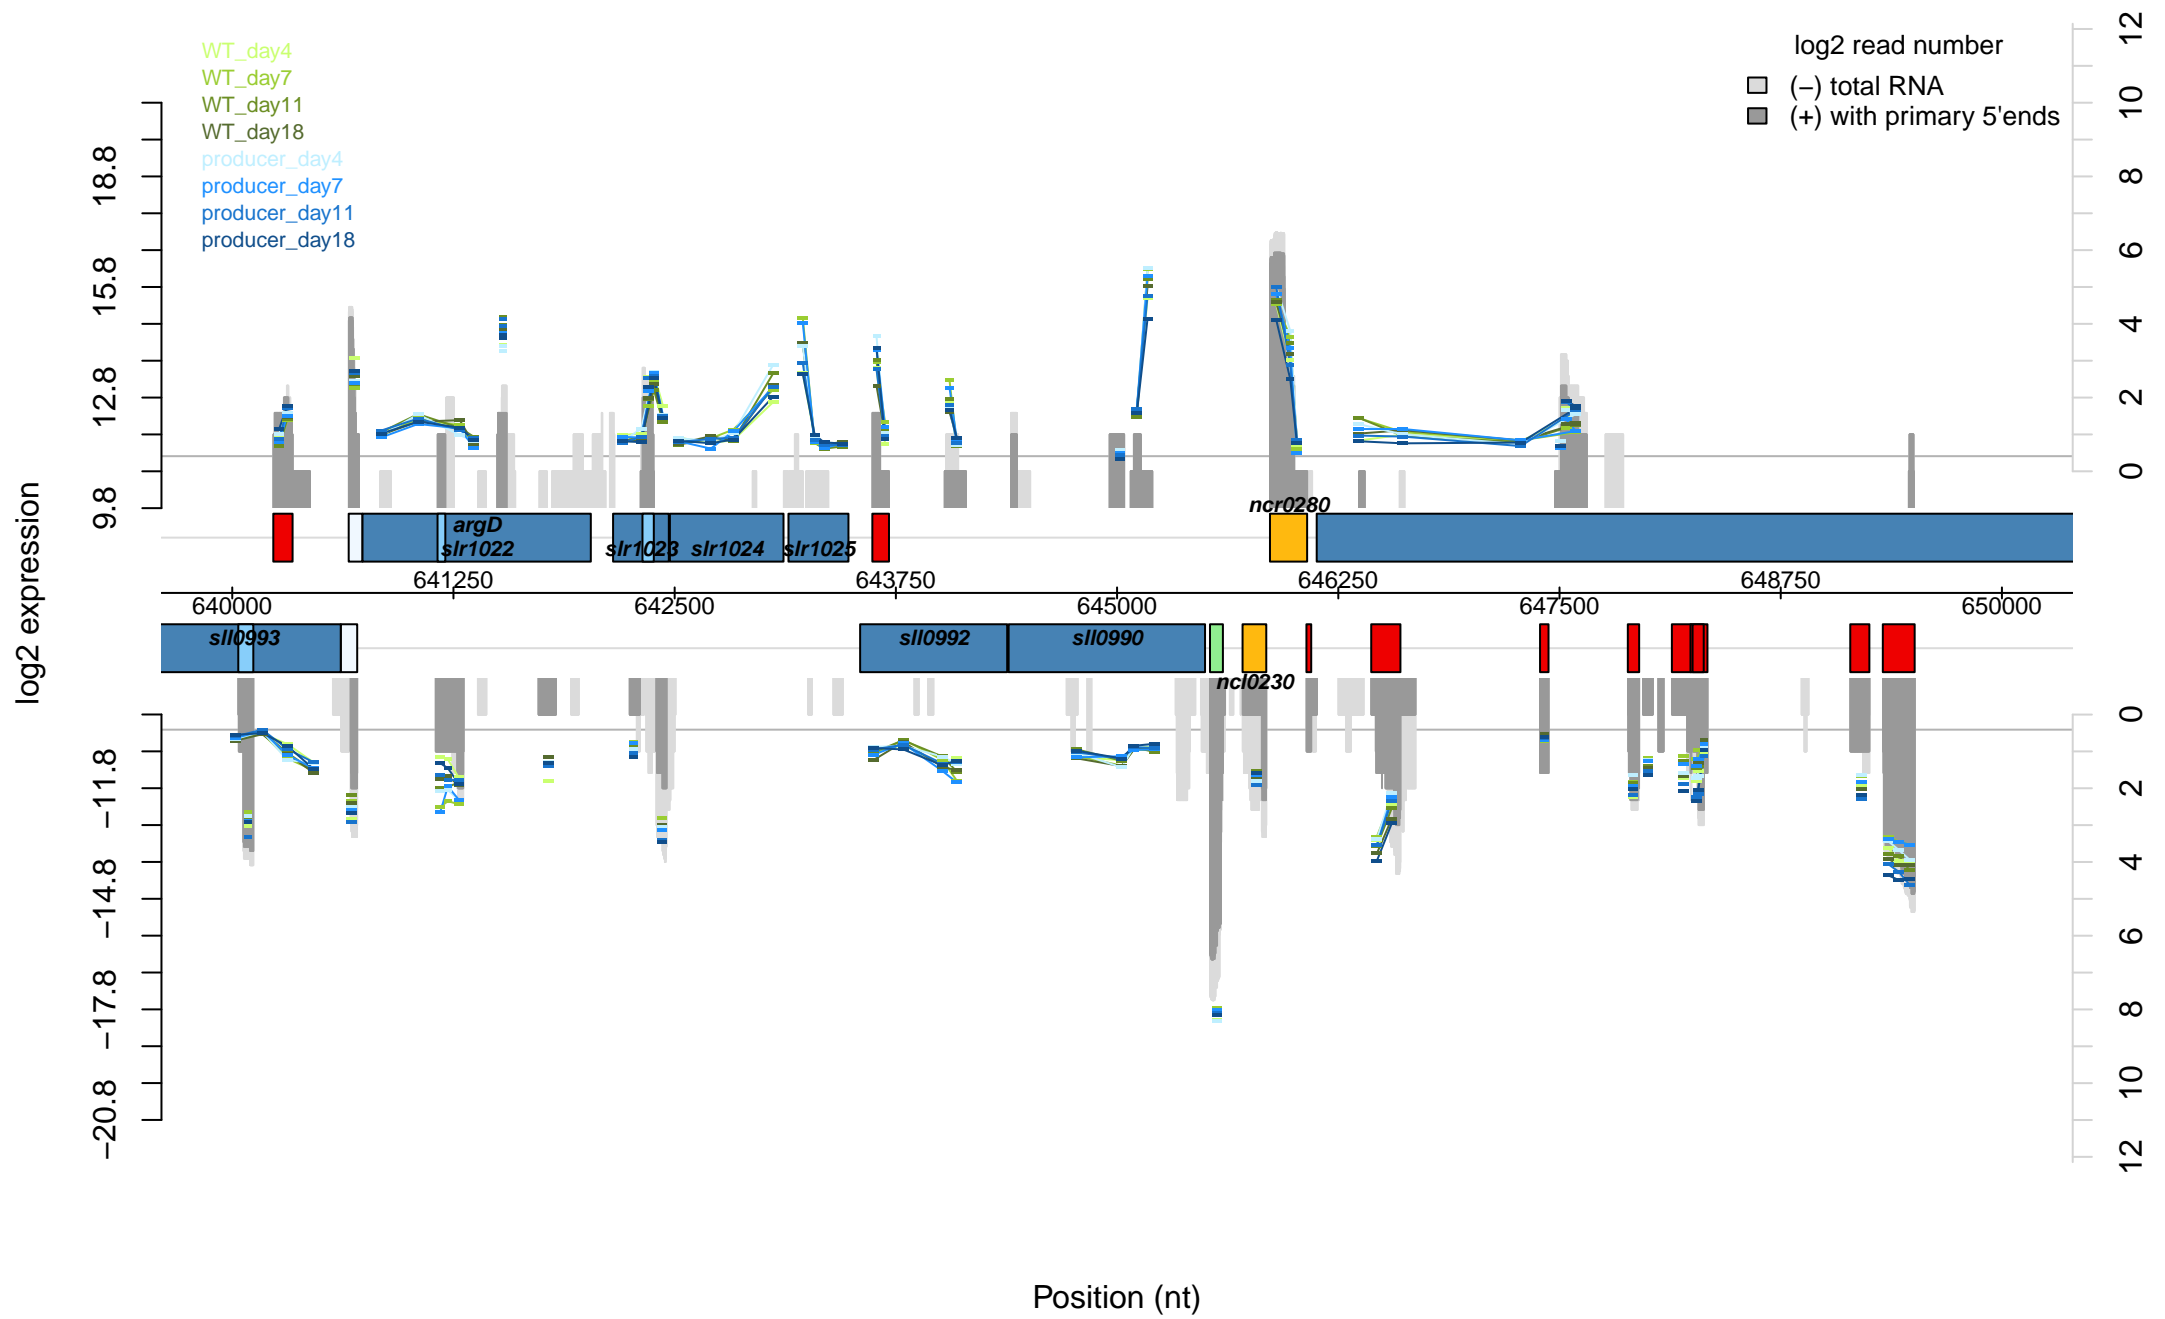

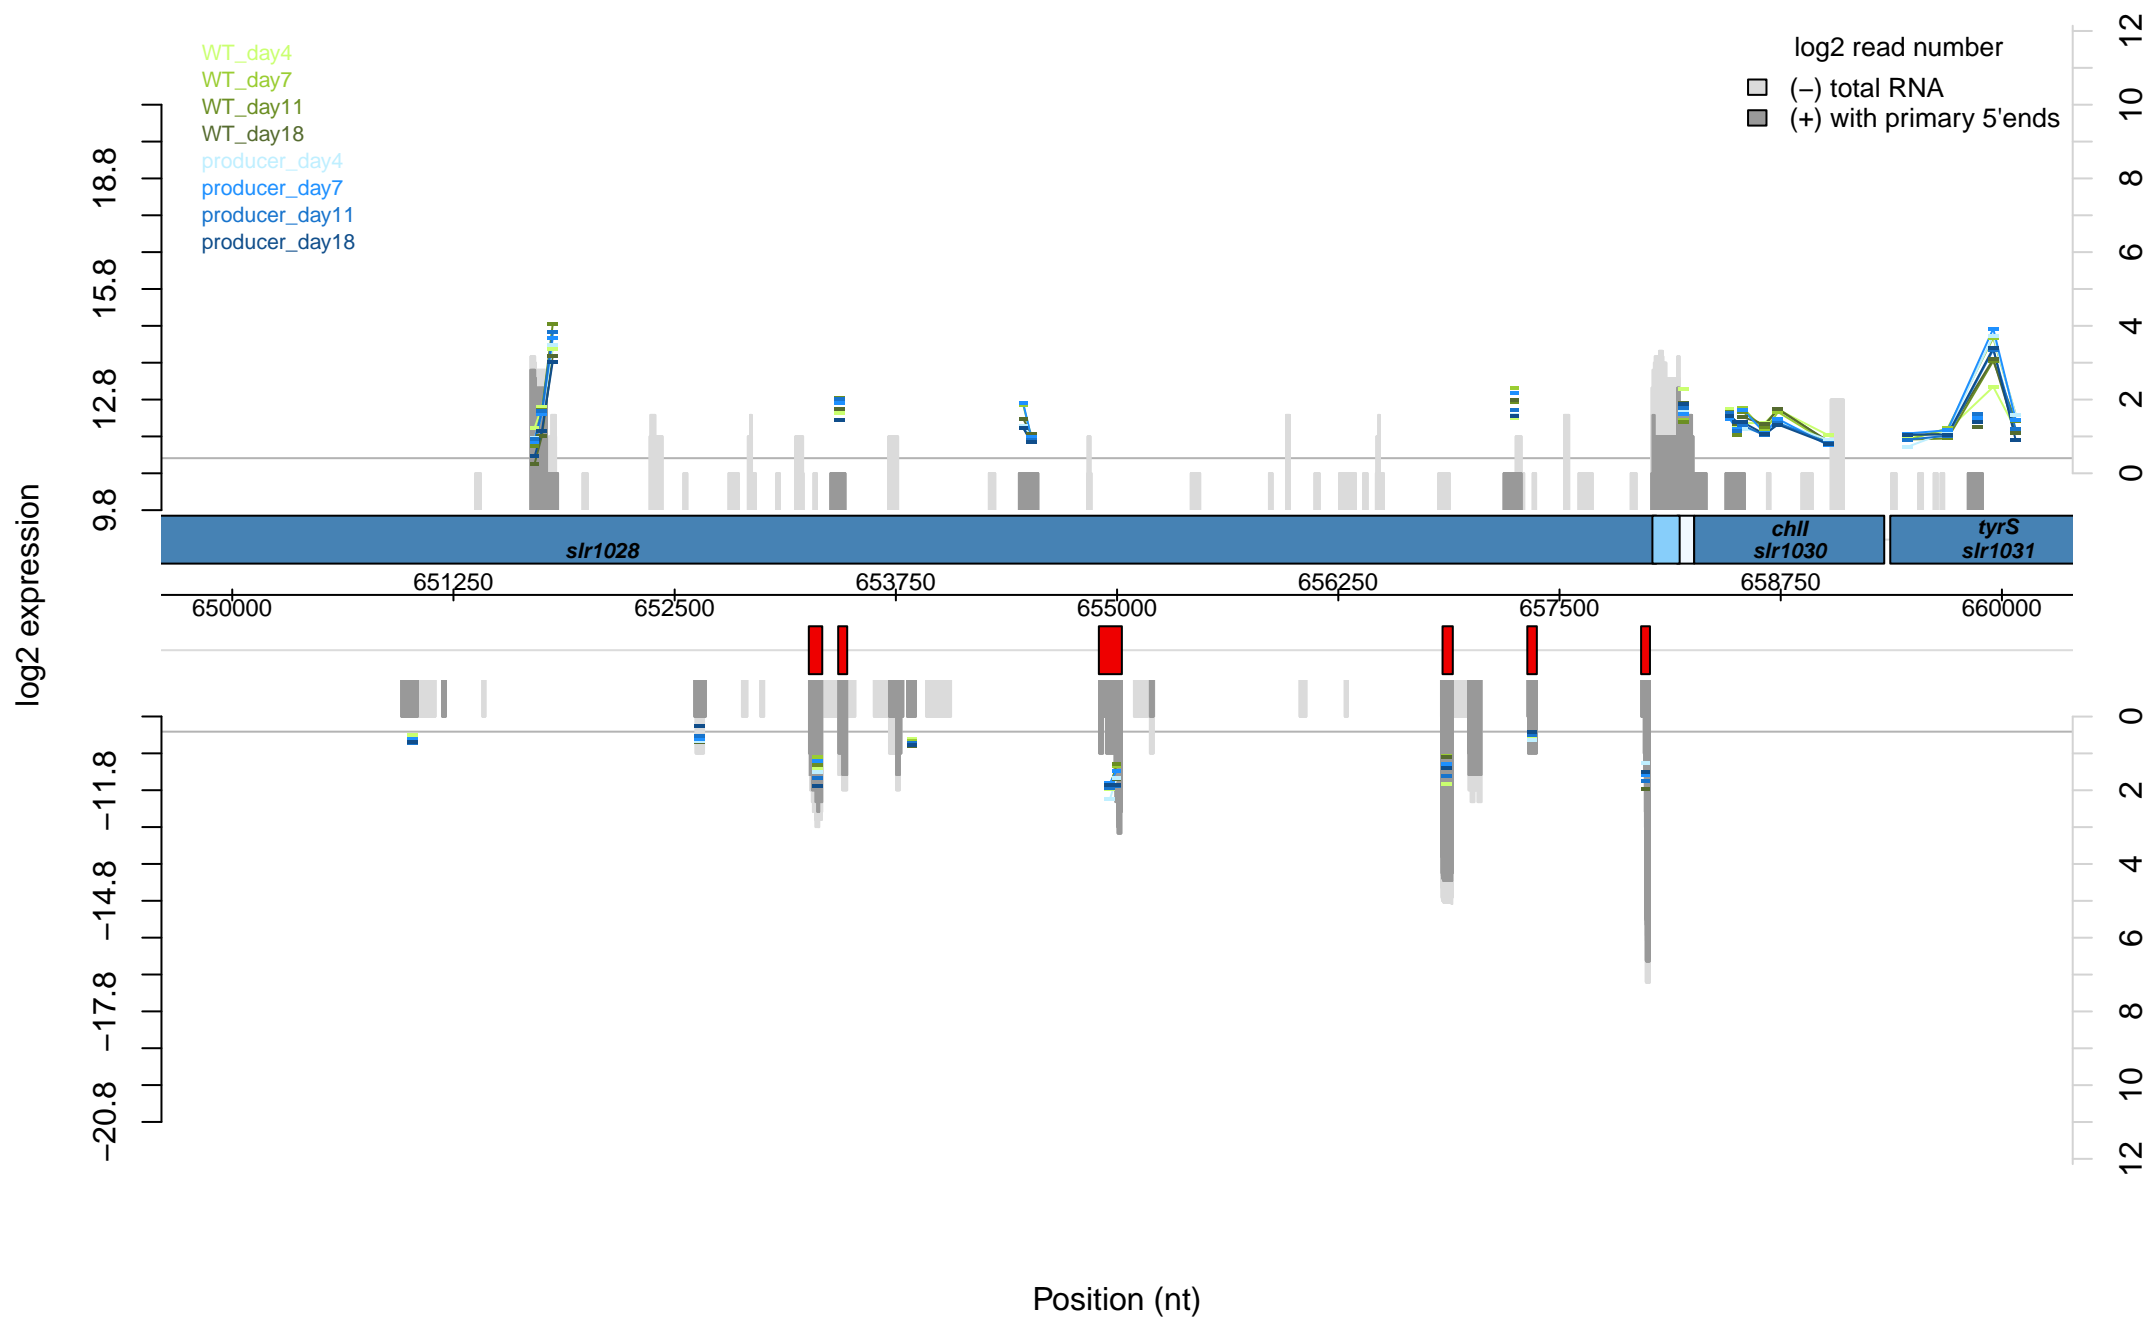



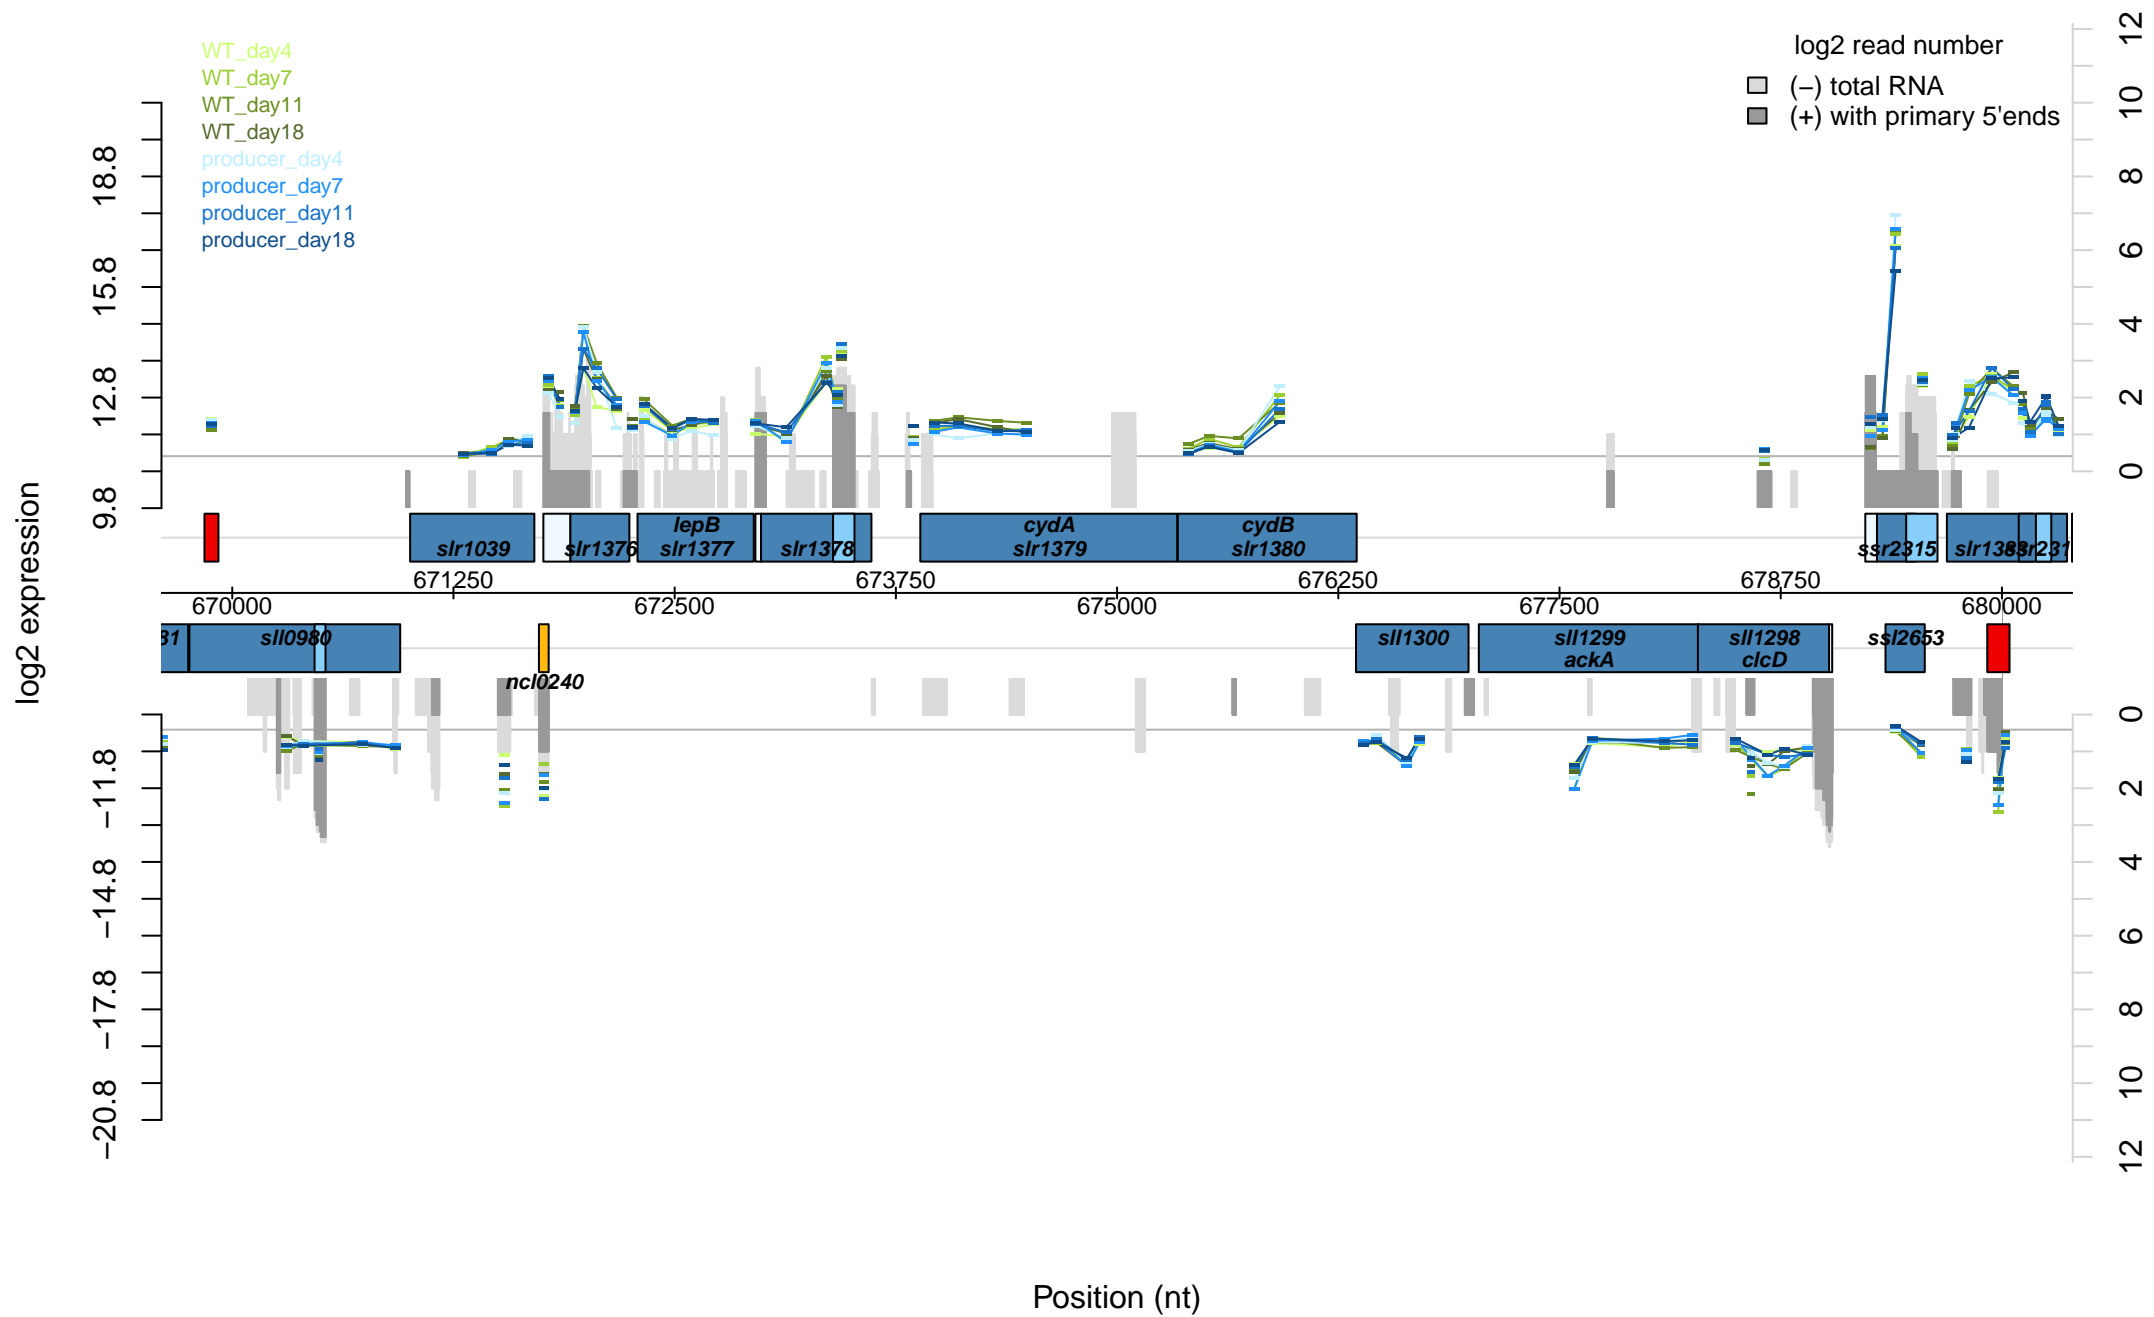



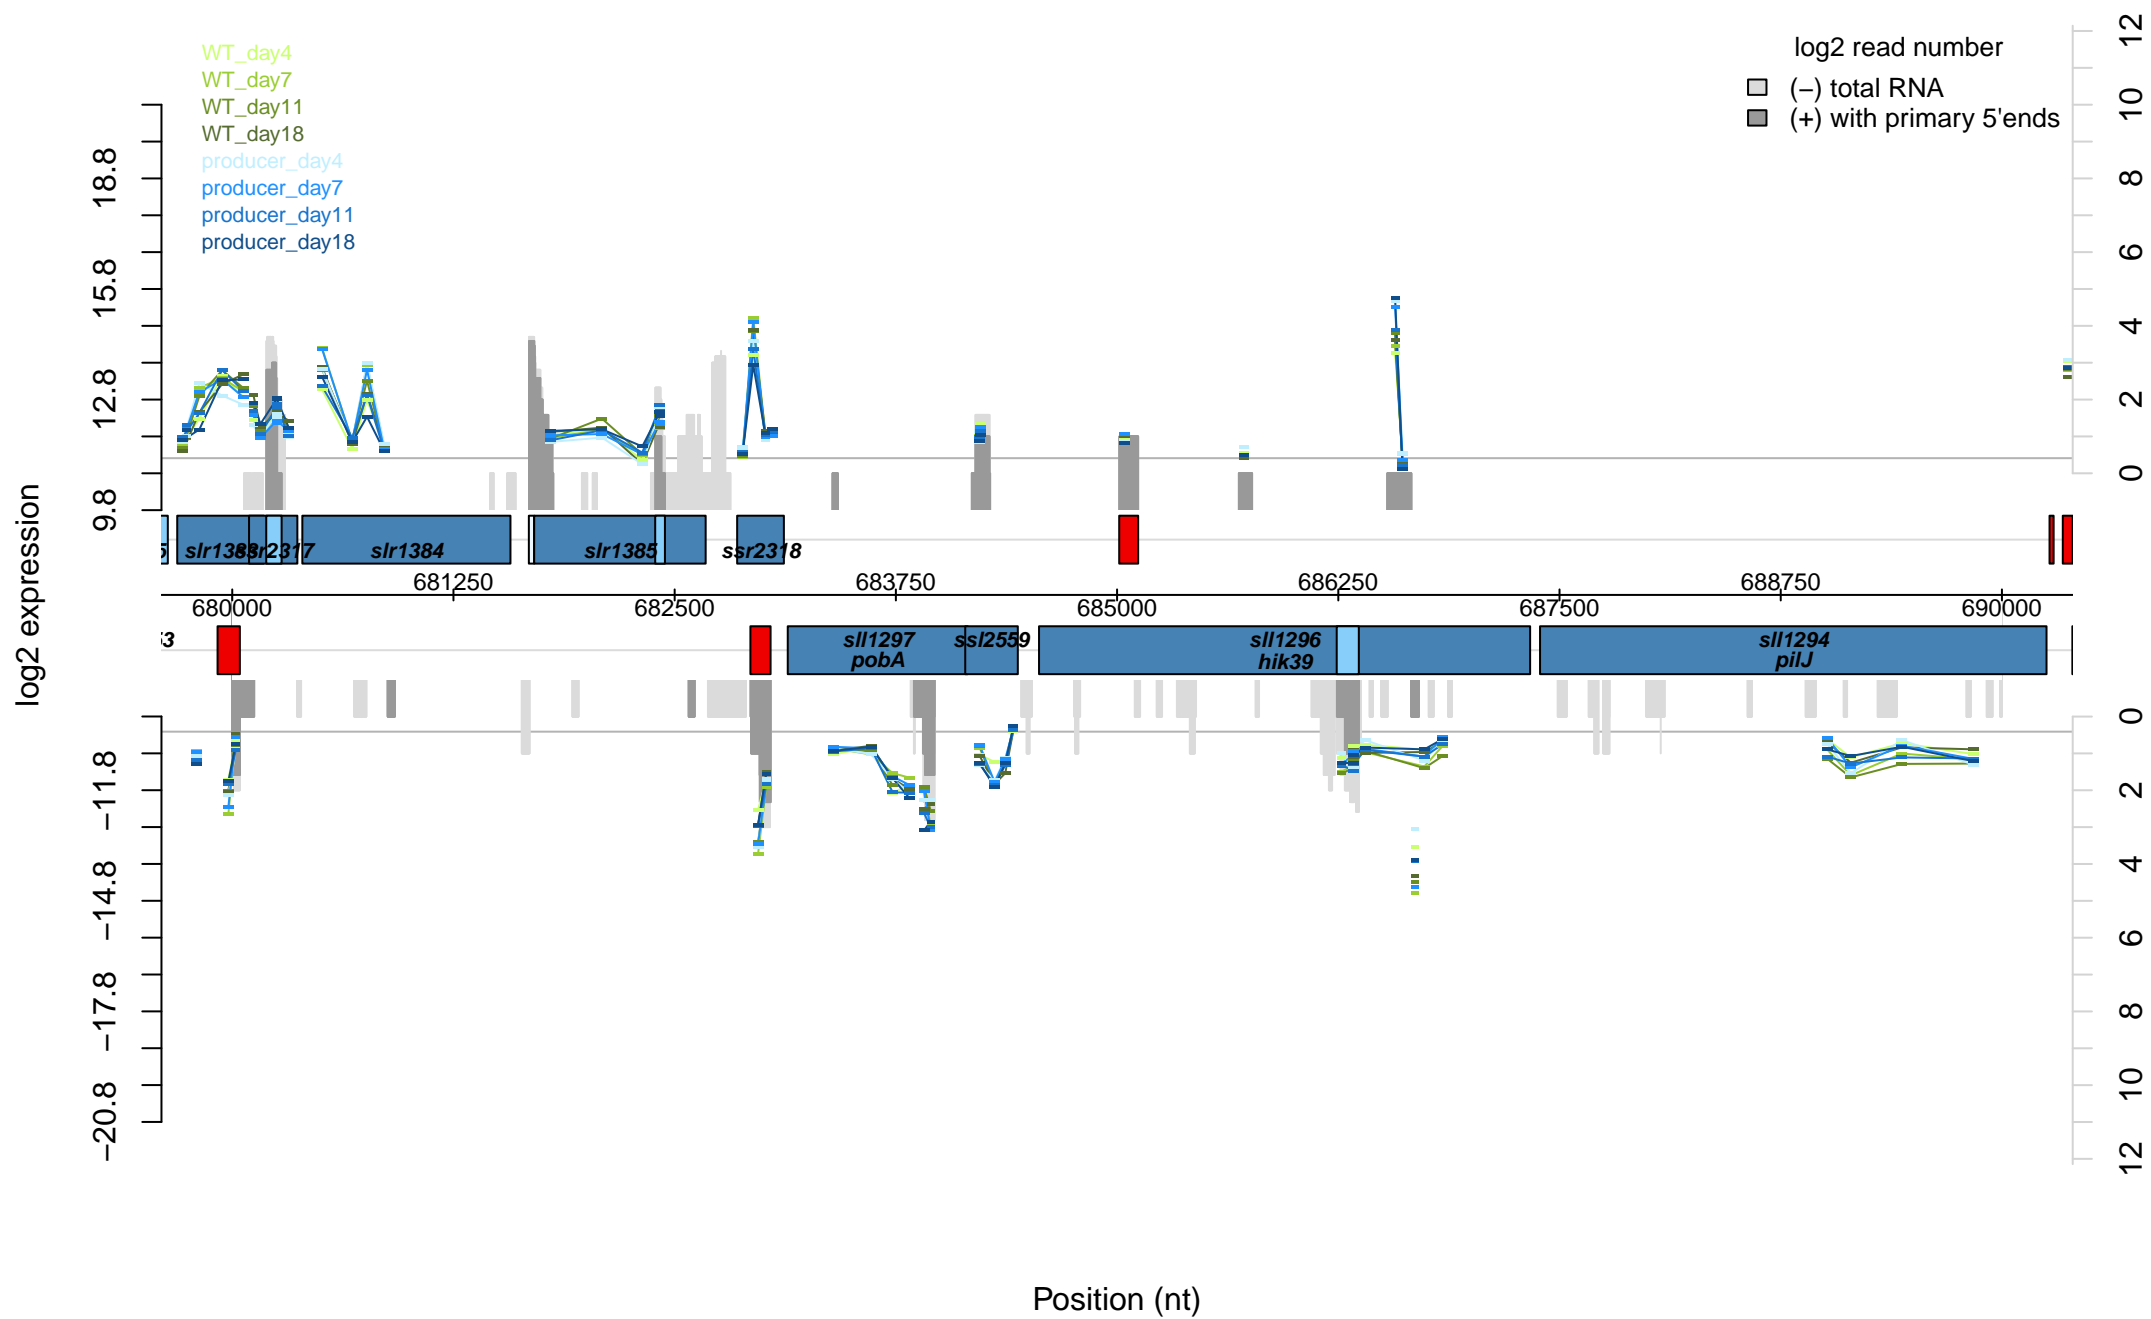

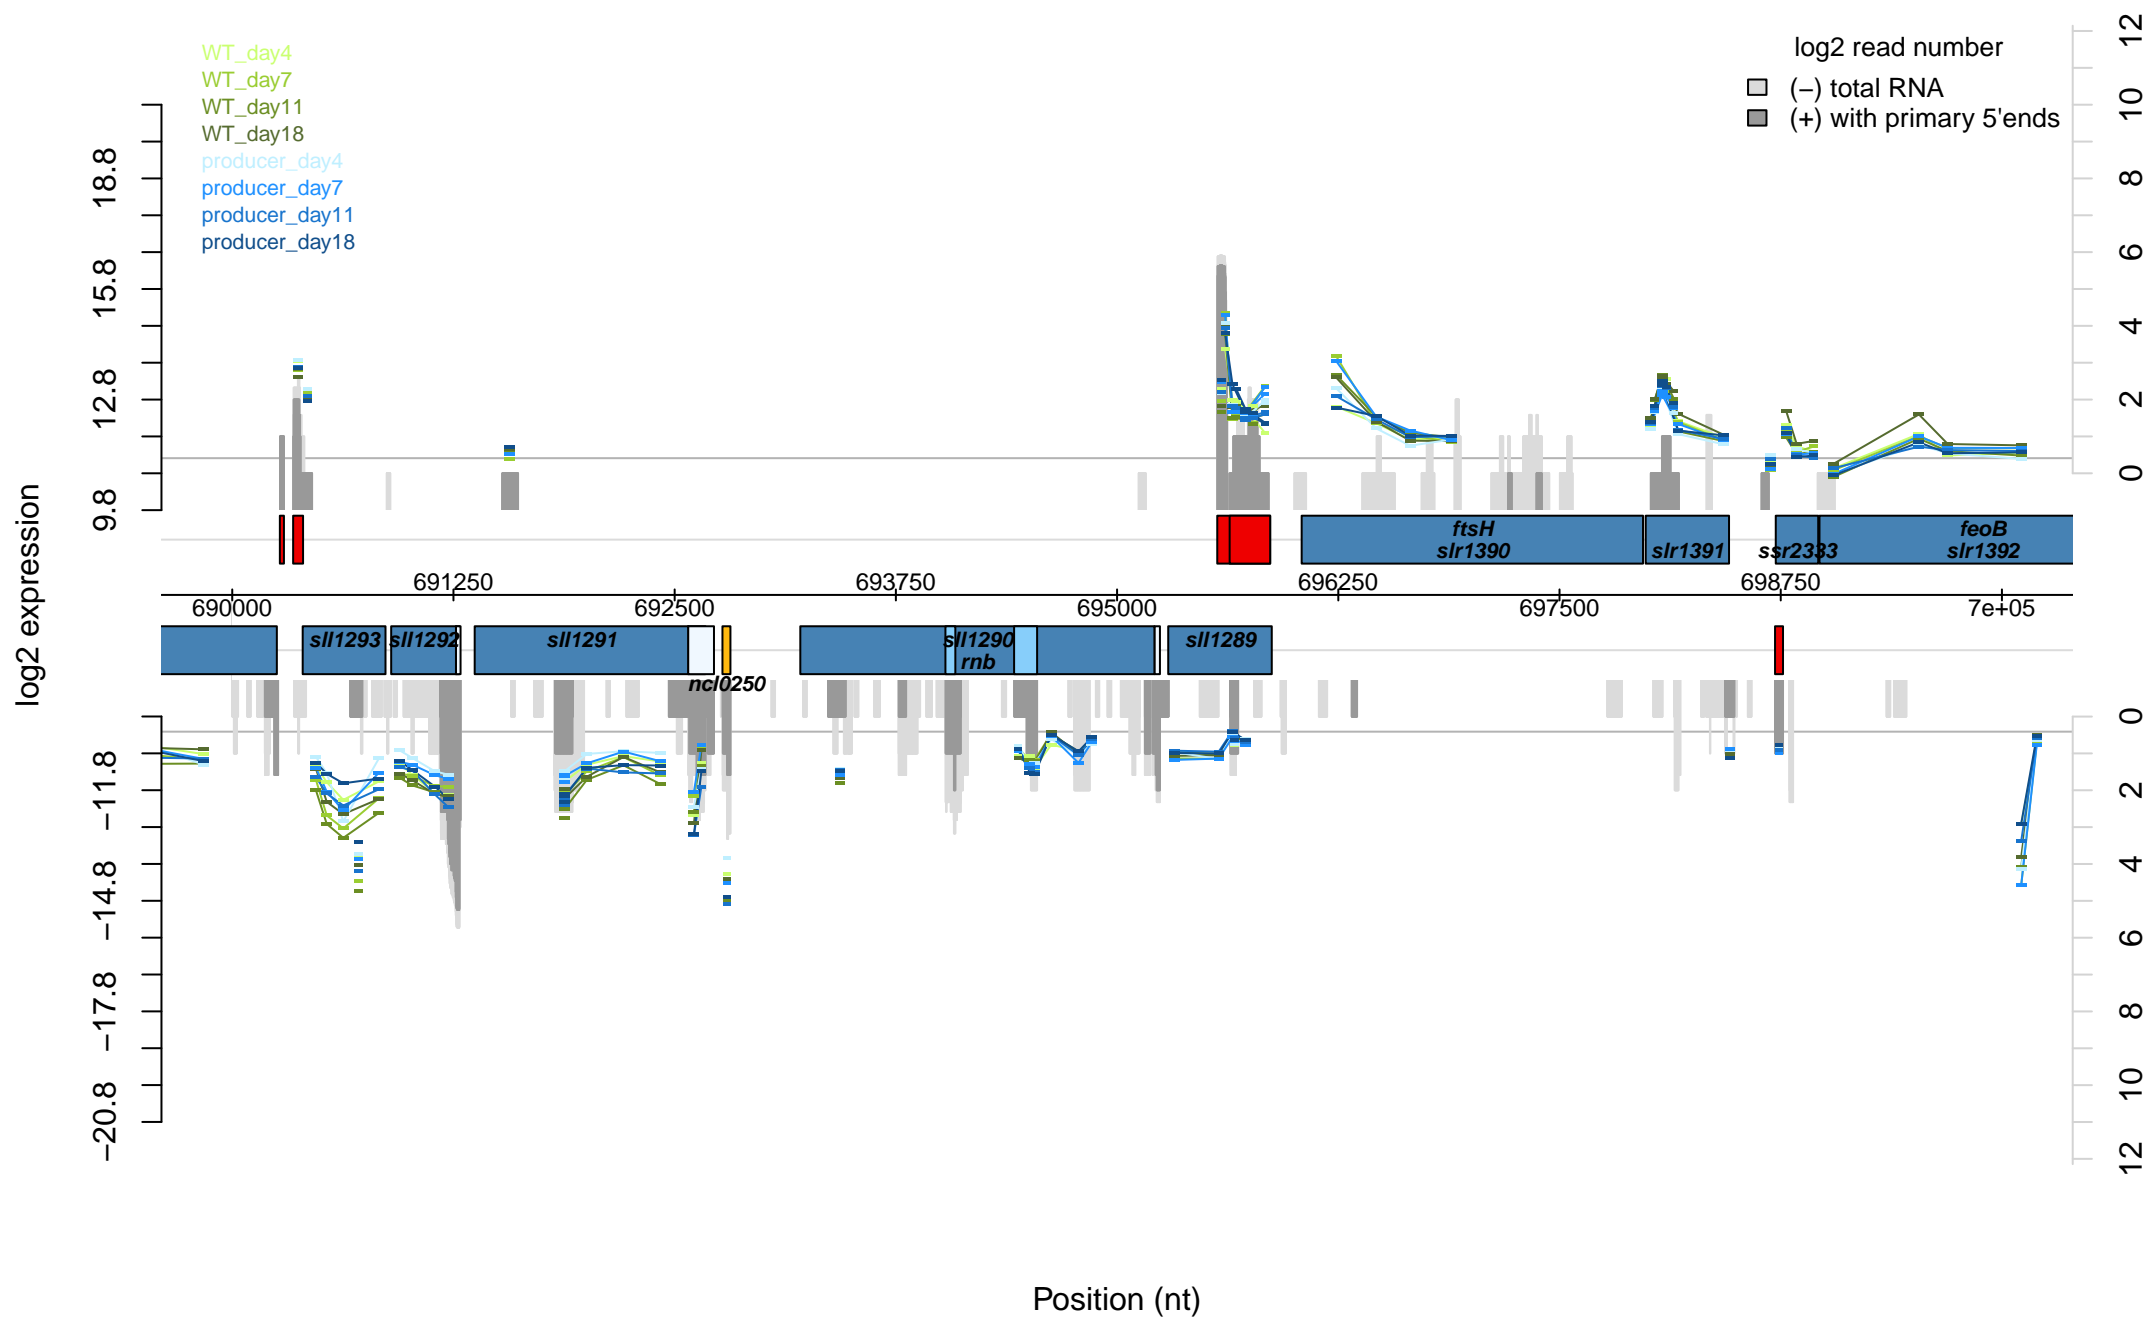

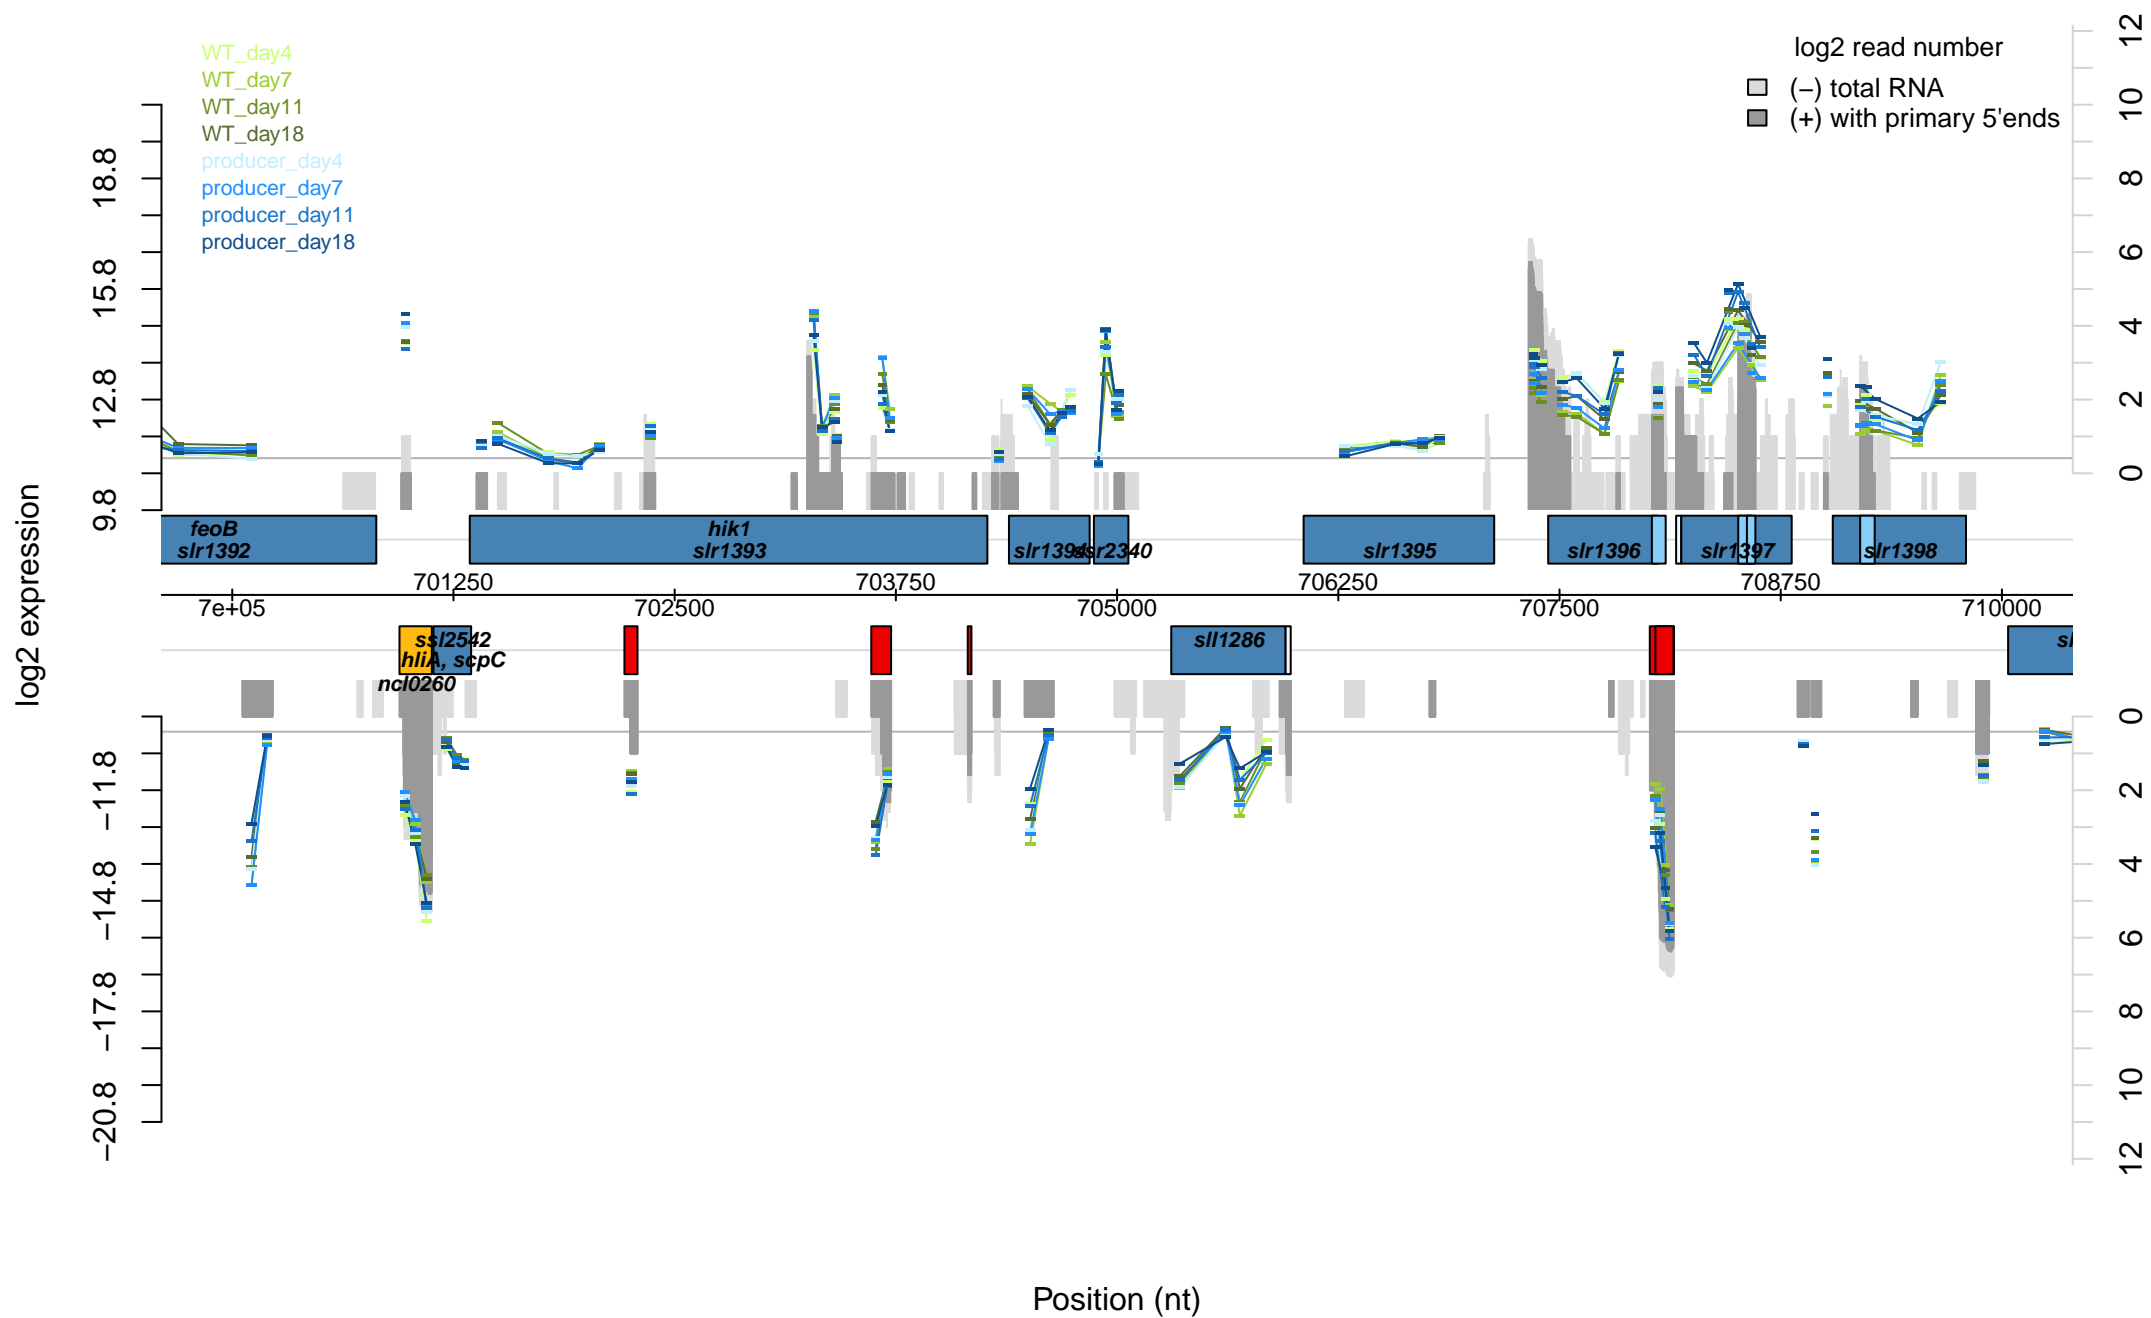

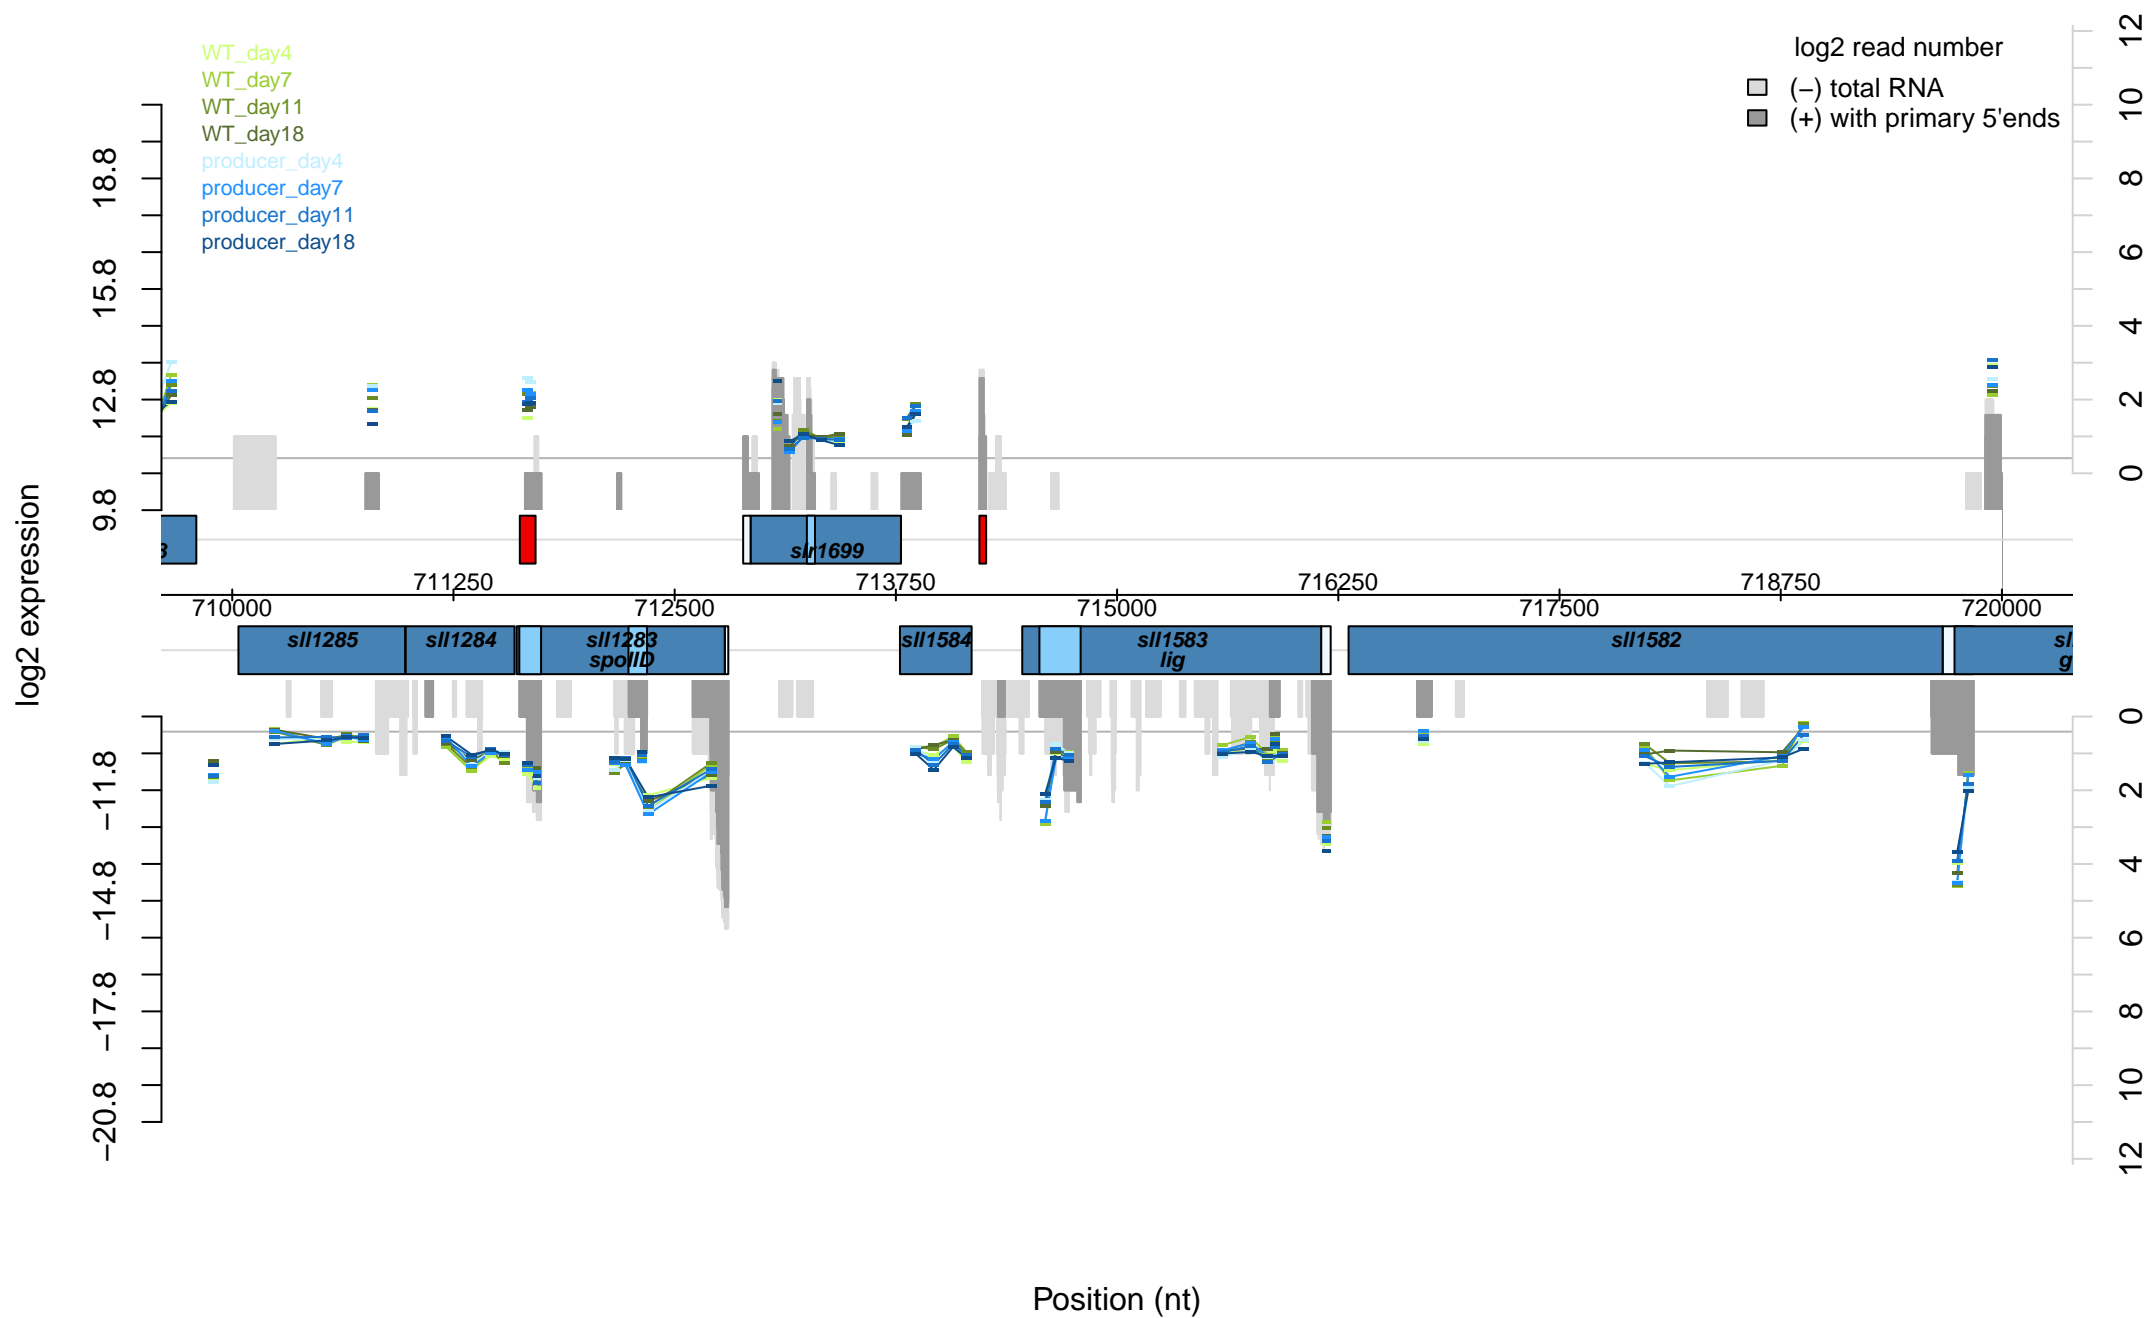

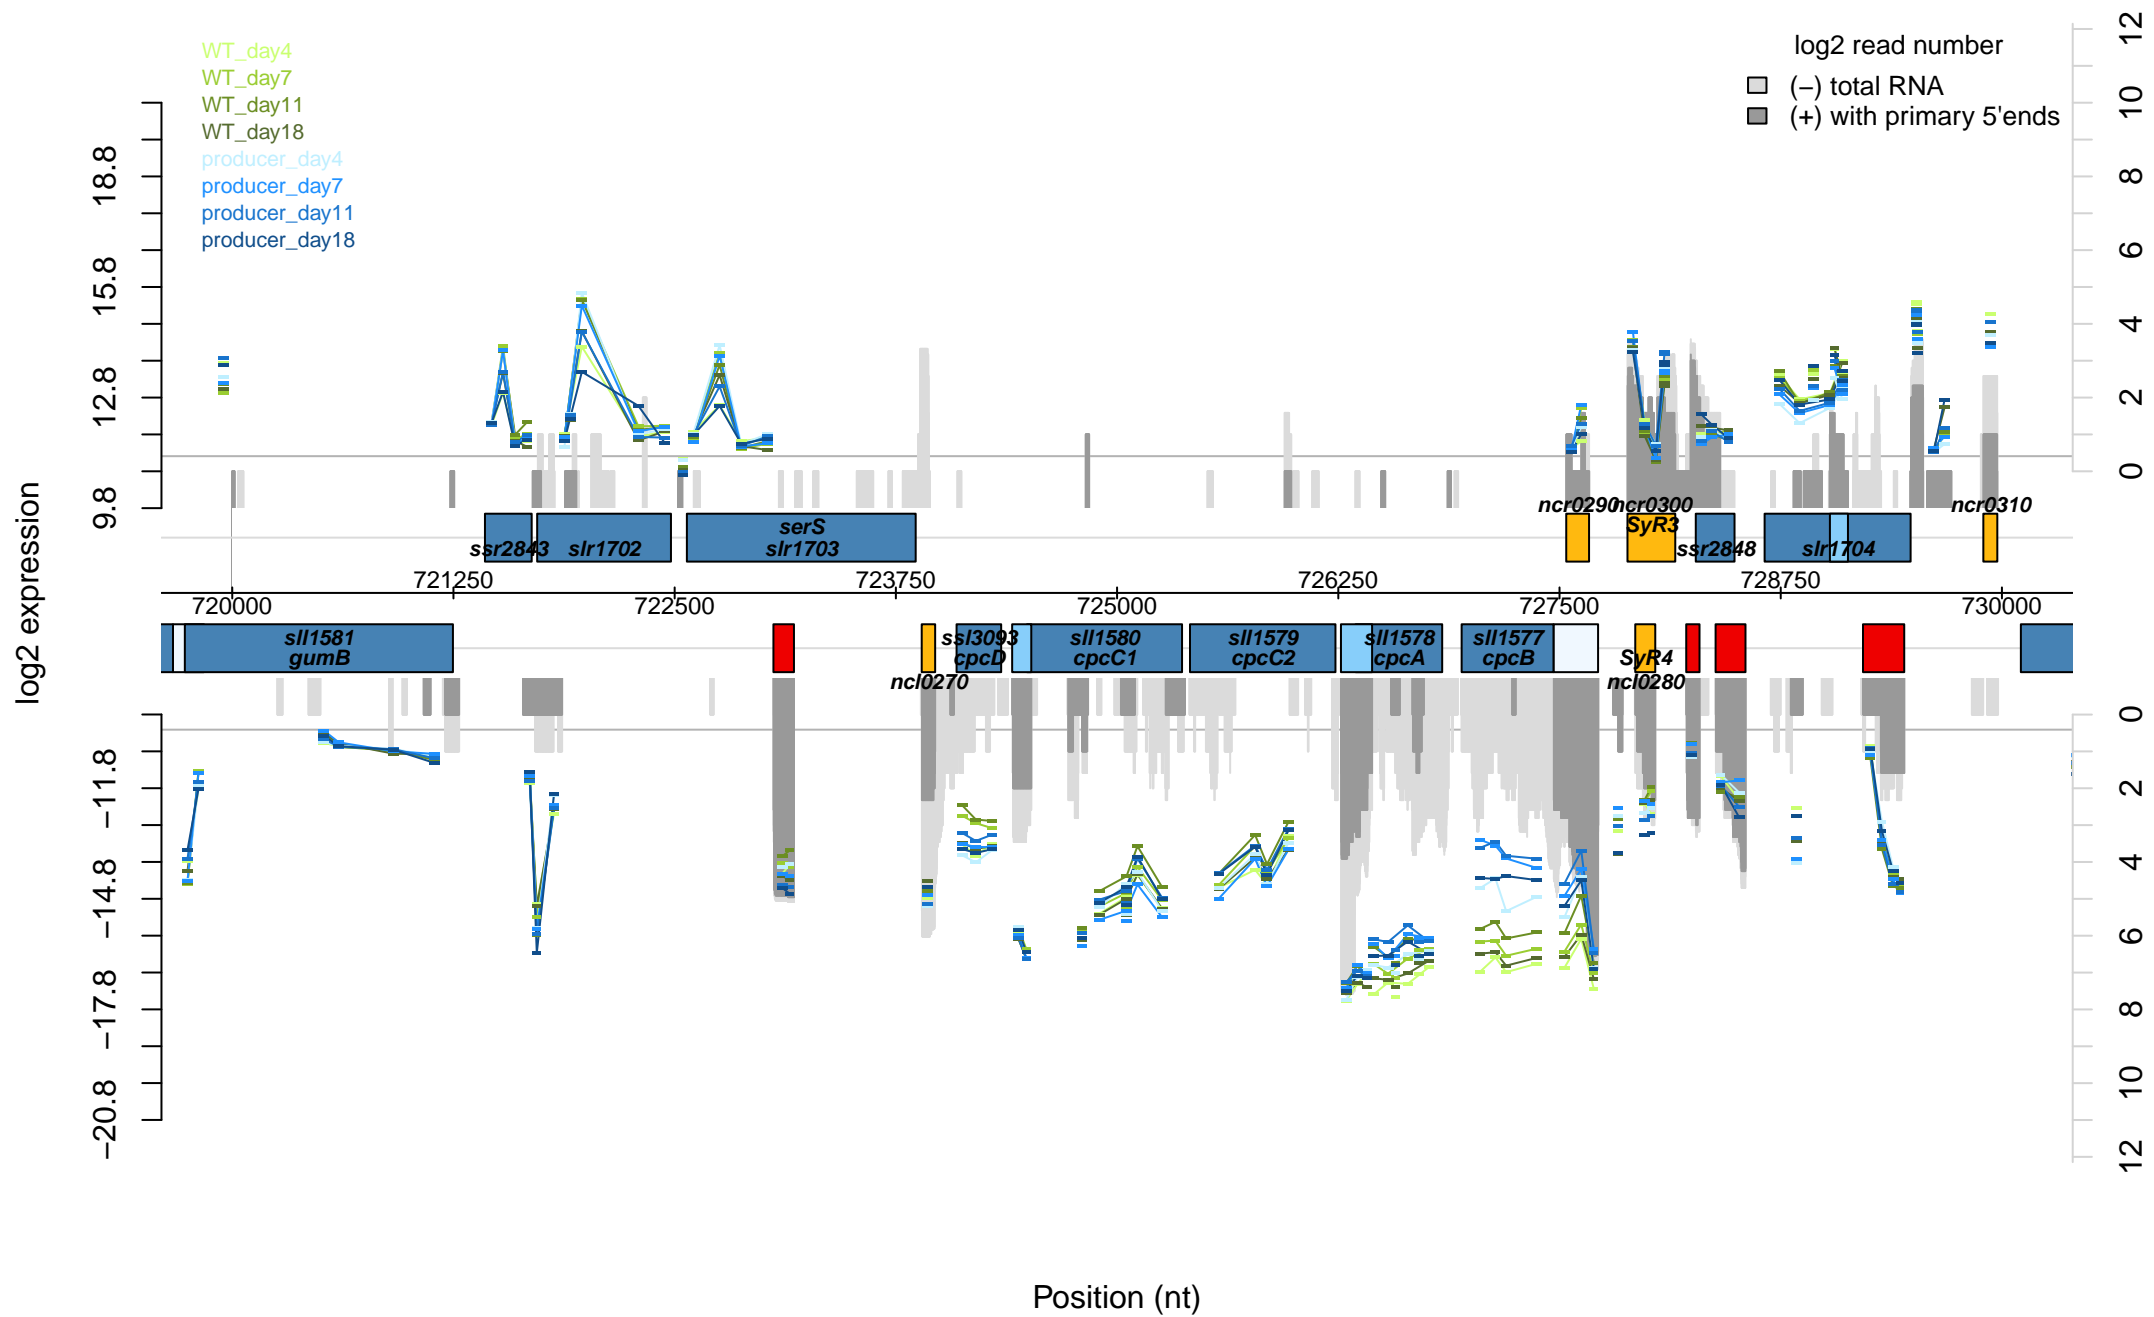

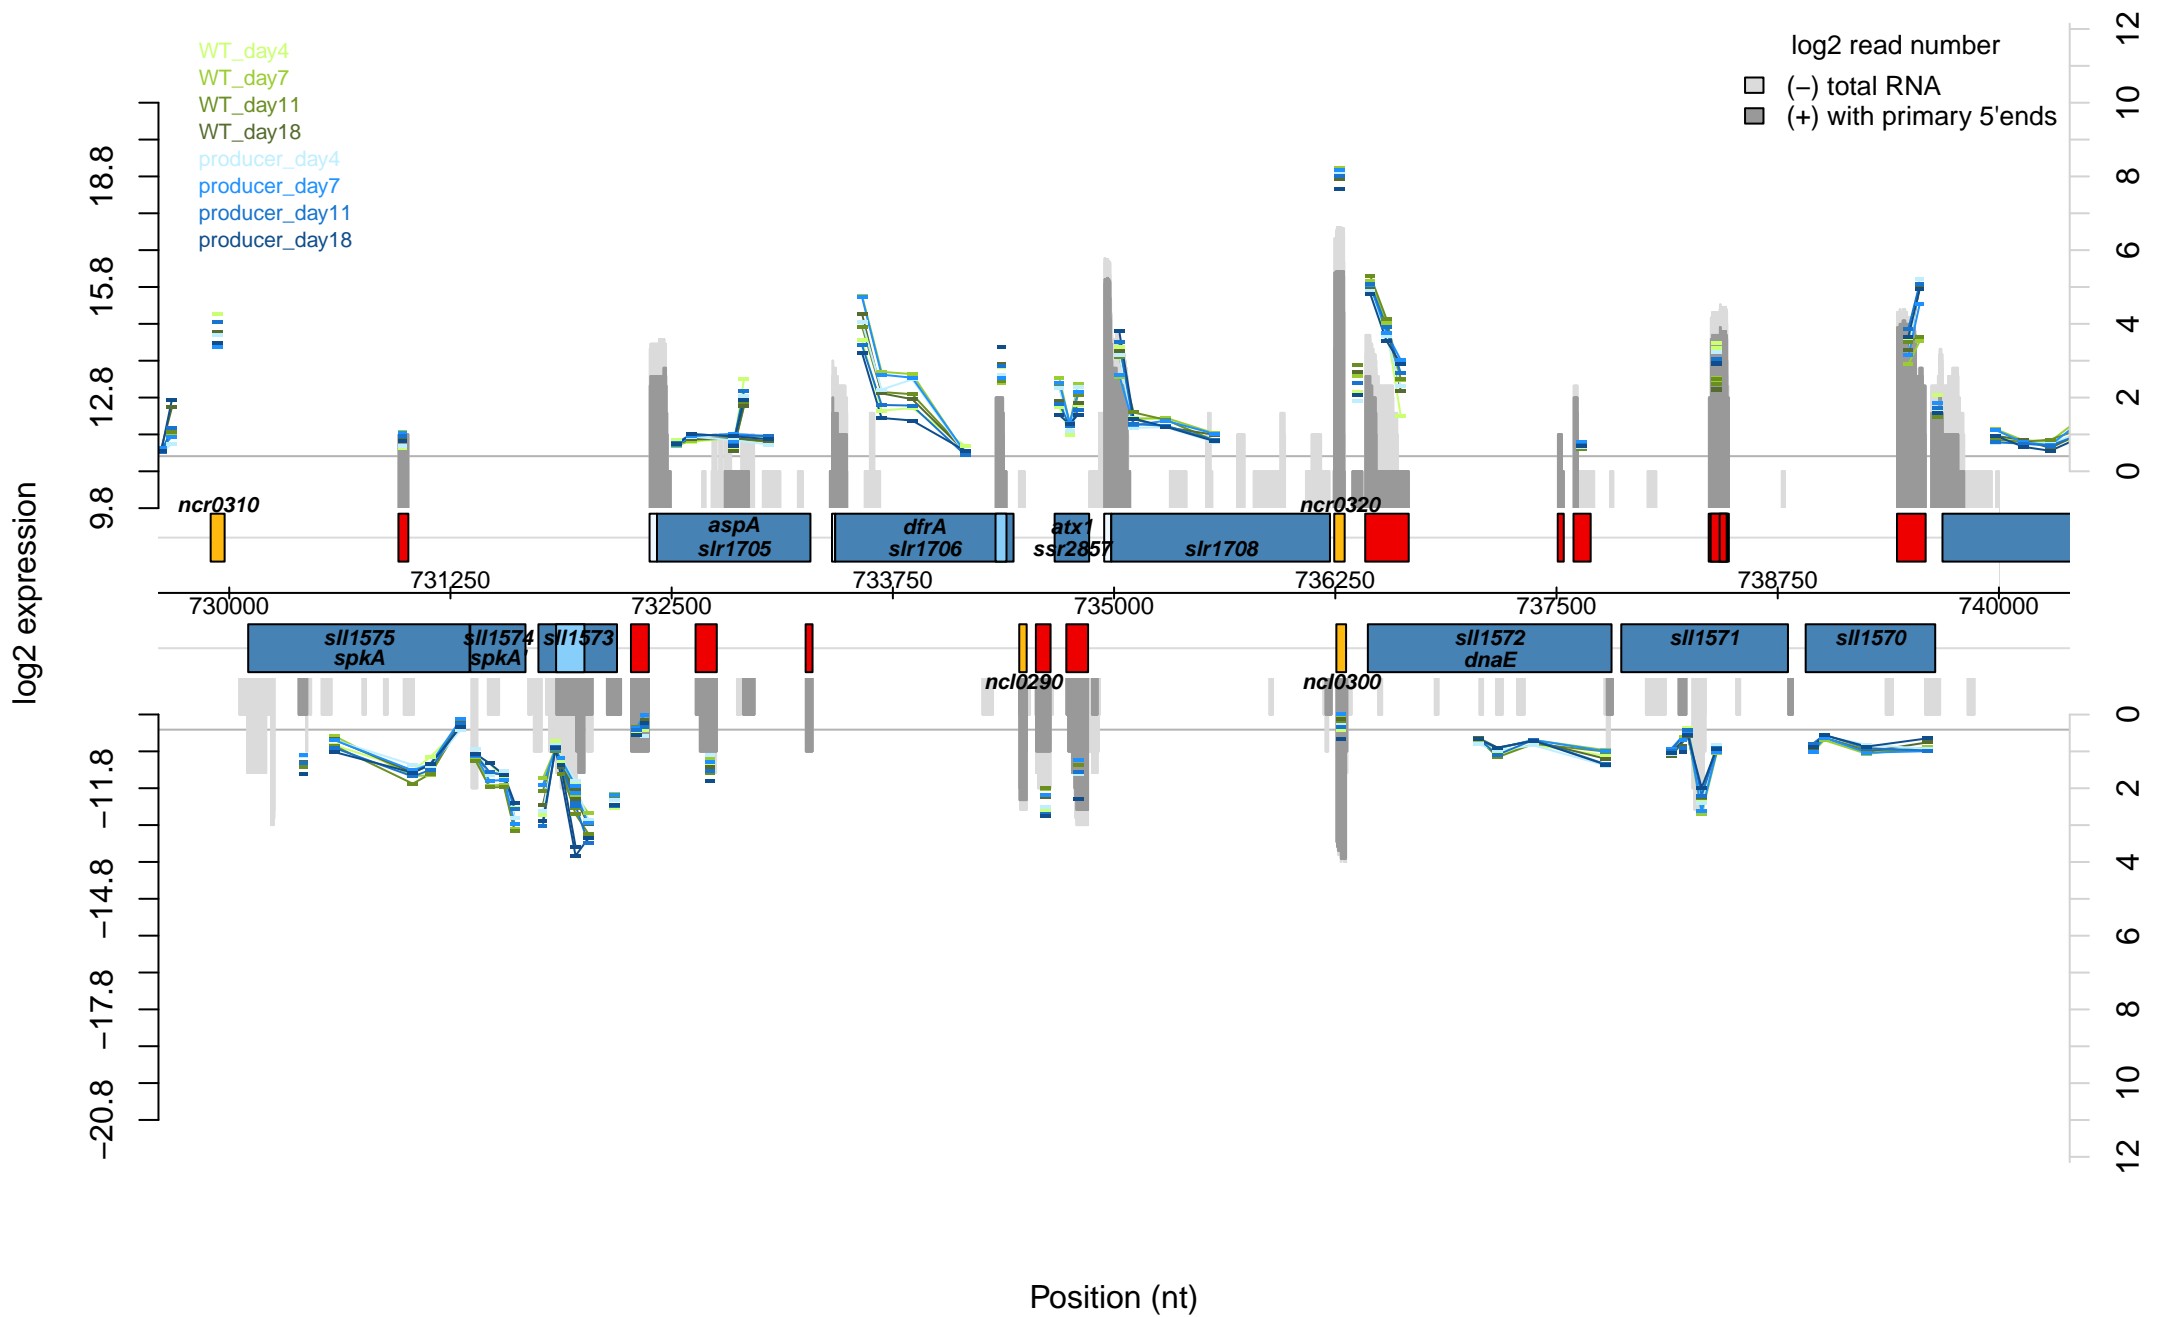

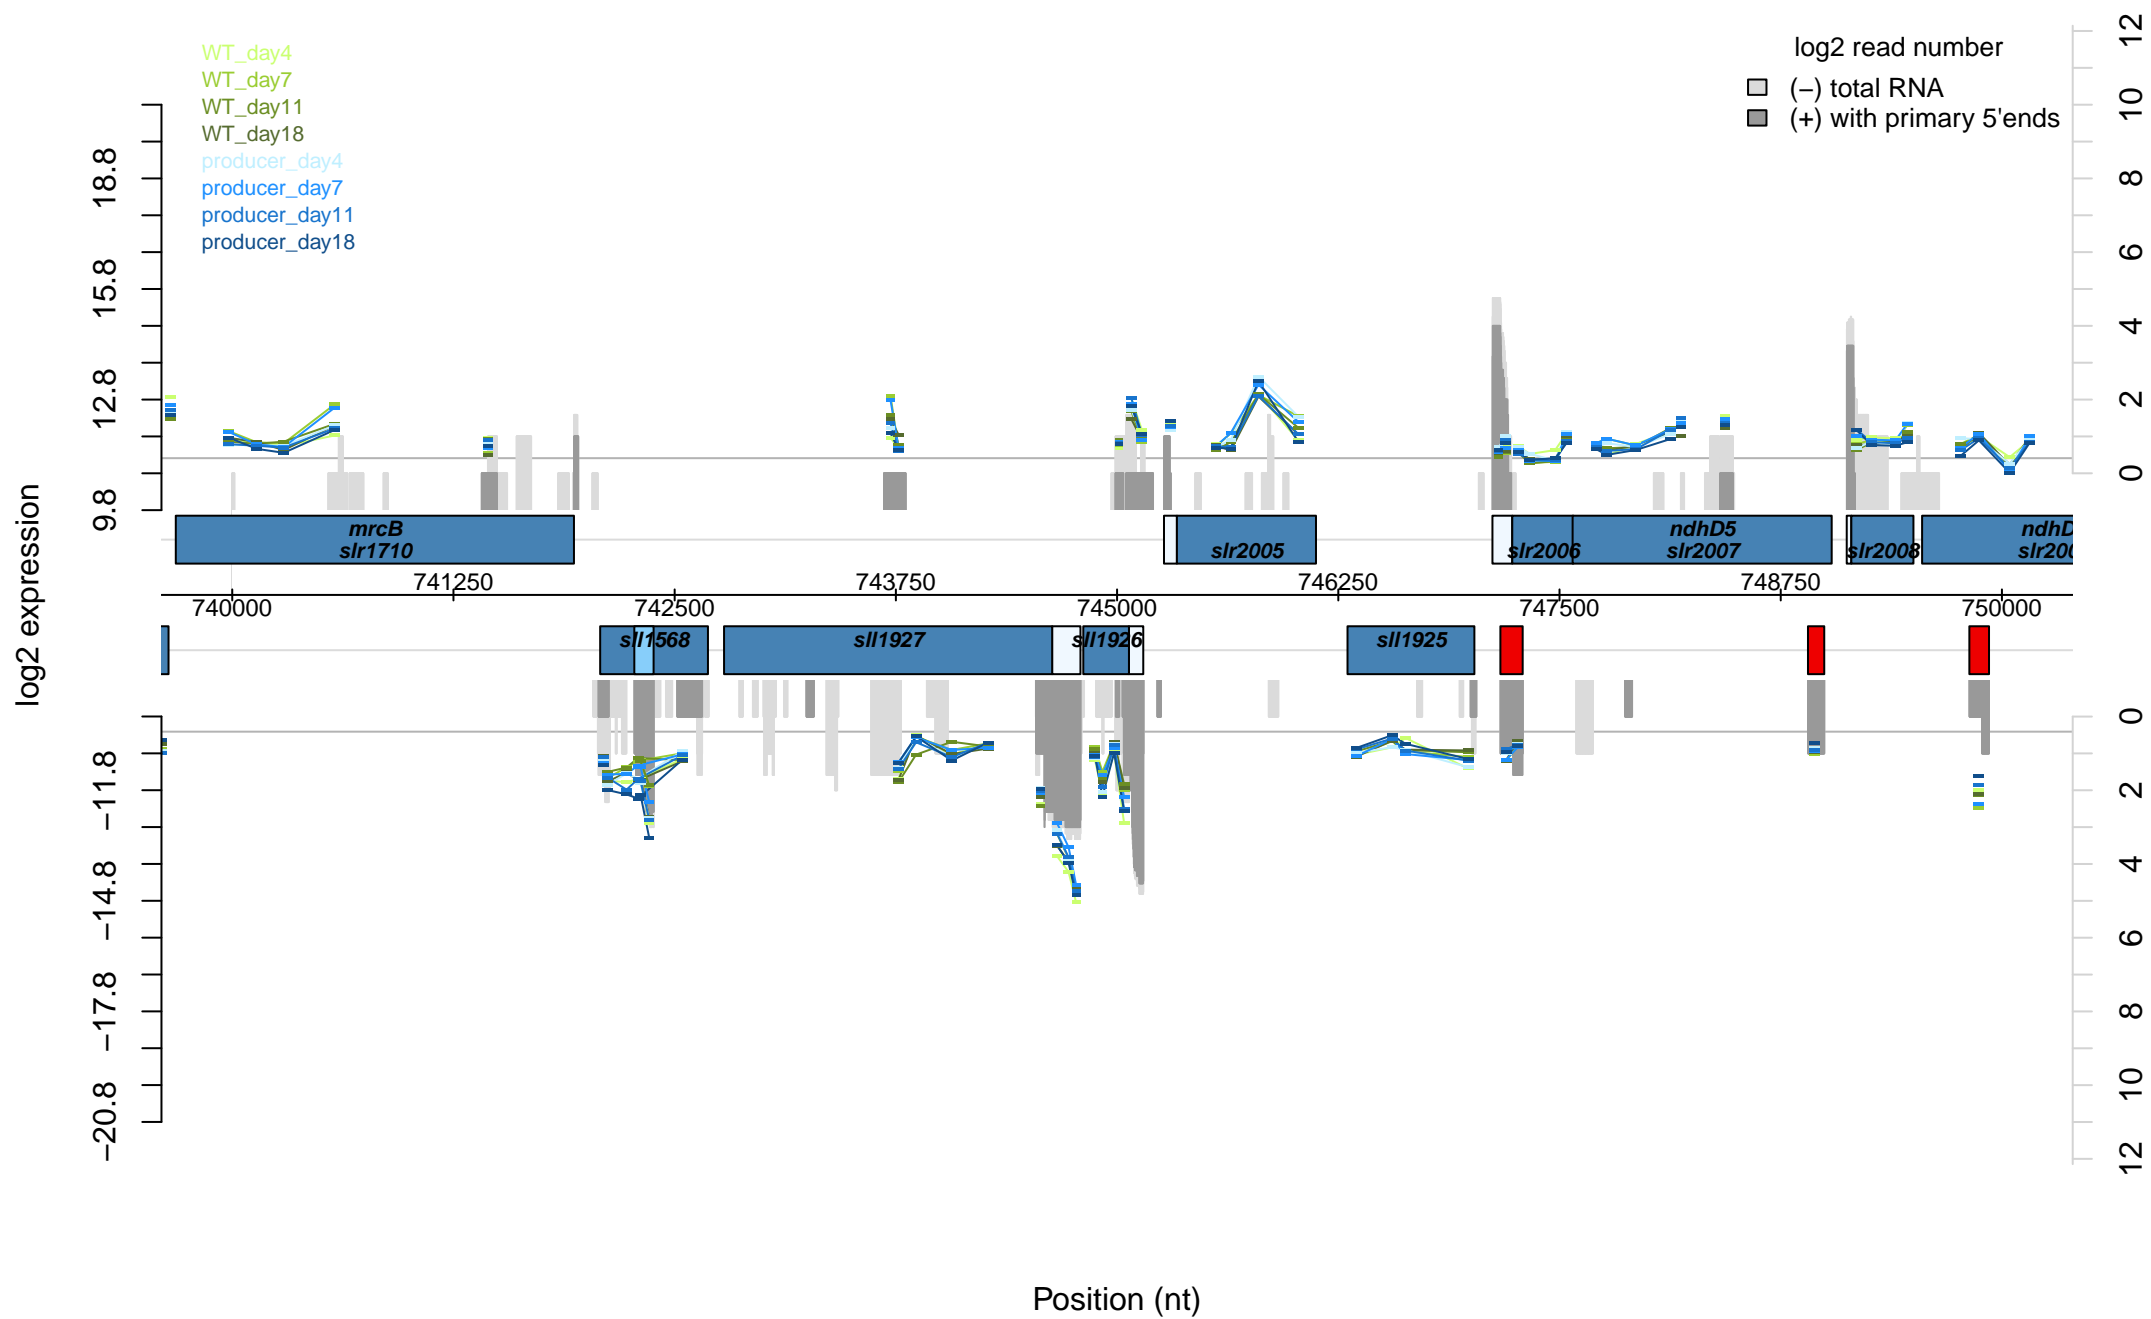

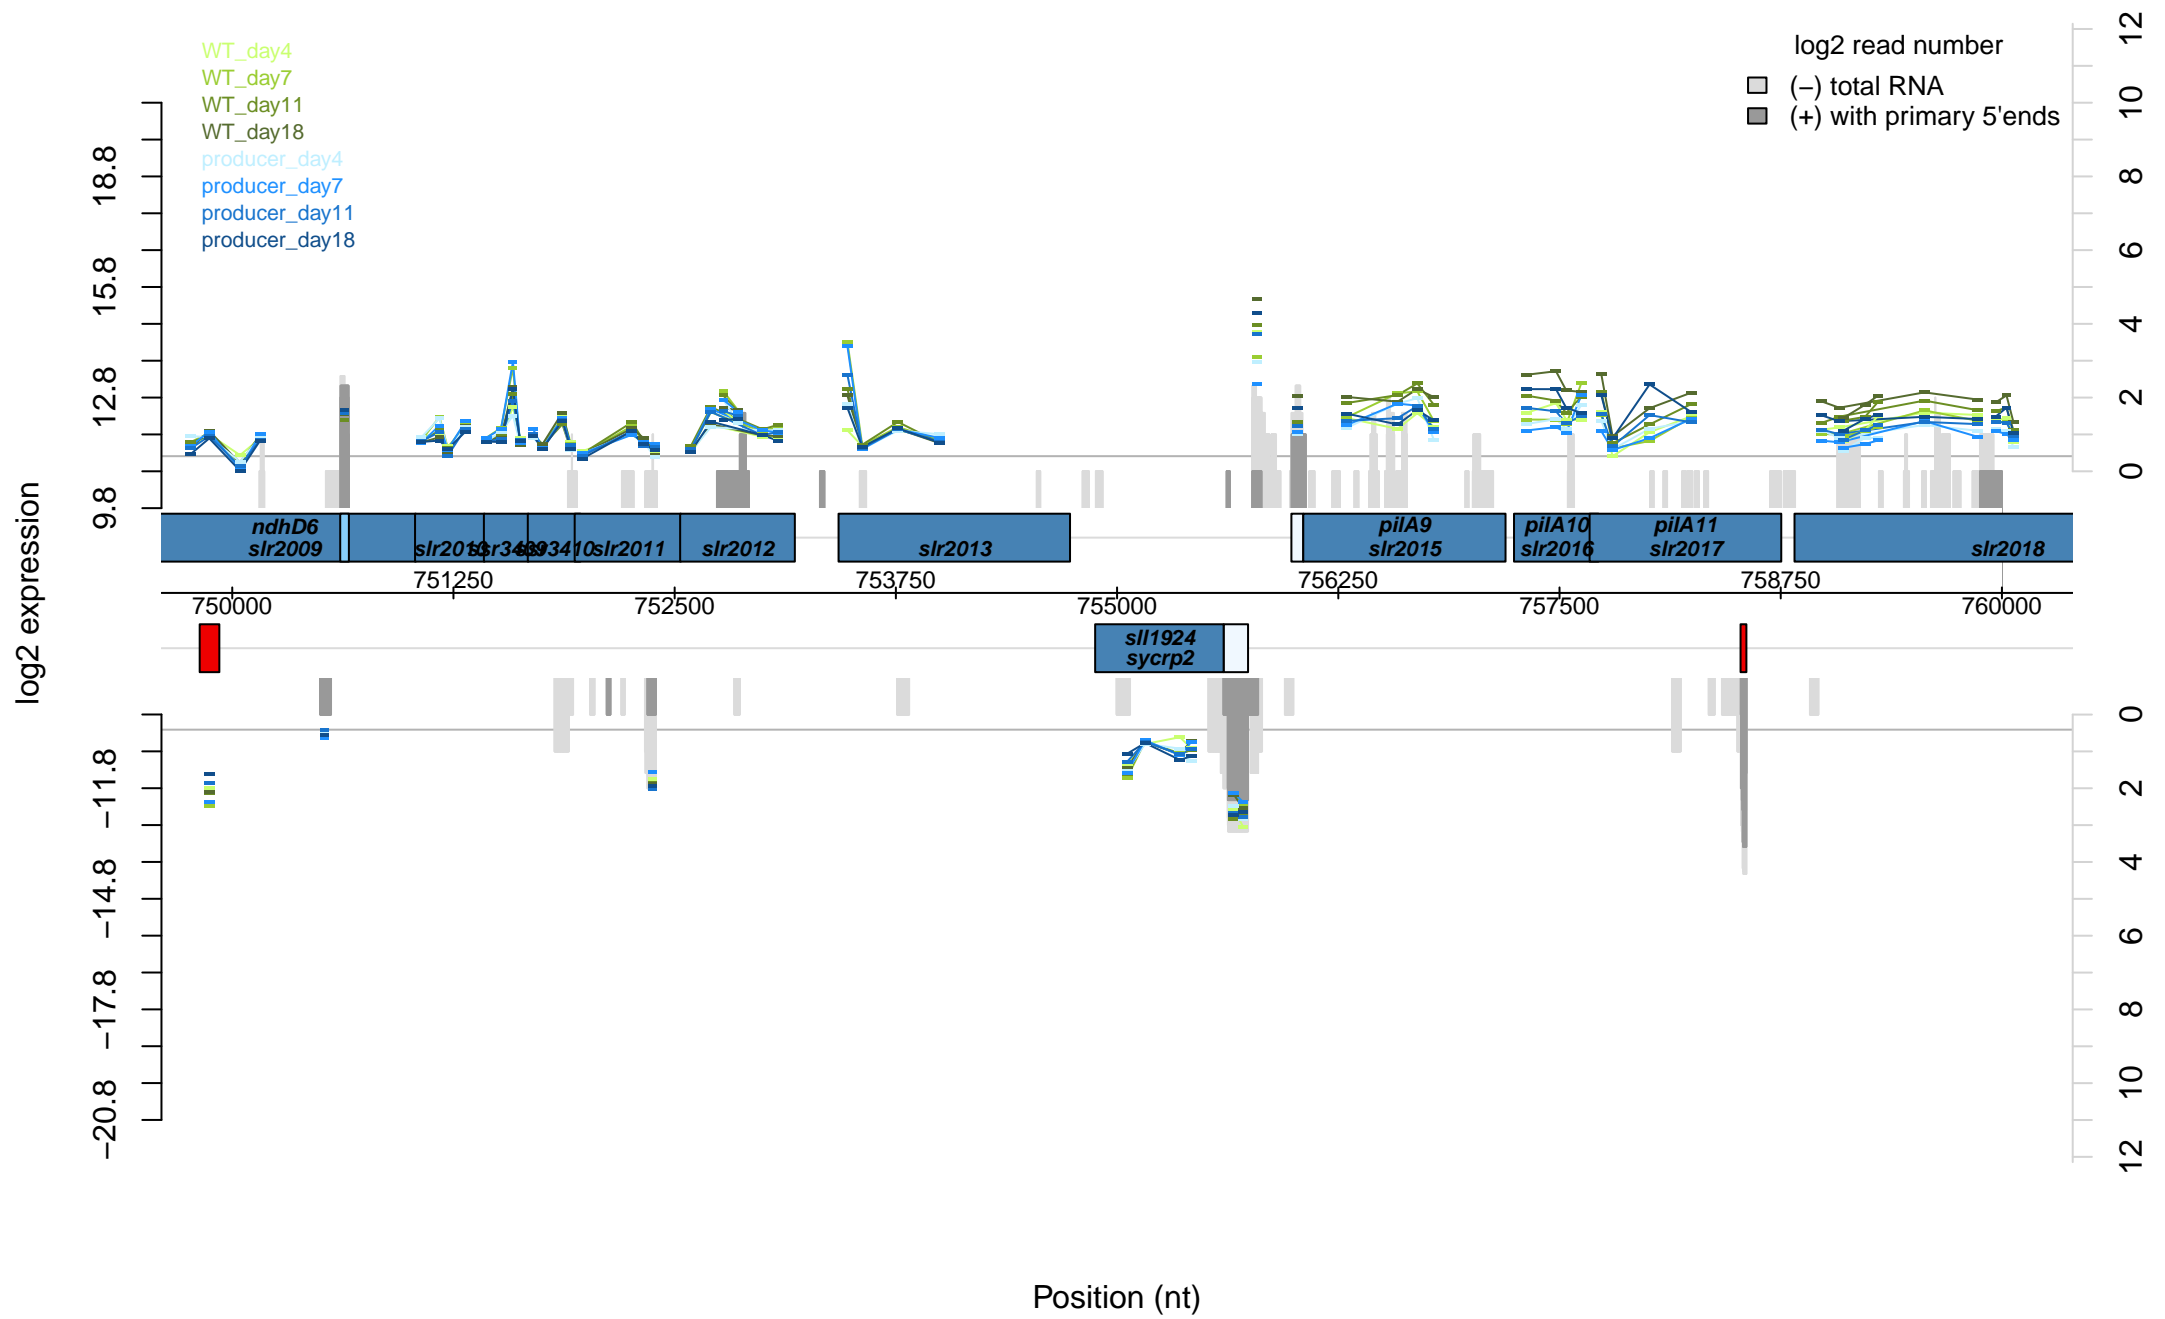



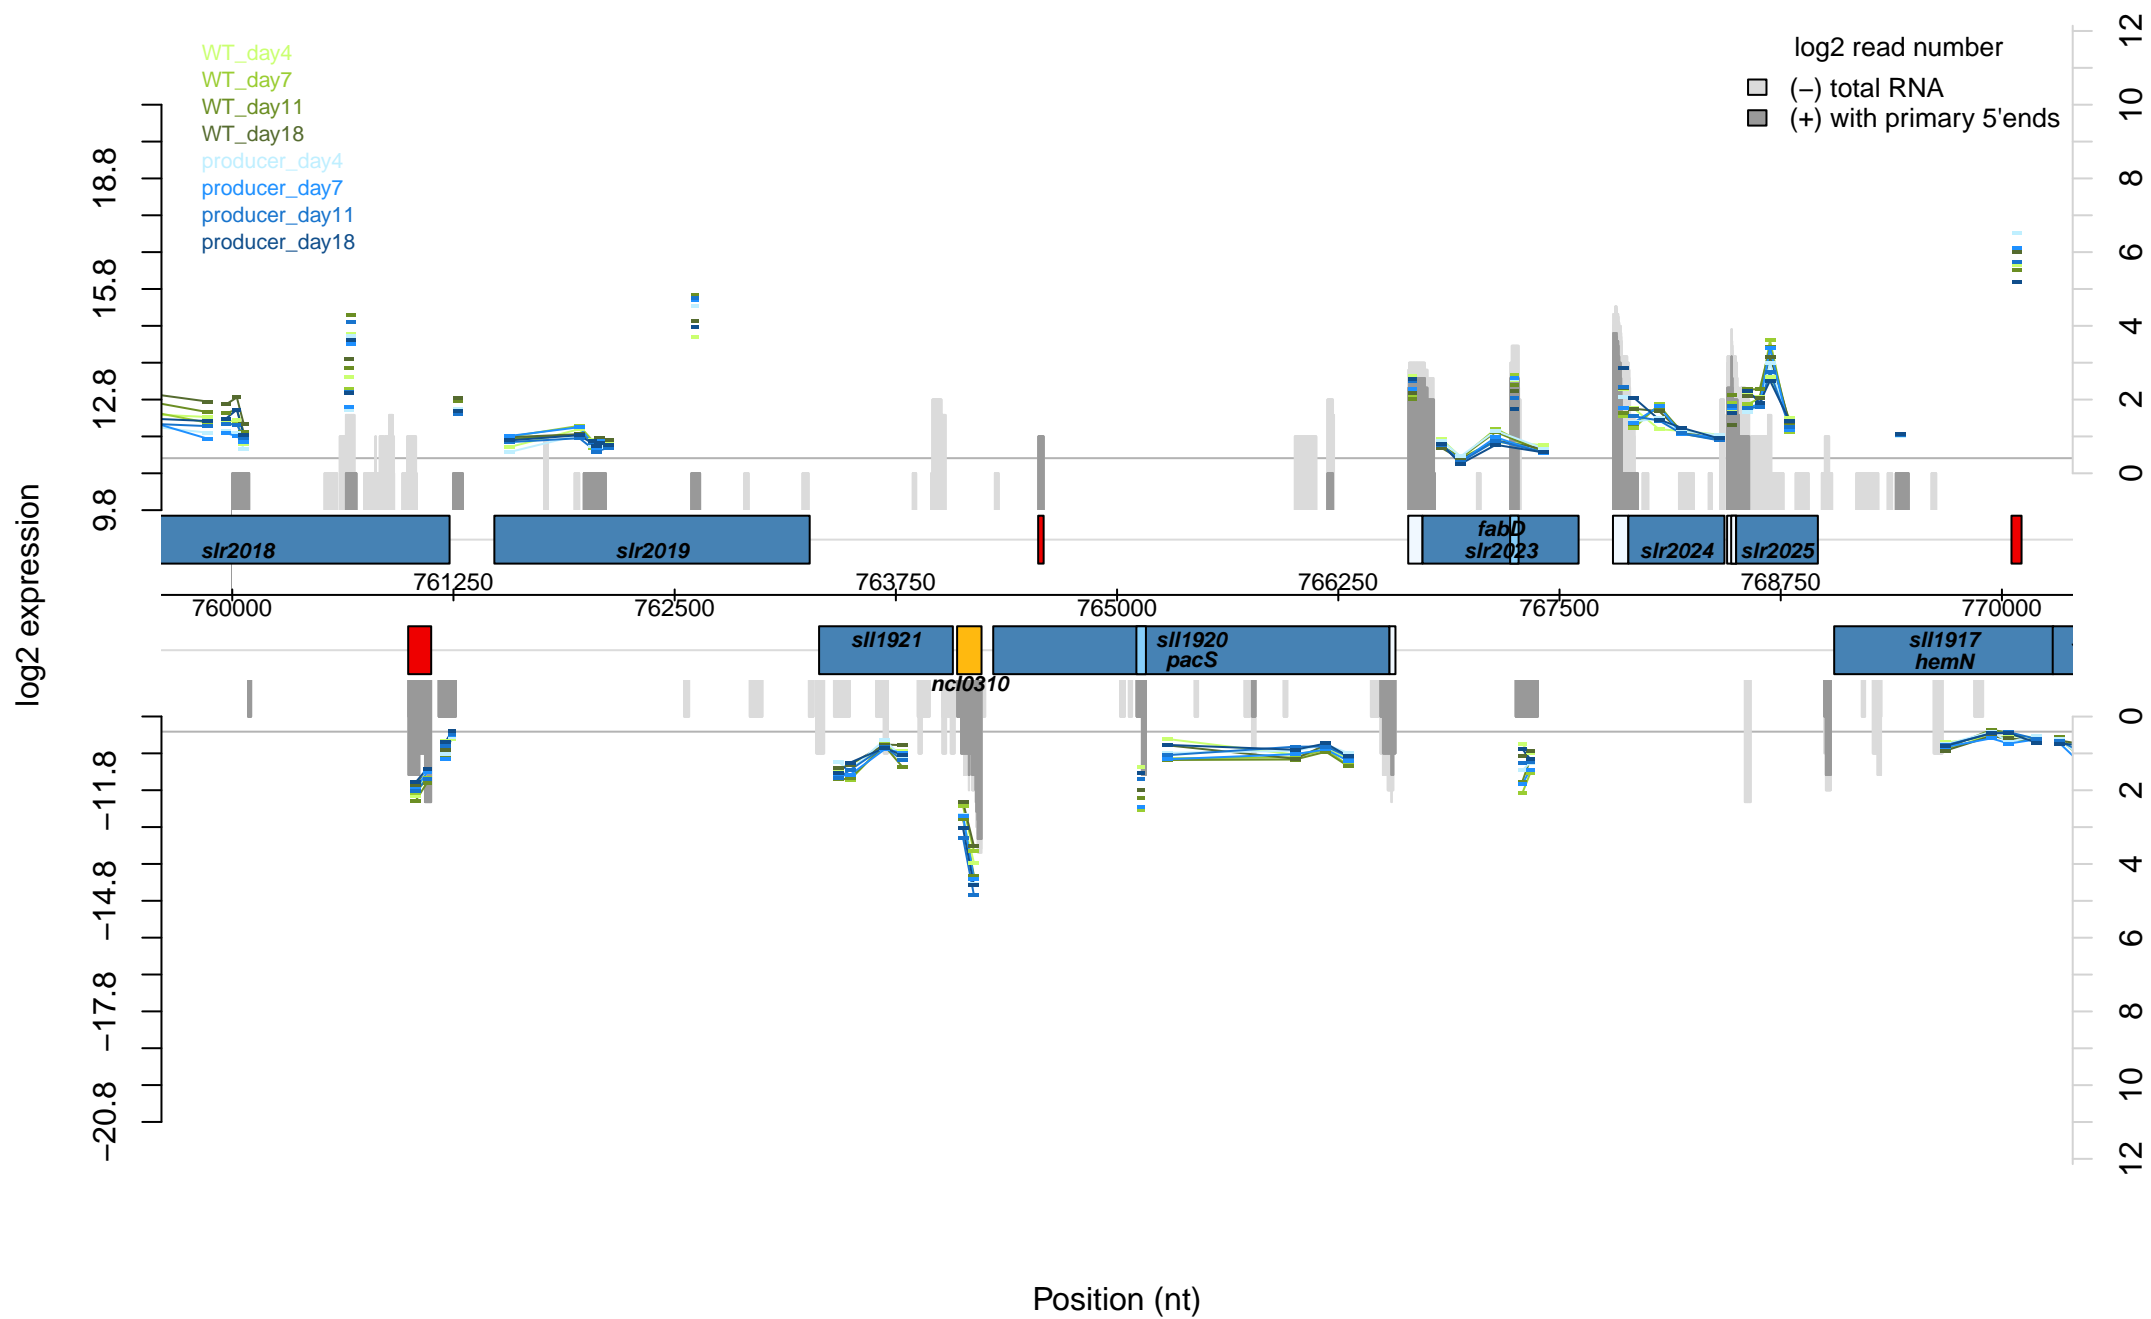

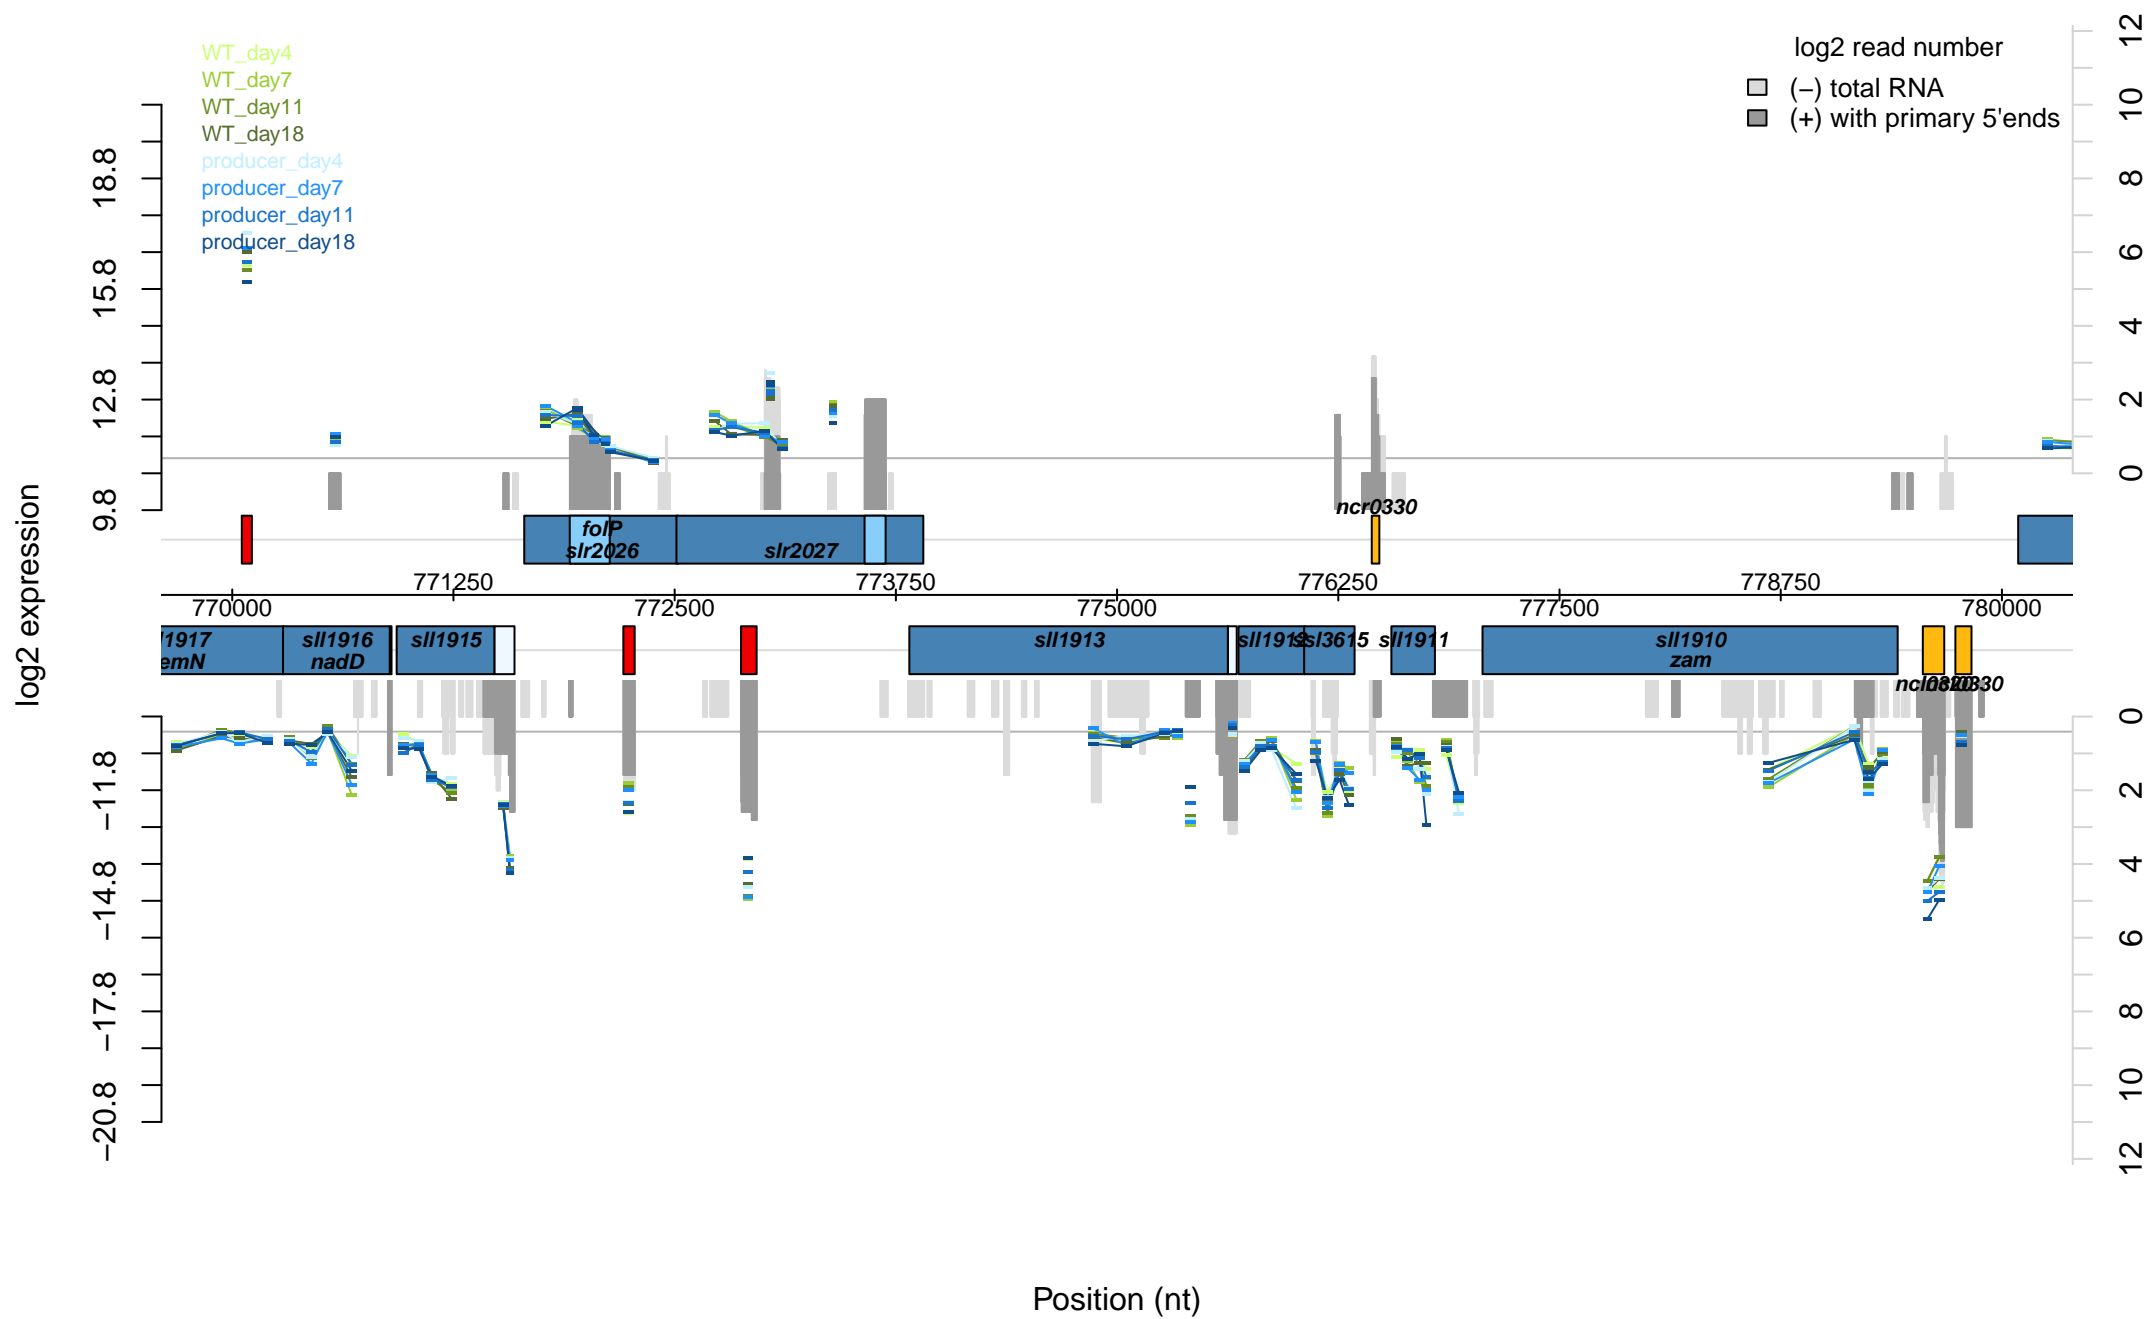

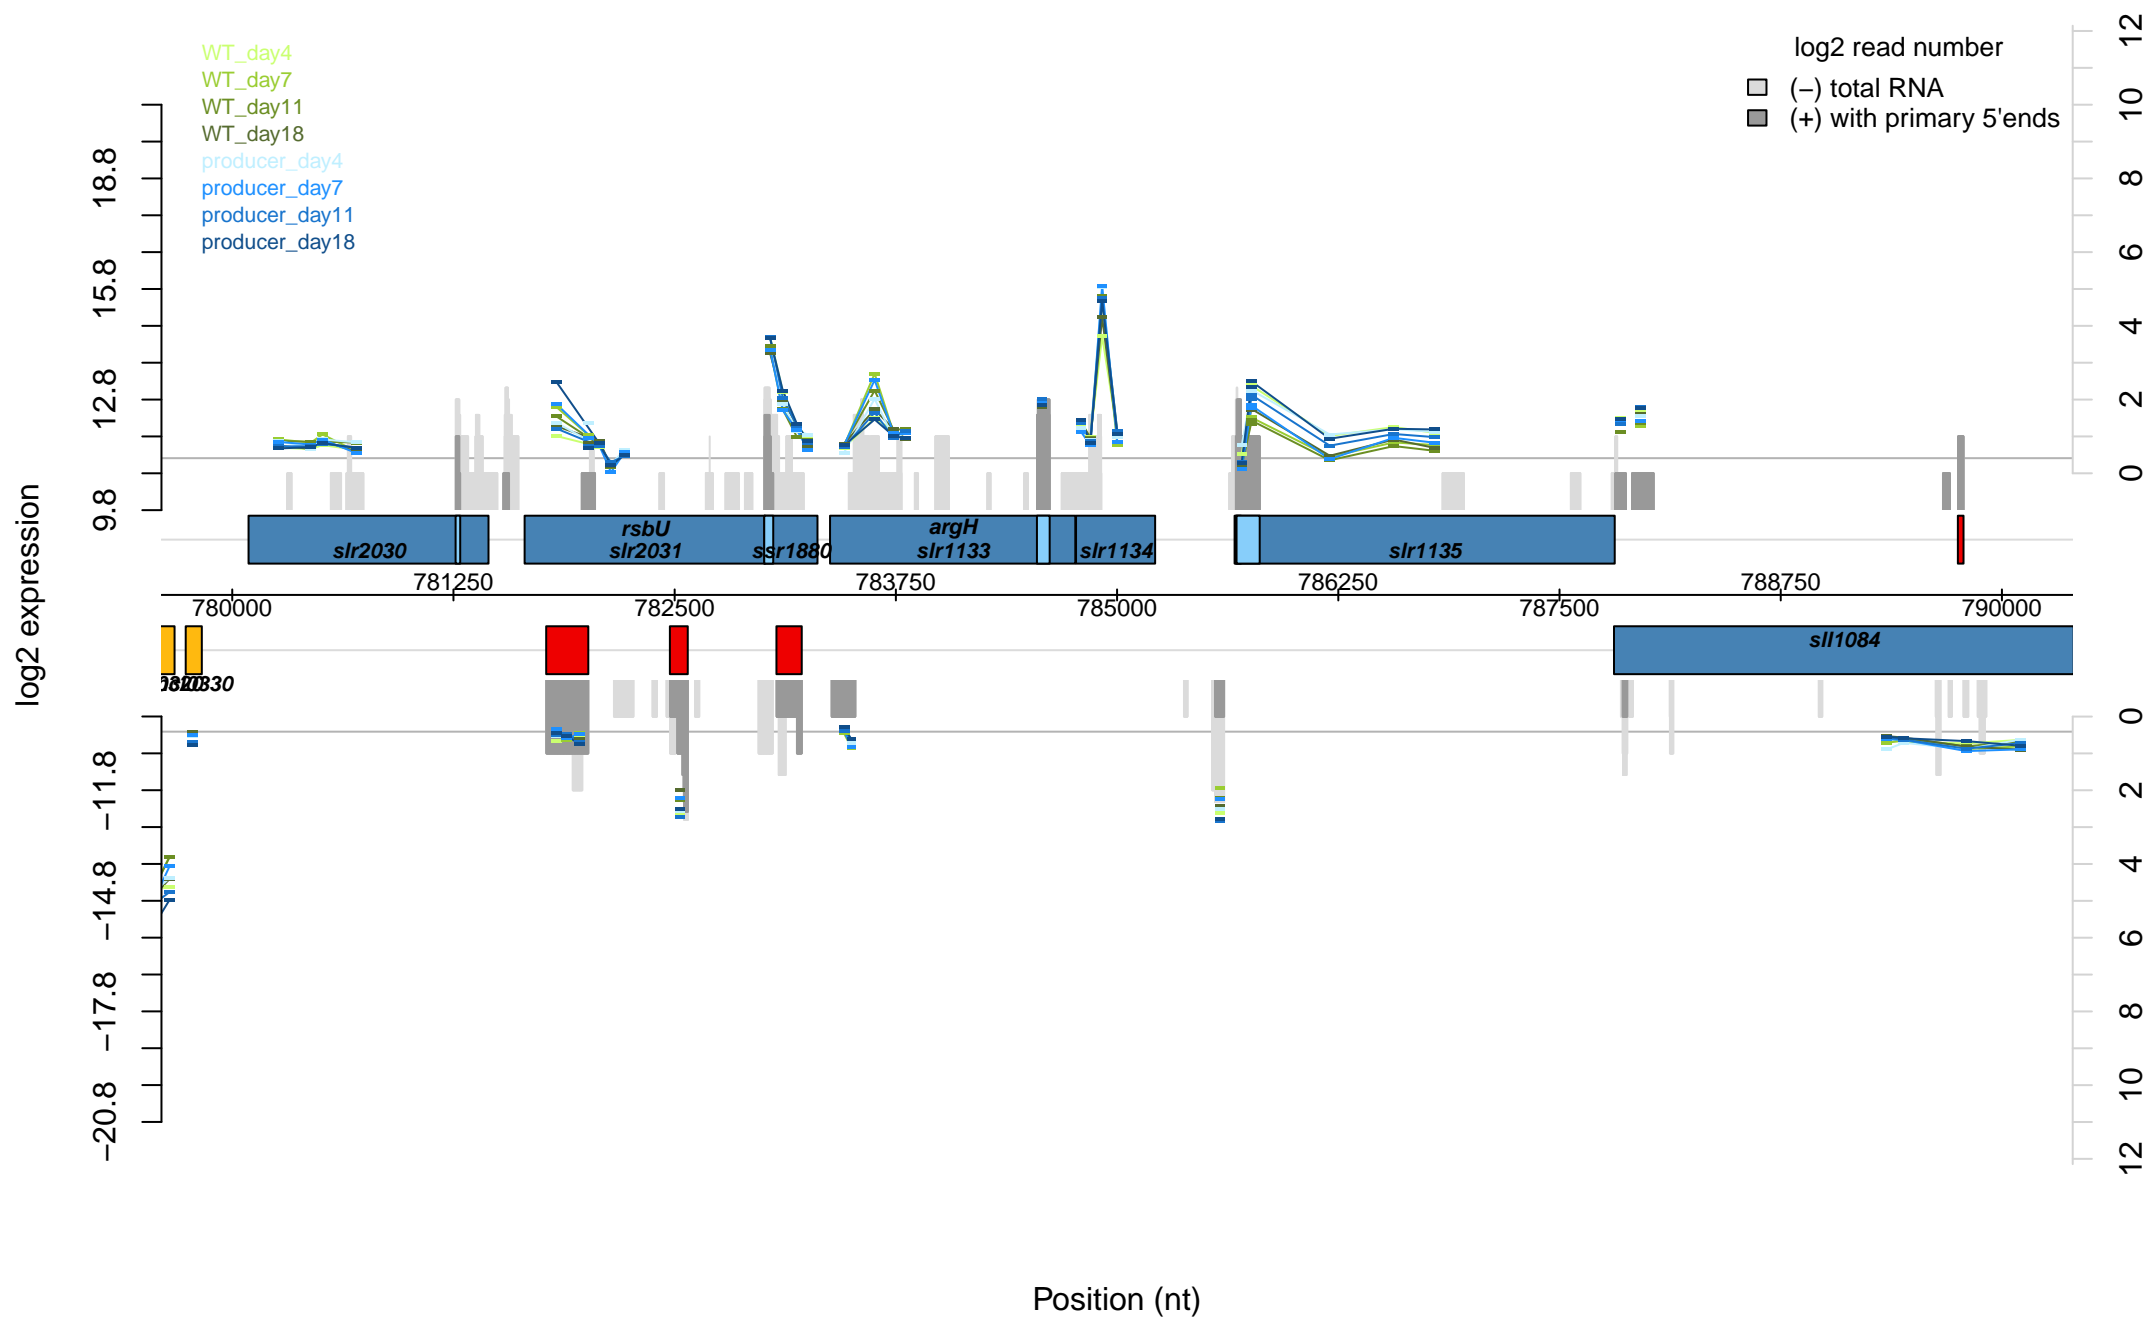

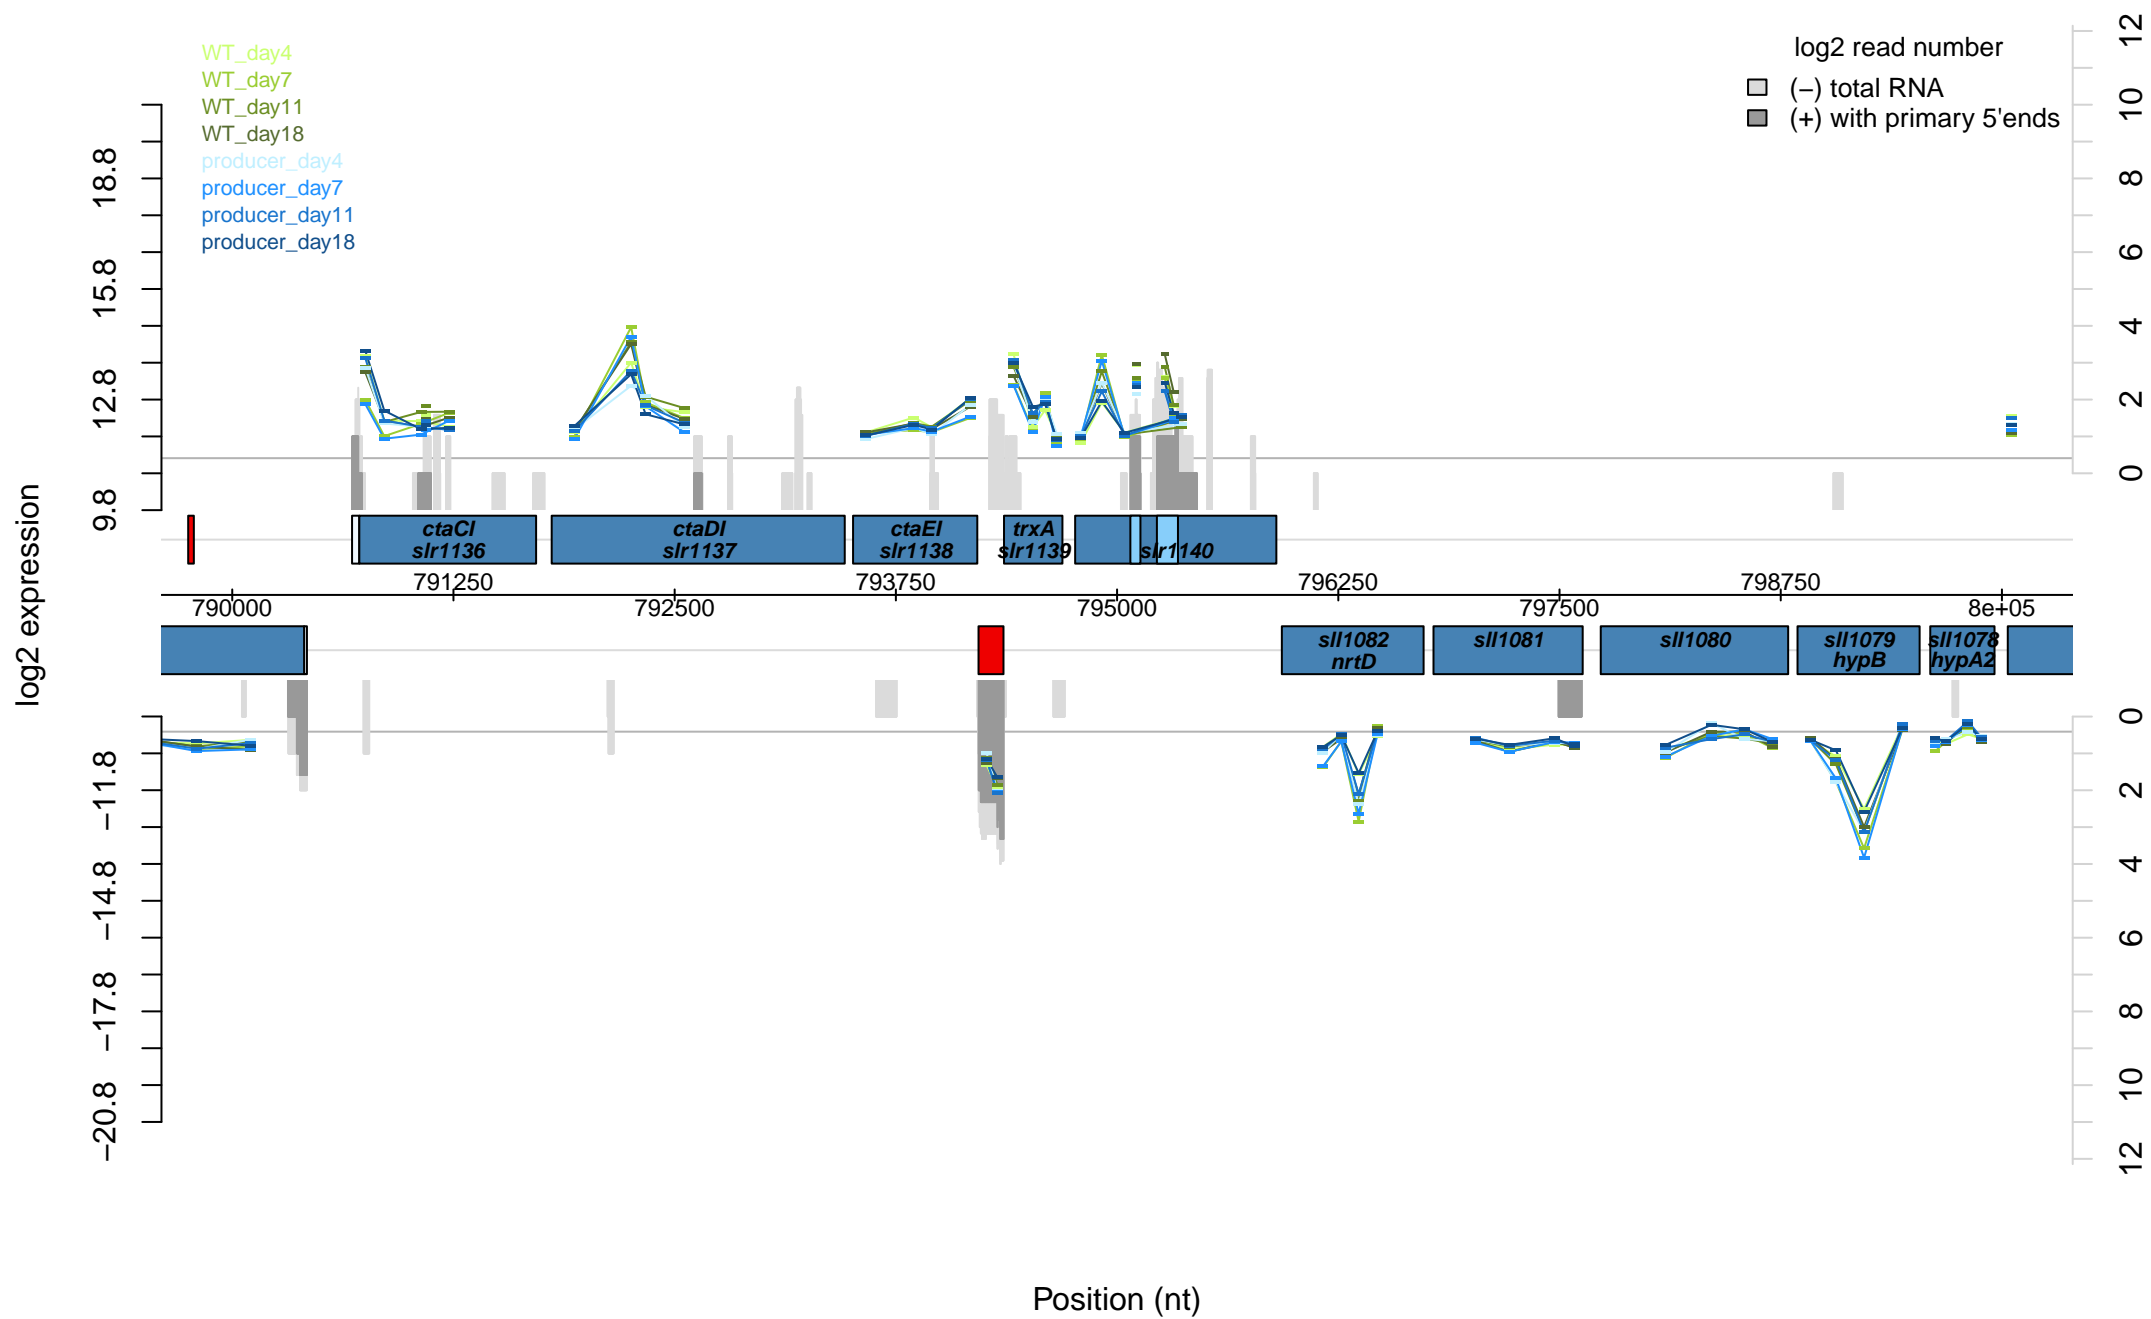

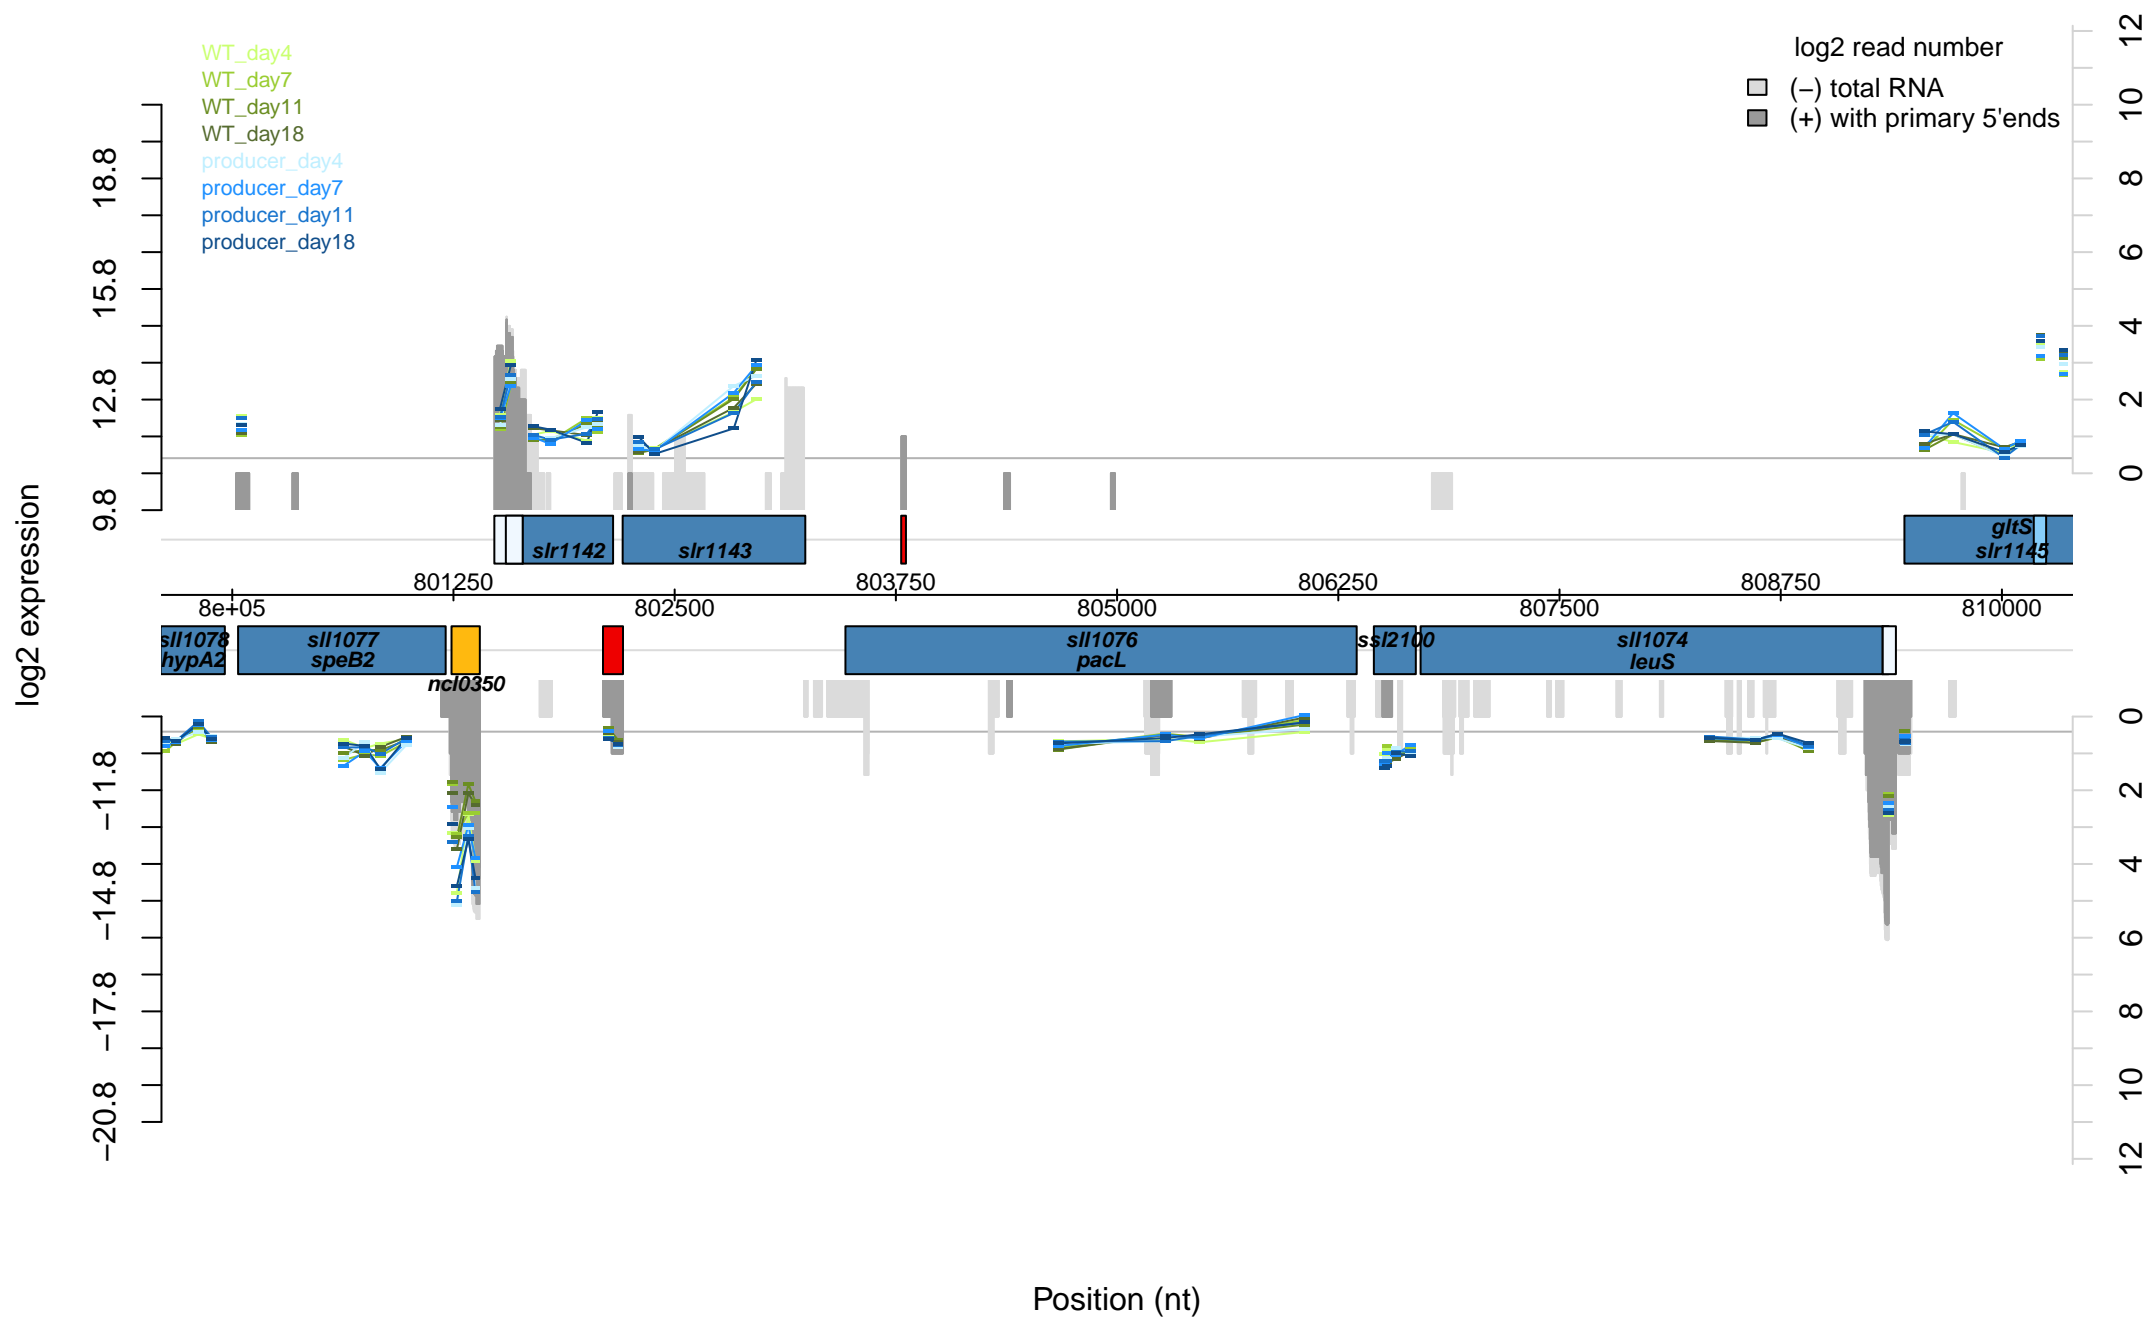

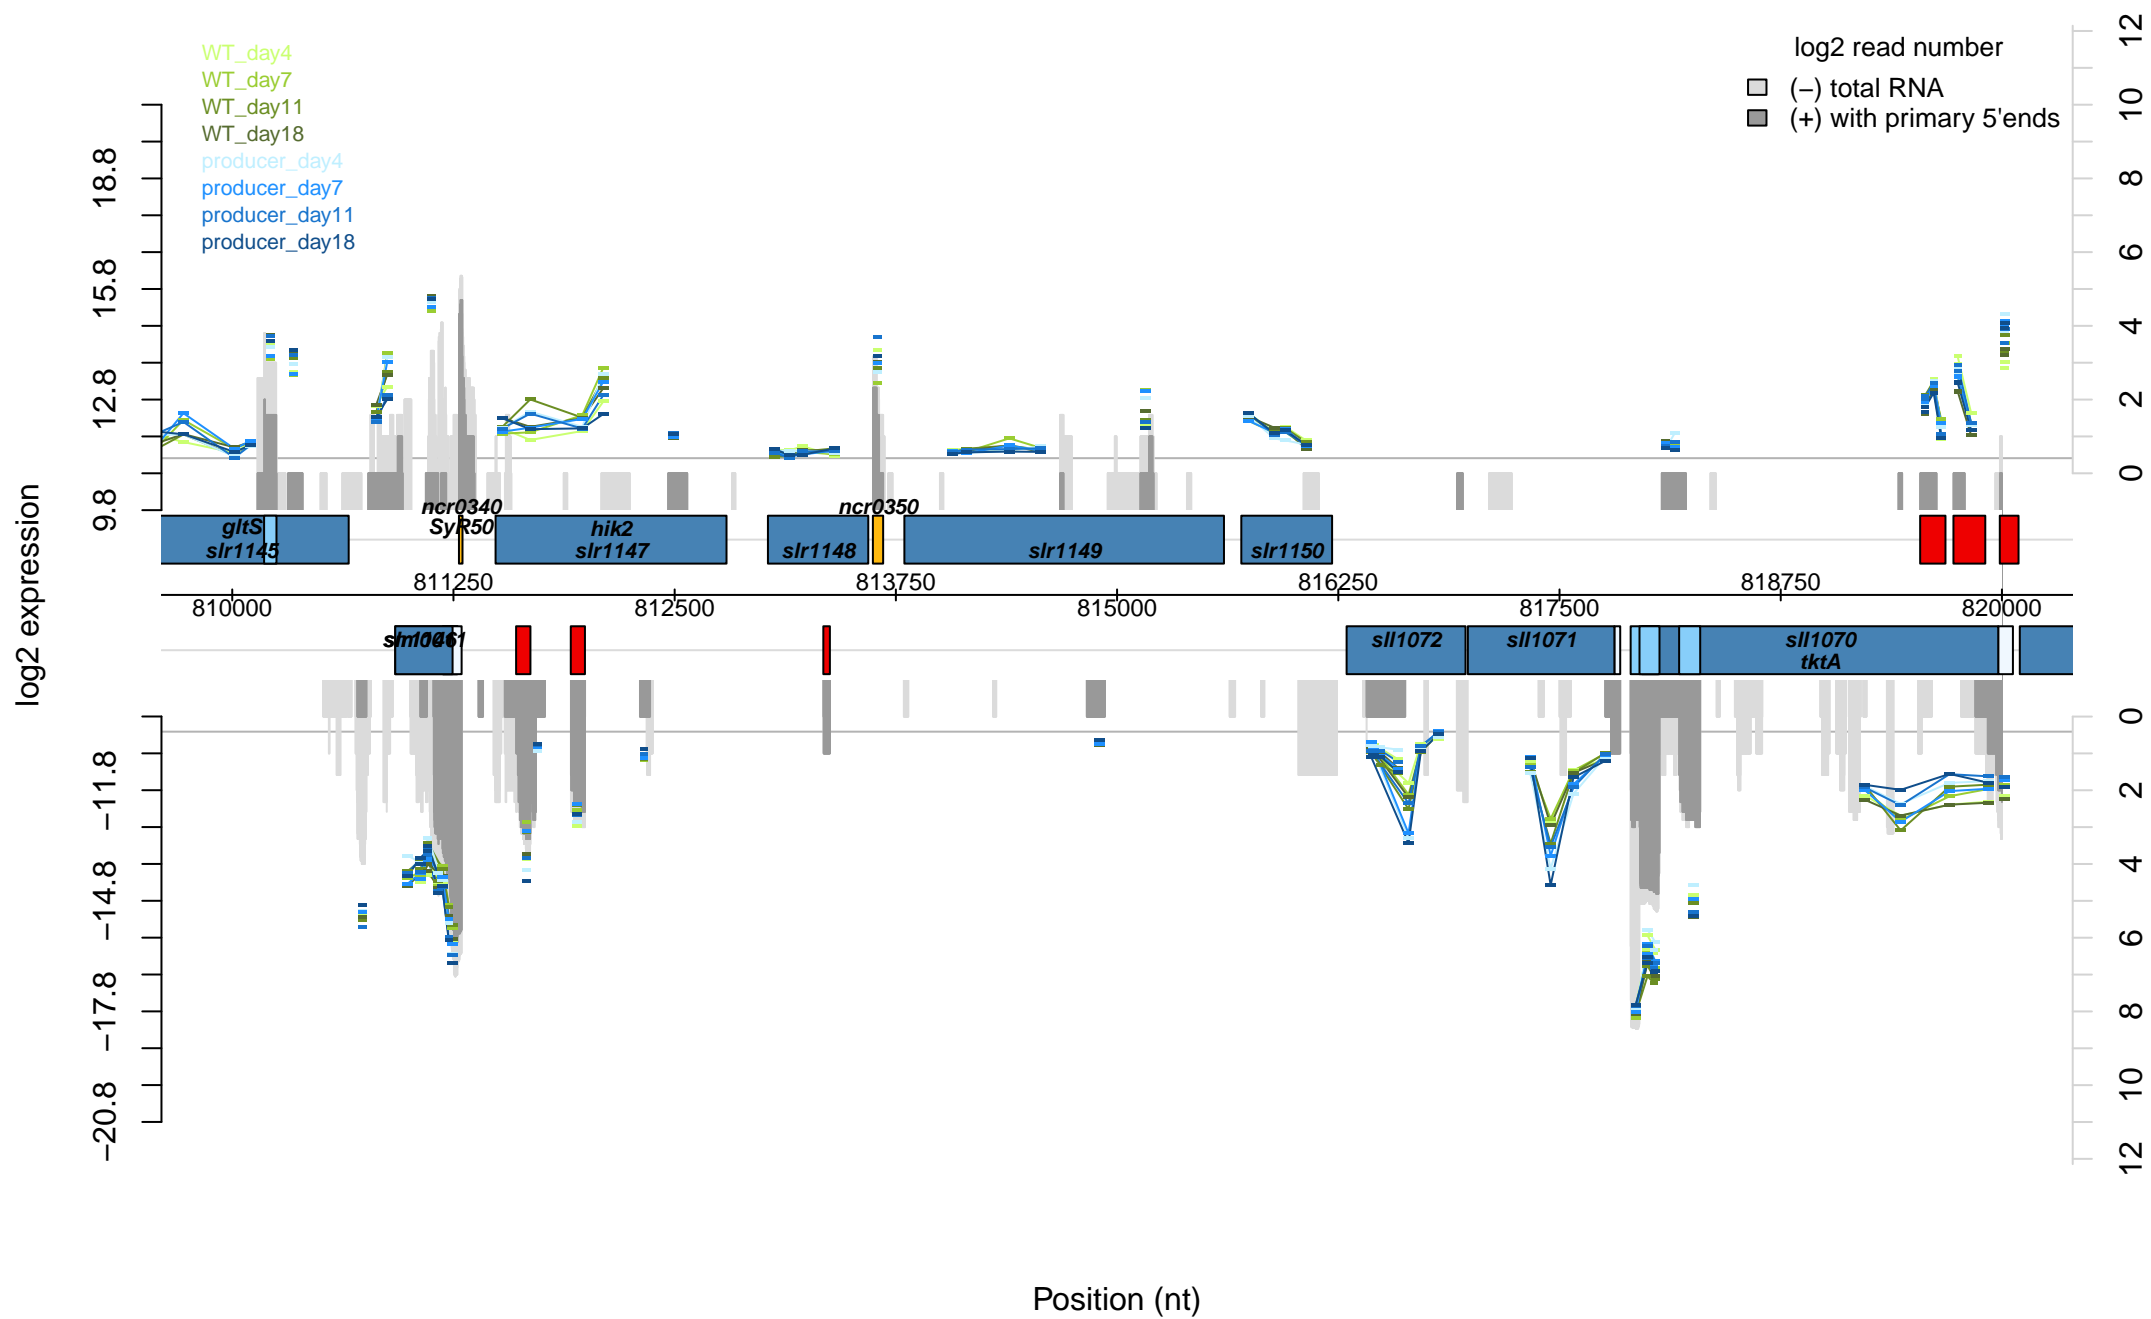

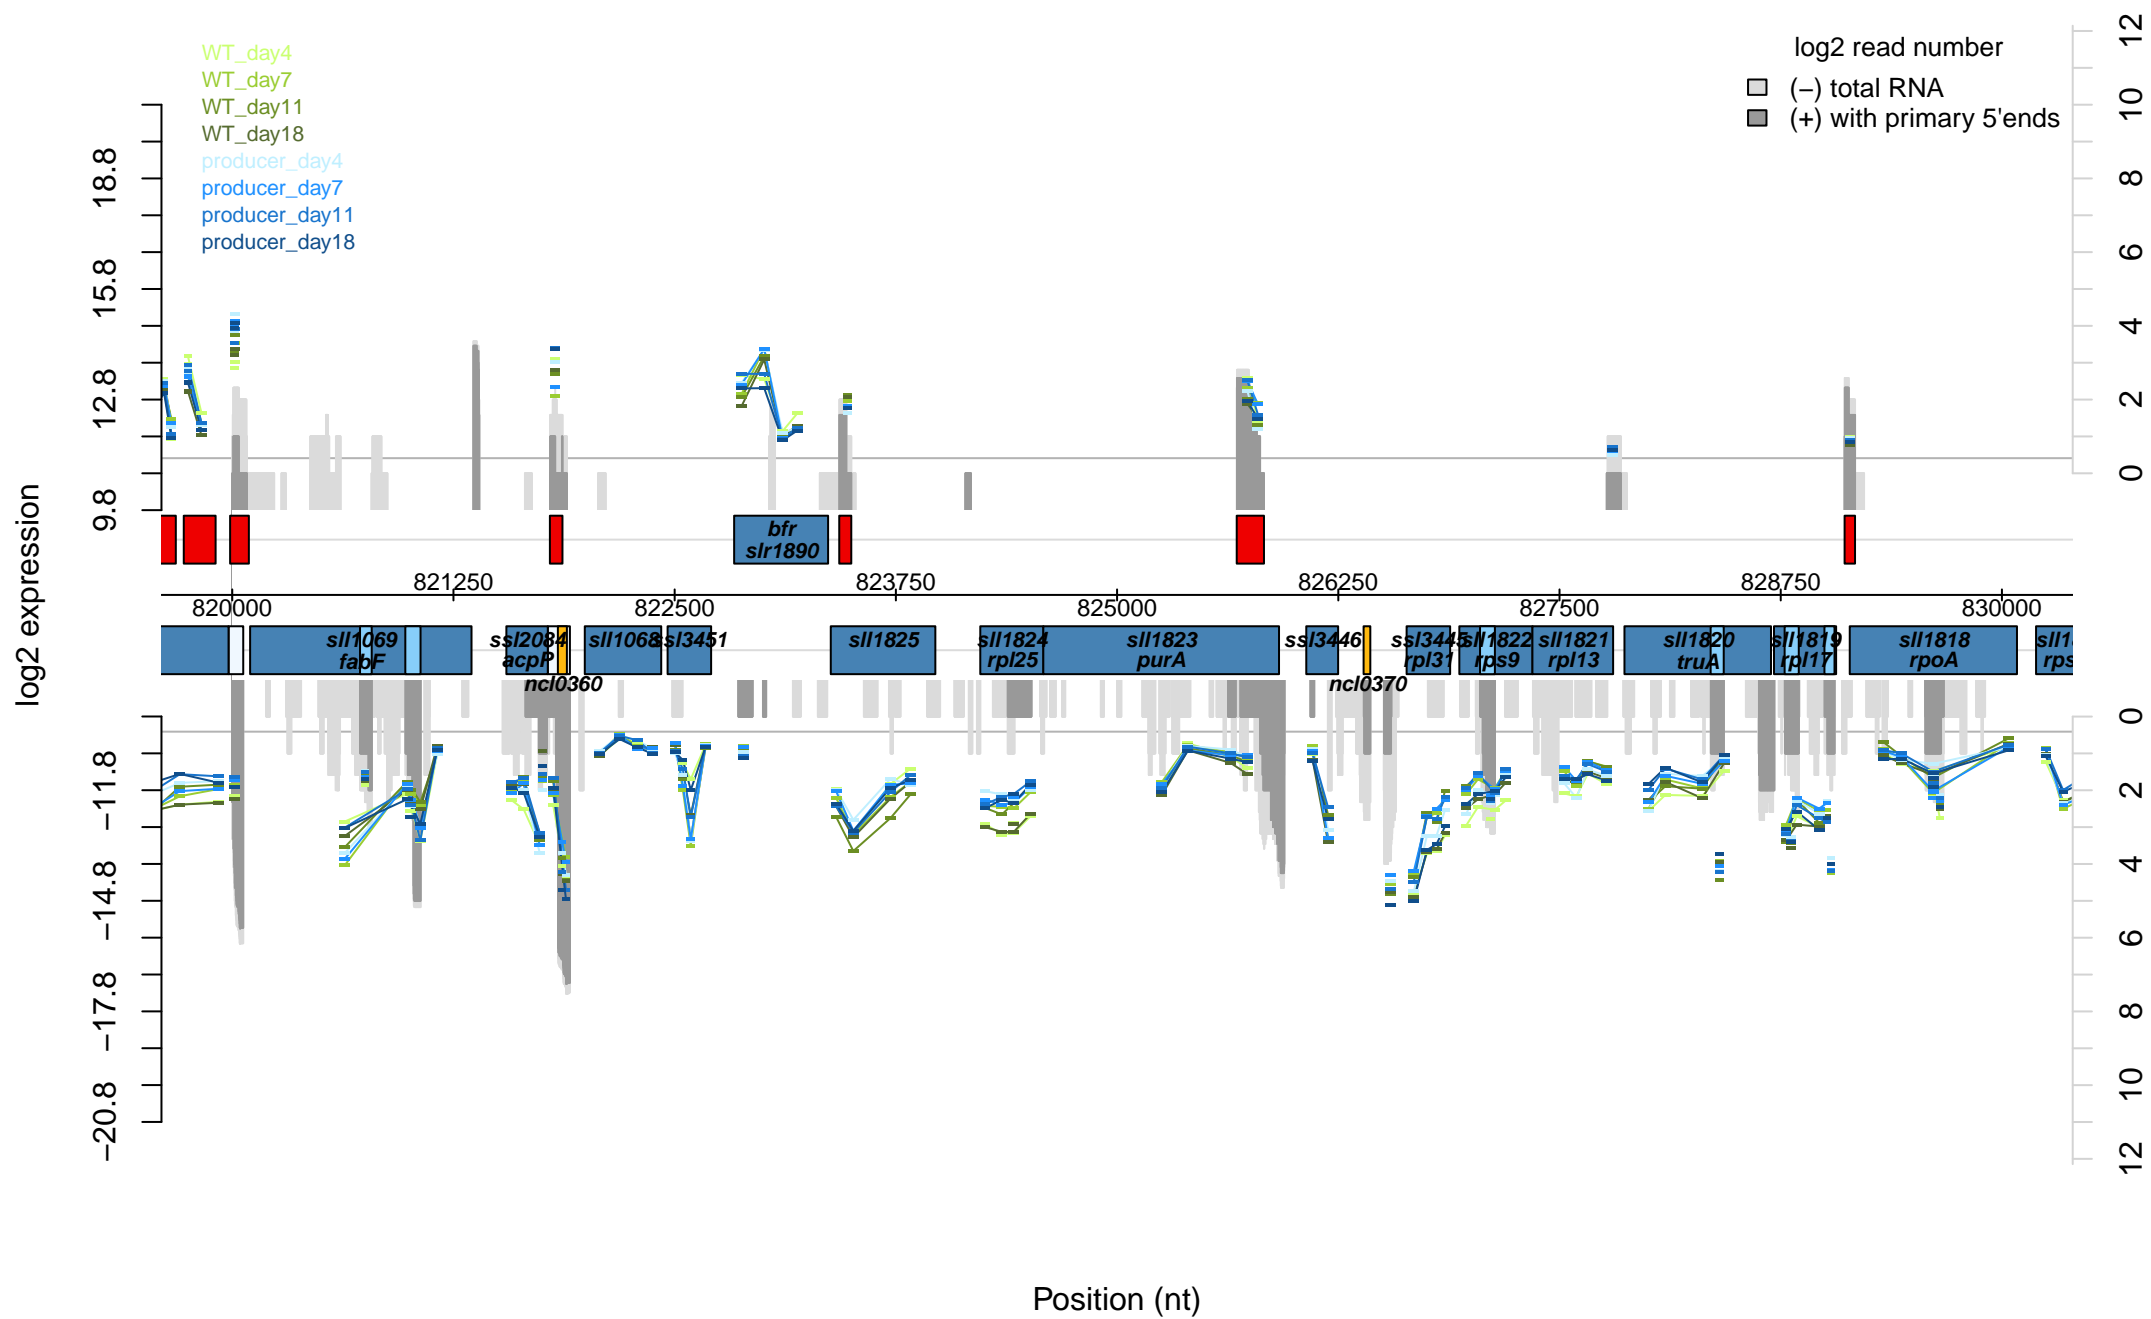

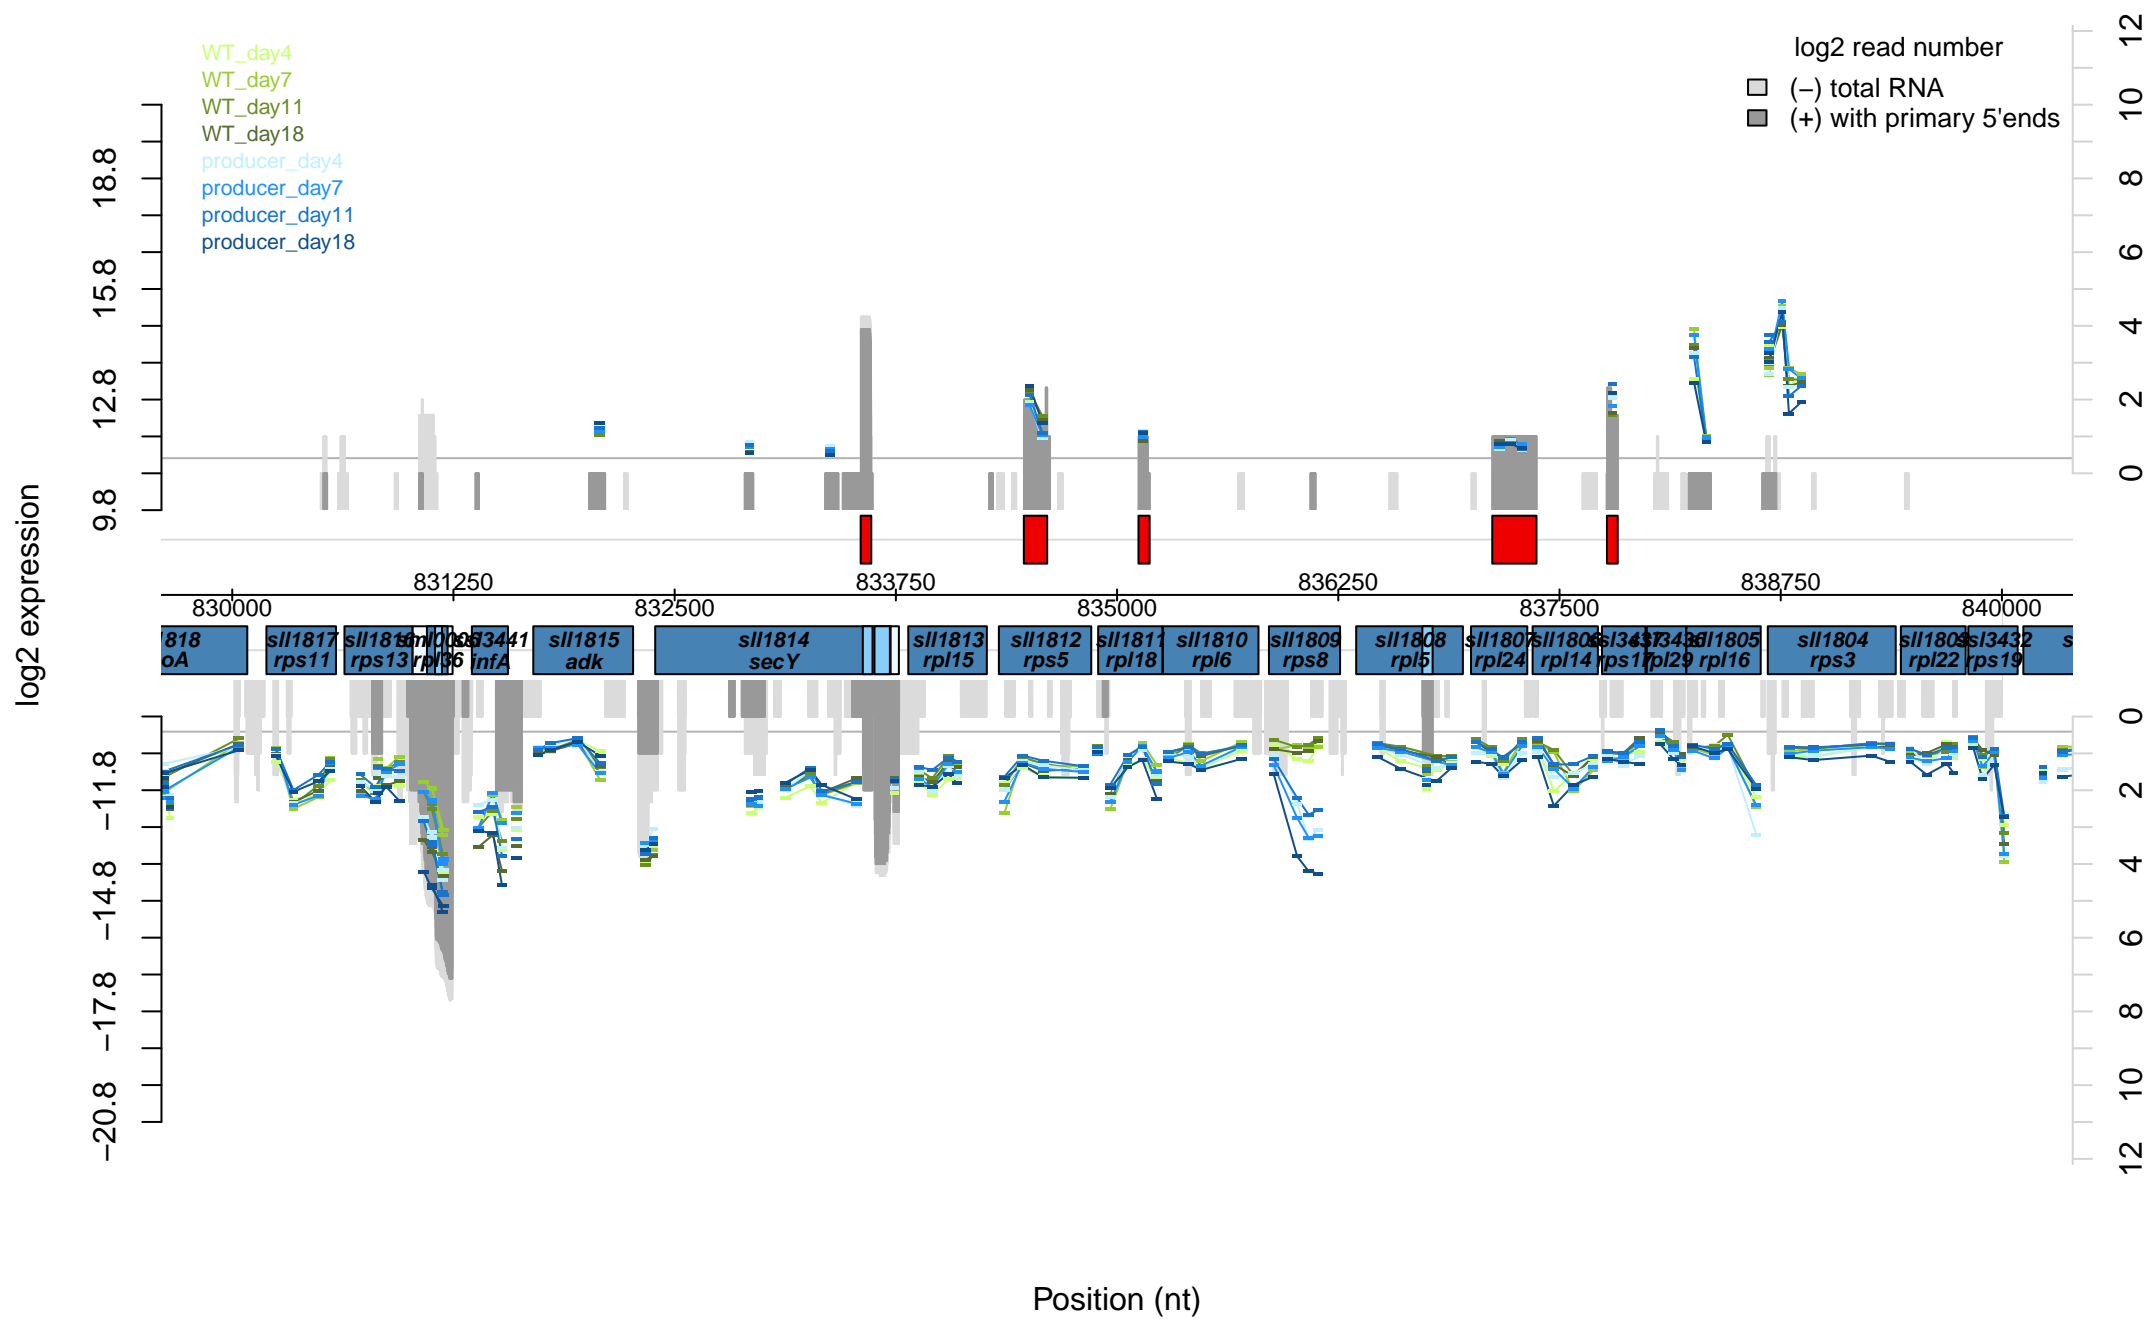



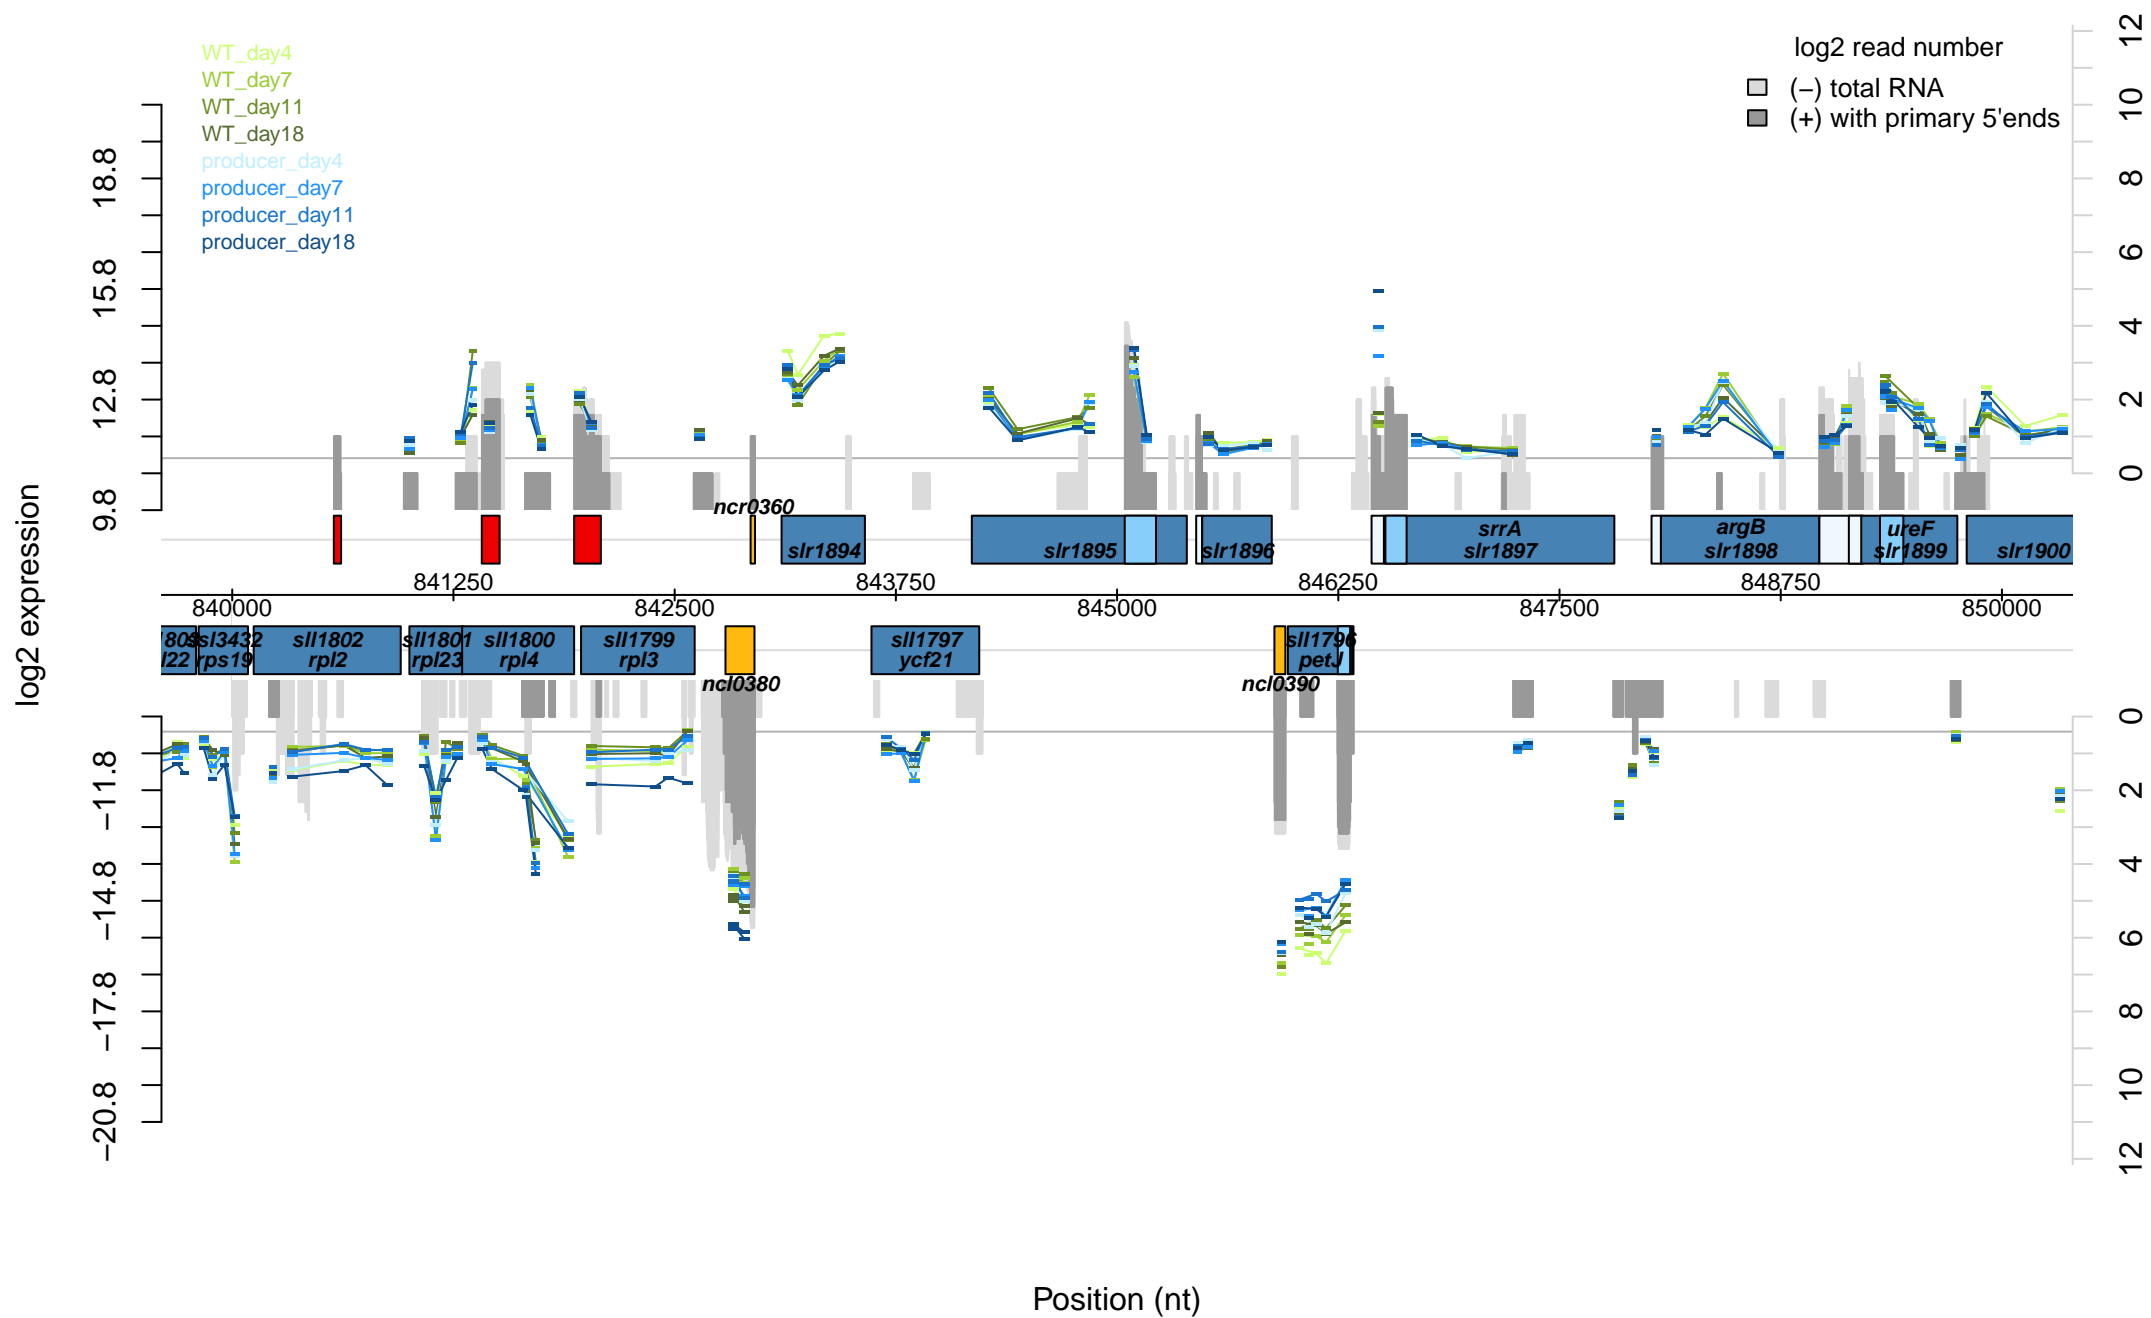

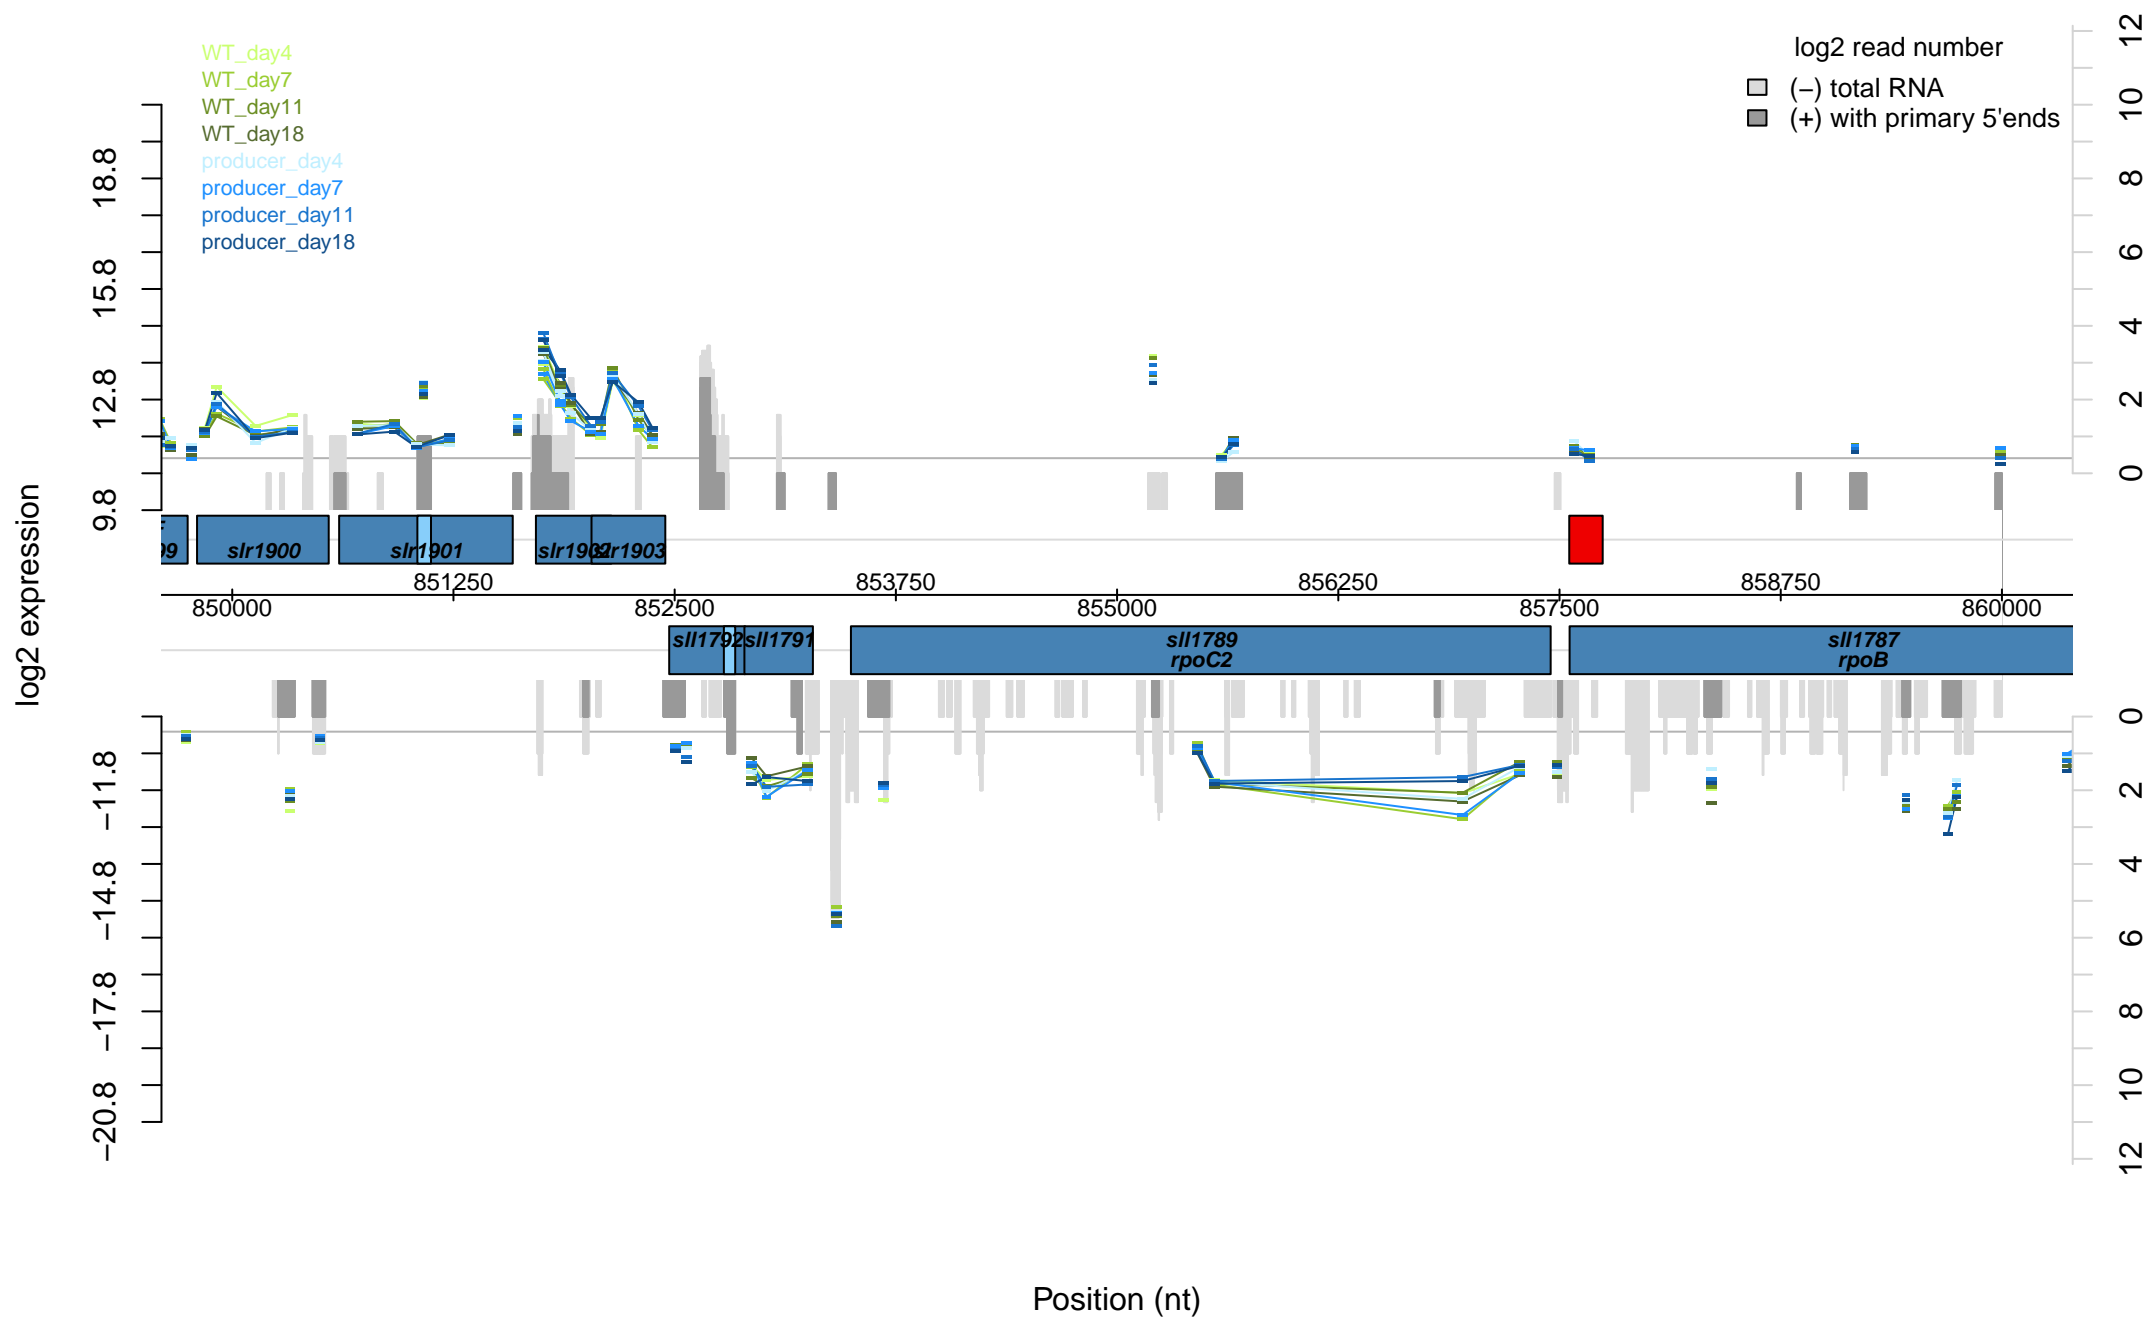

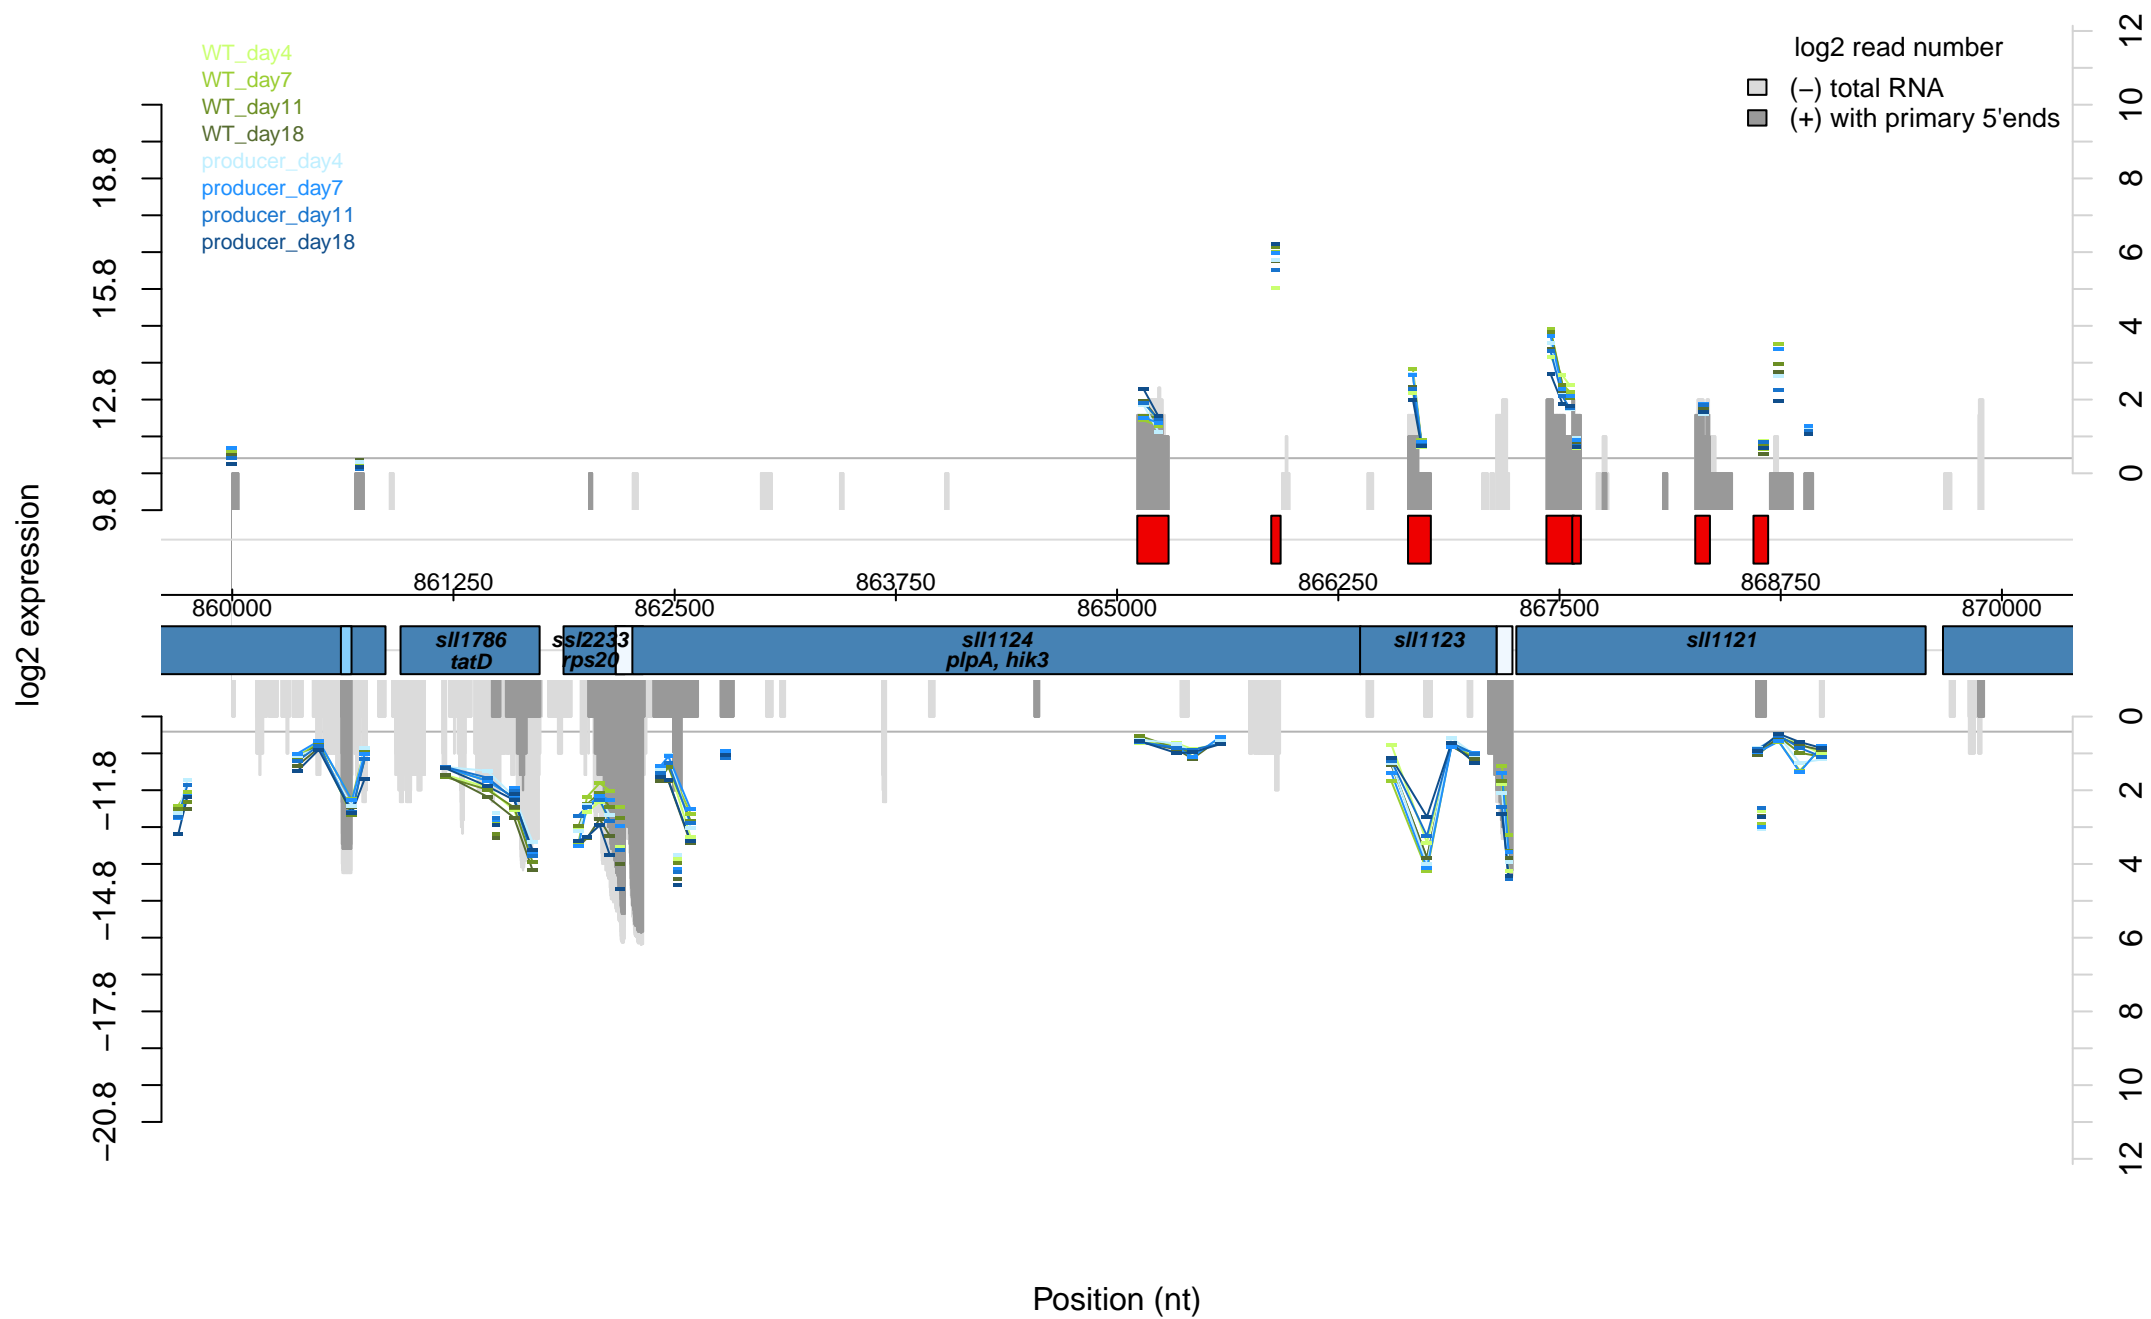

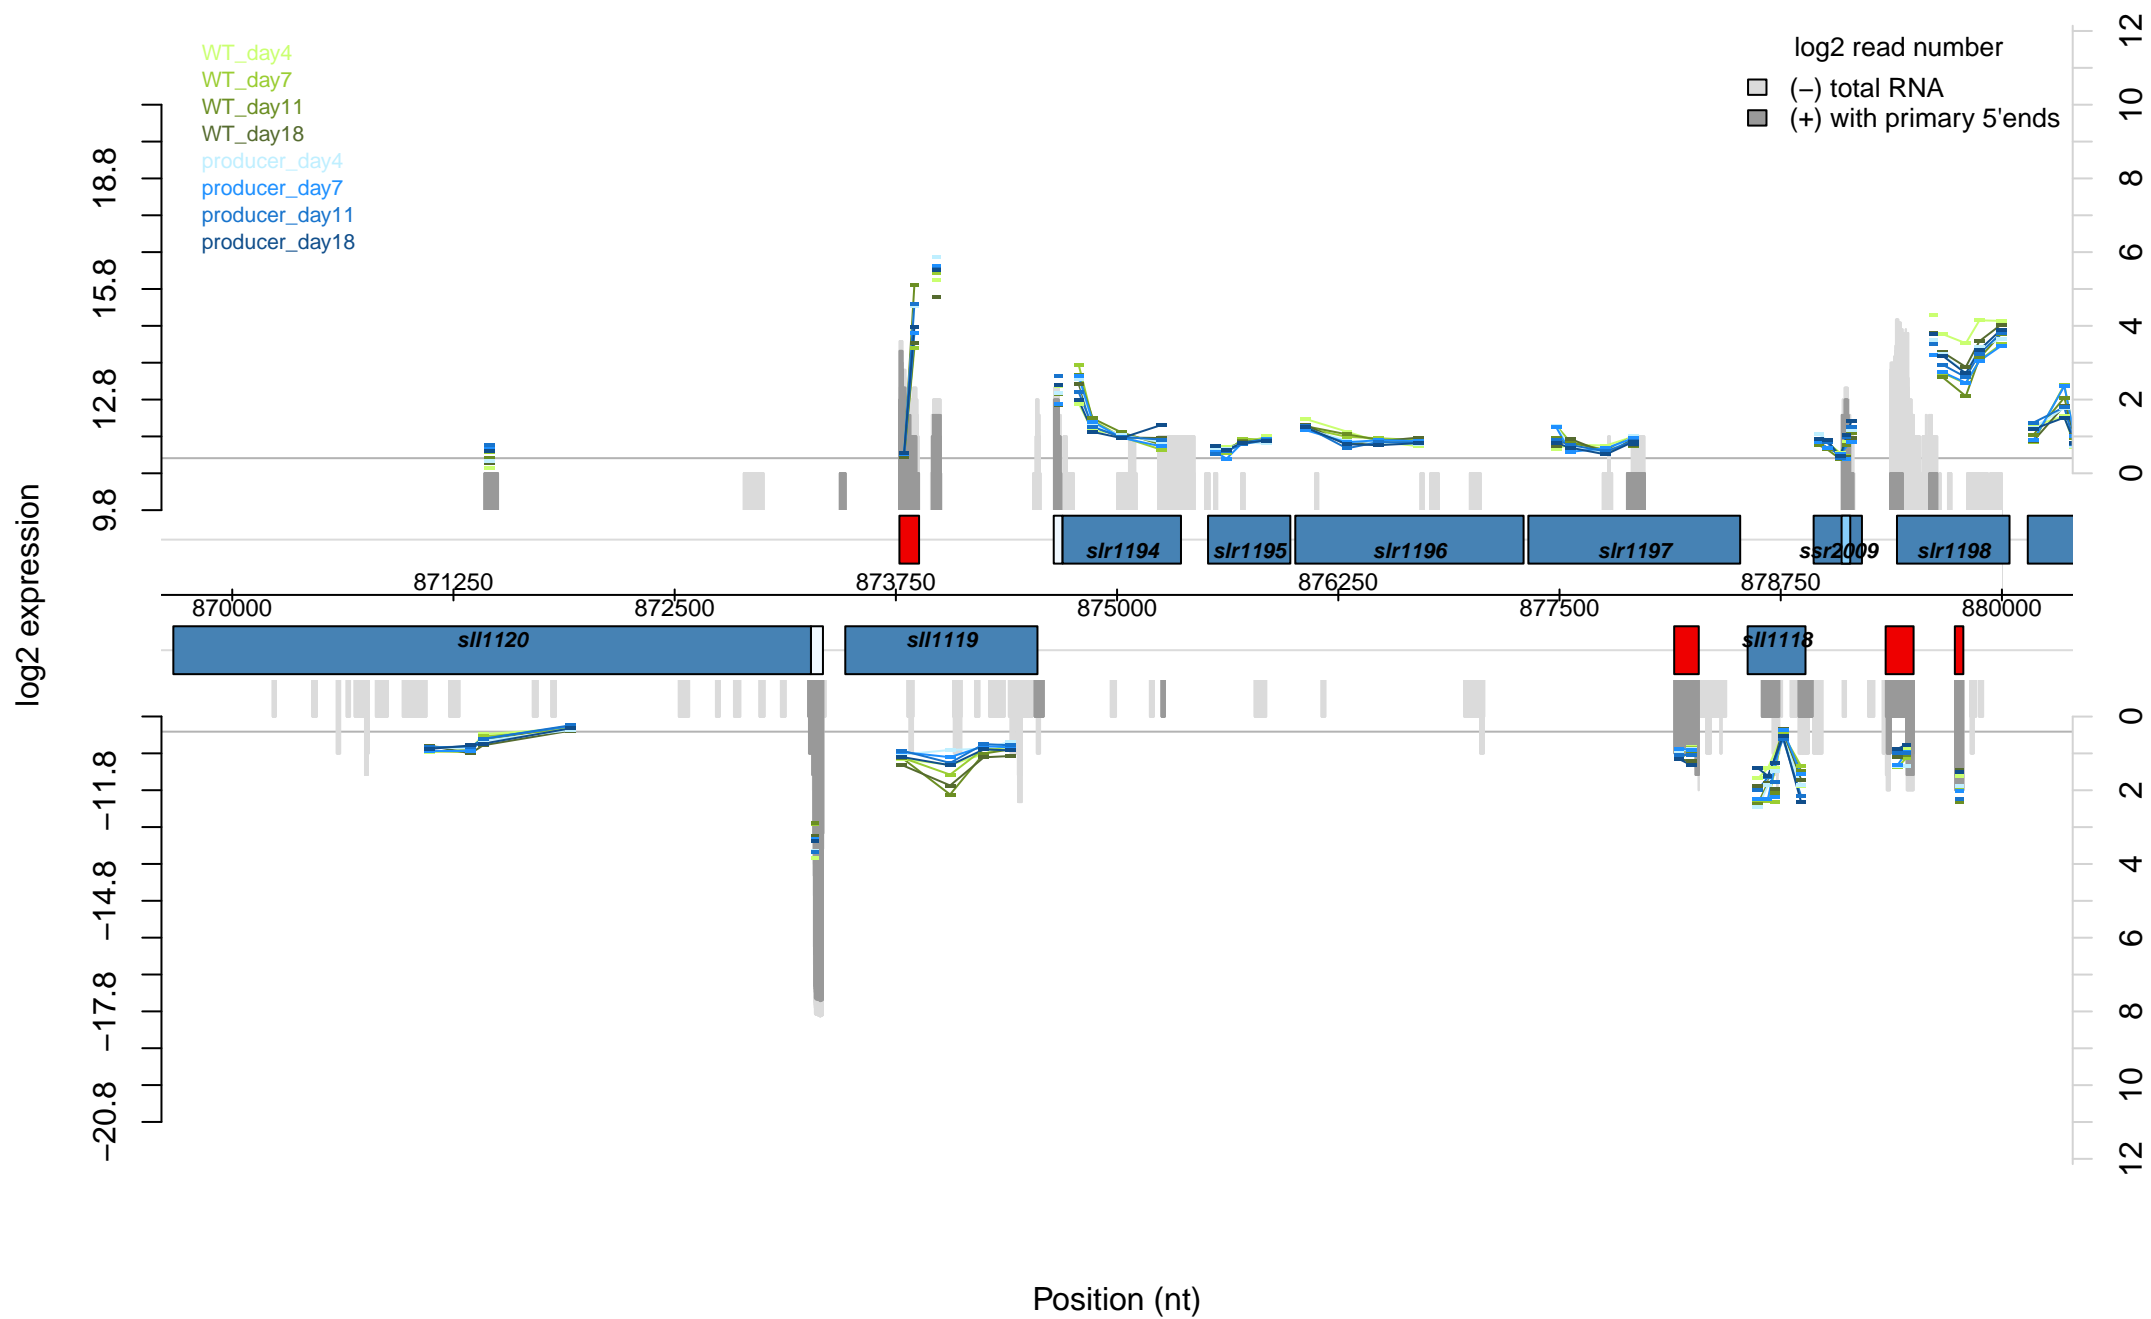

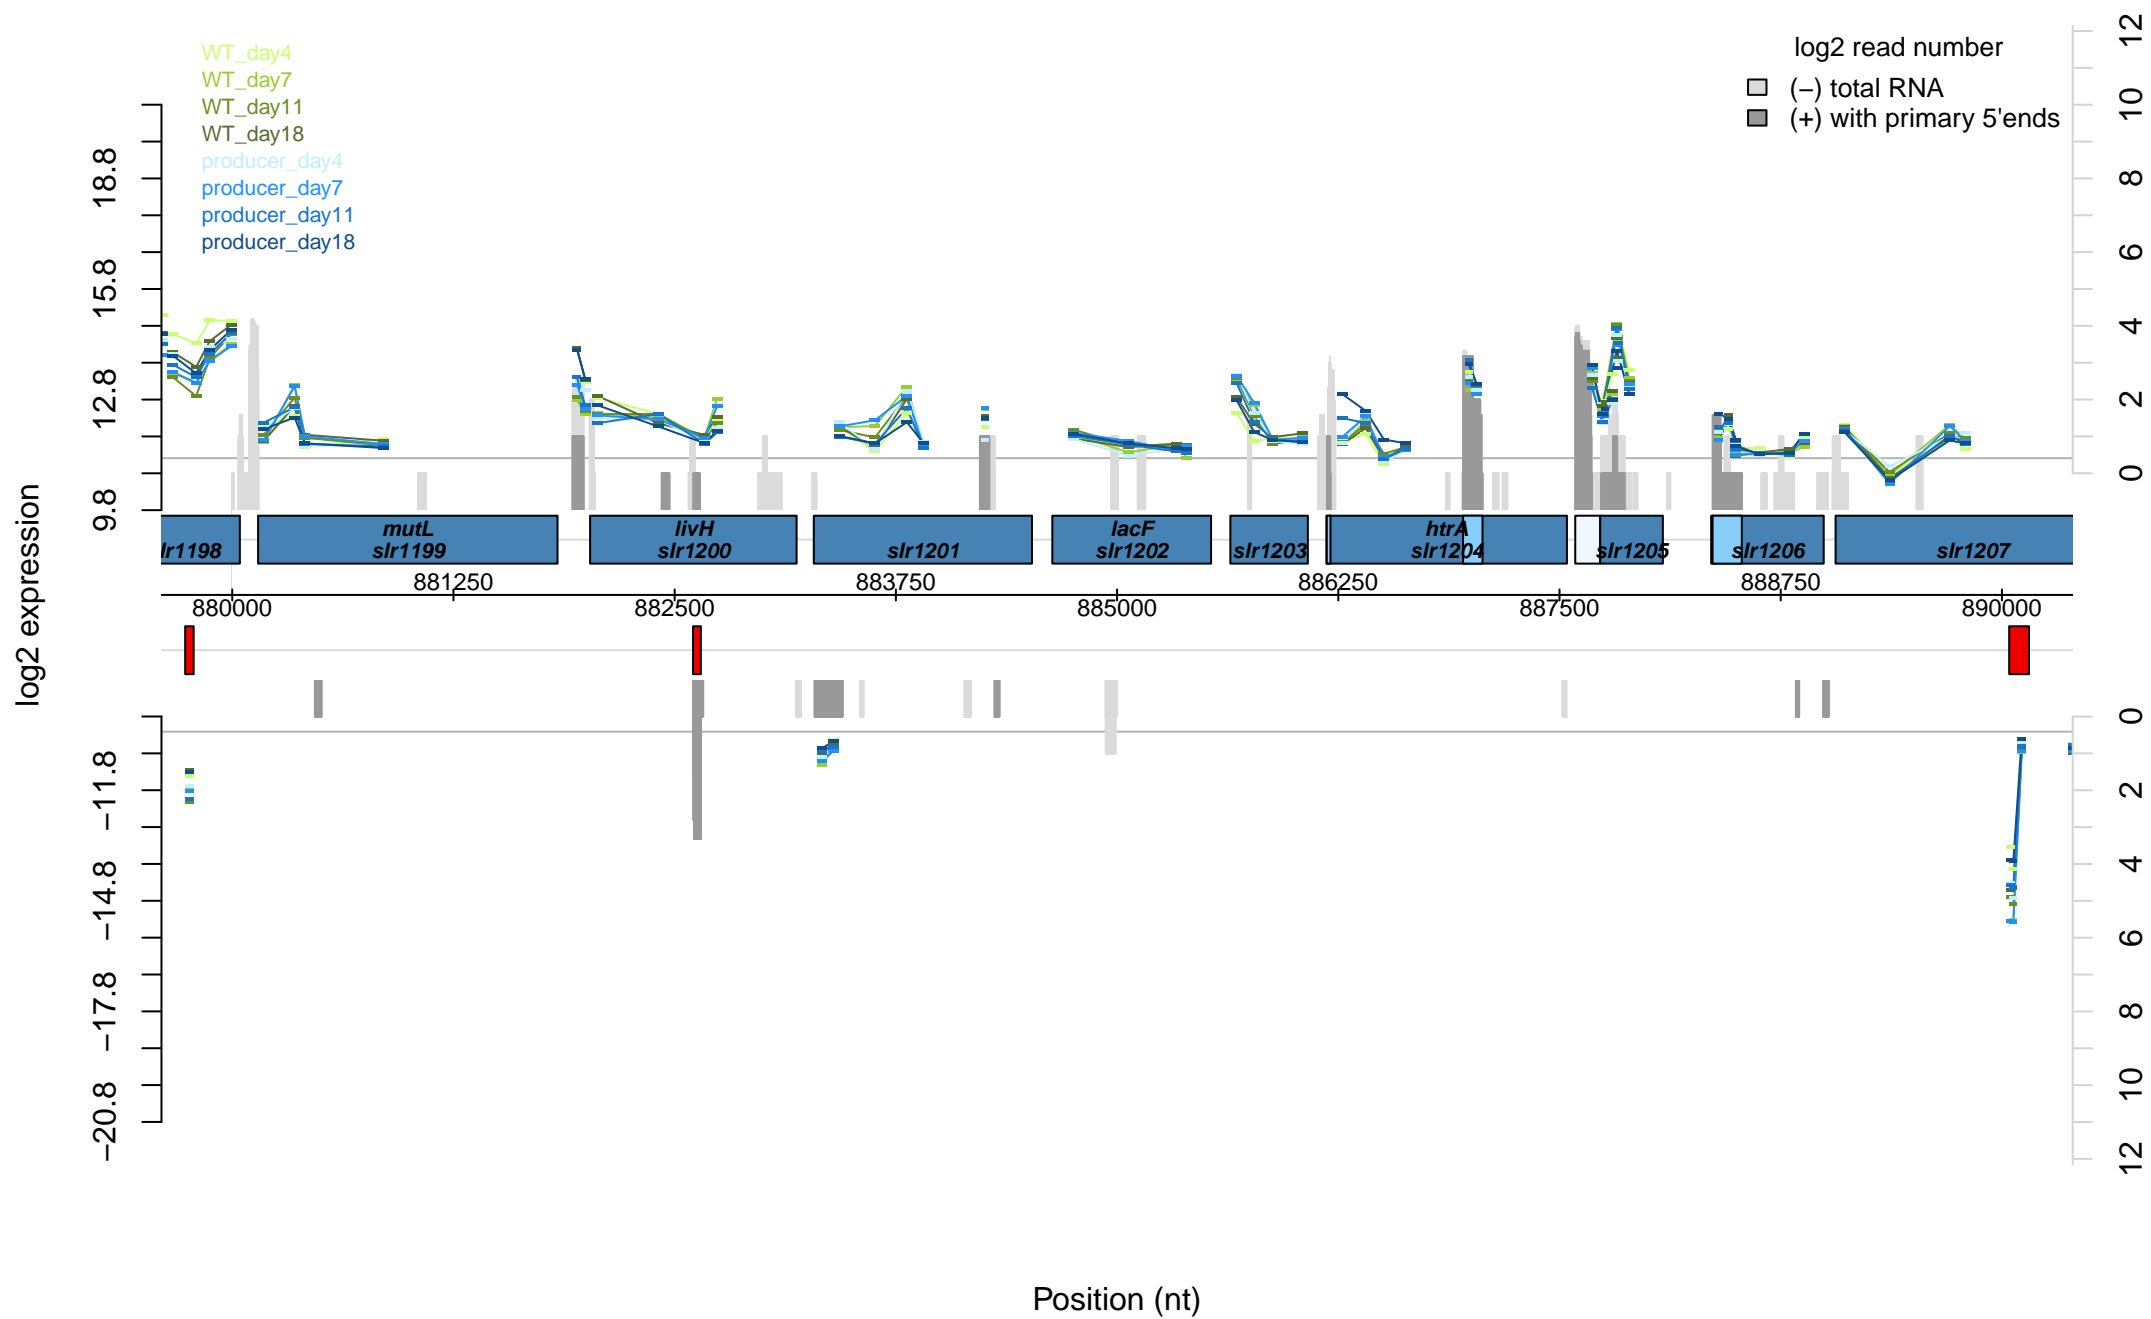

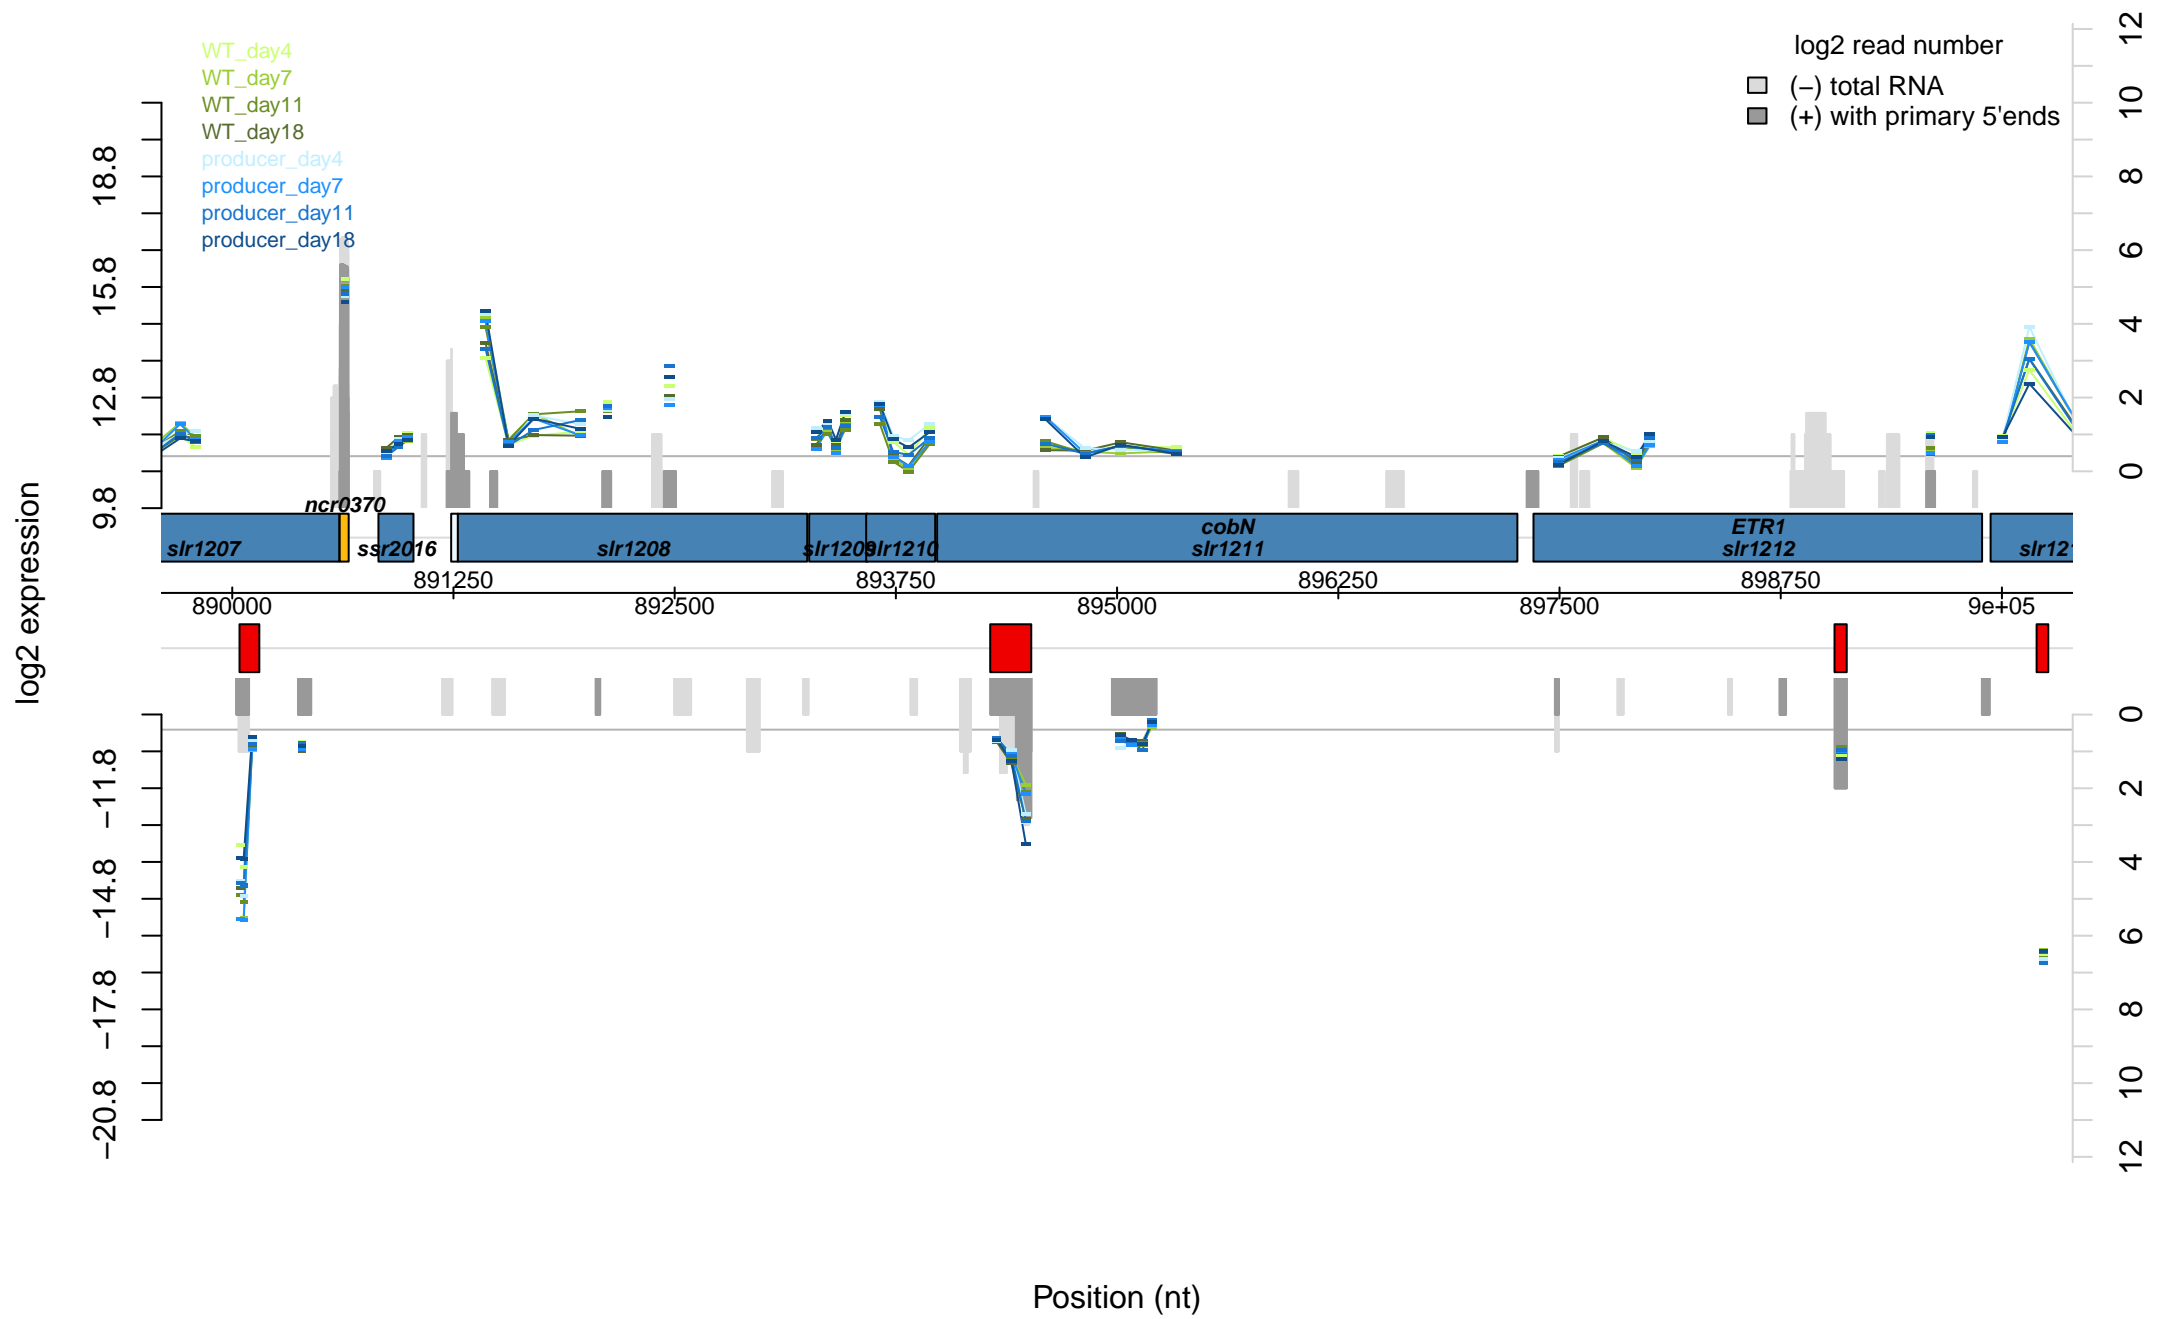

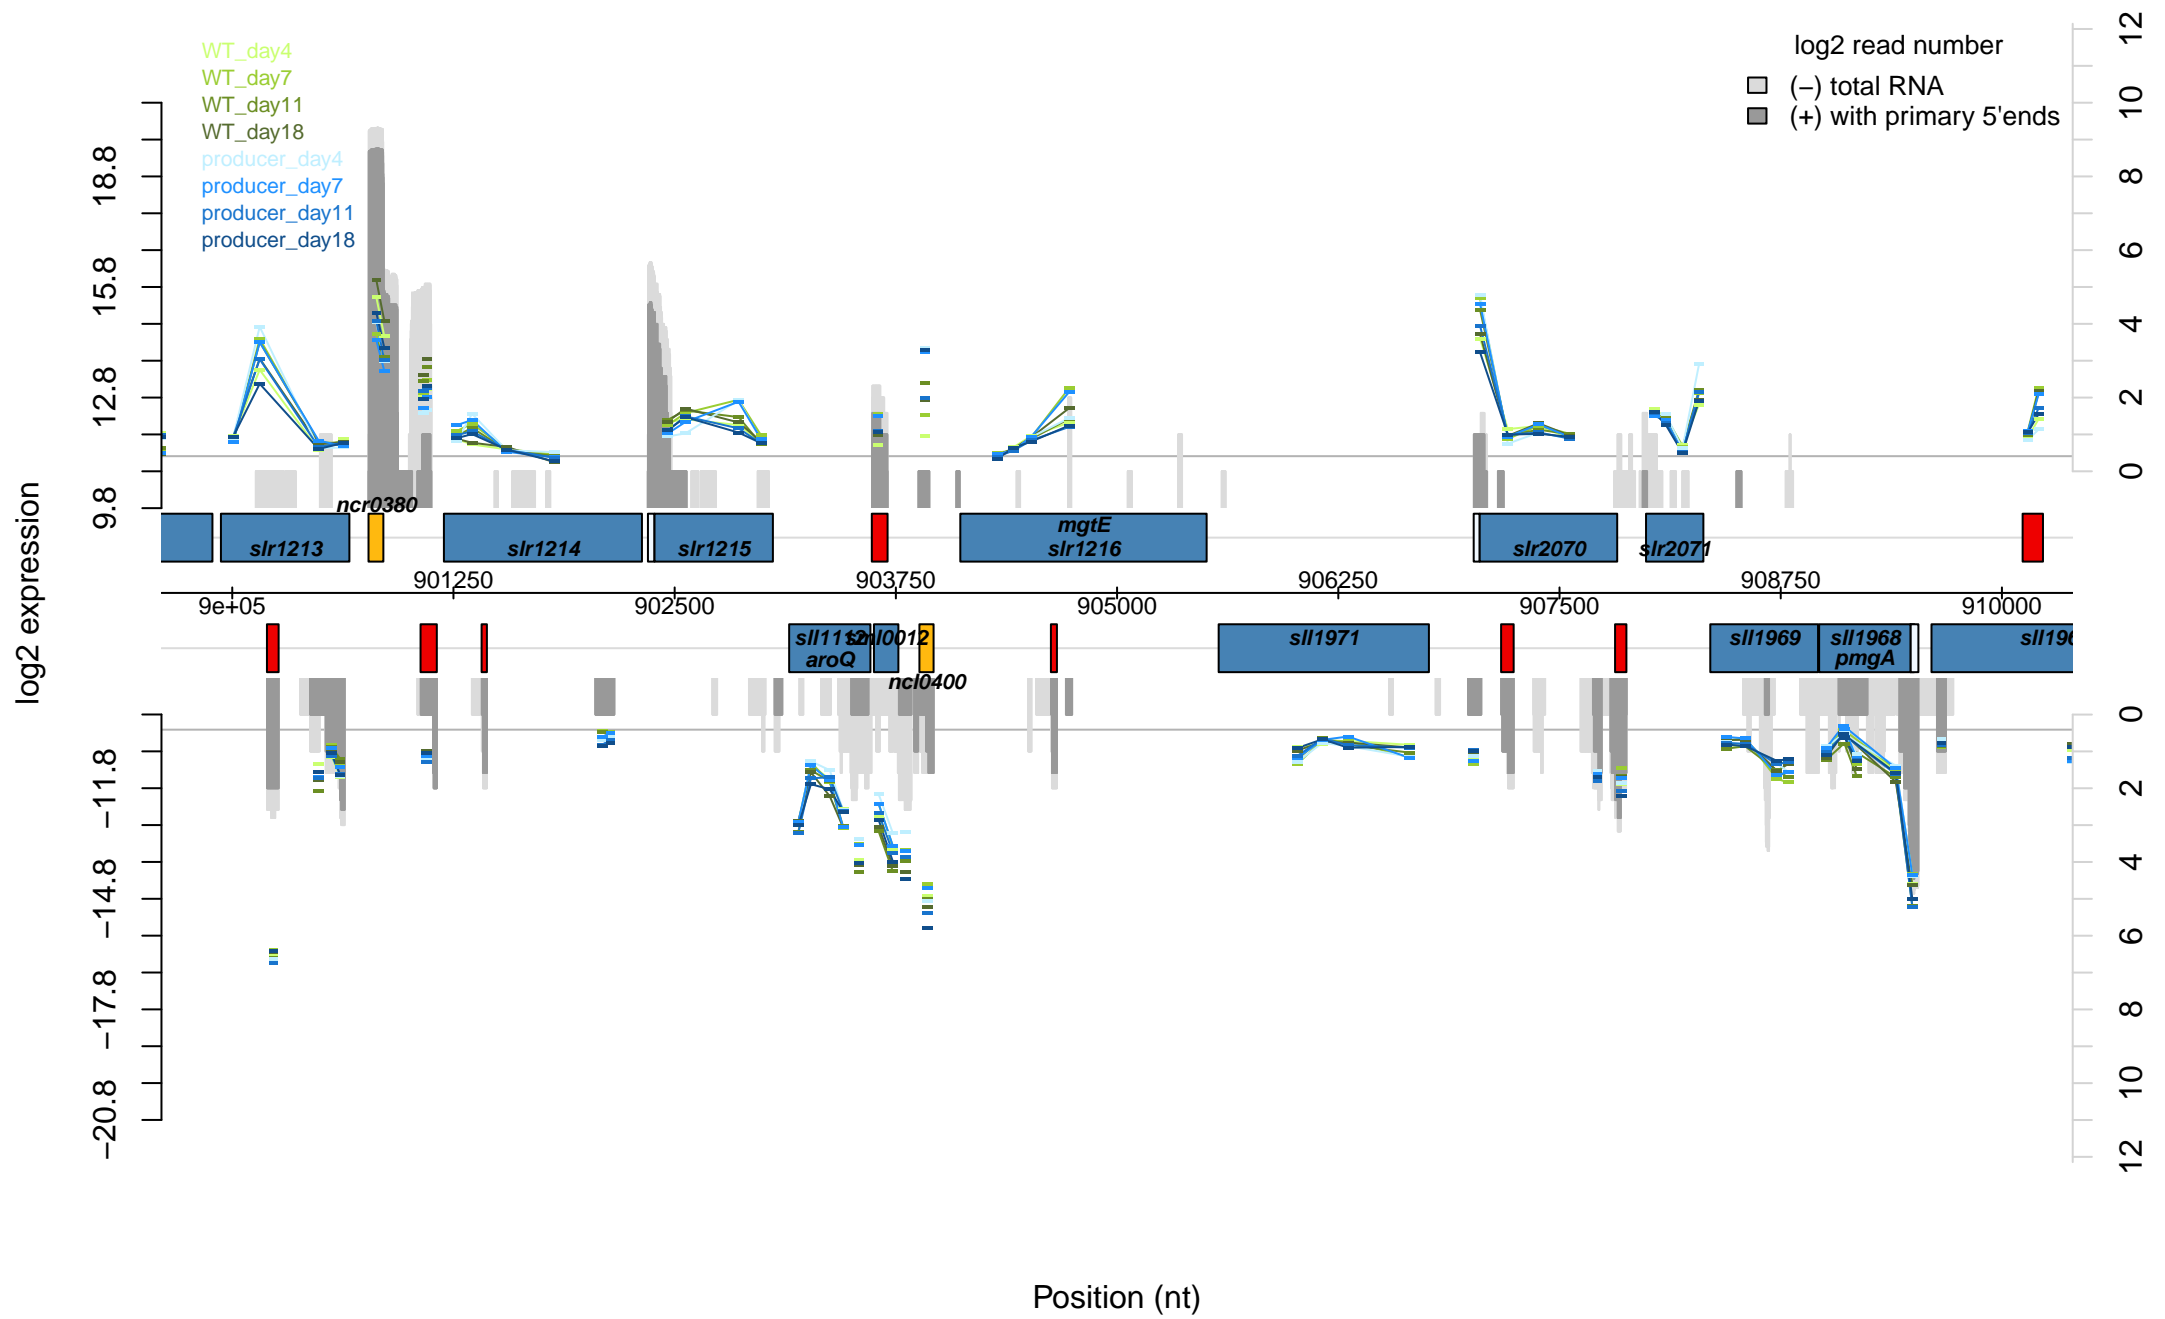

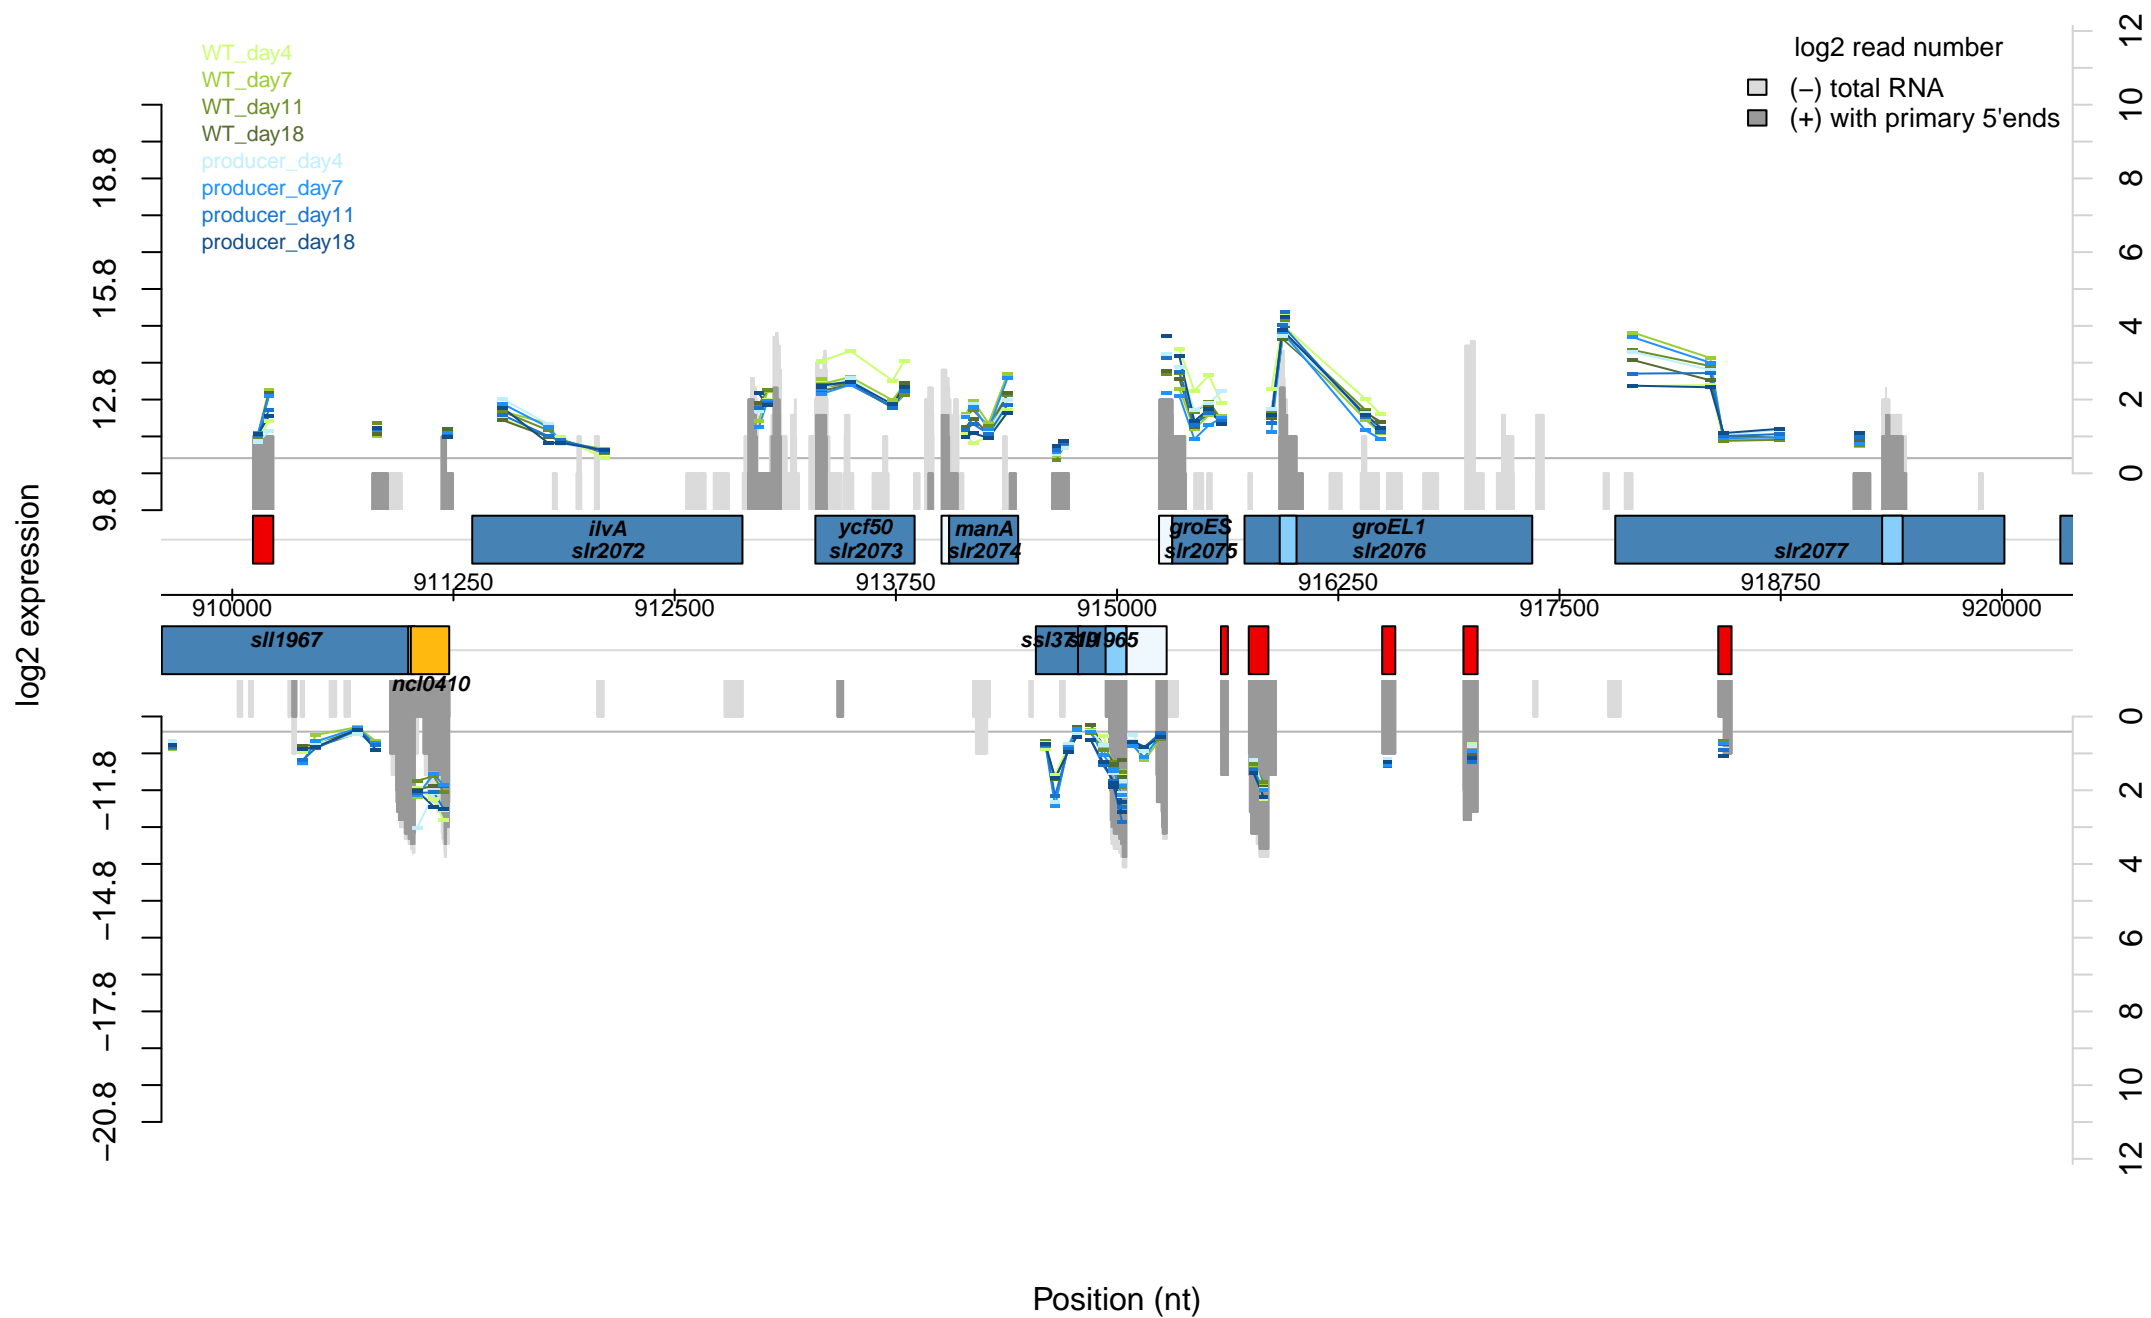



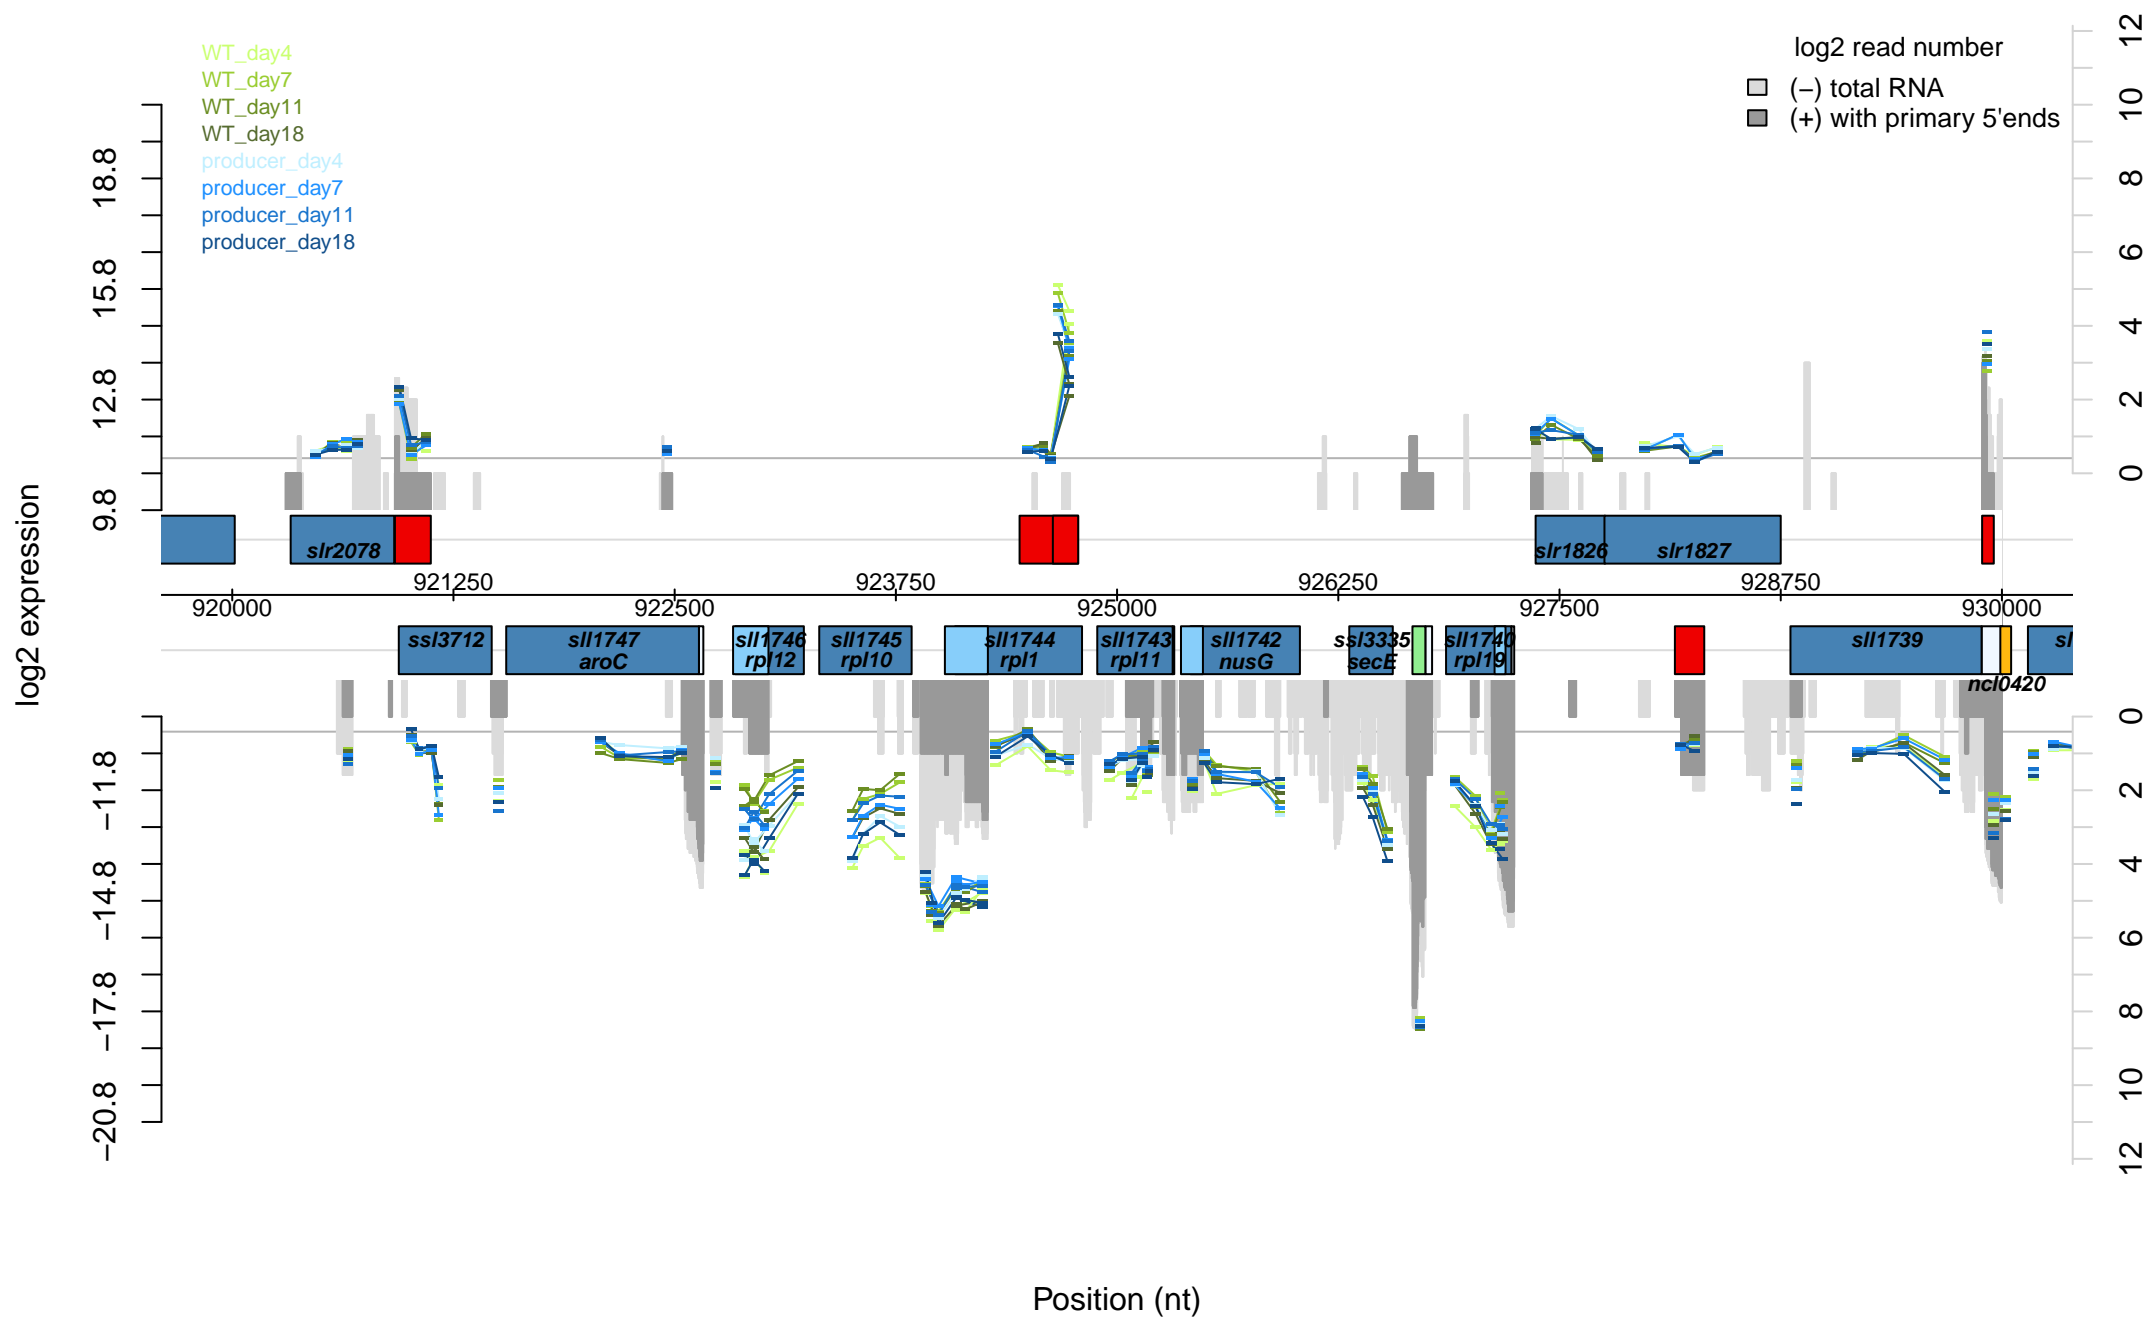

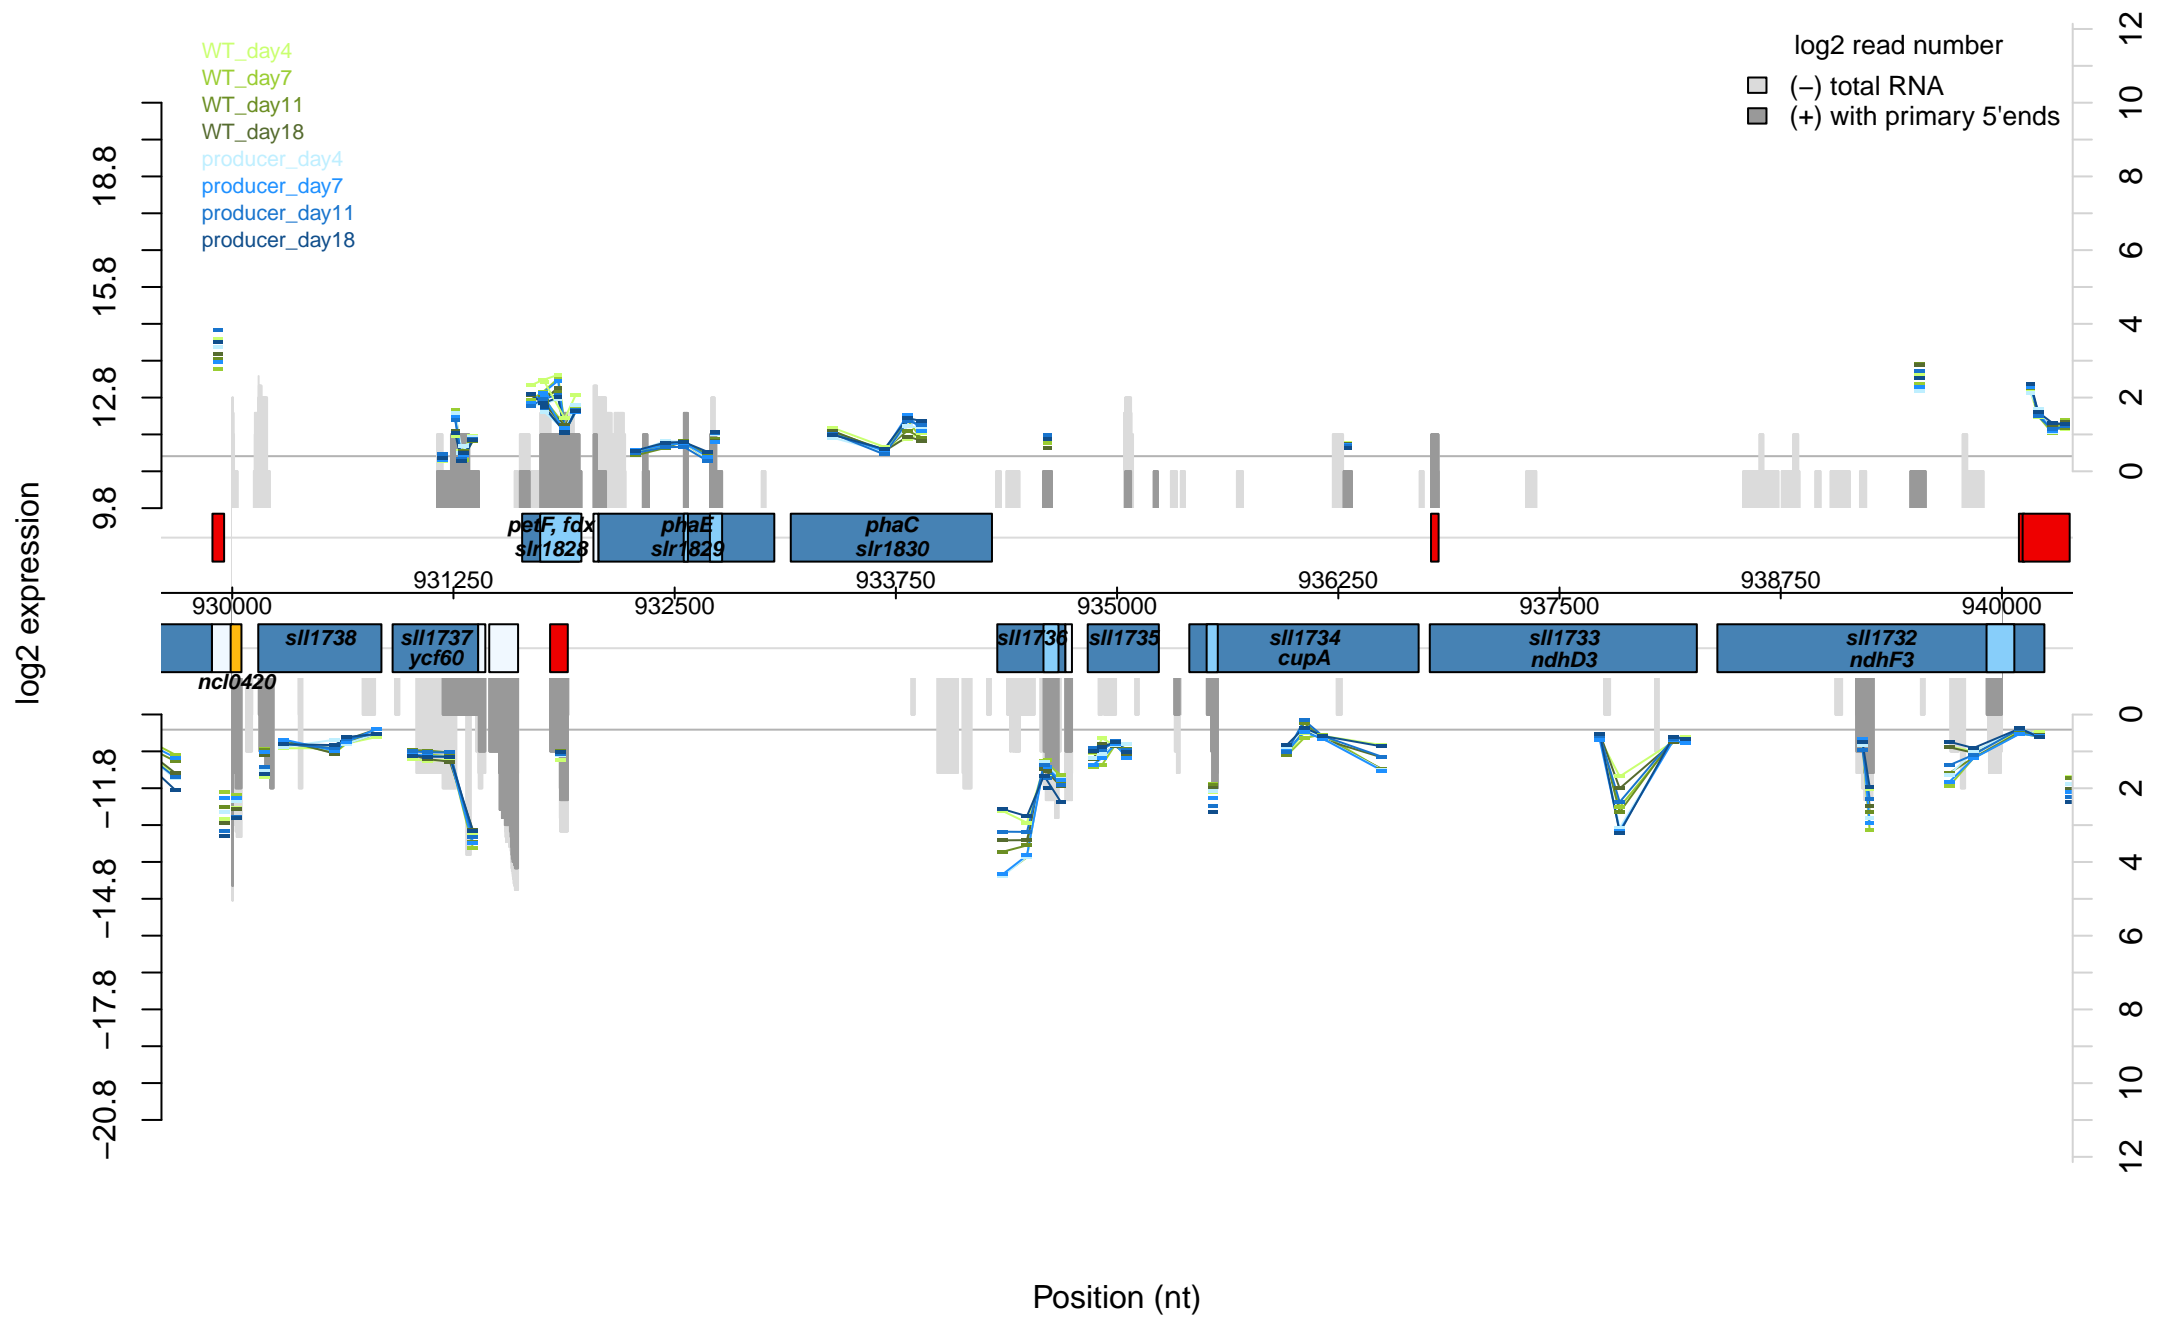

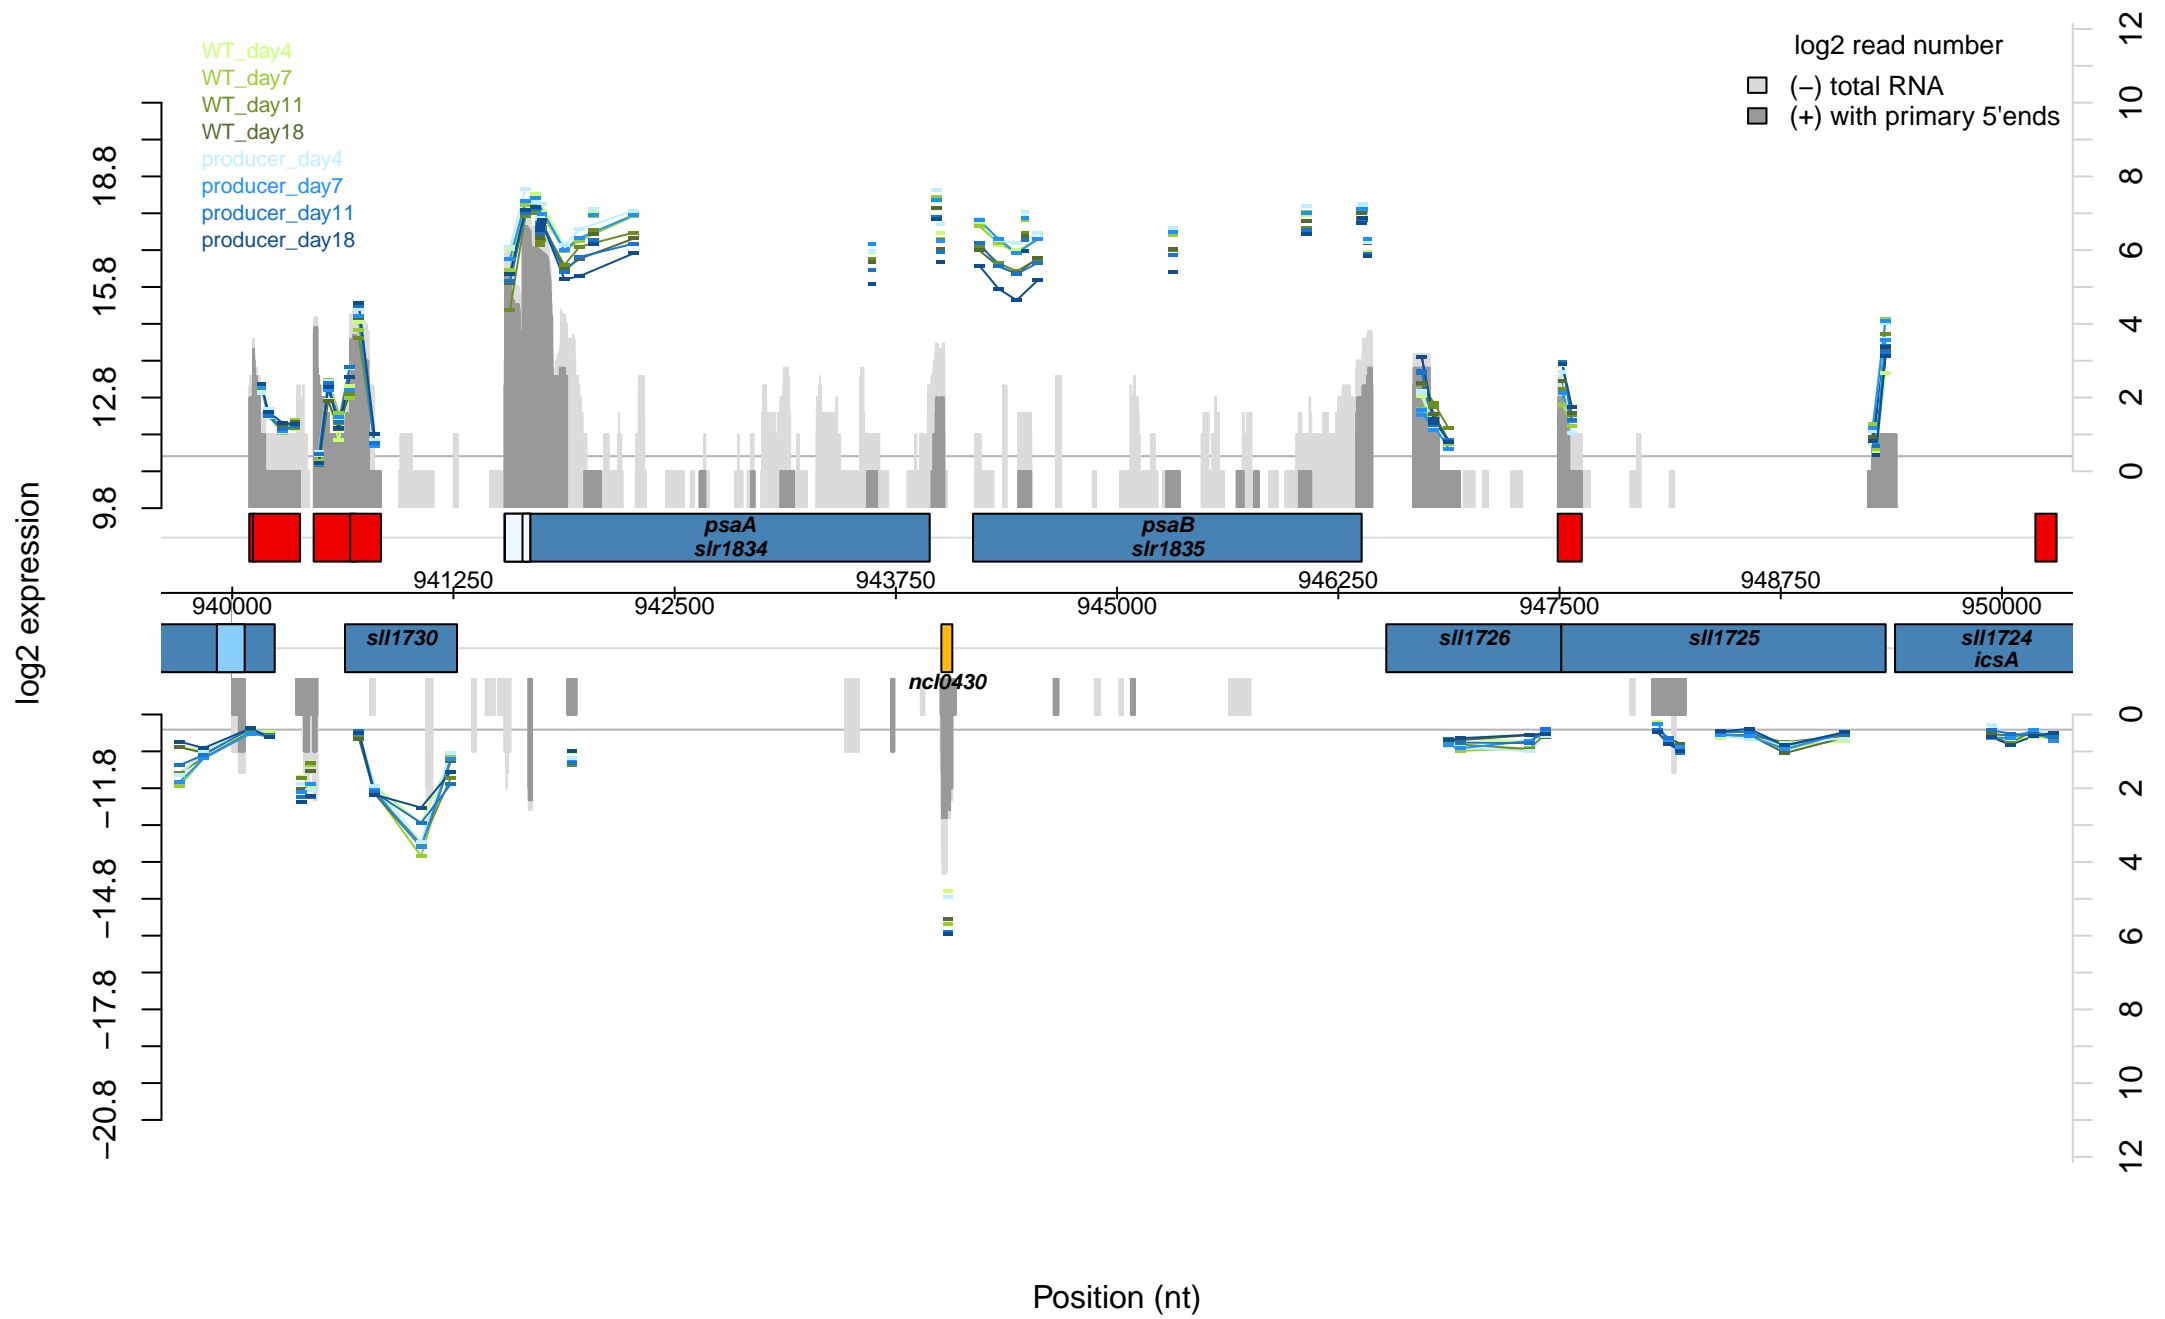



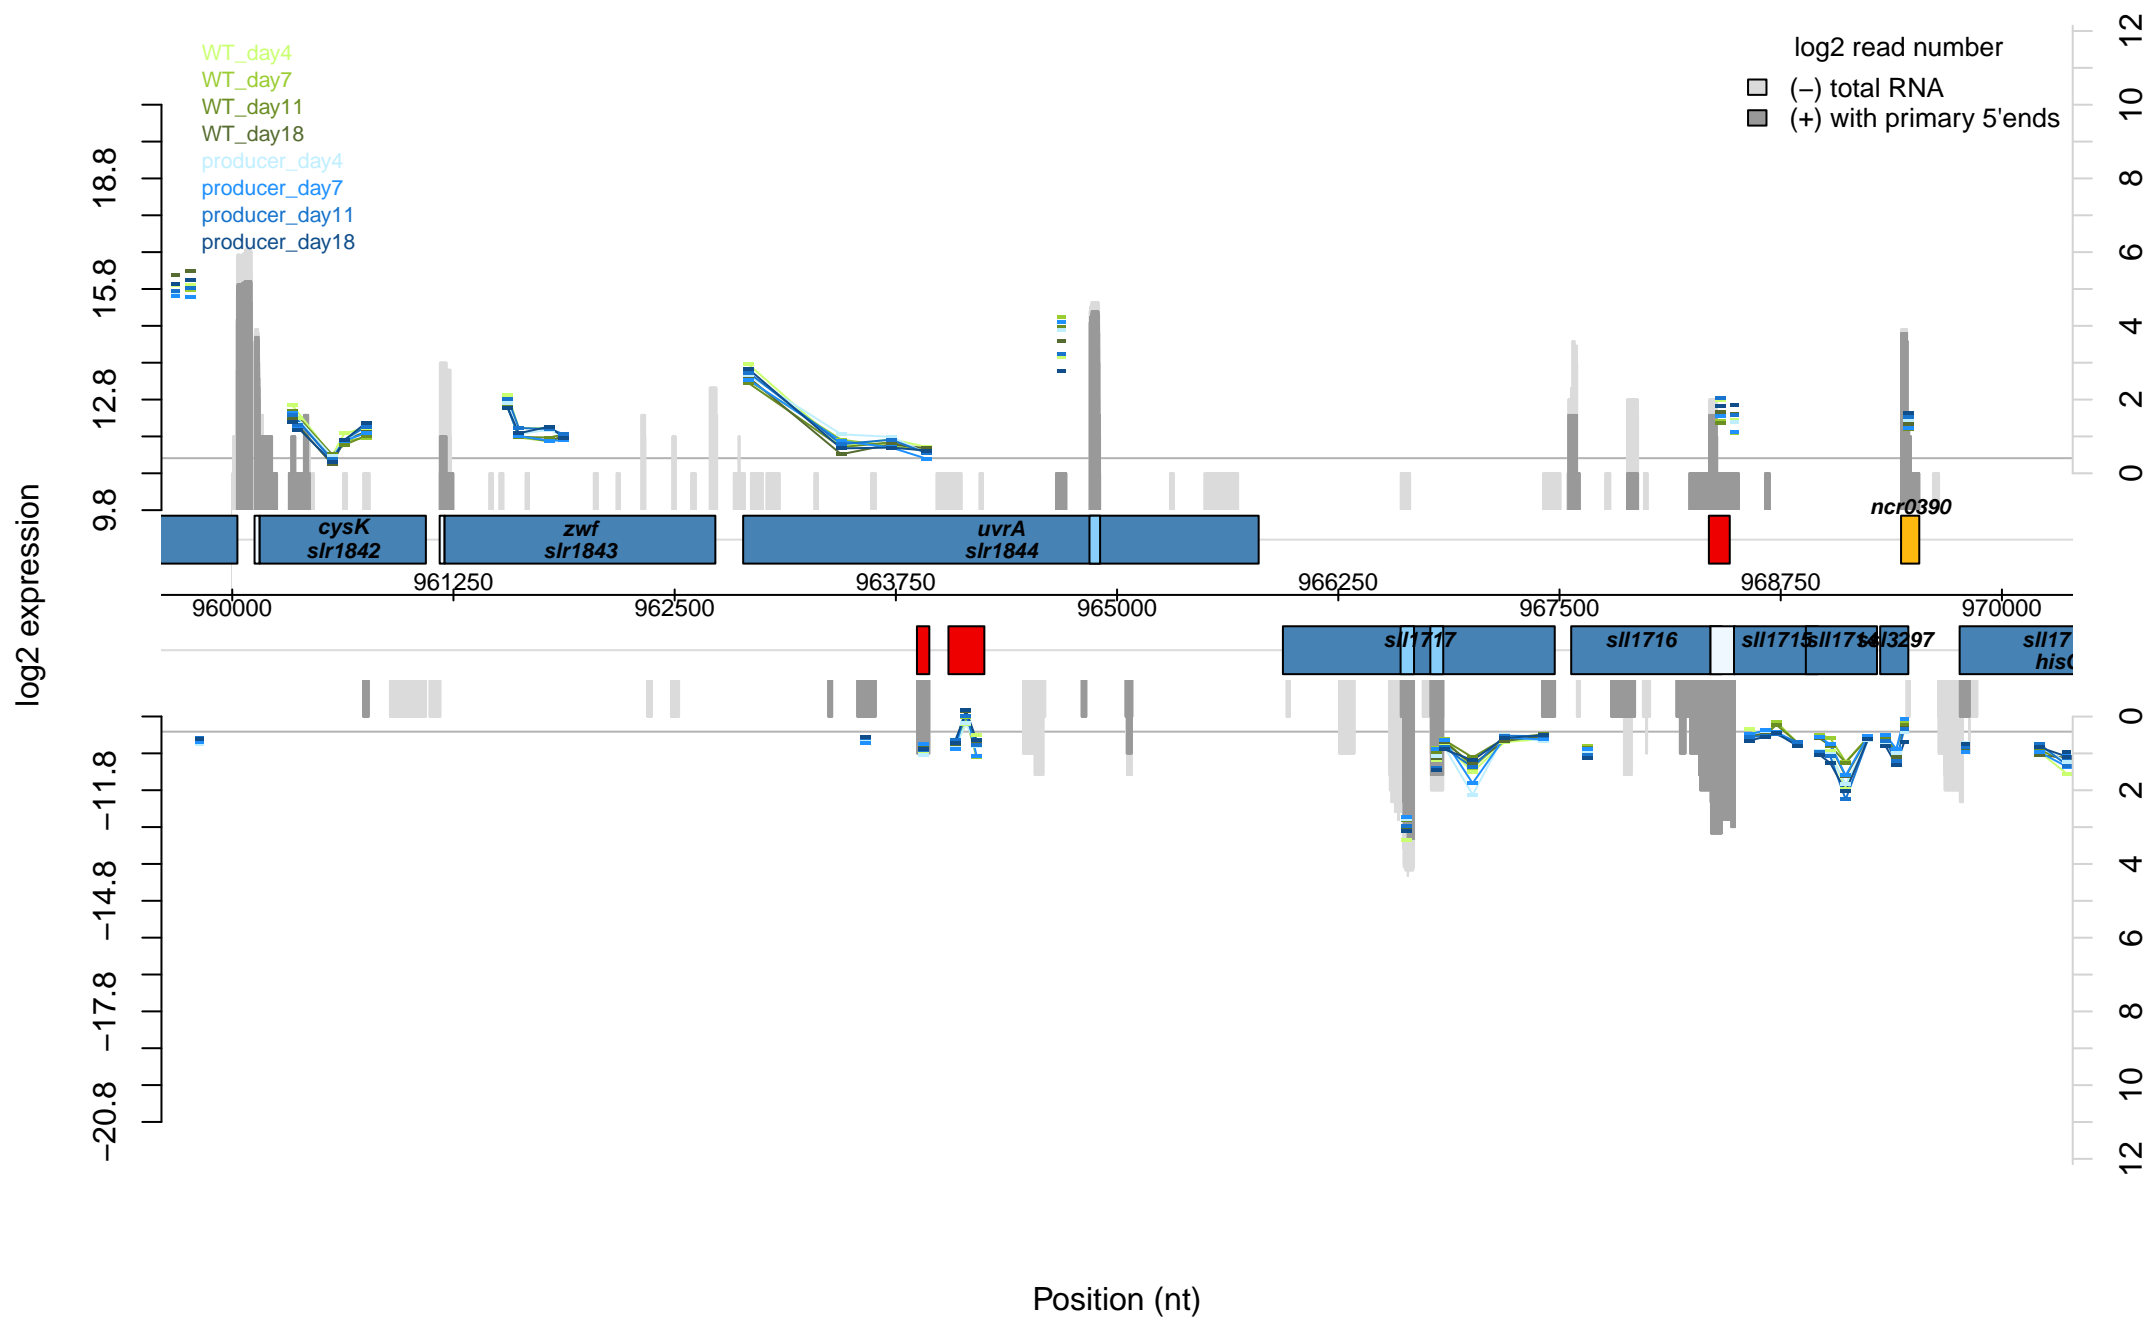

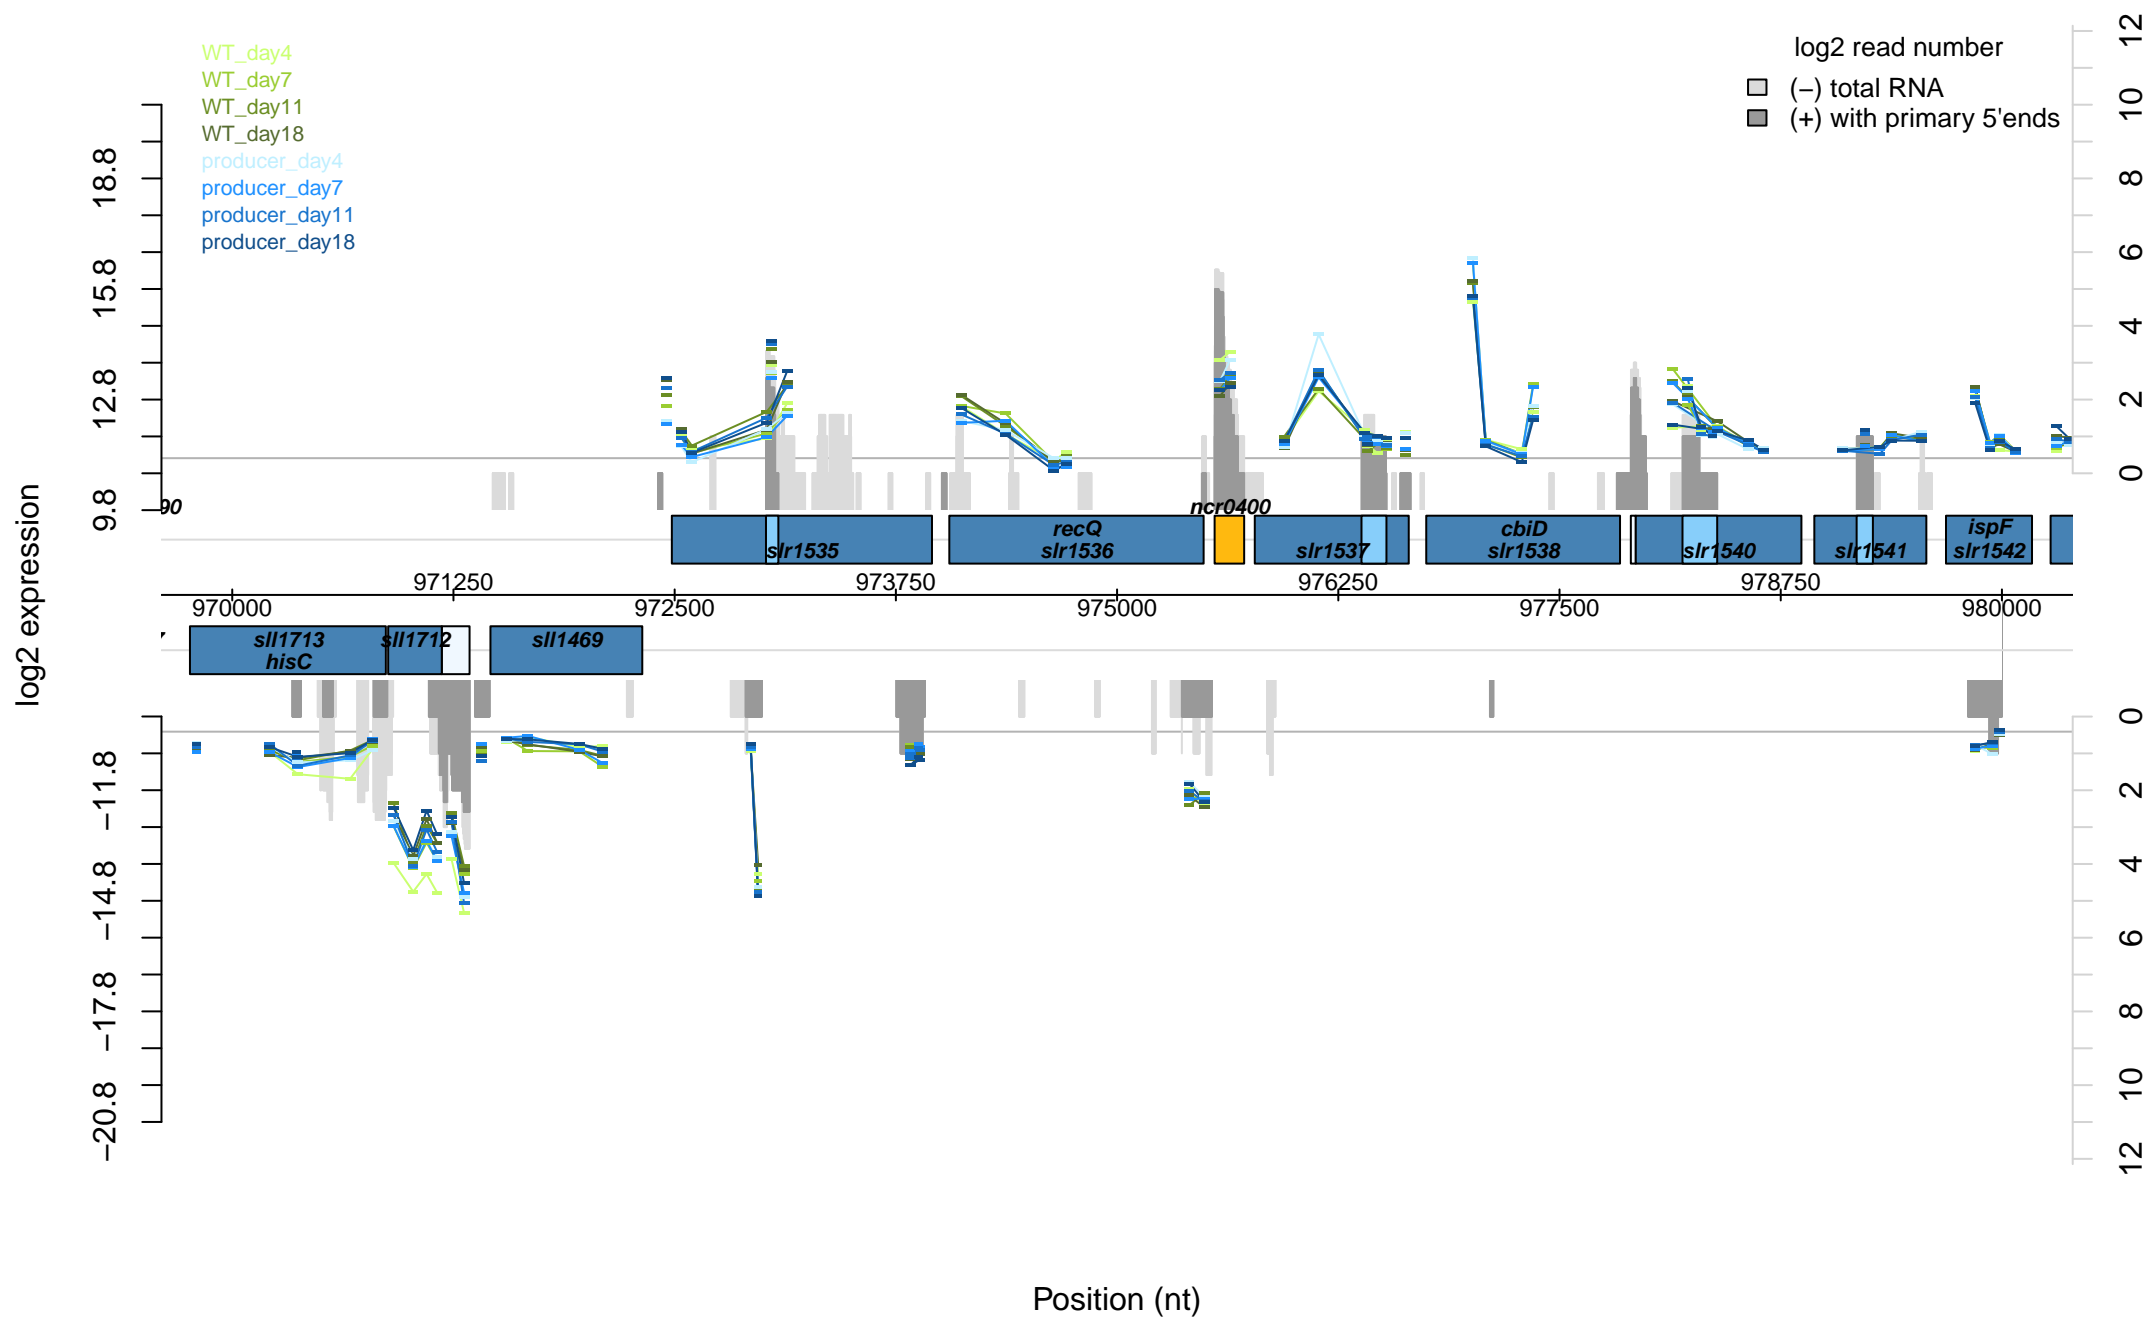

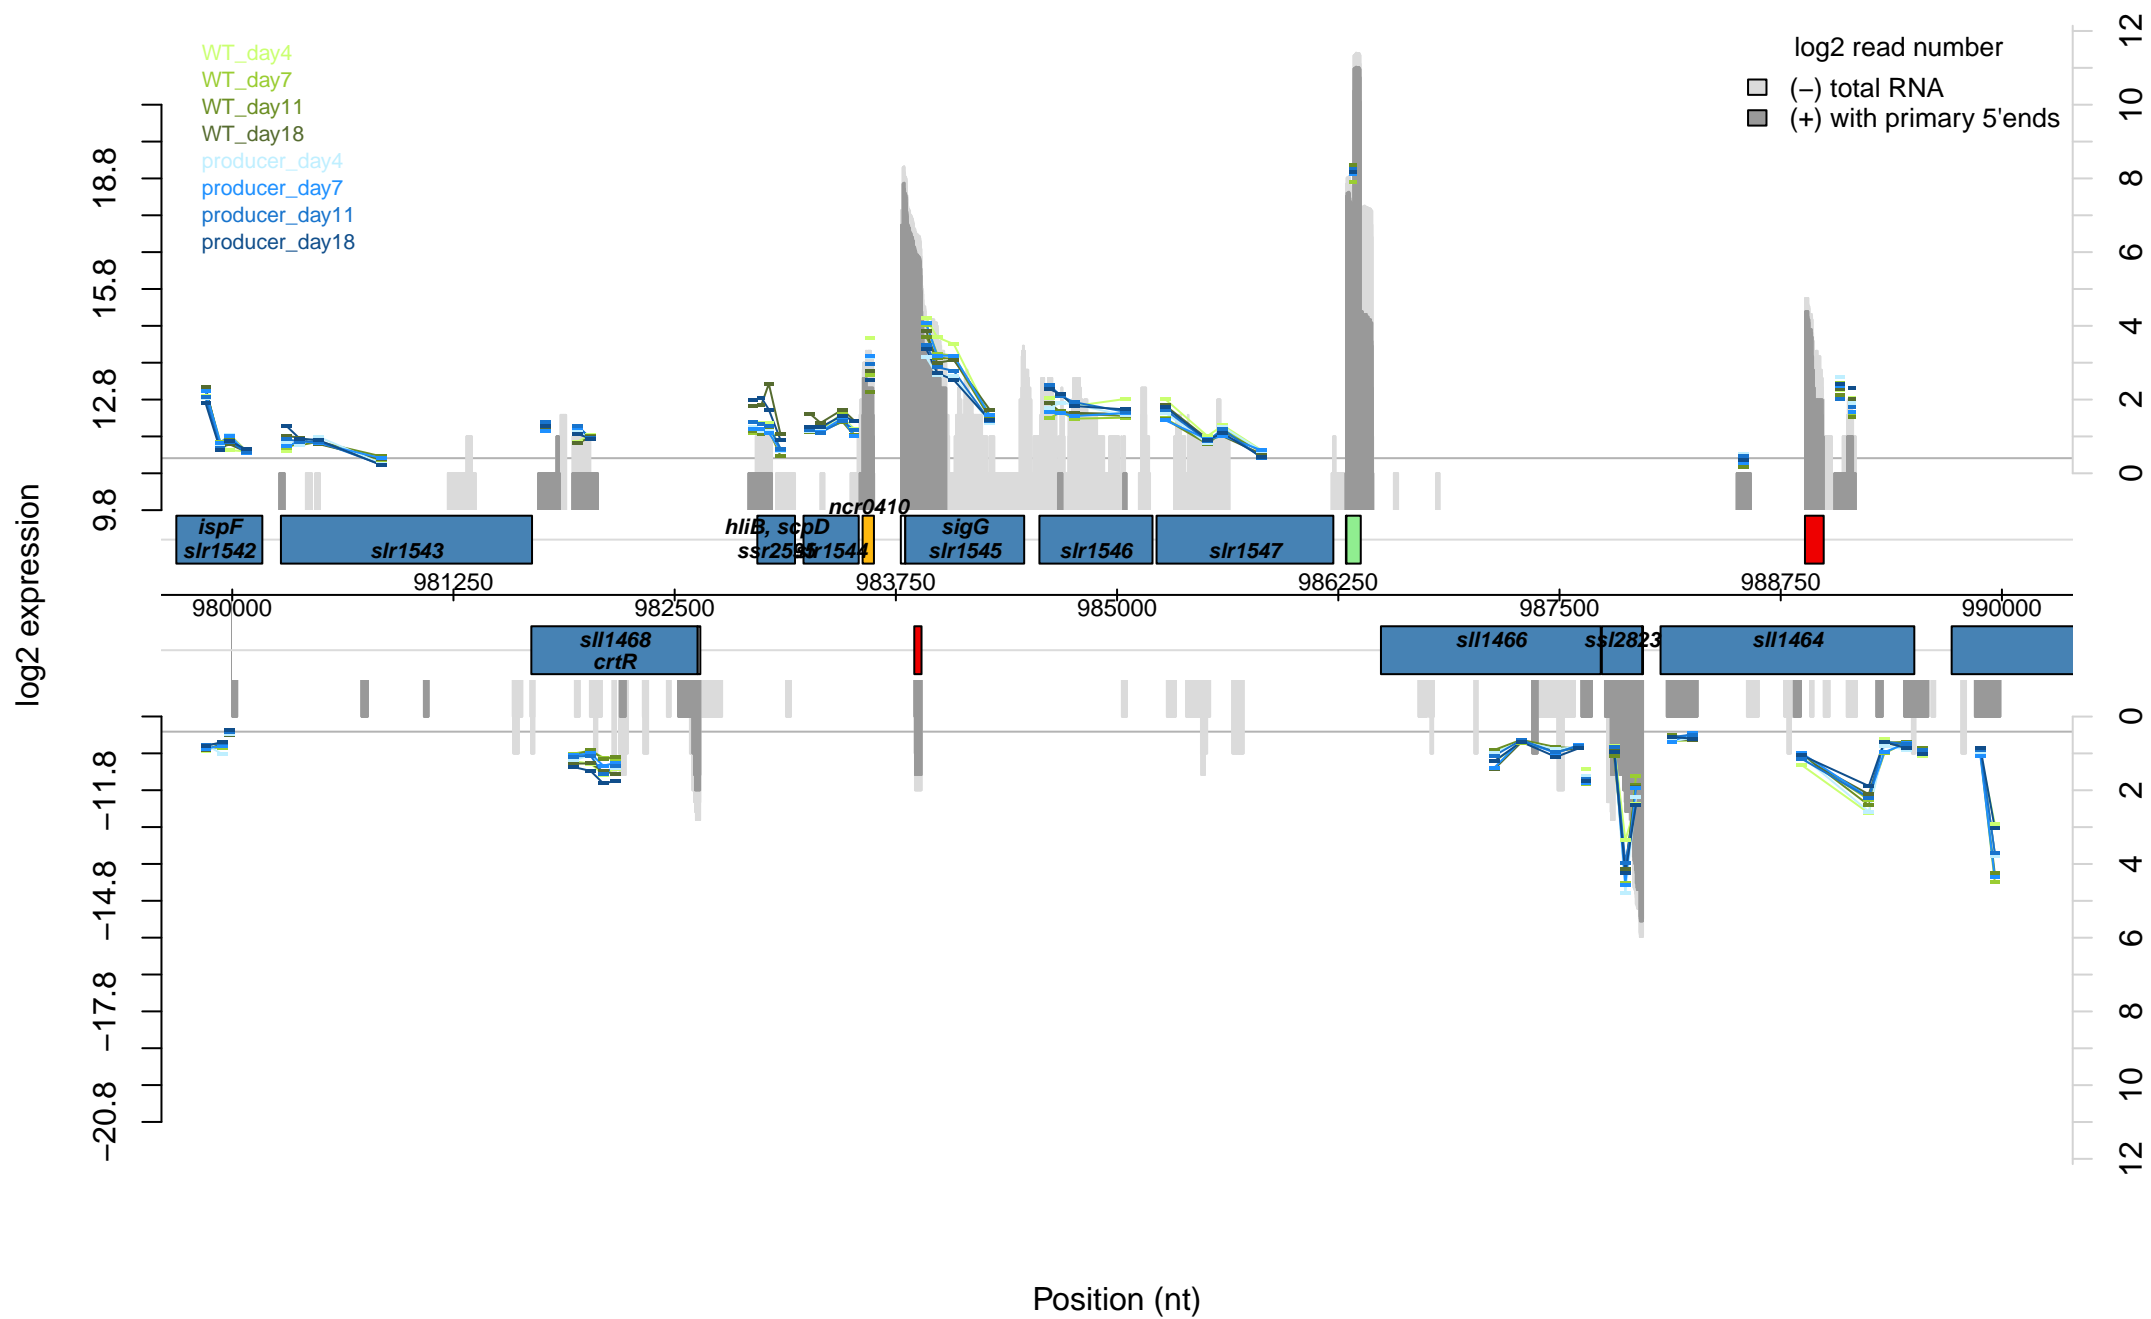

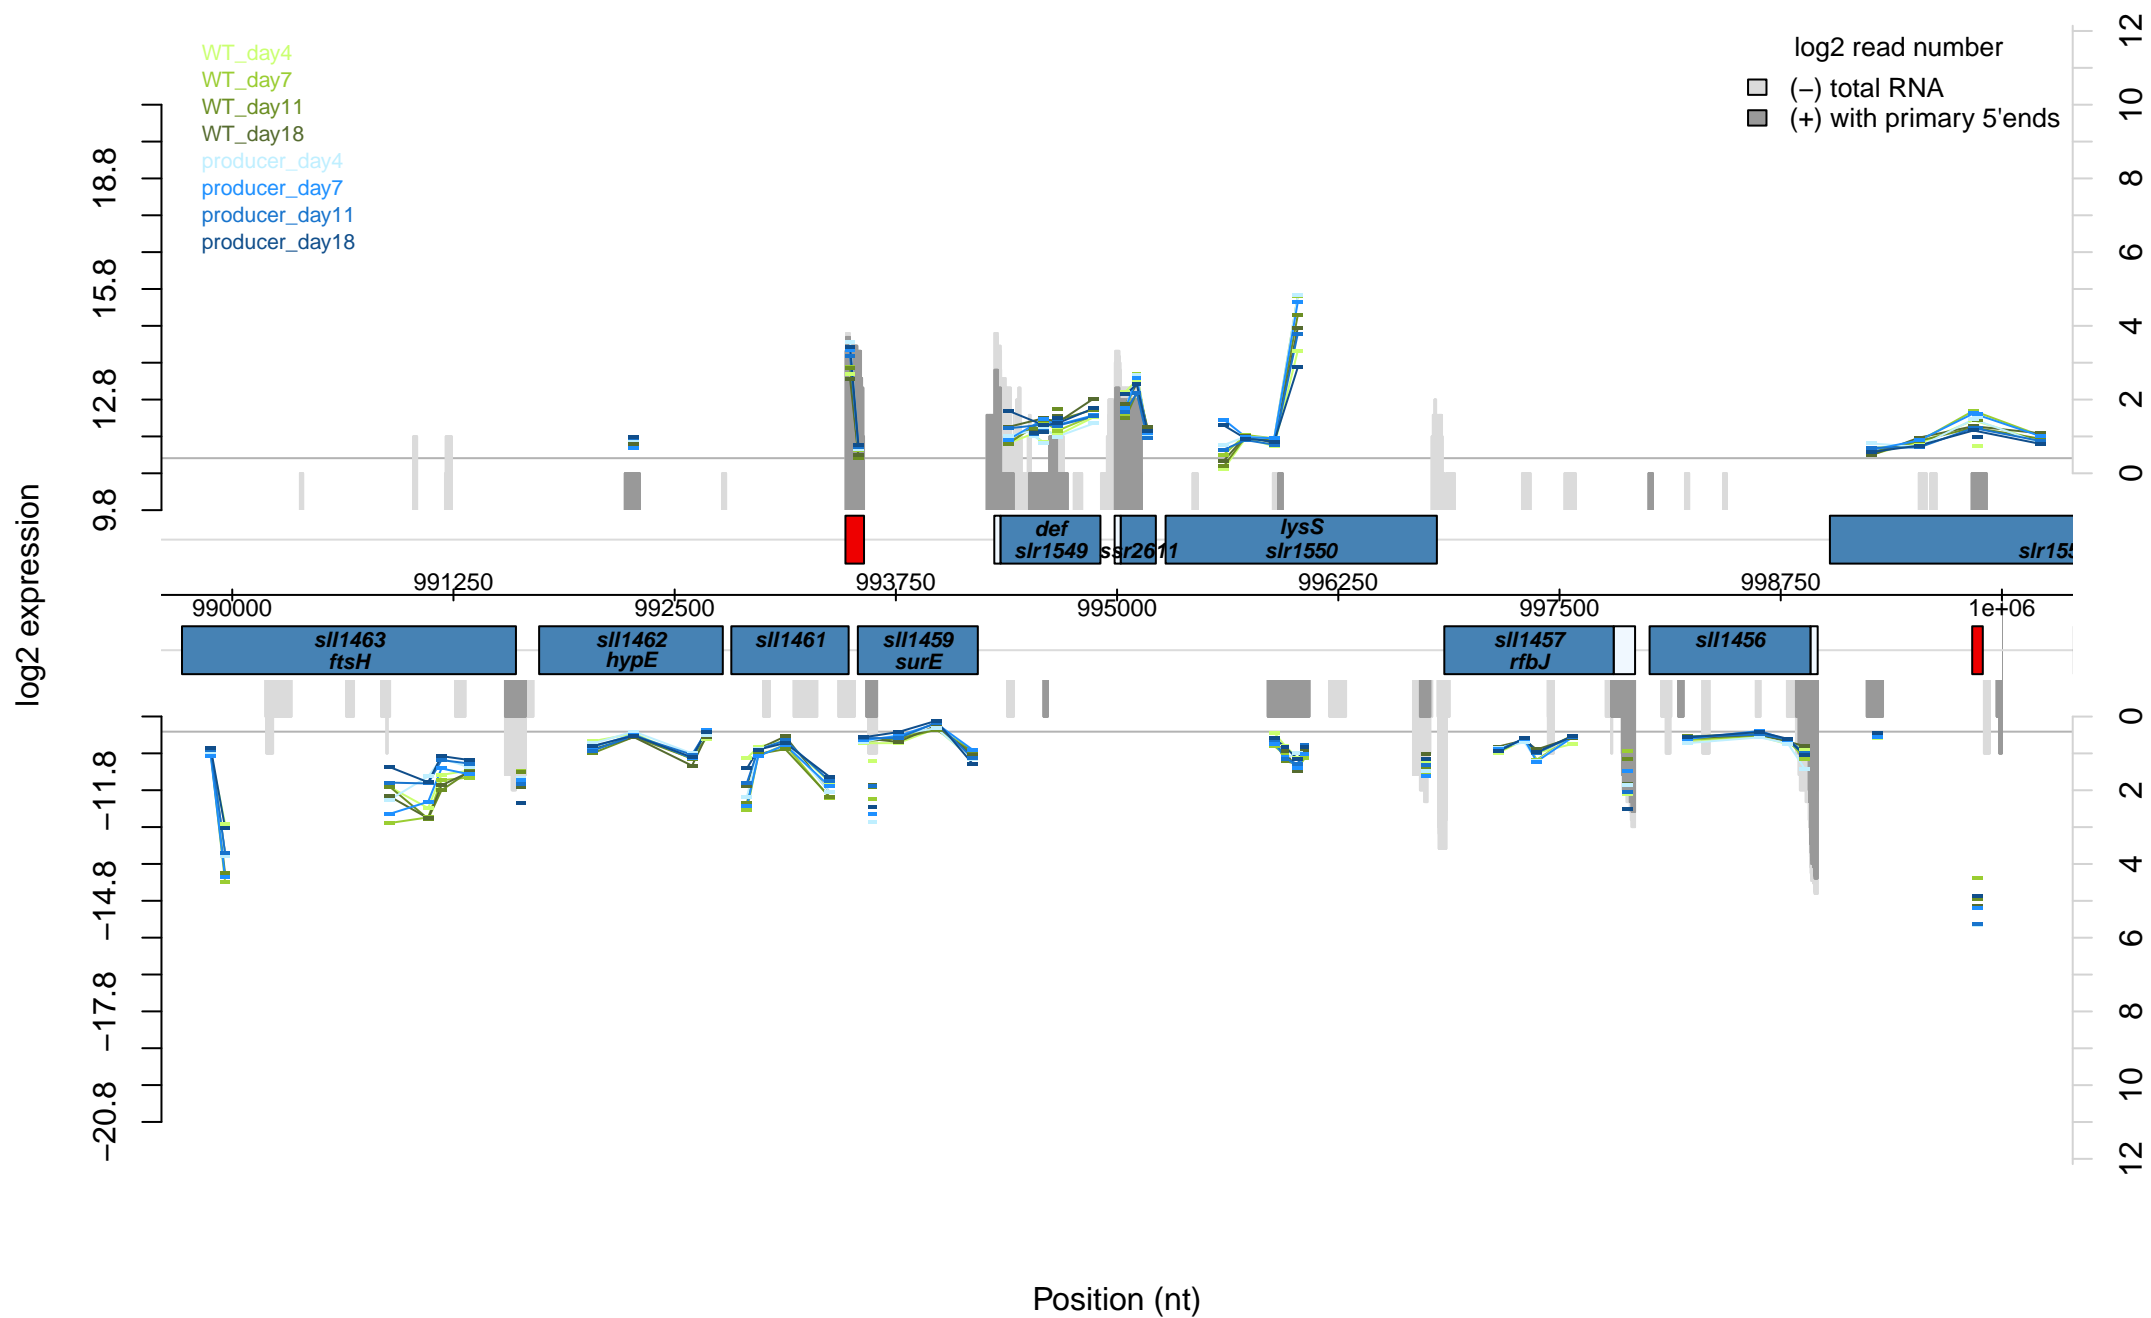



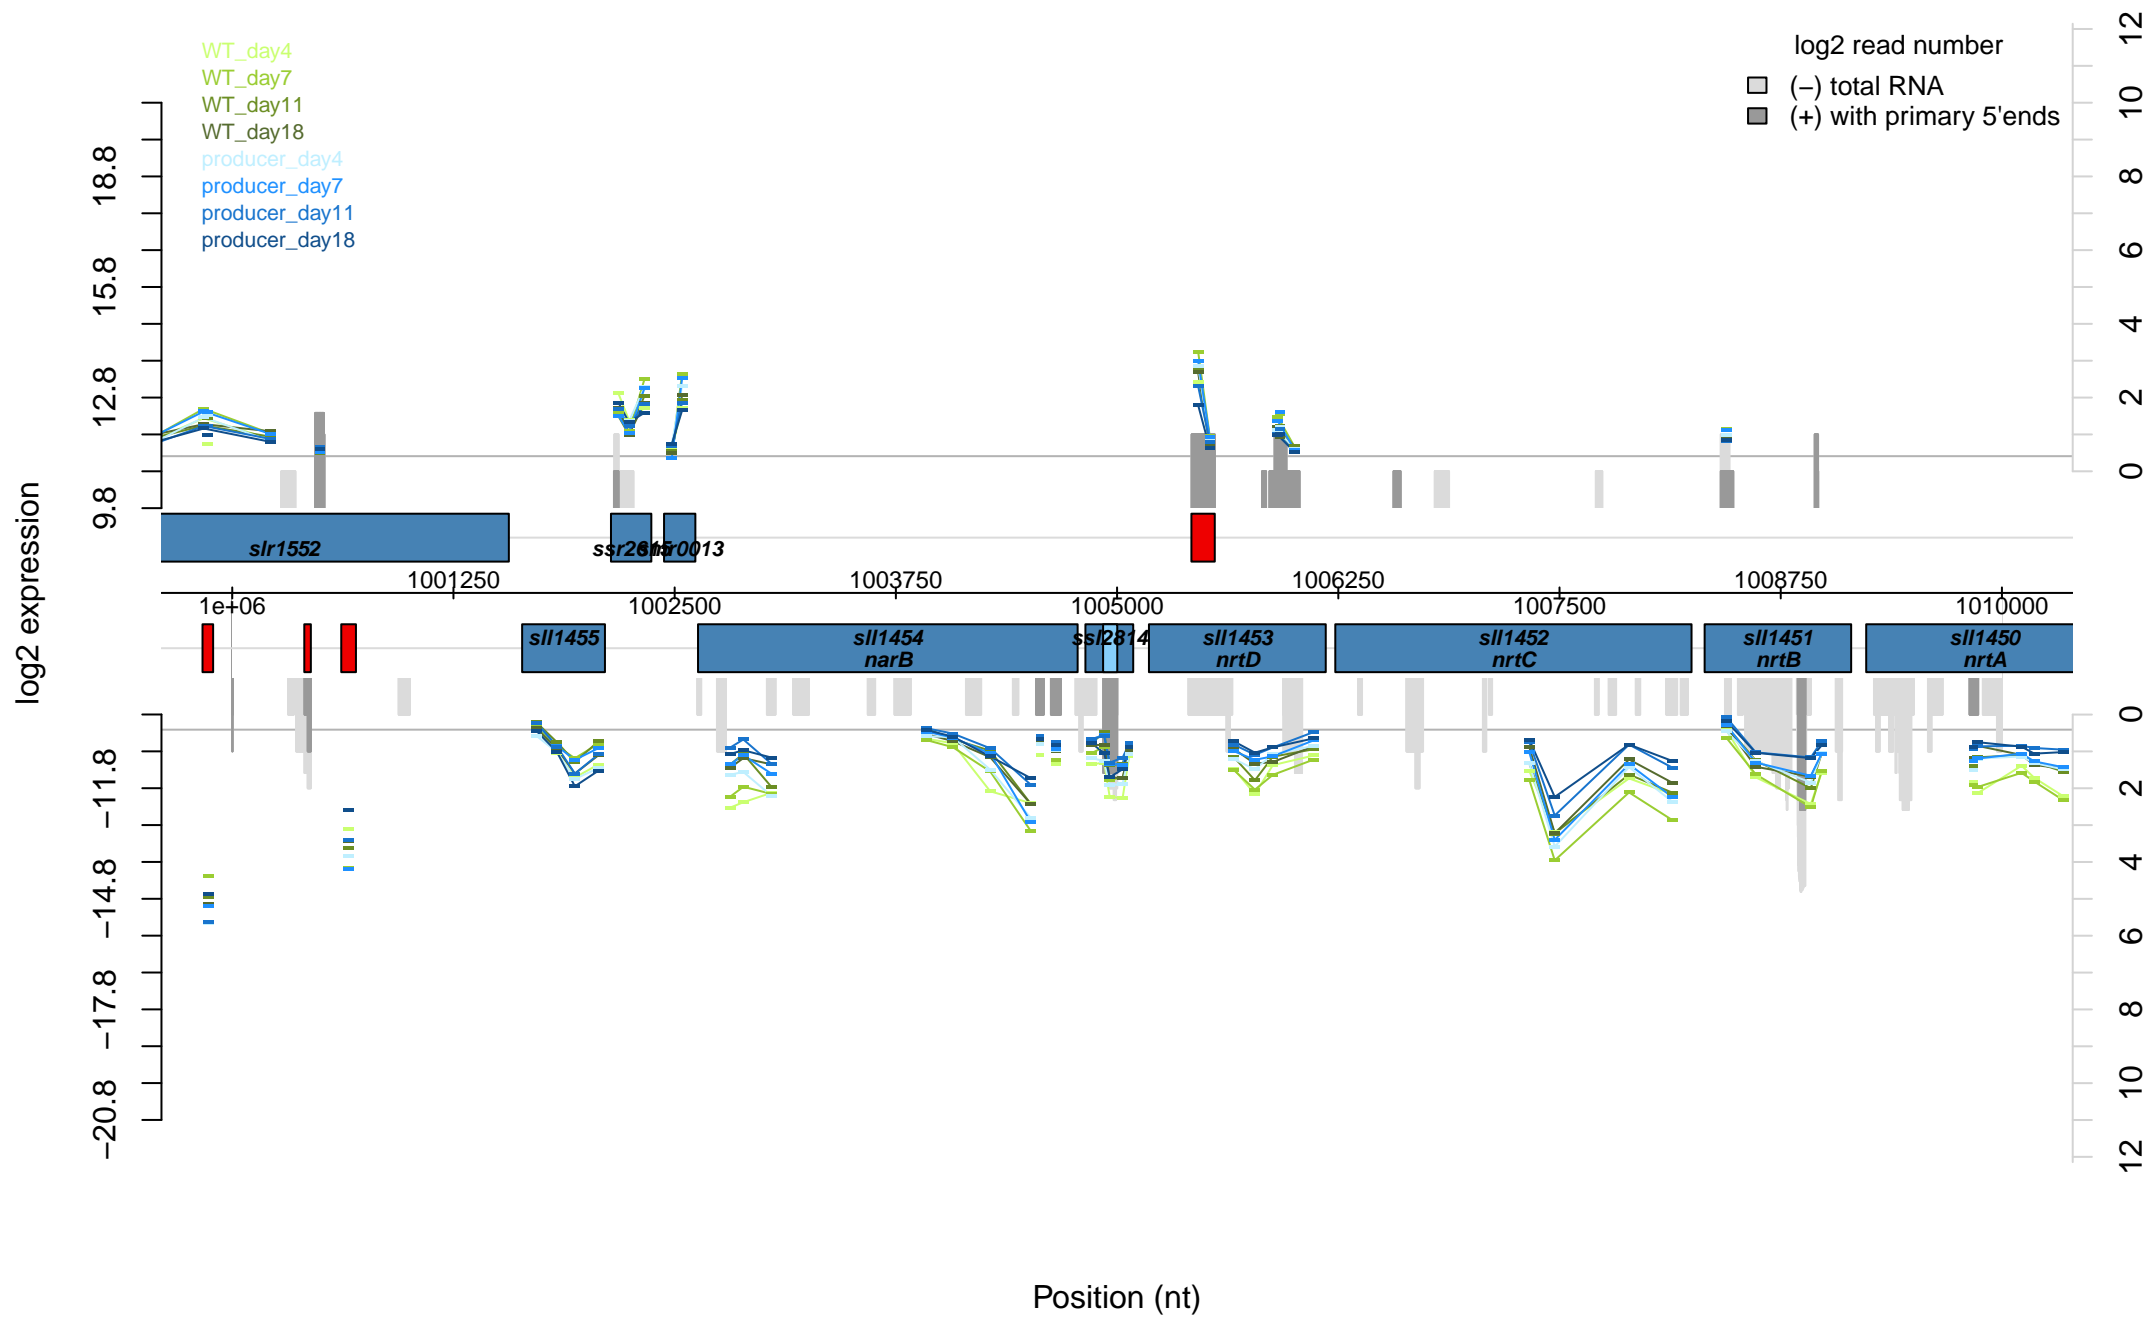

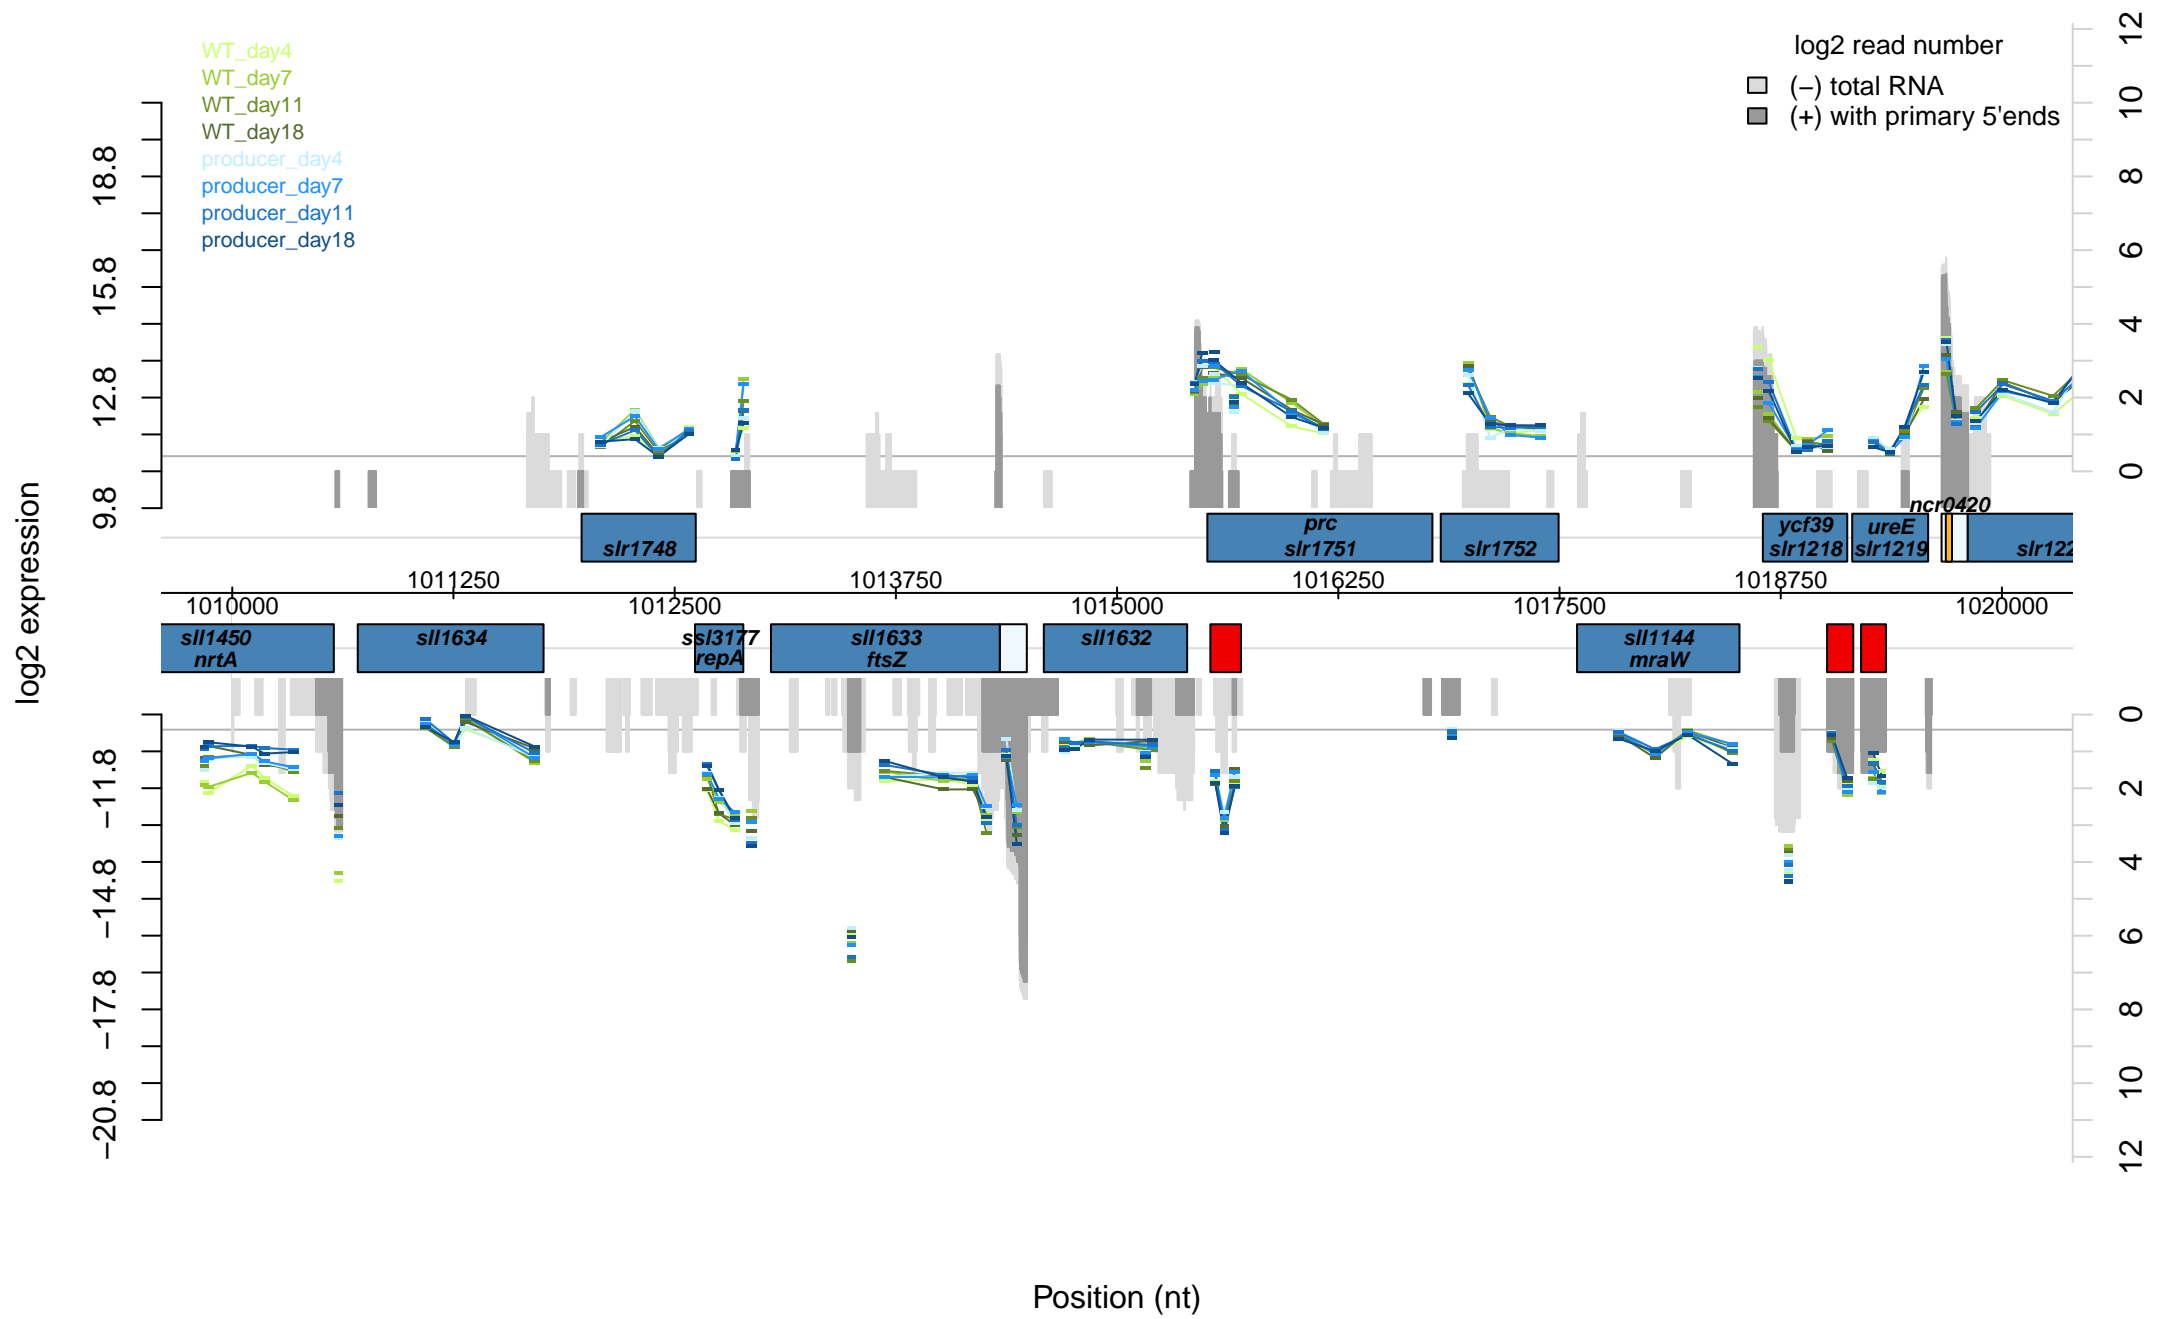

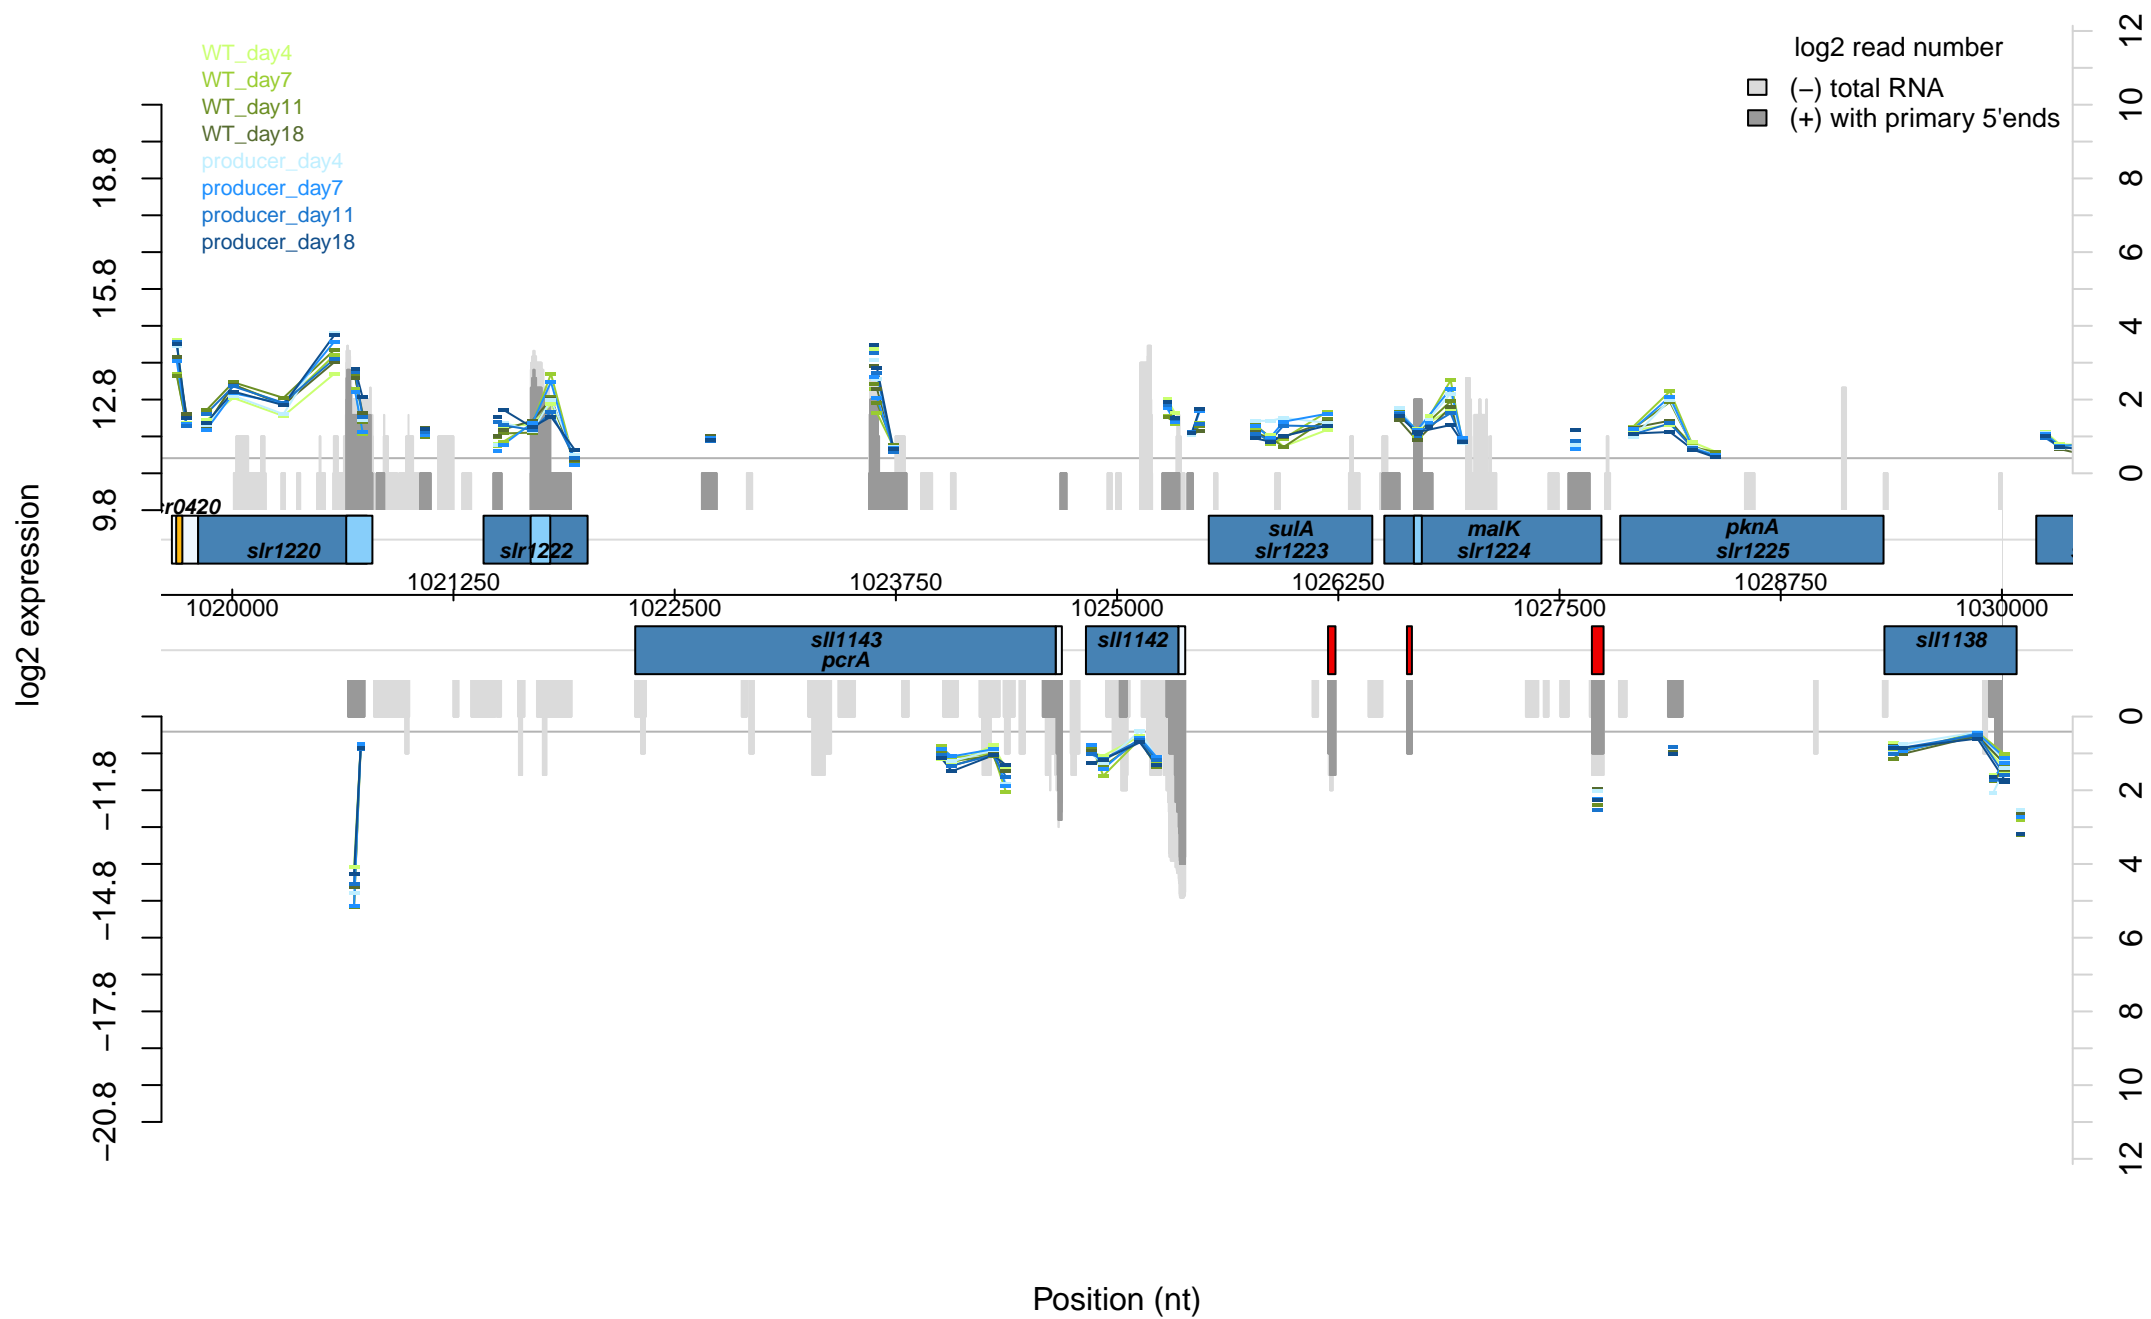

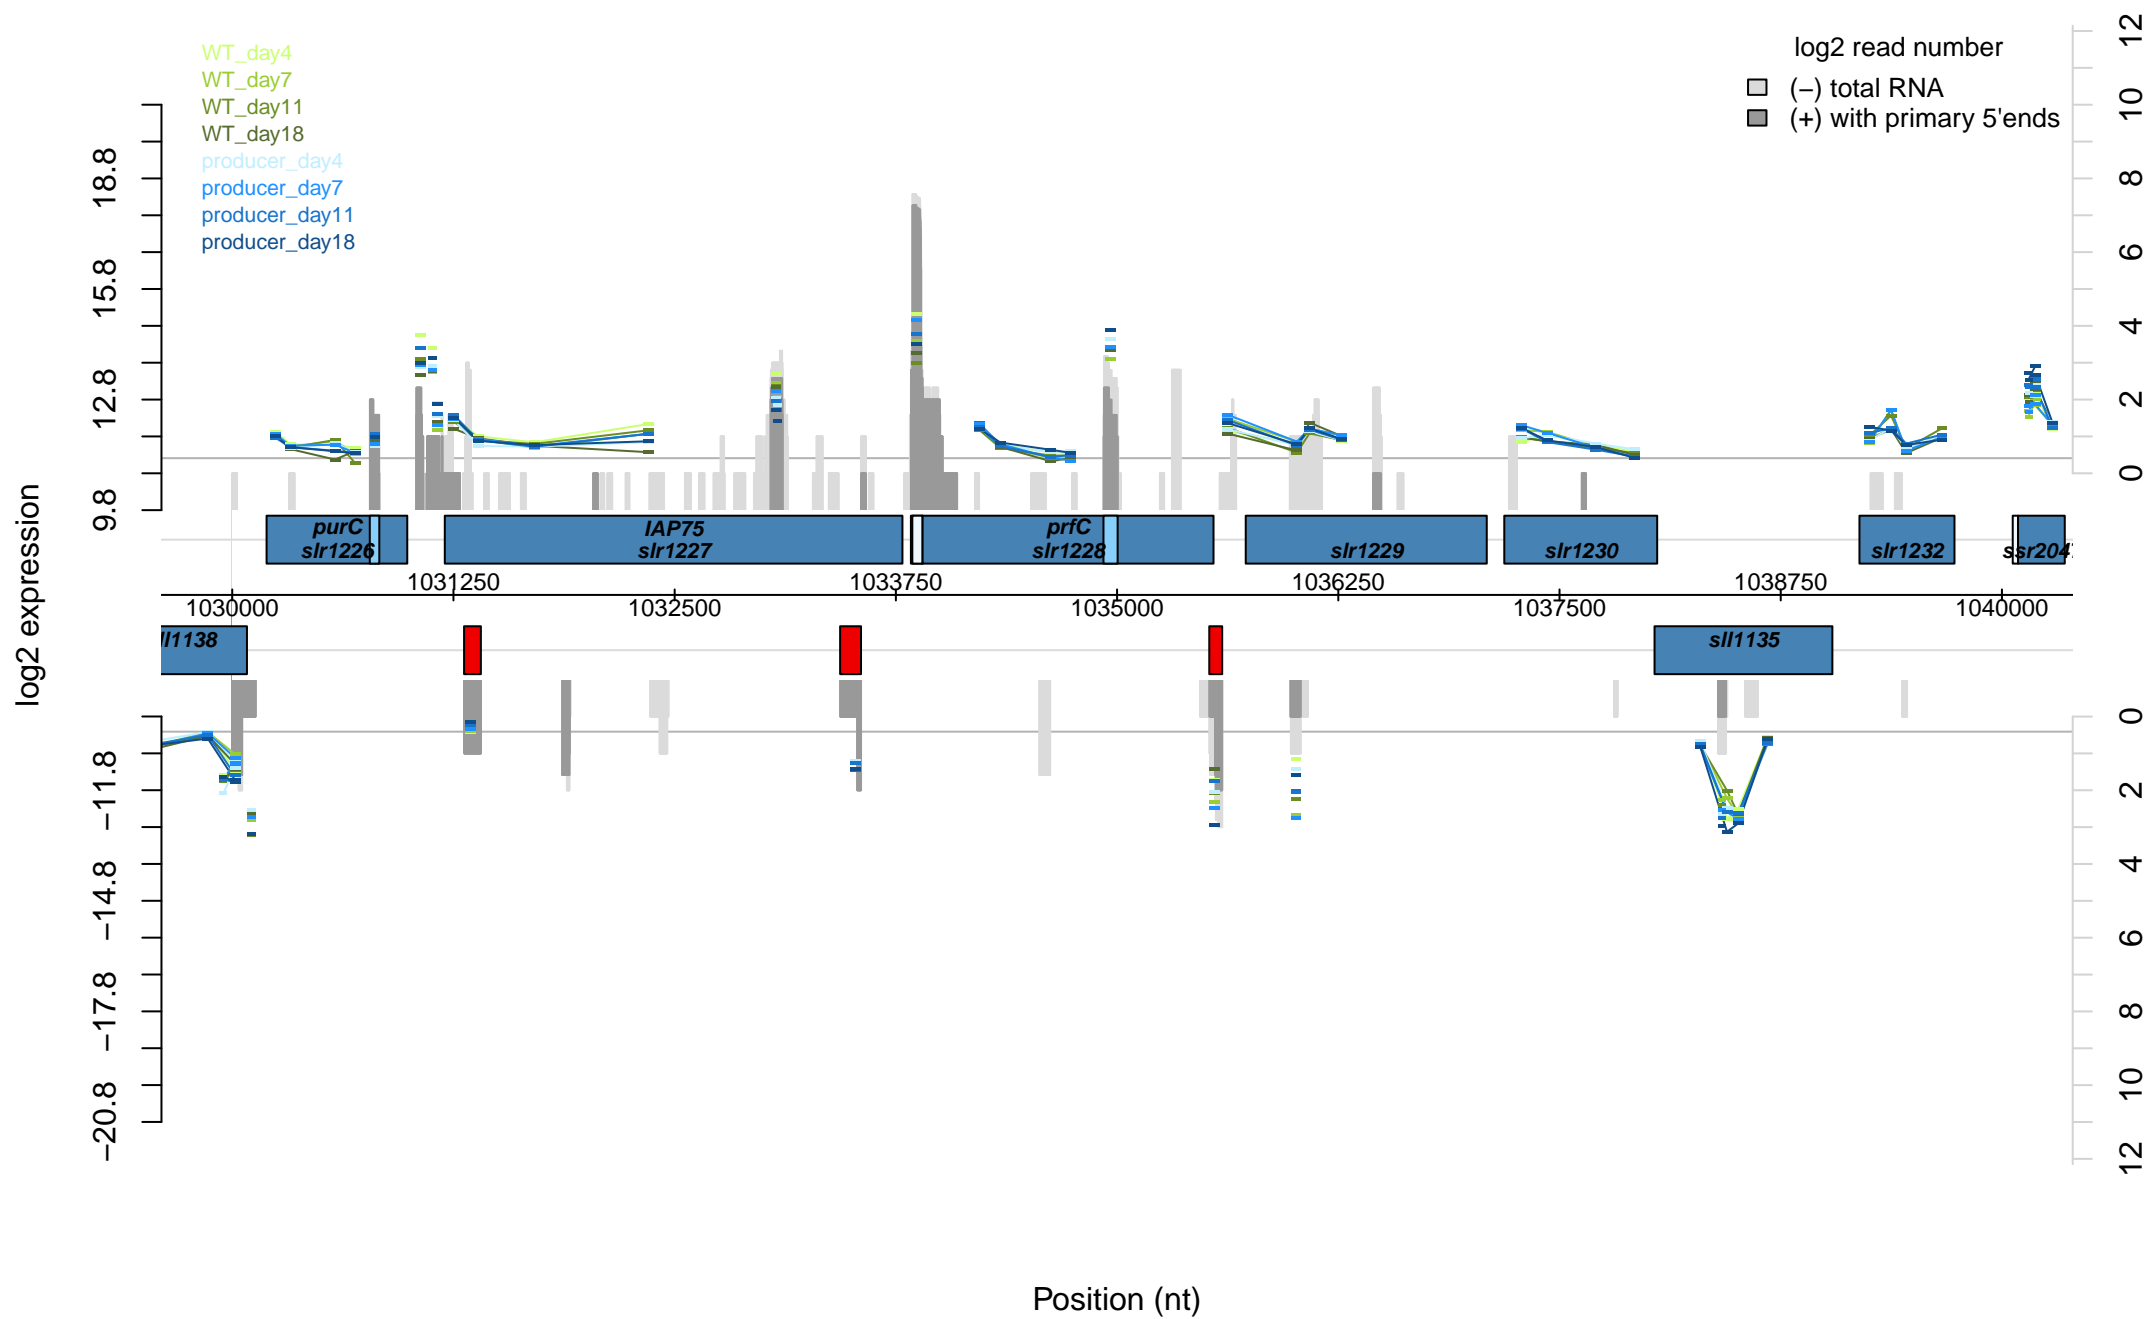

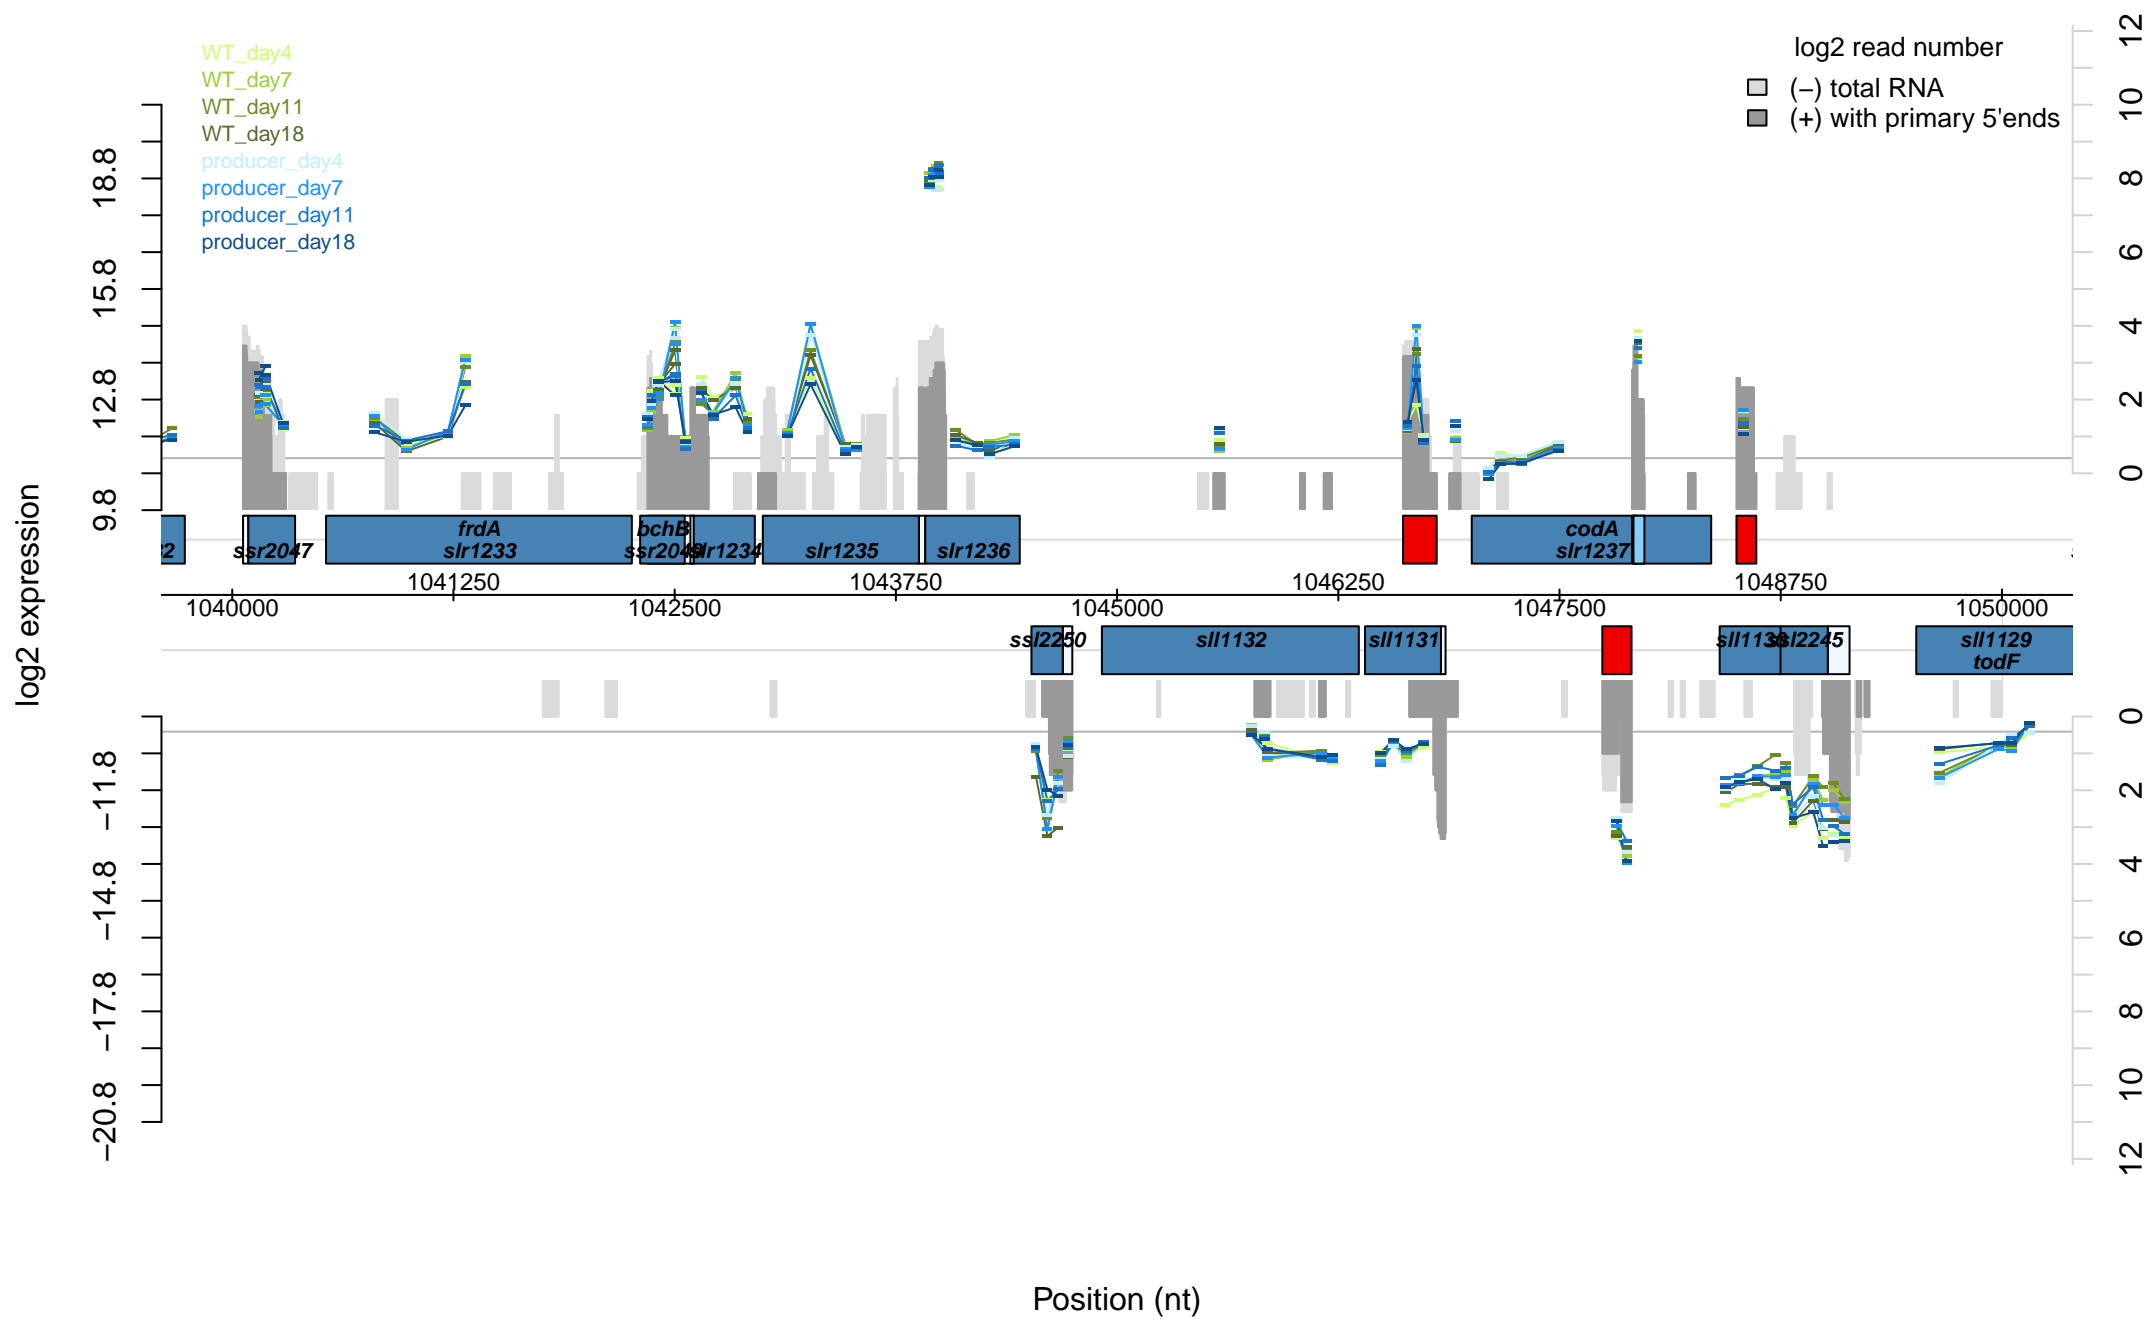

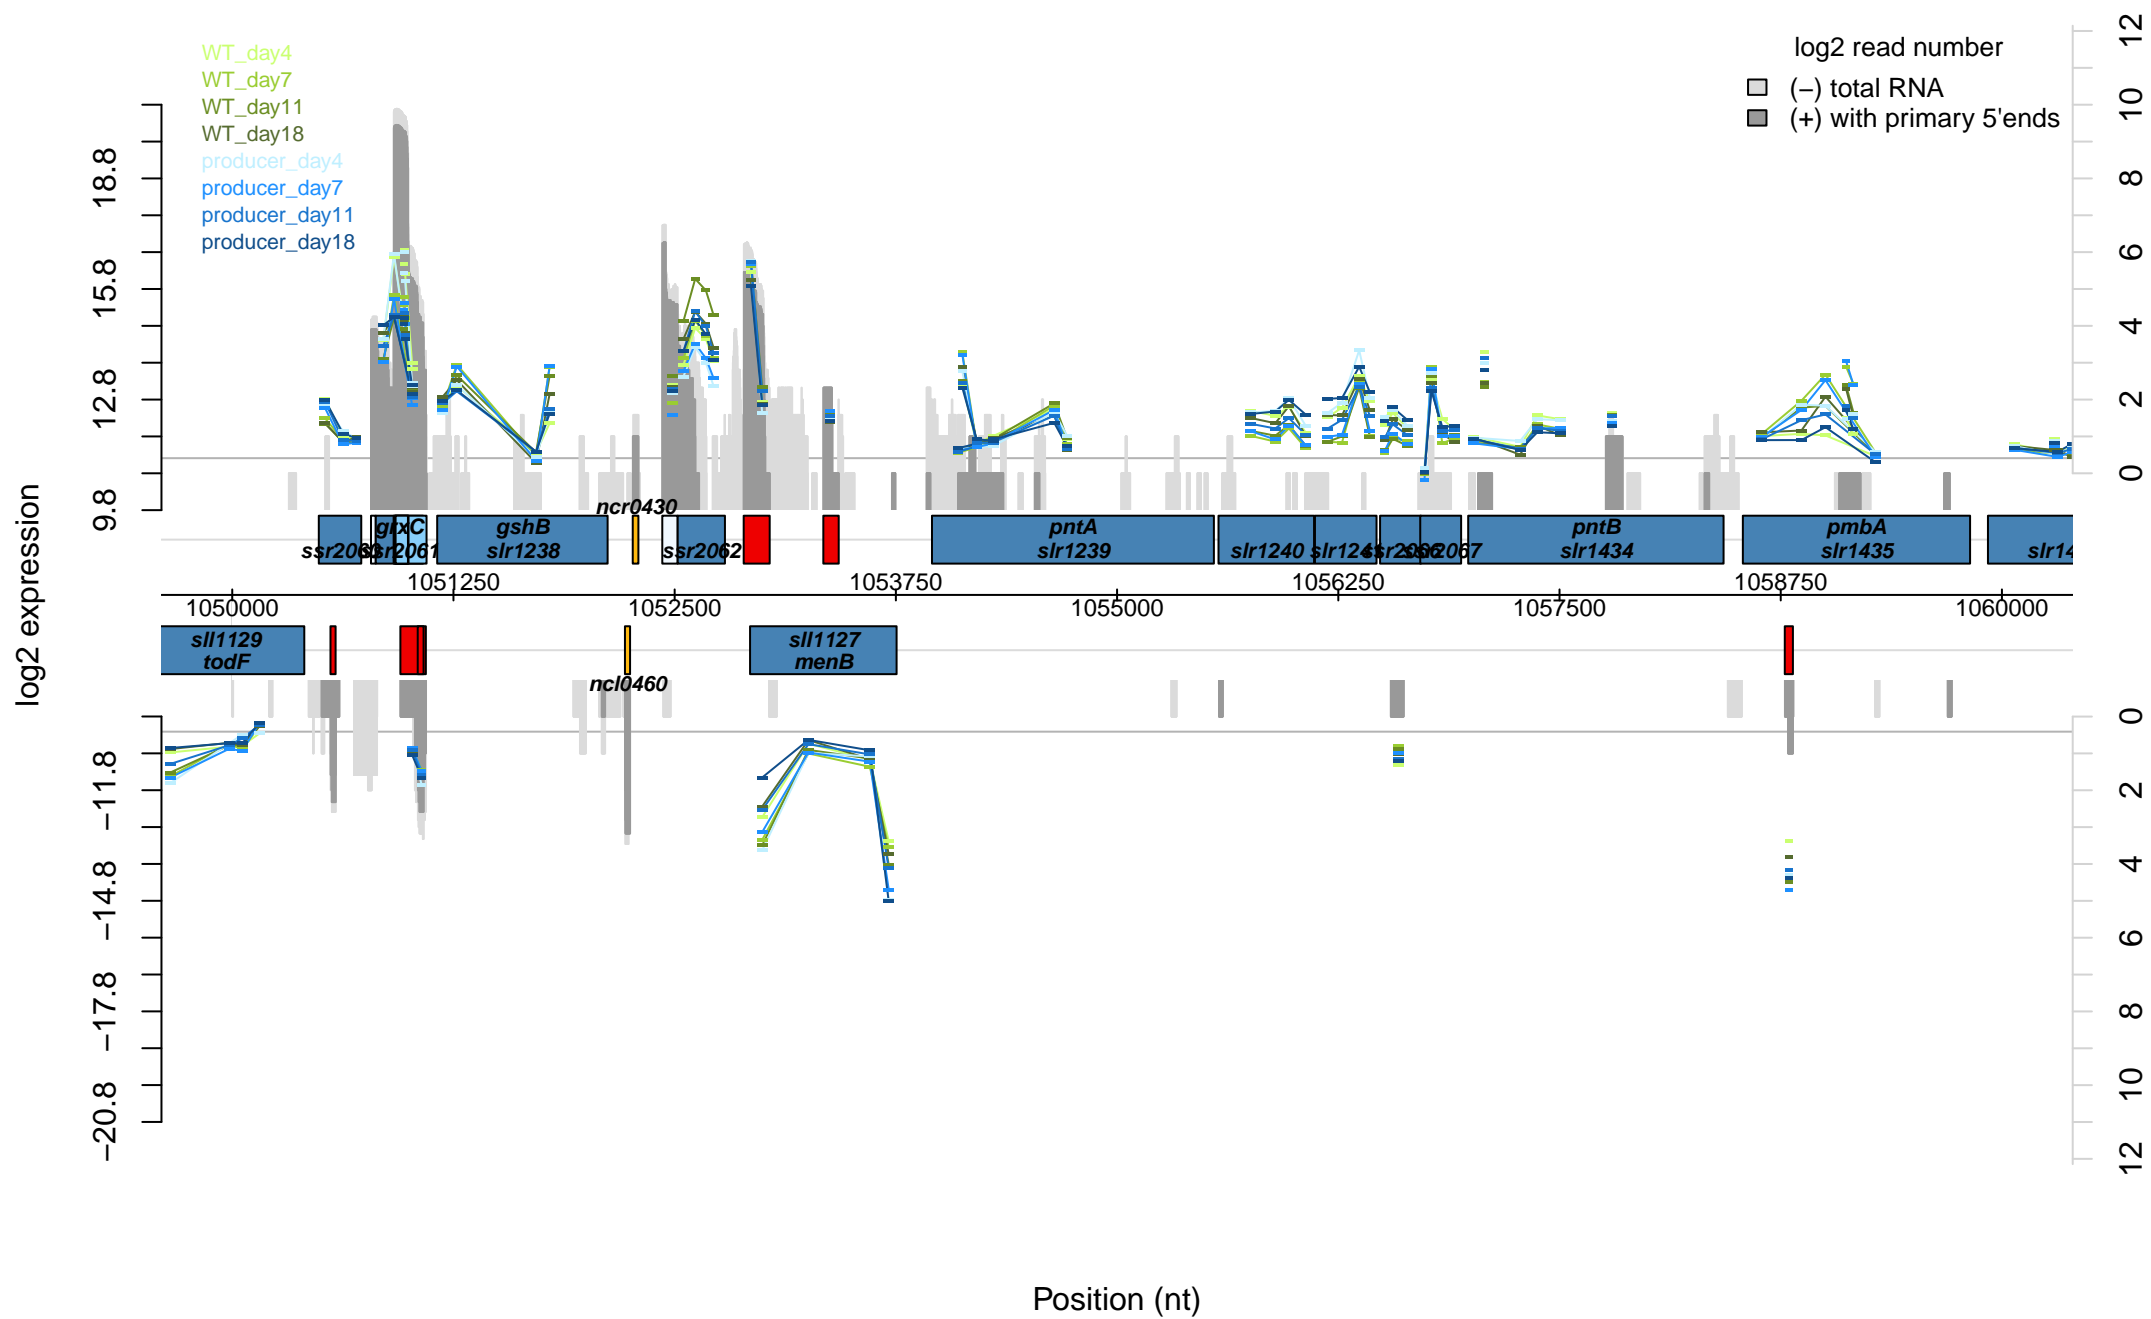

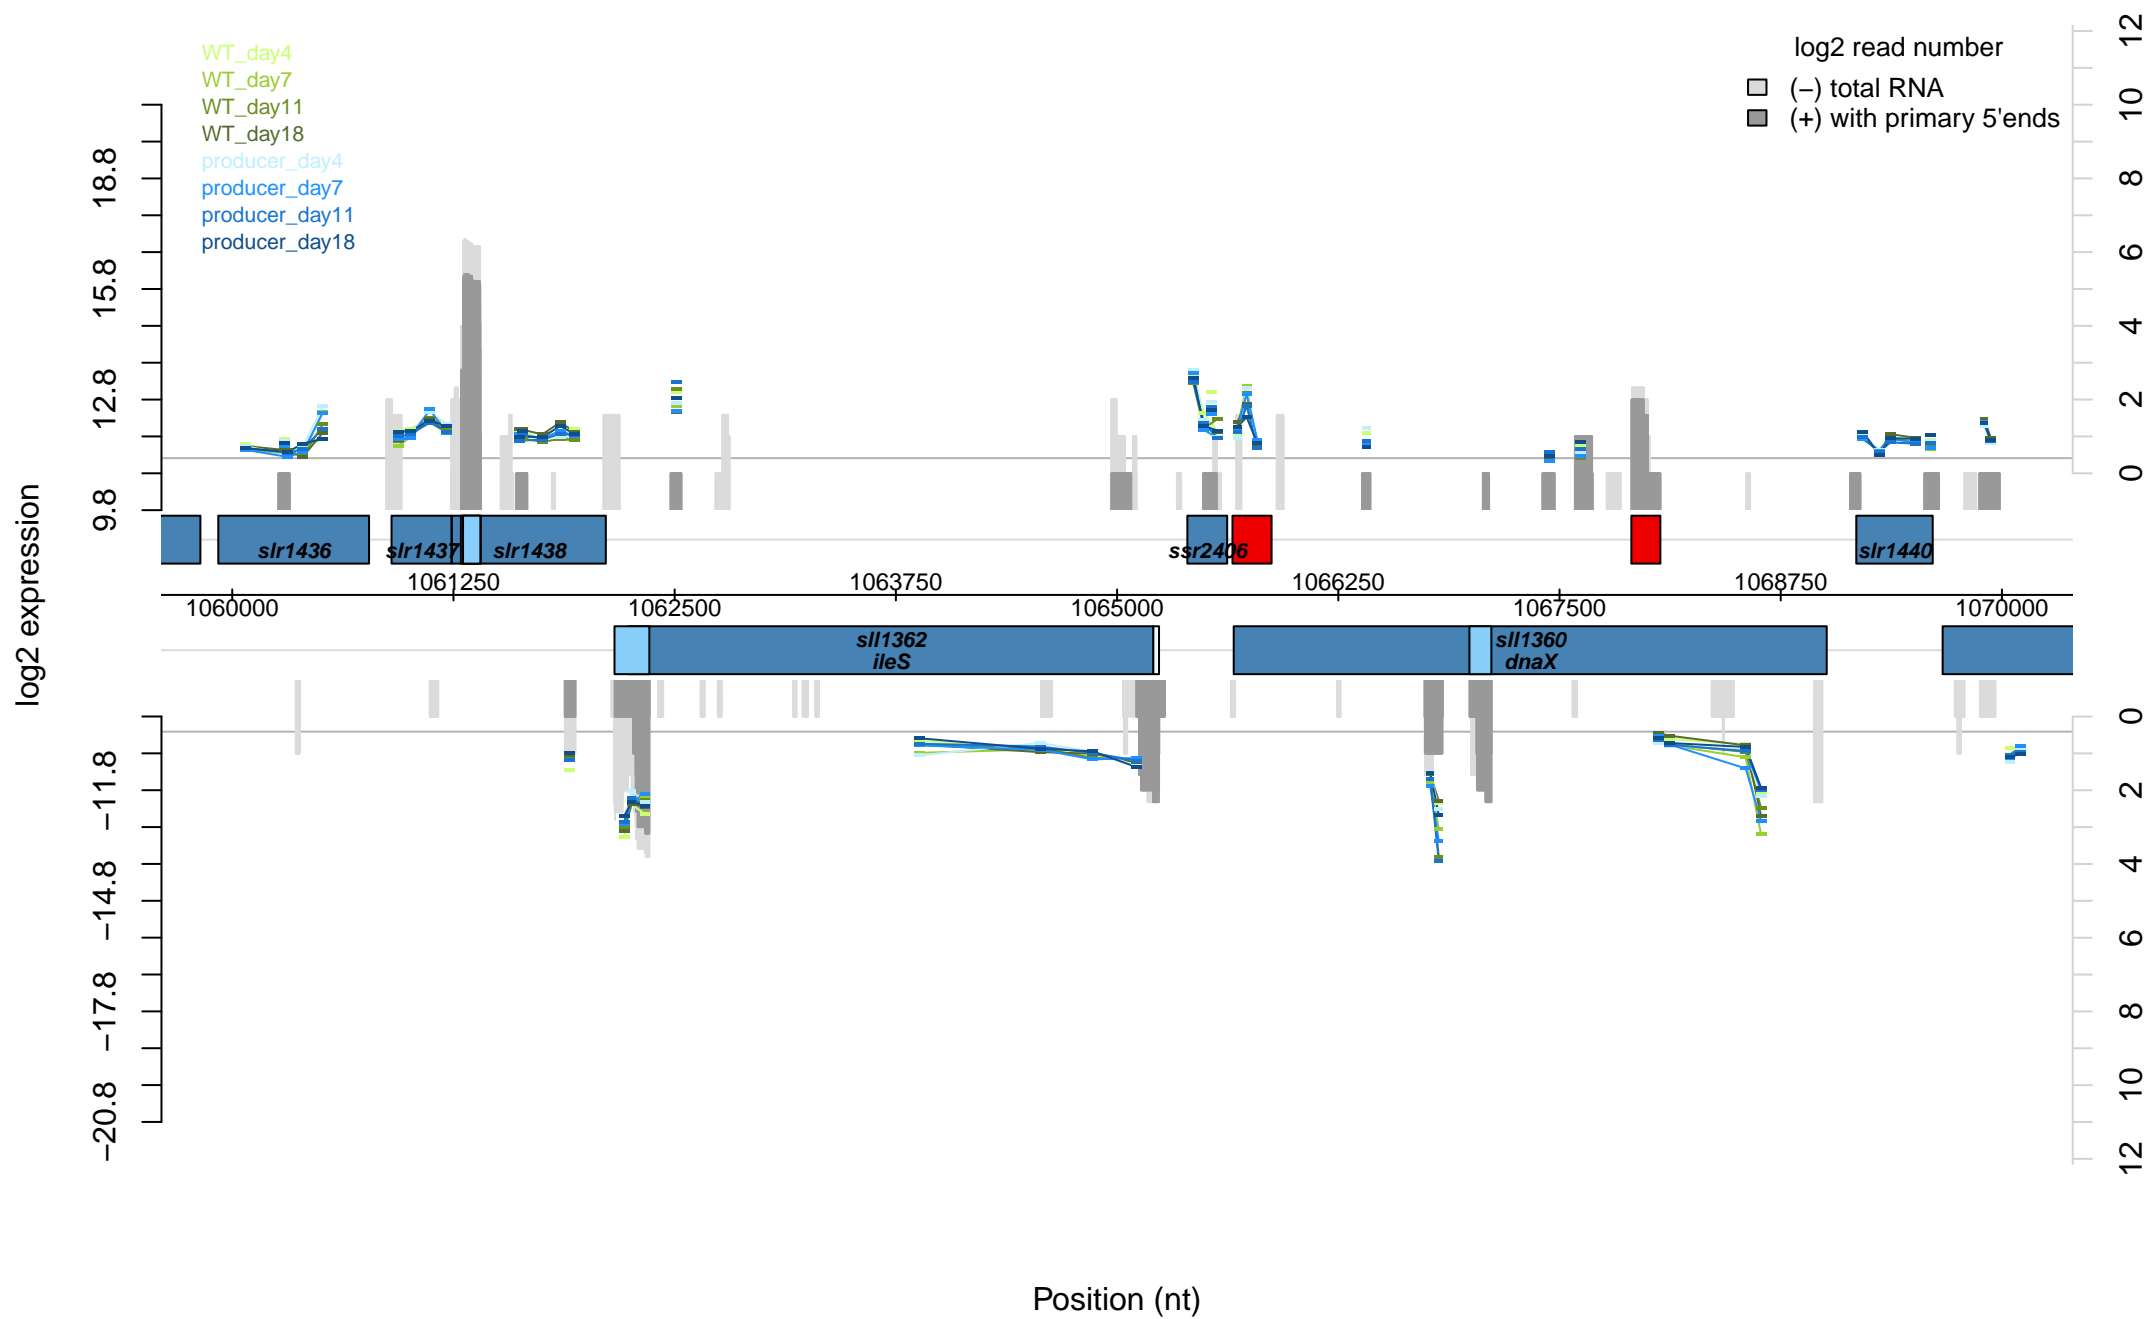

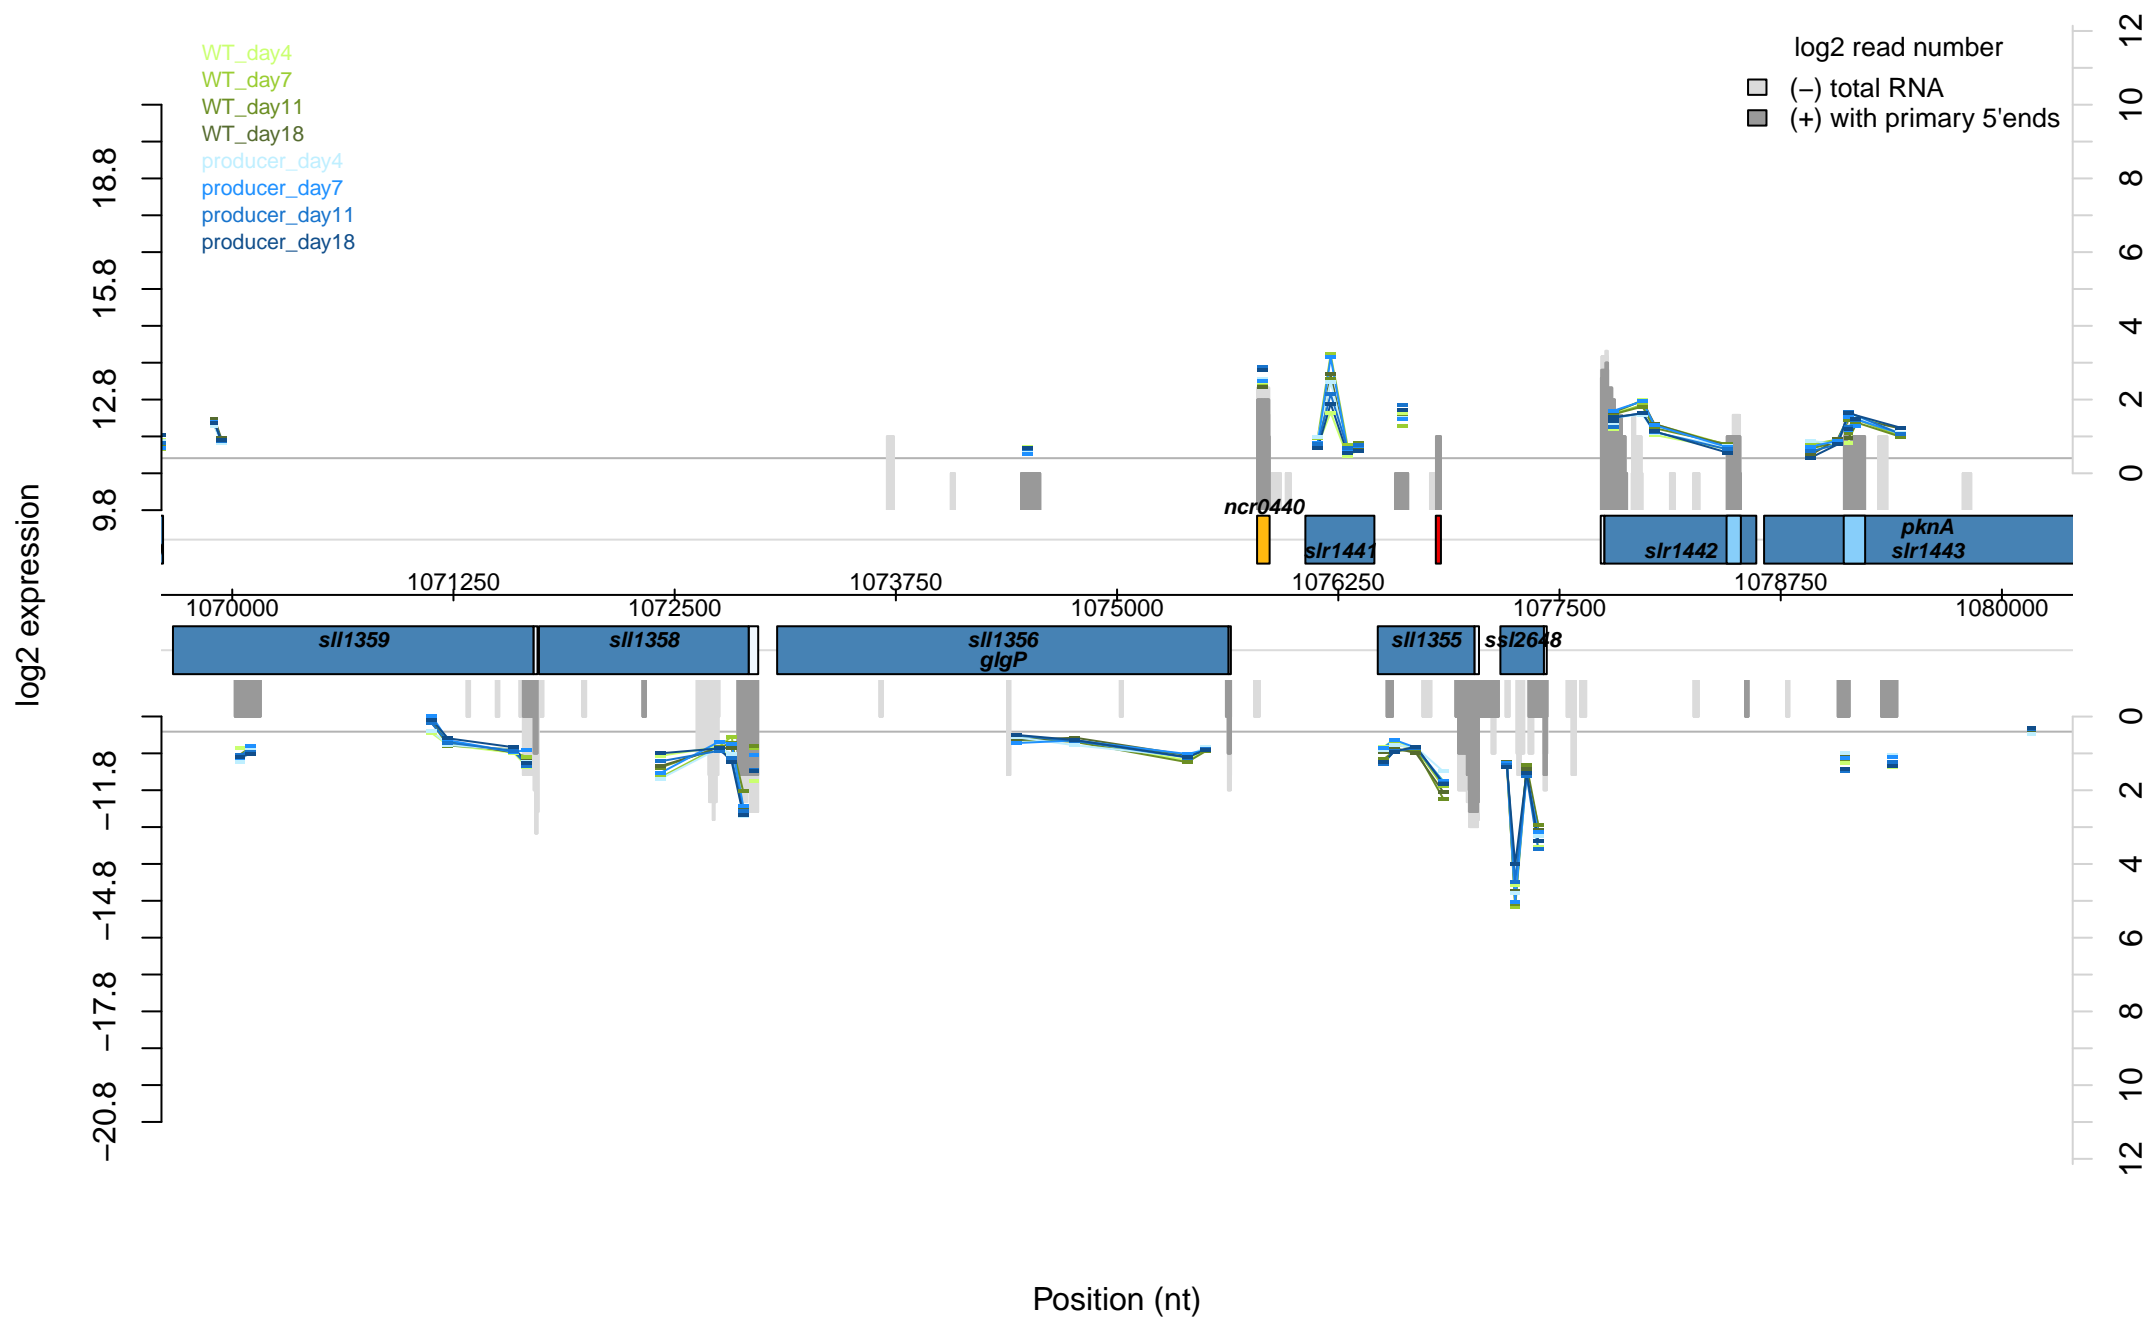



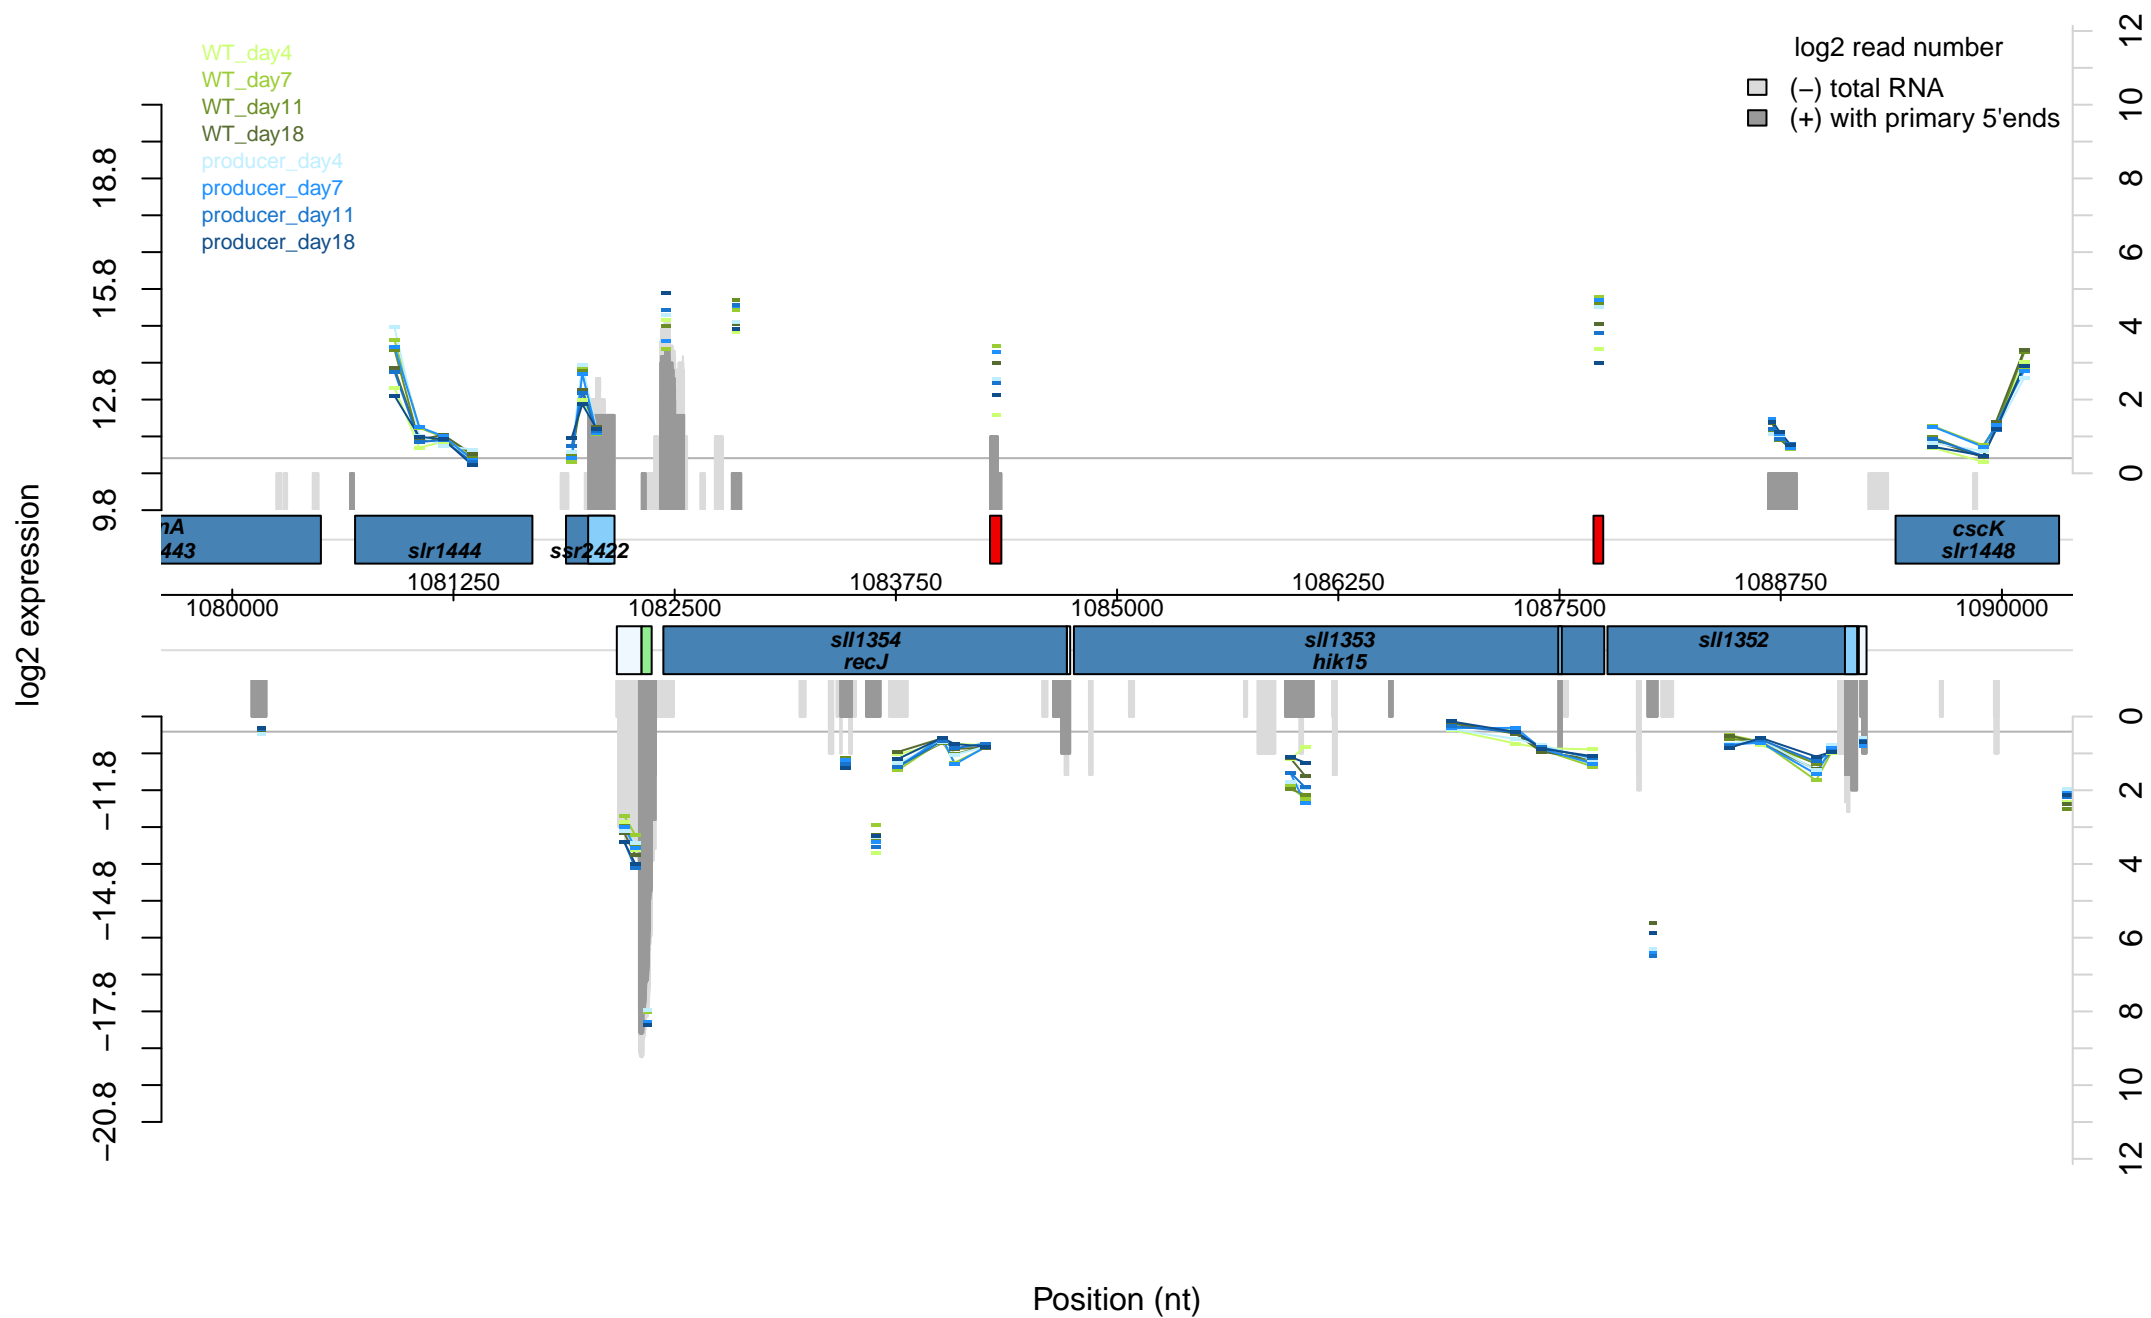

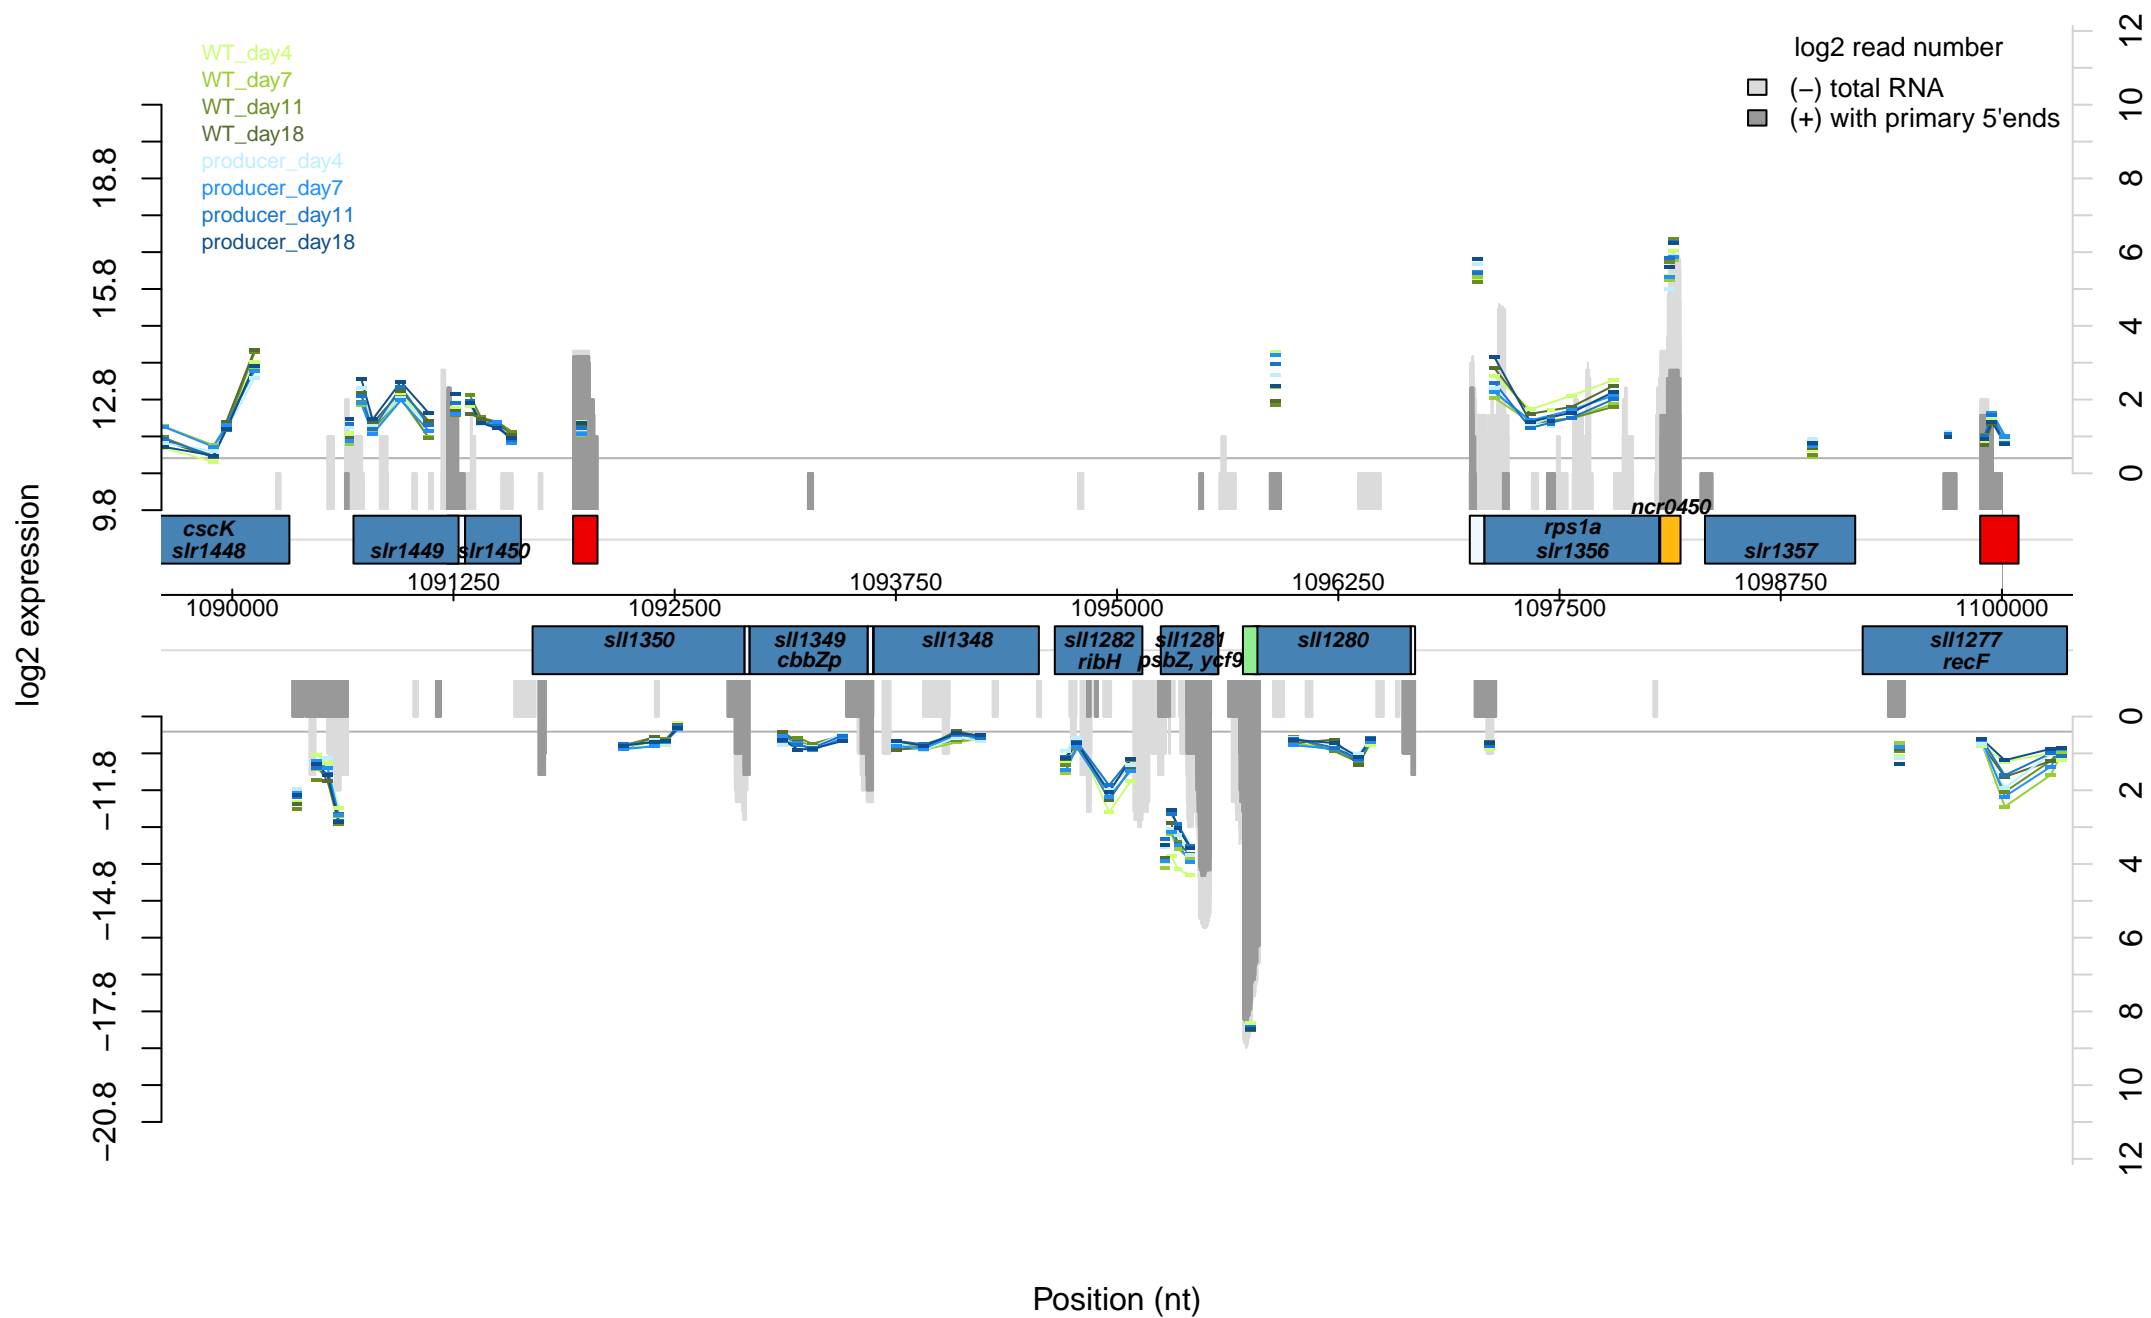

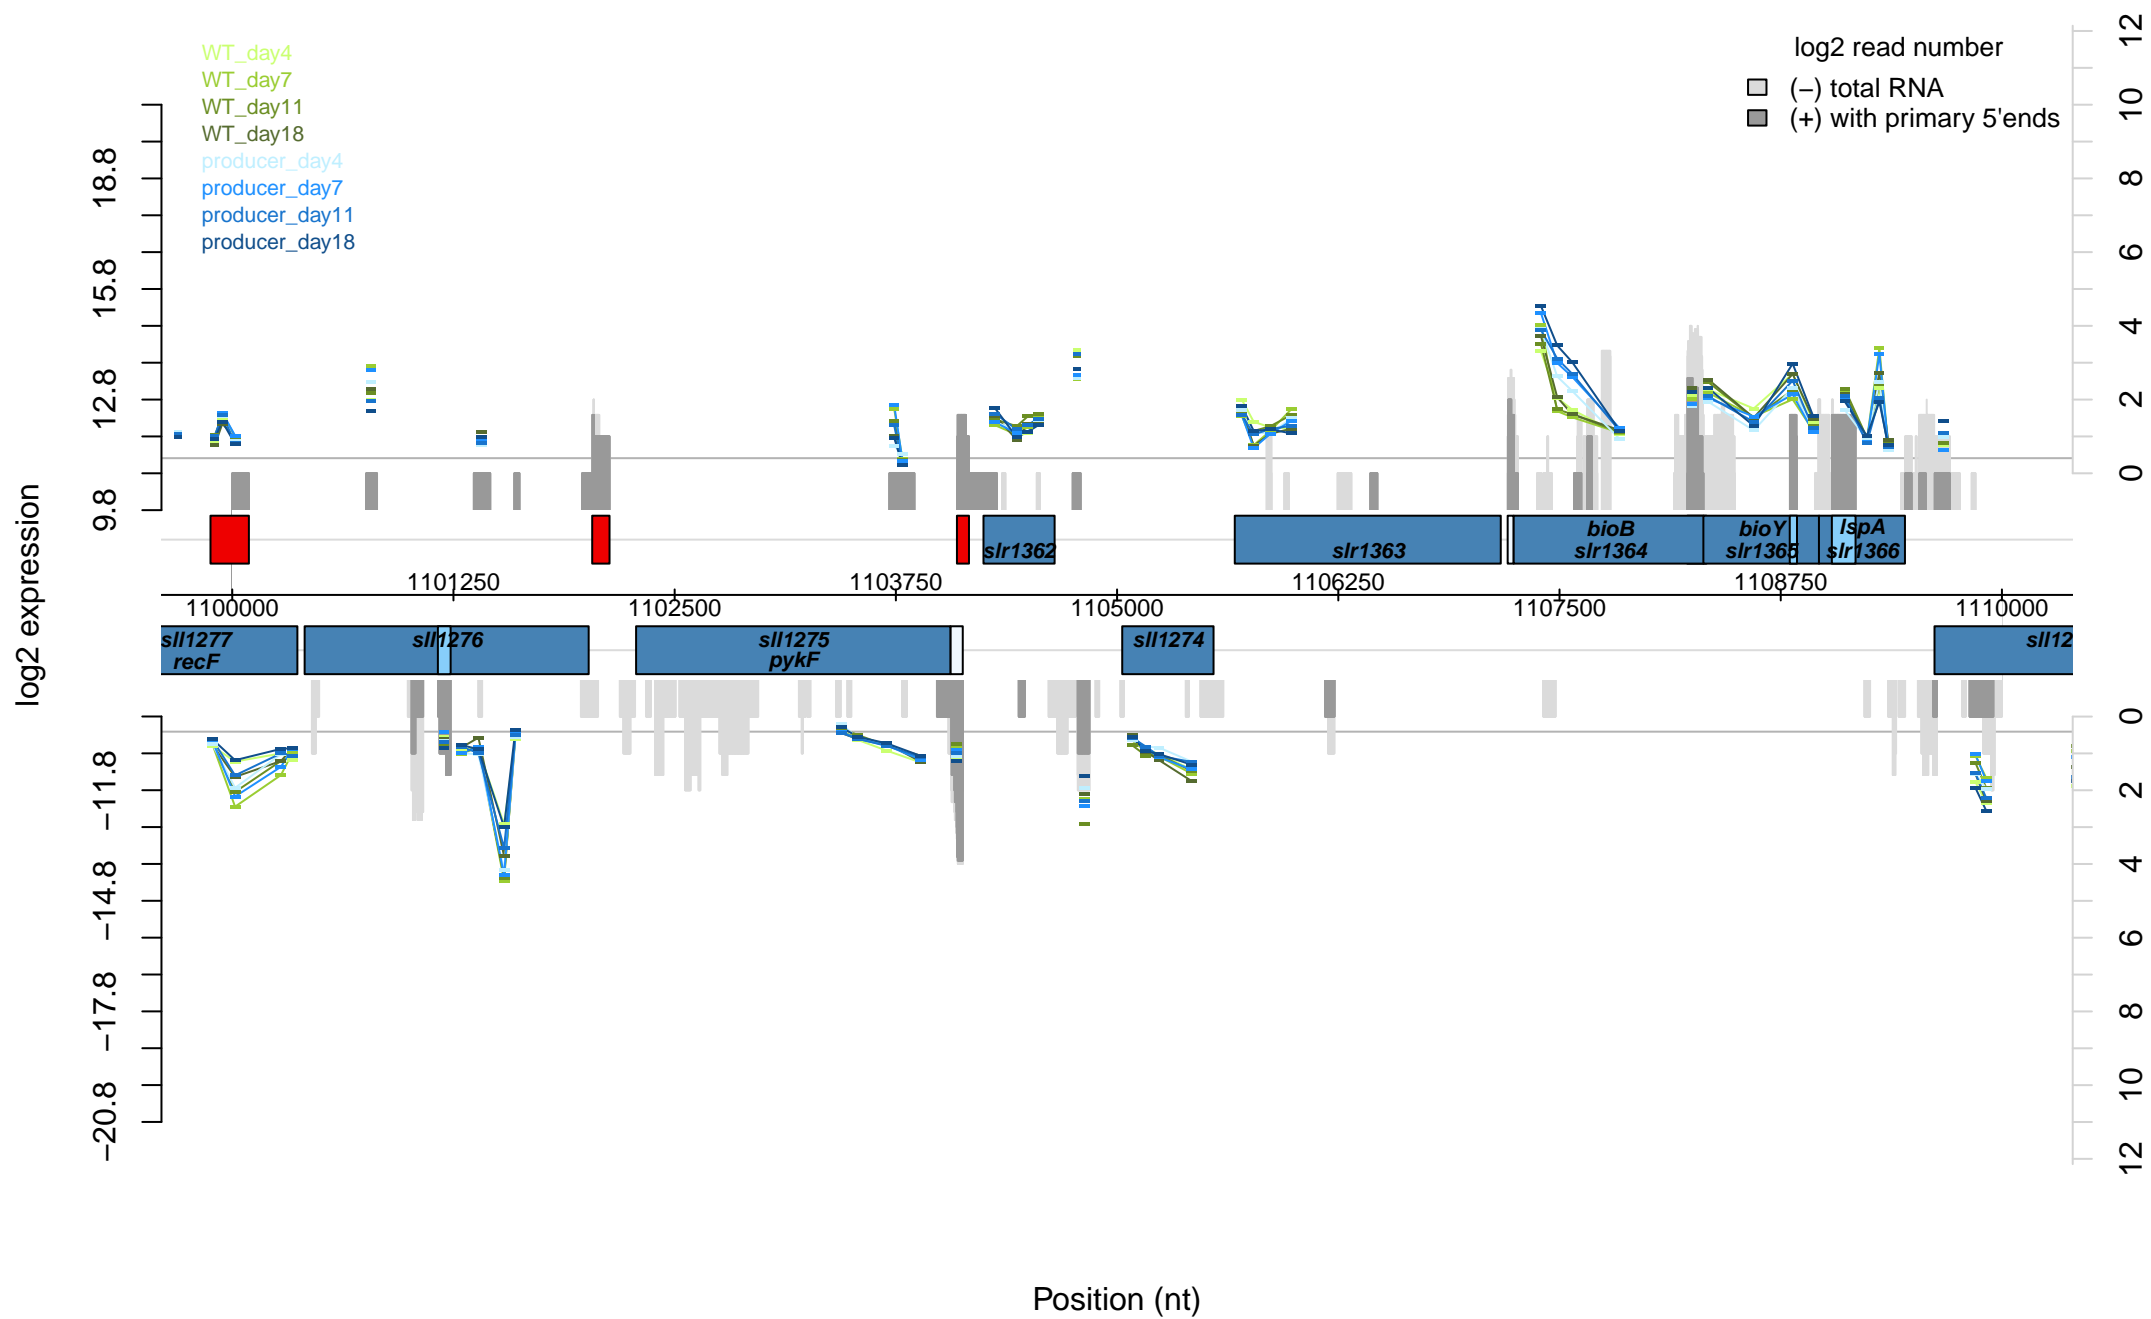

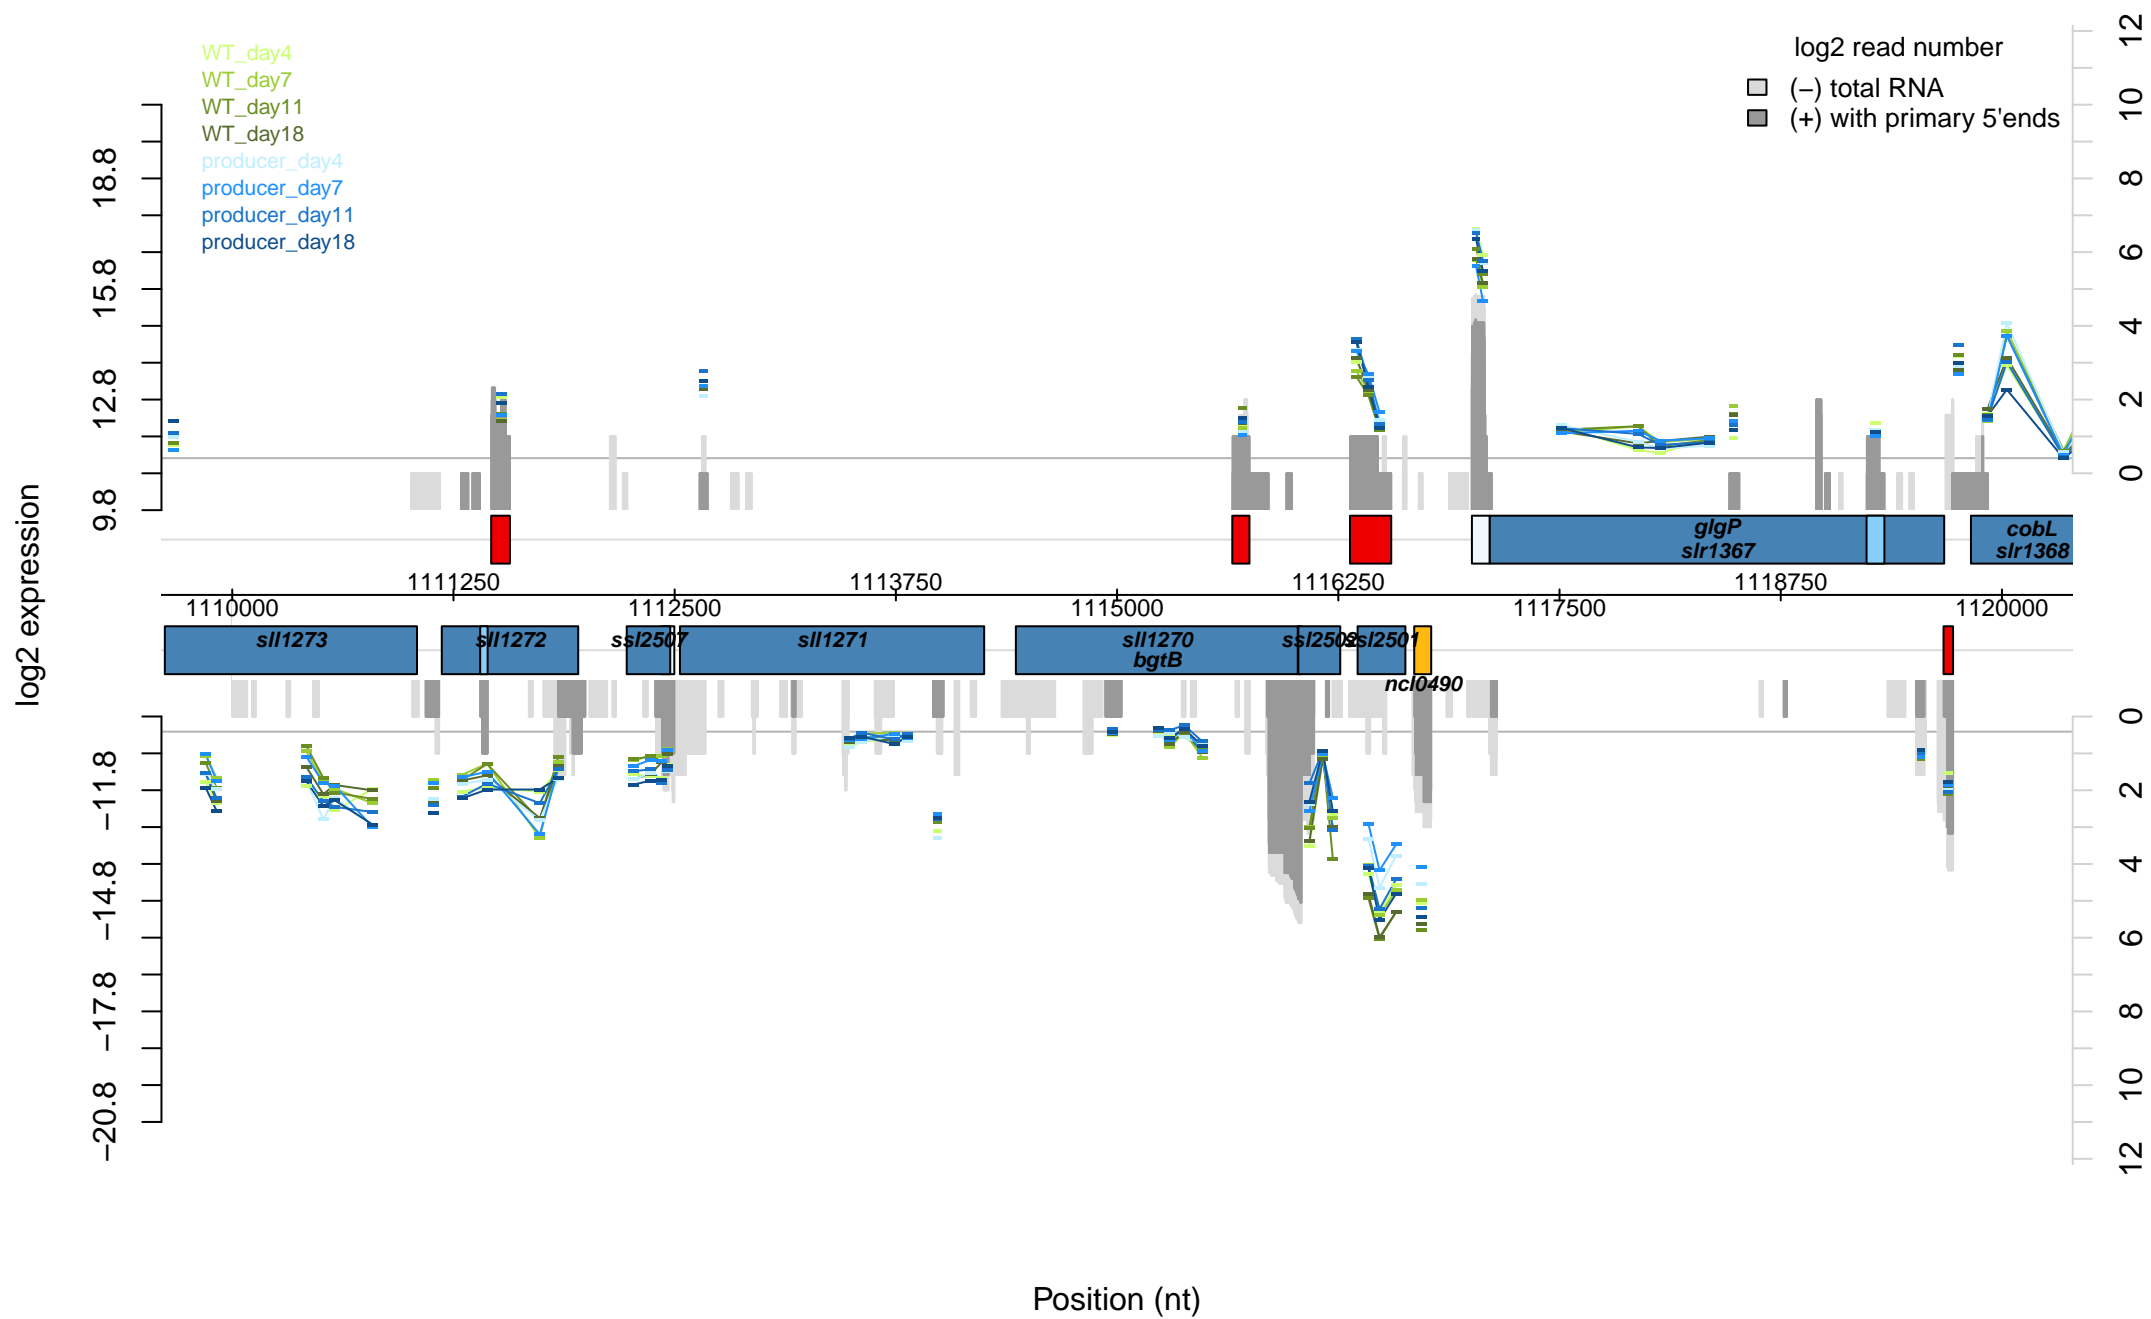

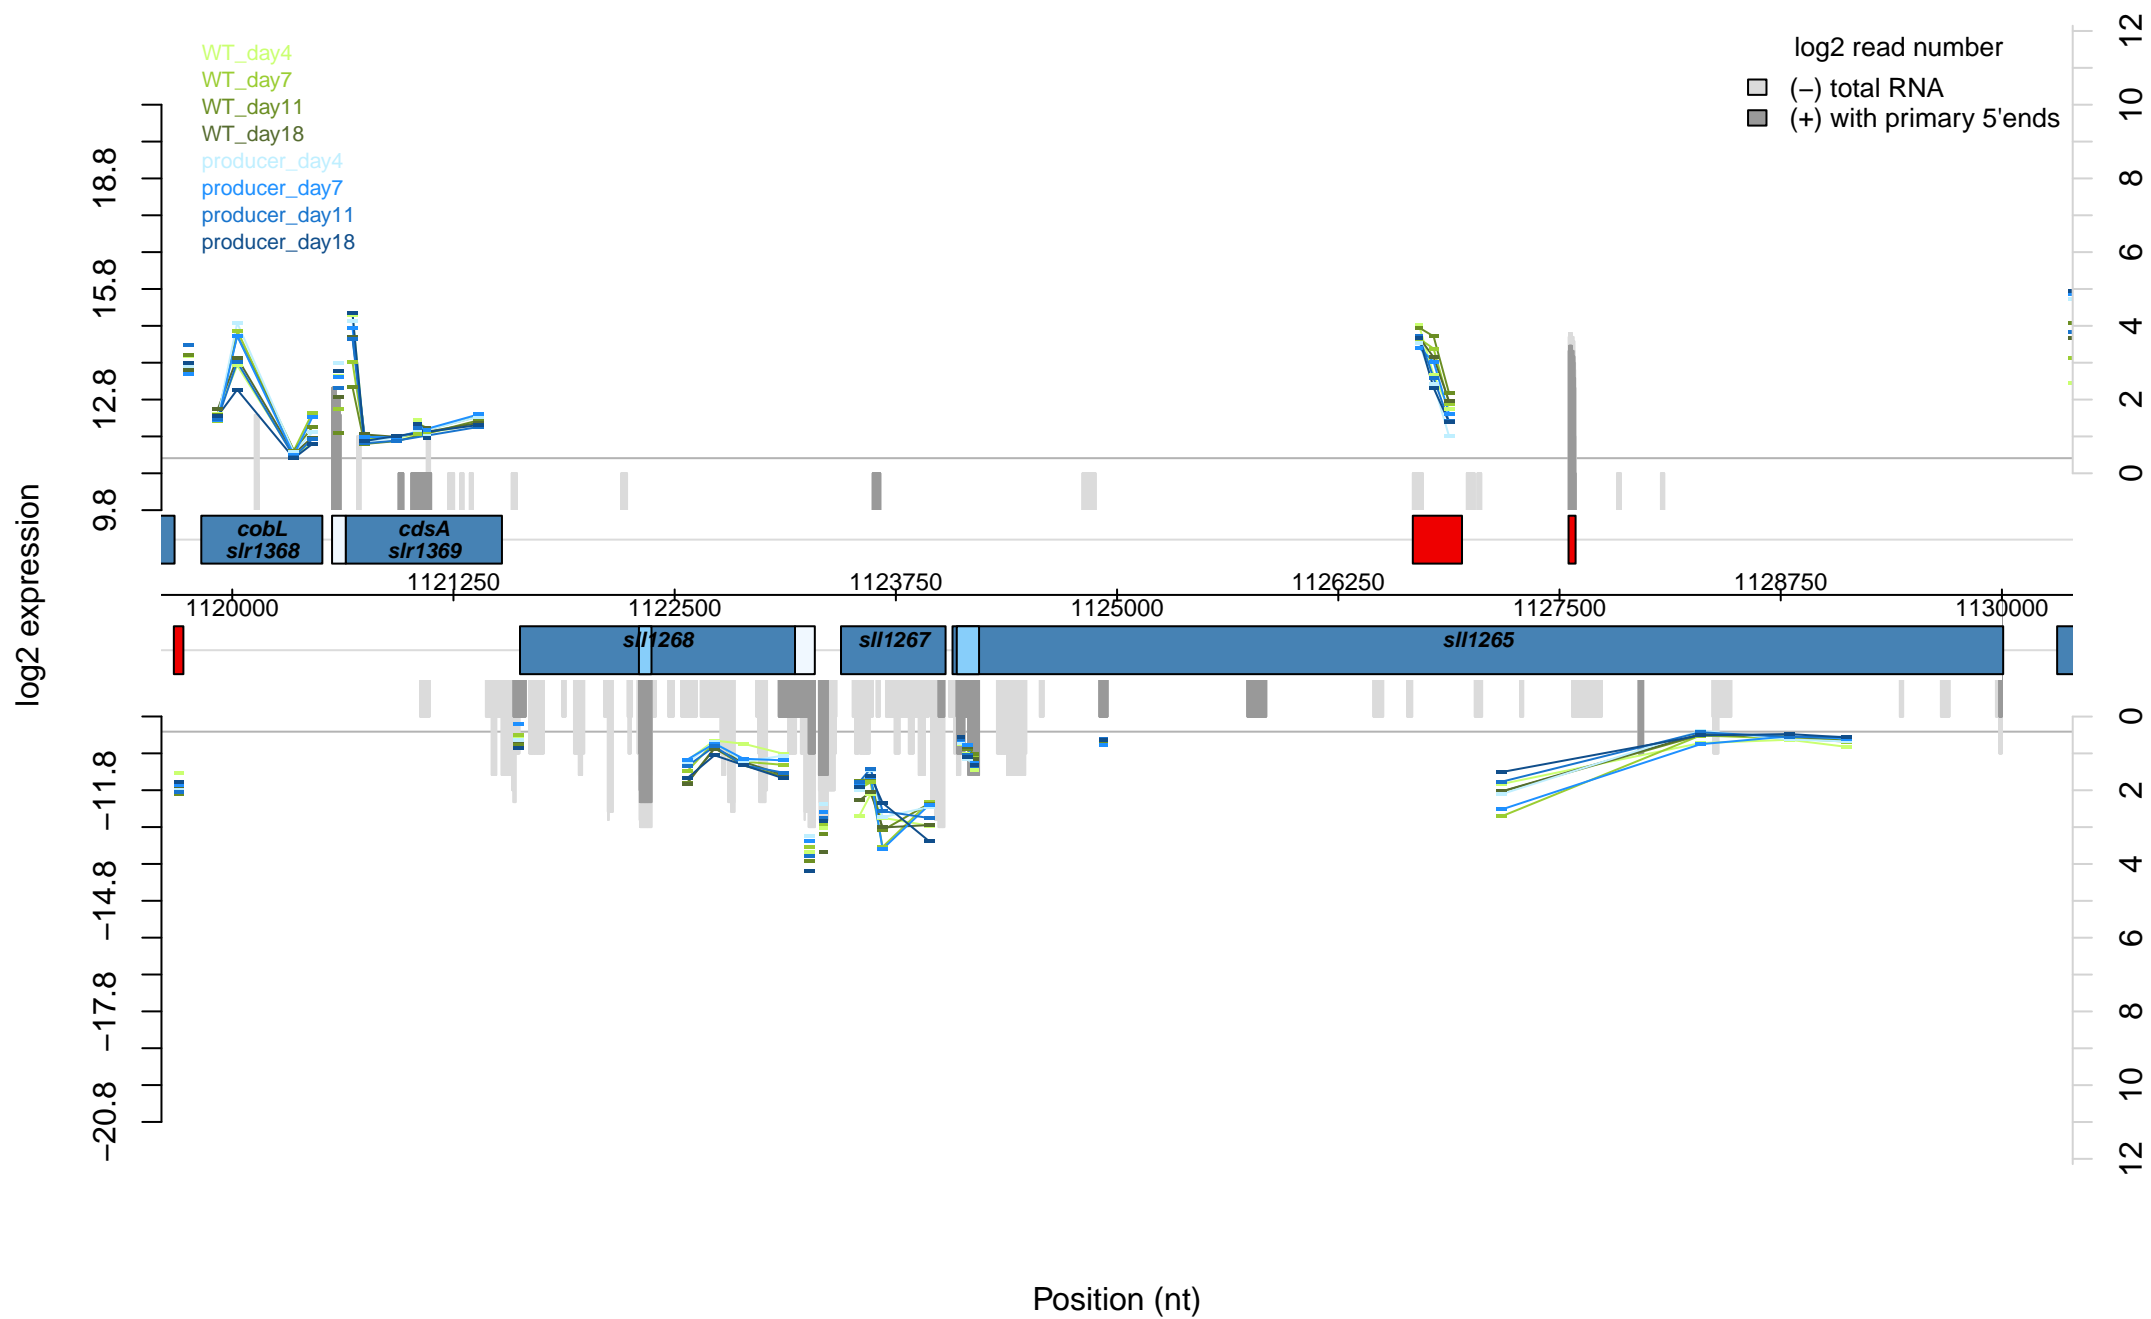

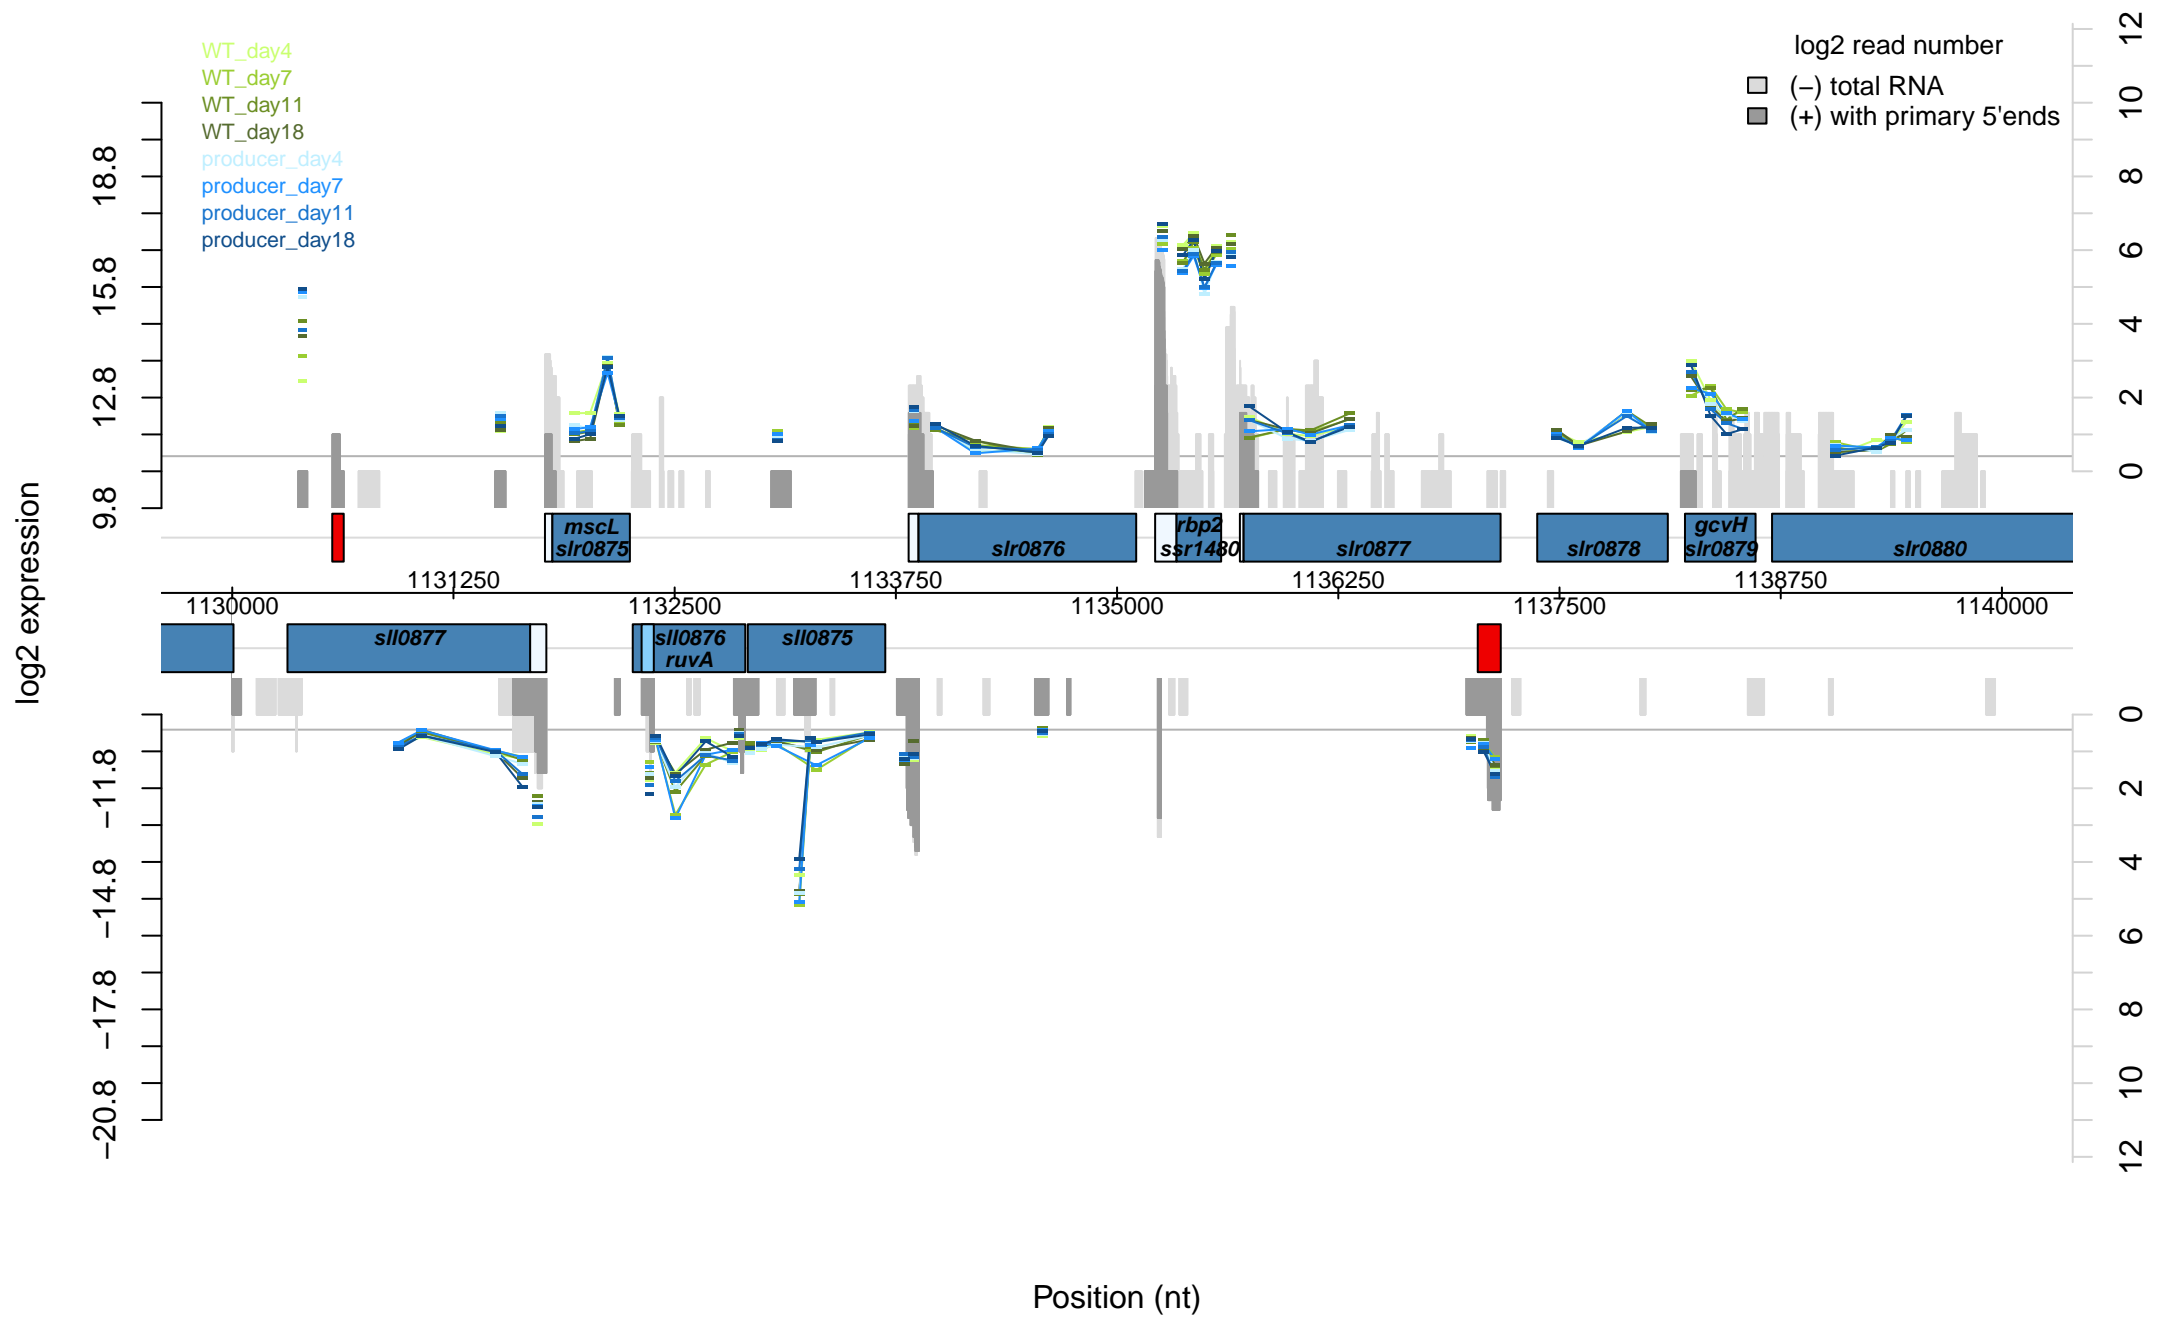

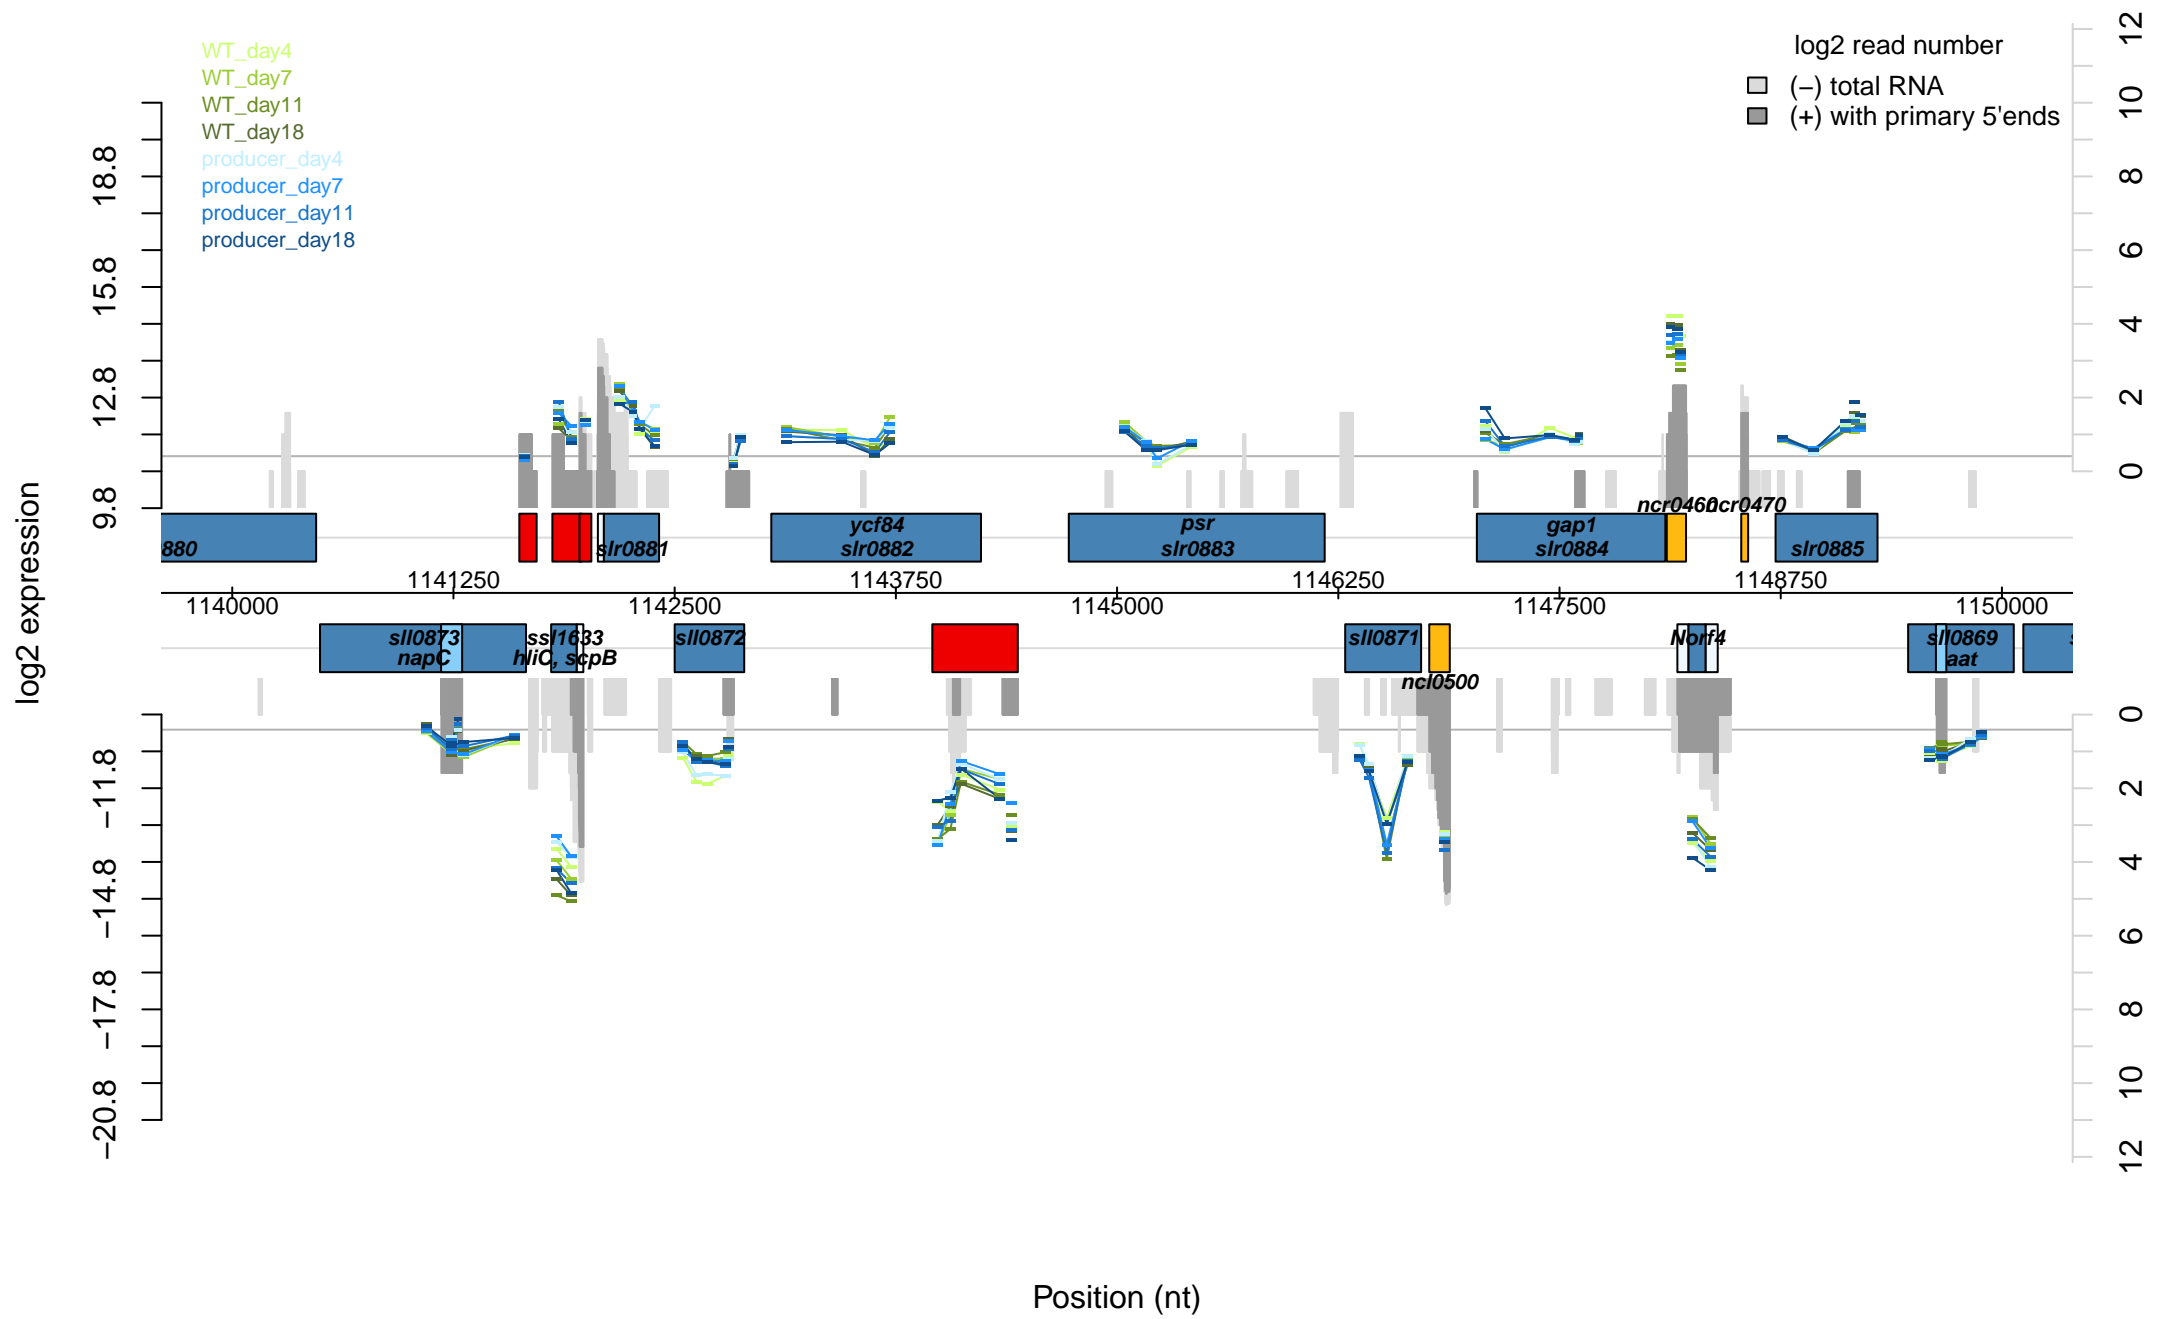

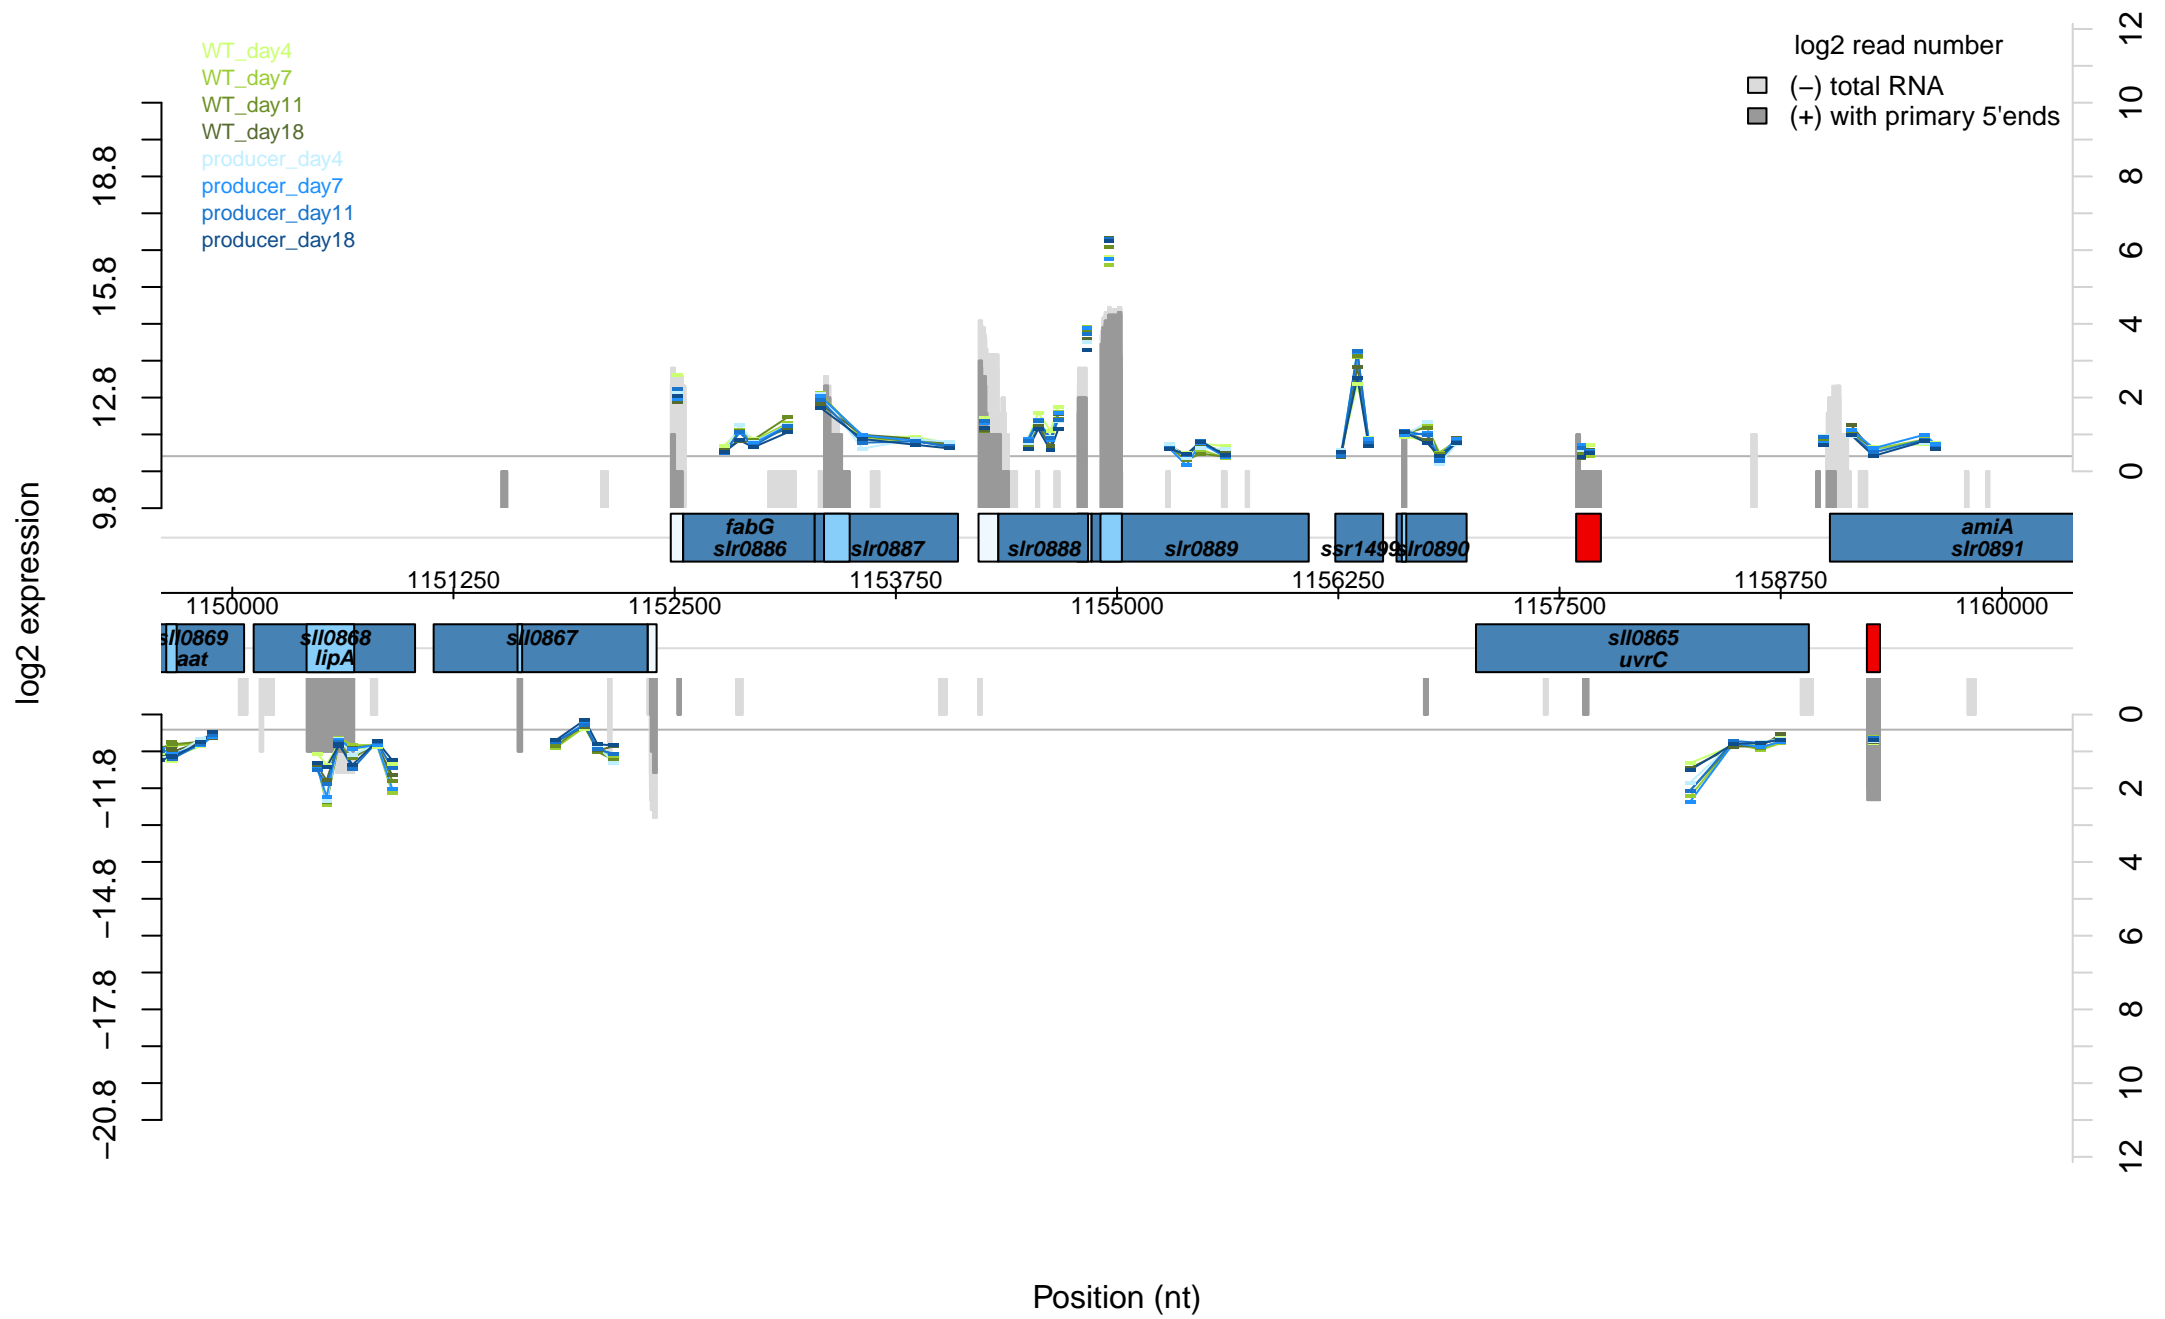

WT\_day4  
 WT\_day7  
 WT\_day11  
 WT\_day18  
 producer\_day4  
 producer\_day7  
 producer\_day11  
 producer\_day18

log2 read number  
 (-) total RNA  
 (+) with primary 5'ends

log<sub>2</sub> expression

Position (nt)





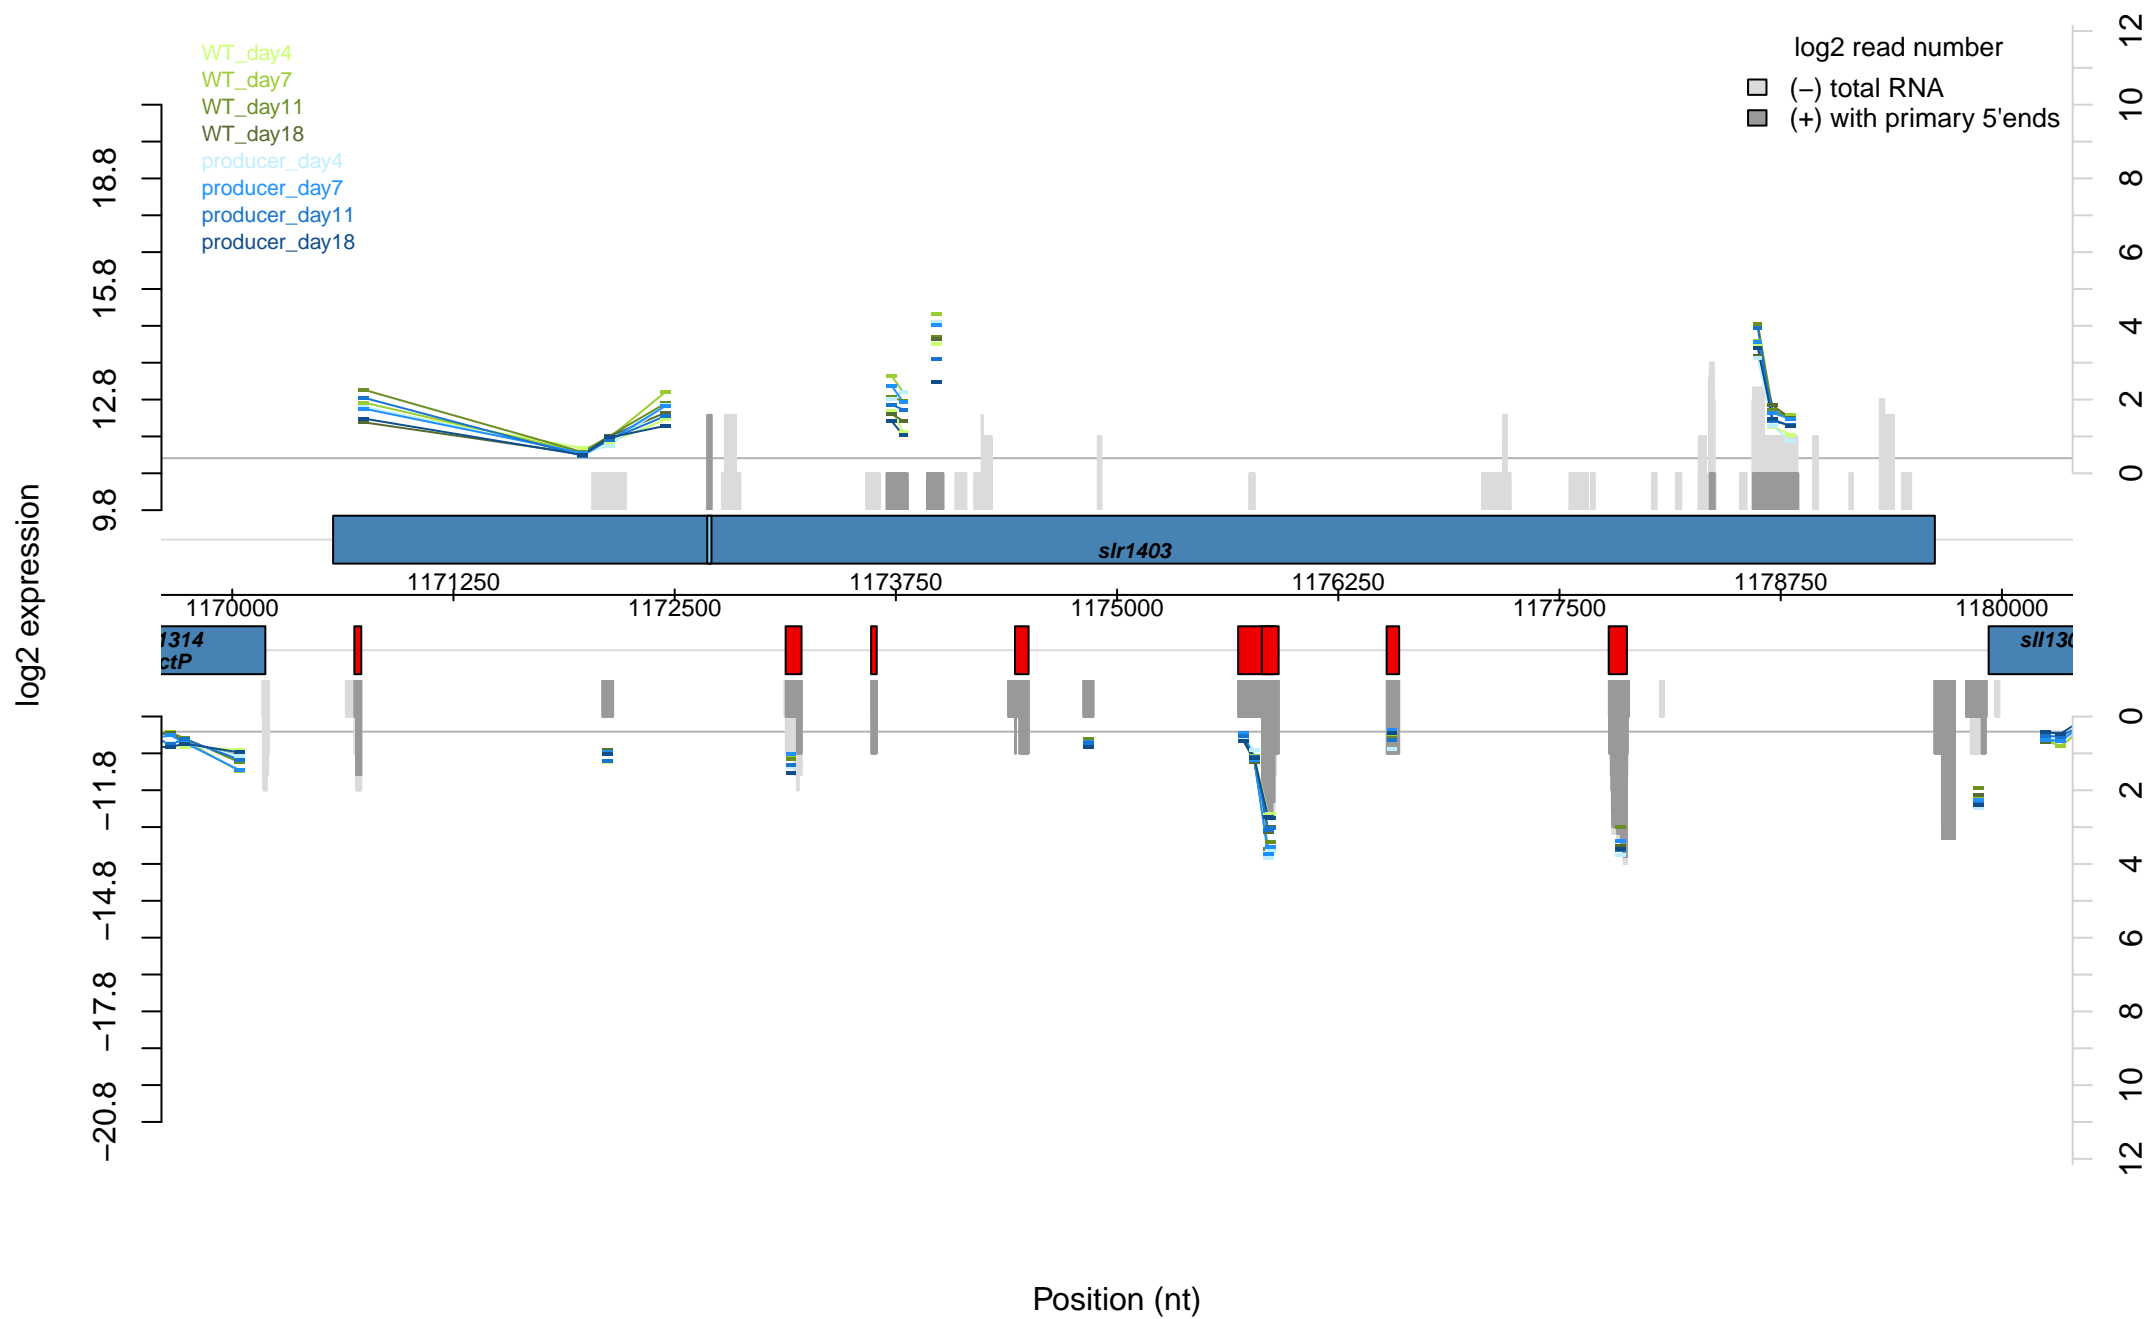

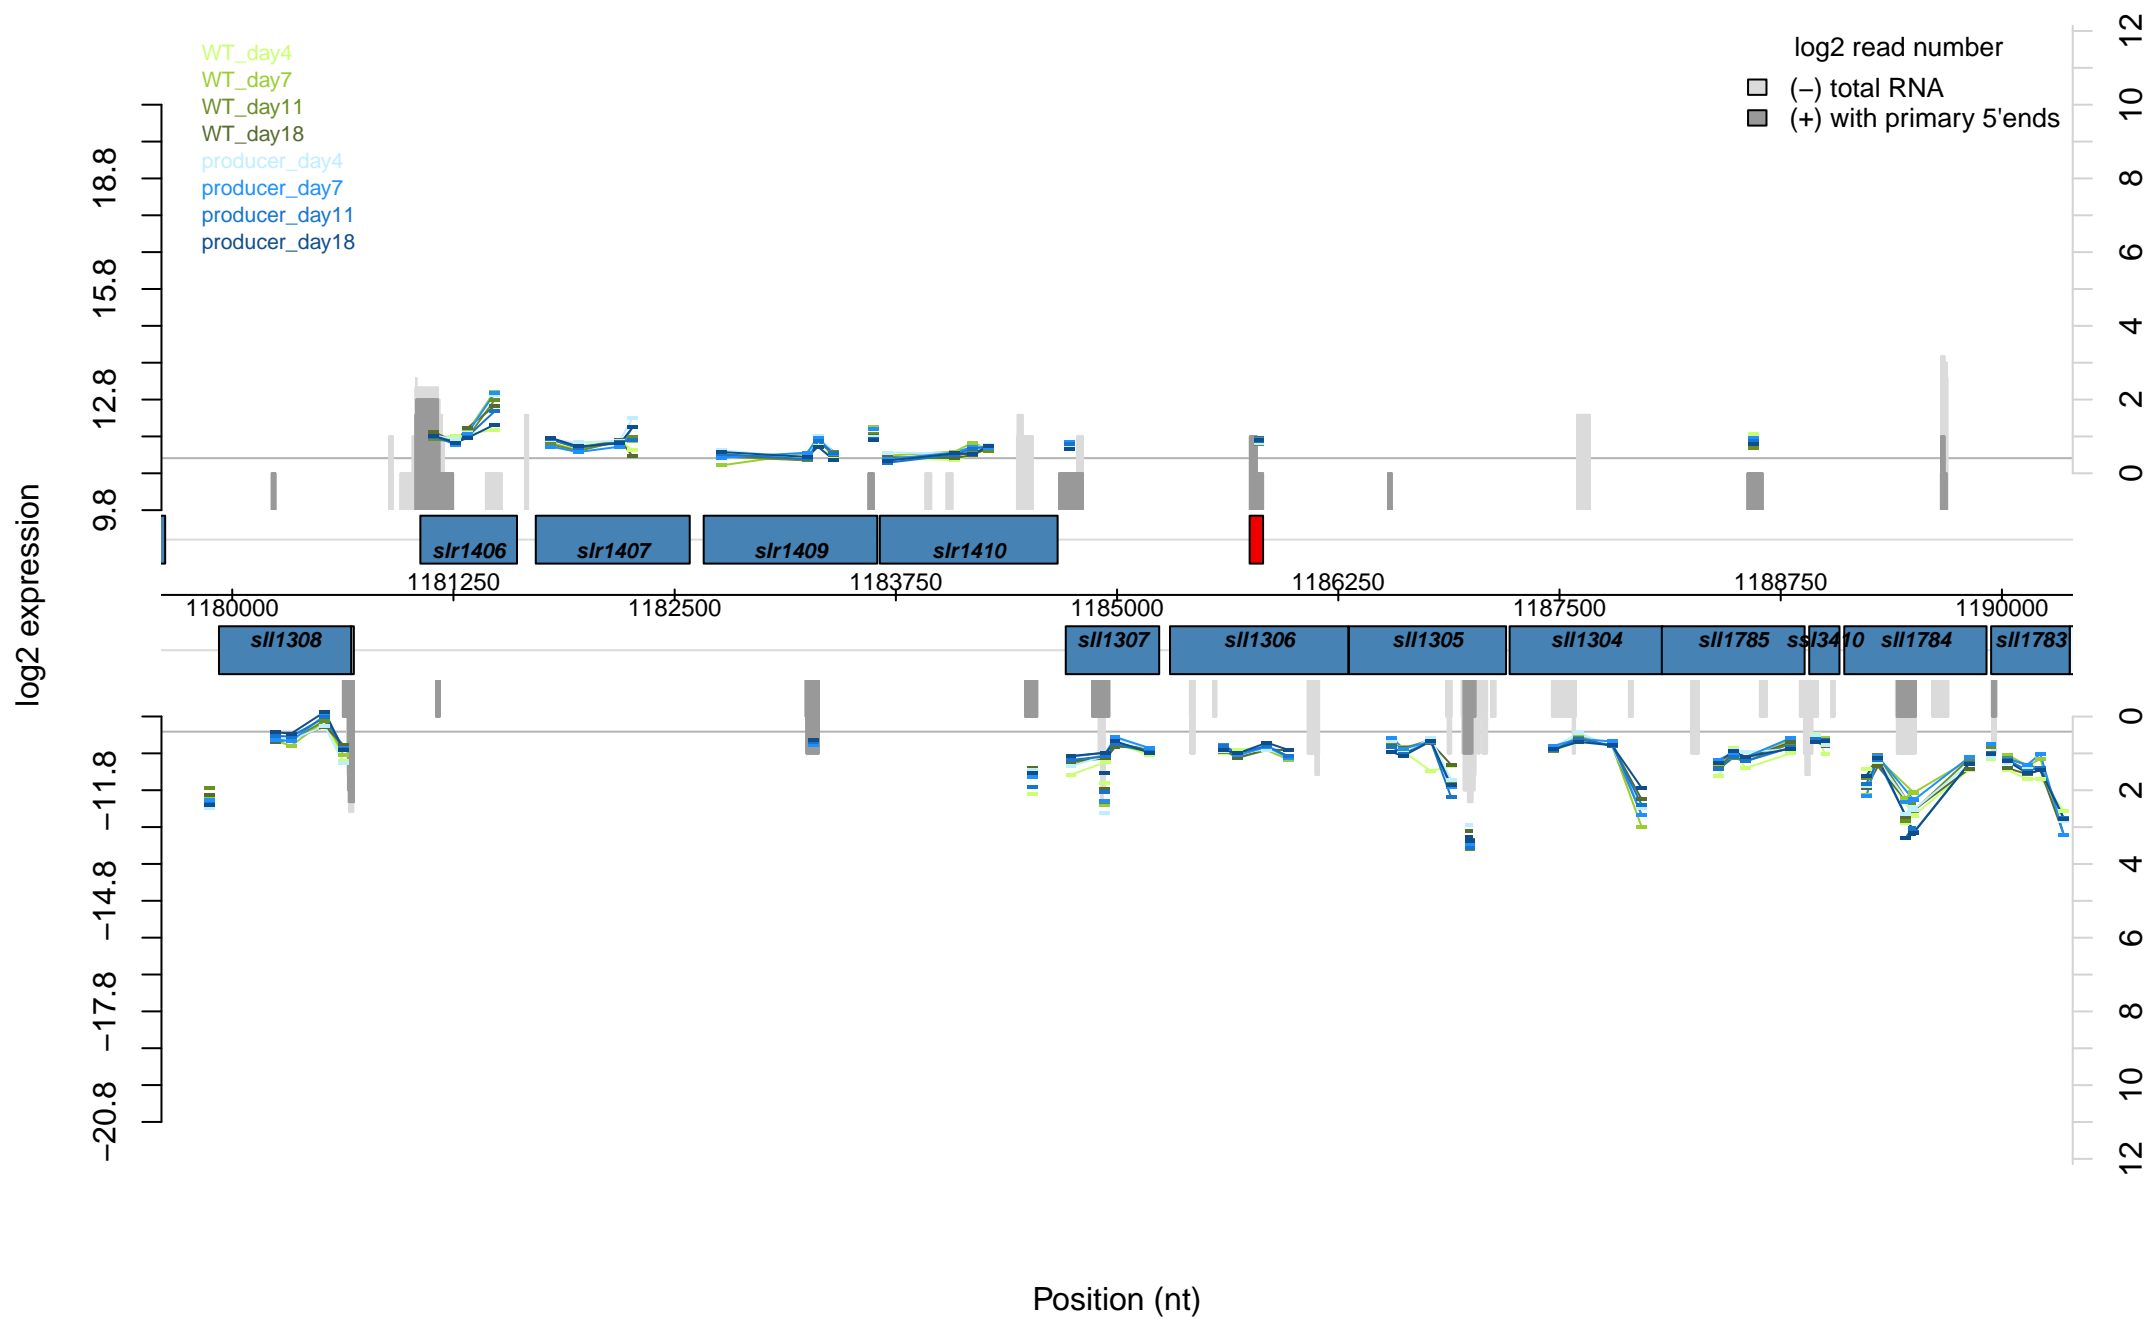

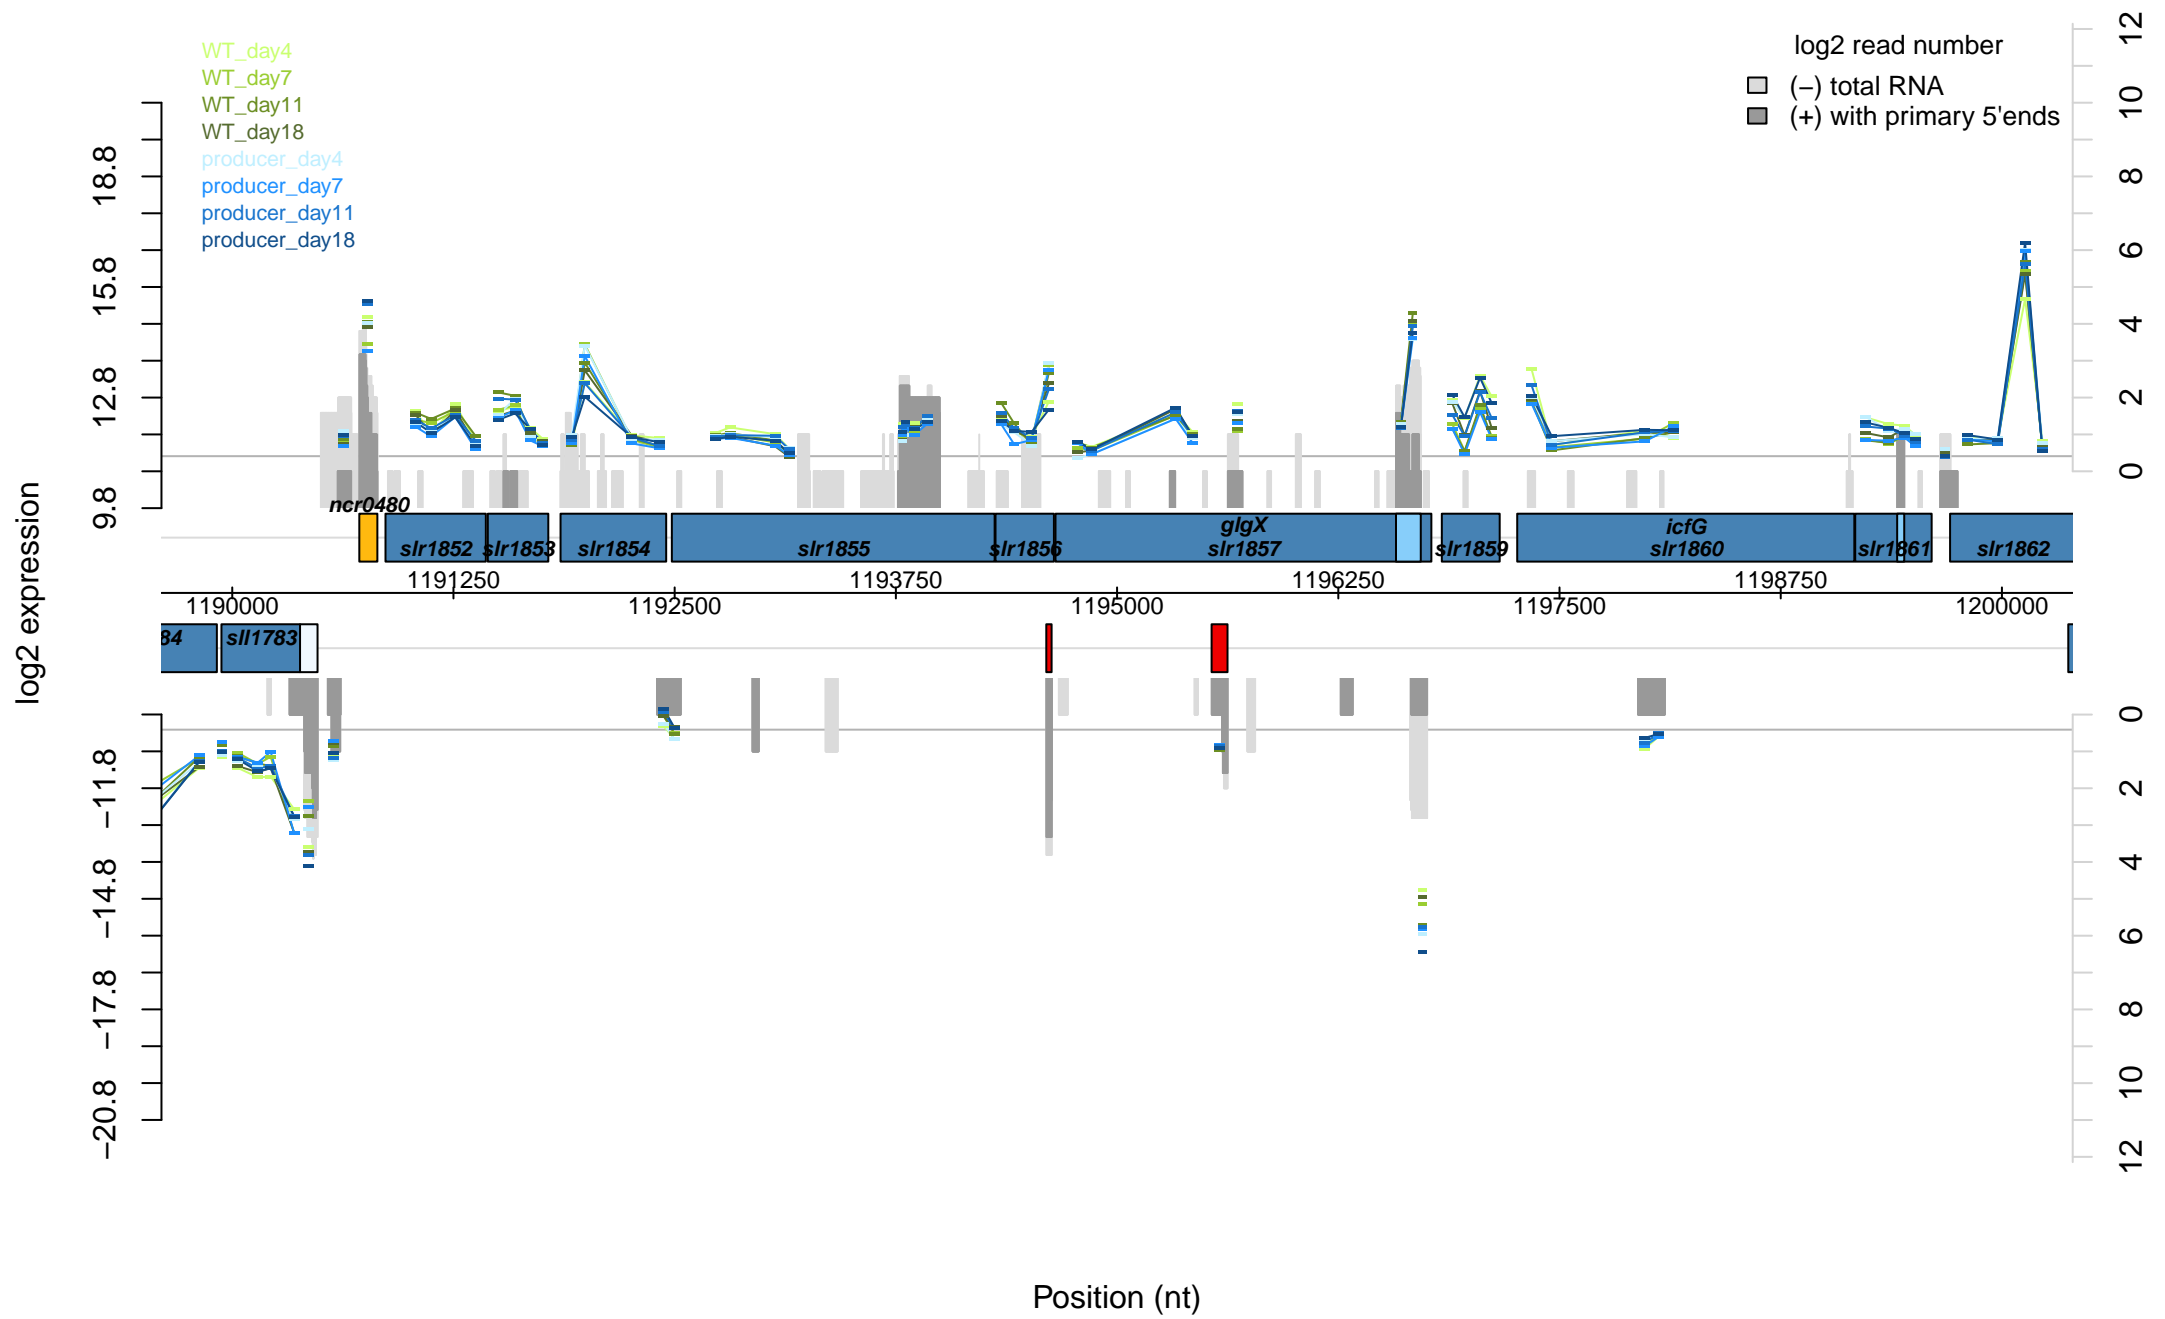

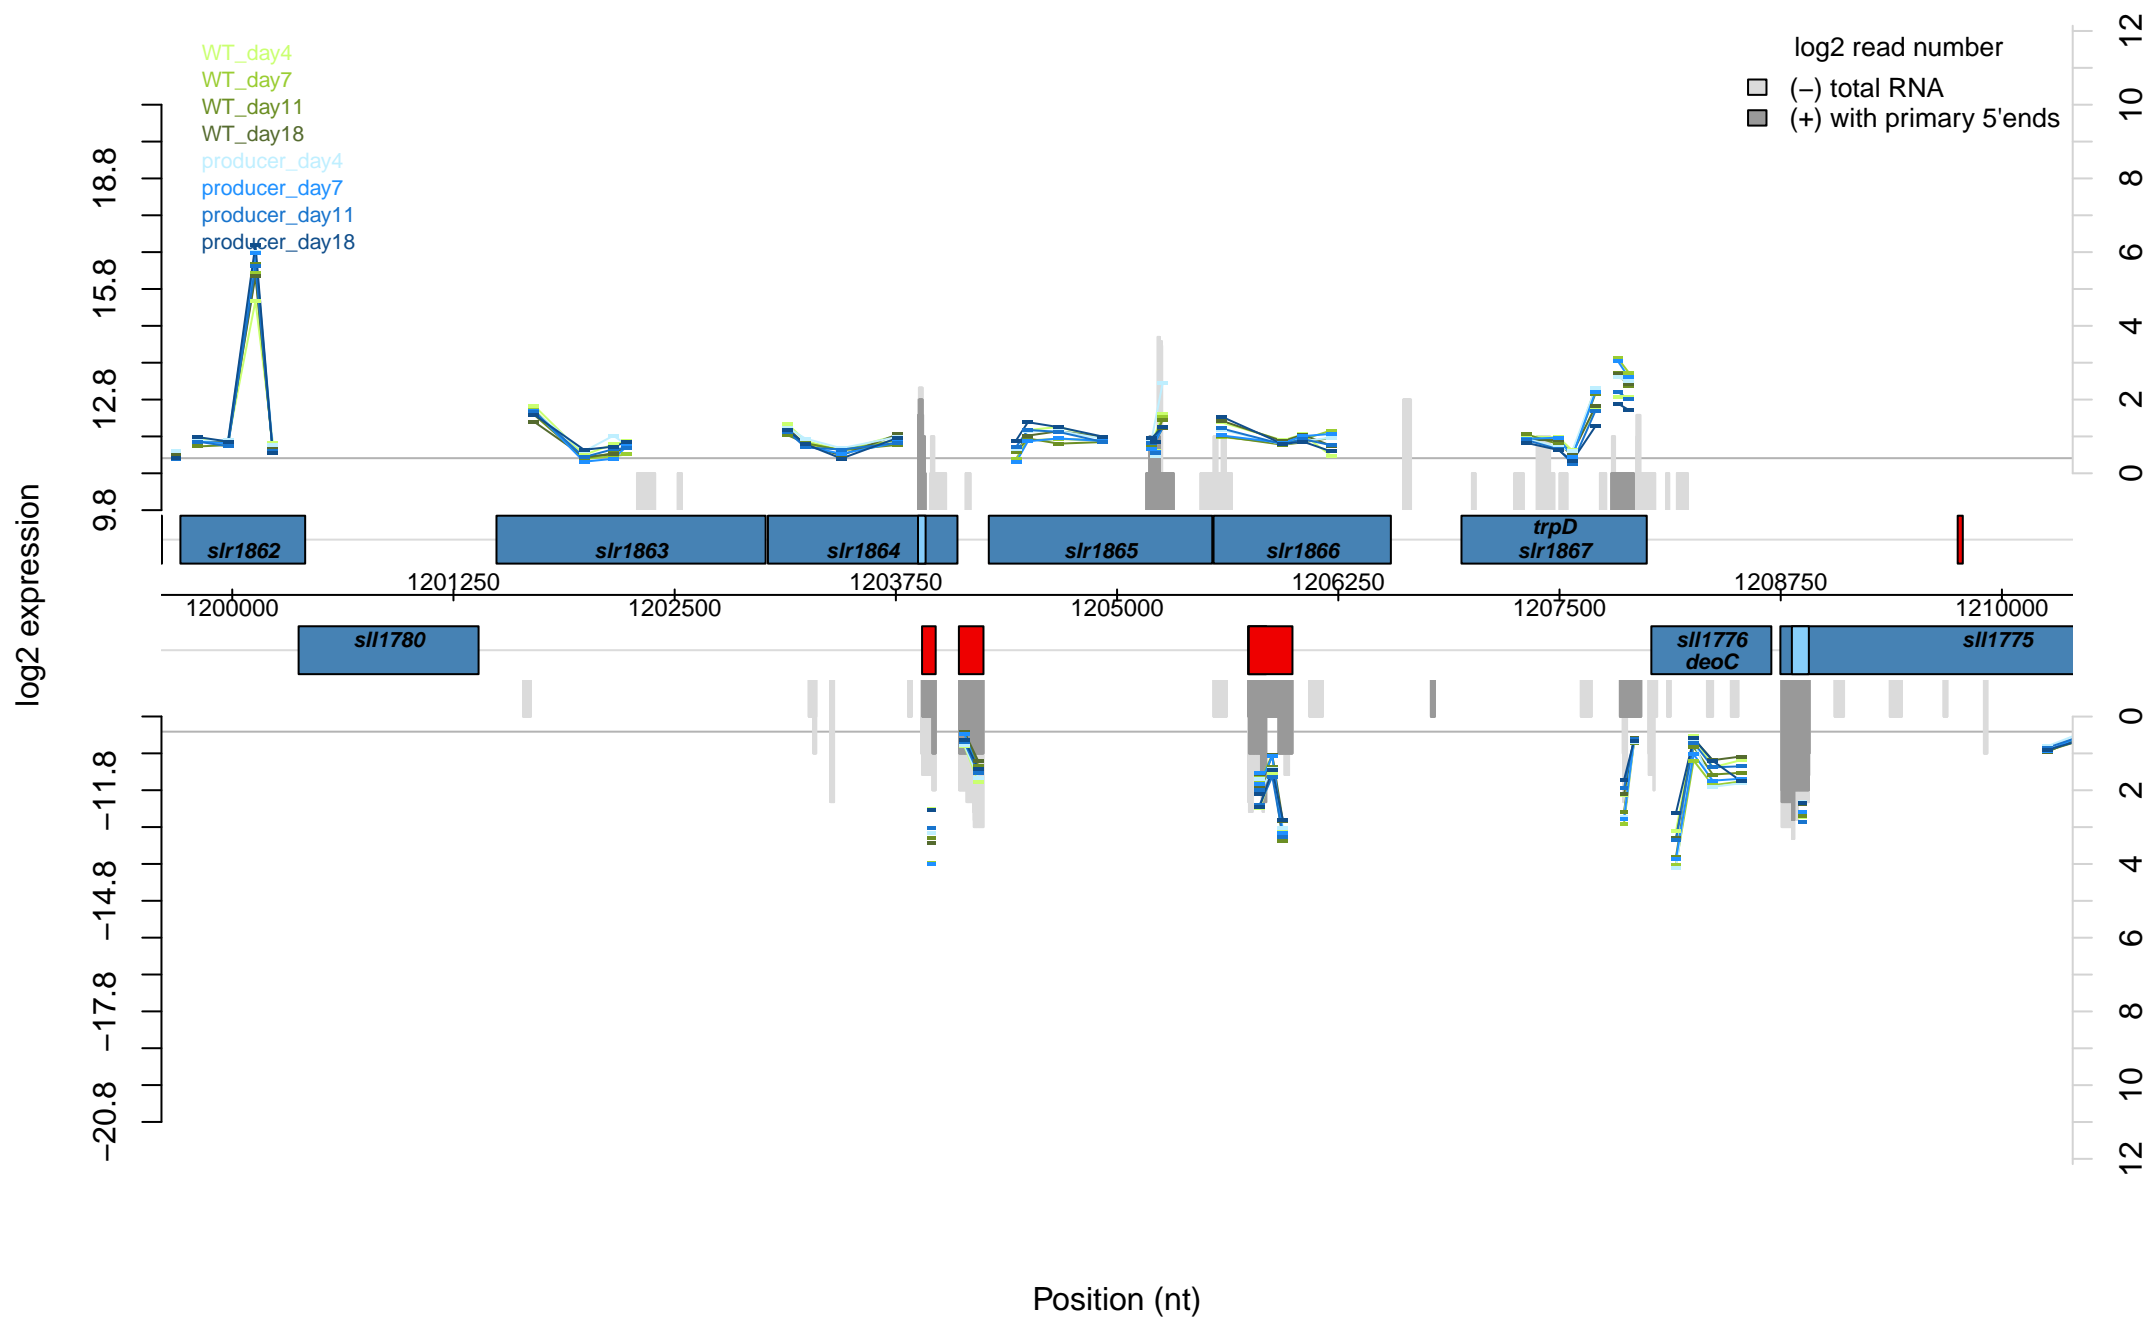

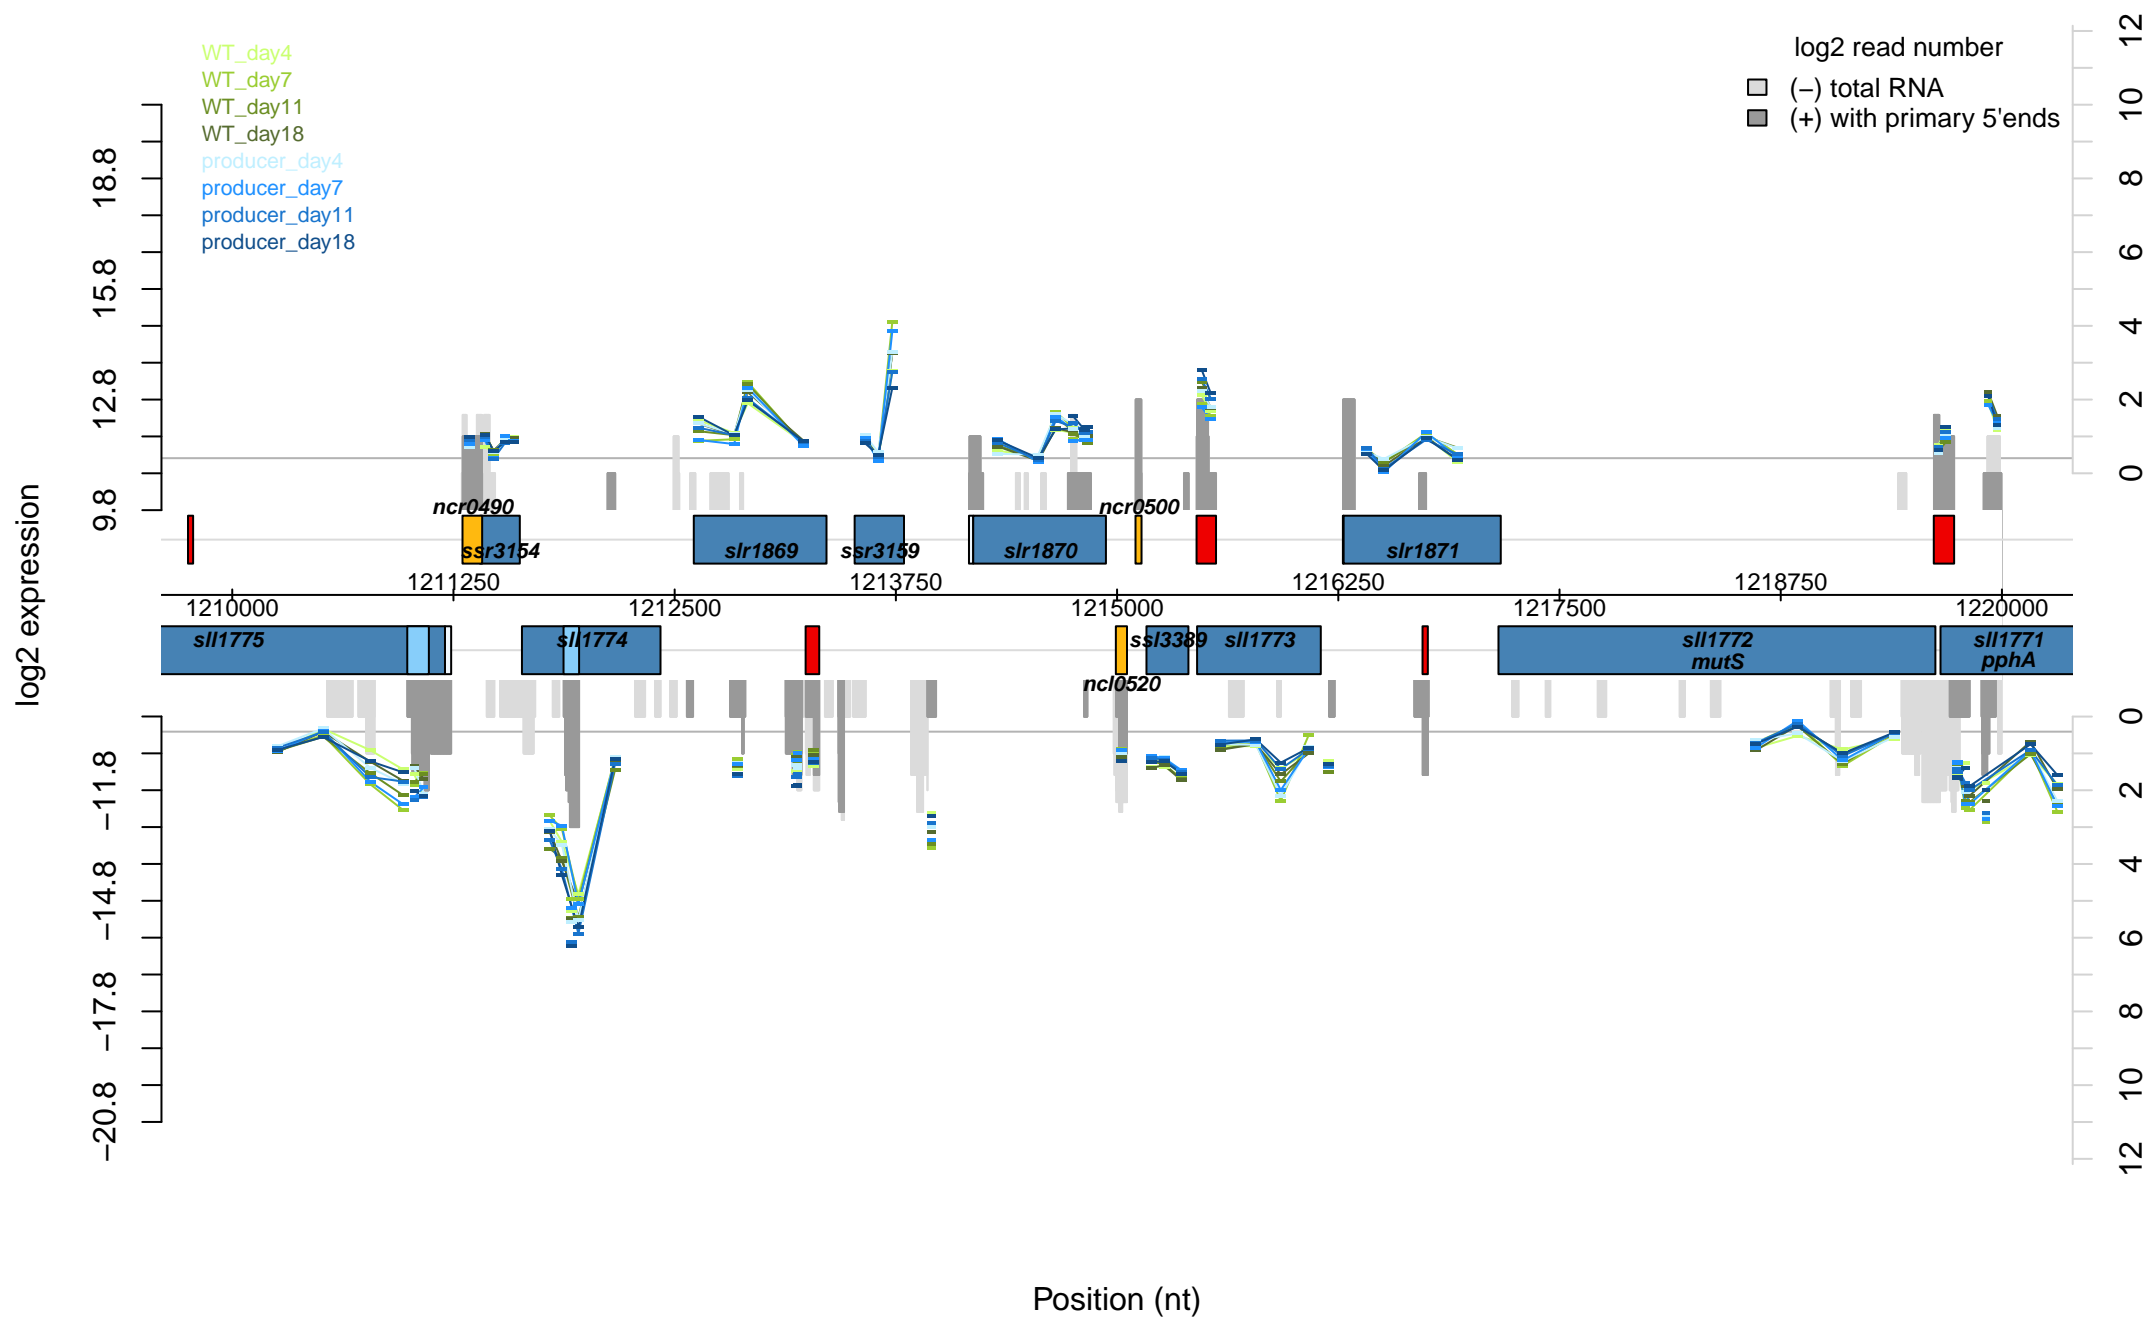



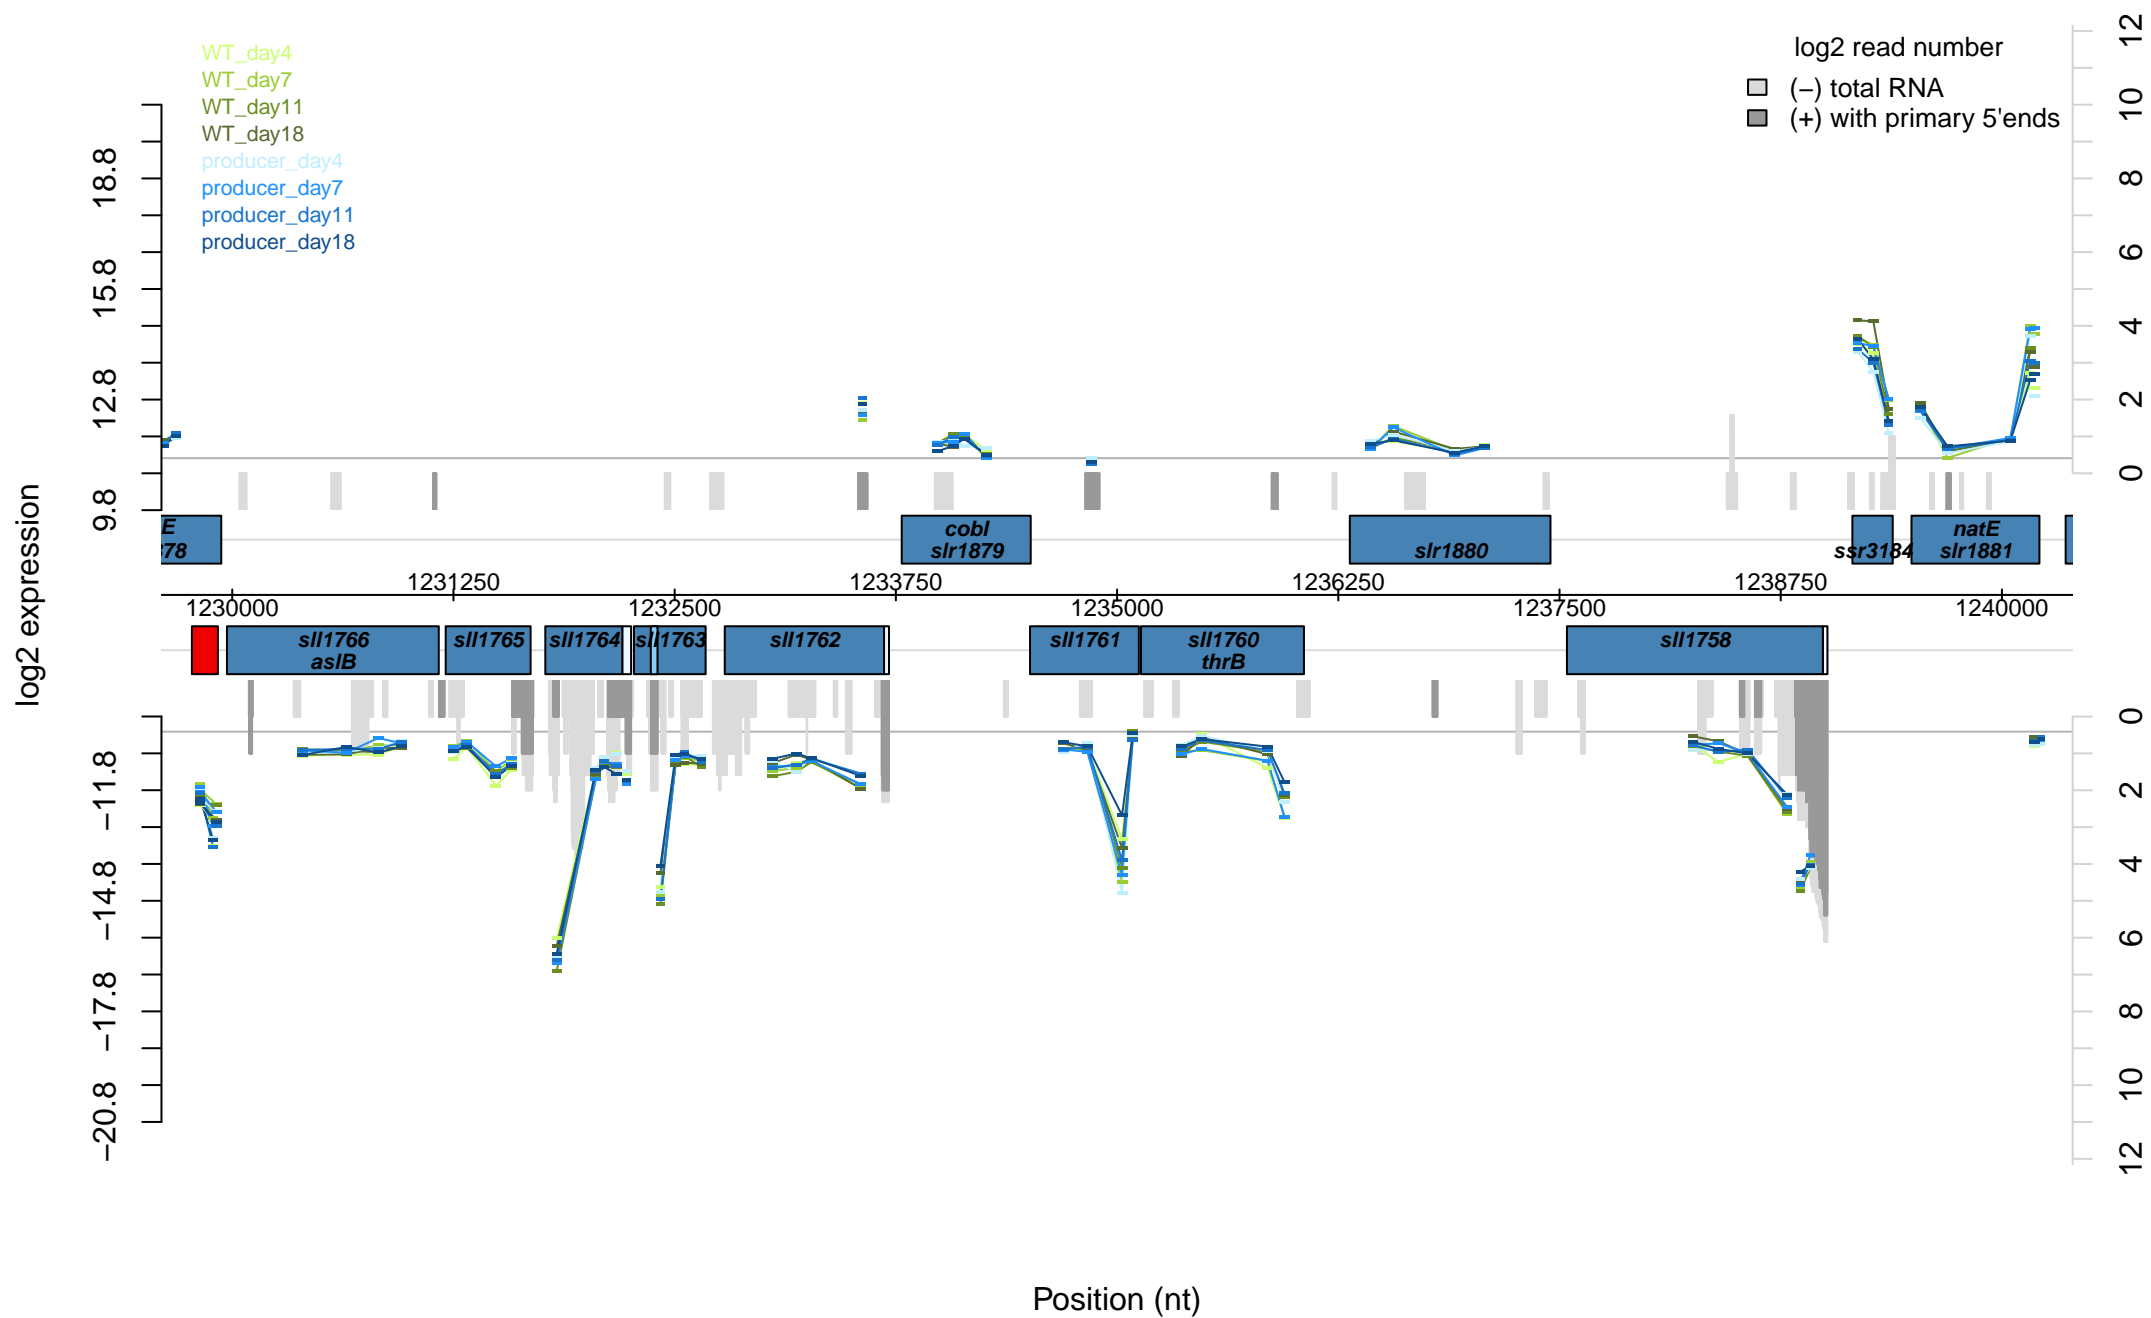



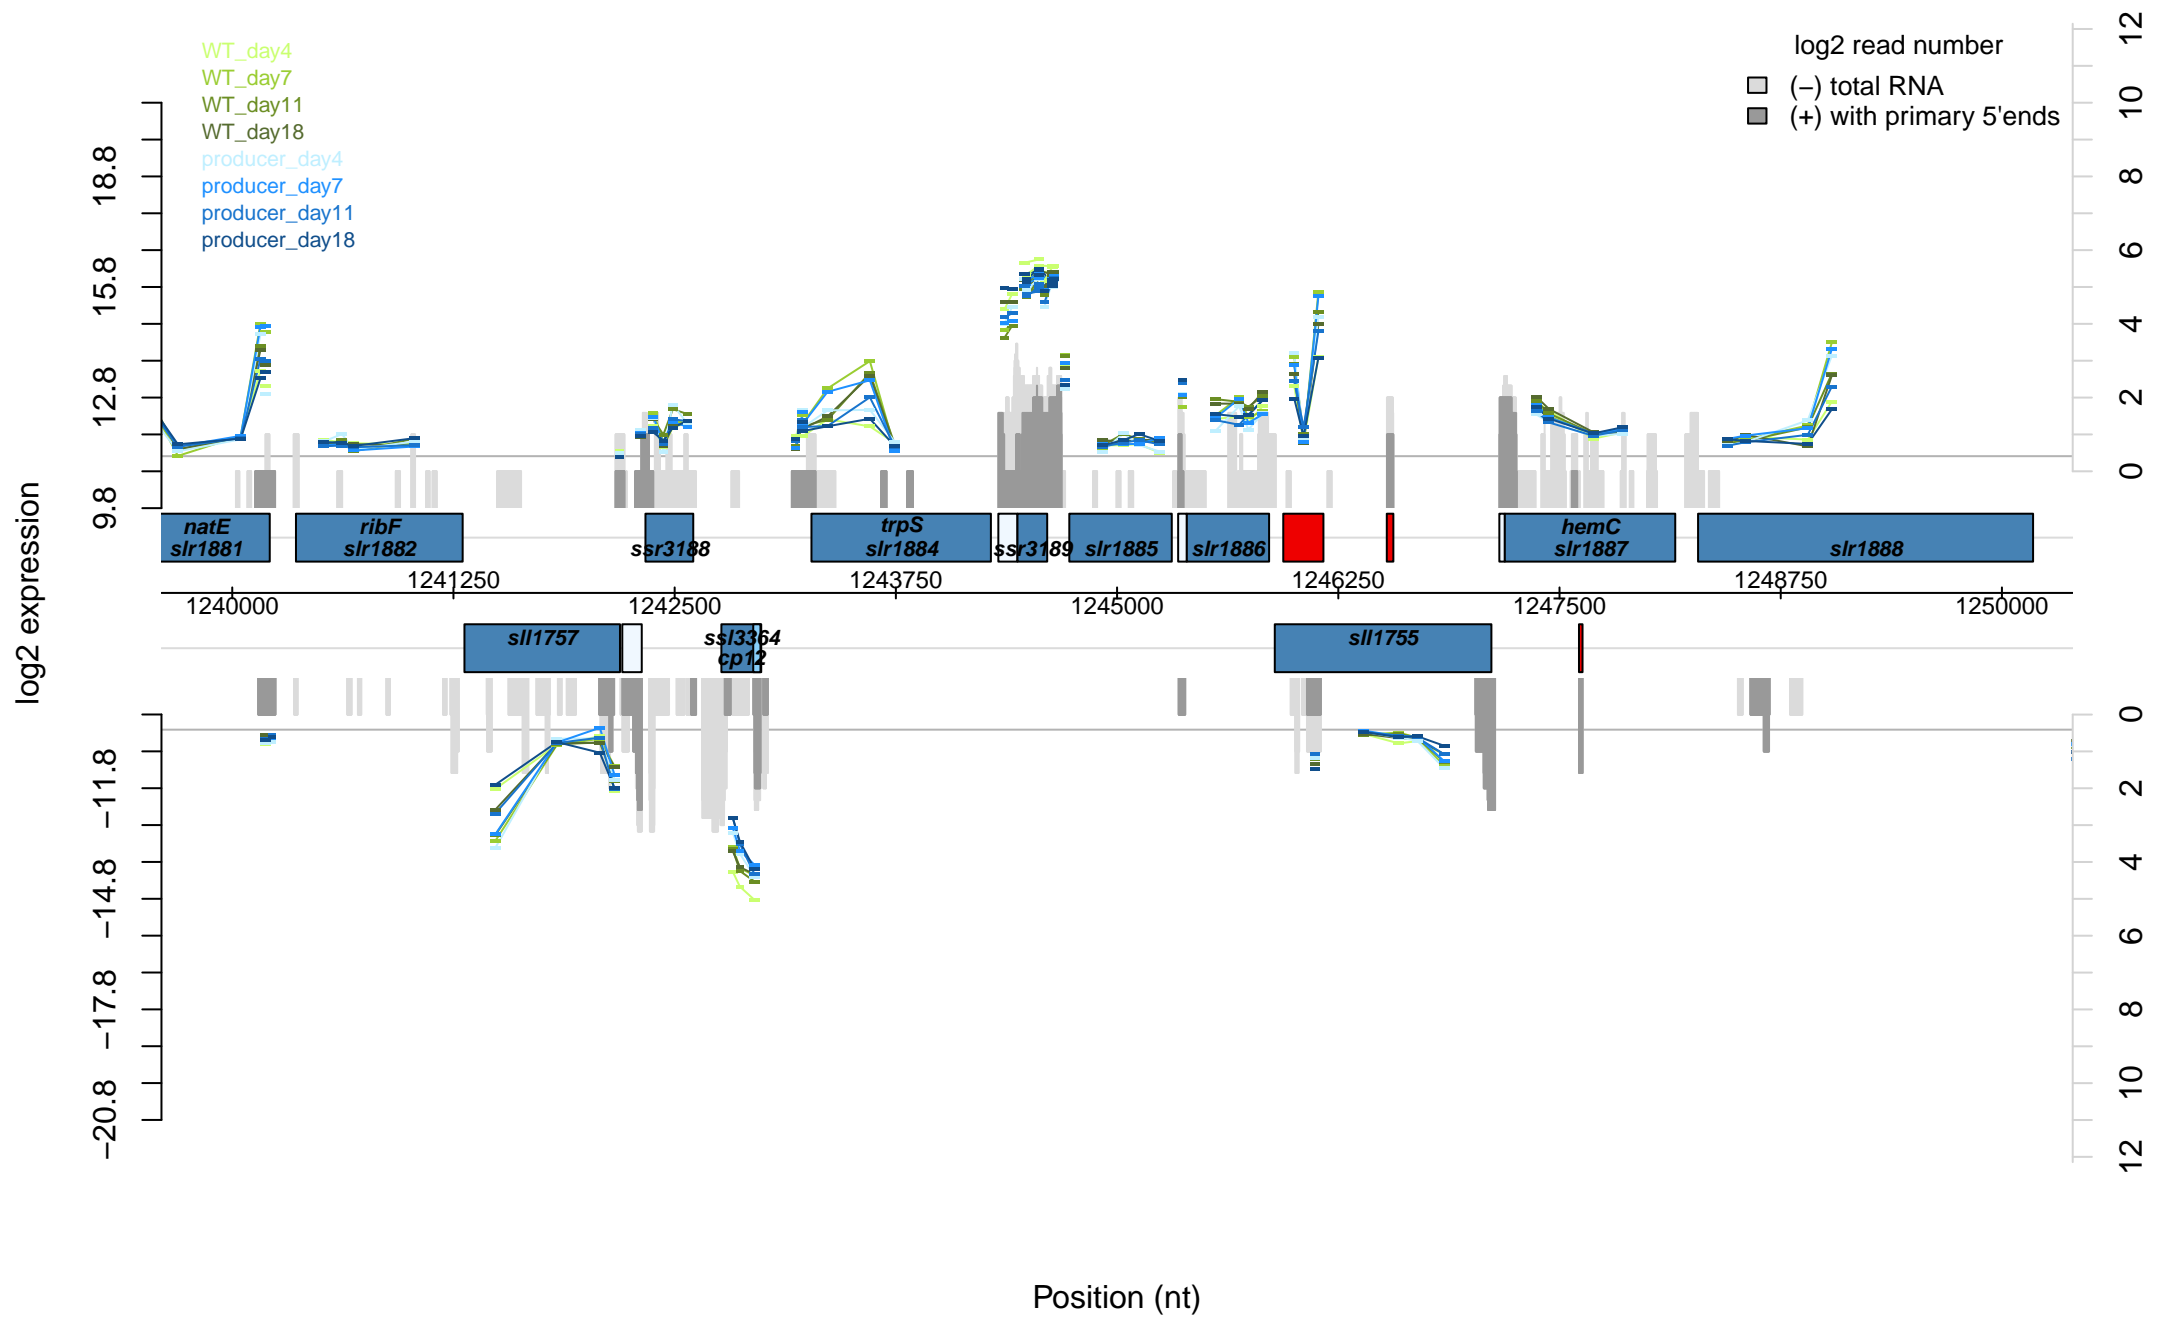

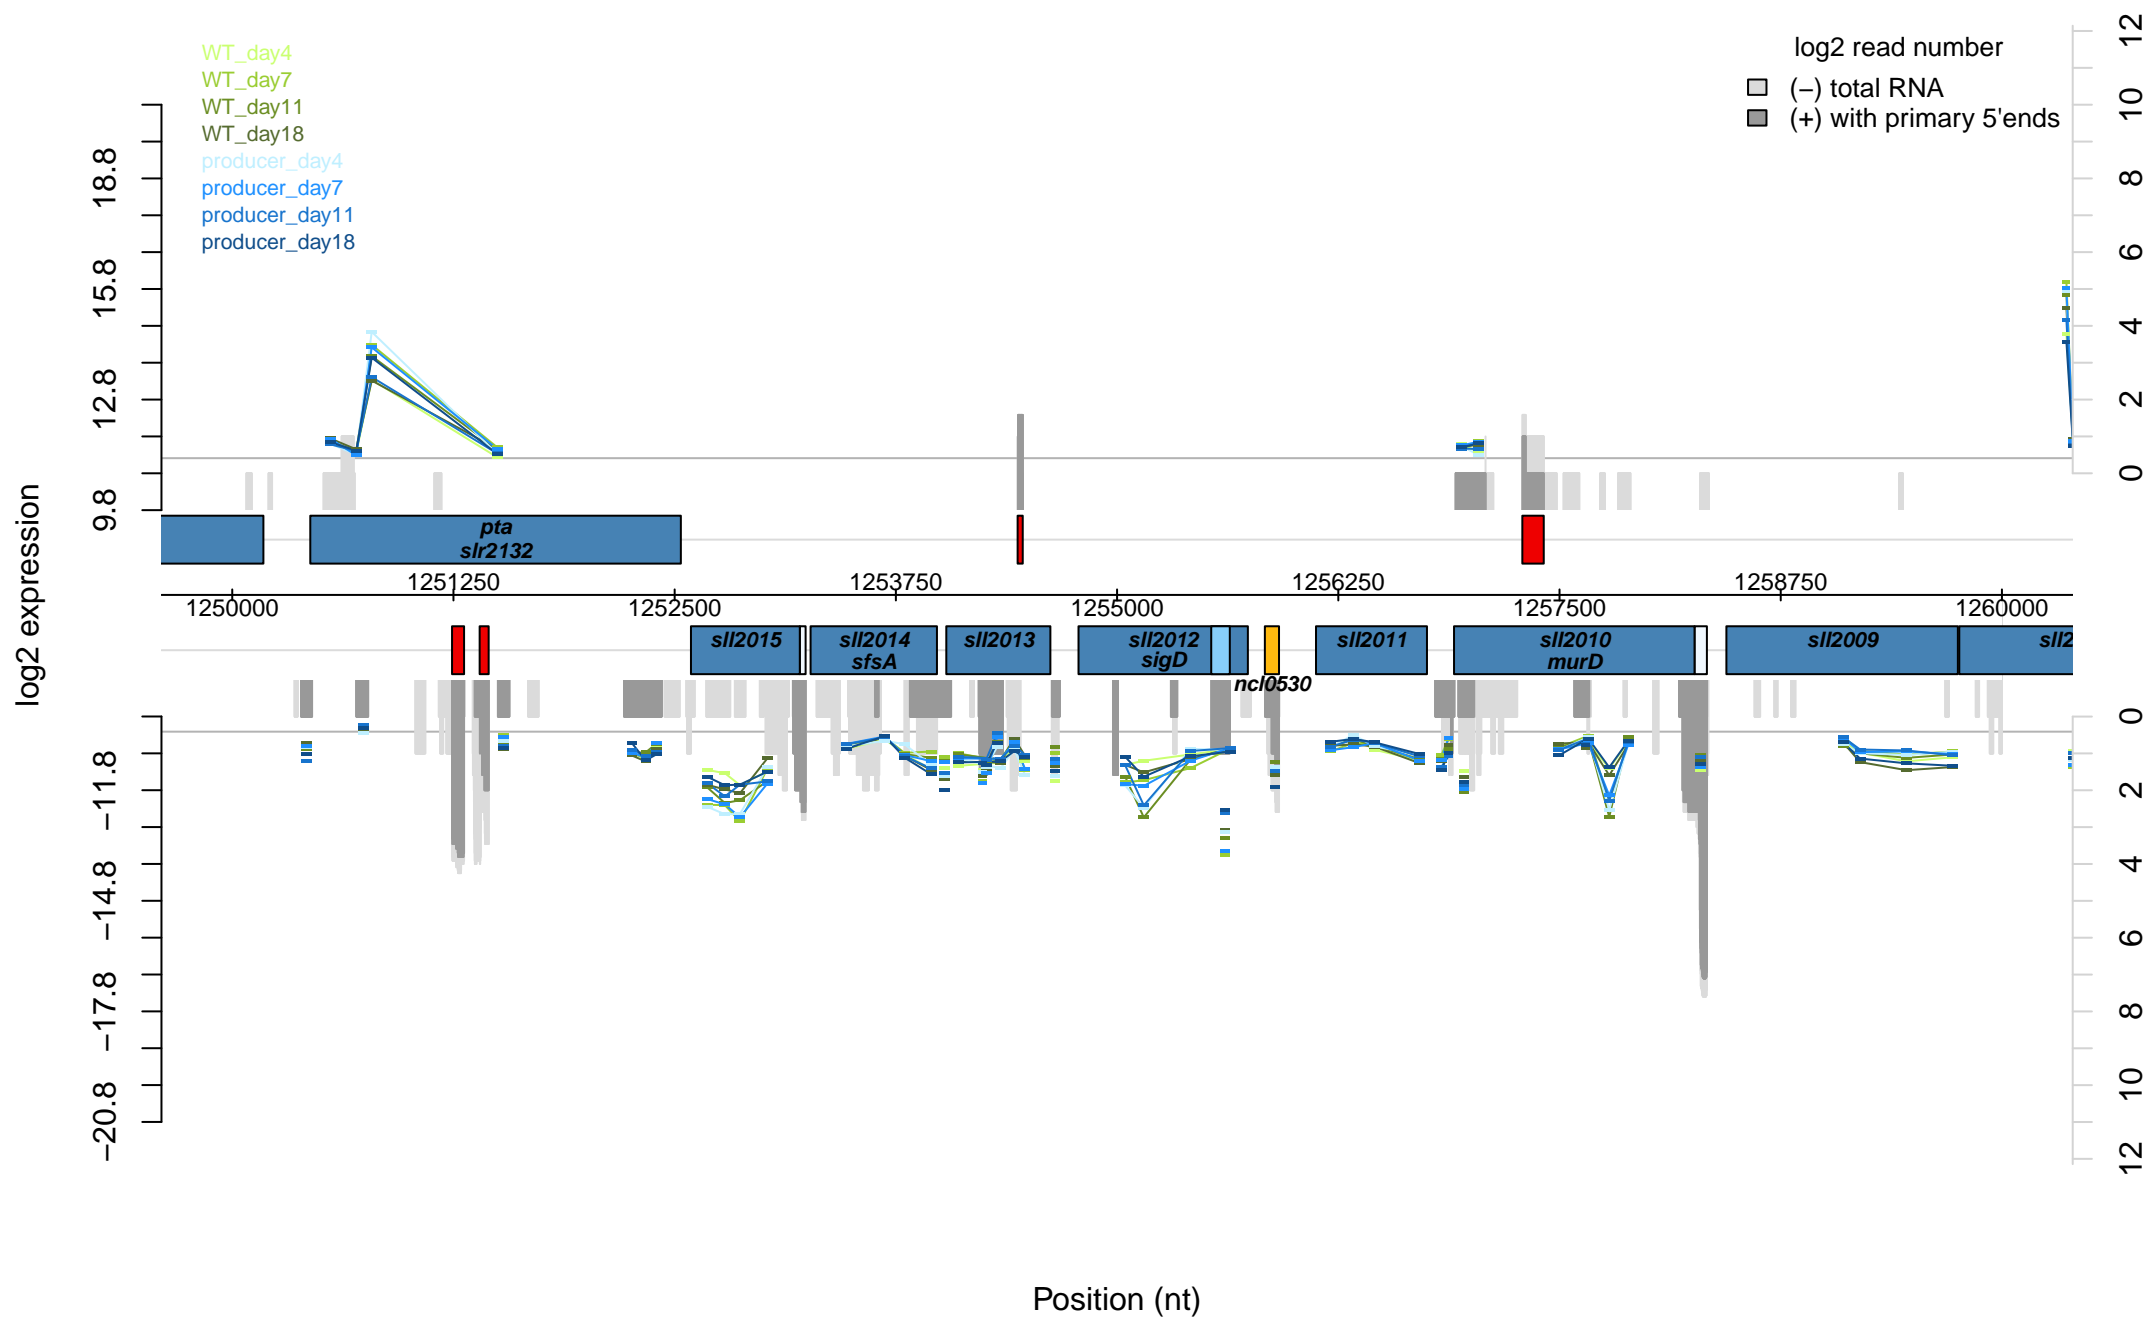

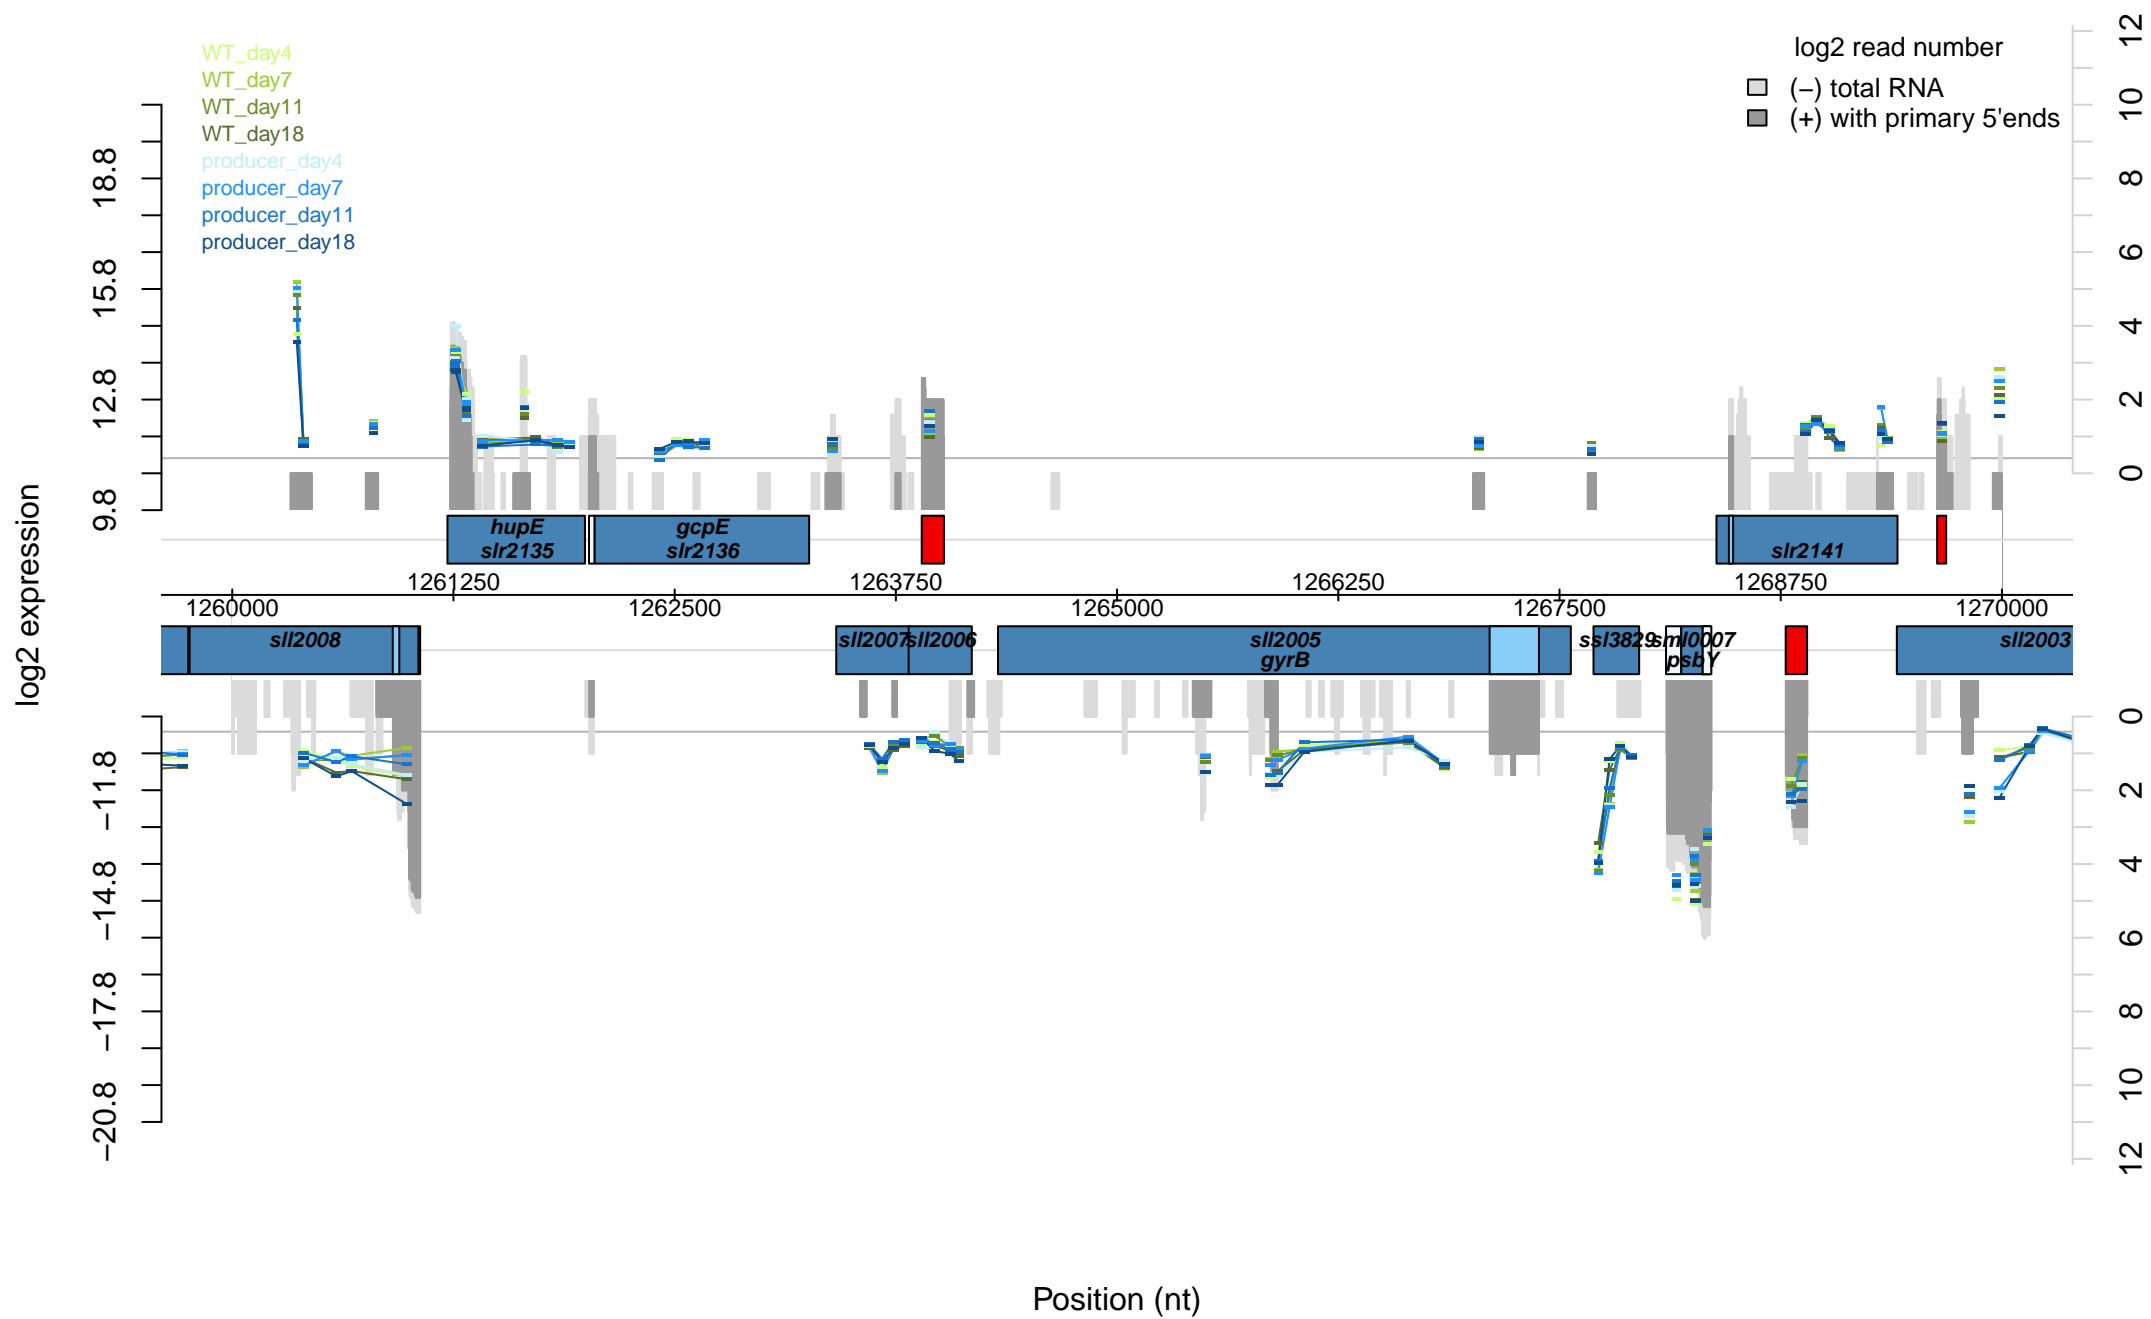

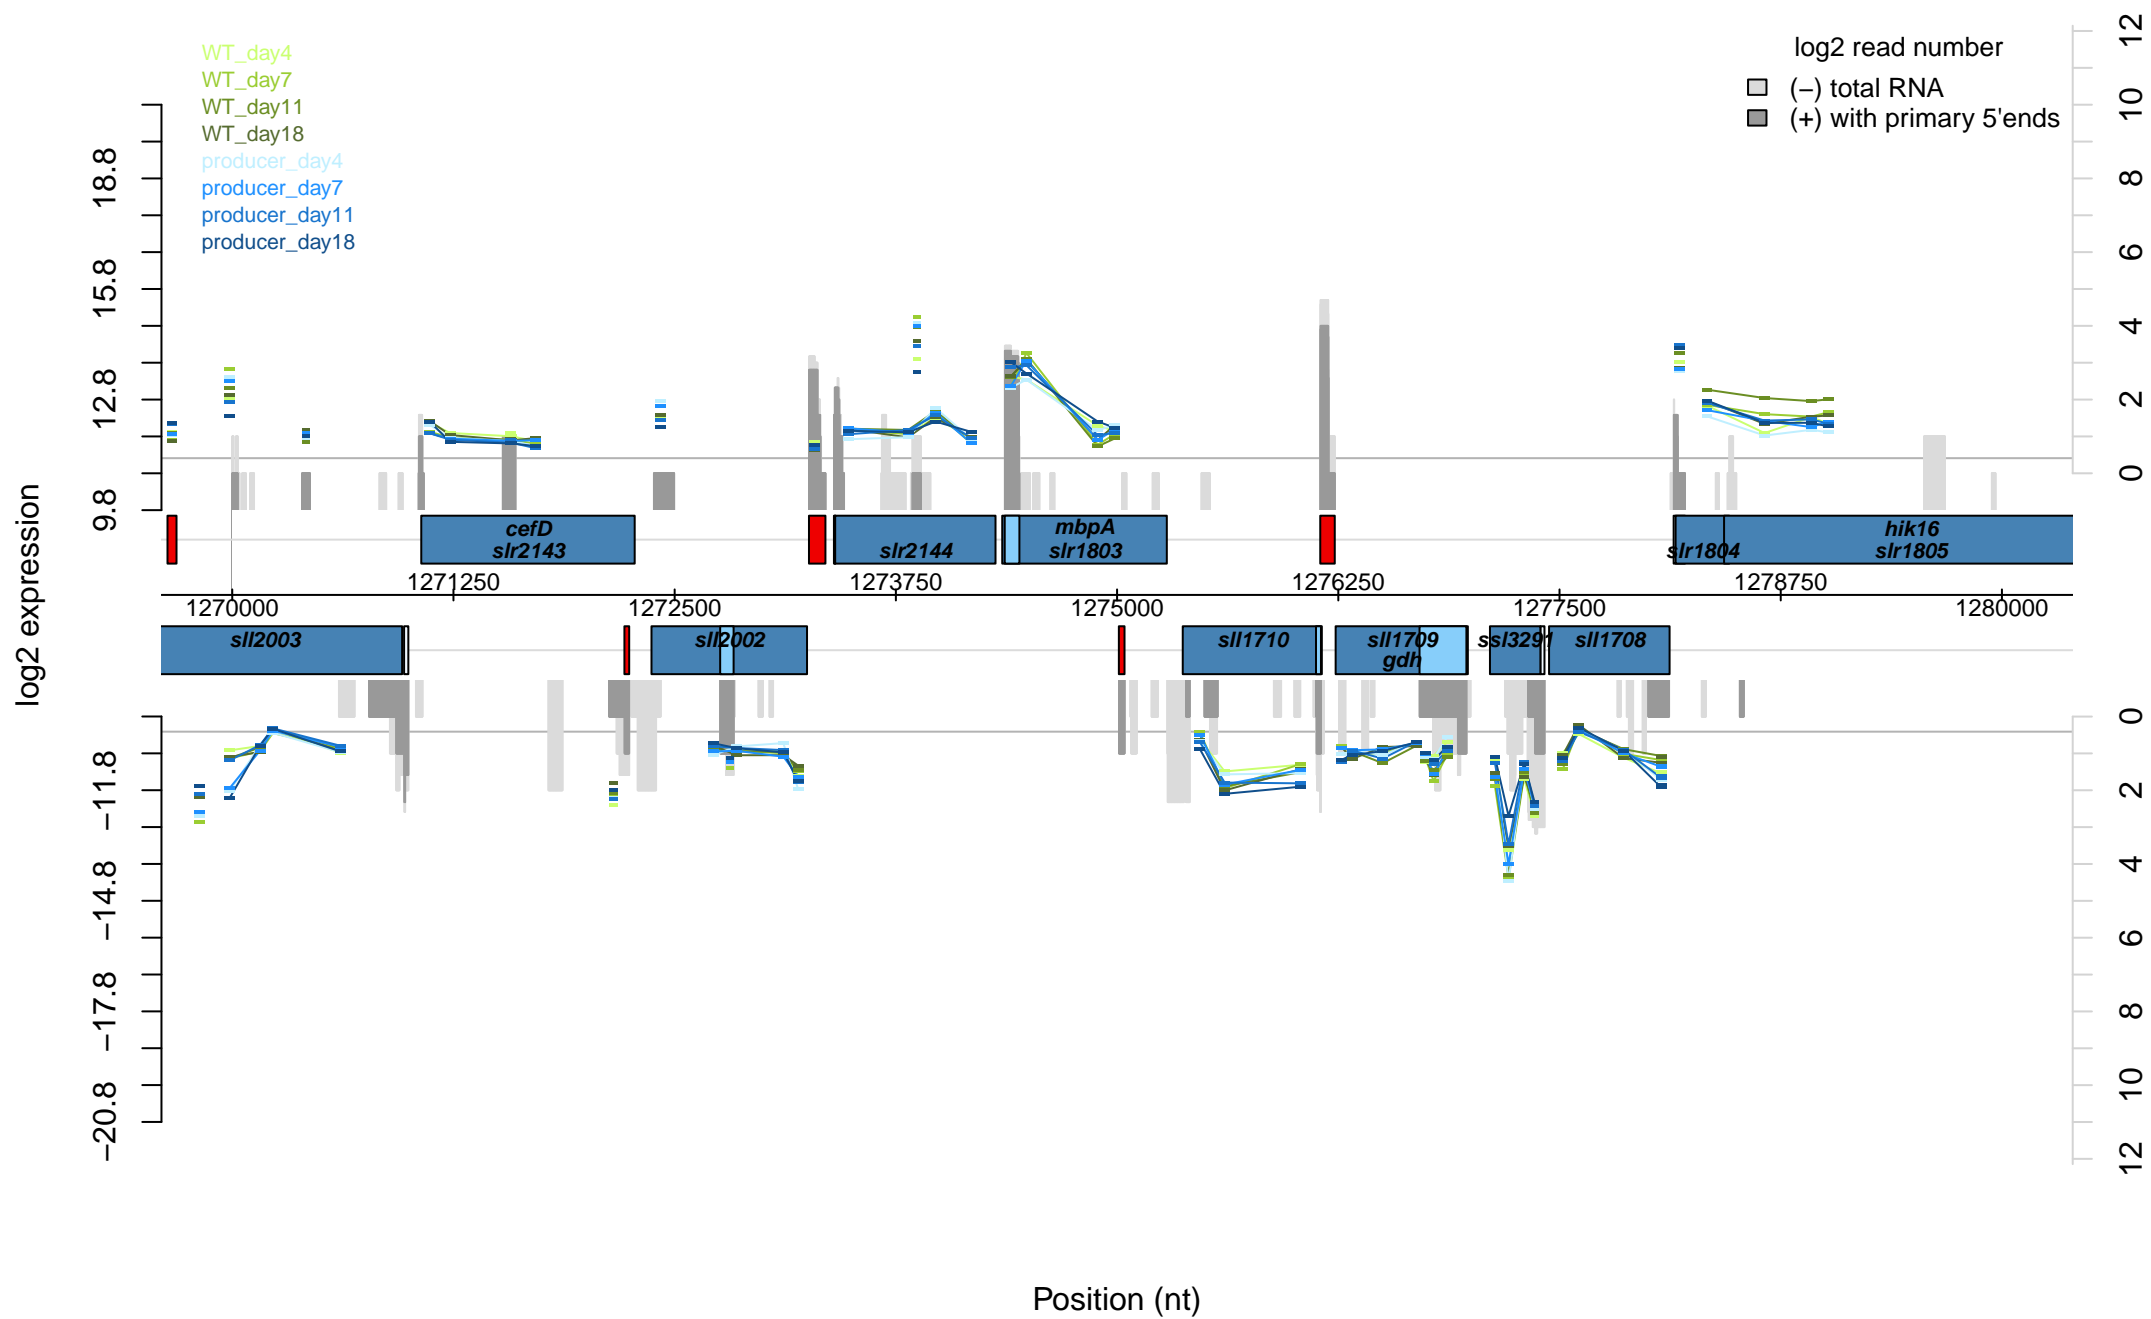

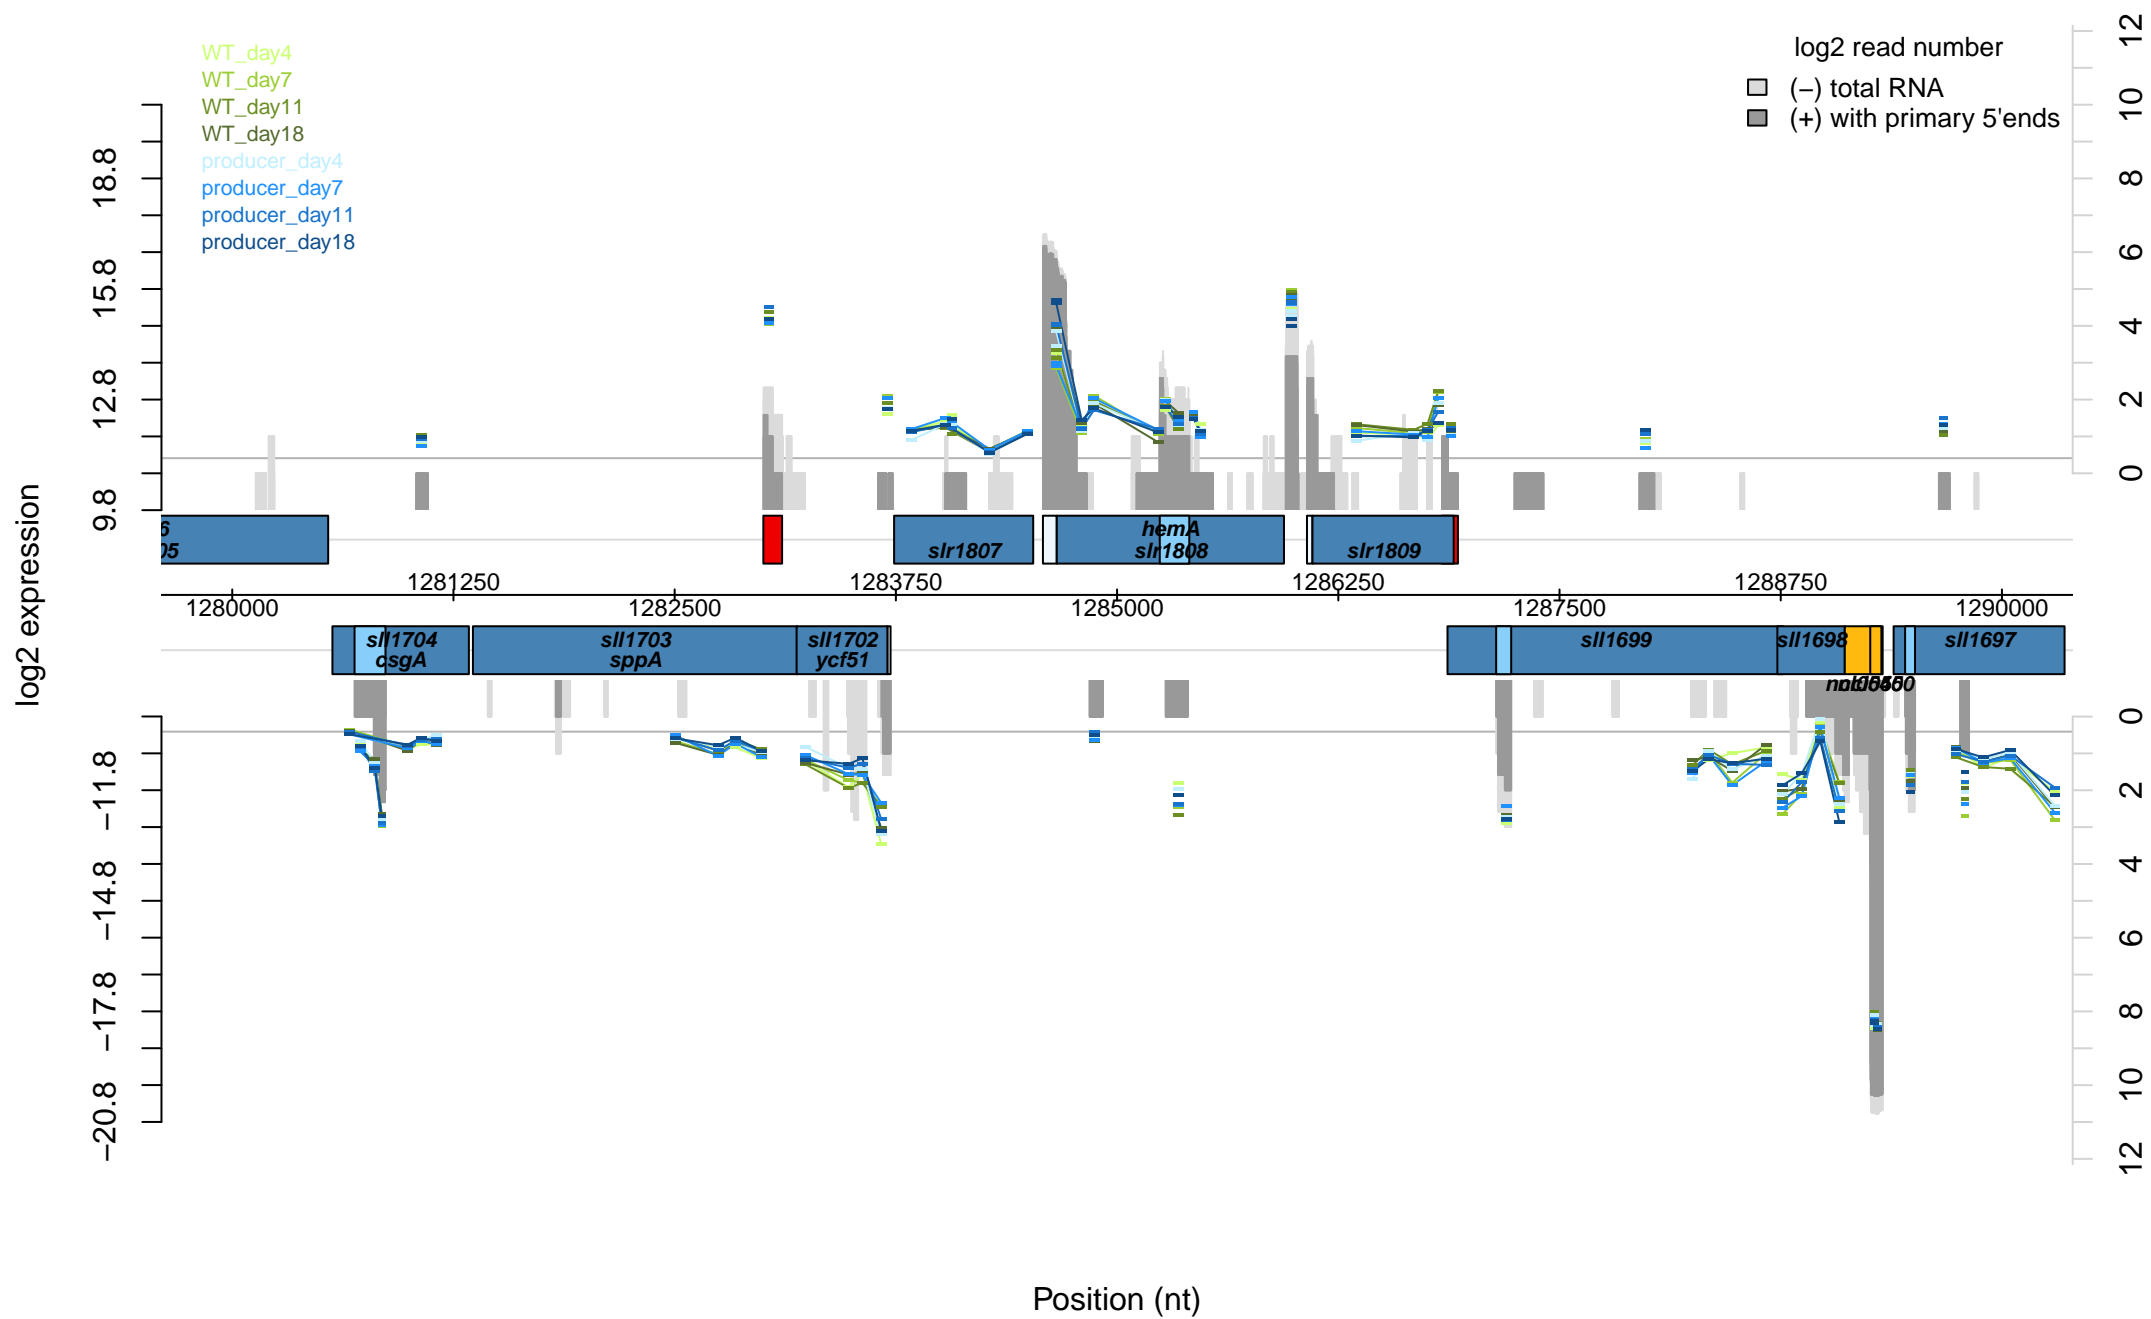

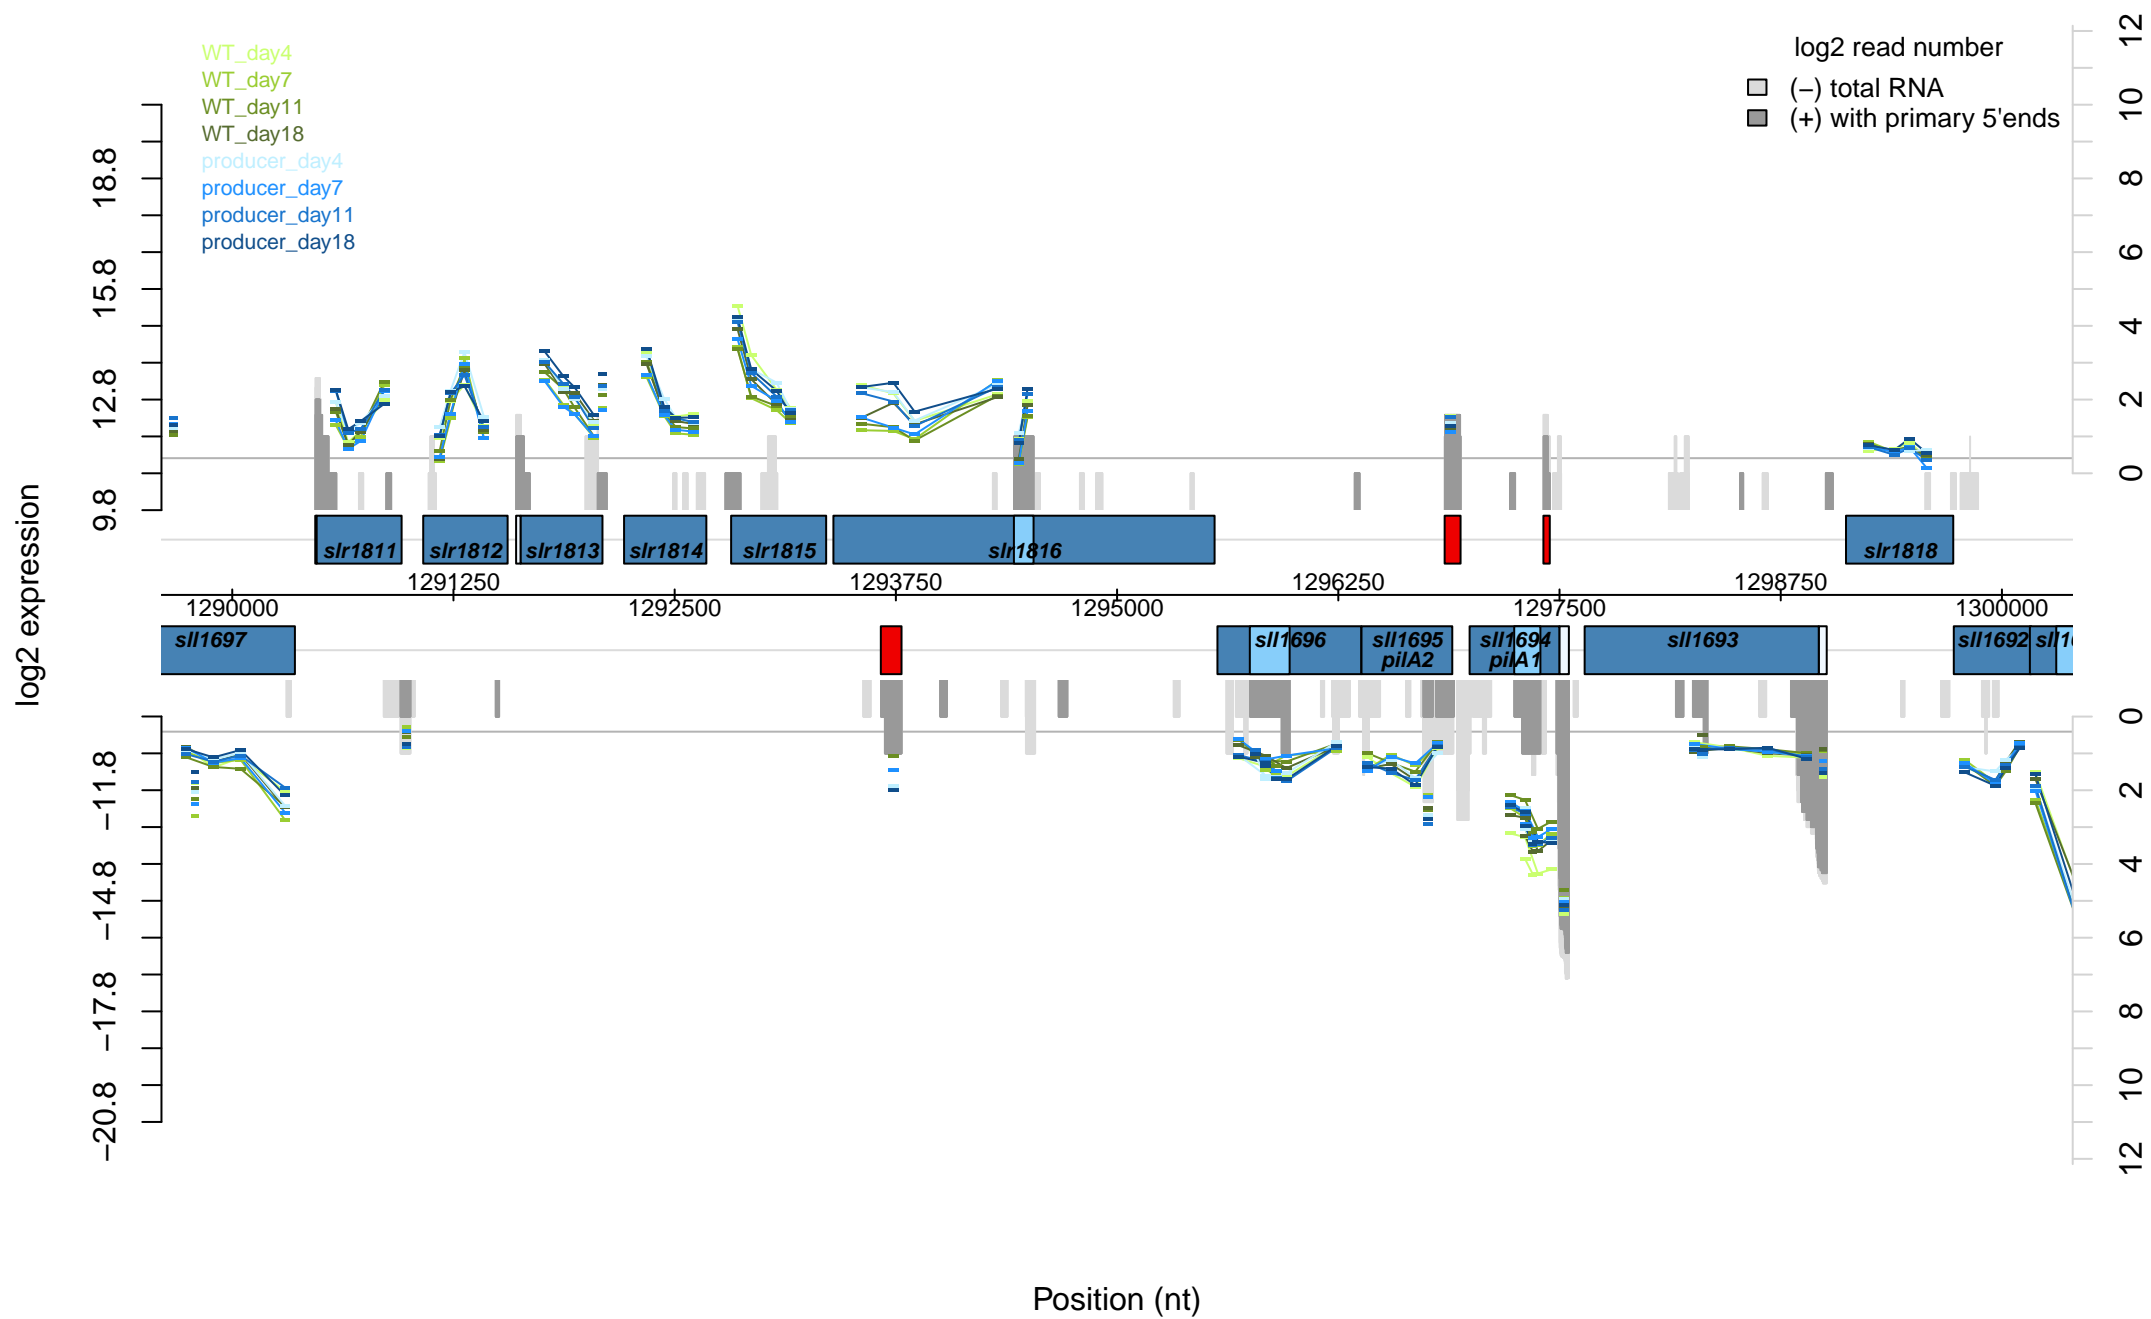

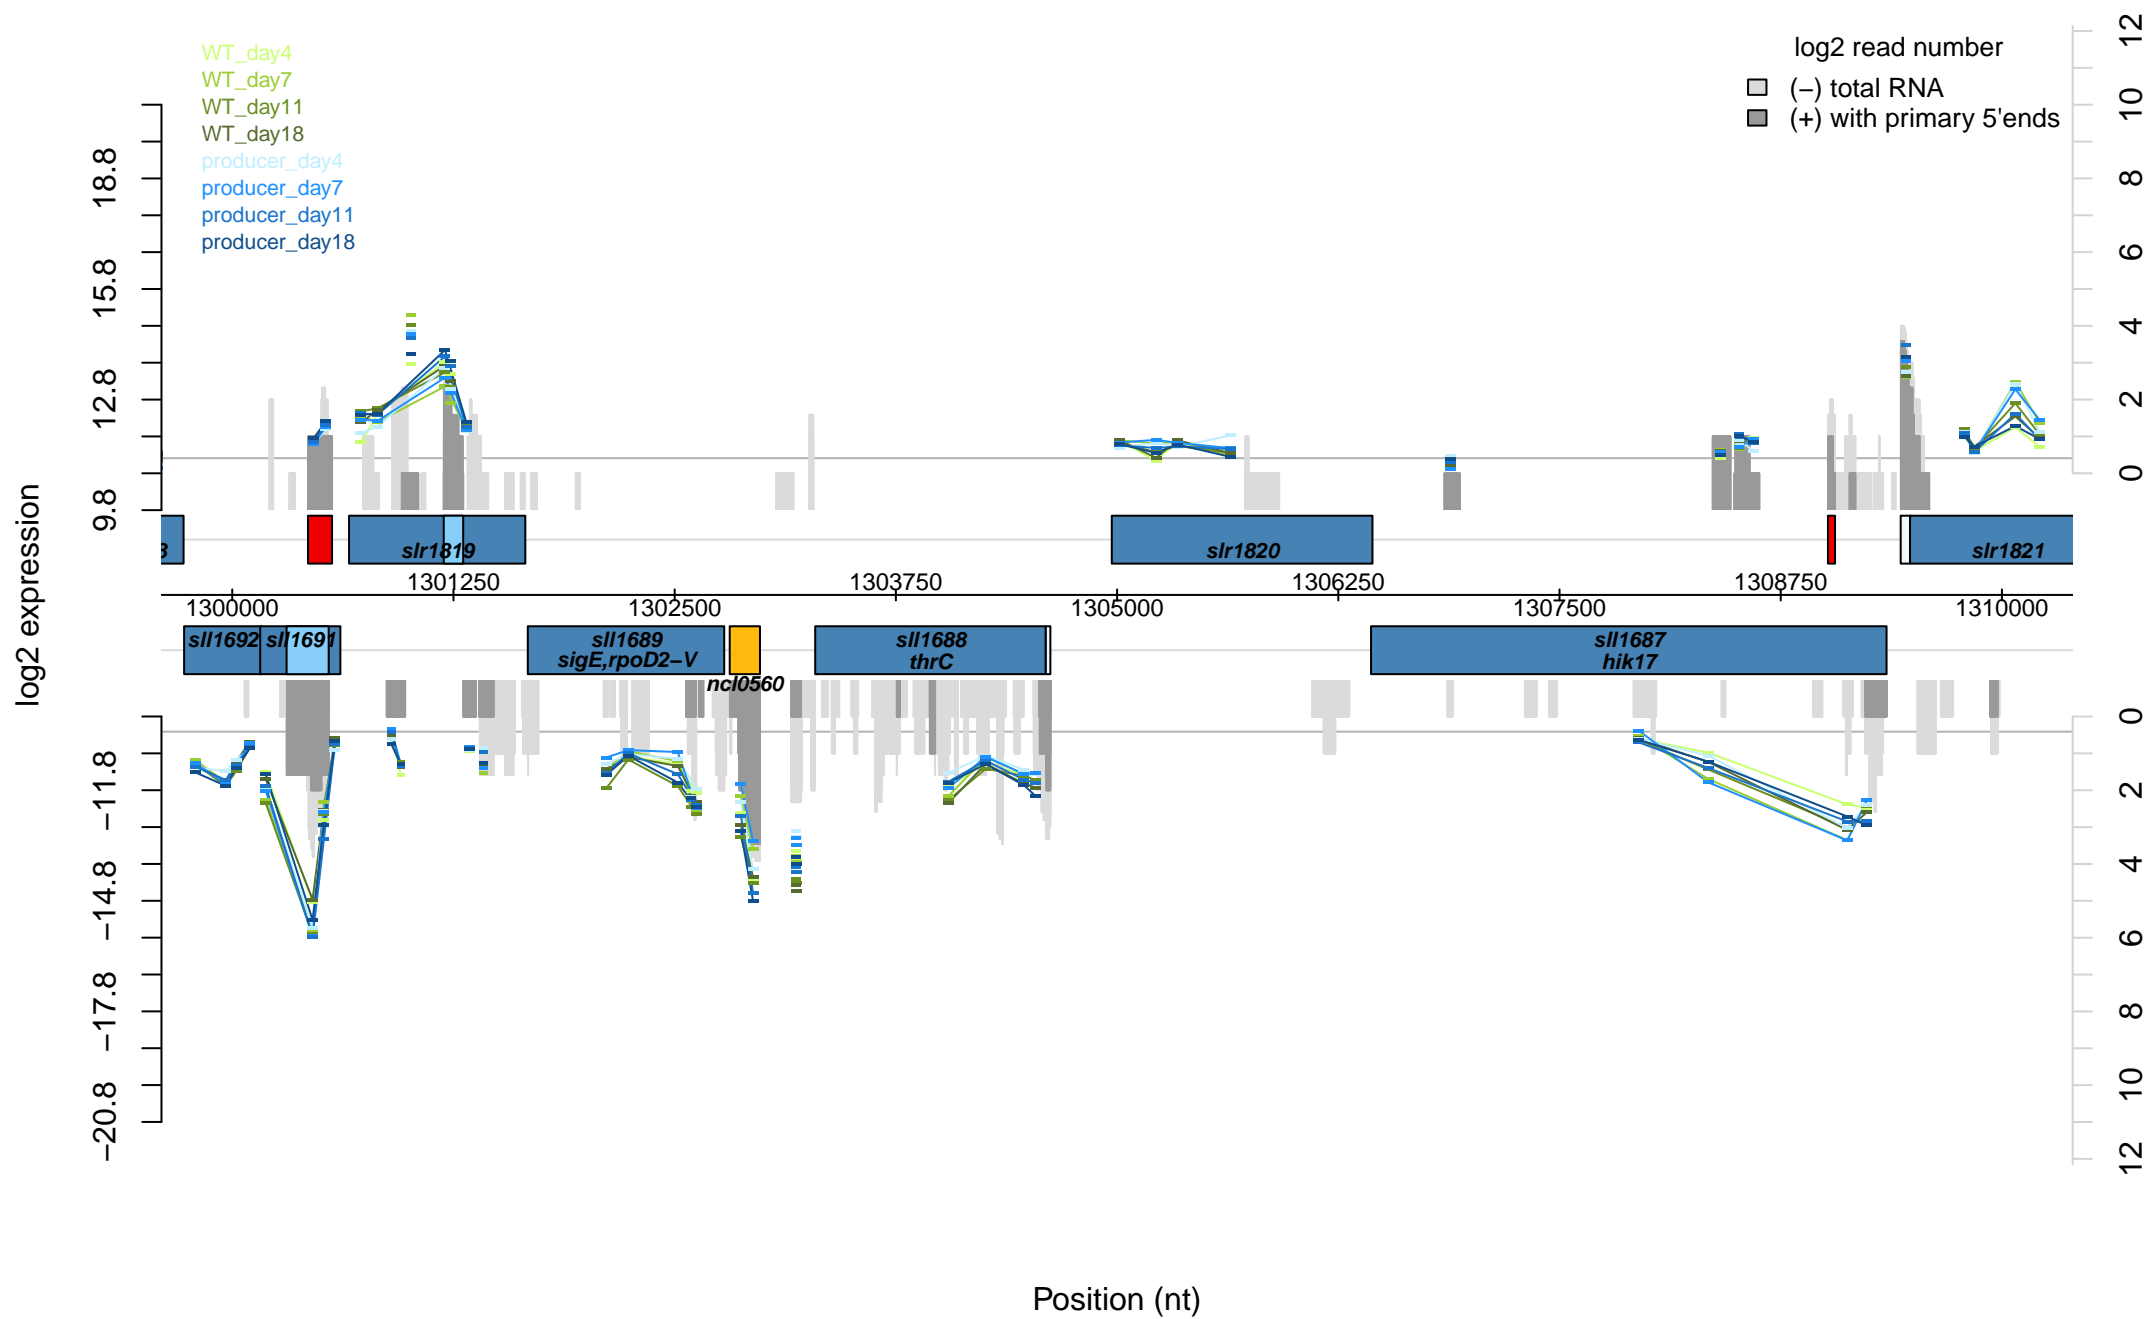

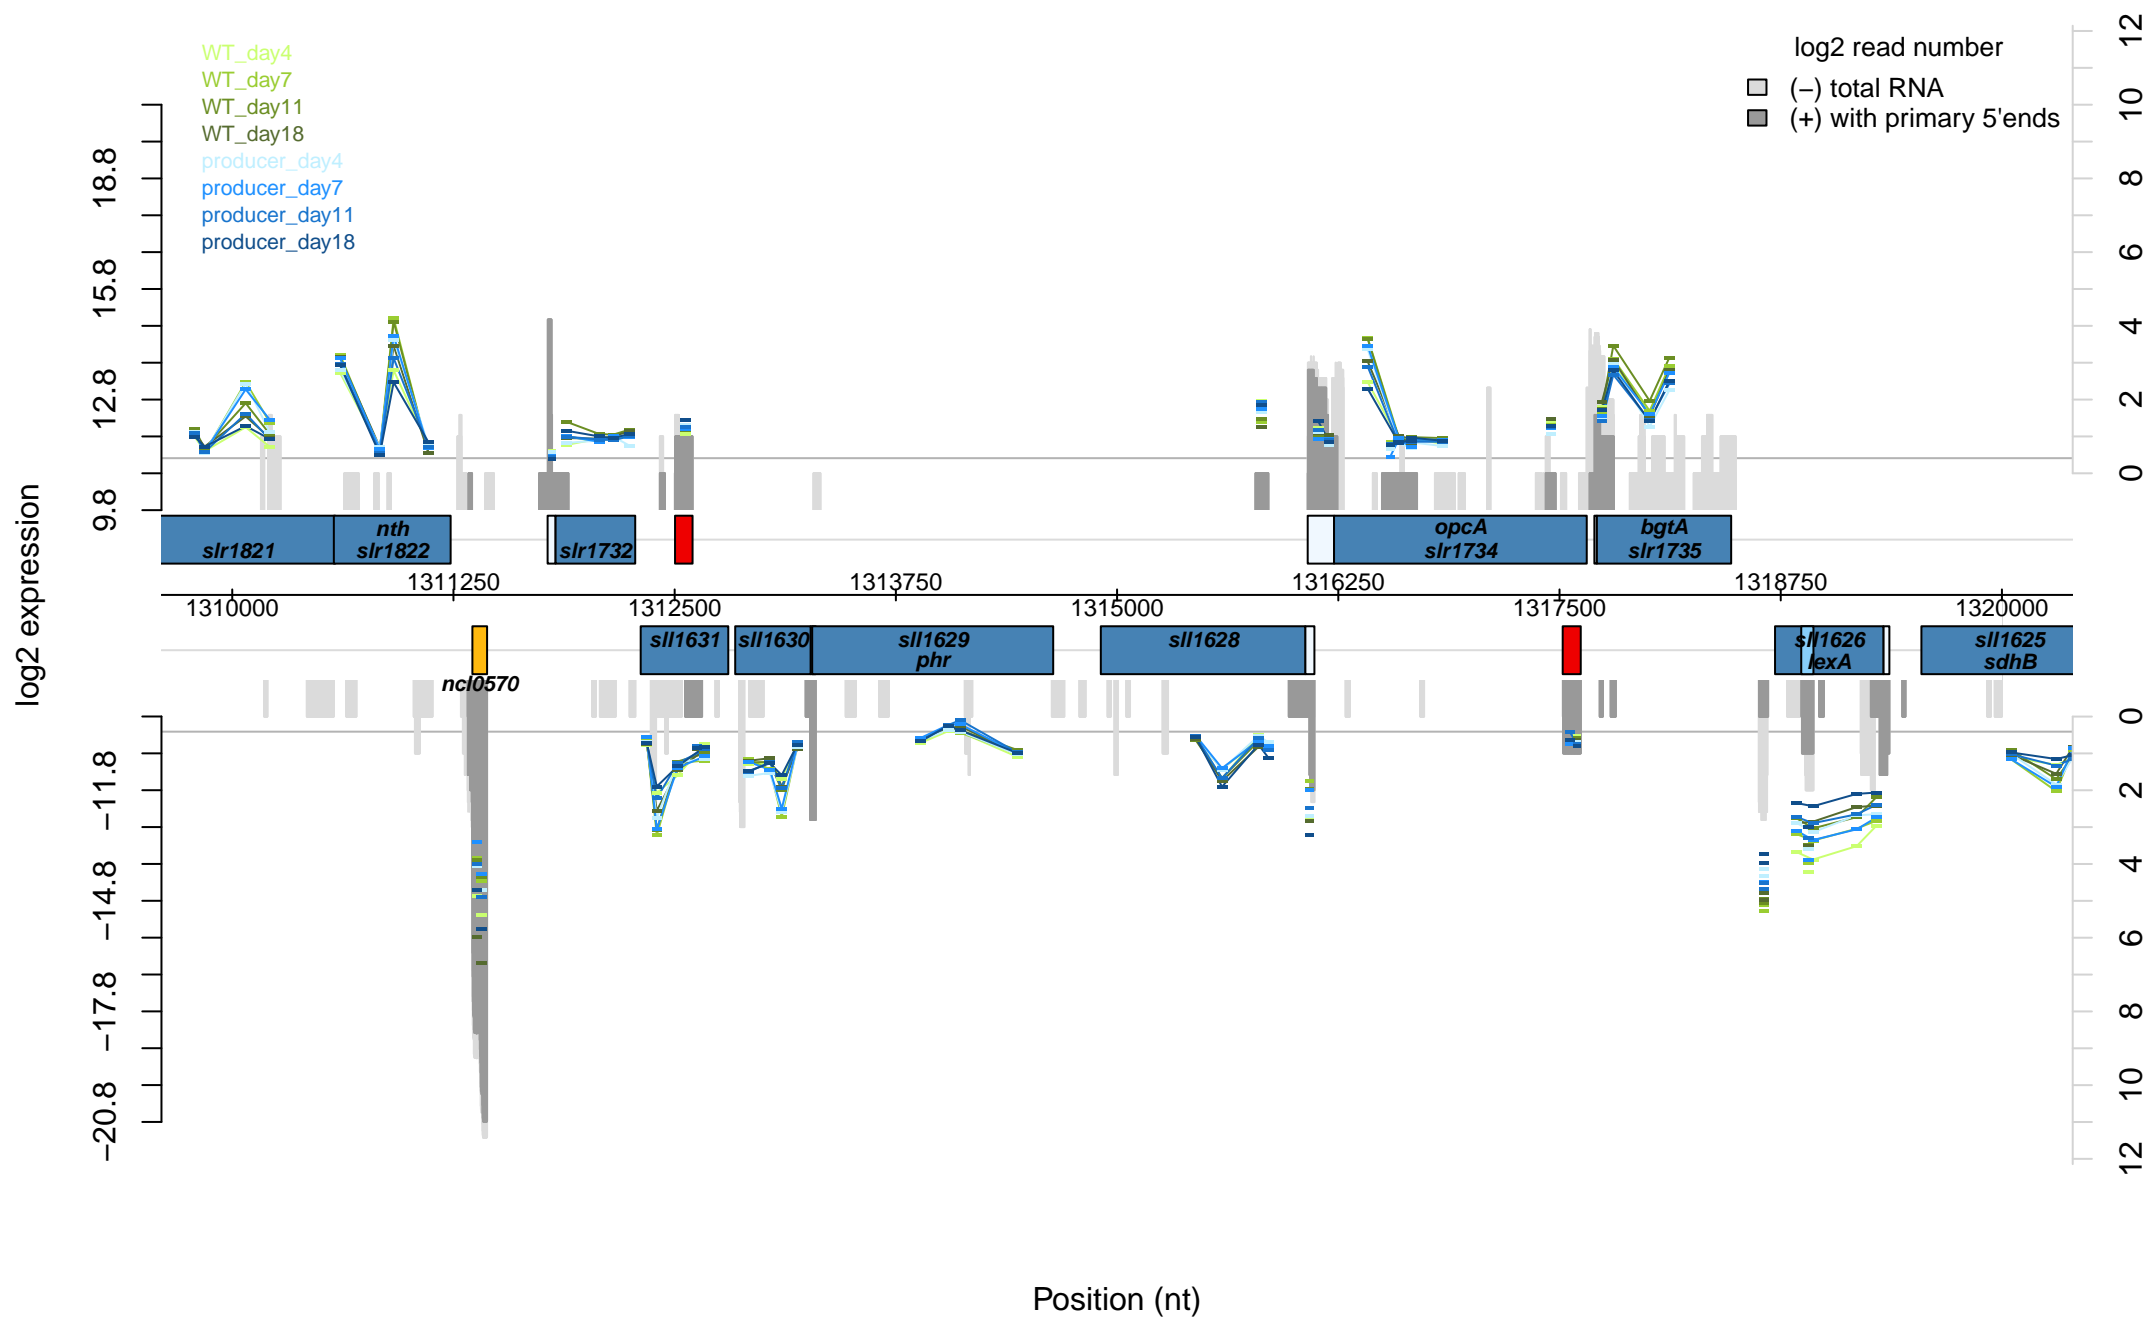



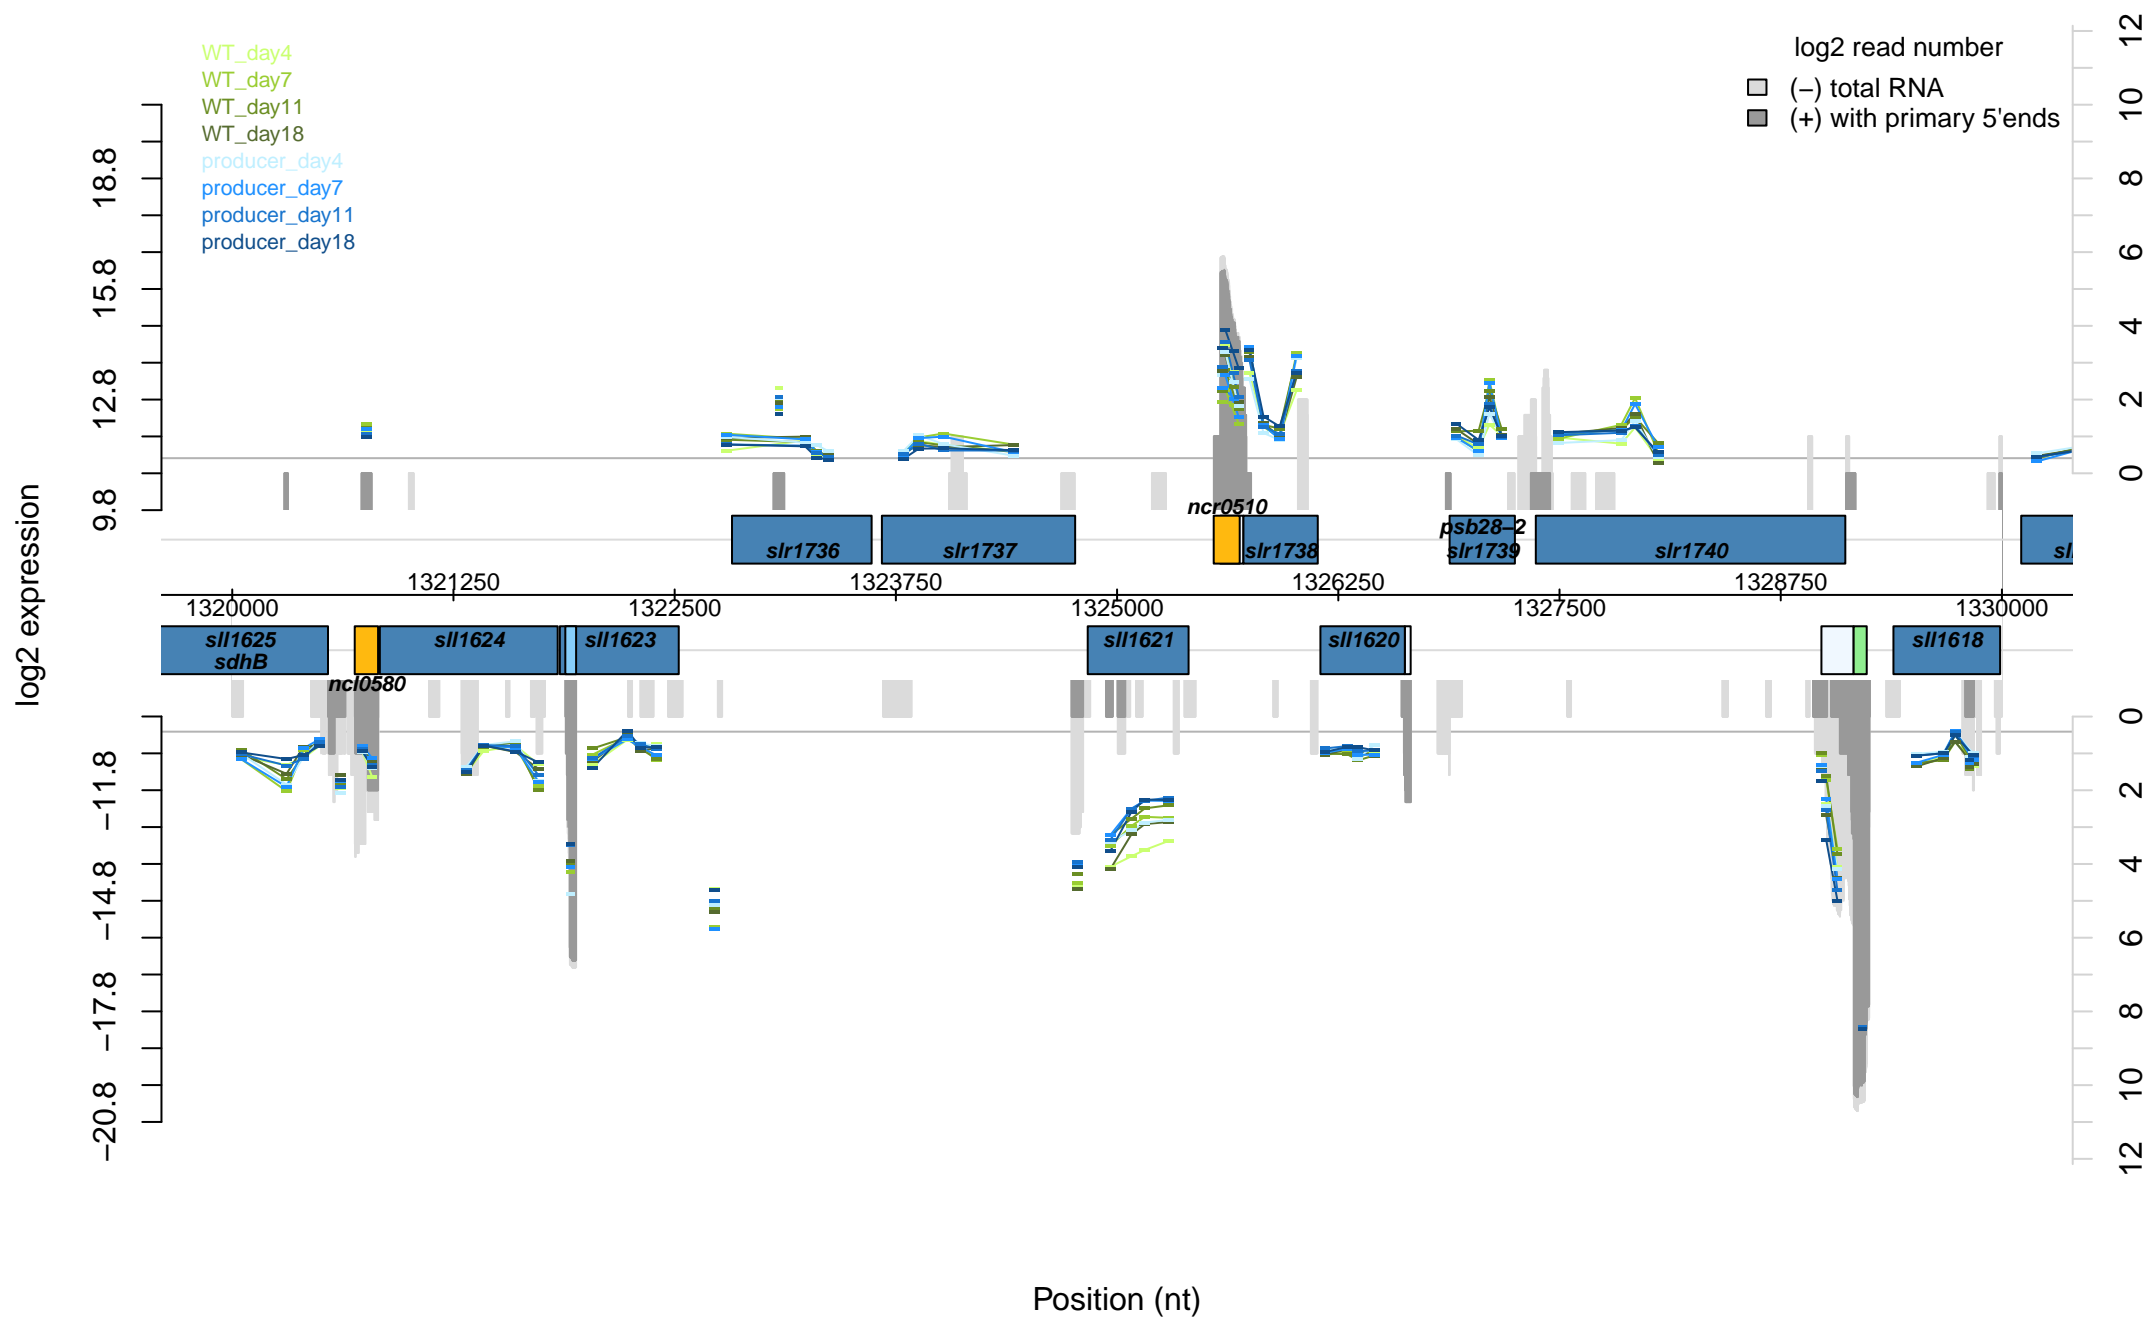

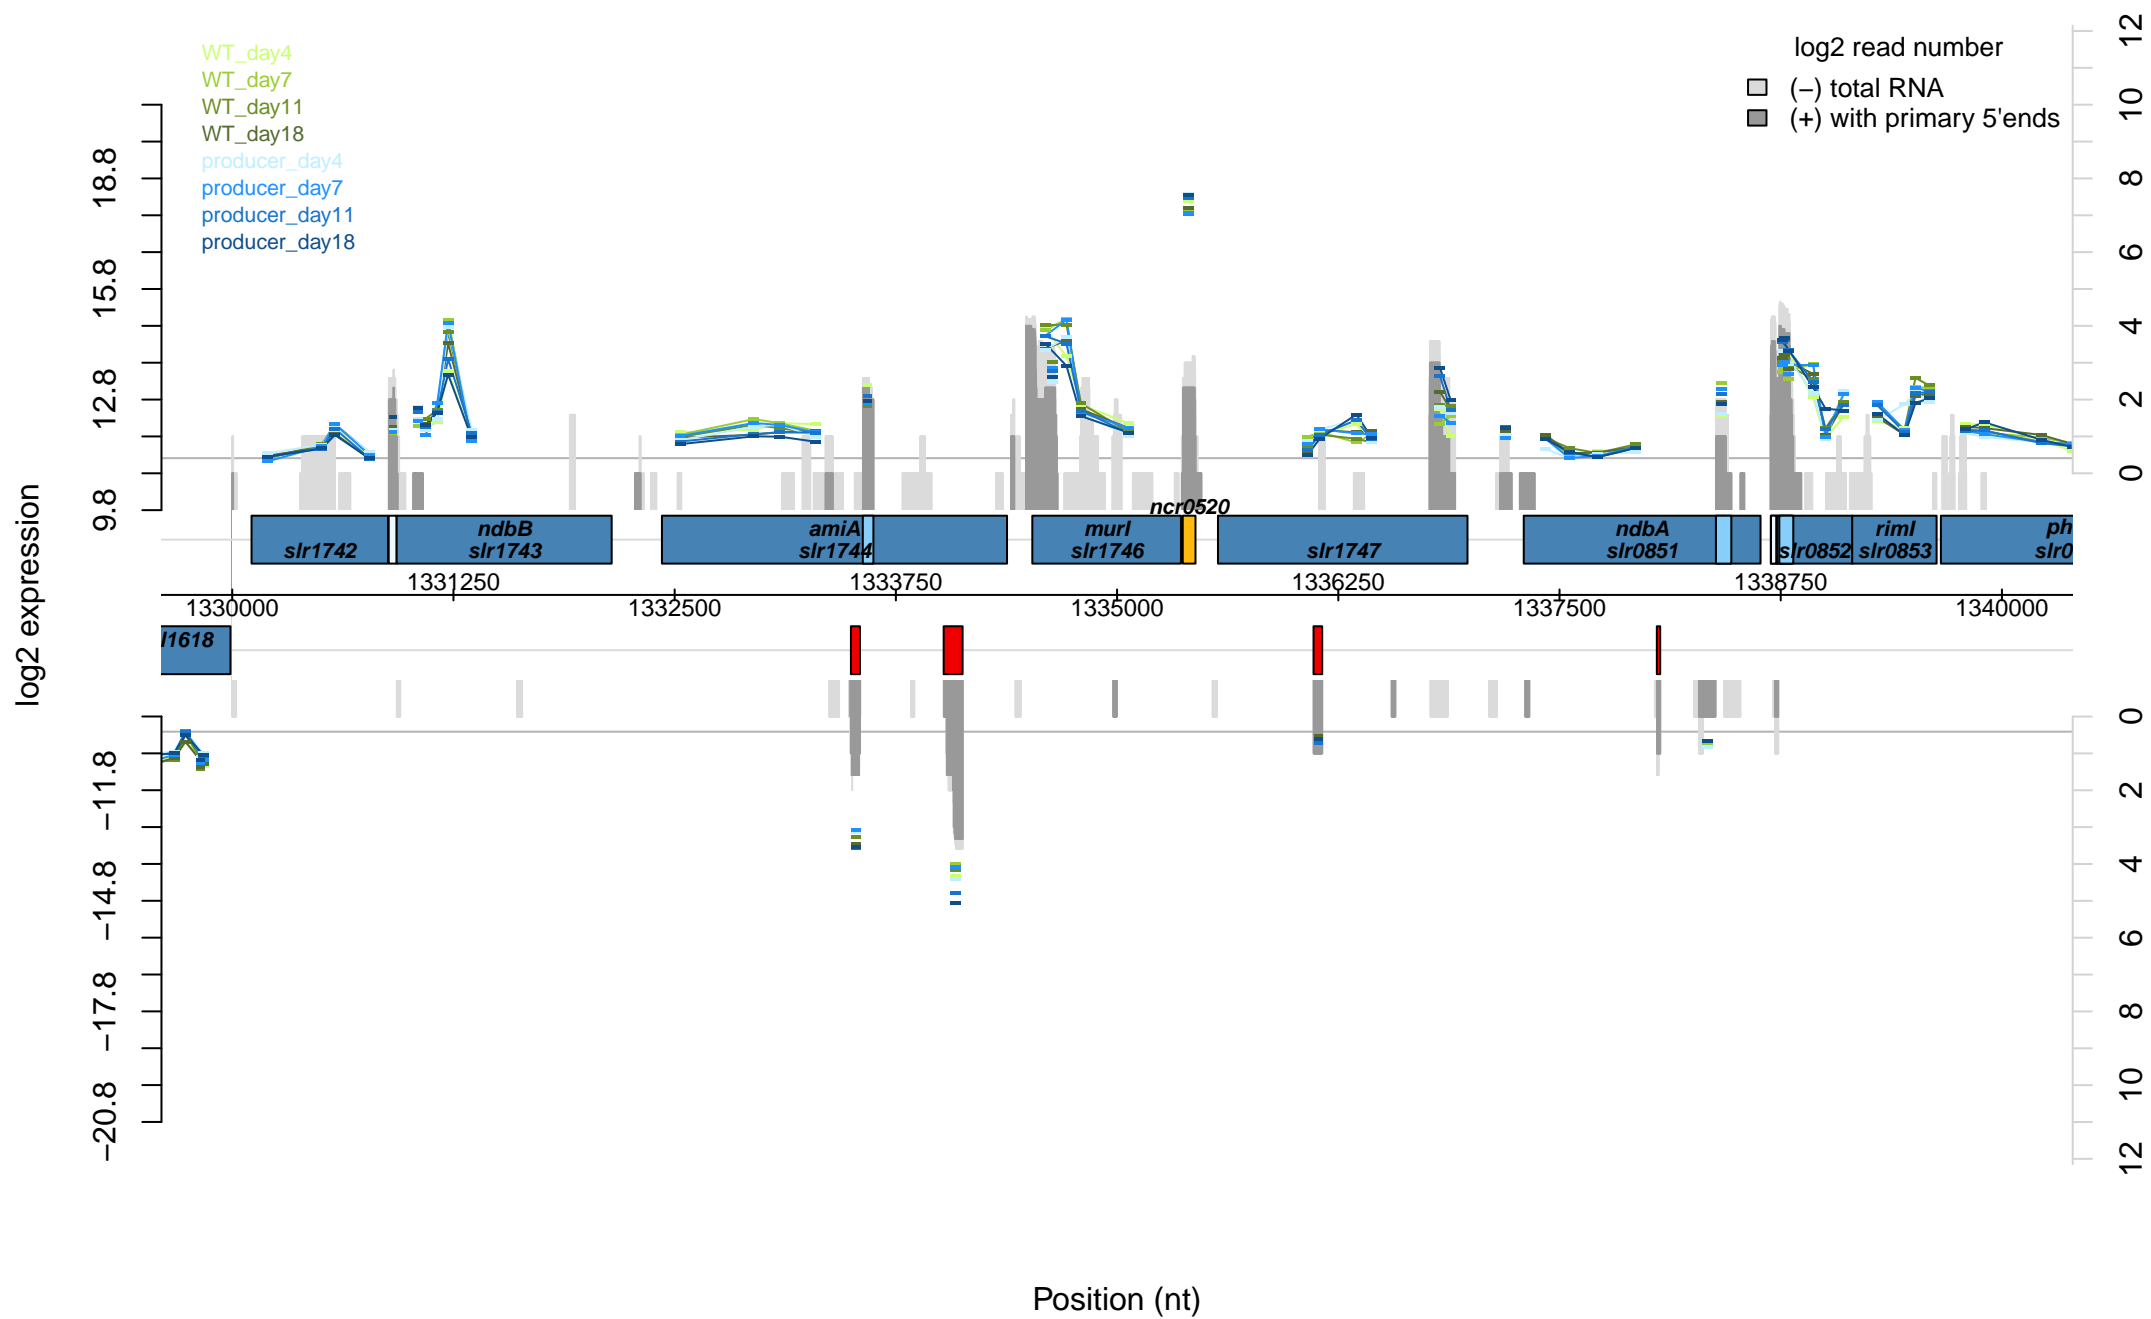

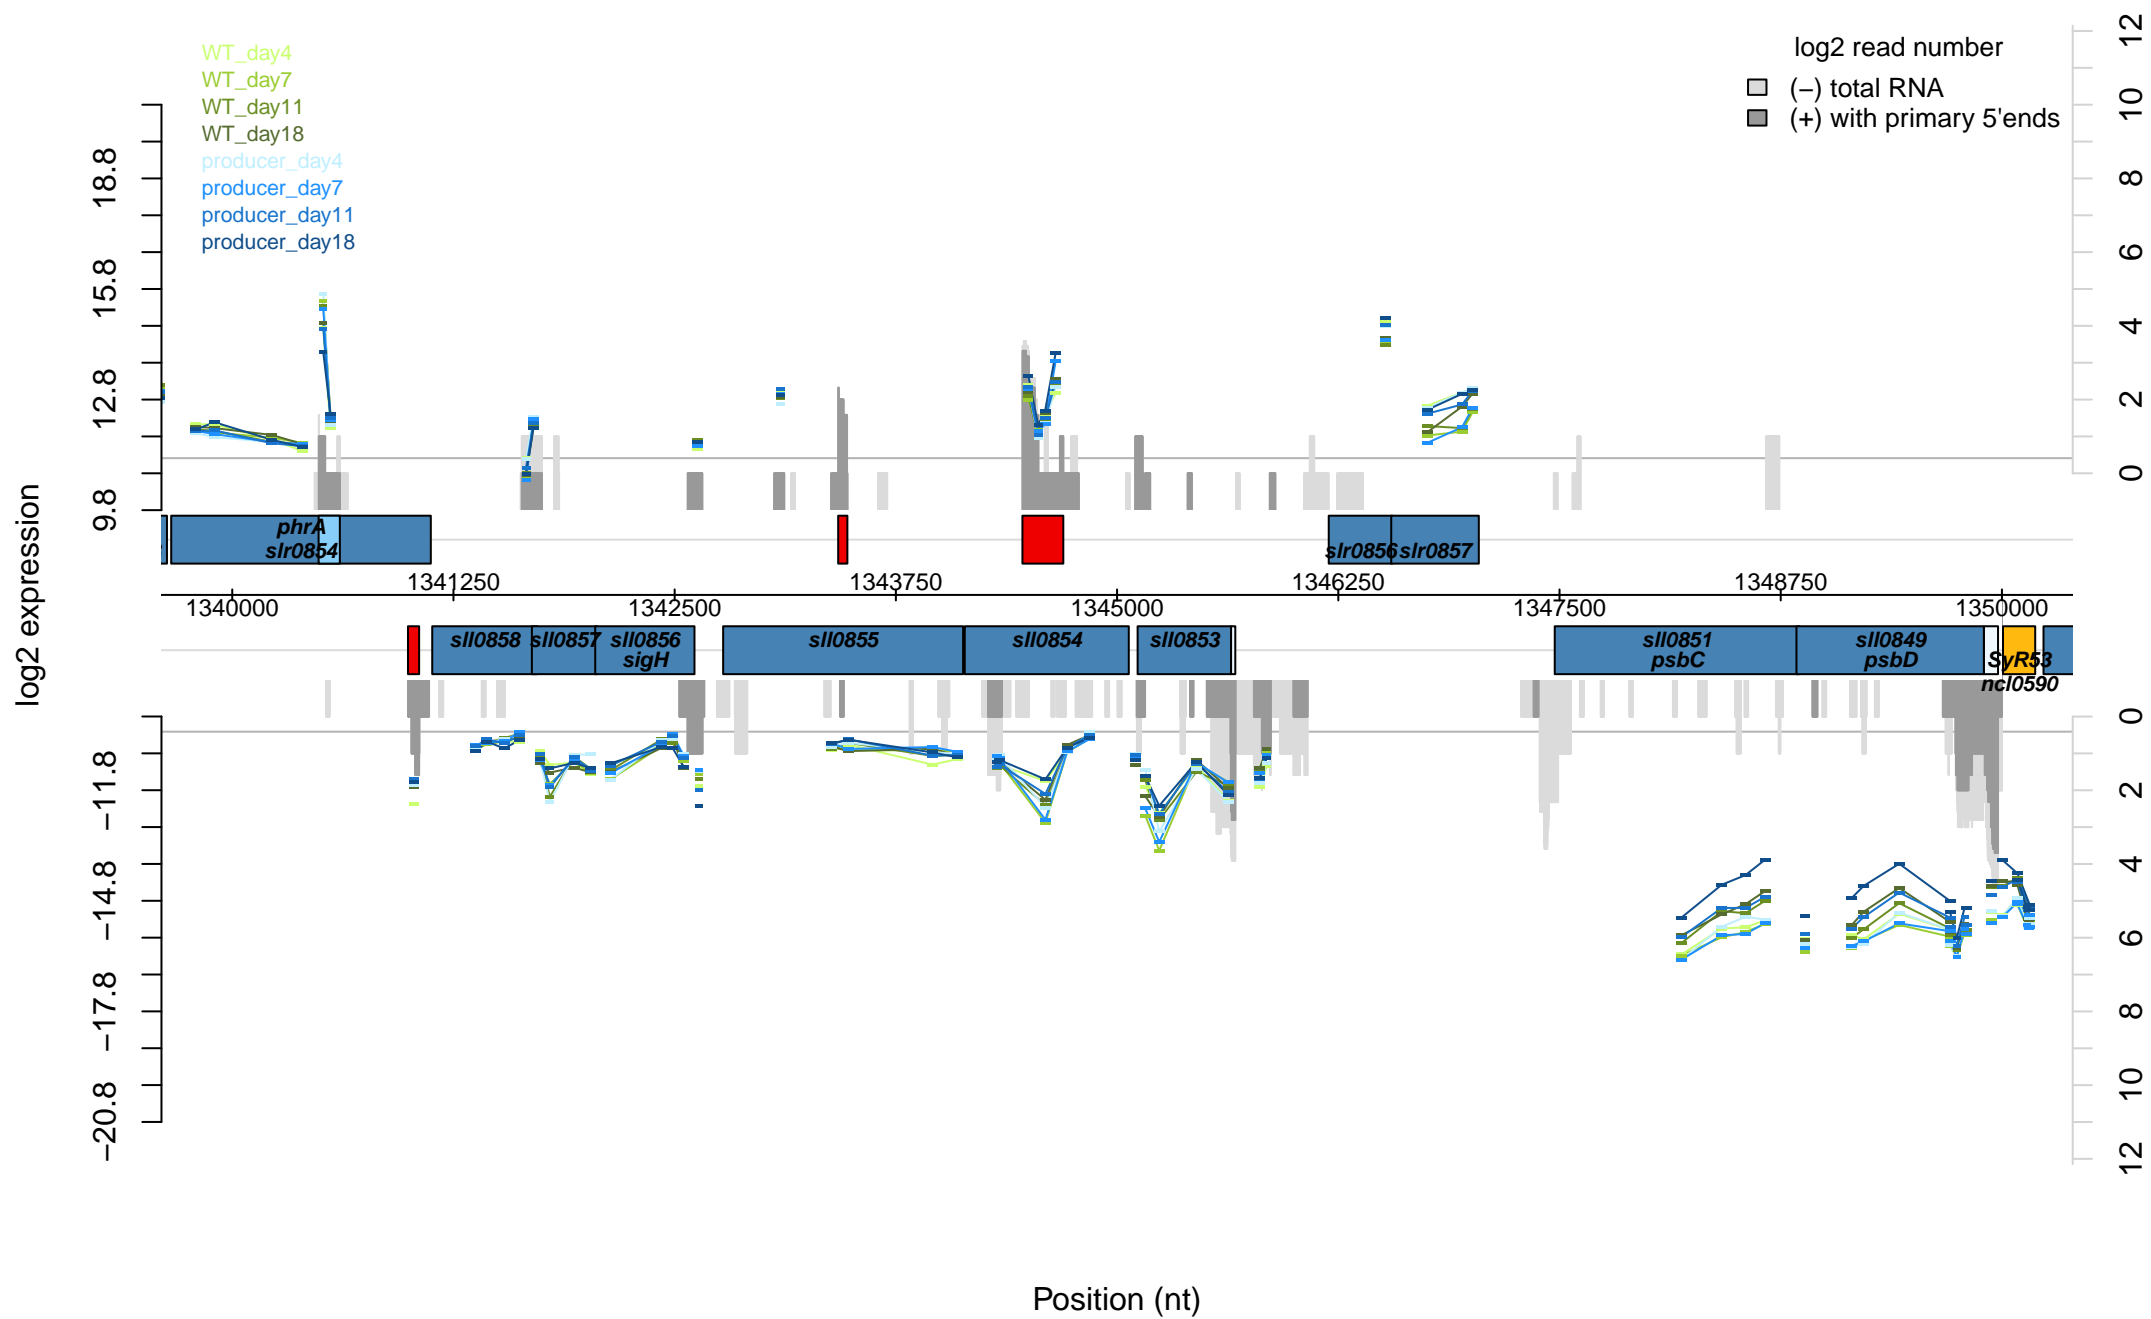

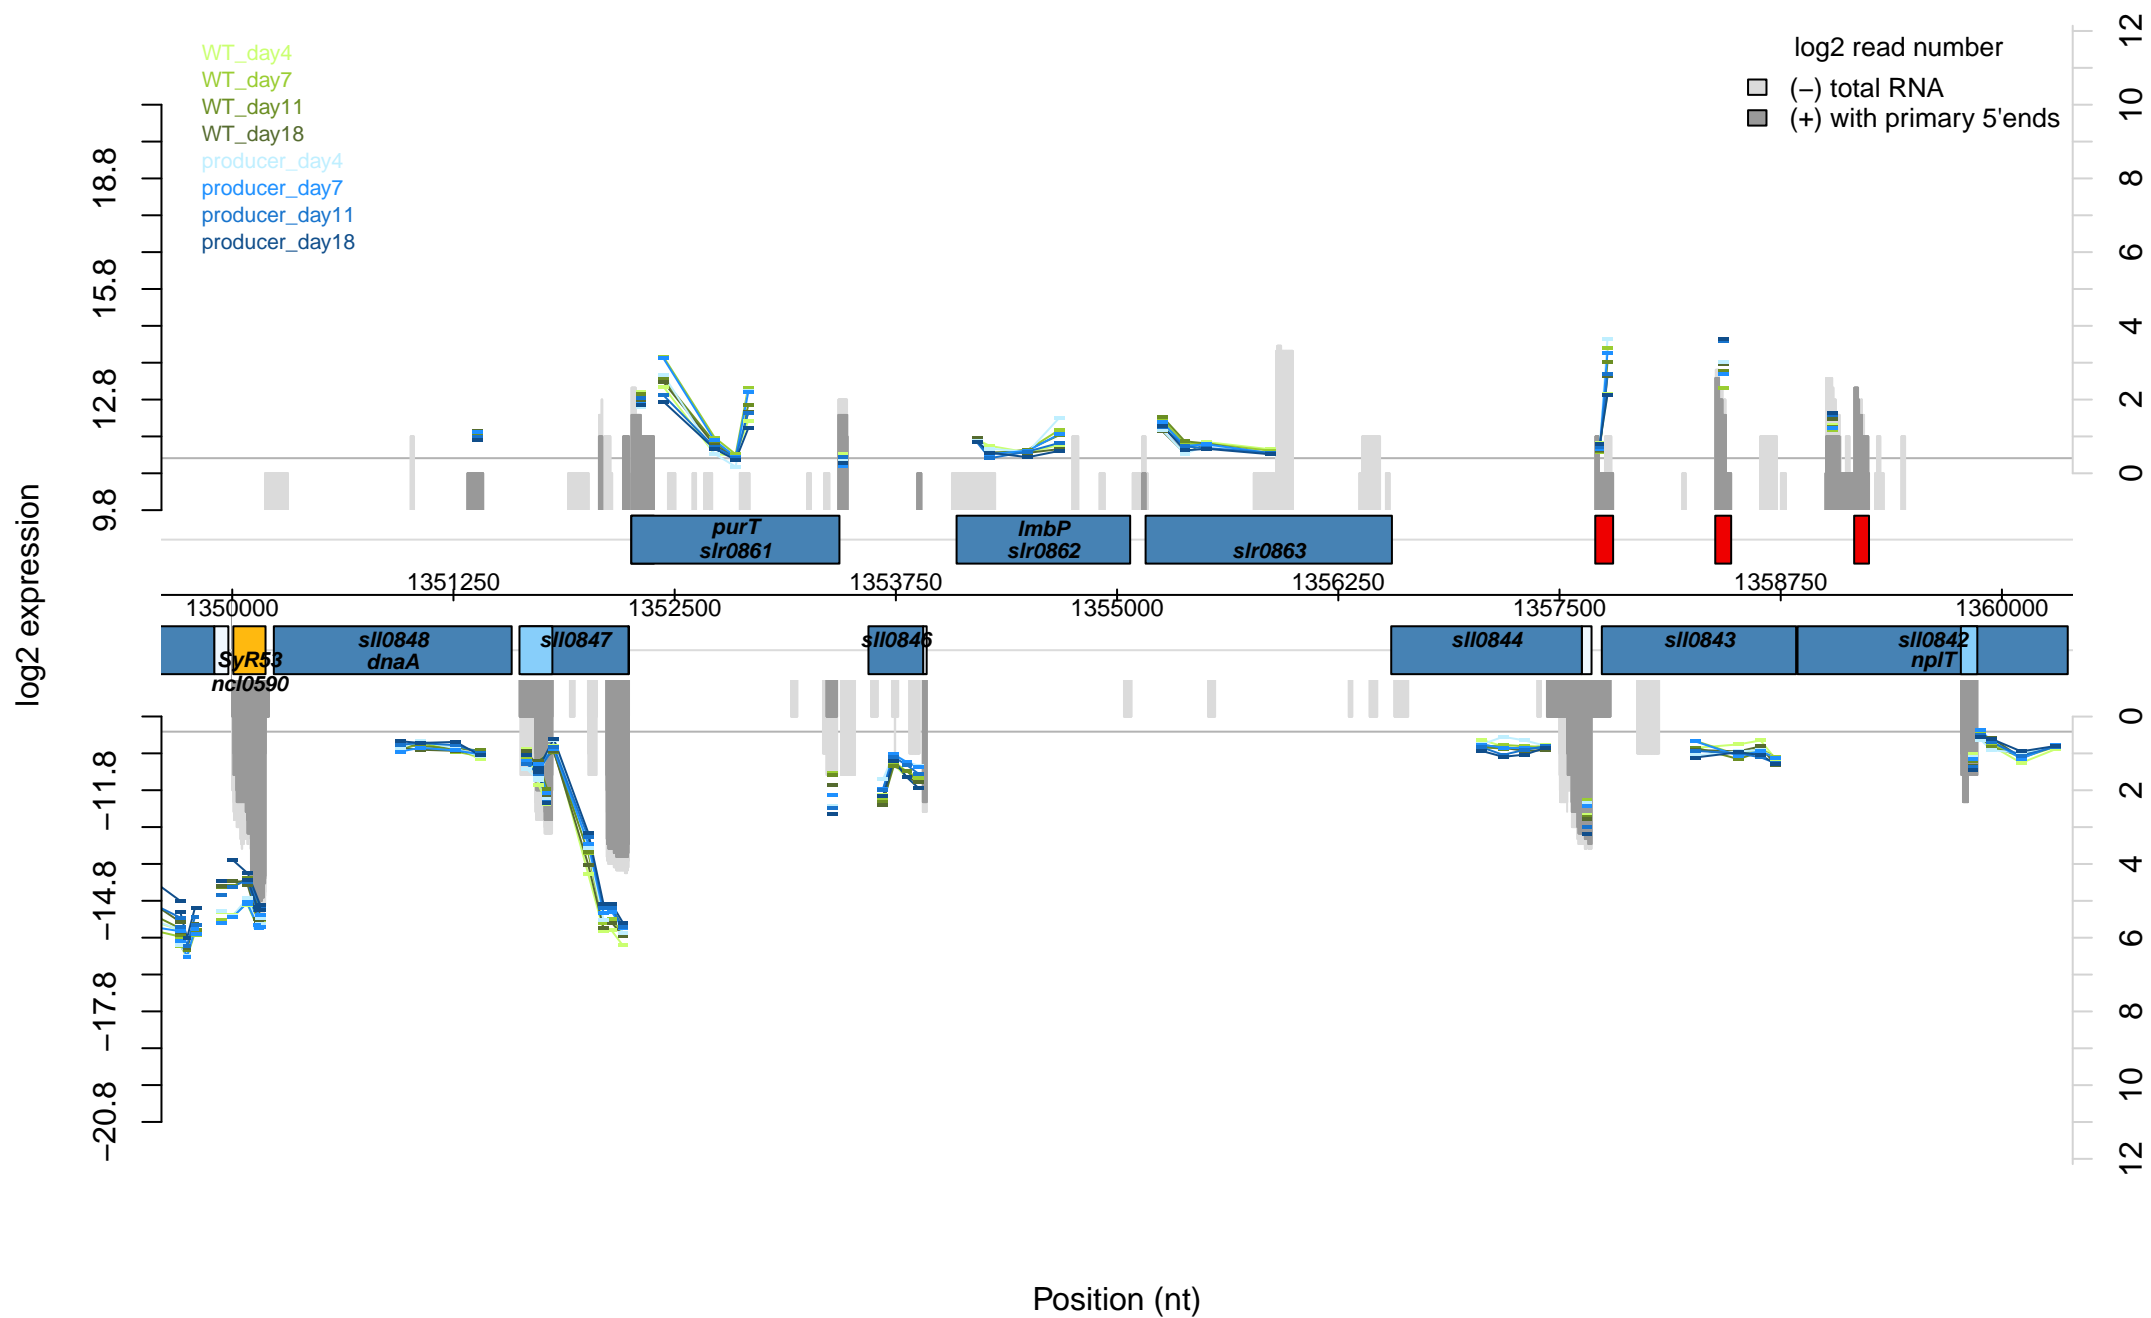

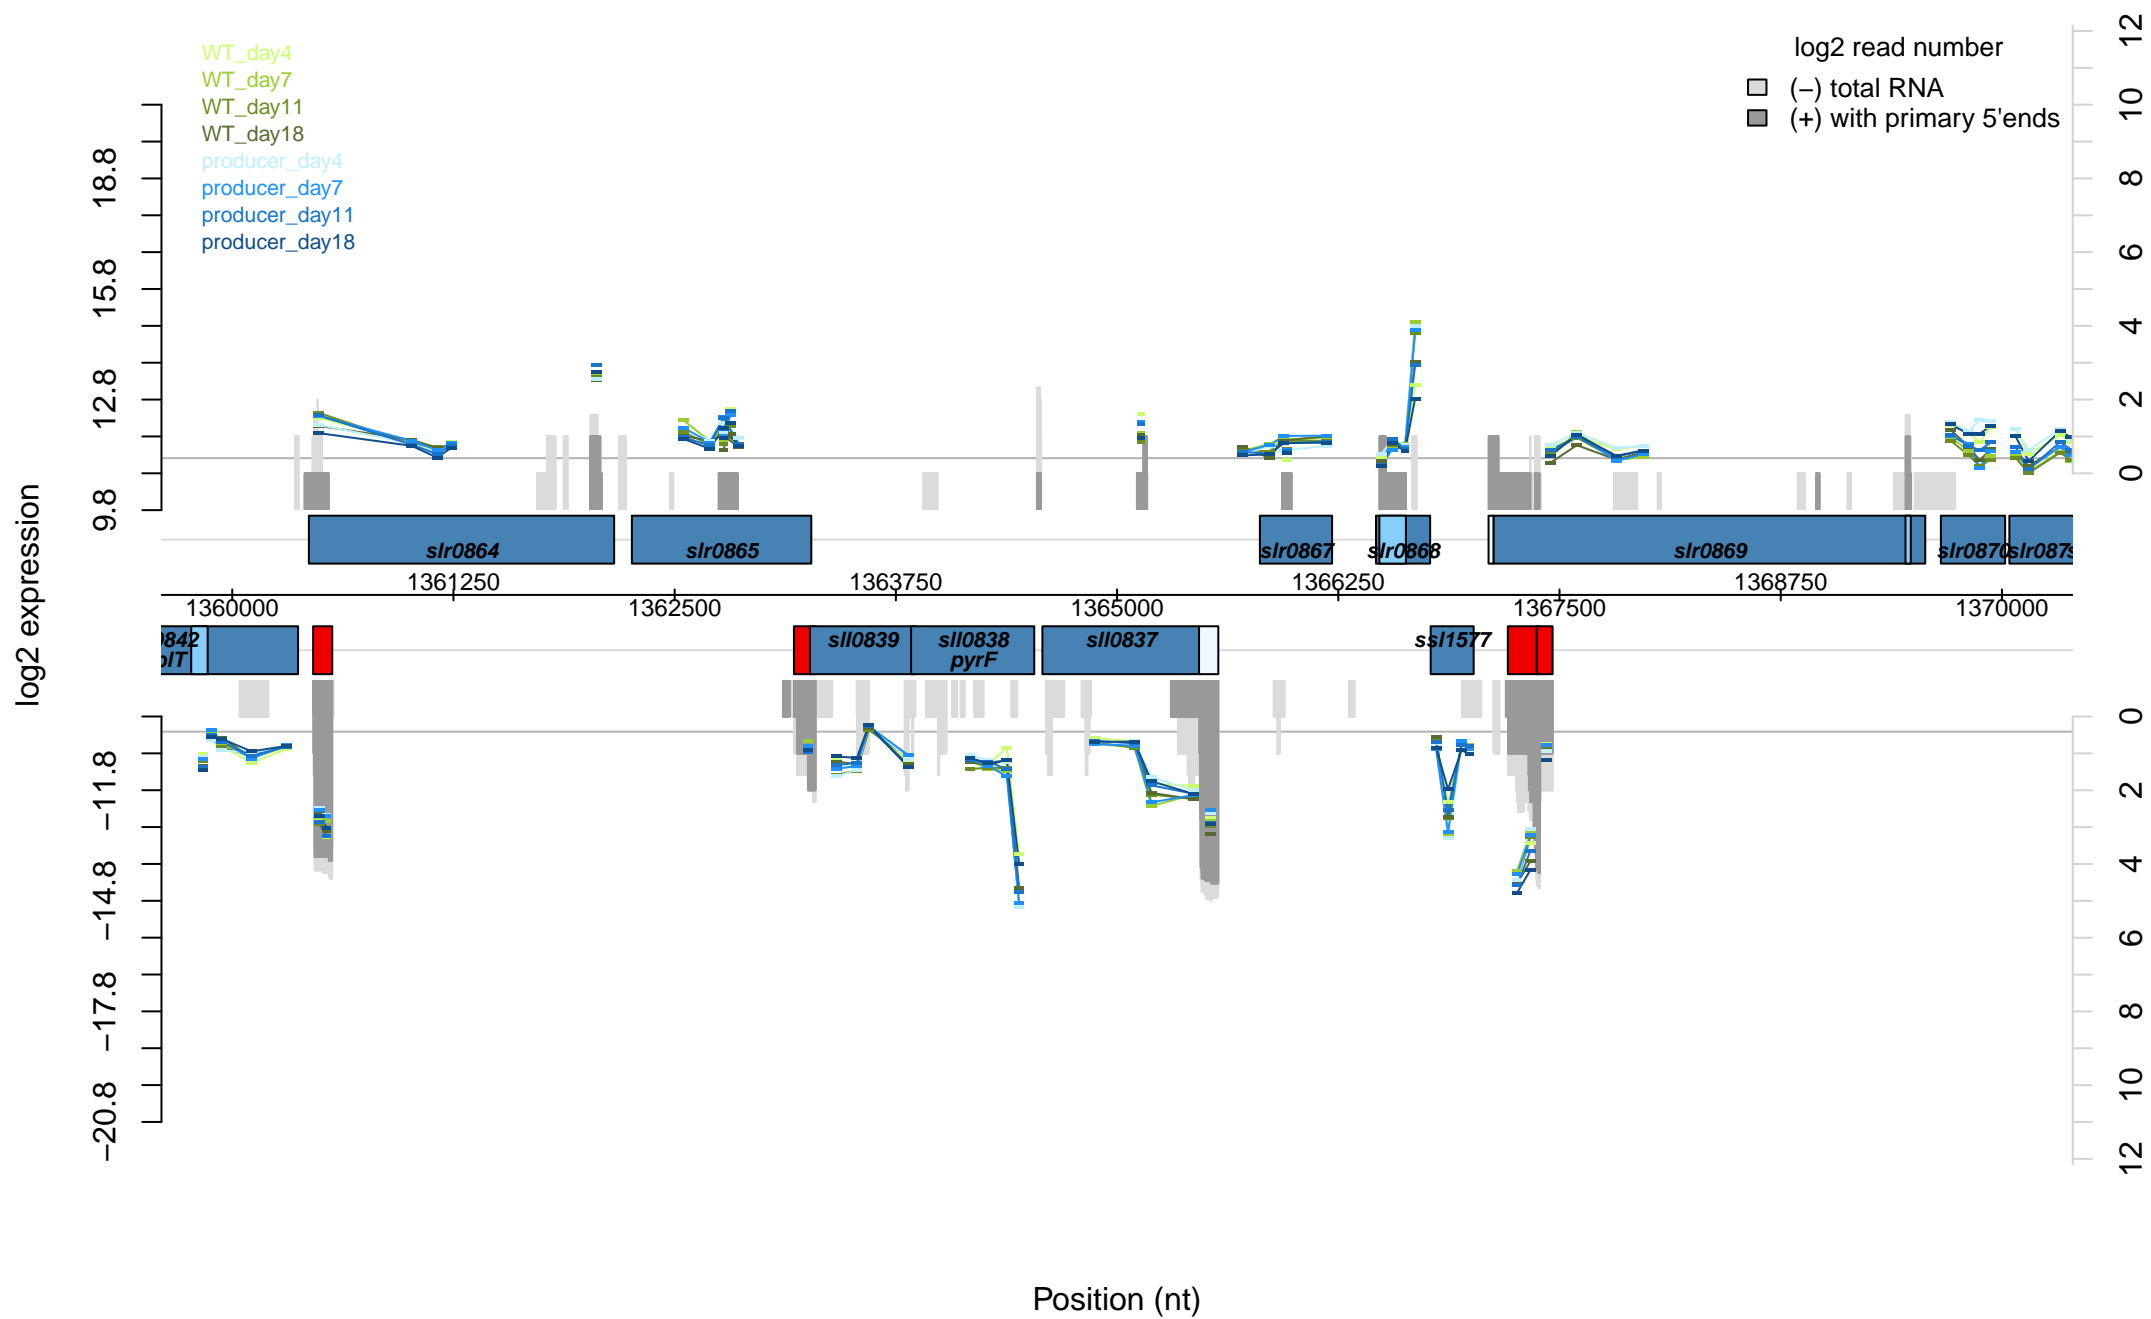

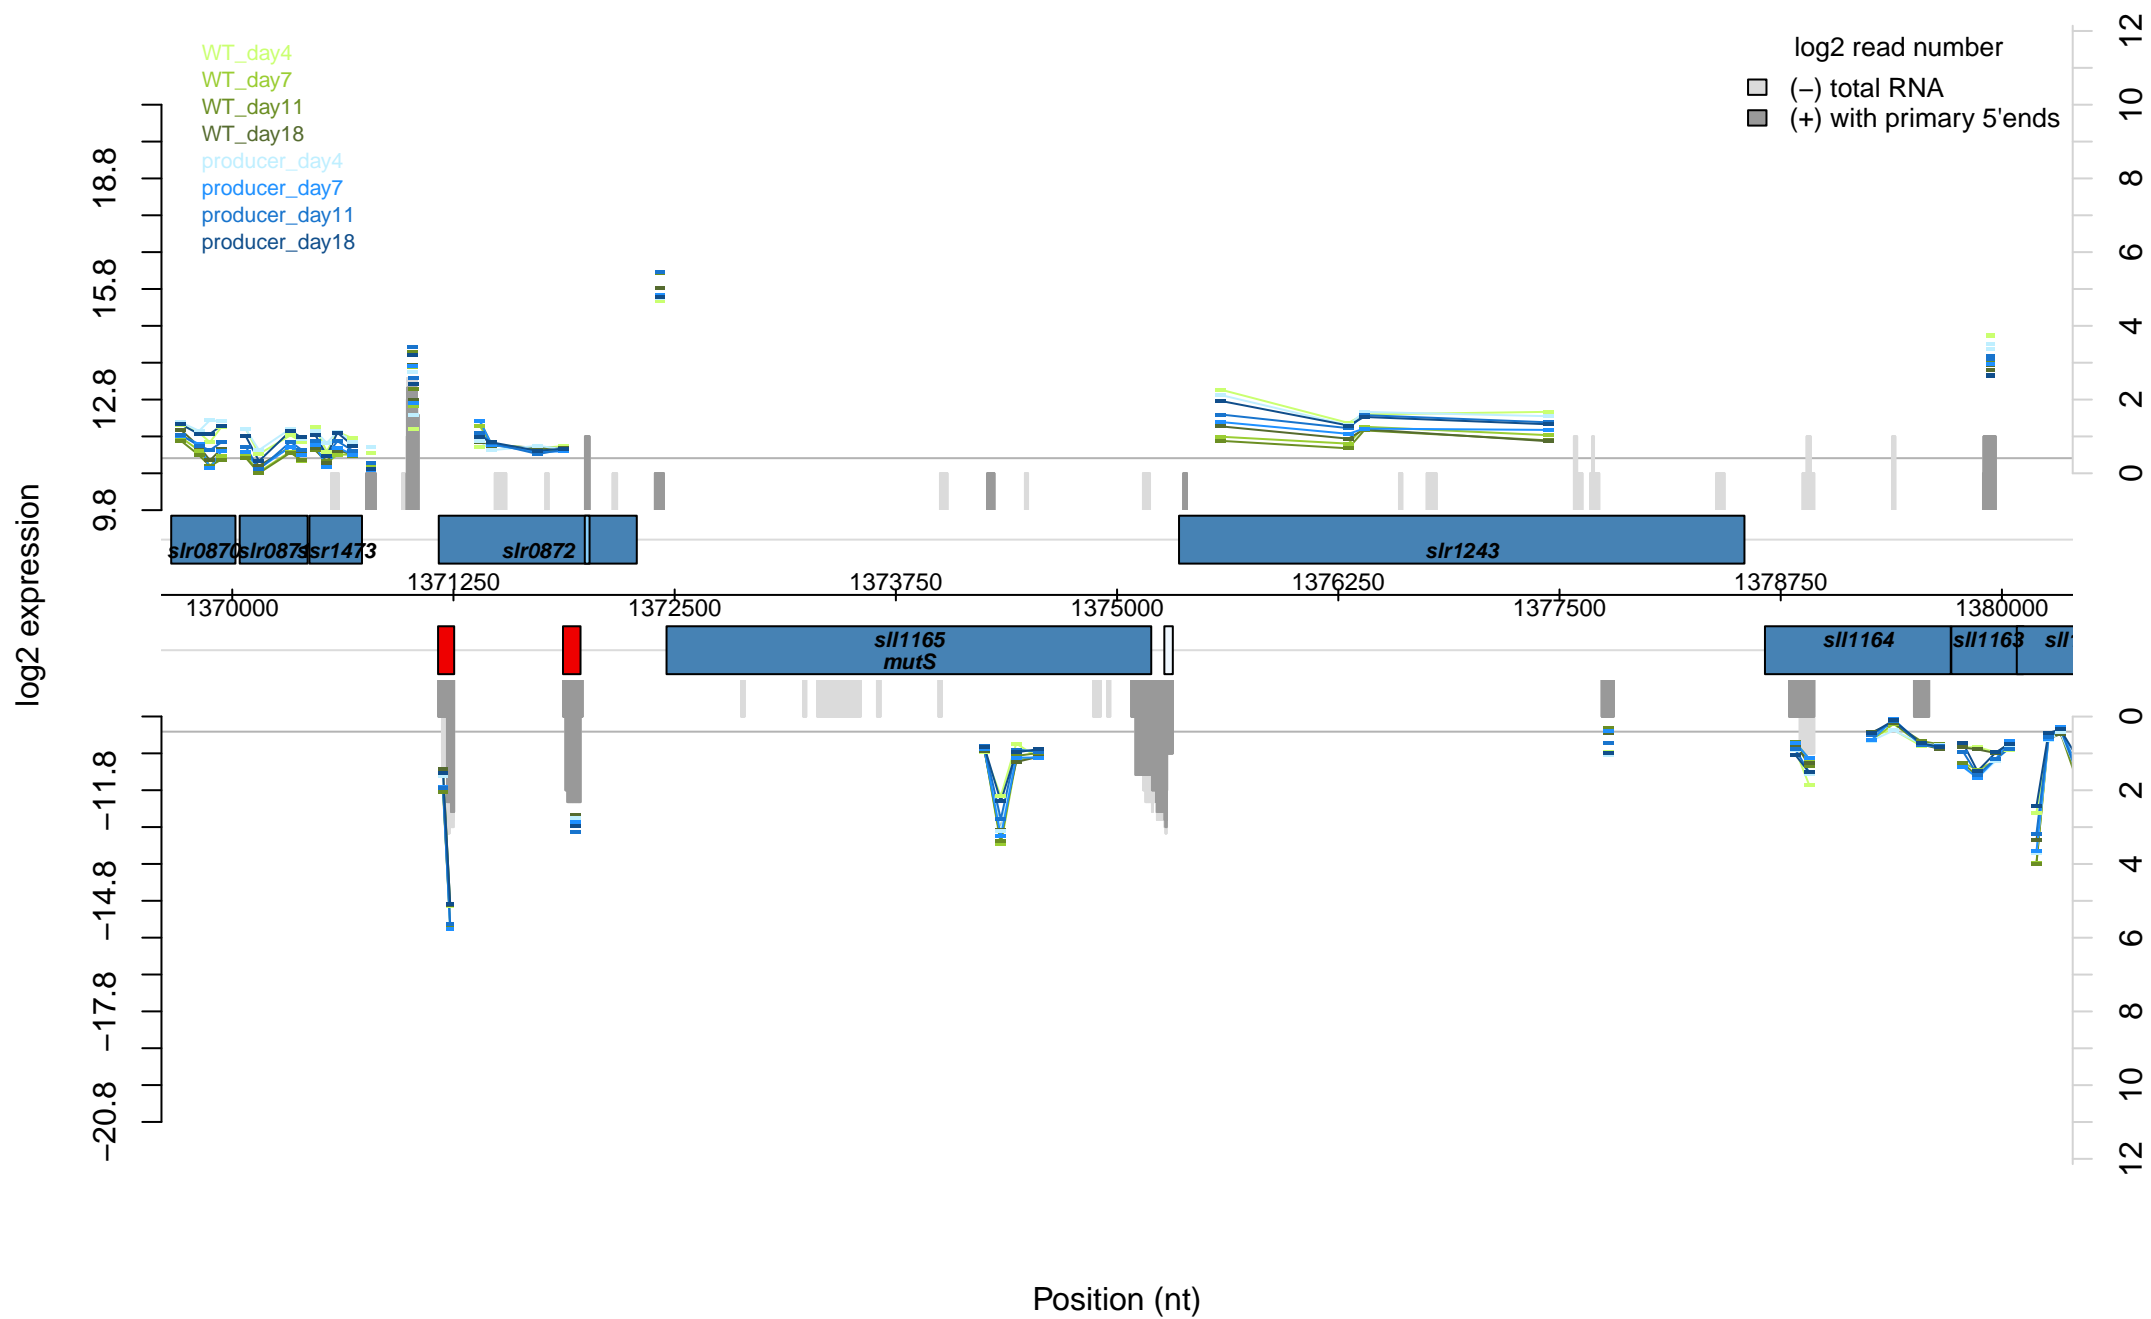

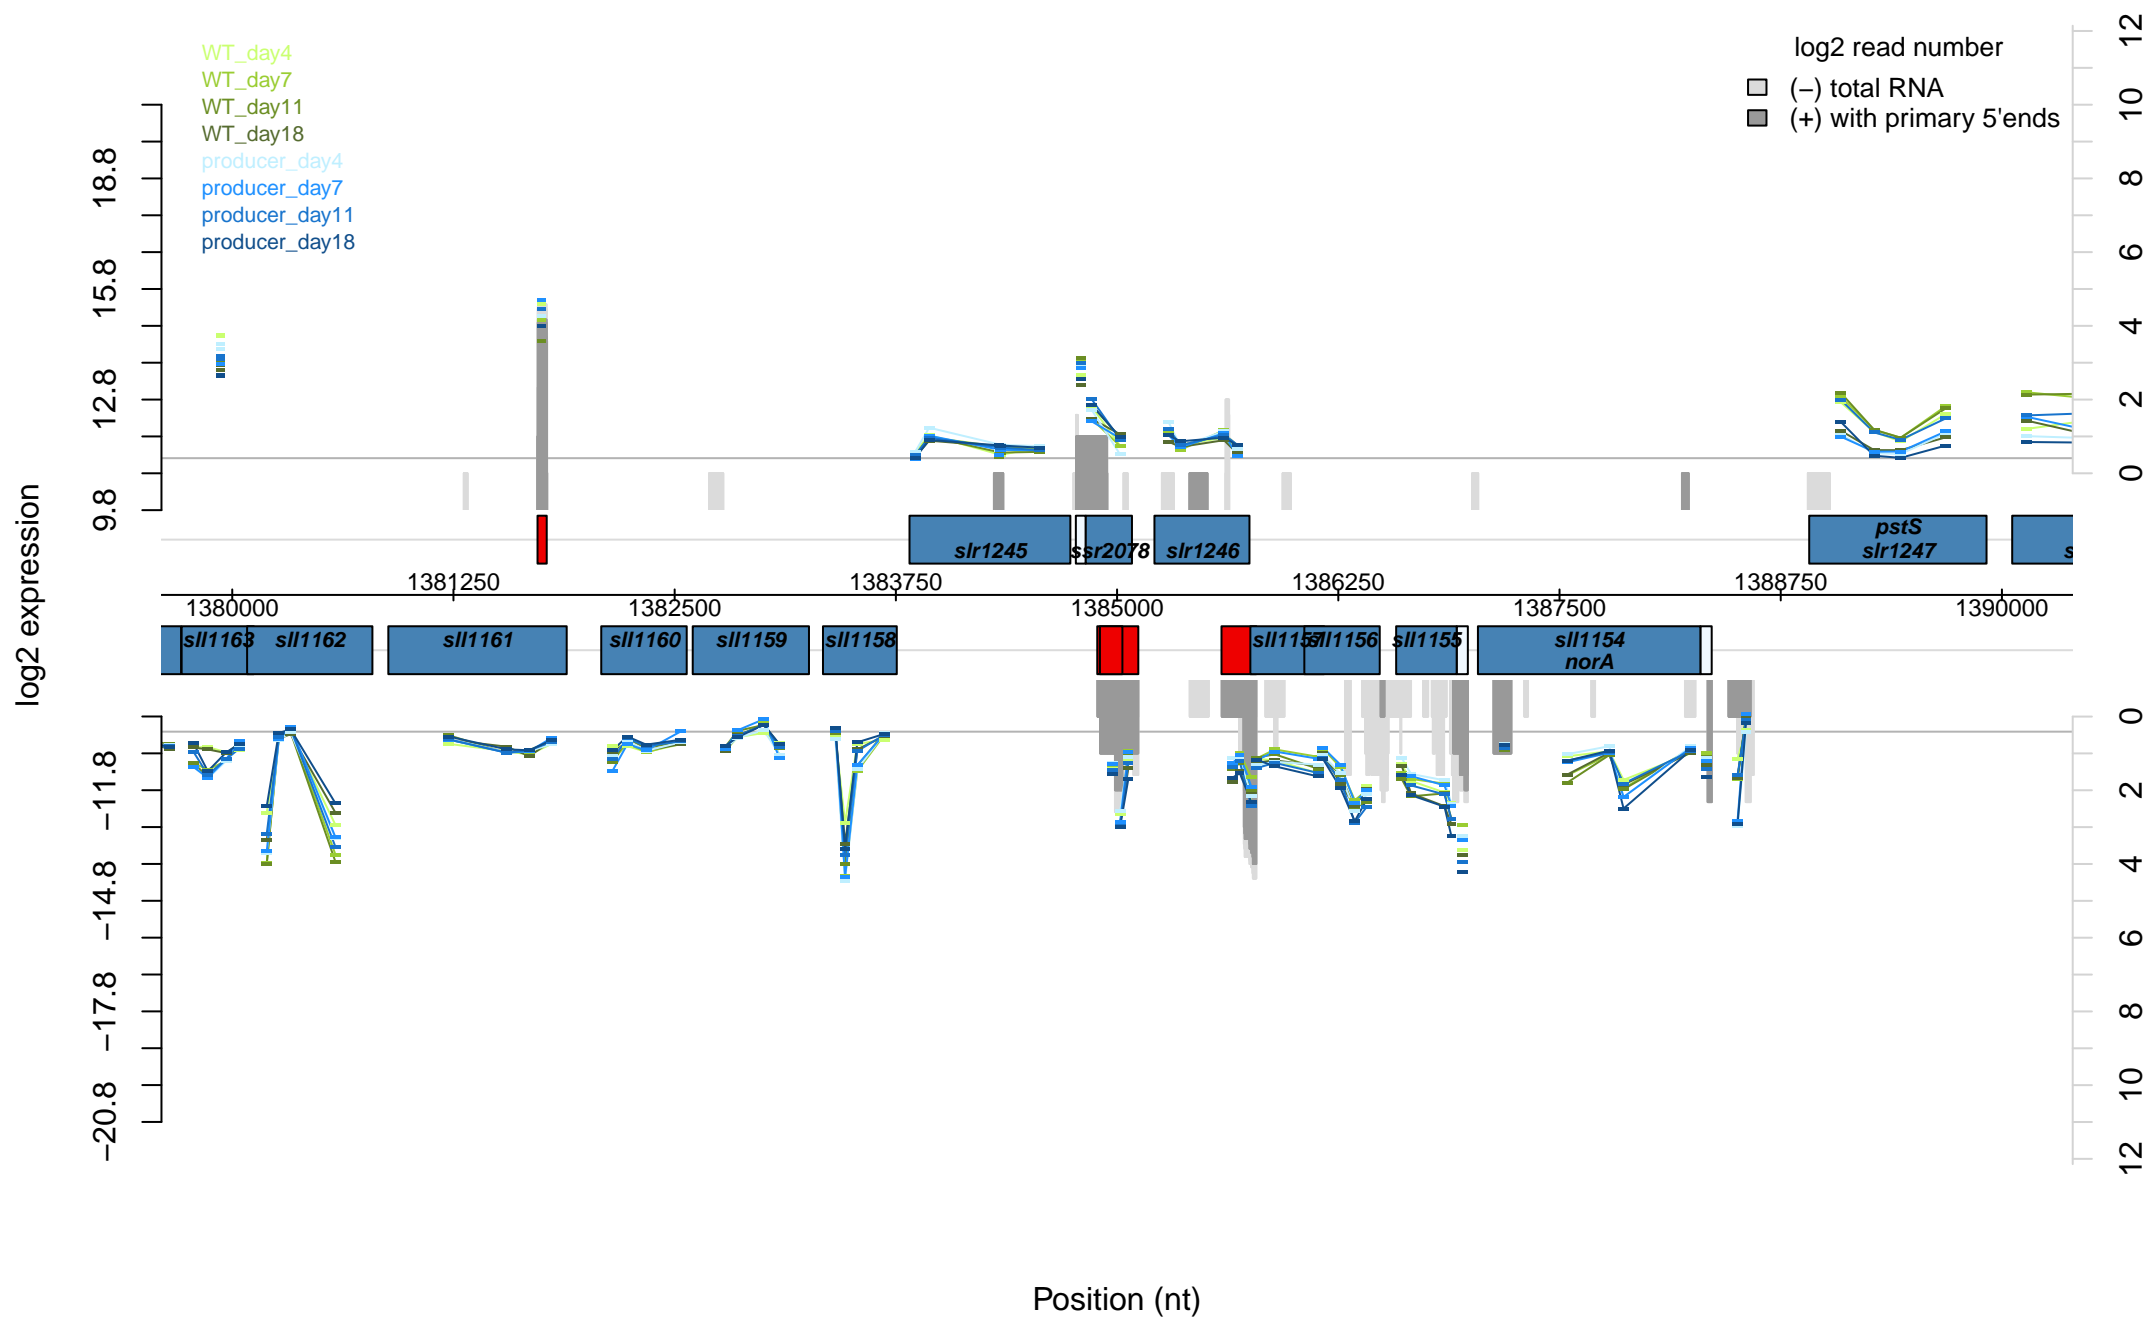

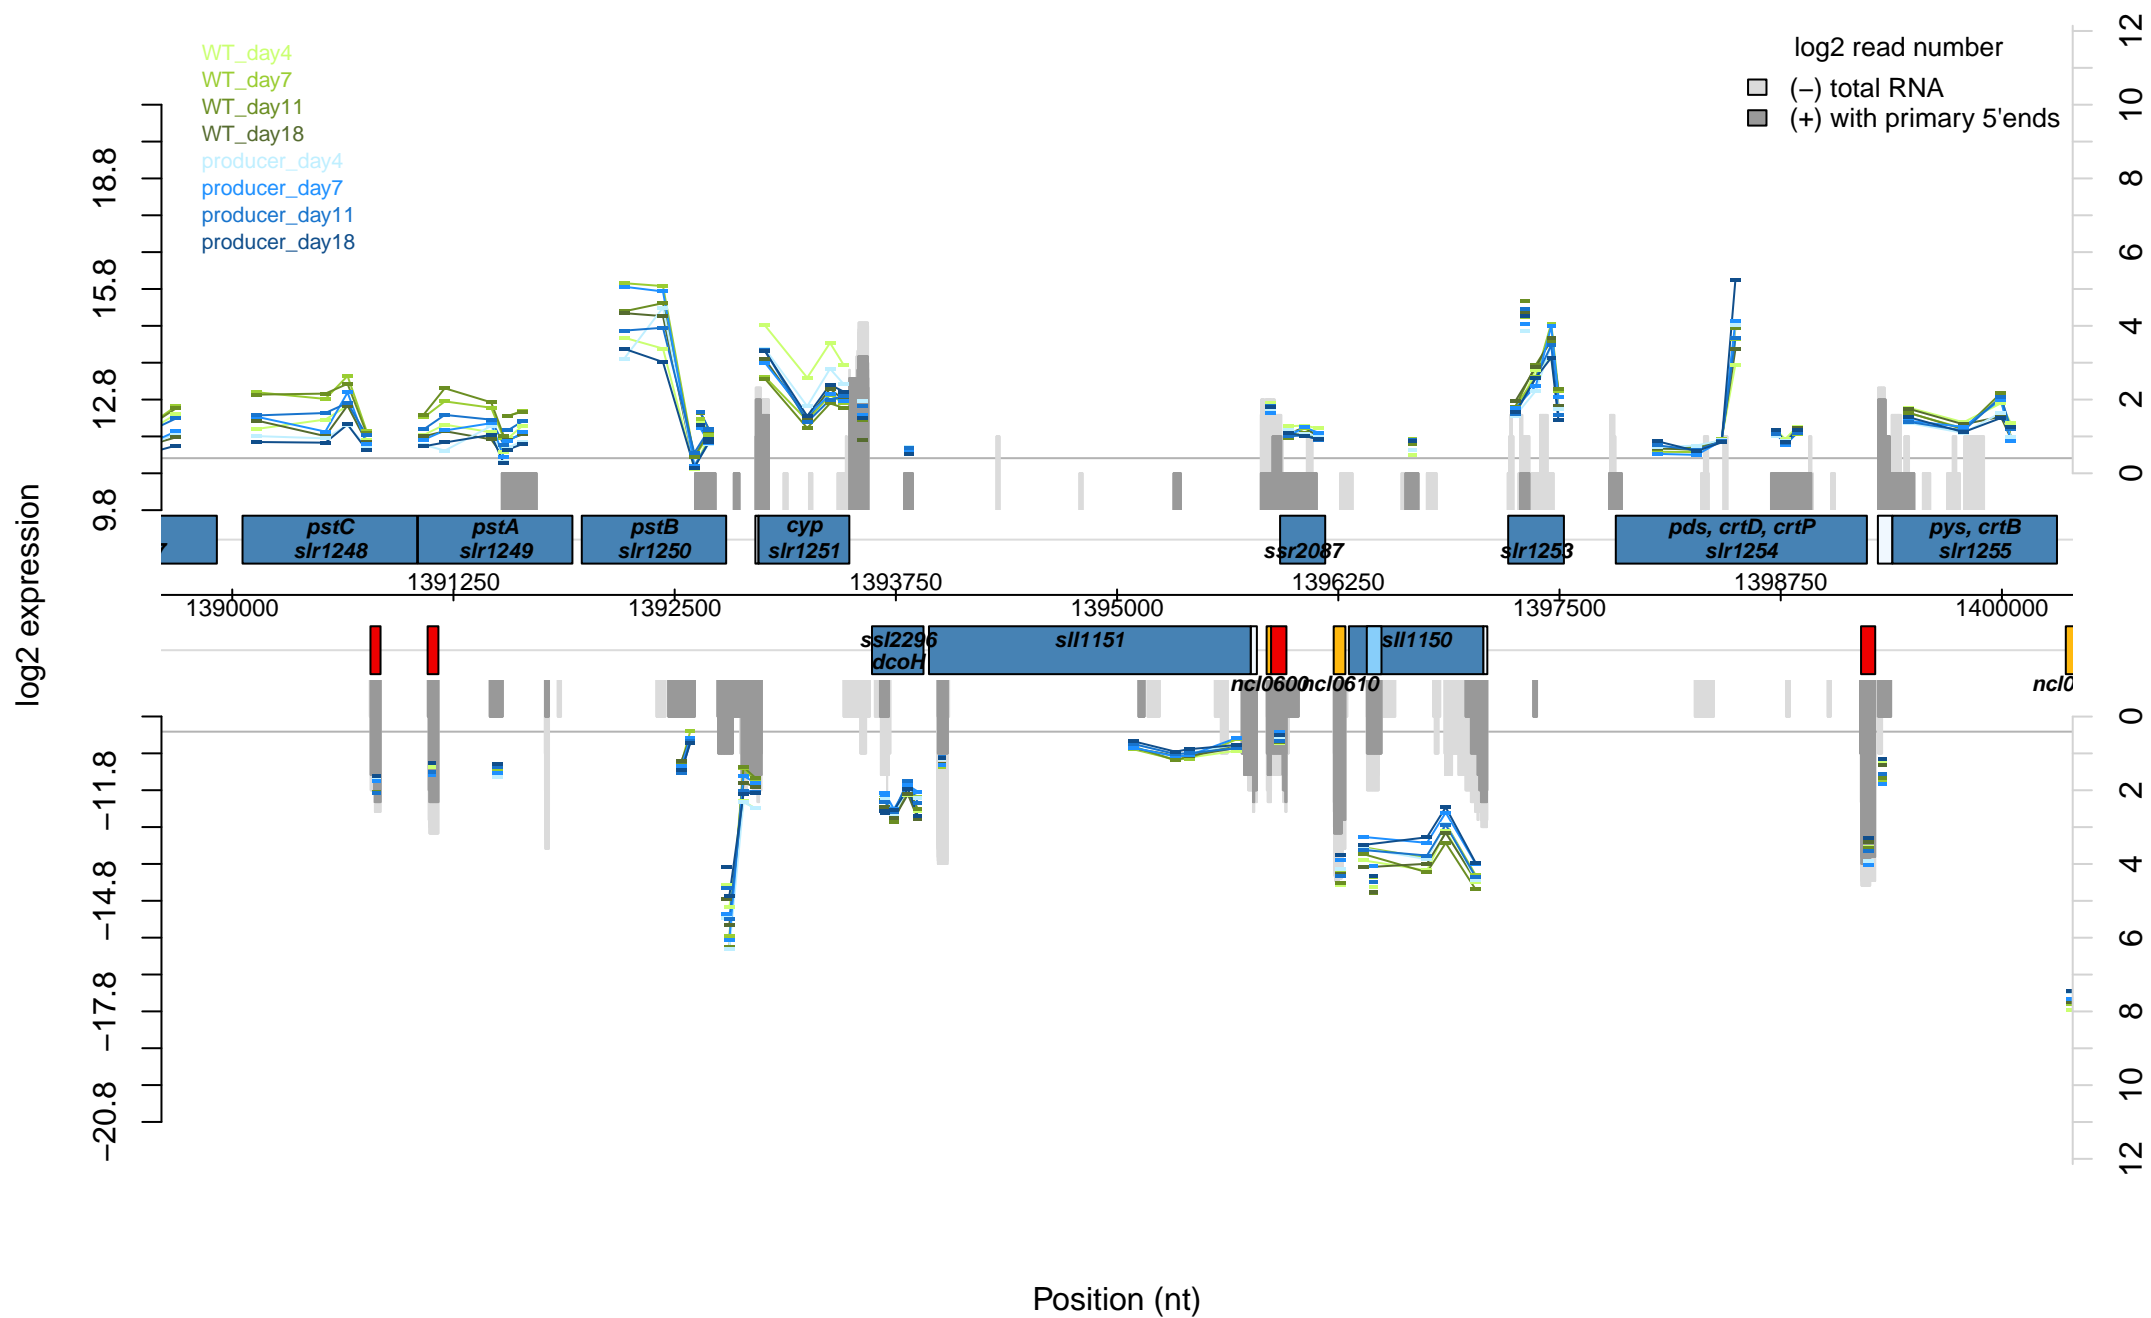



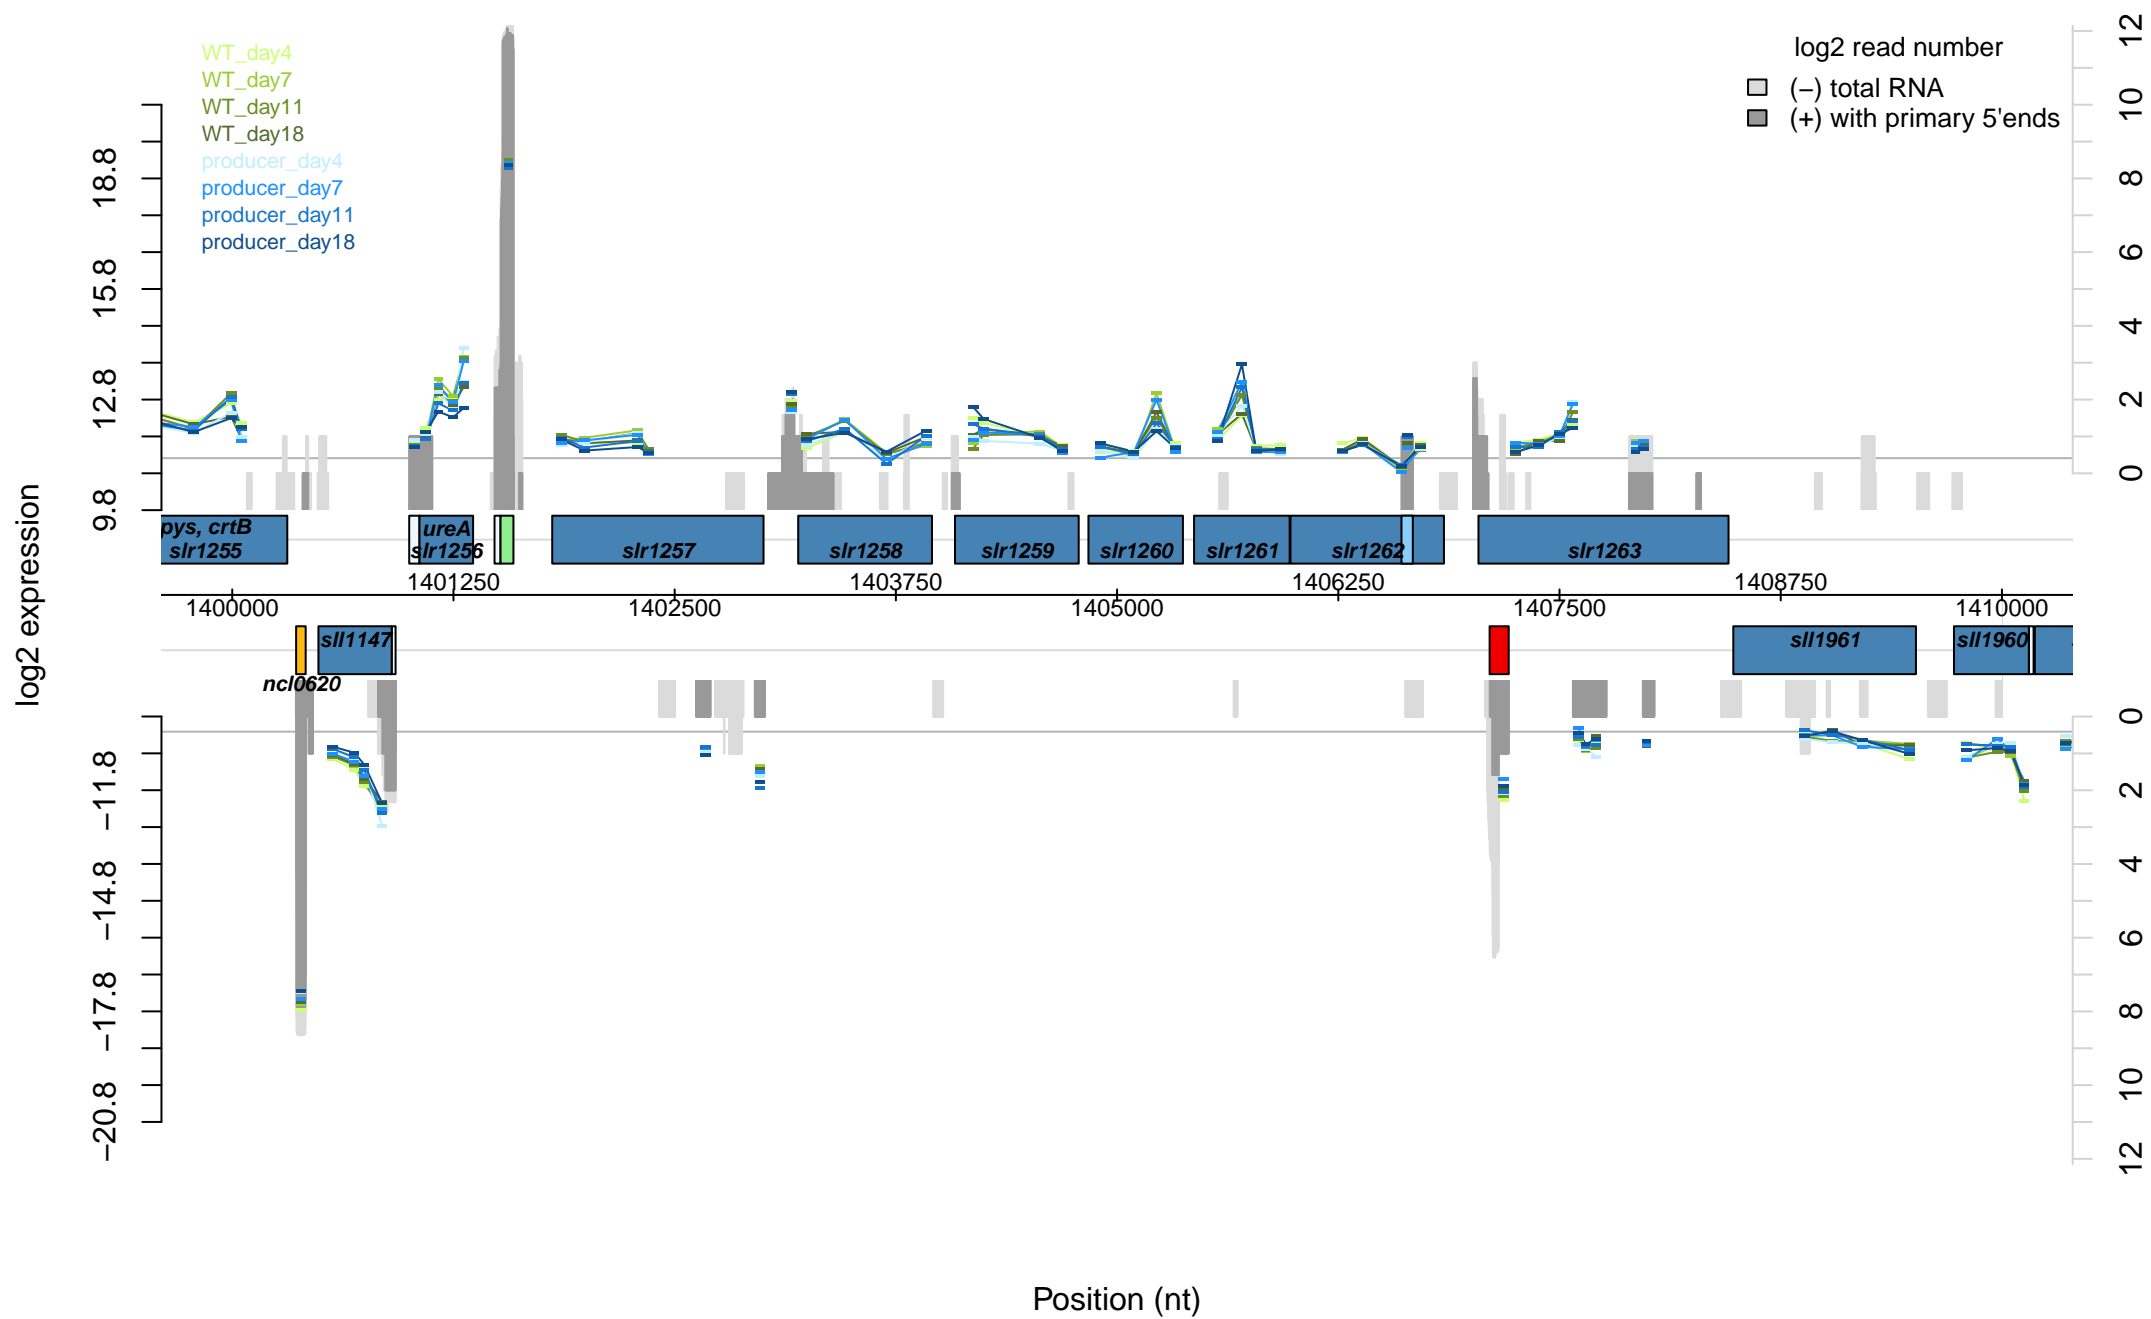

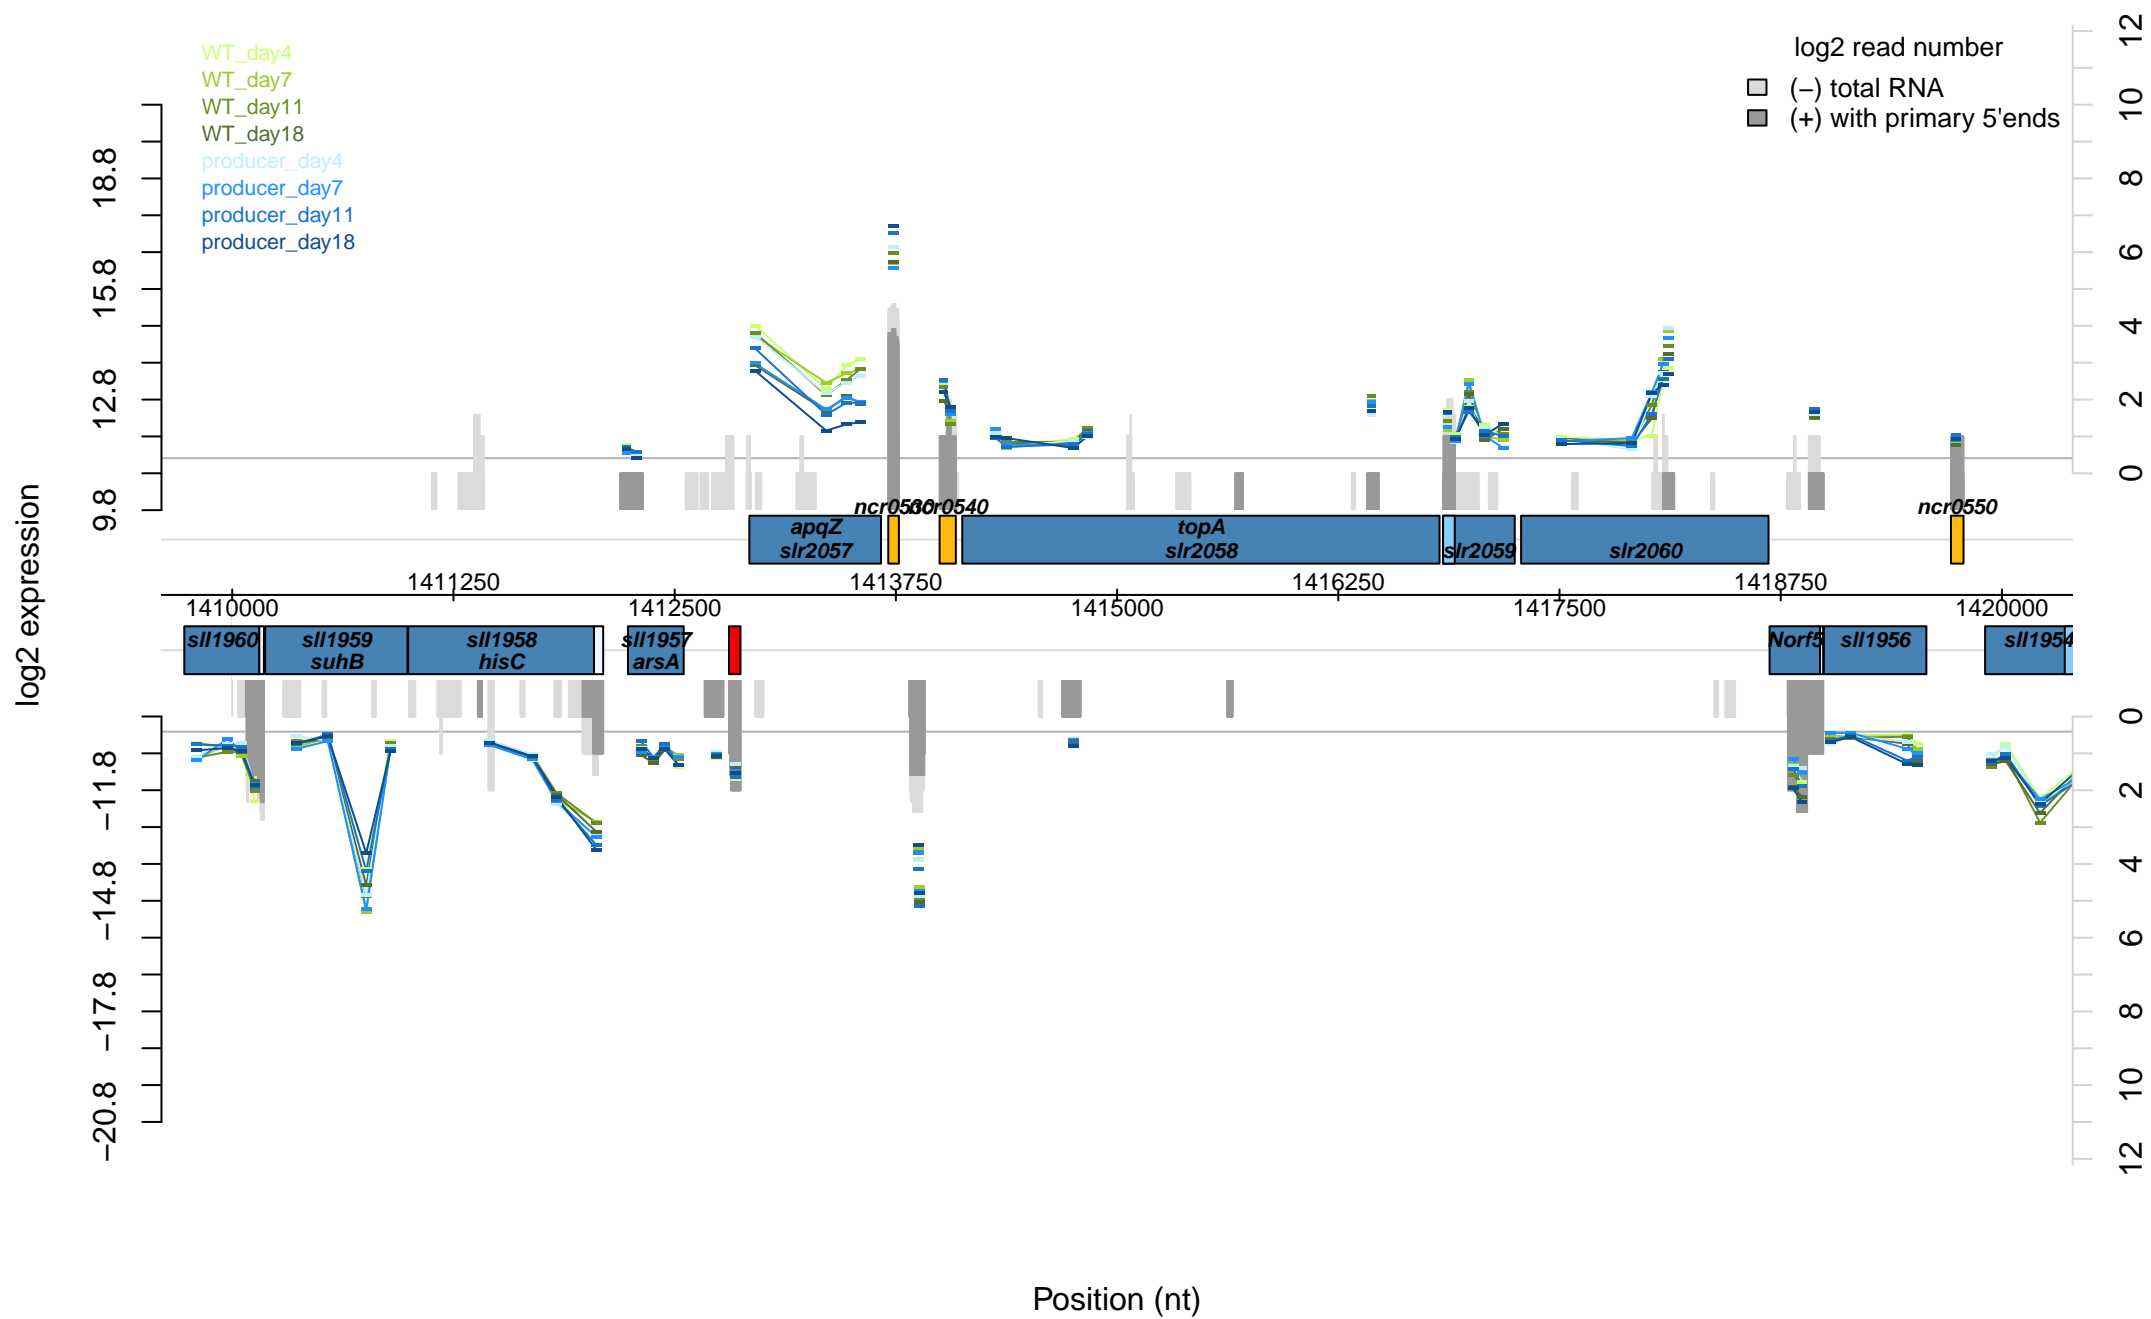

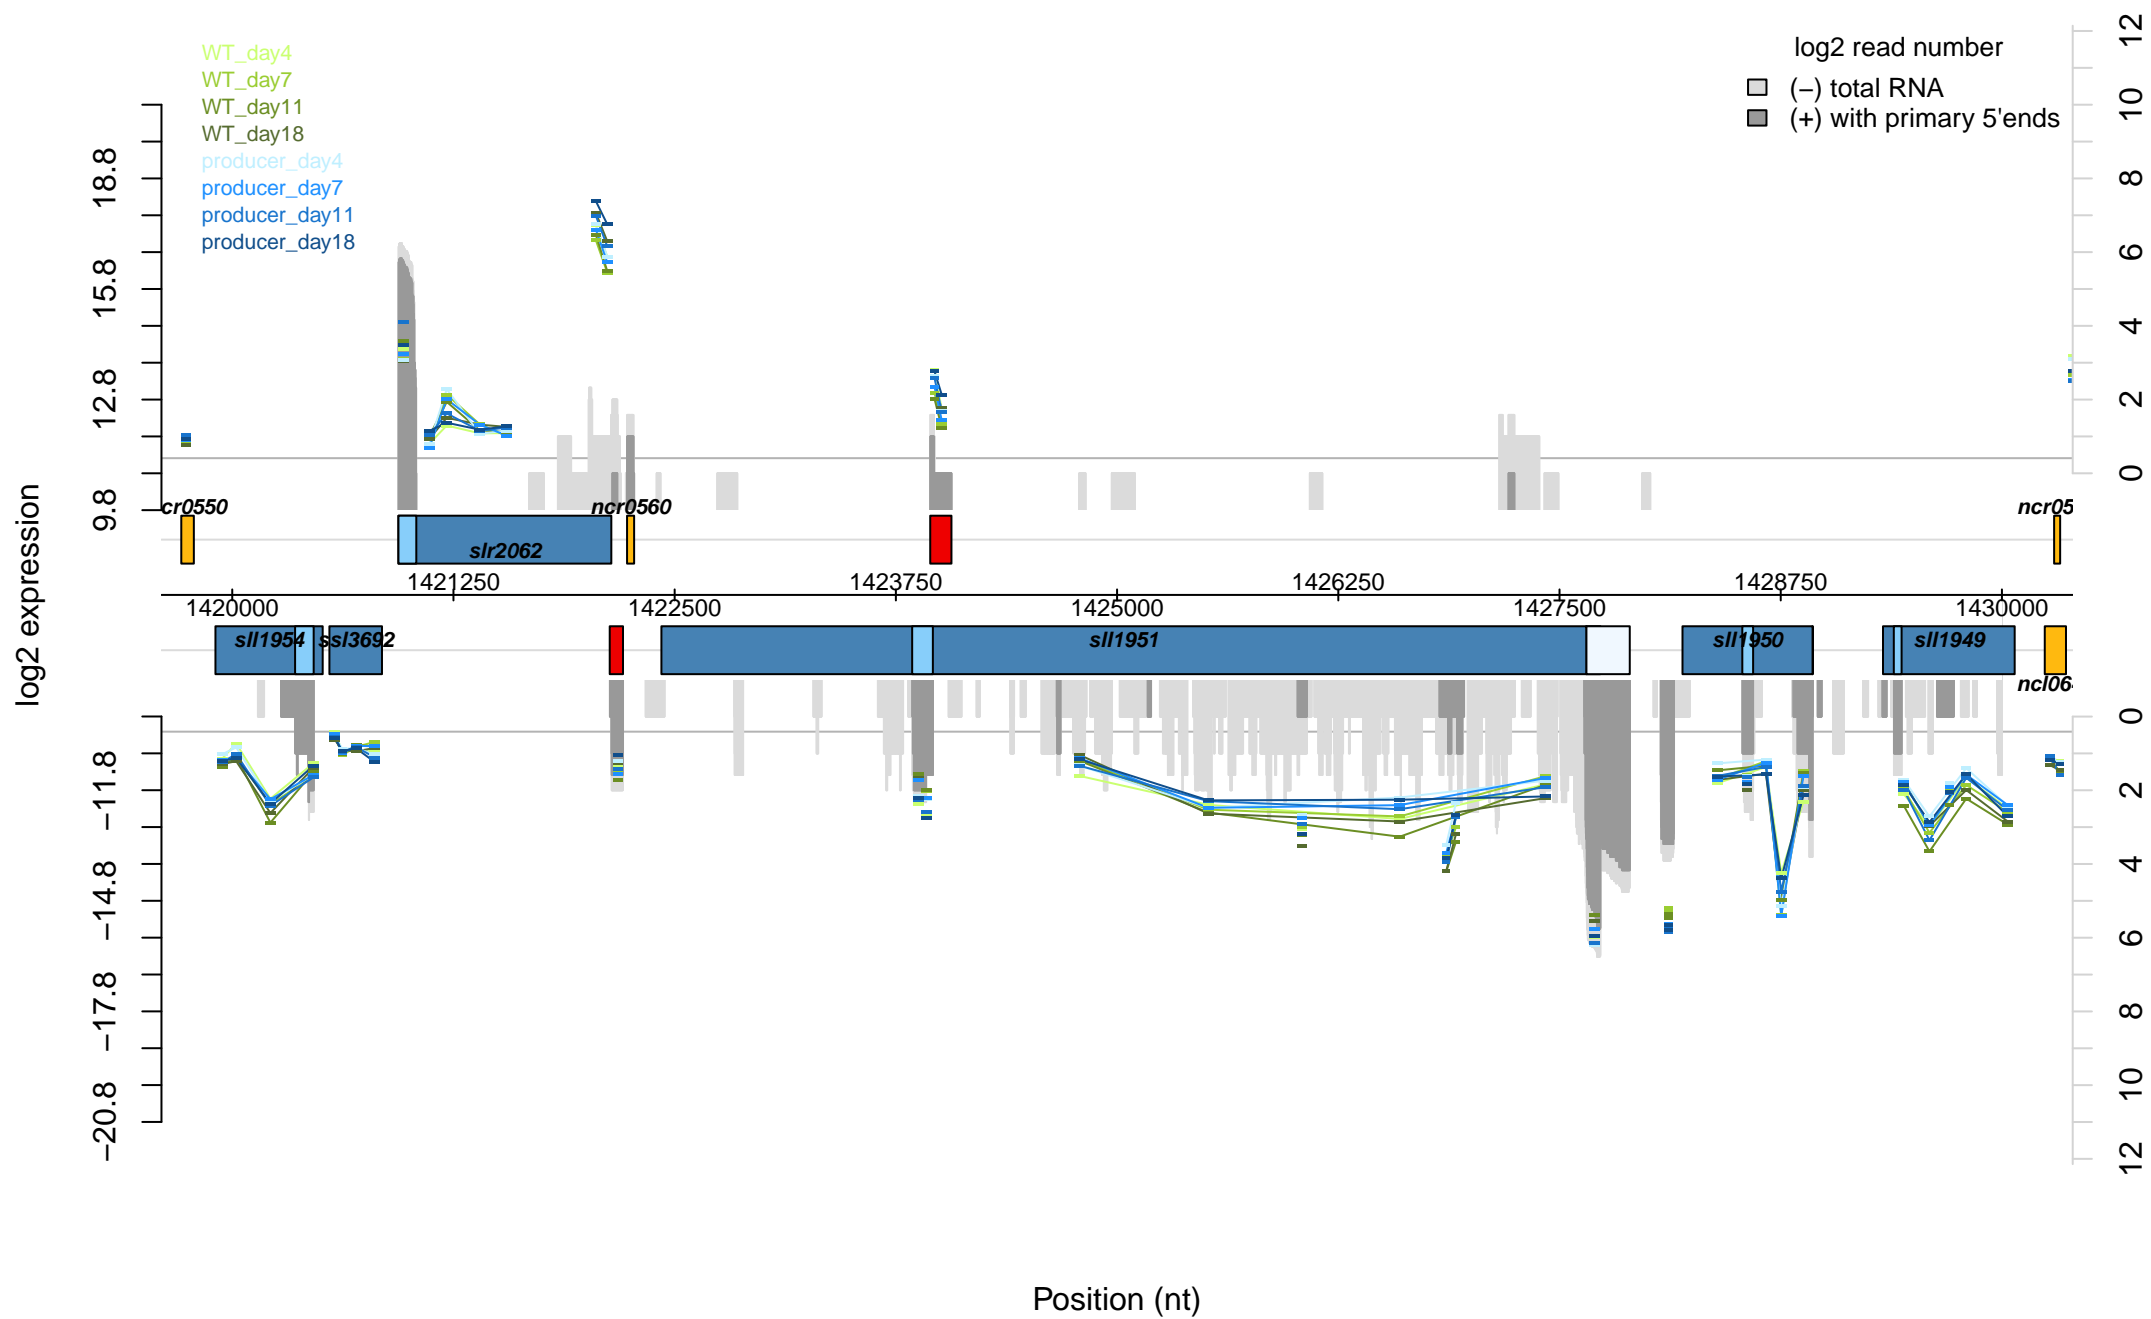

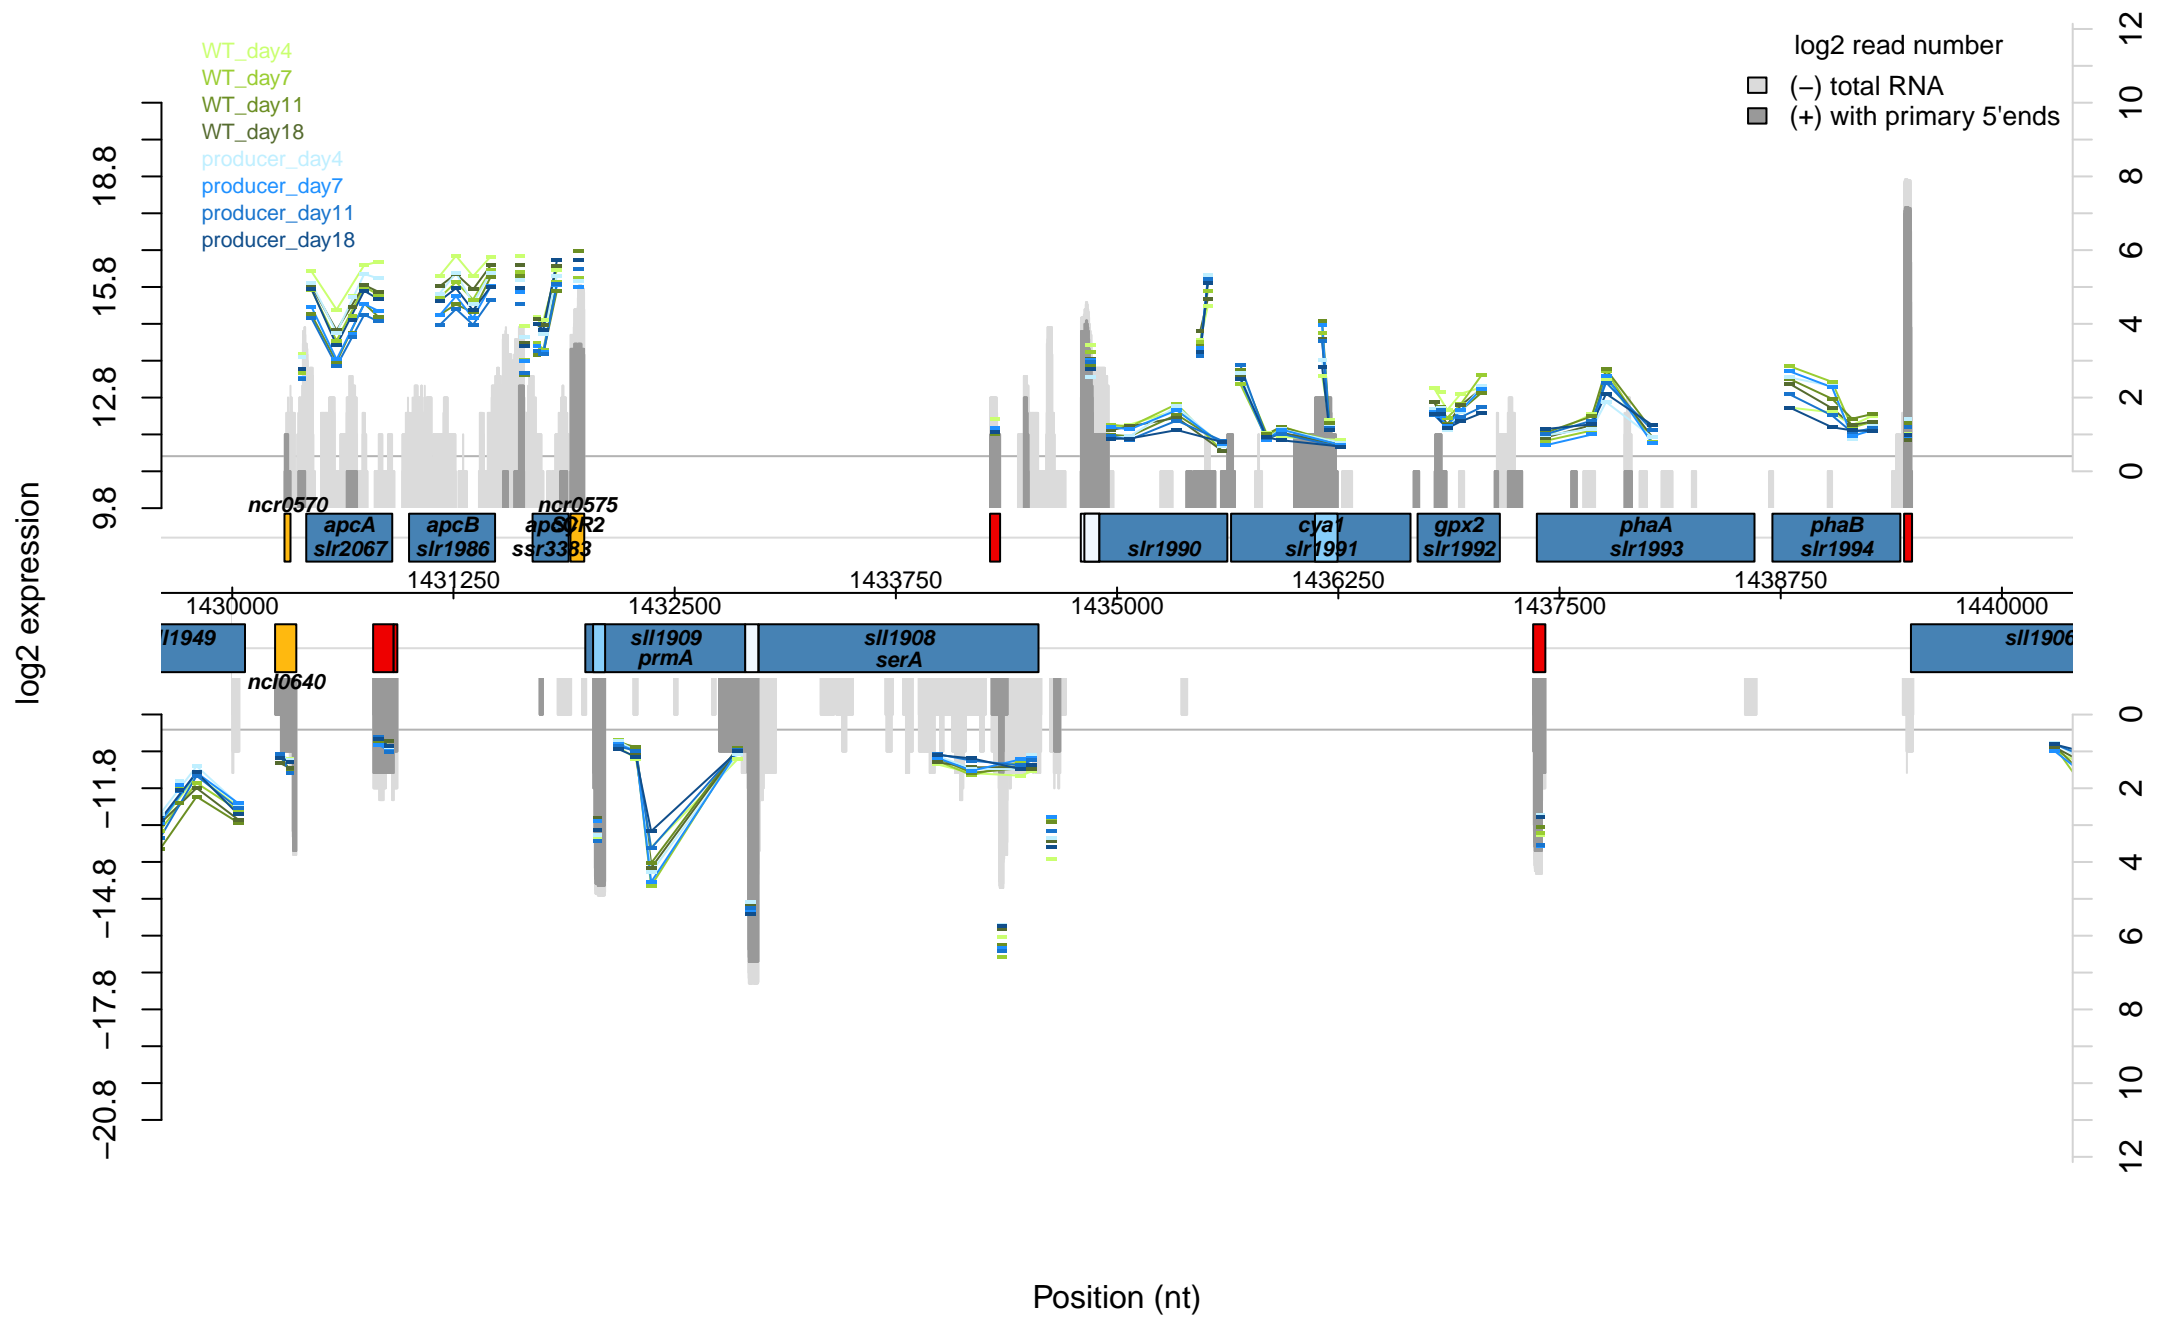

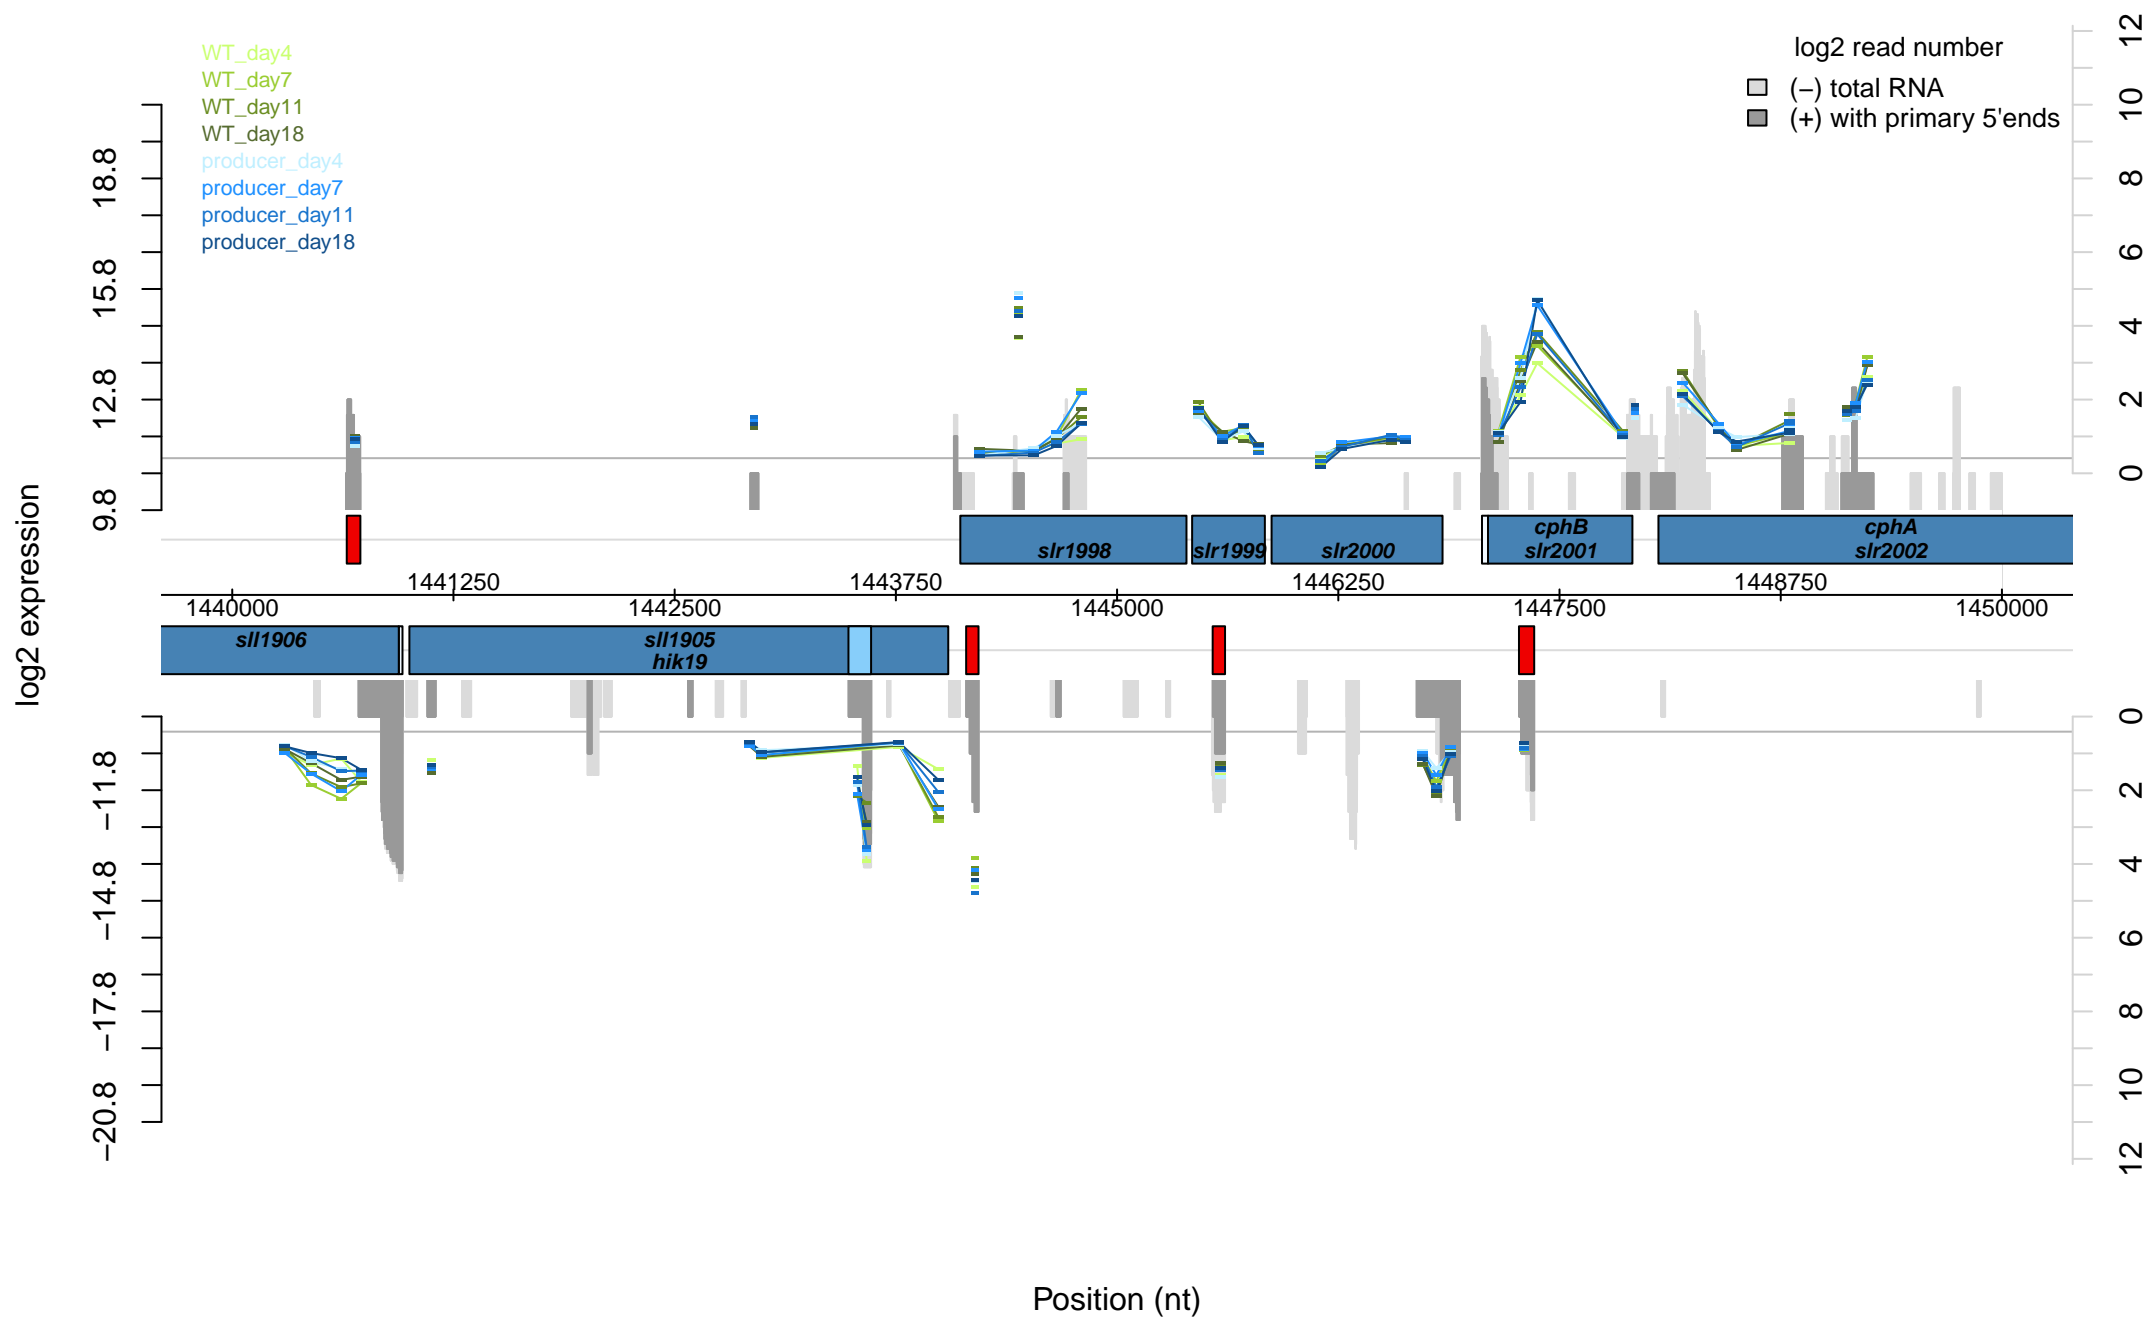

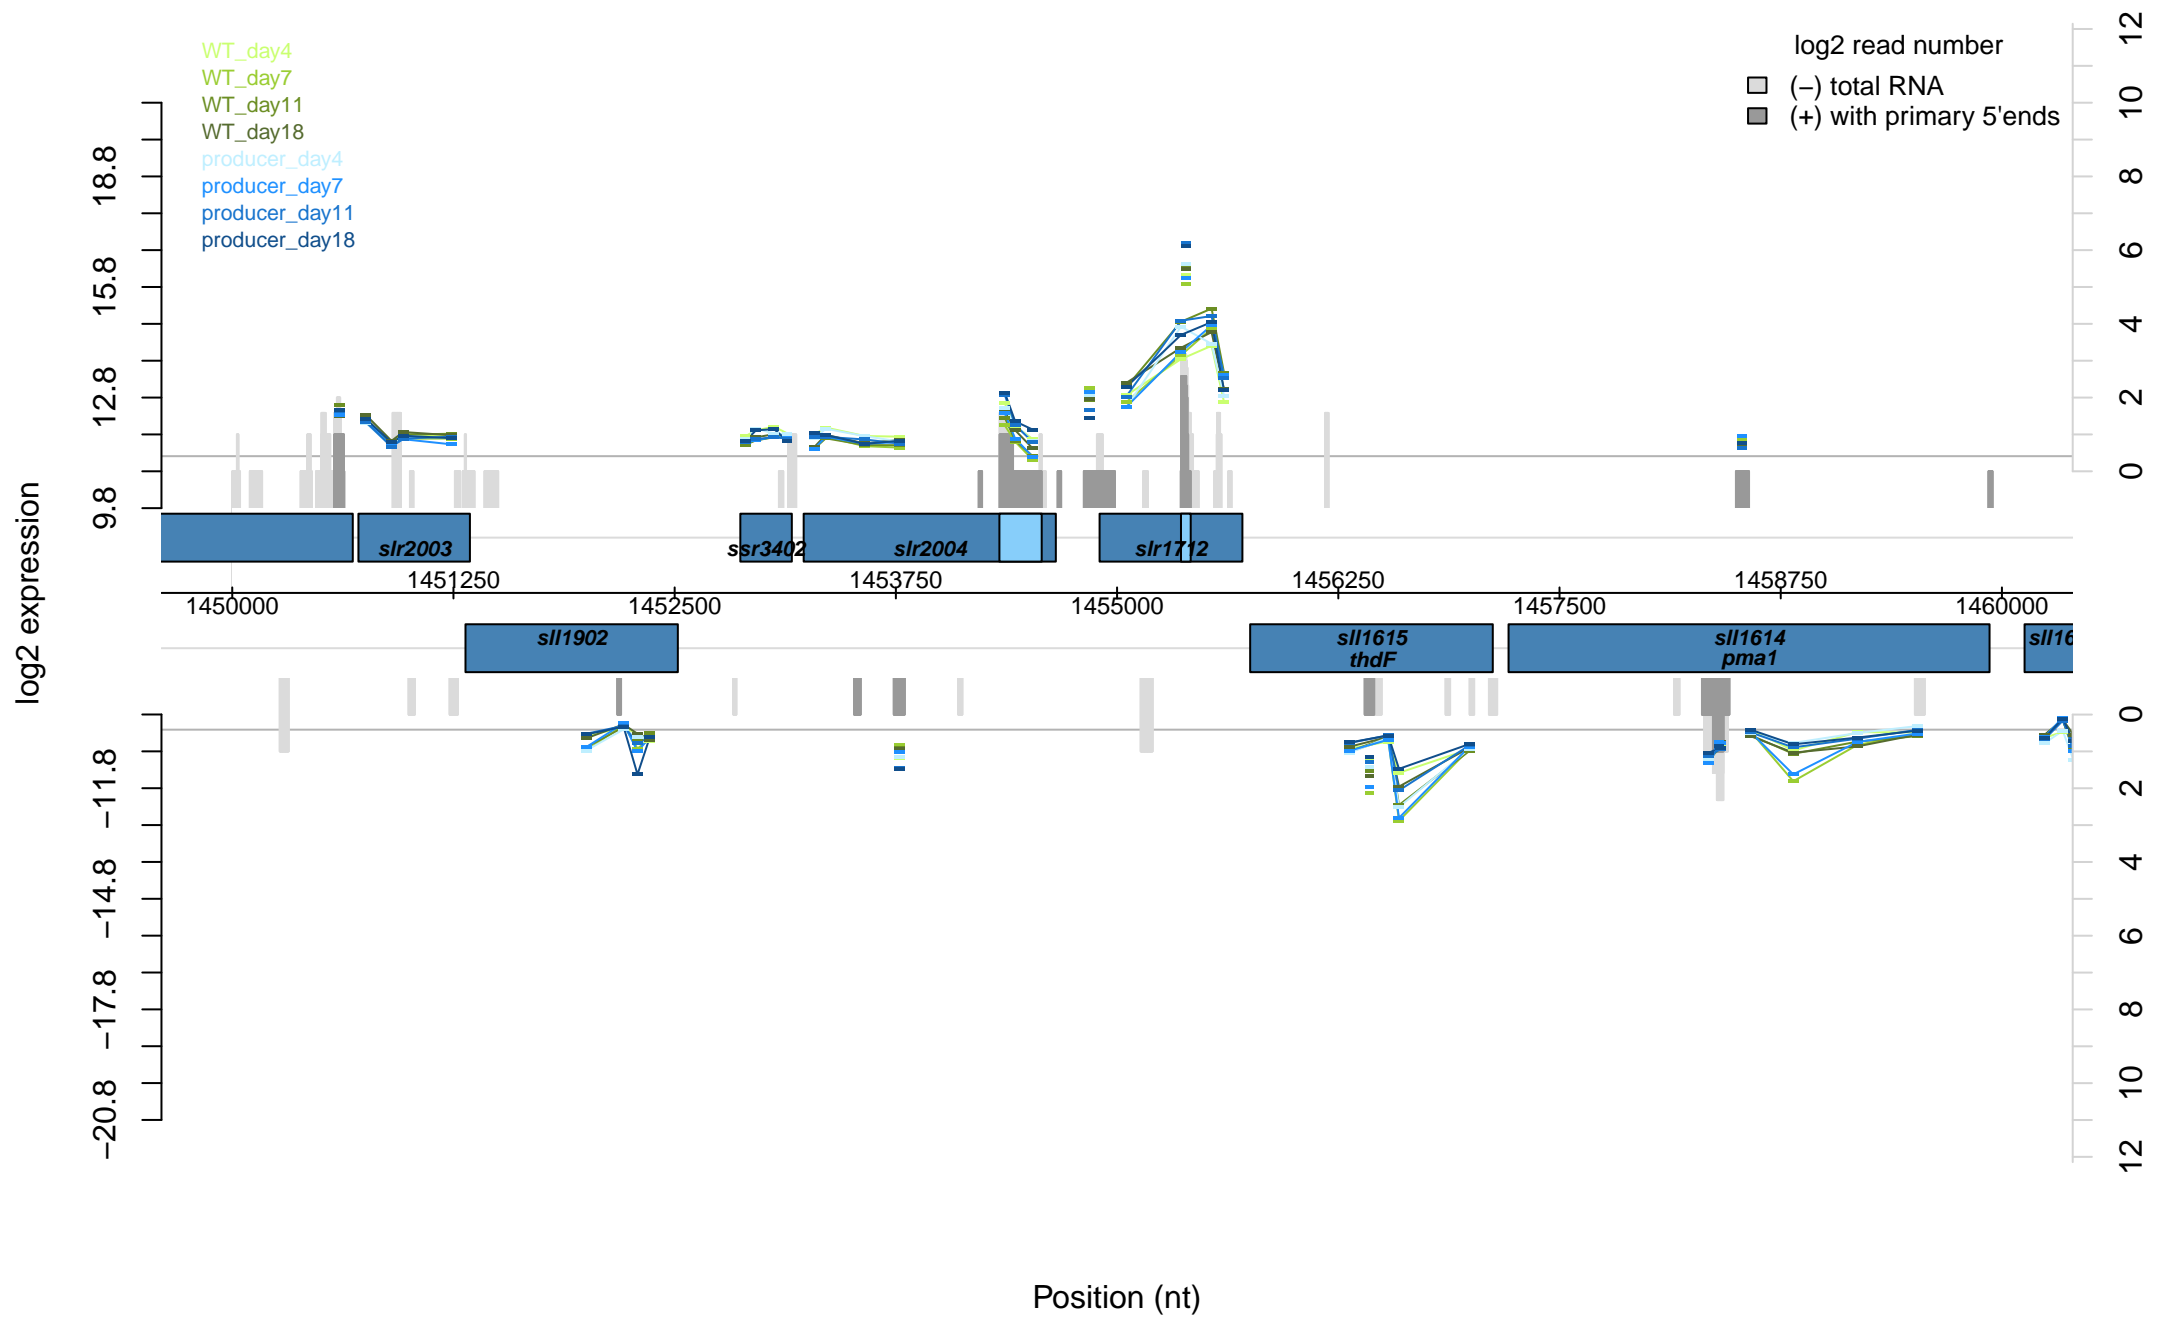

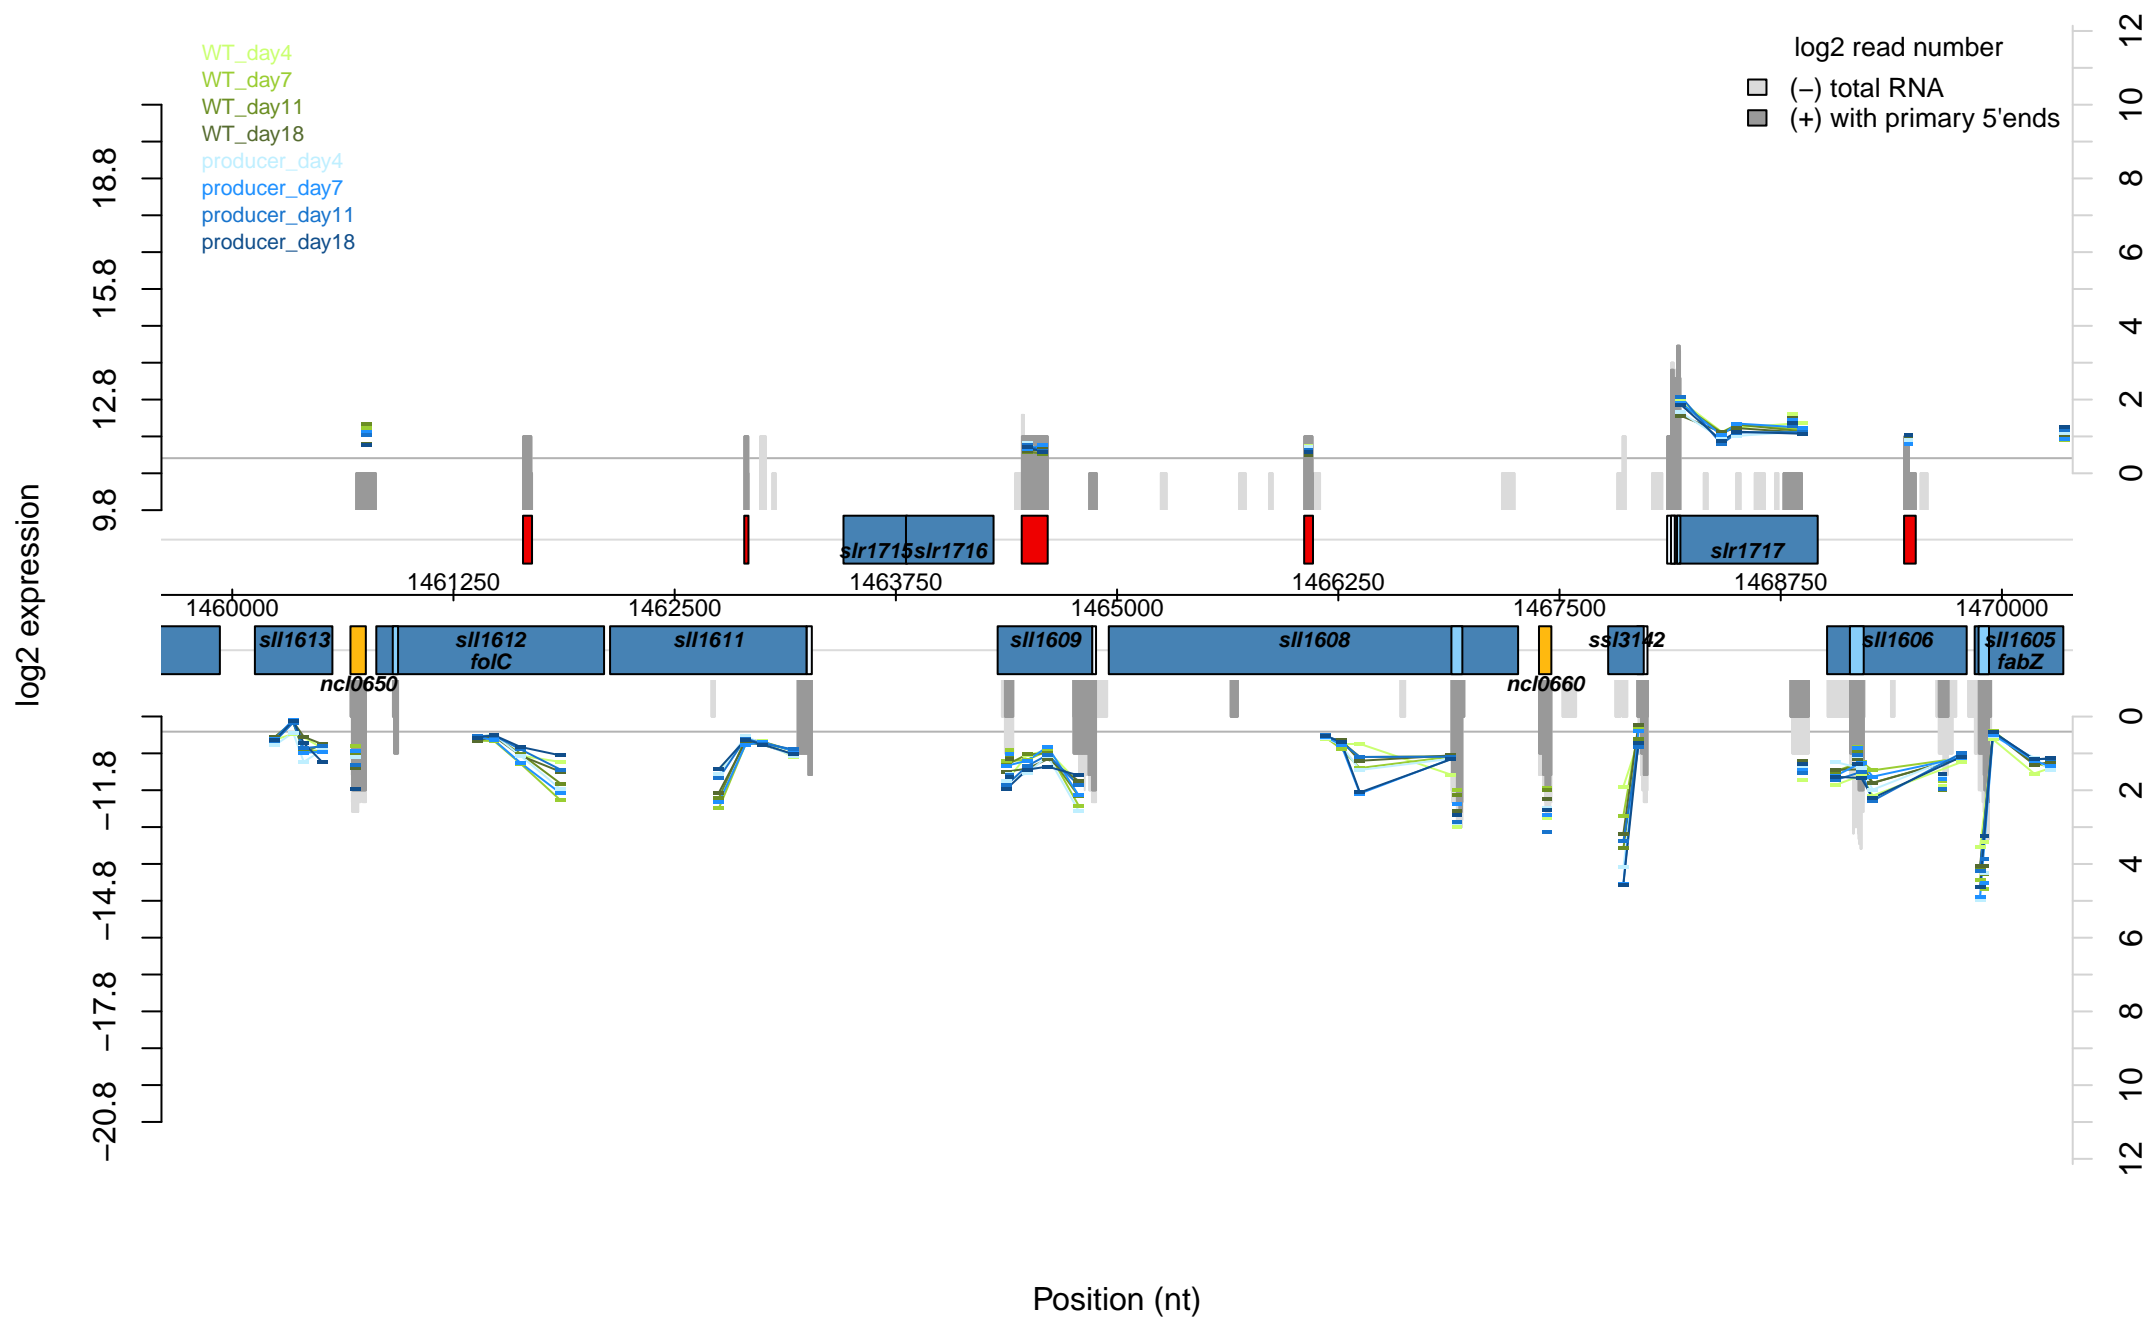

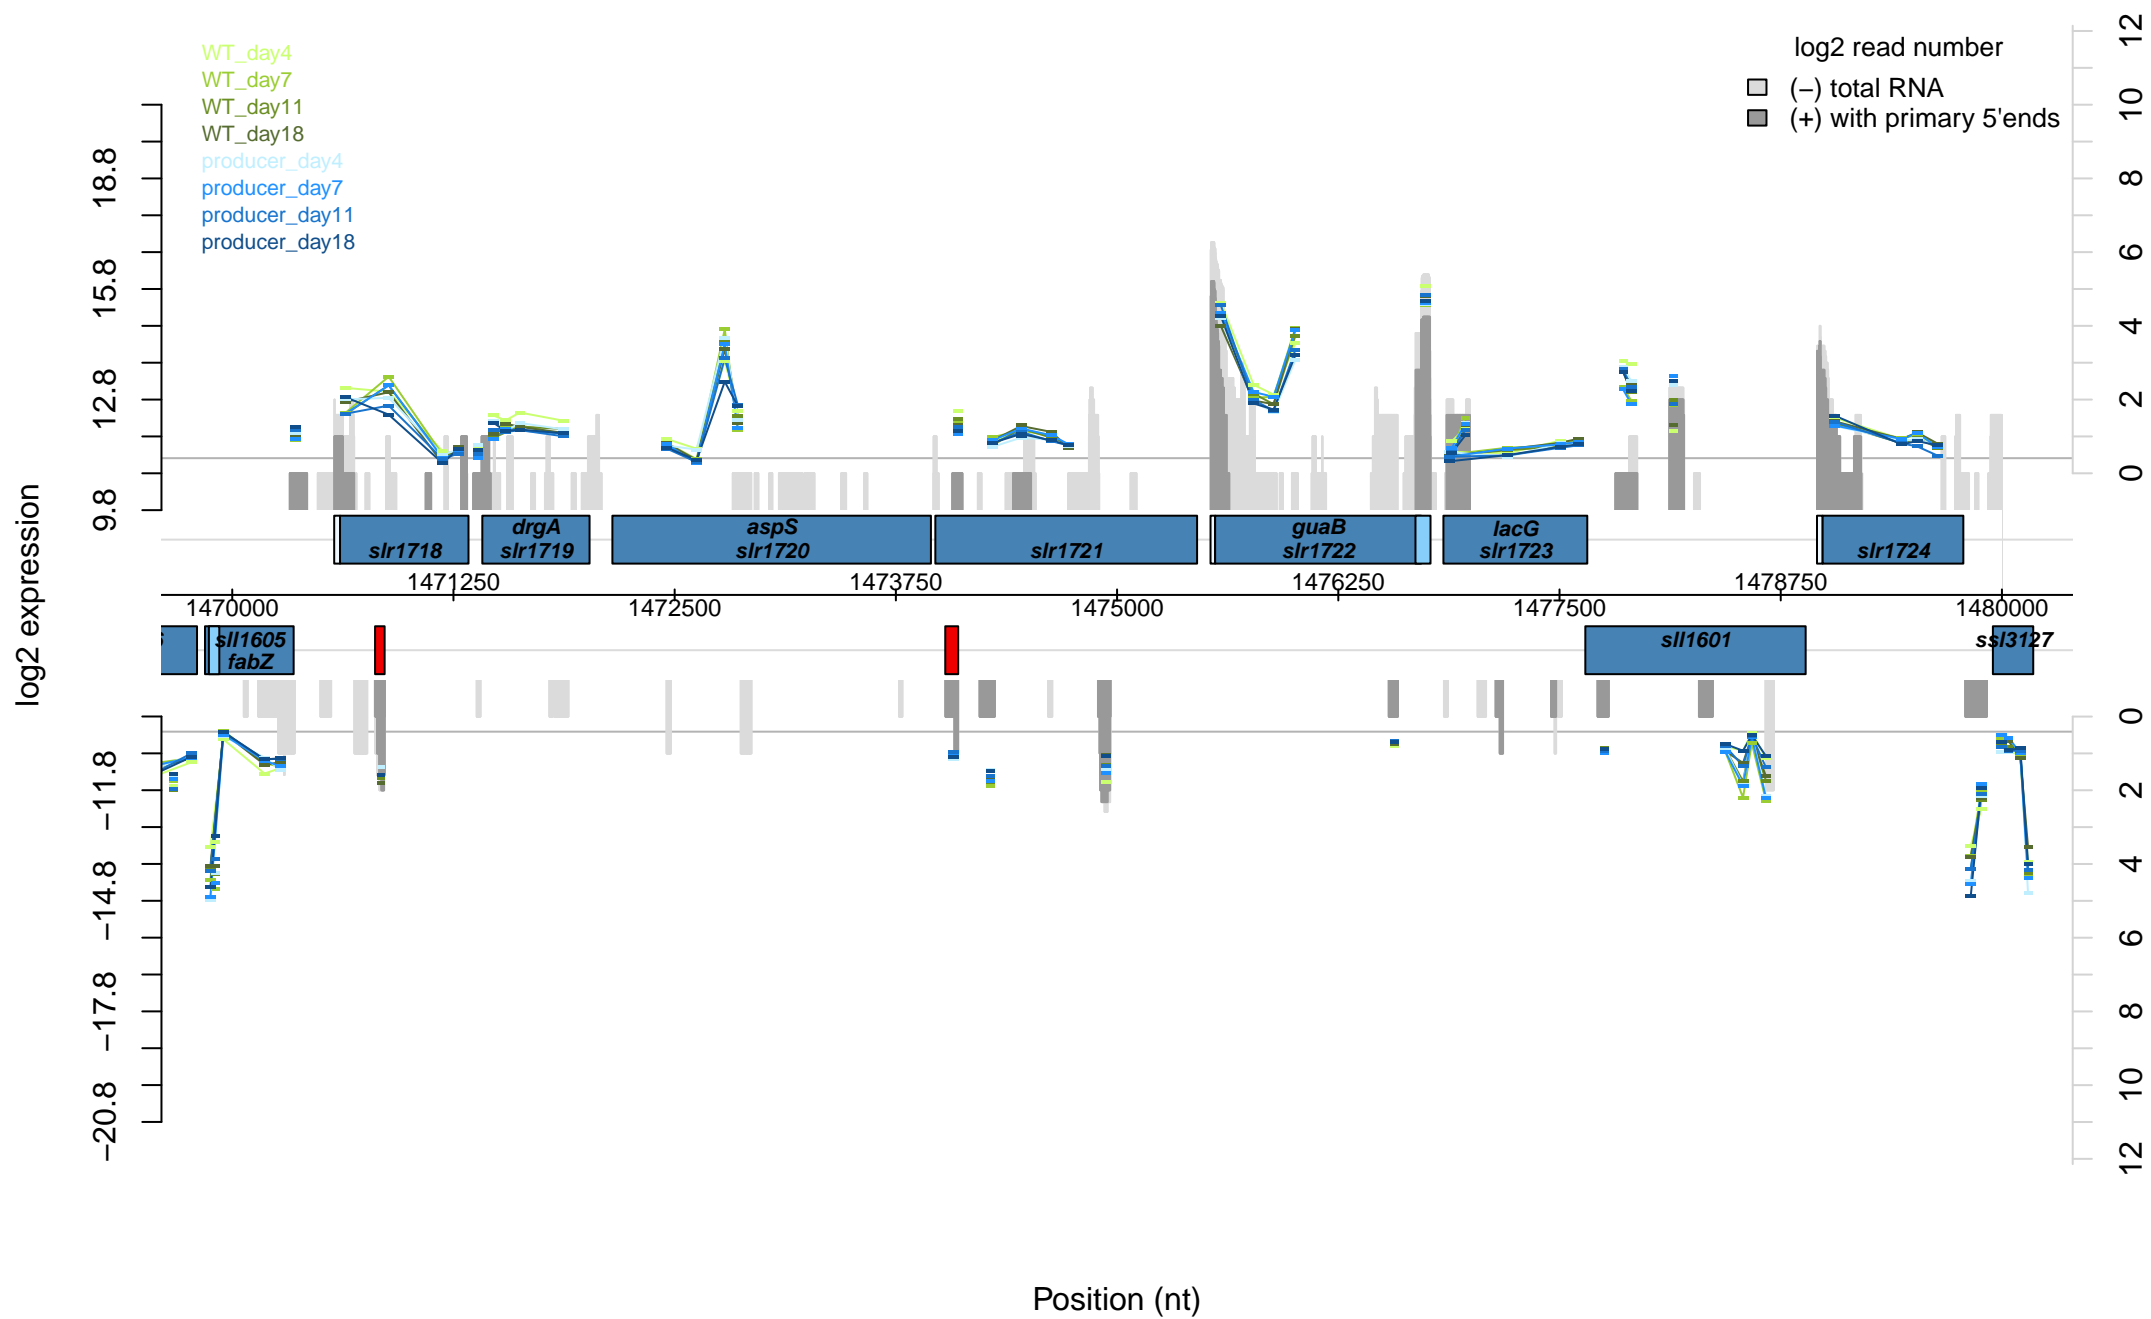



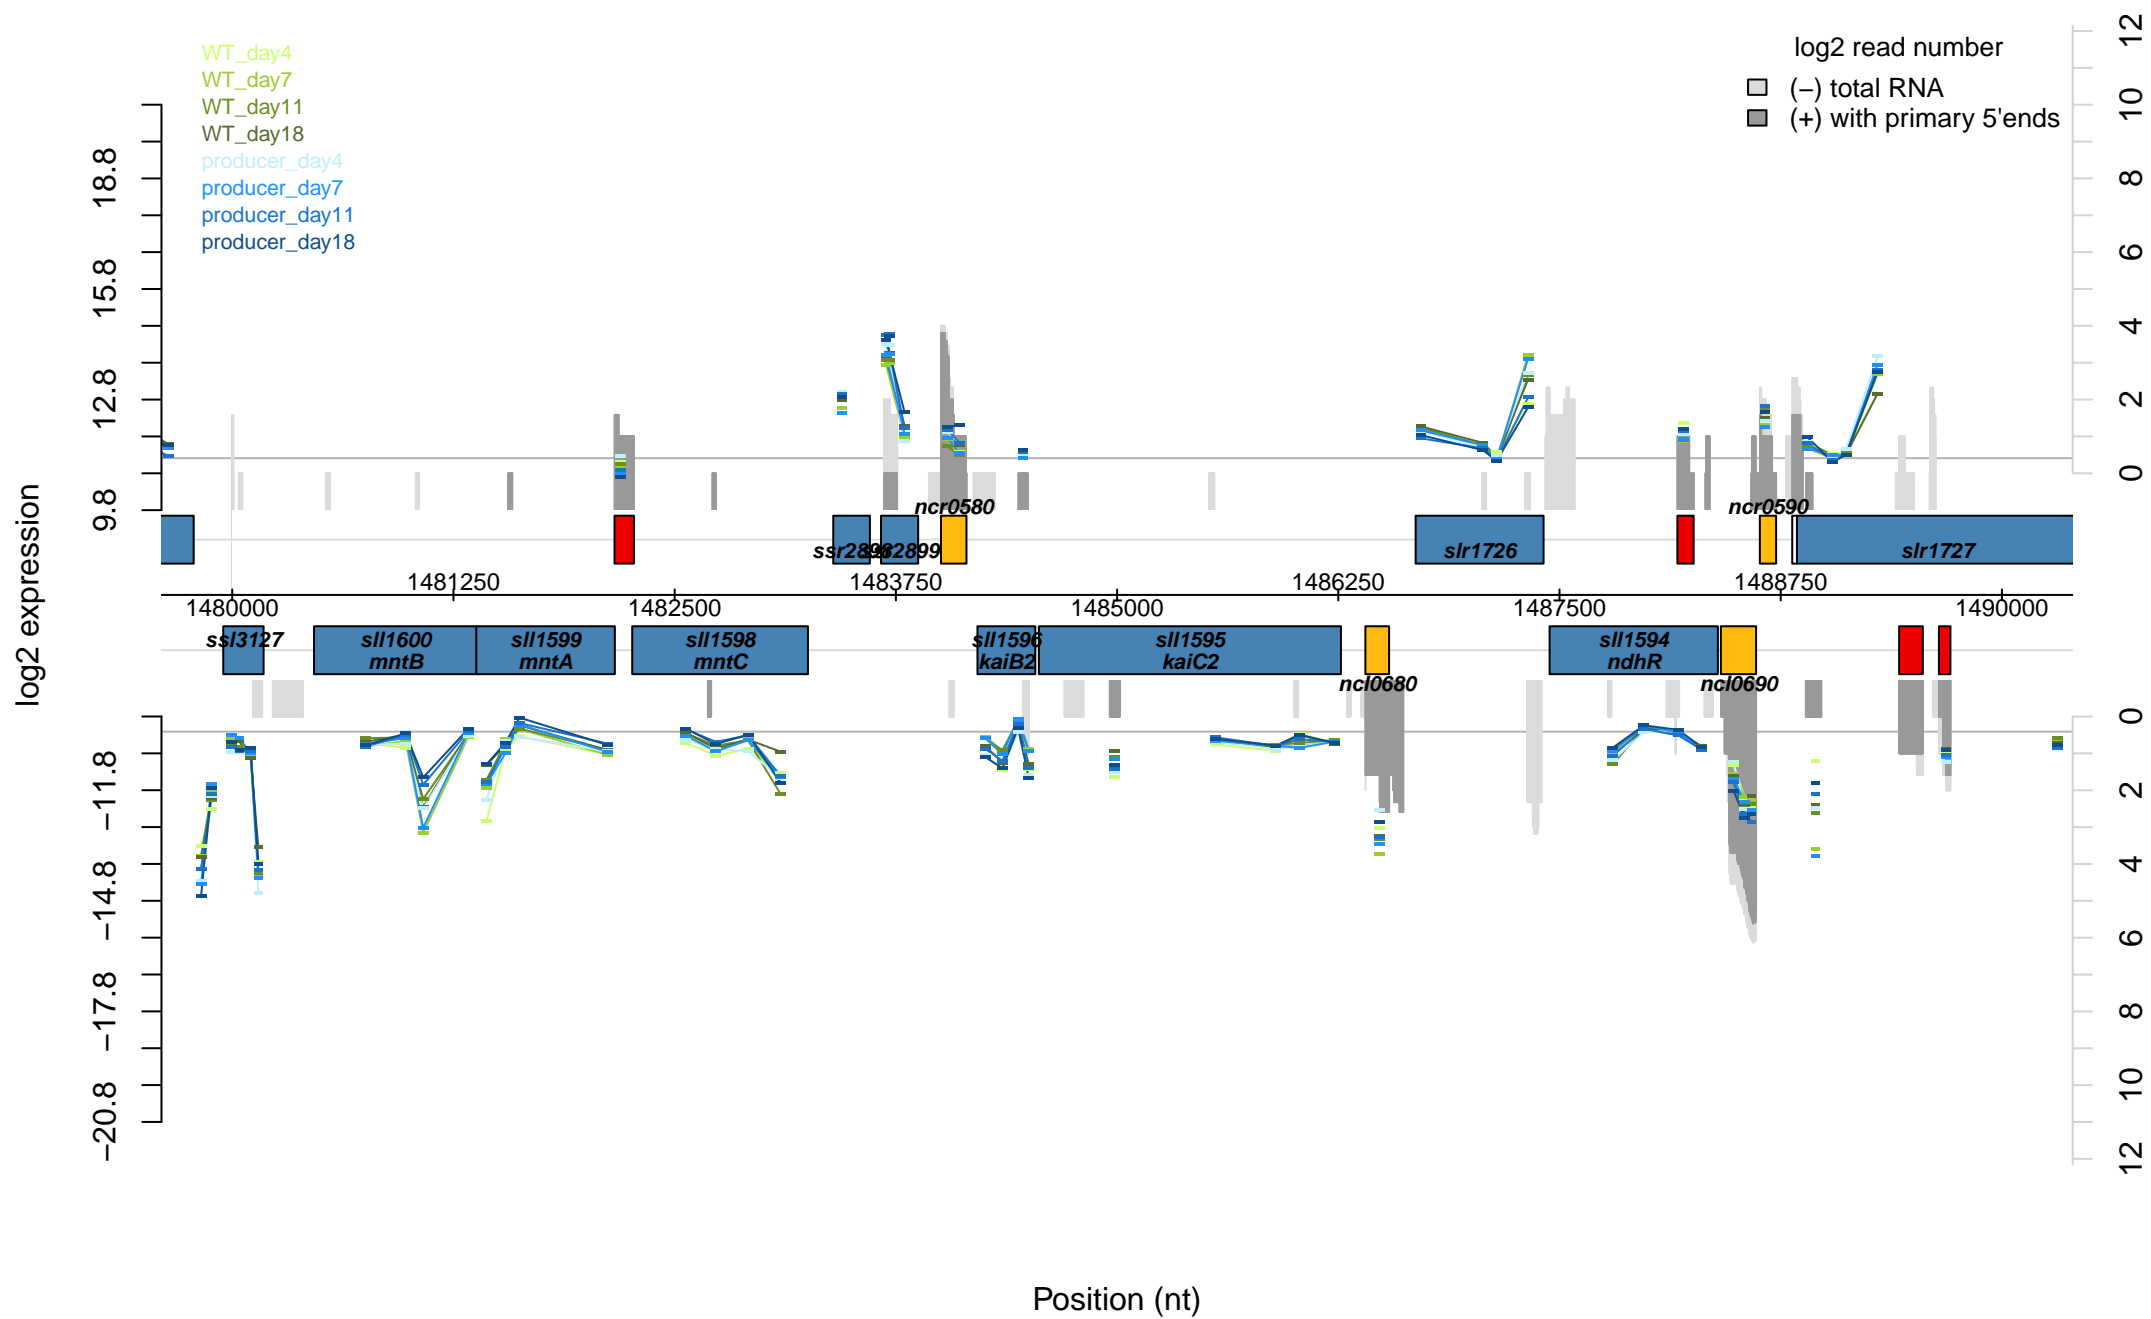

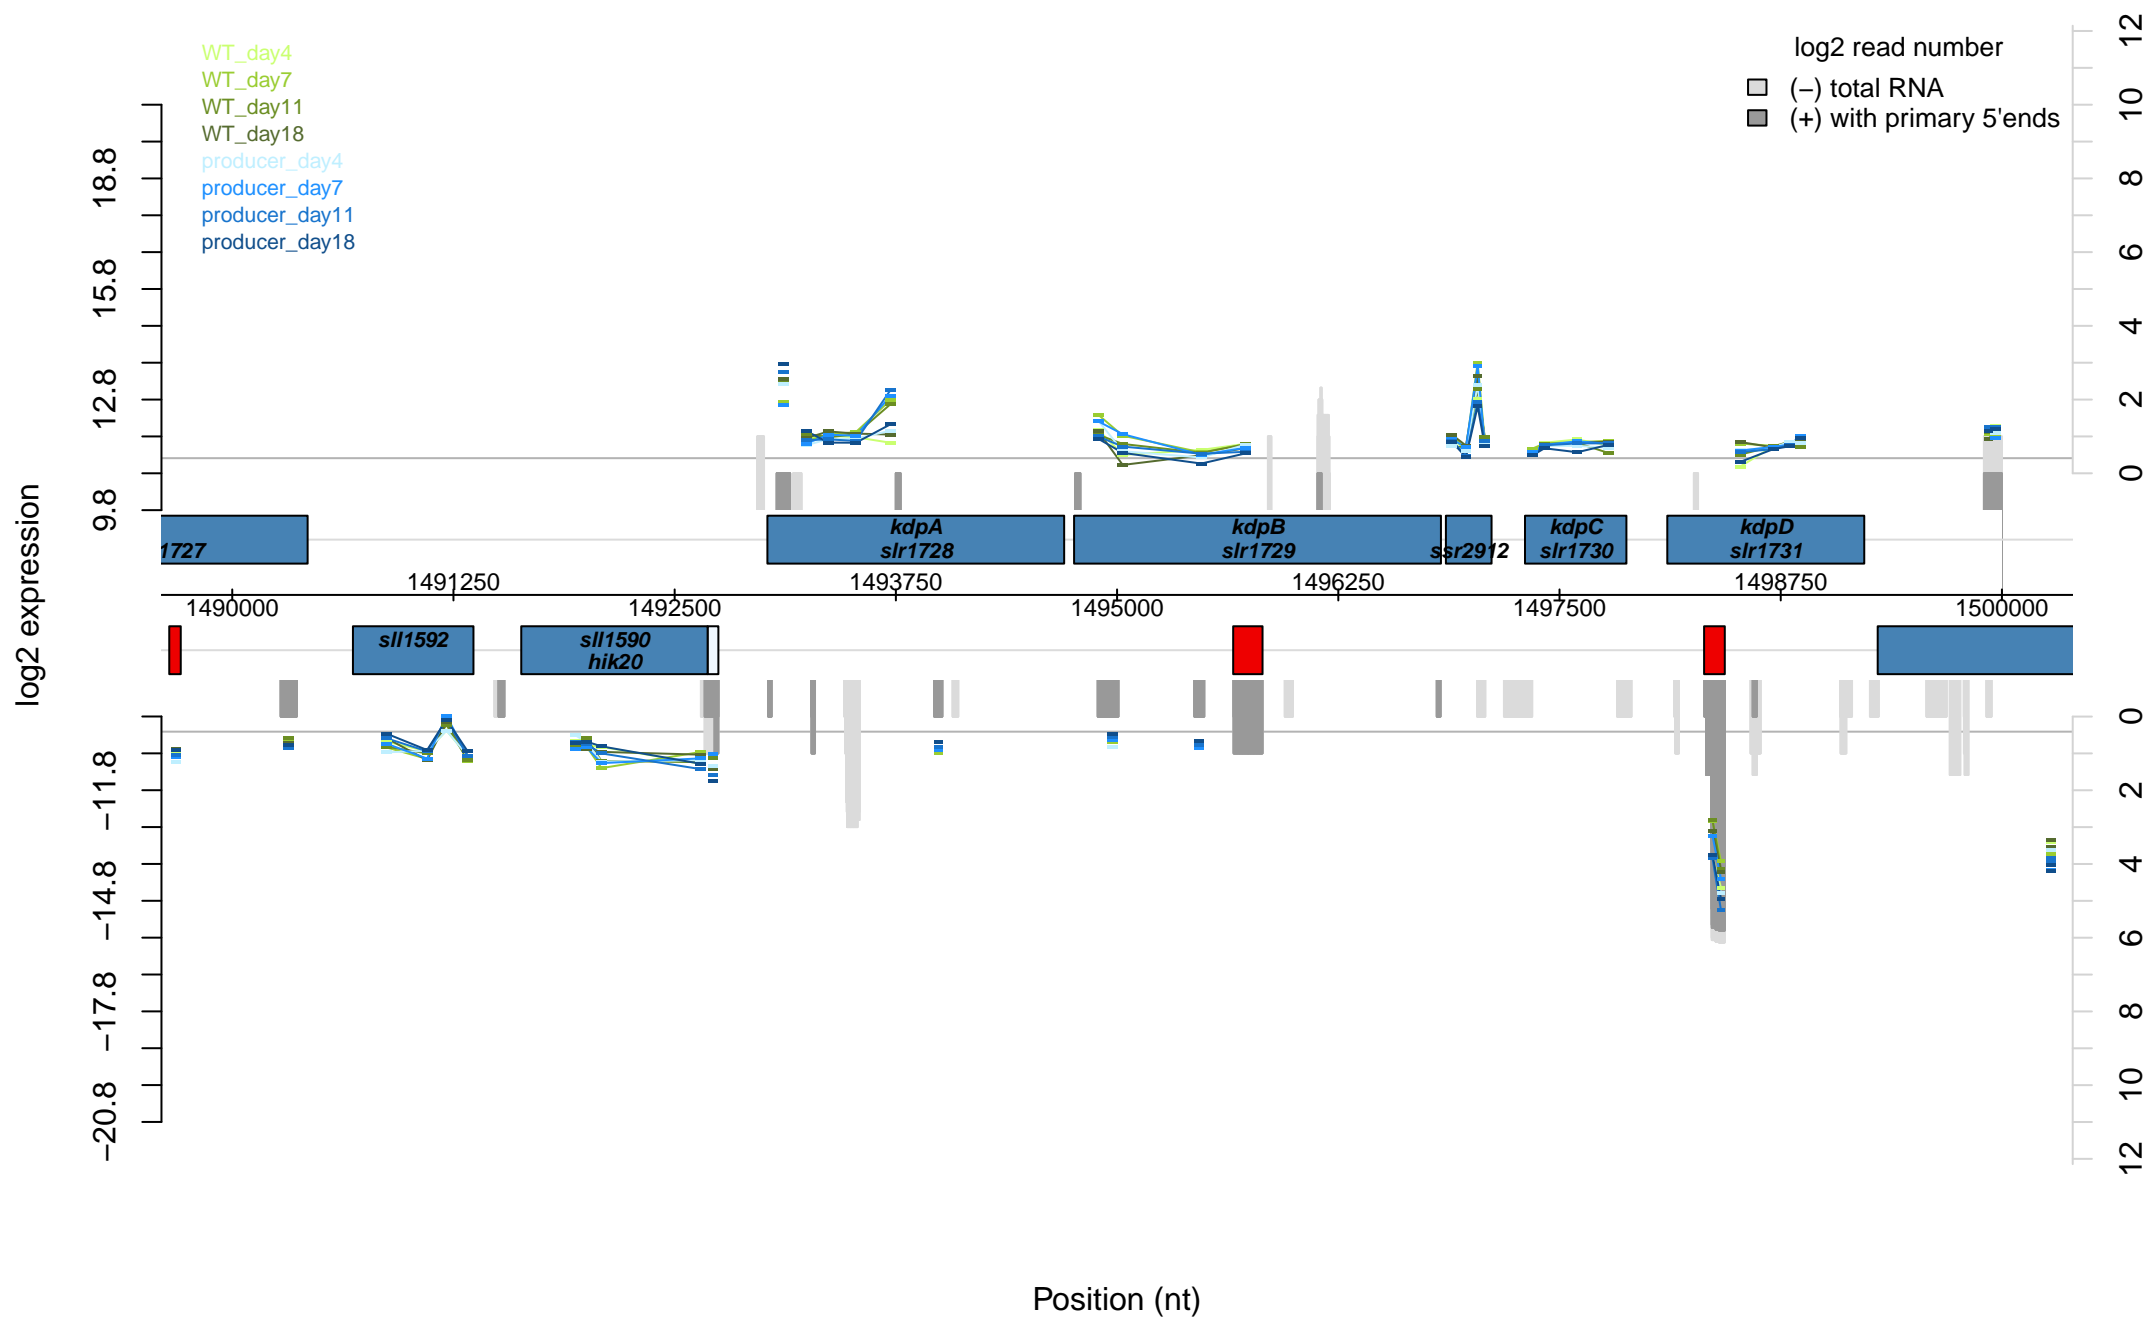

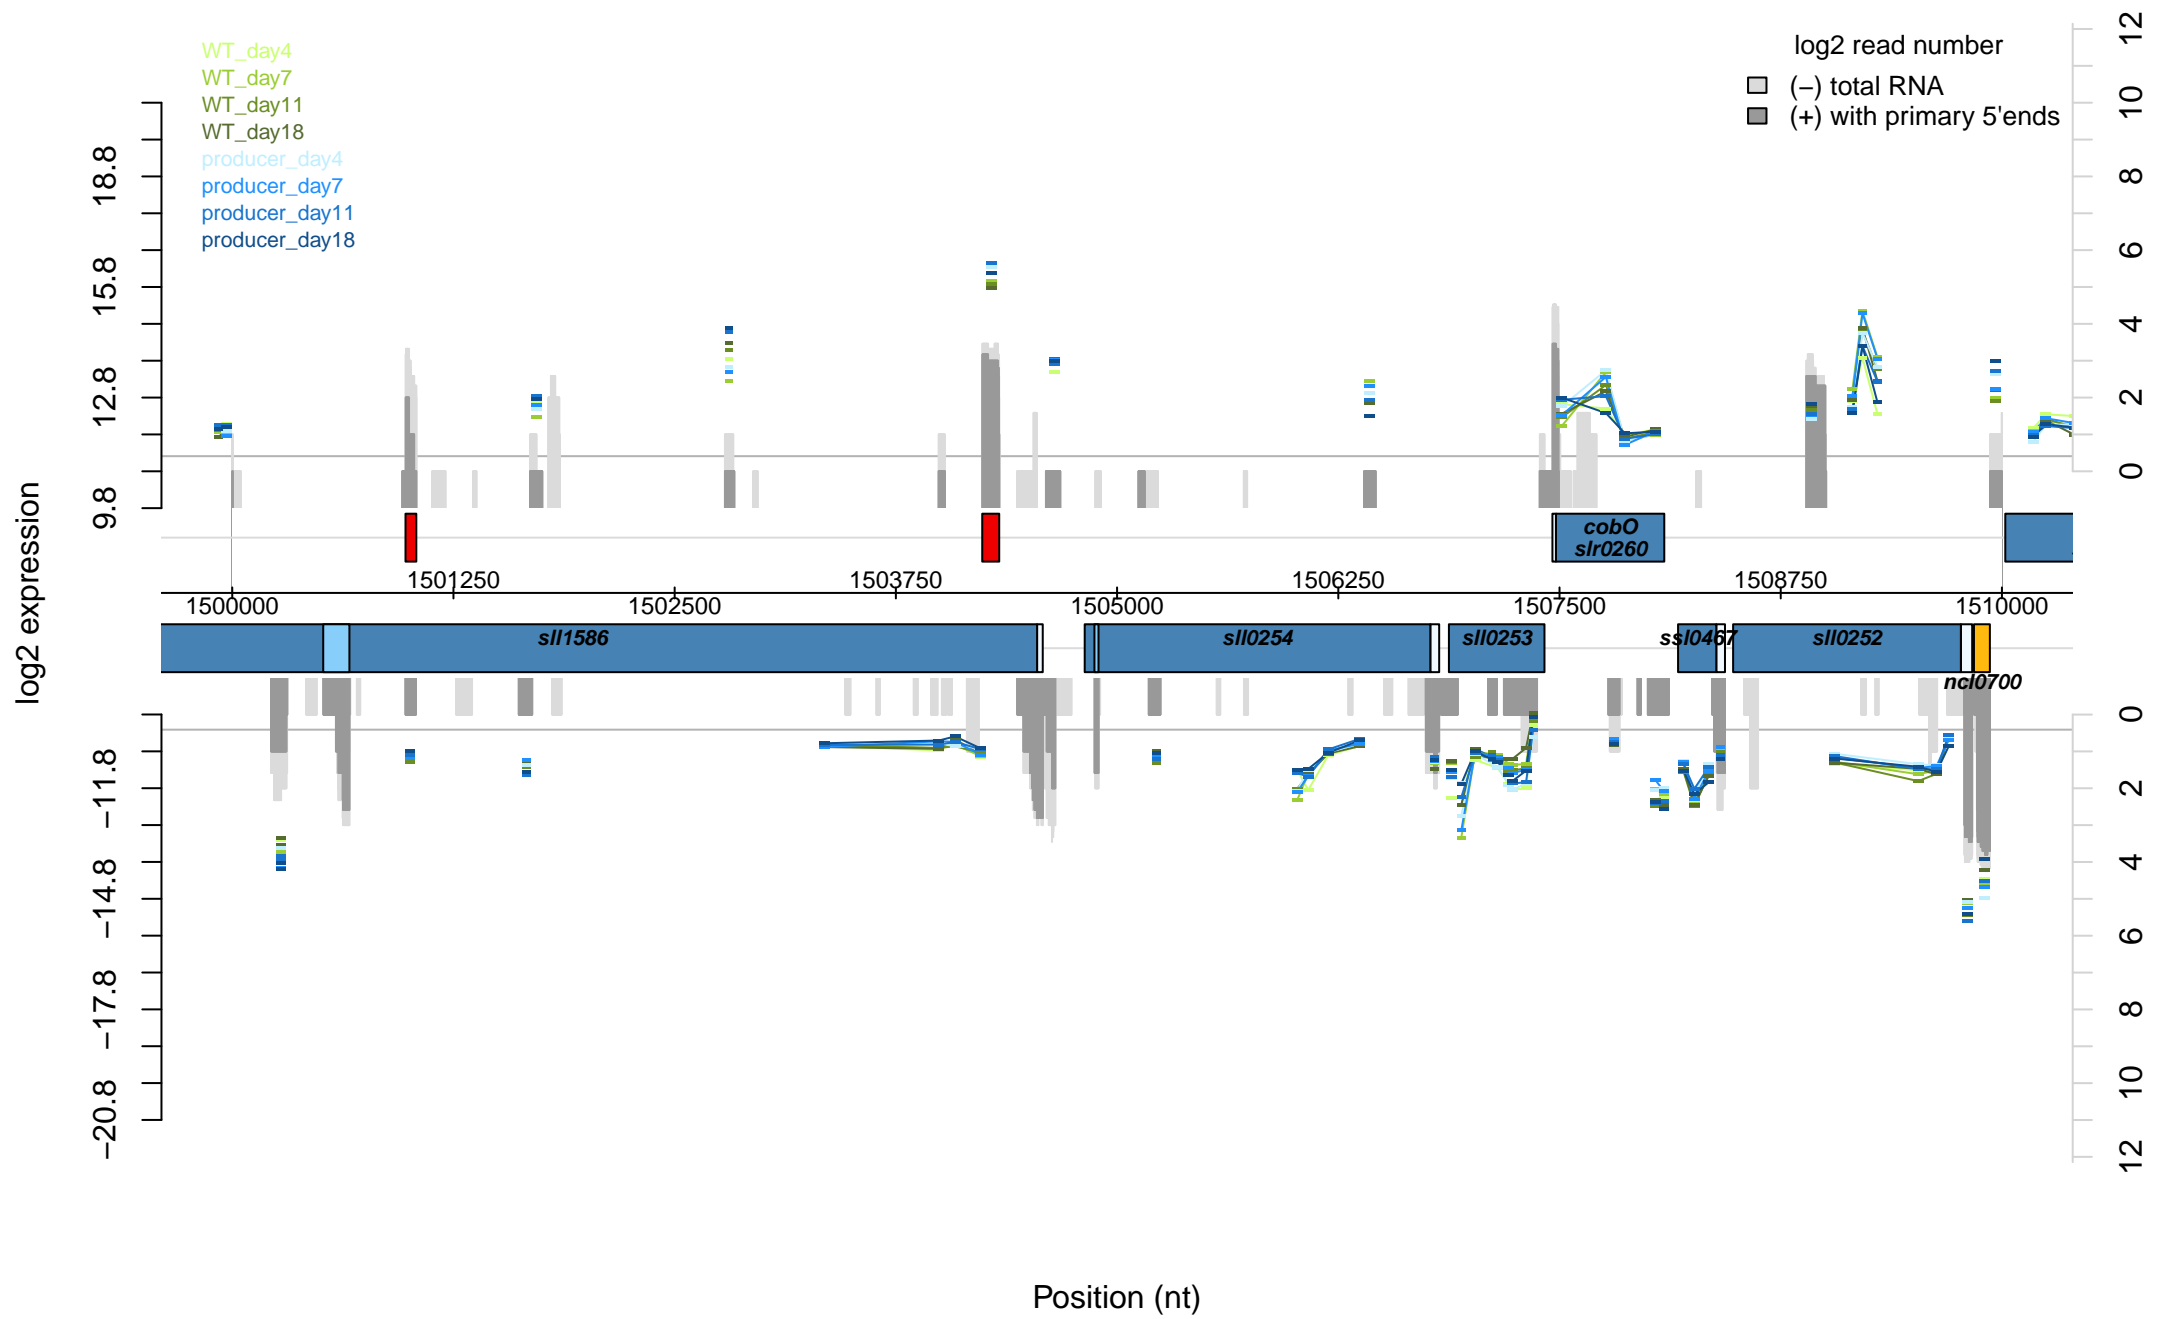

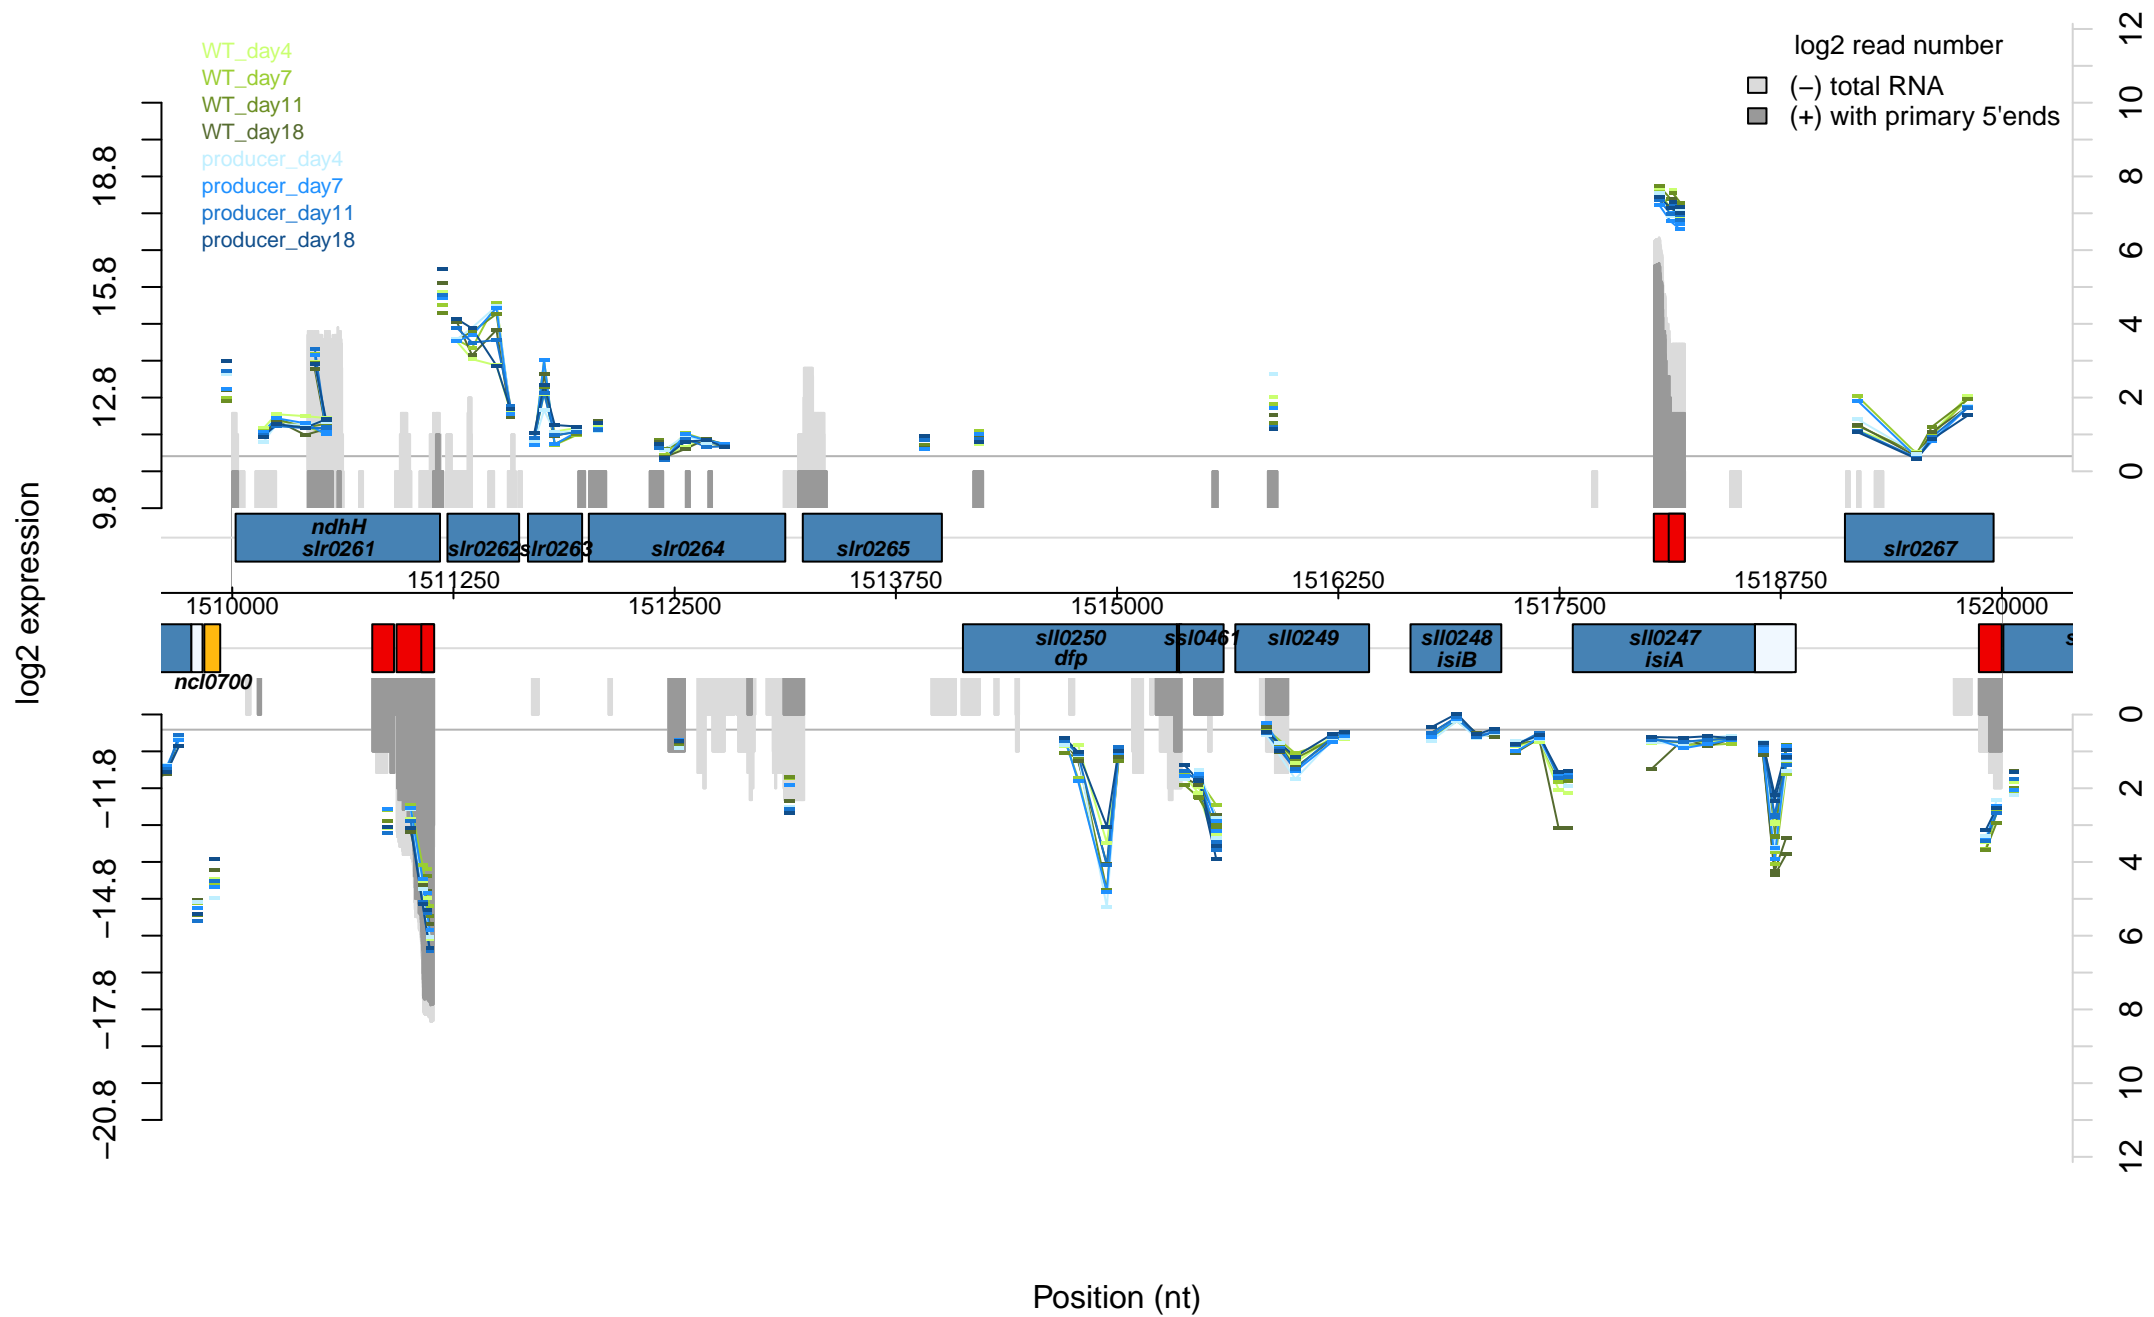

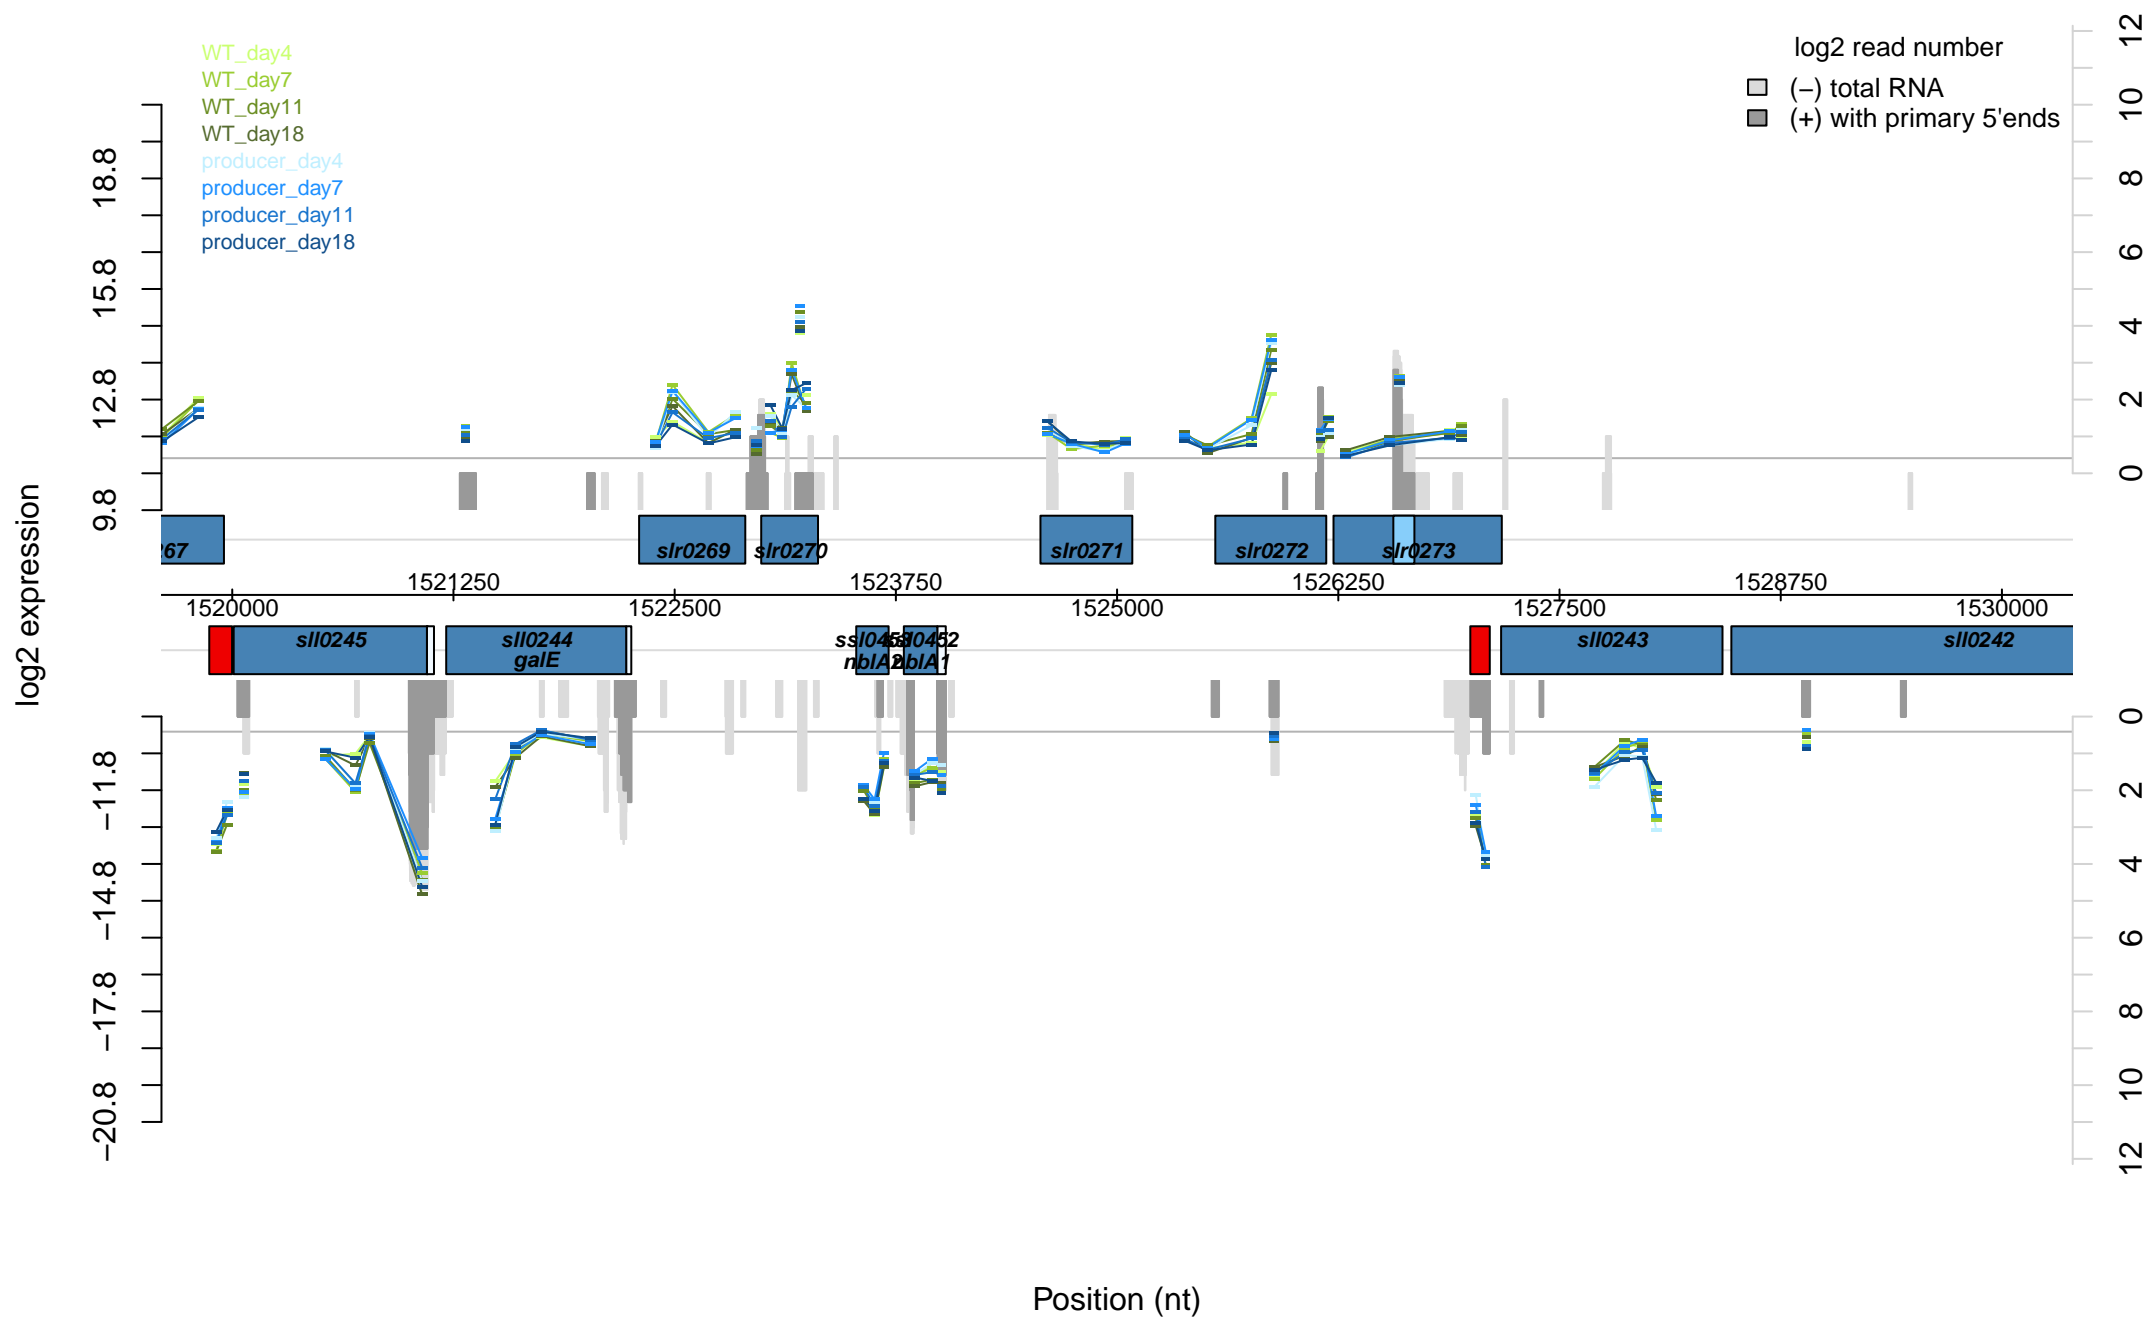

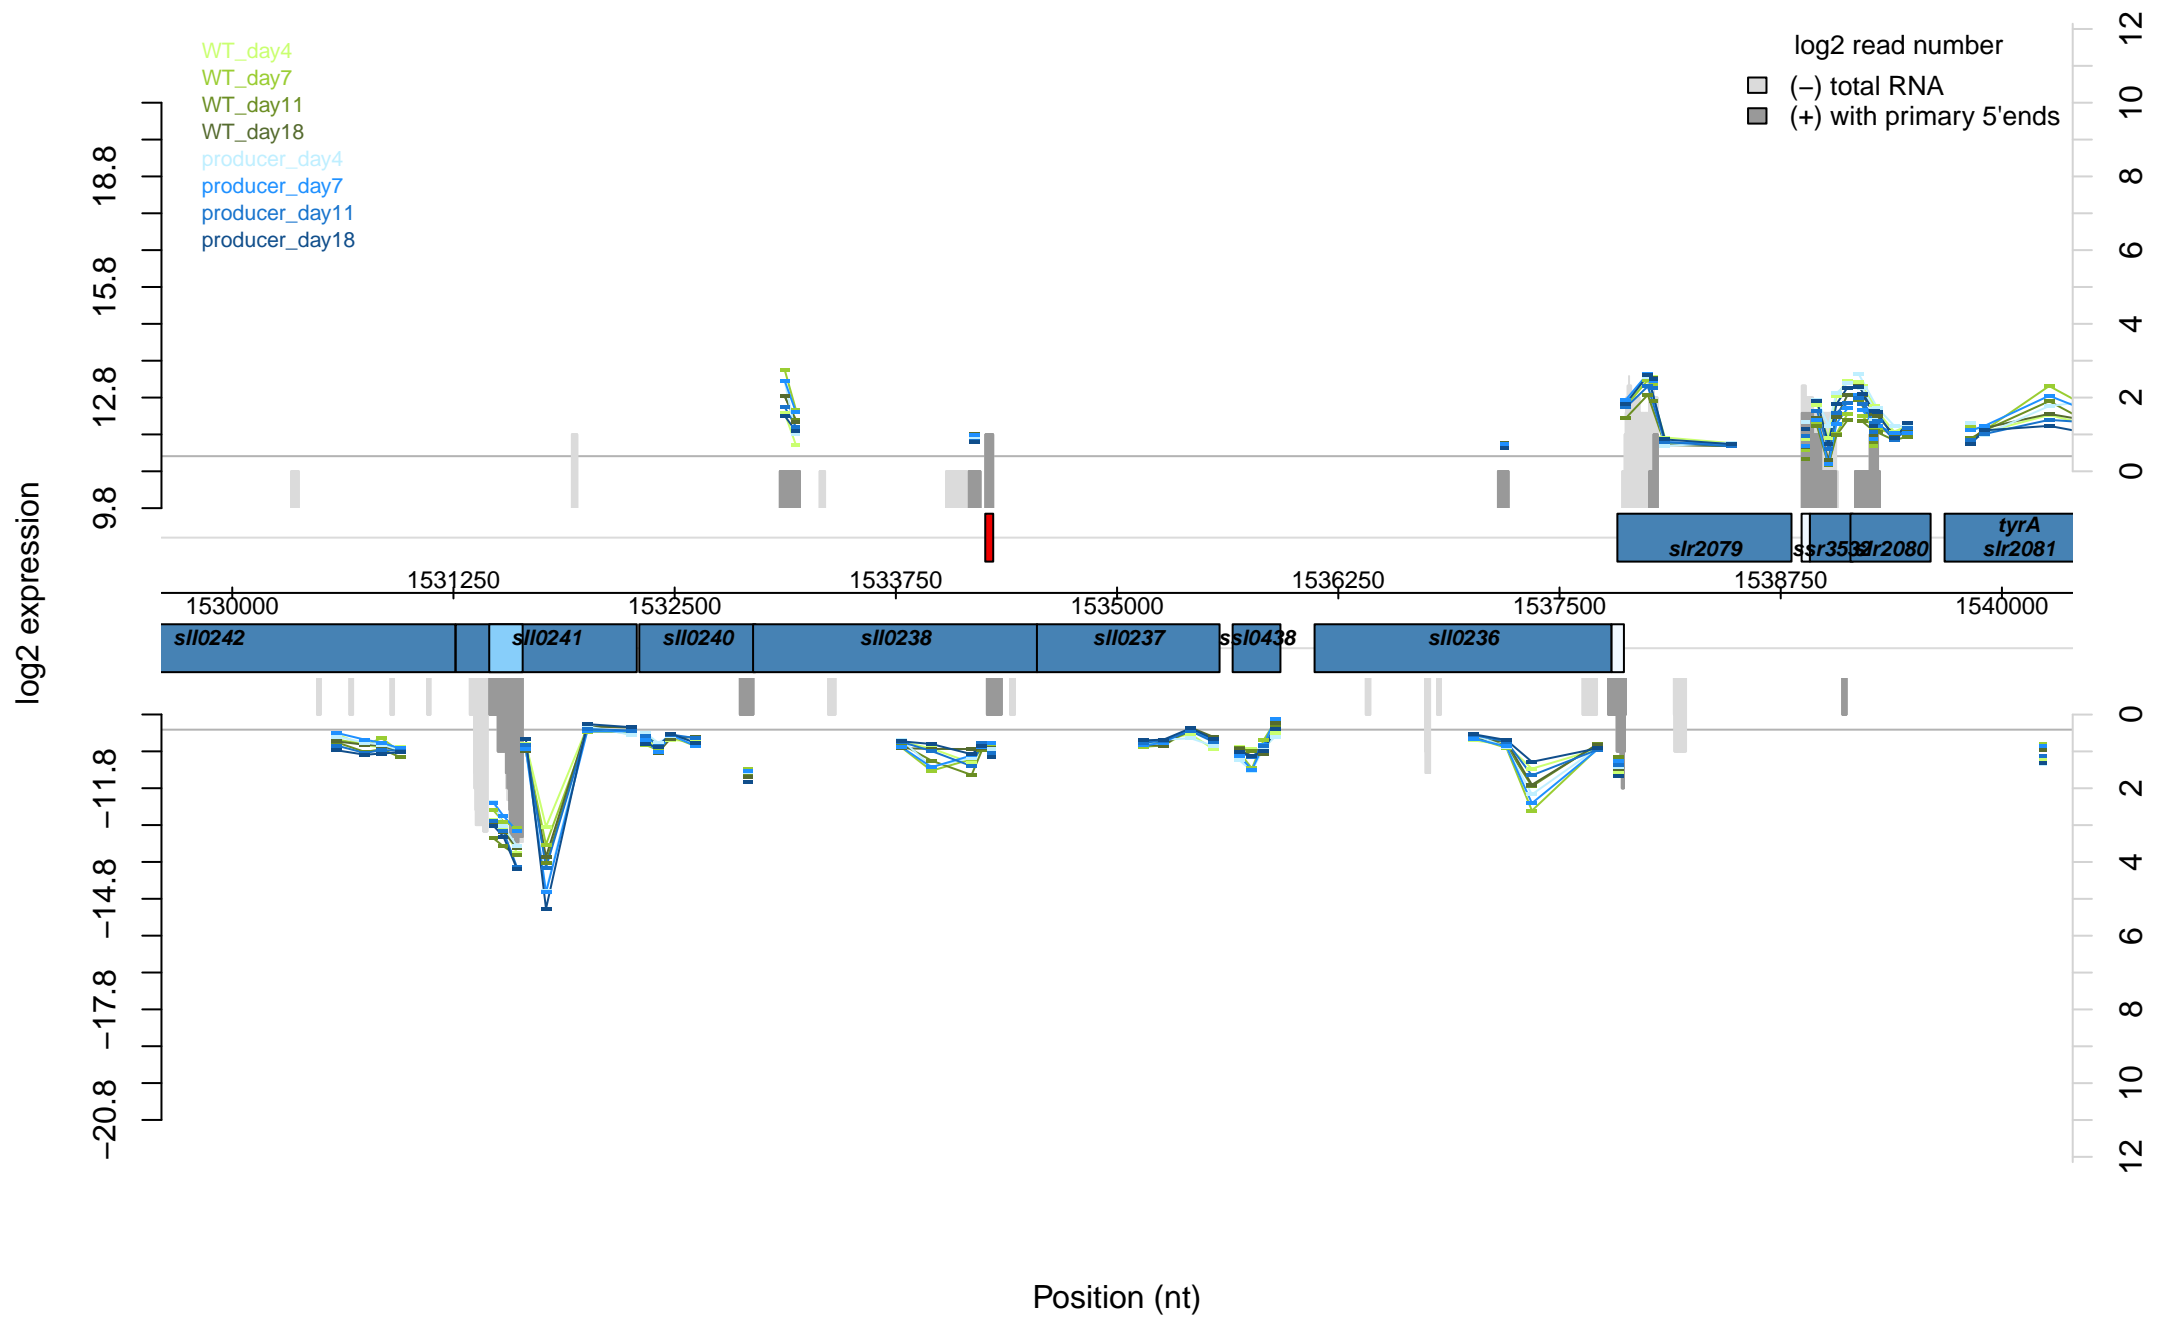

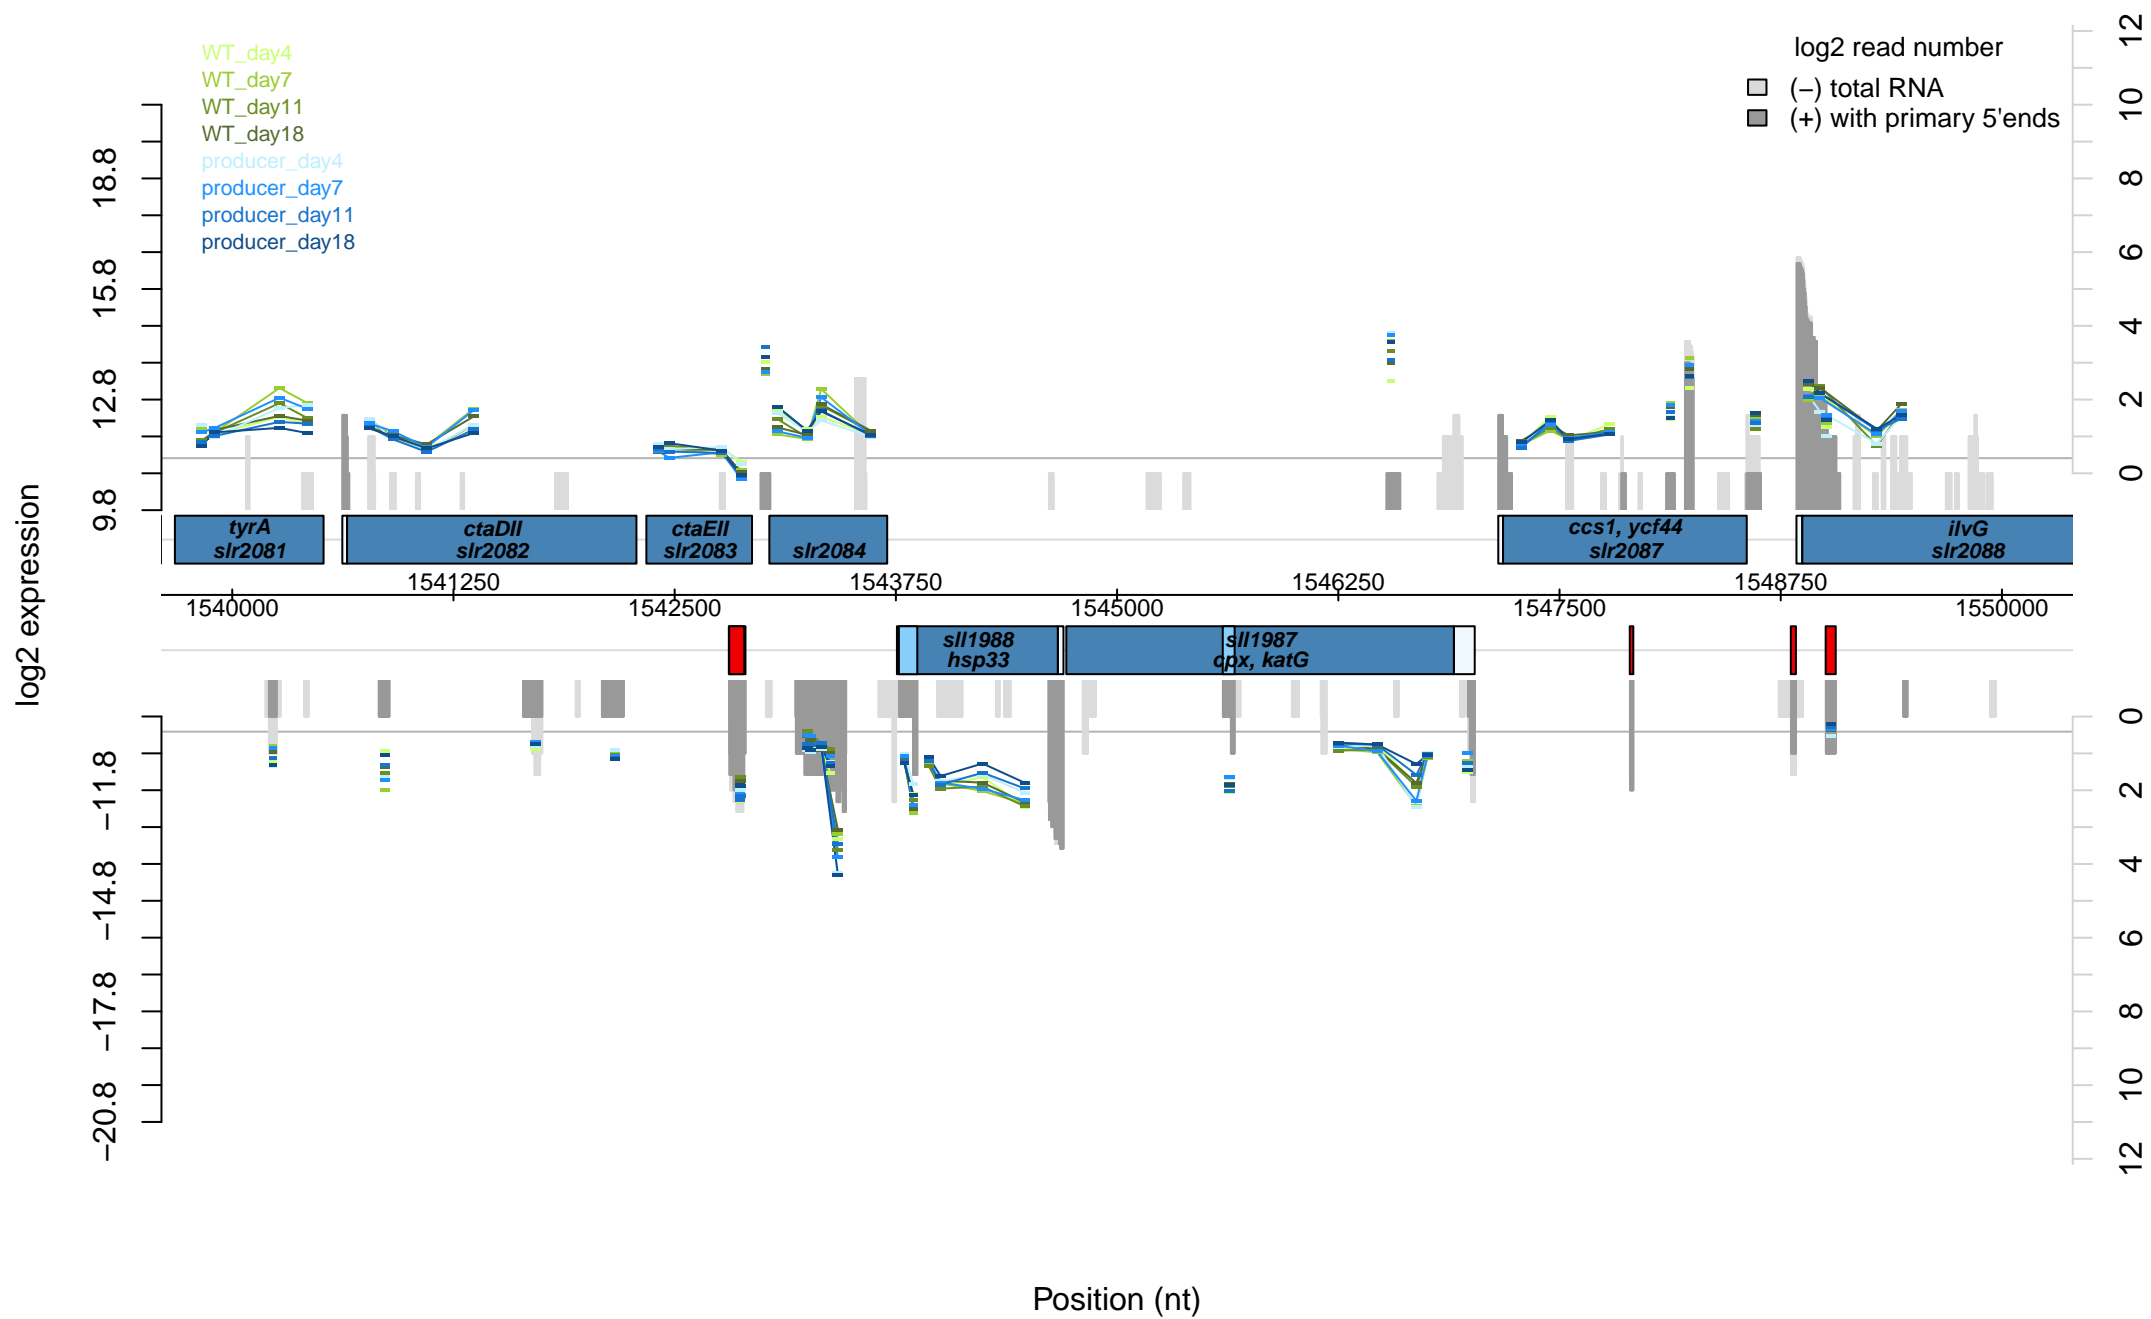

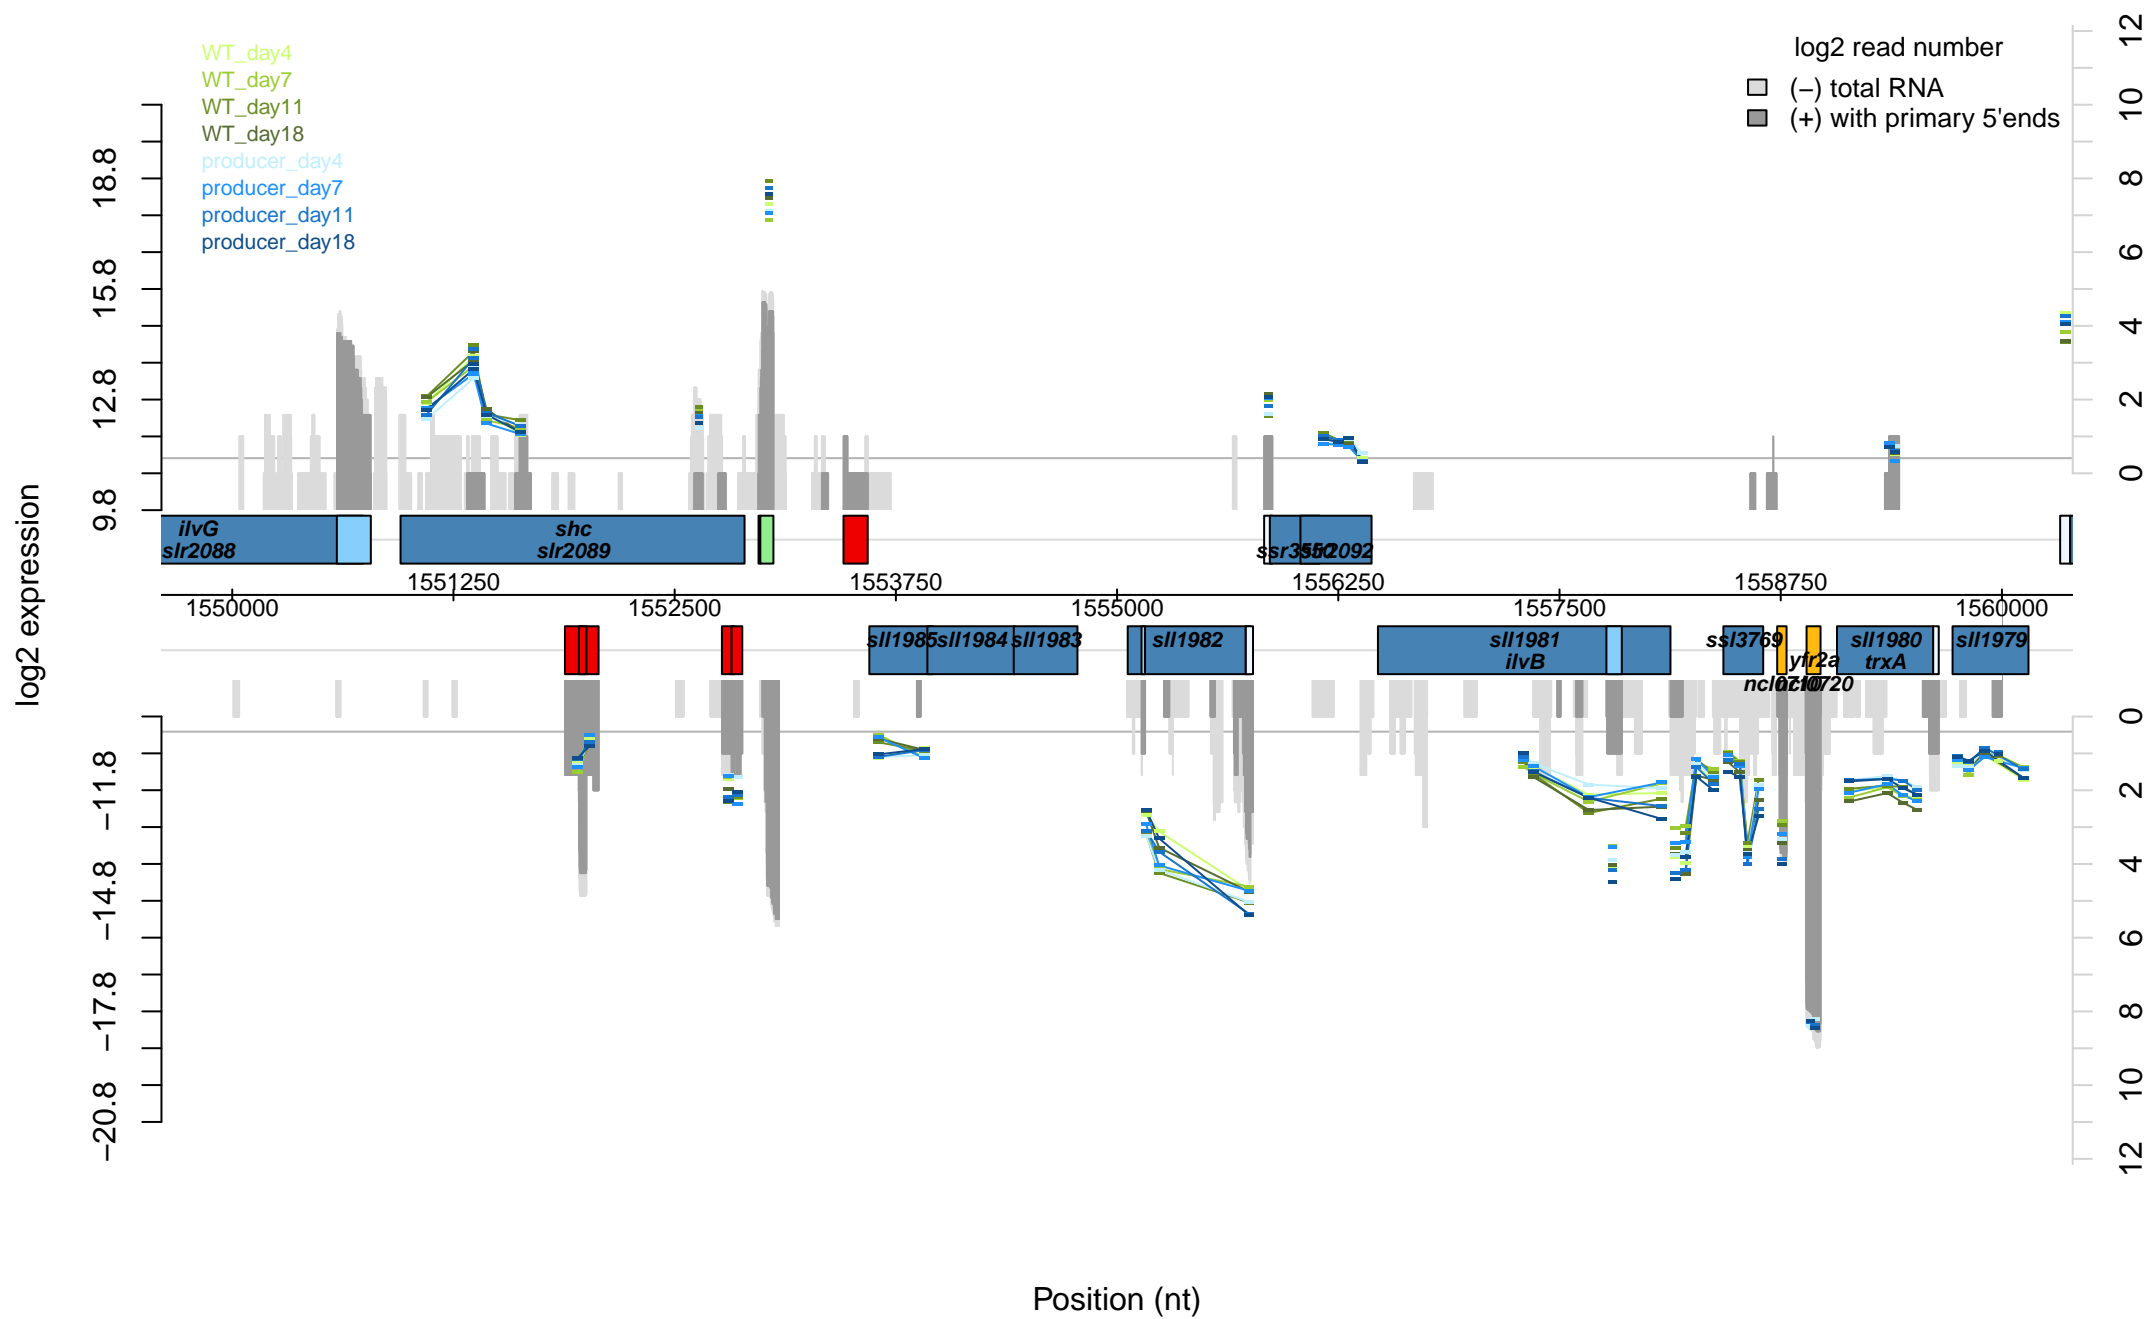



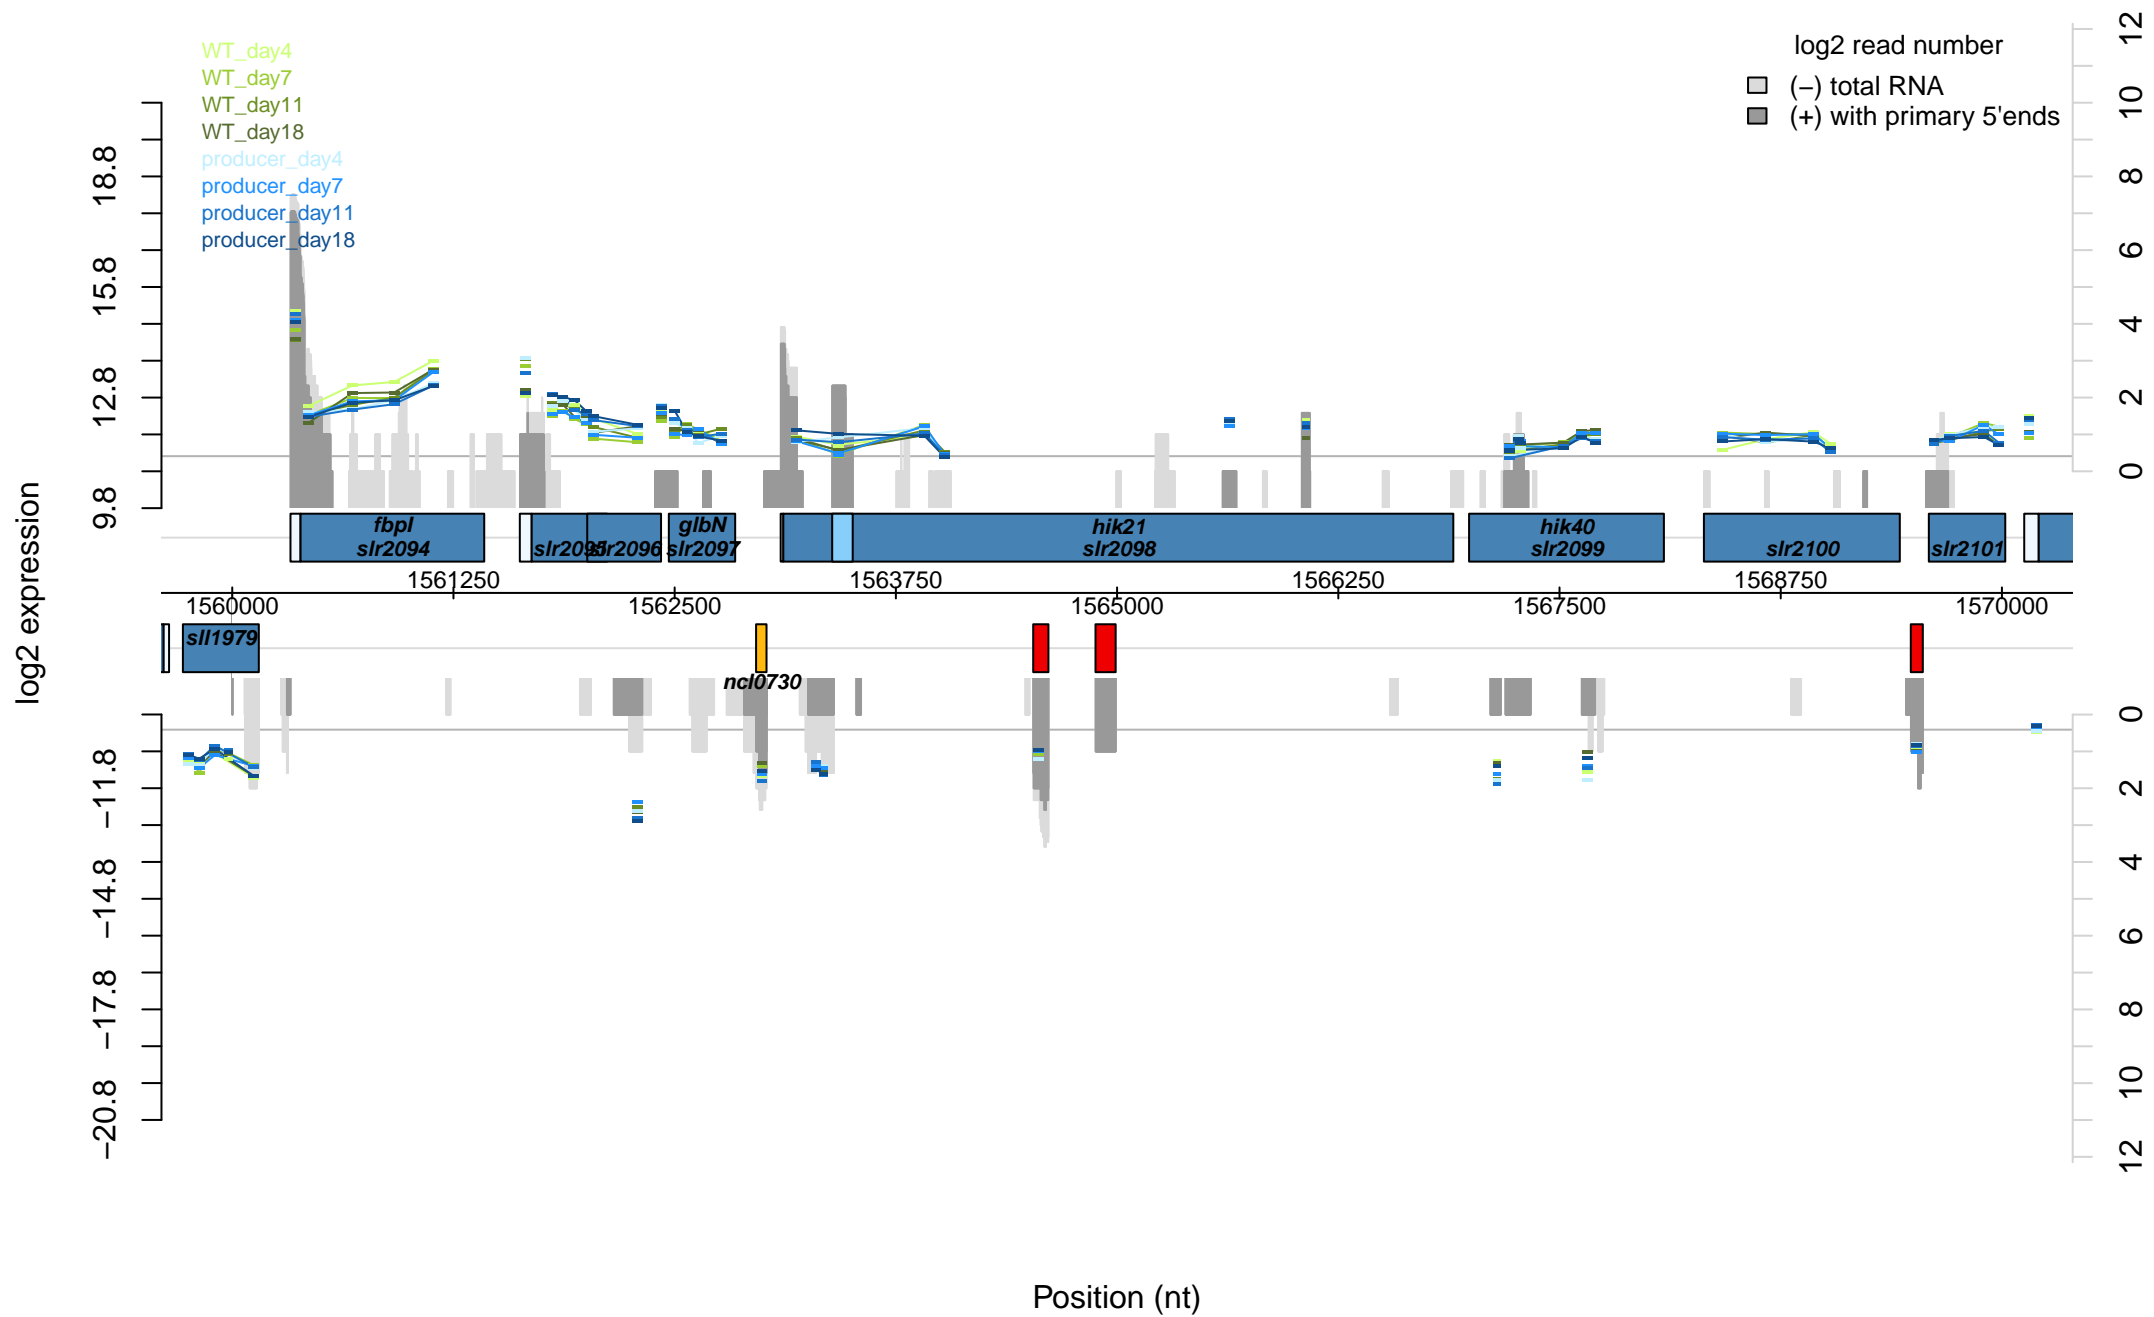

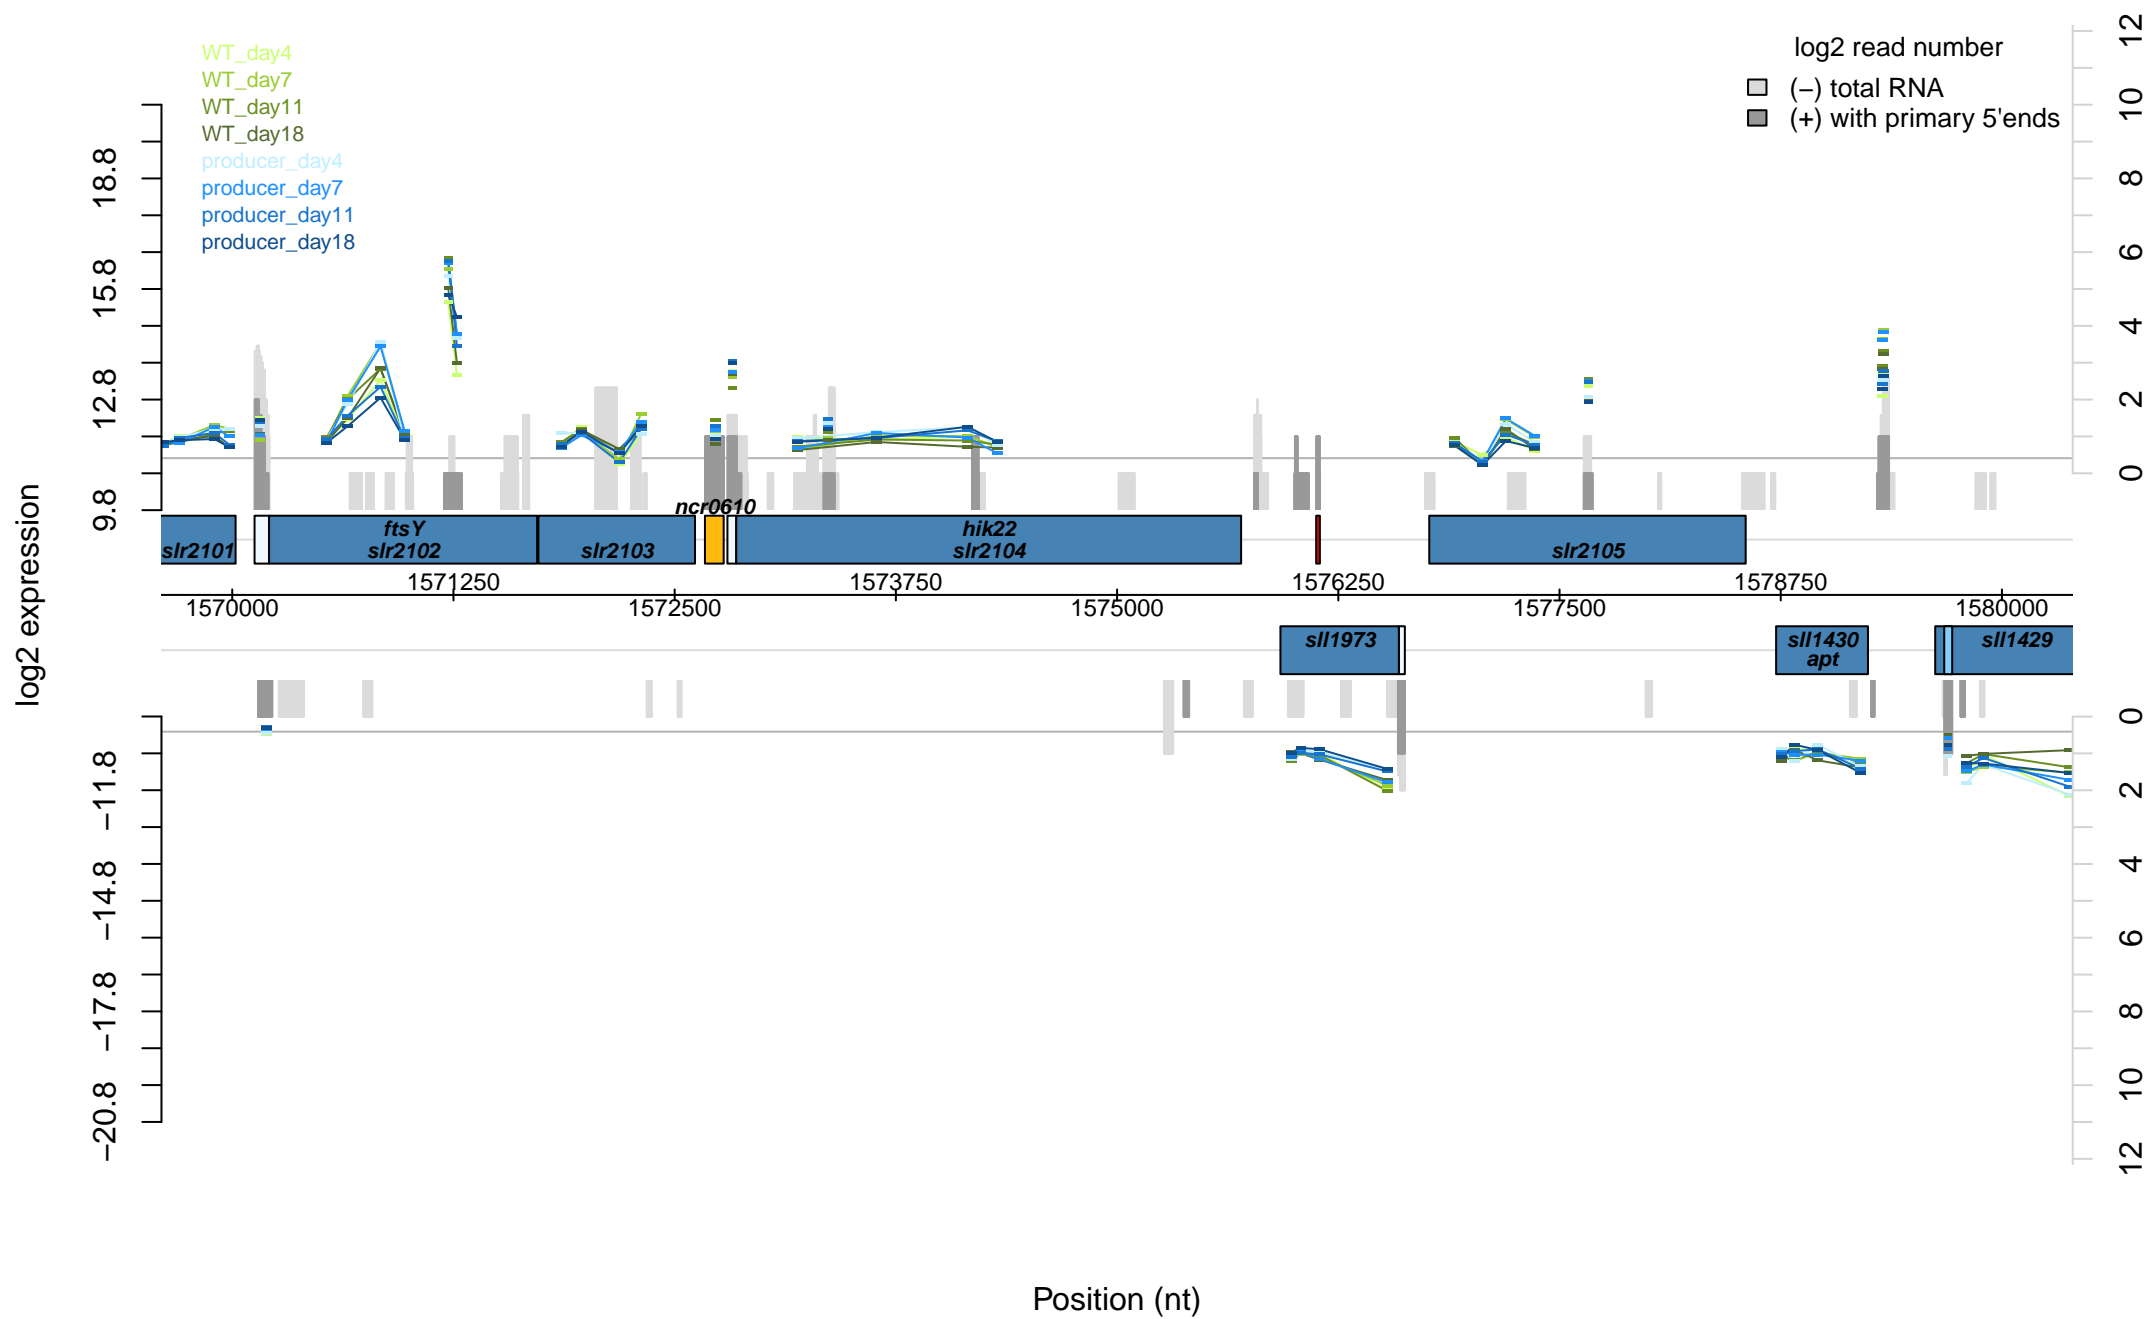

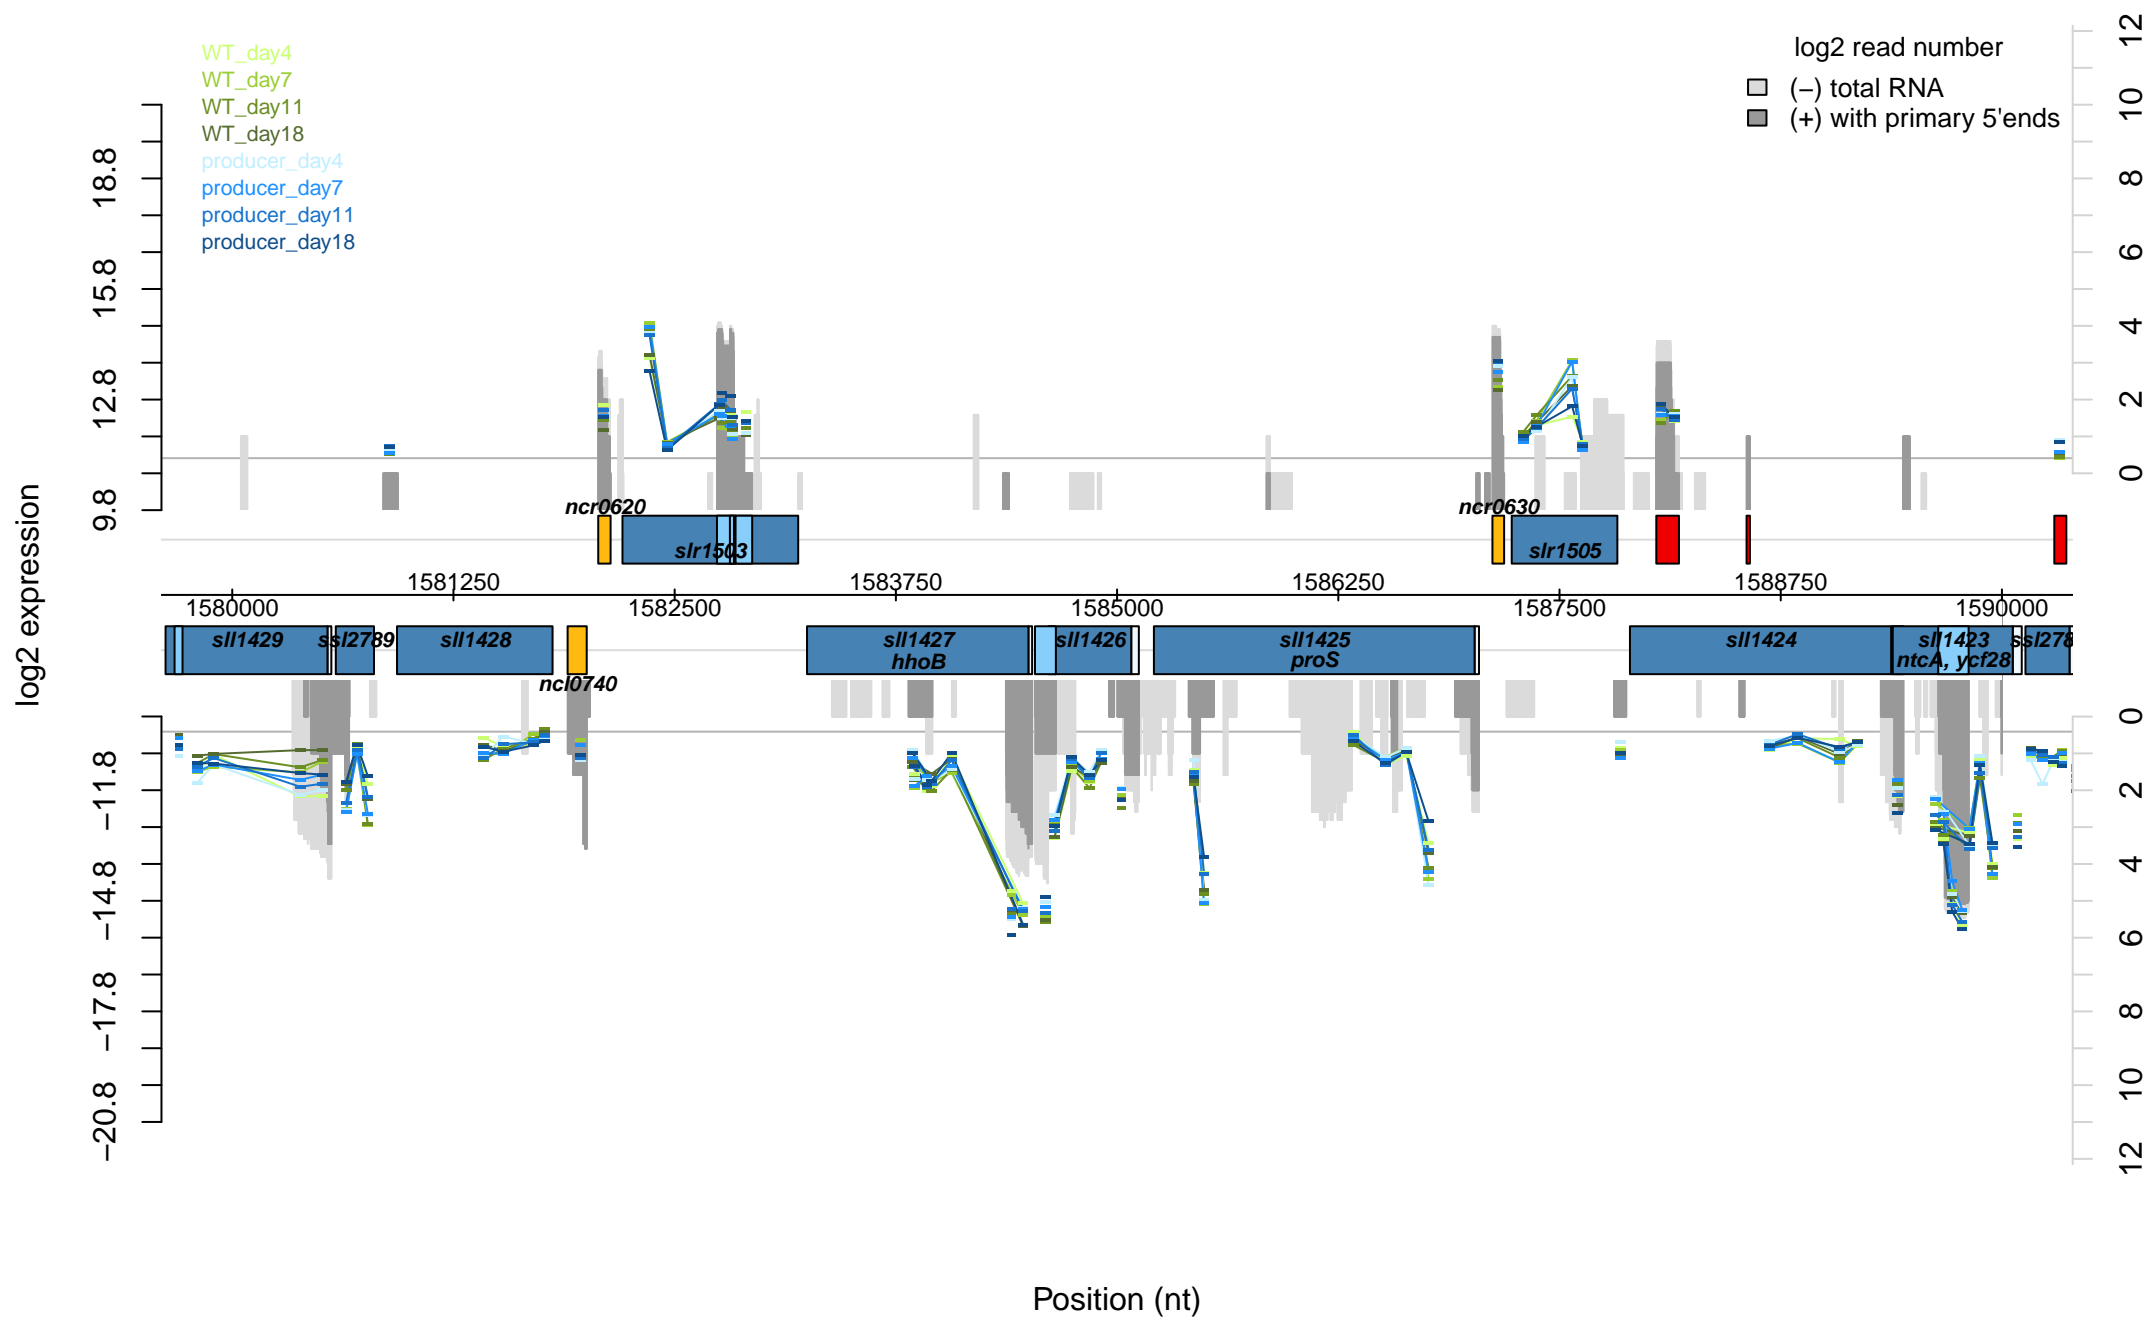

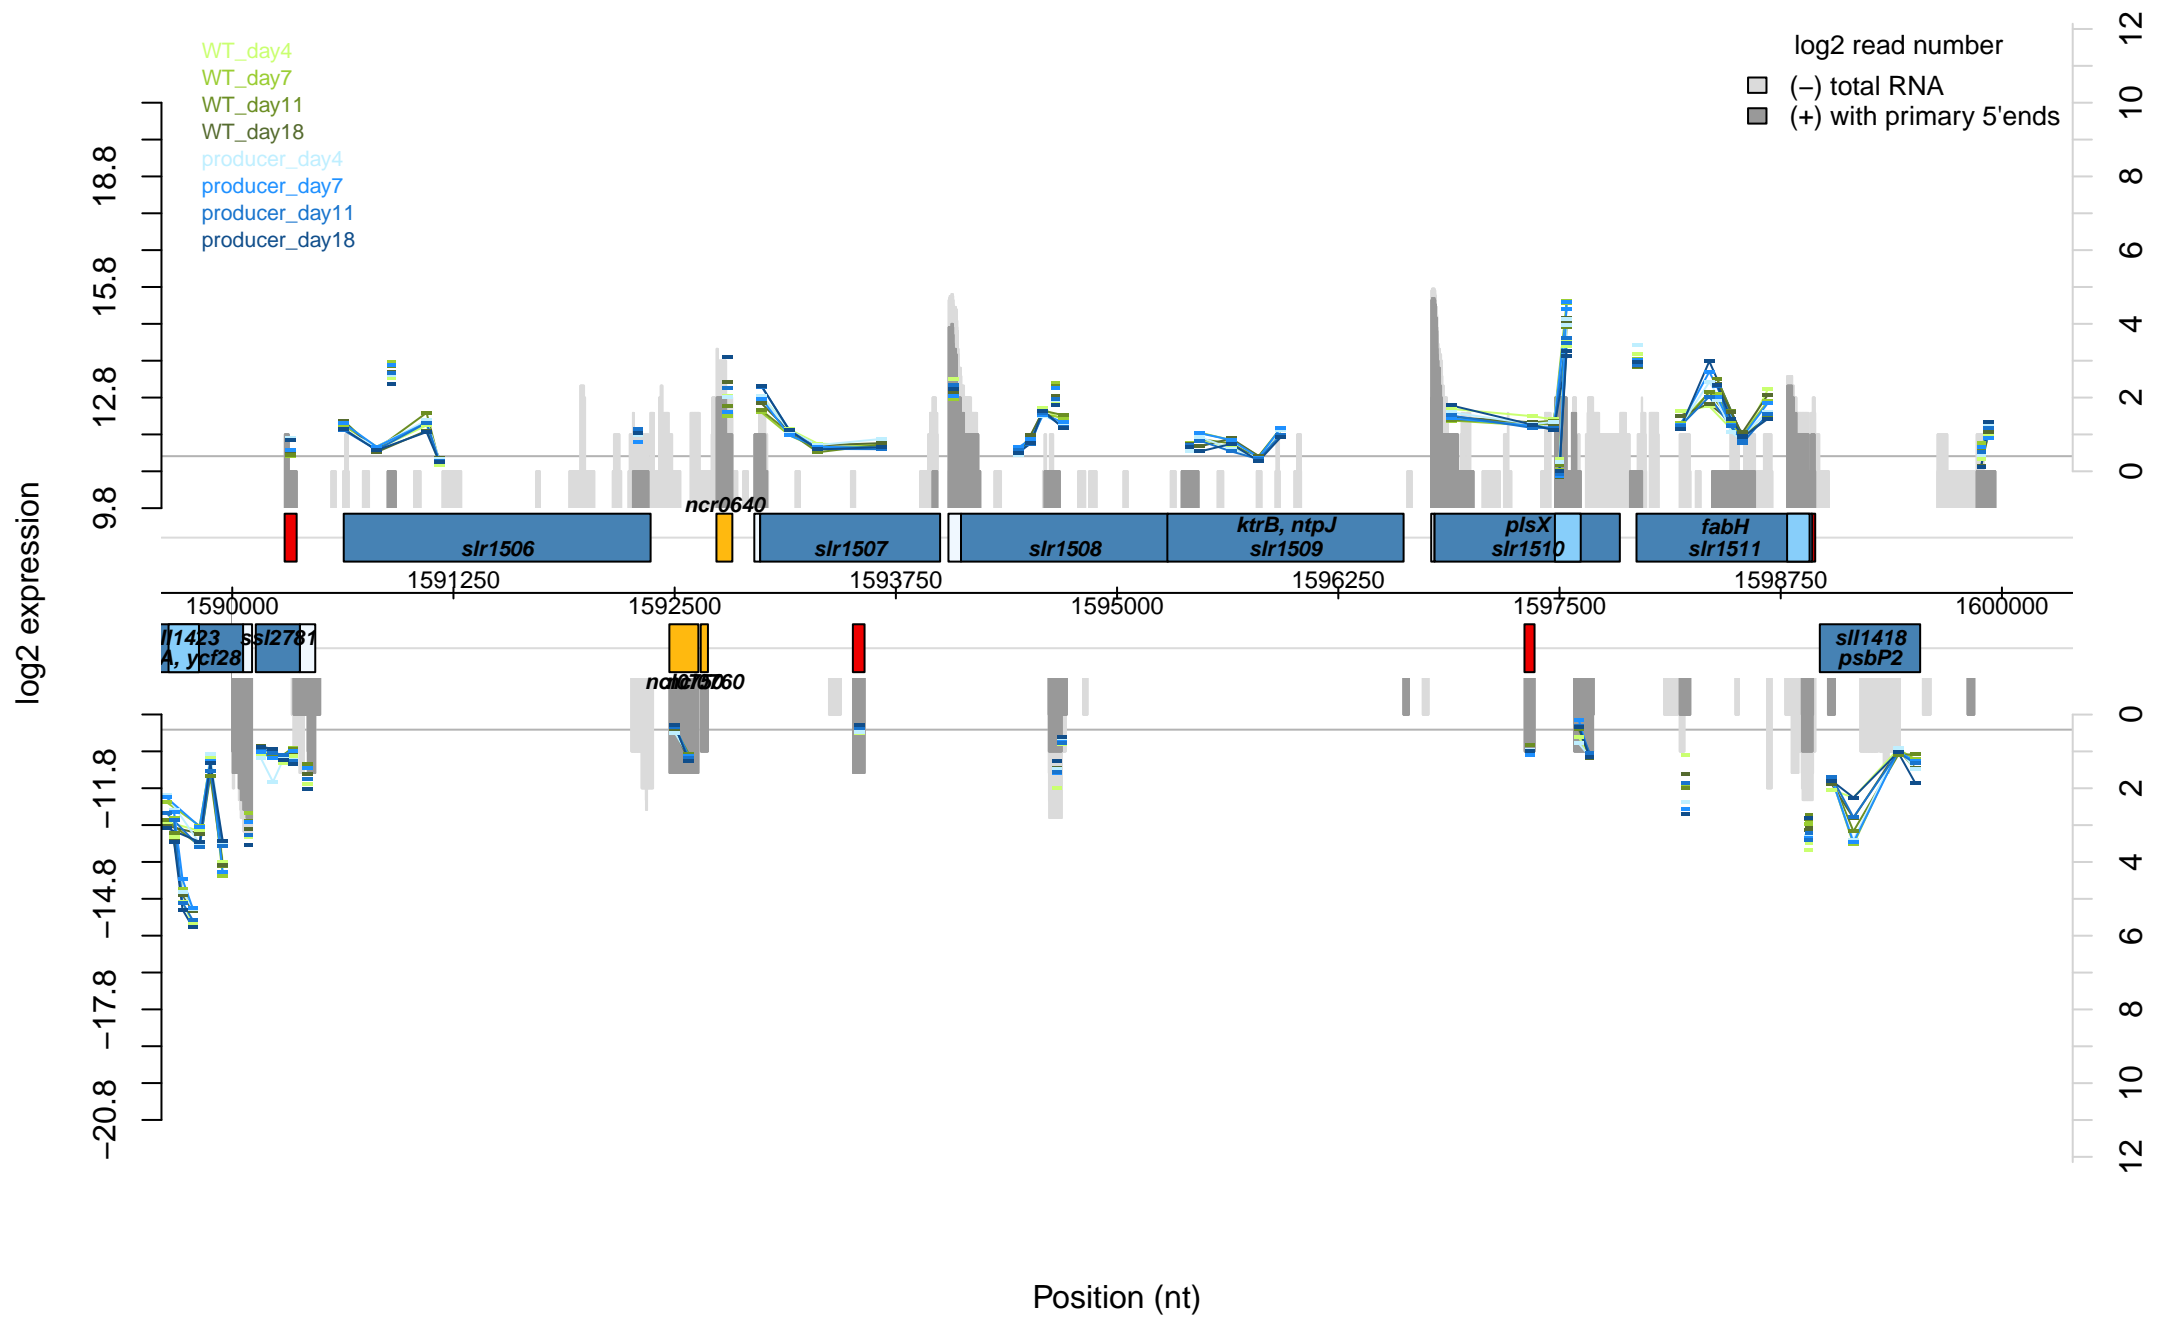

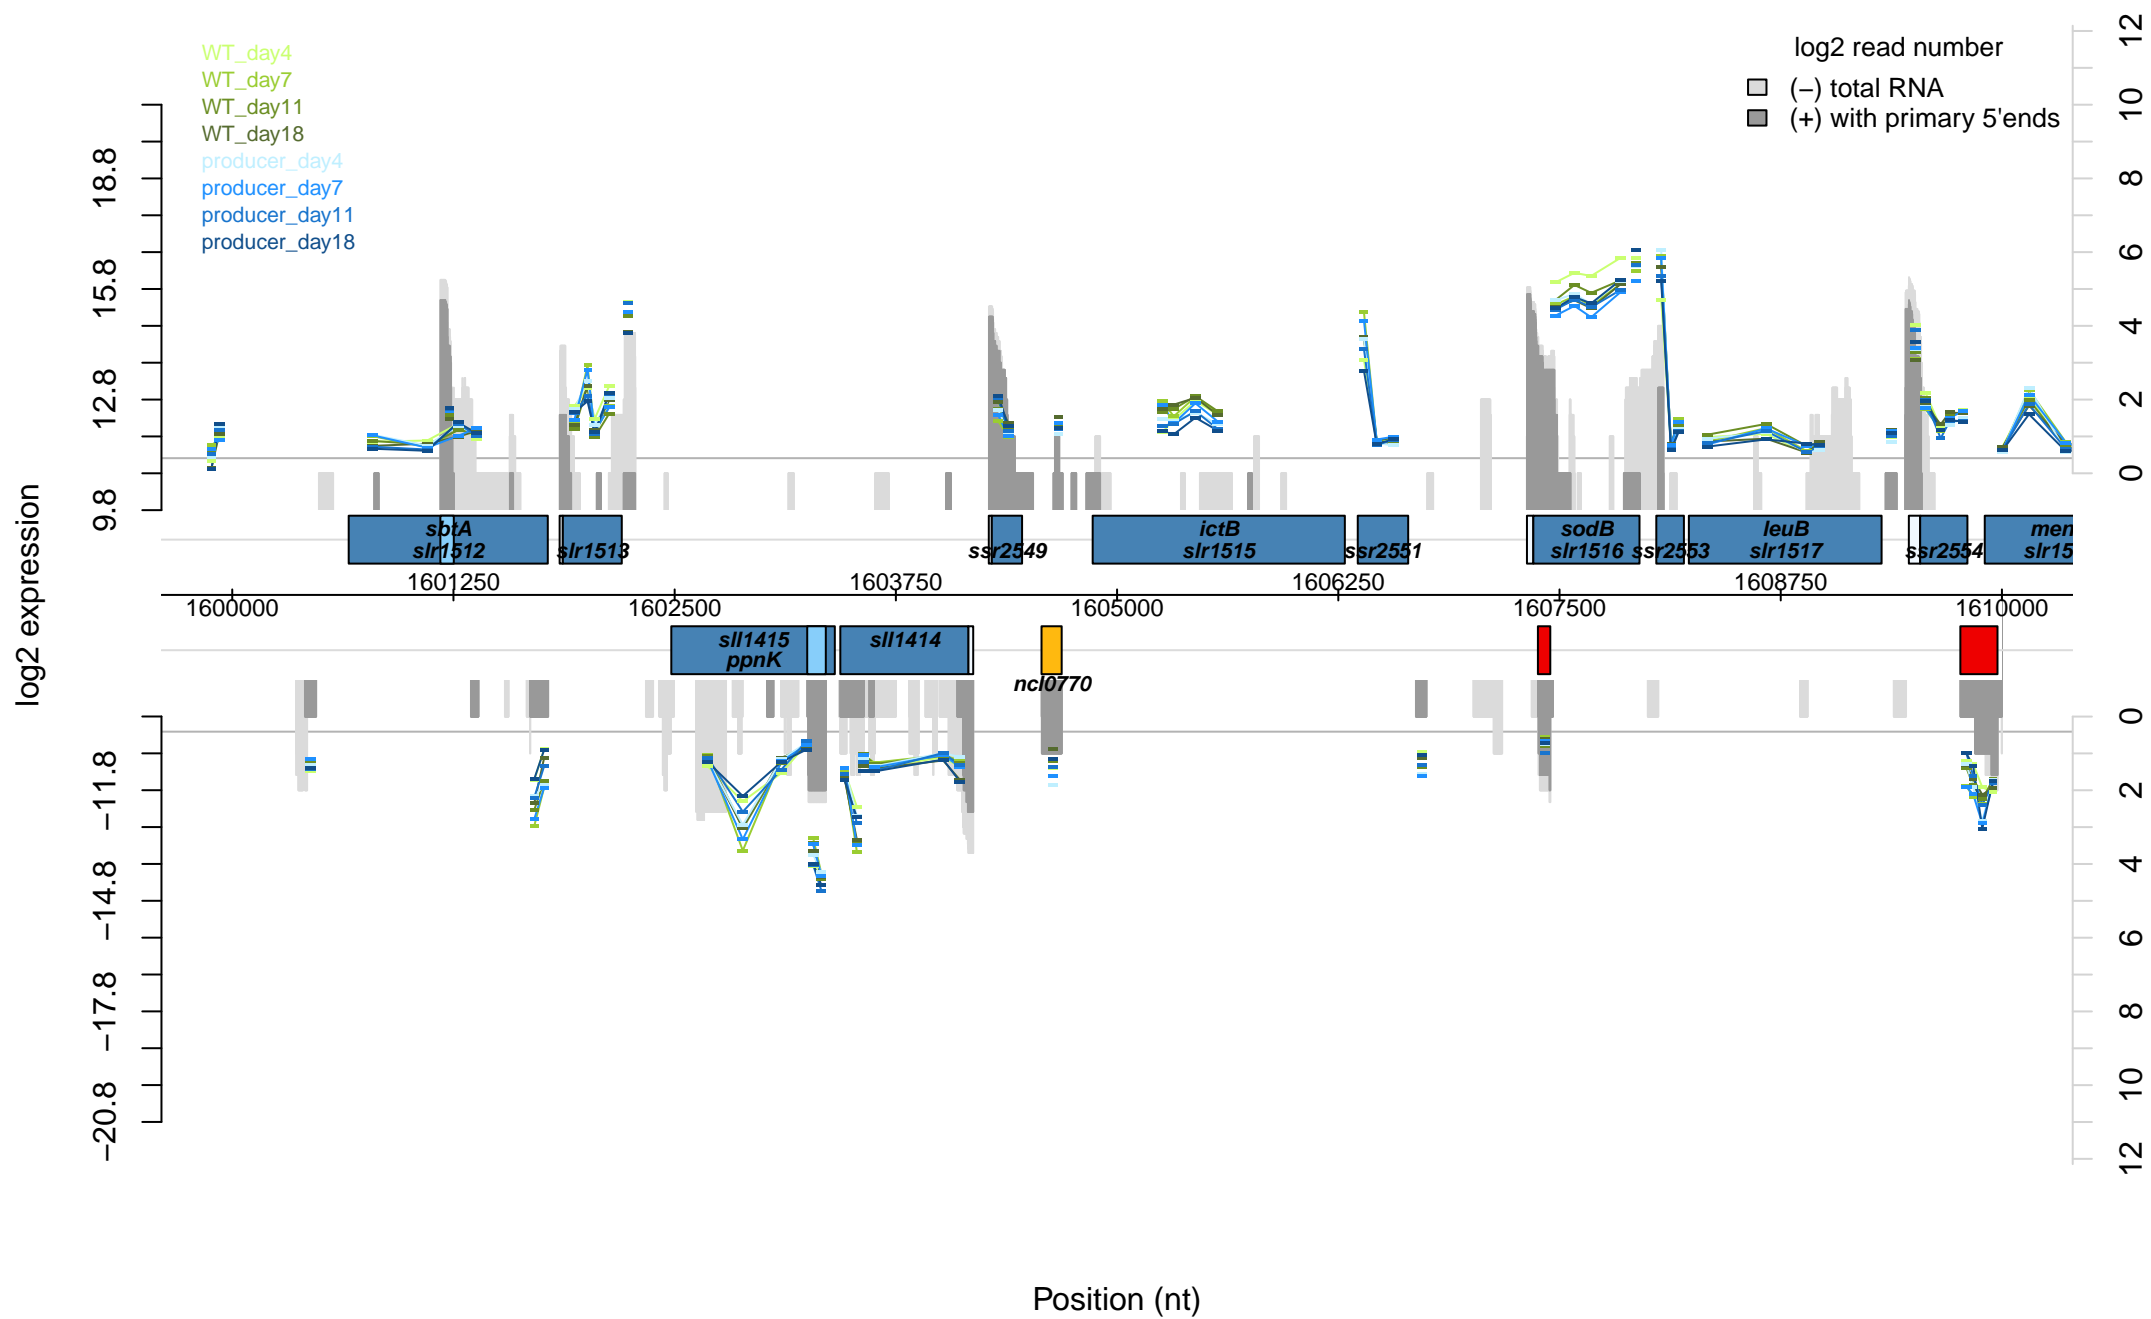

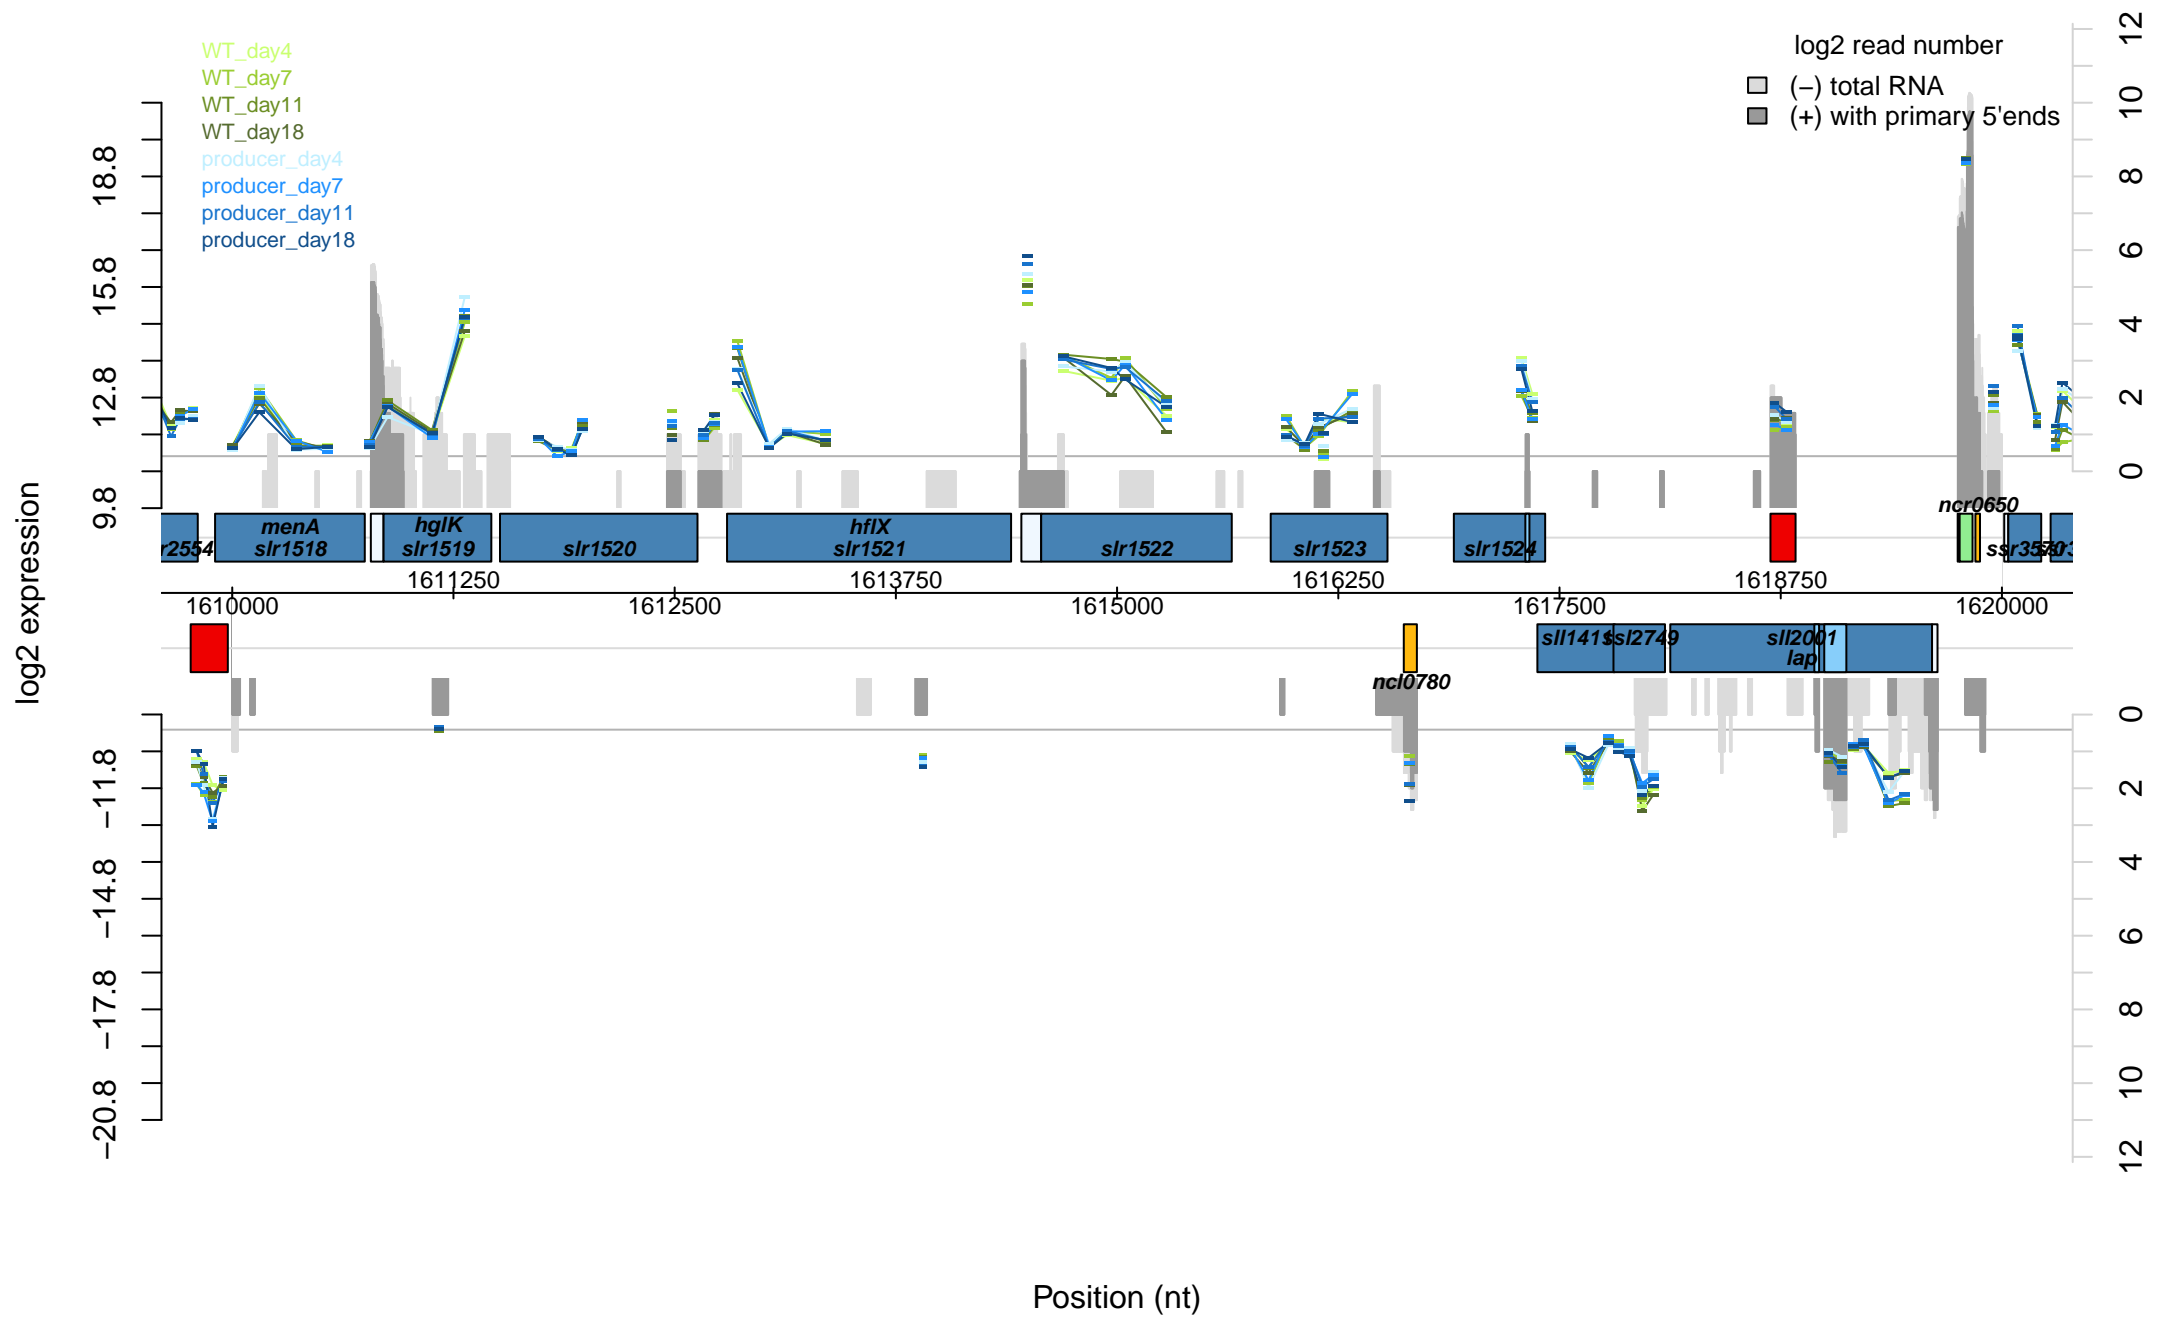

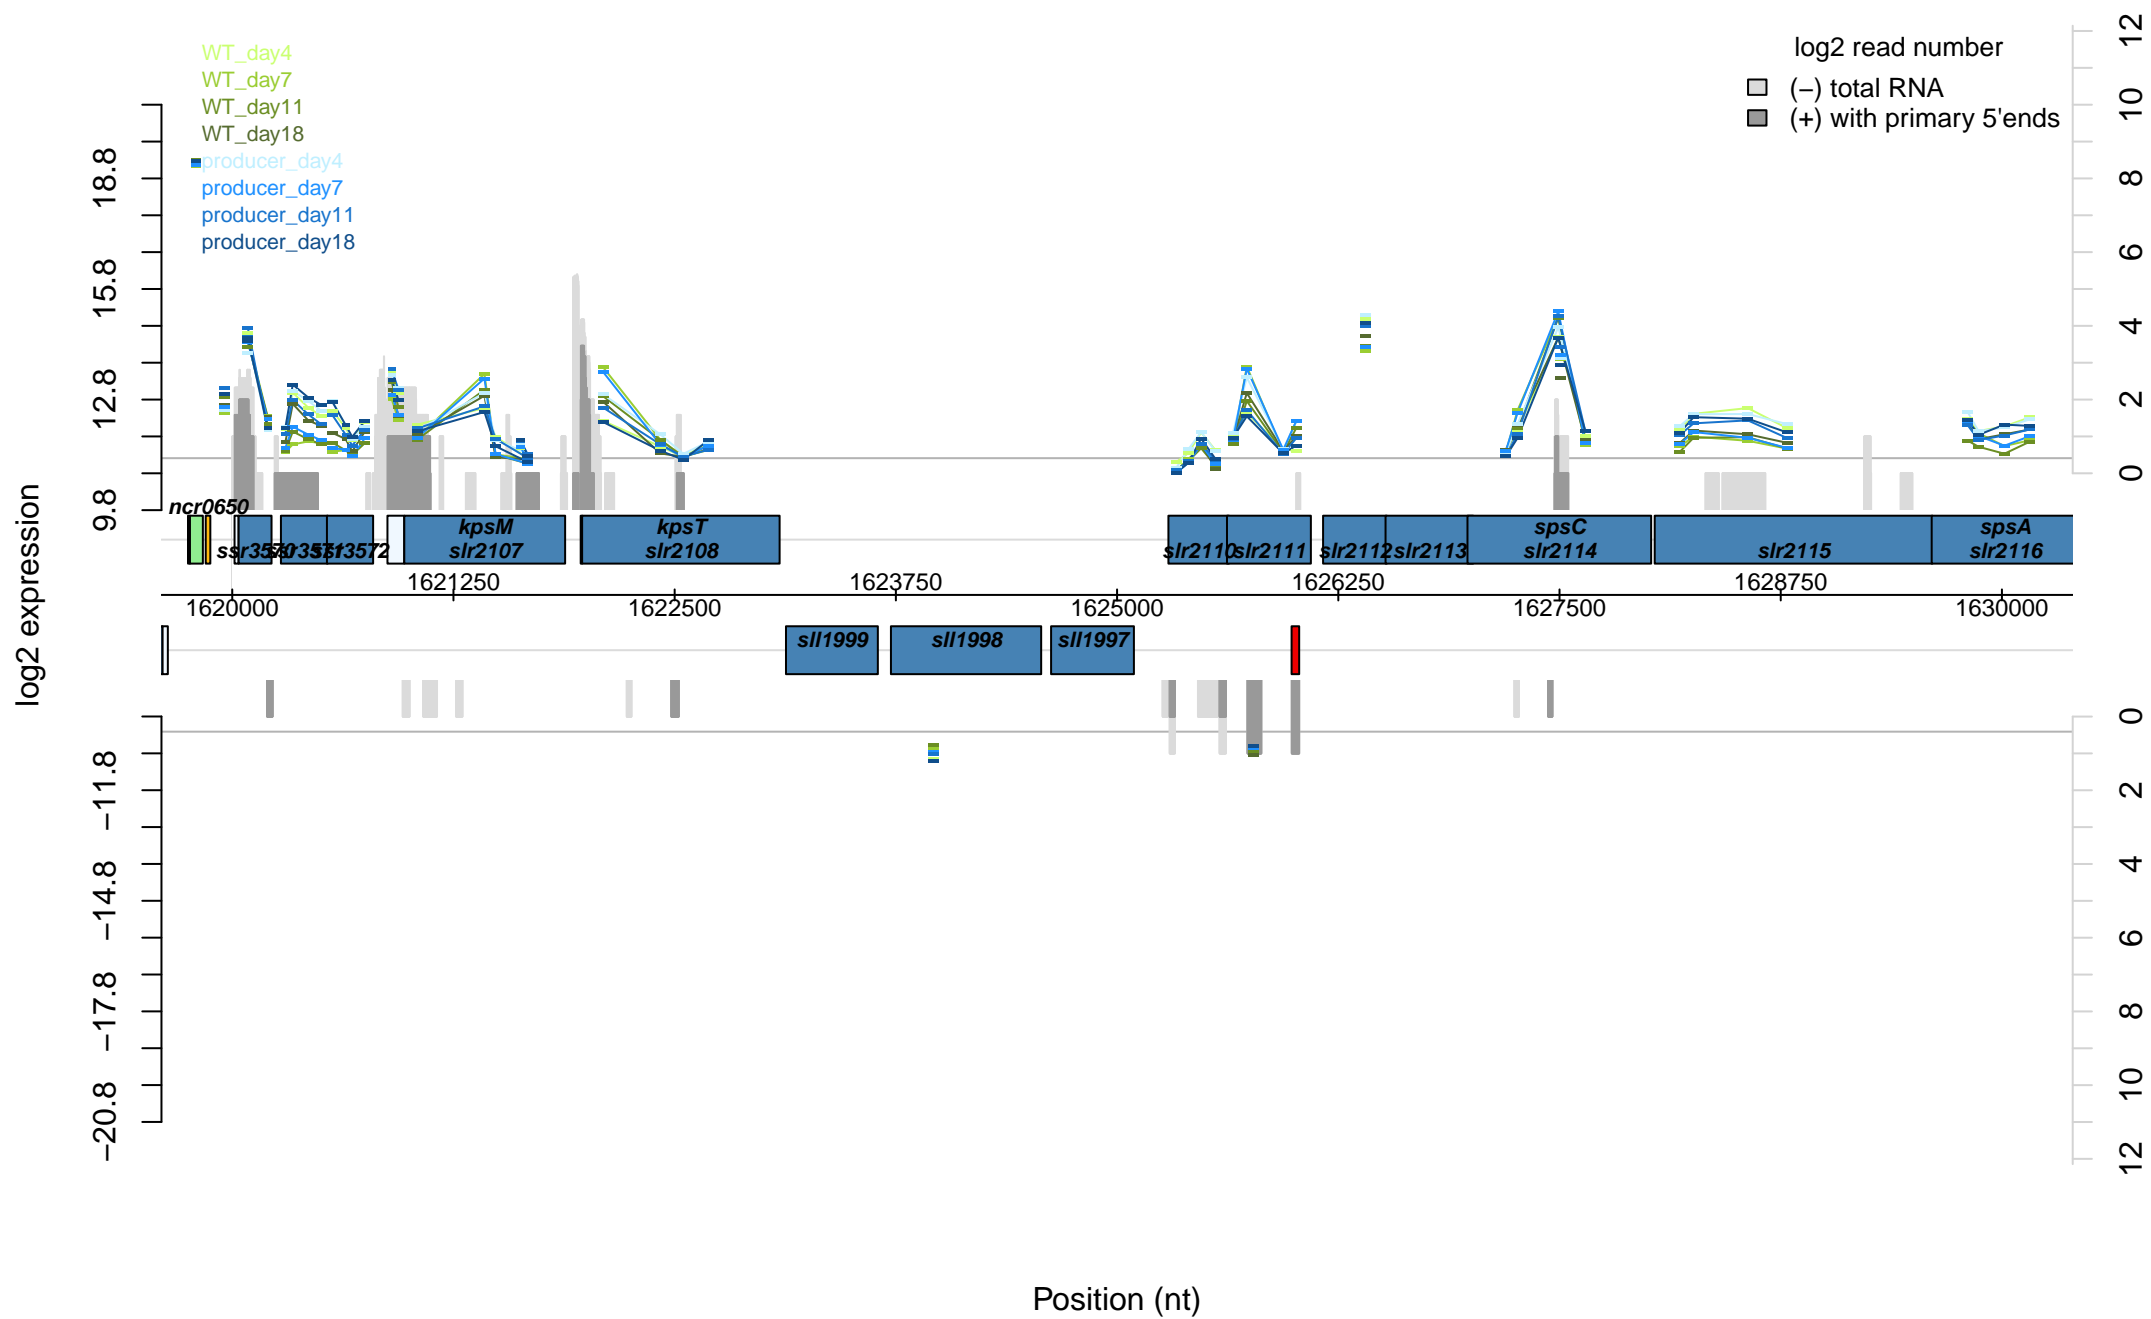

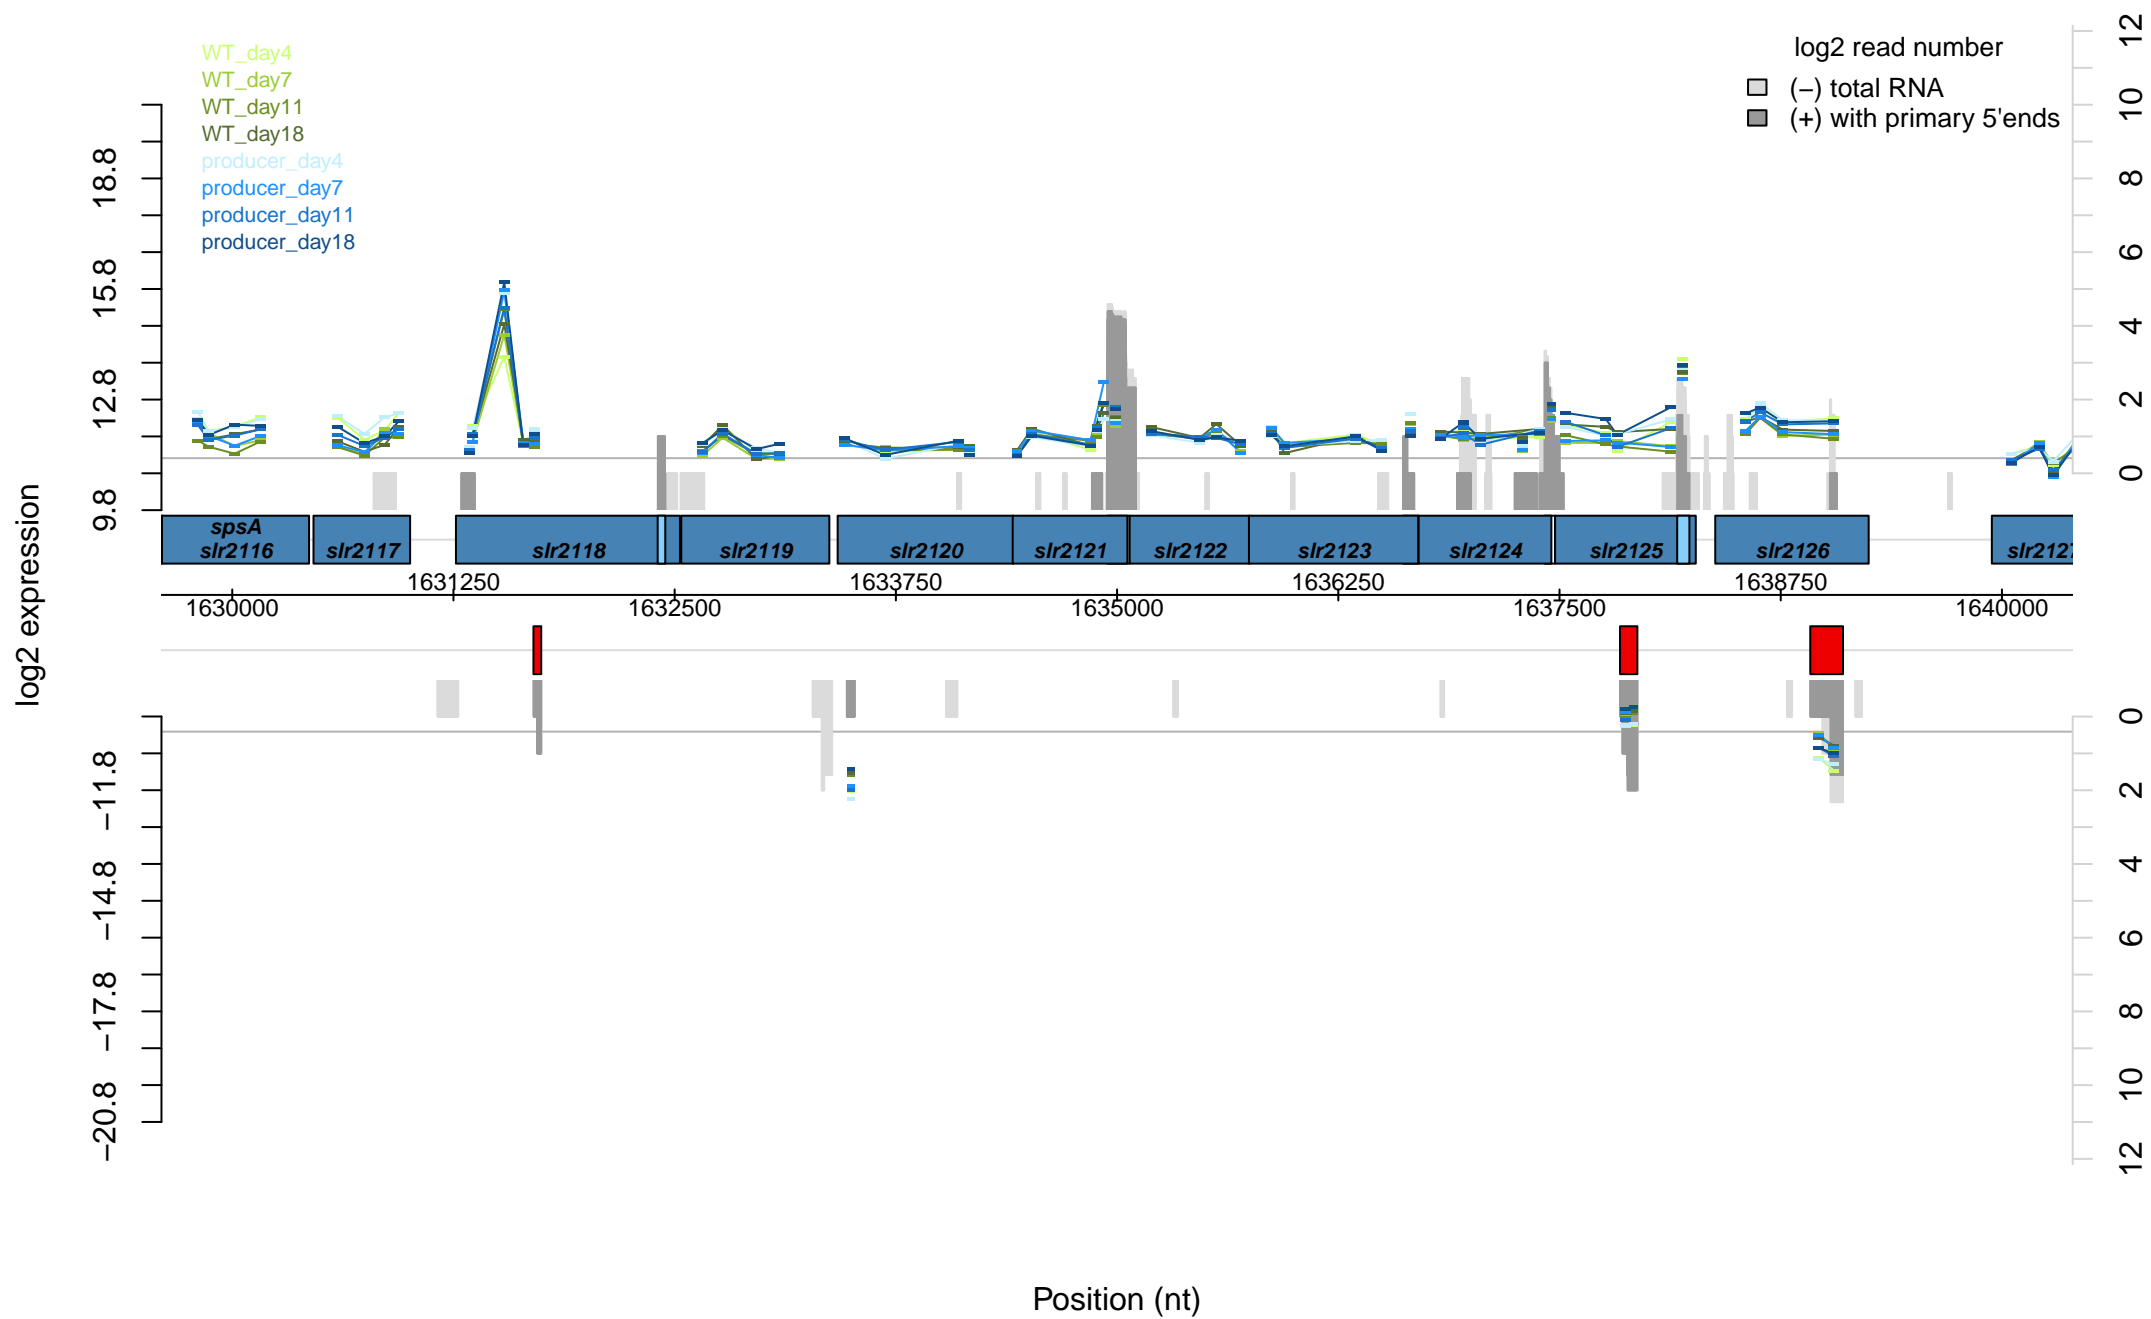



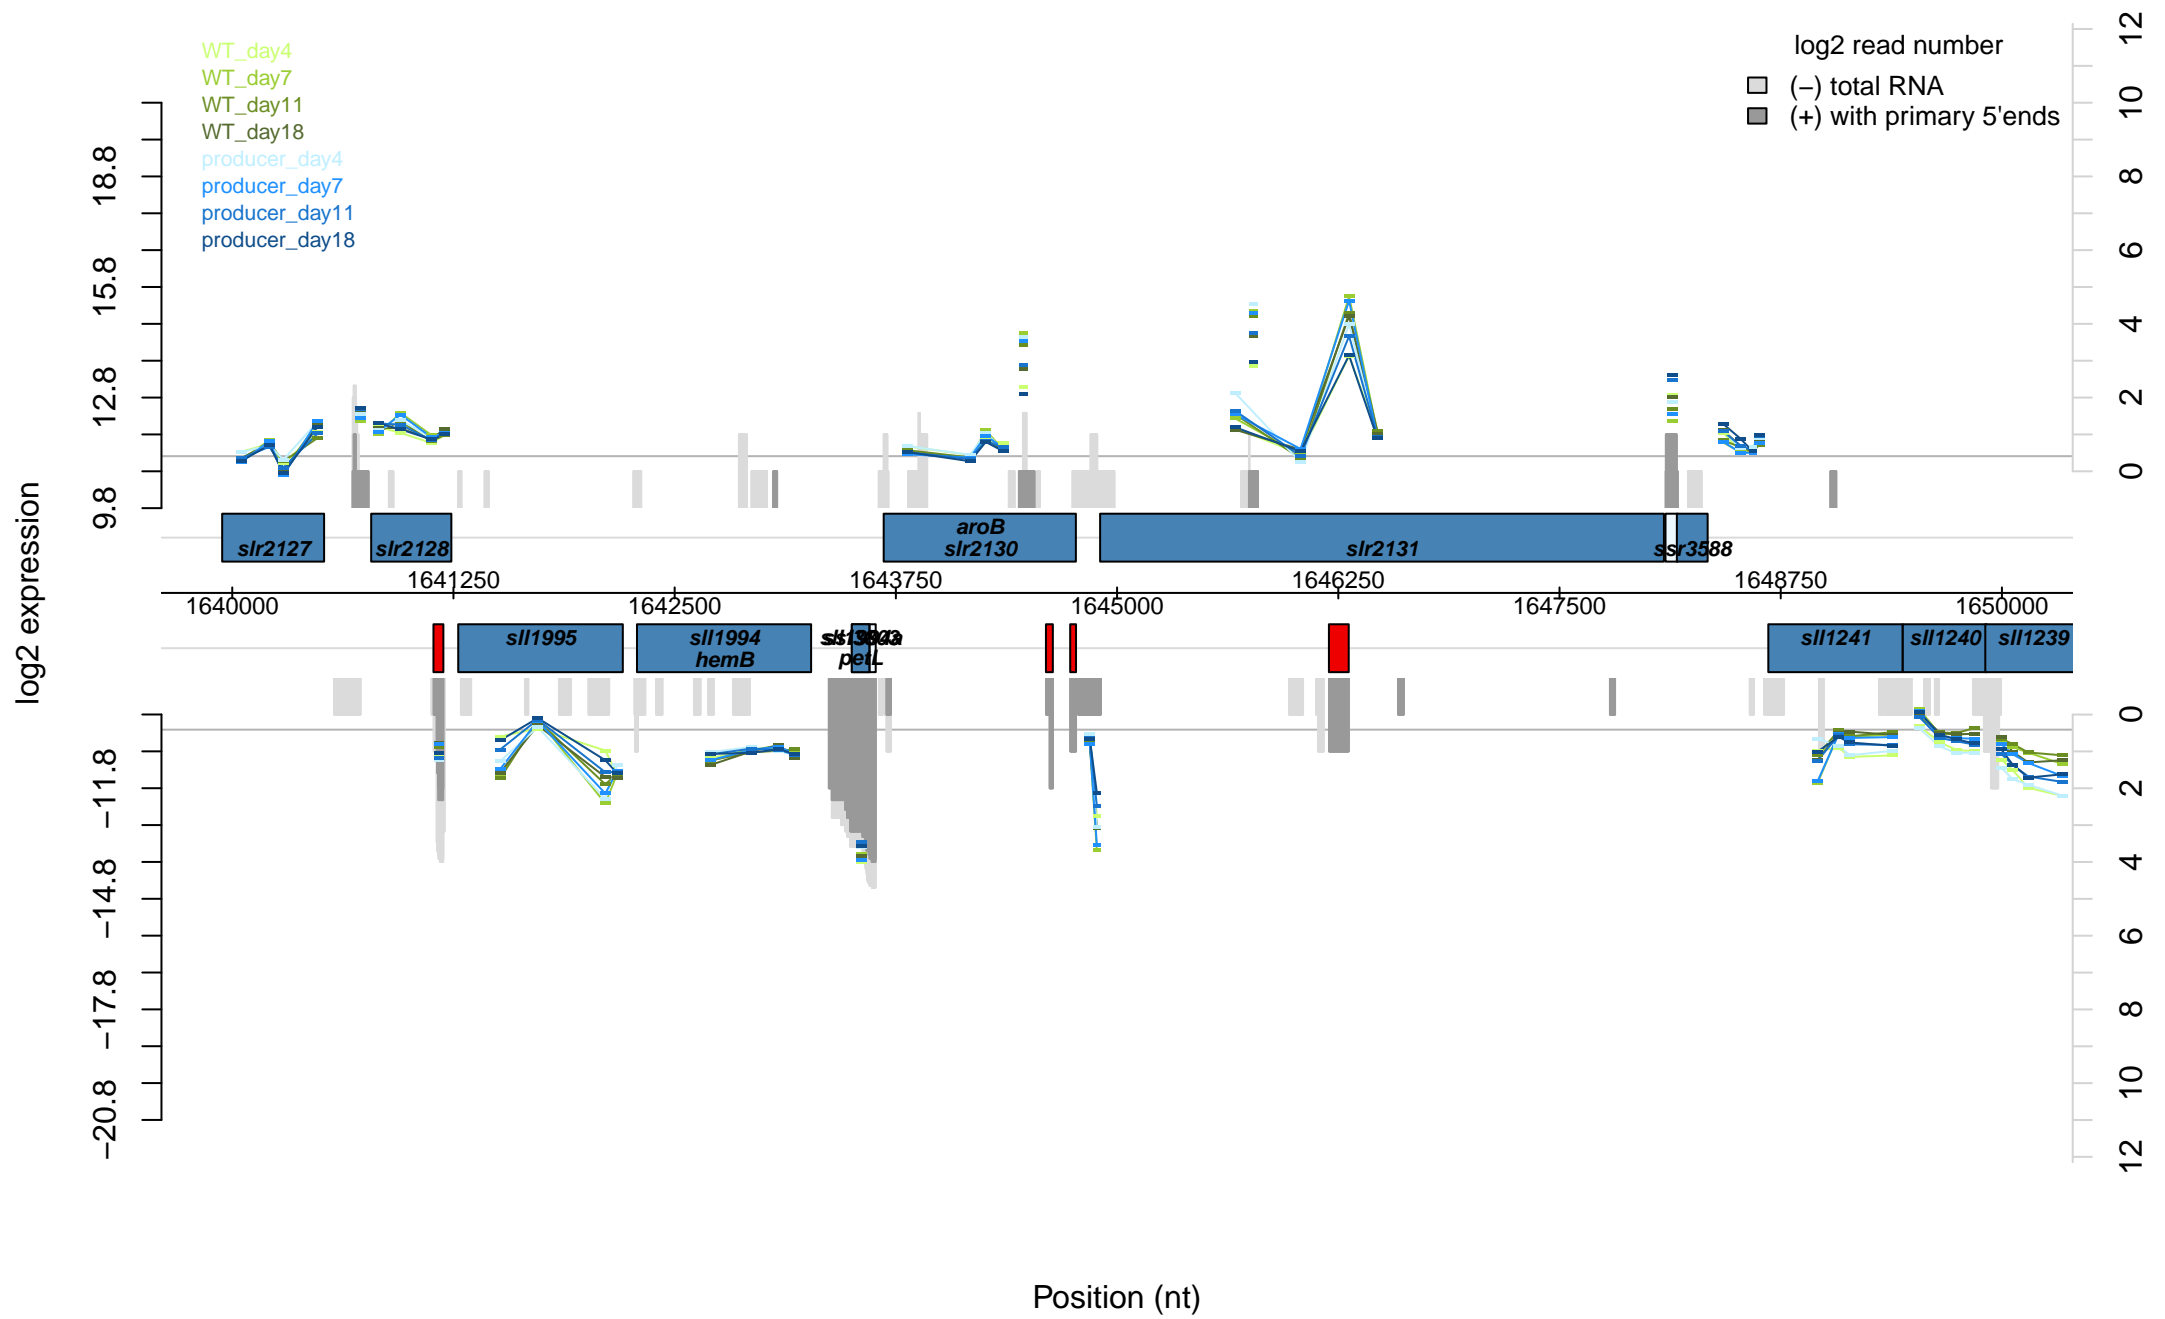

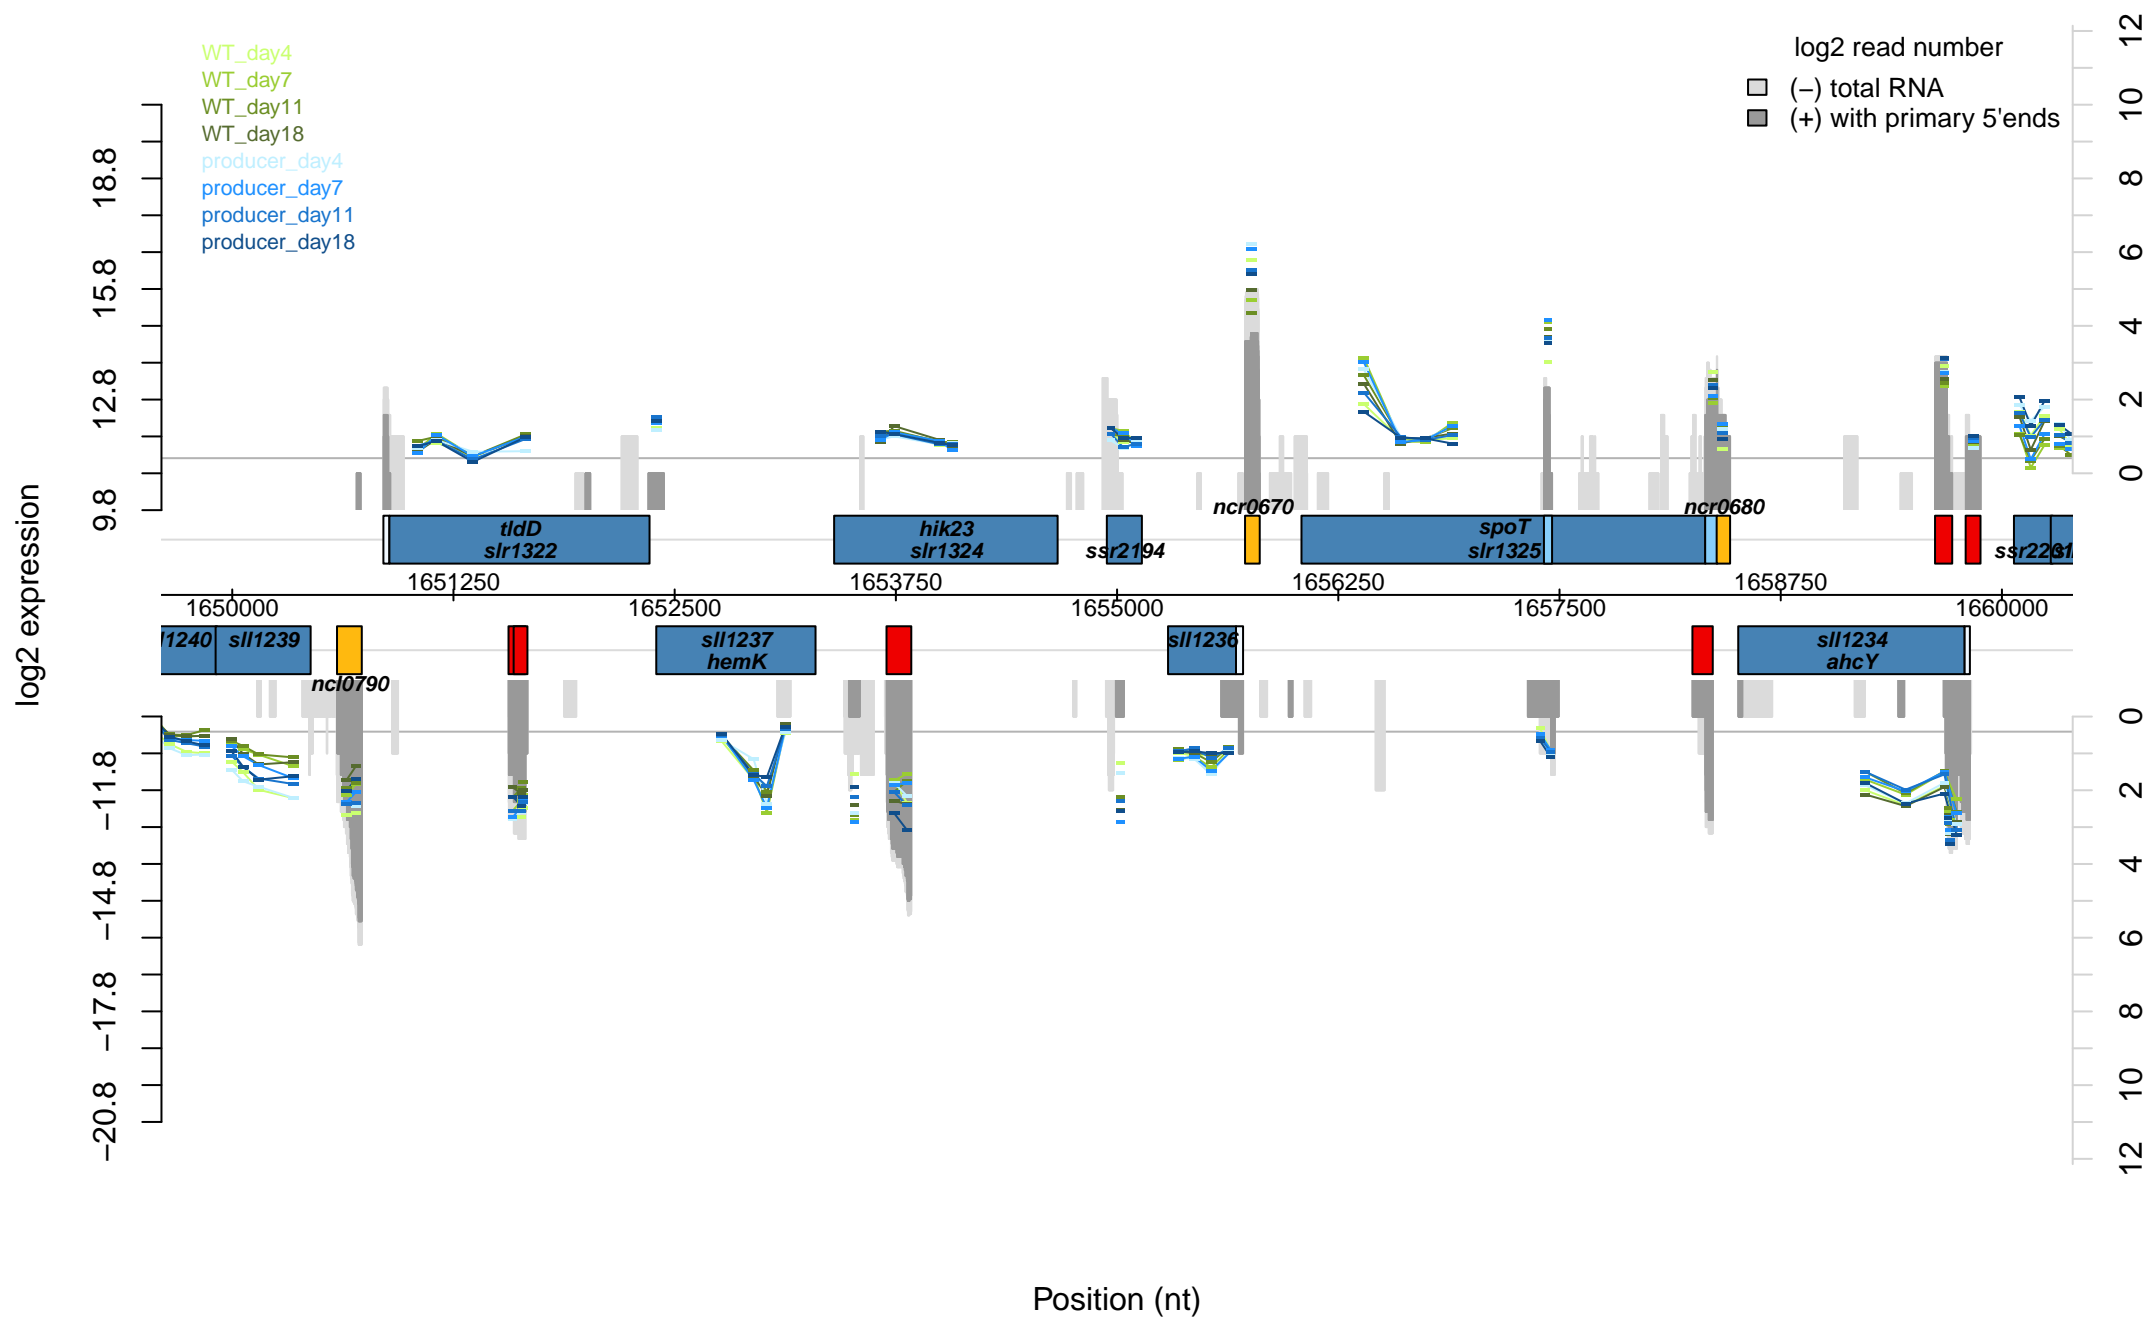

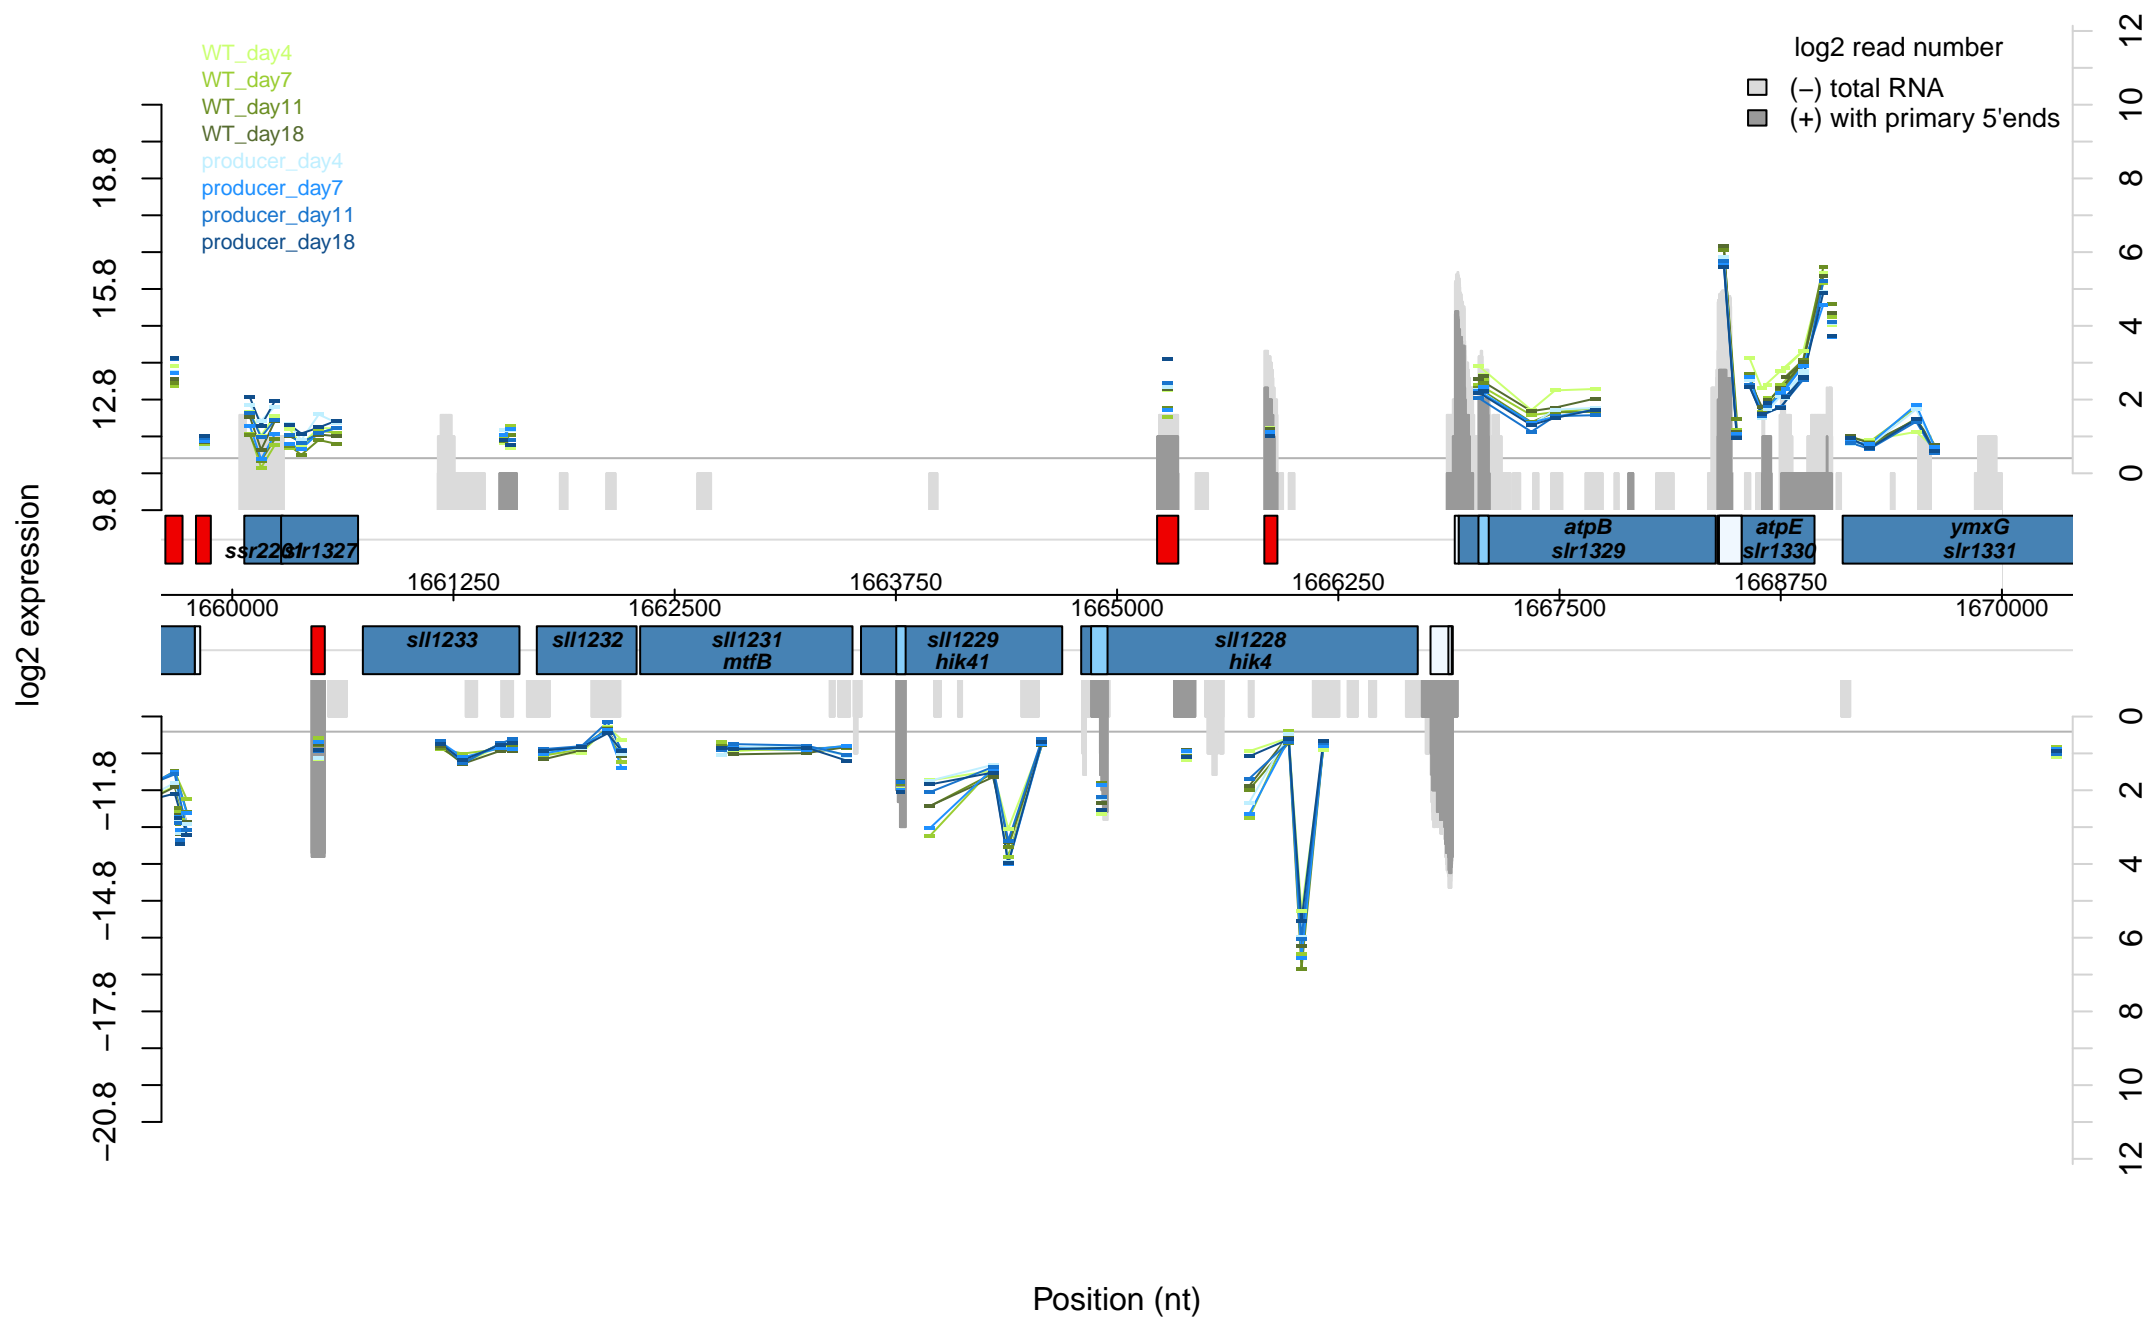

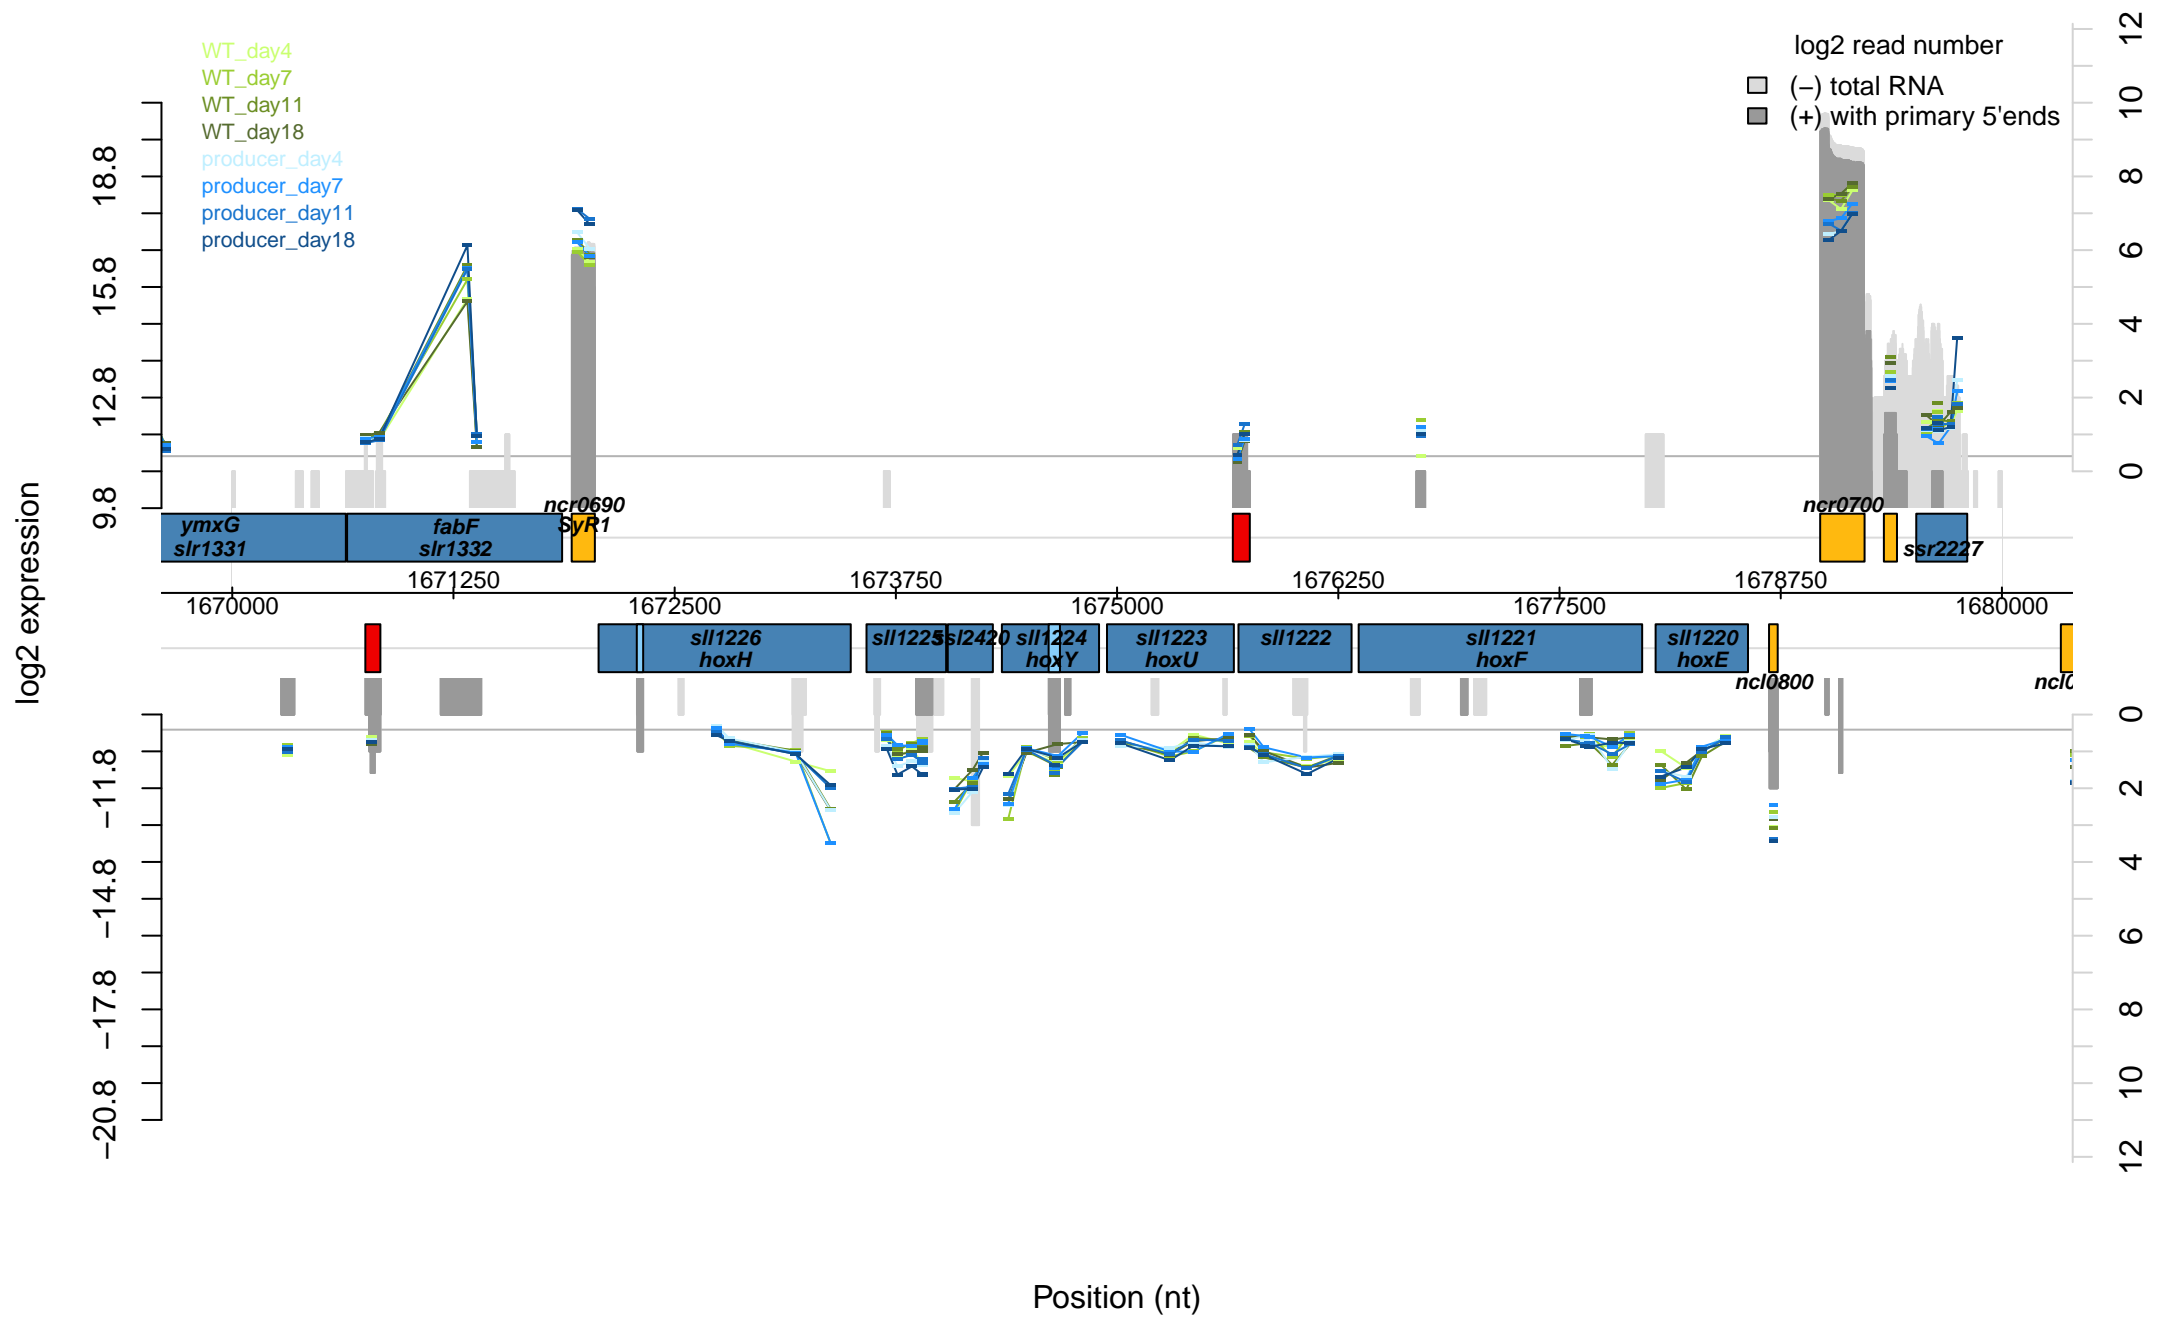

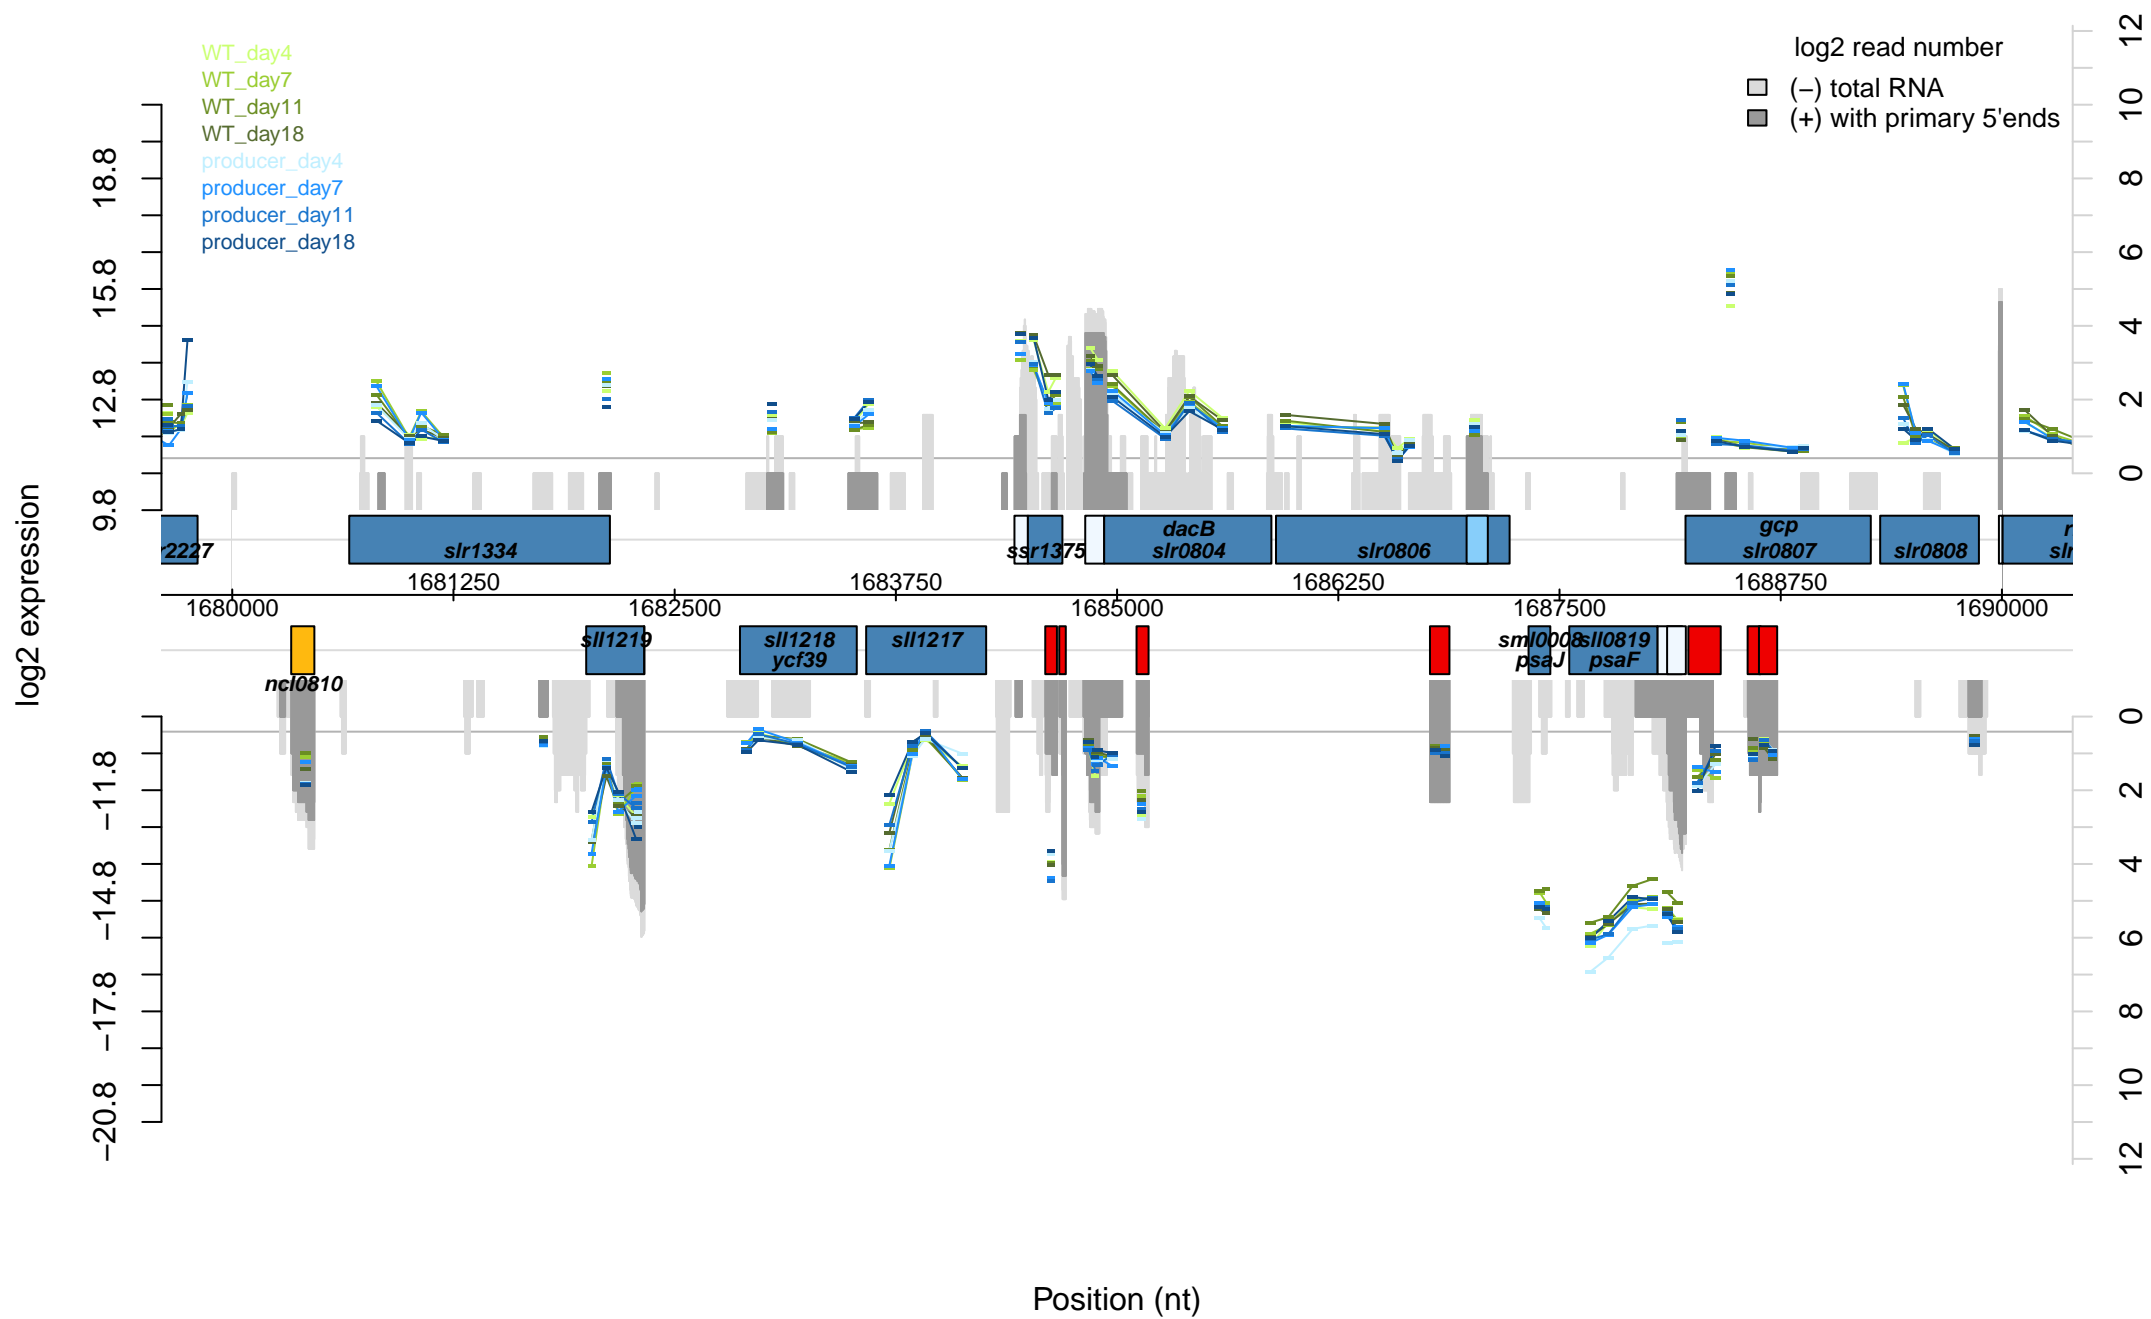

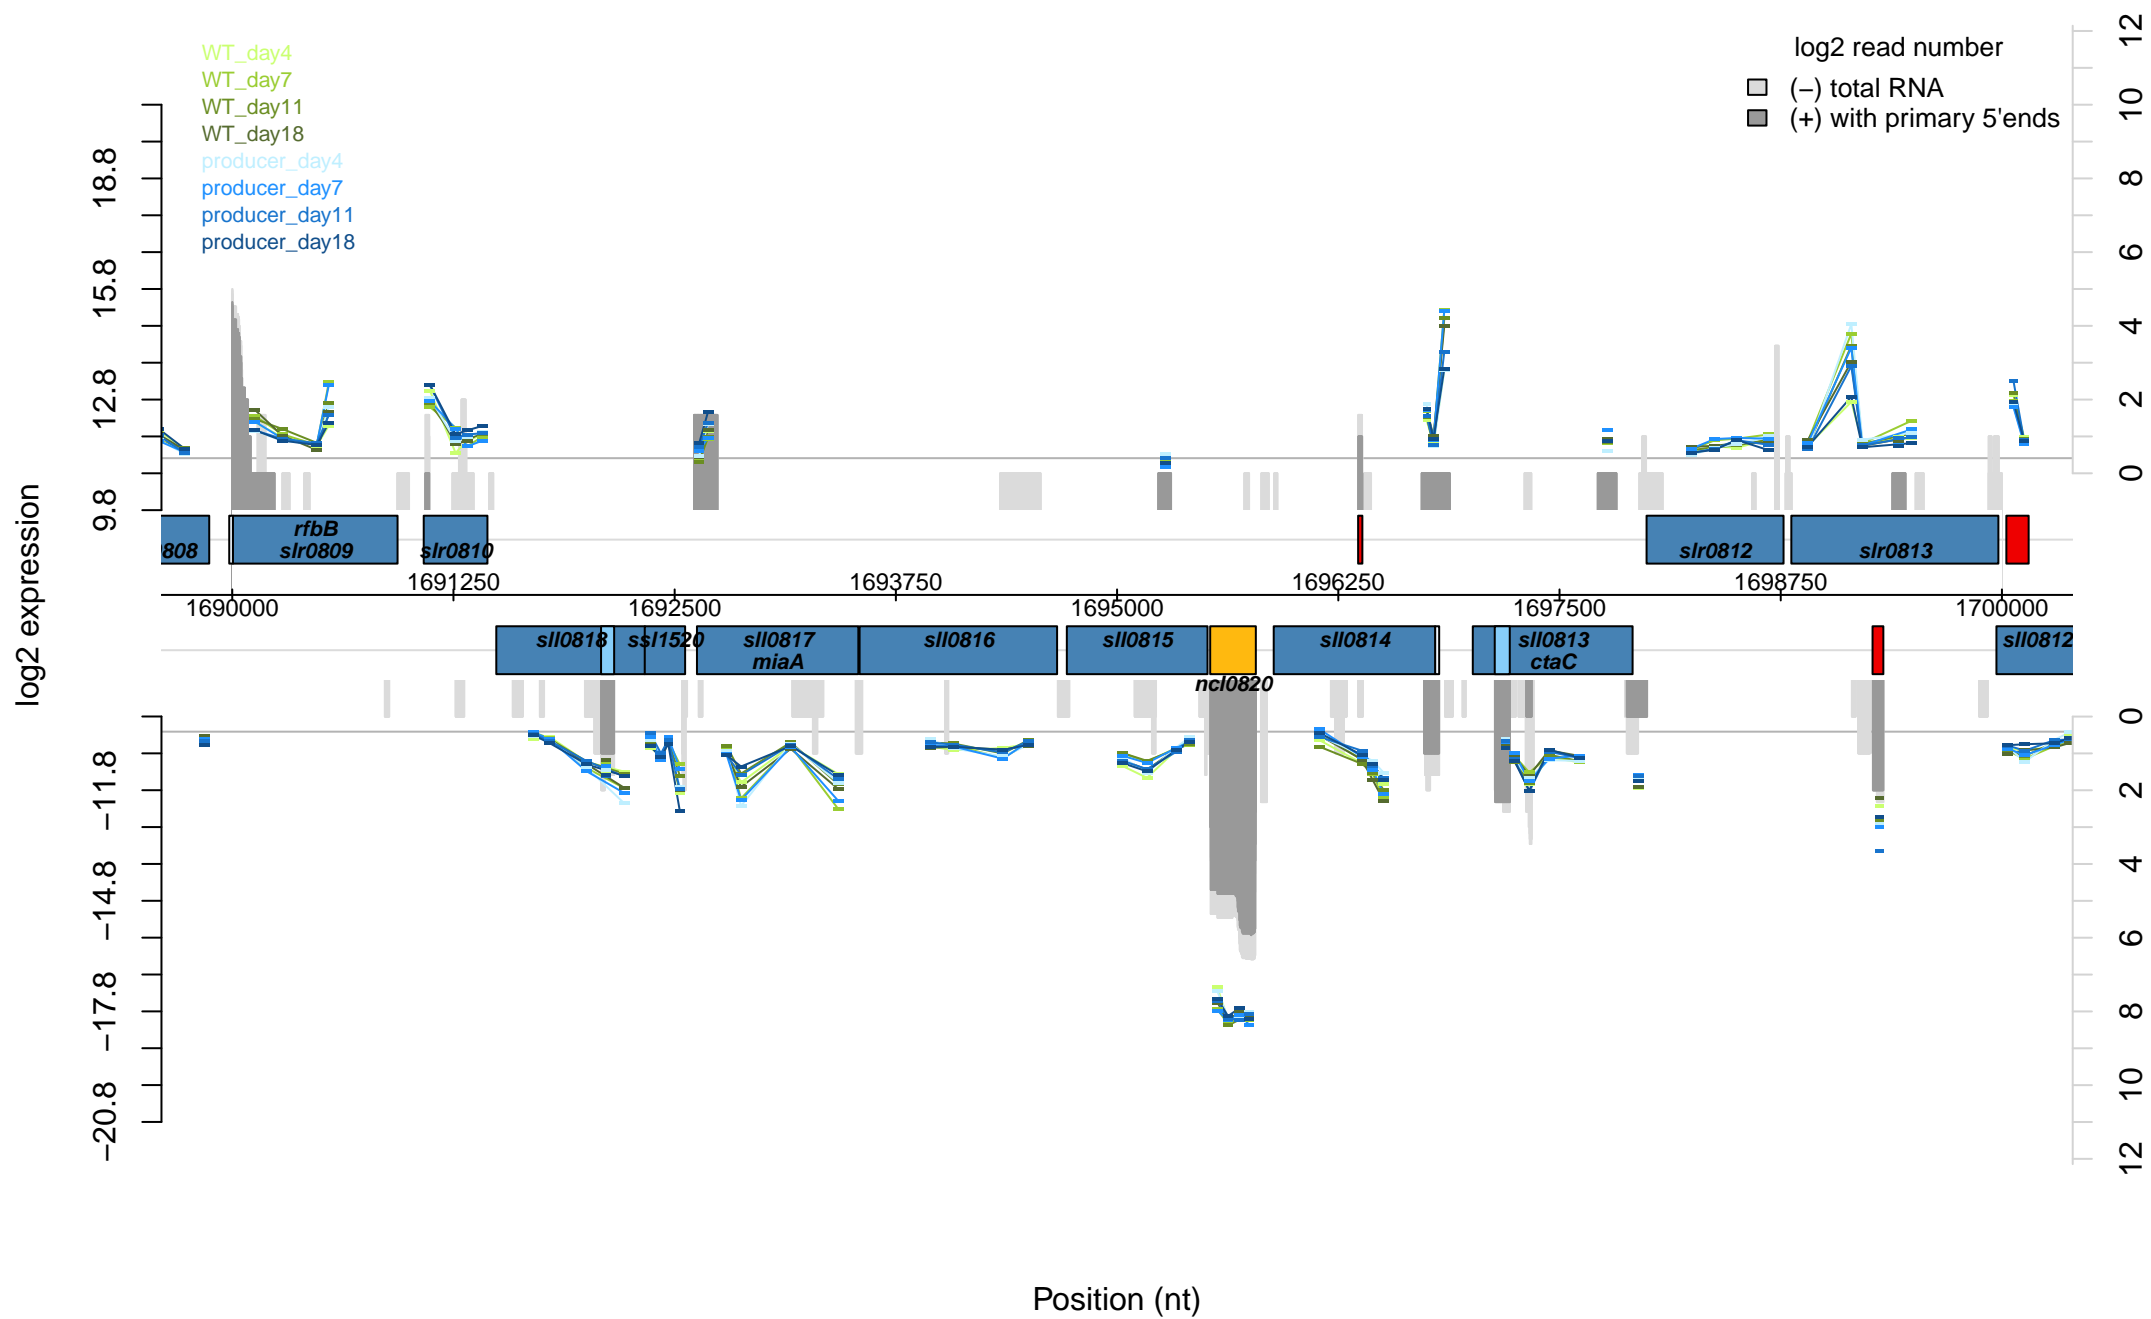

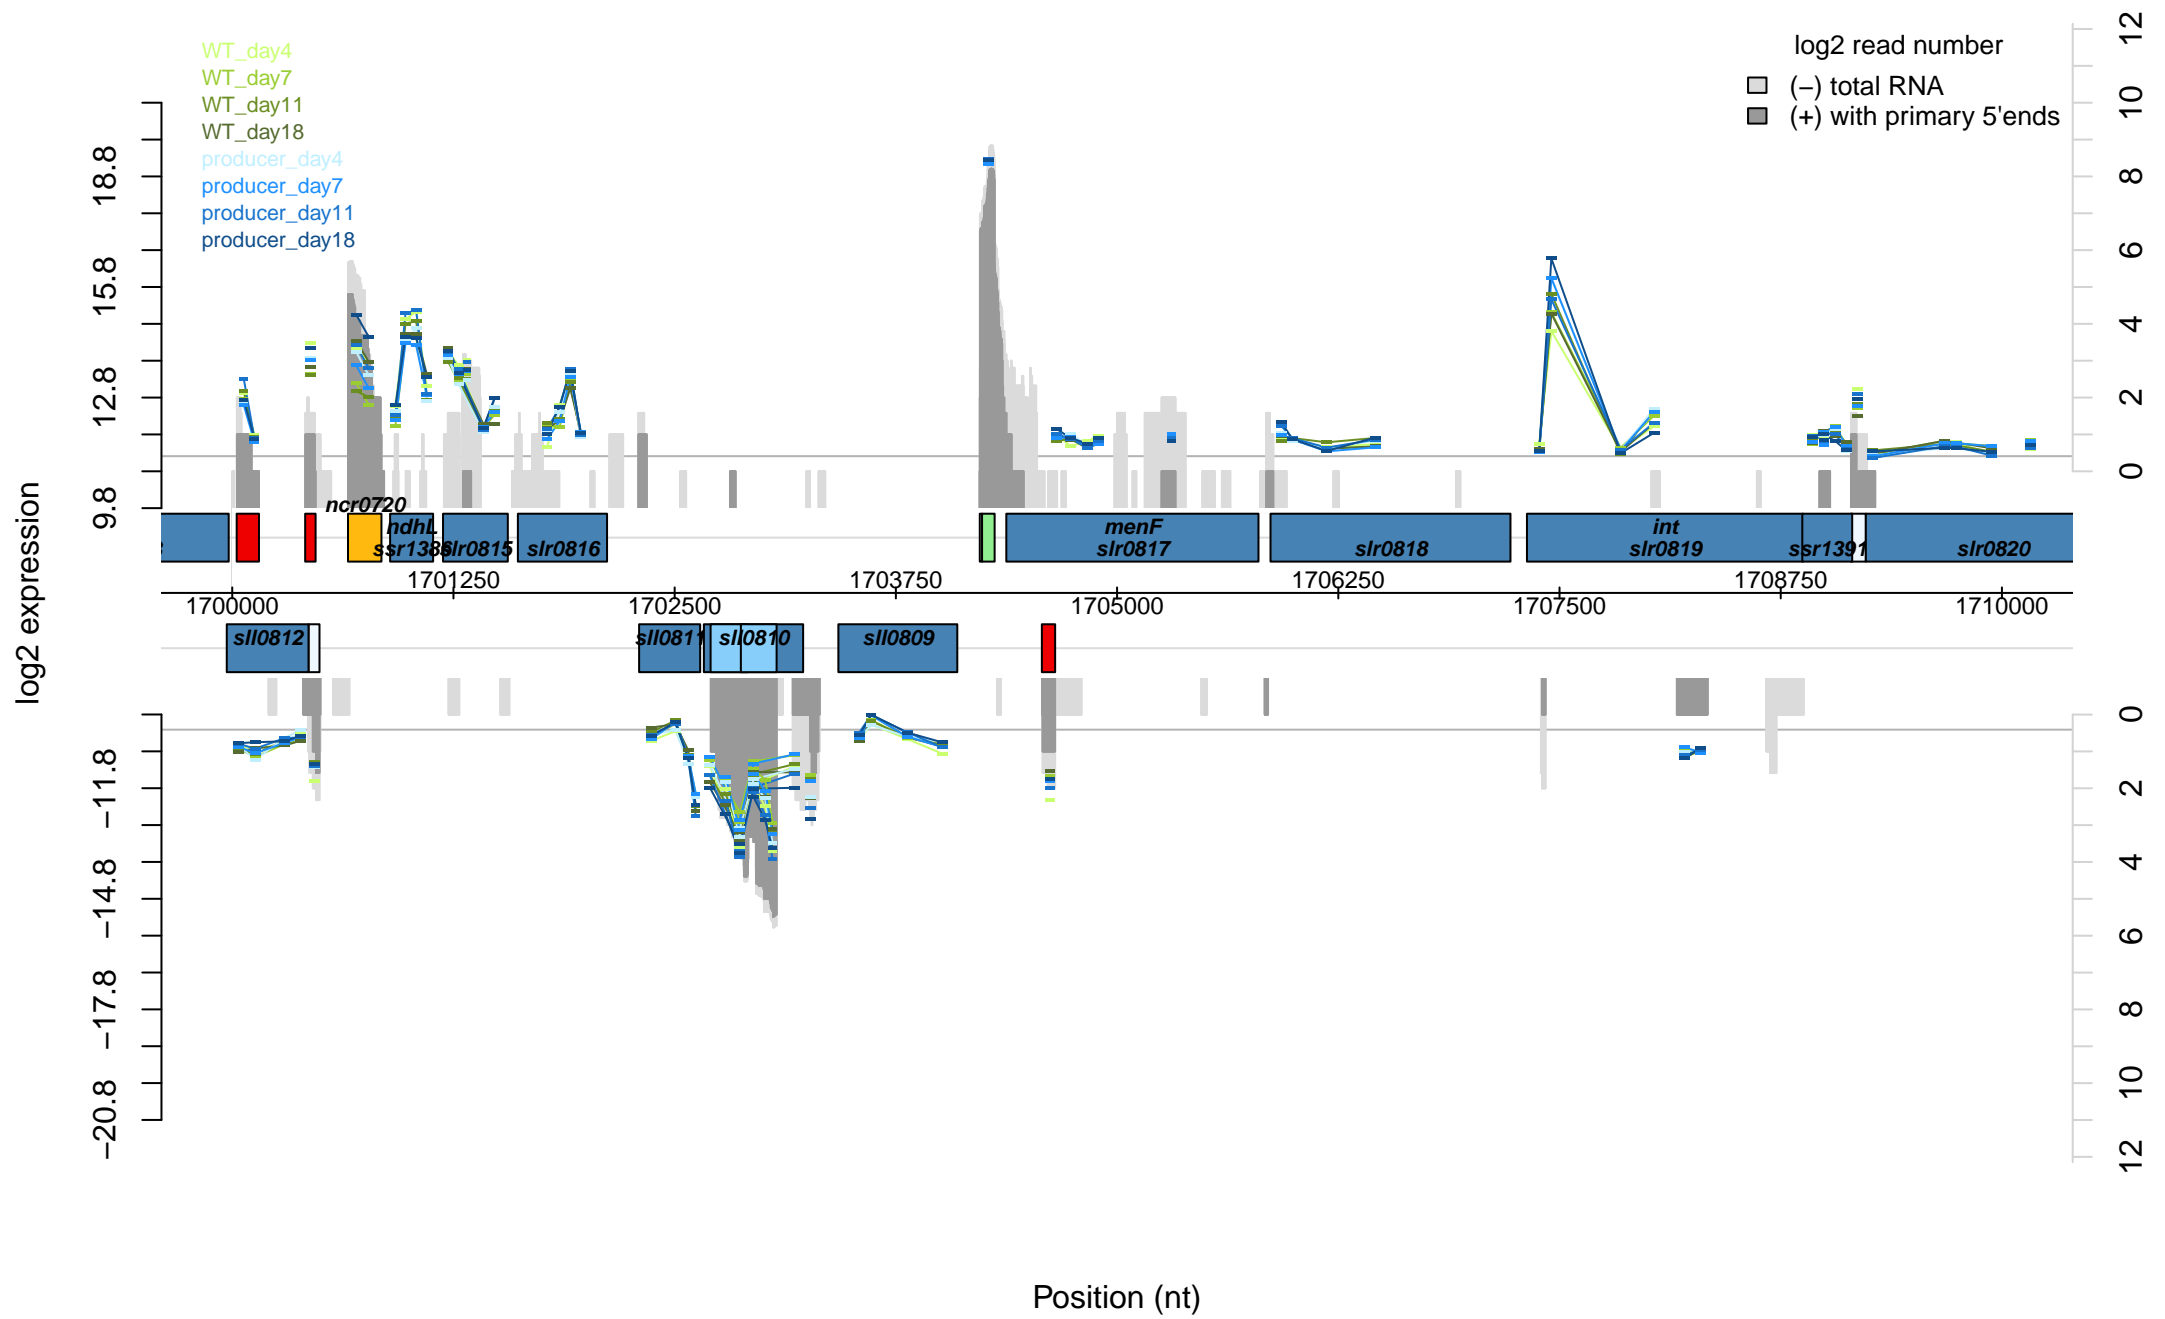

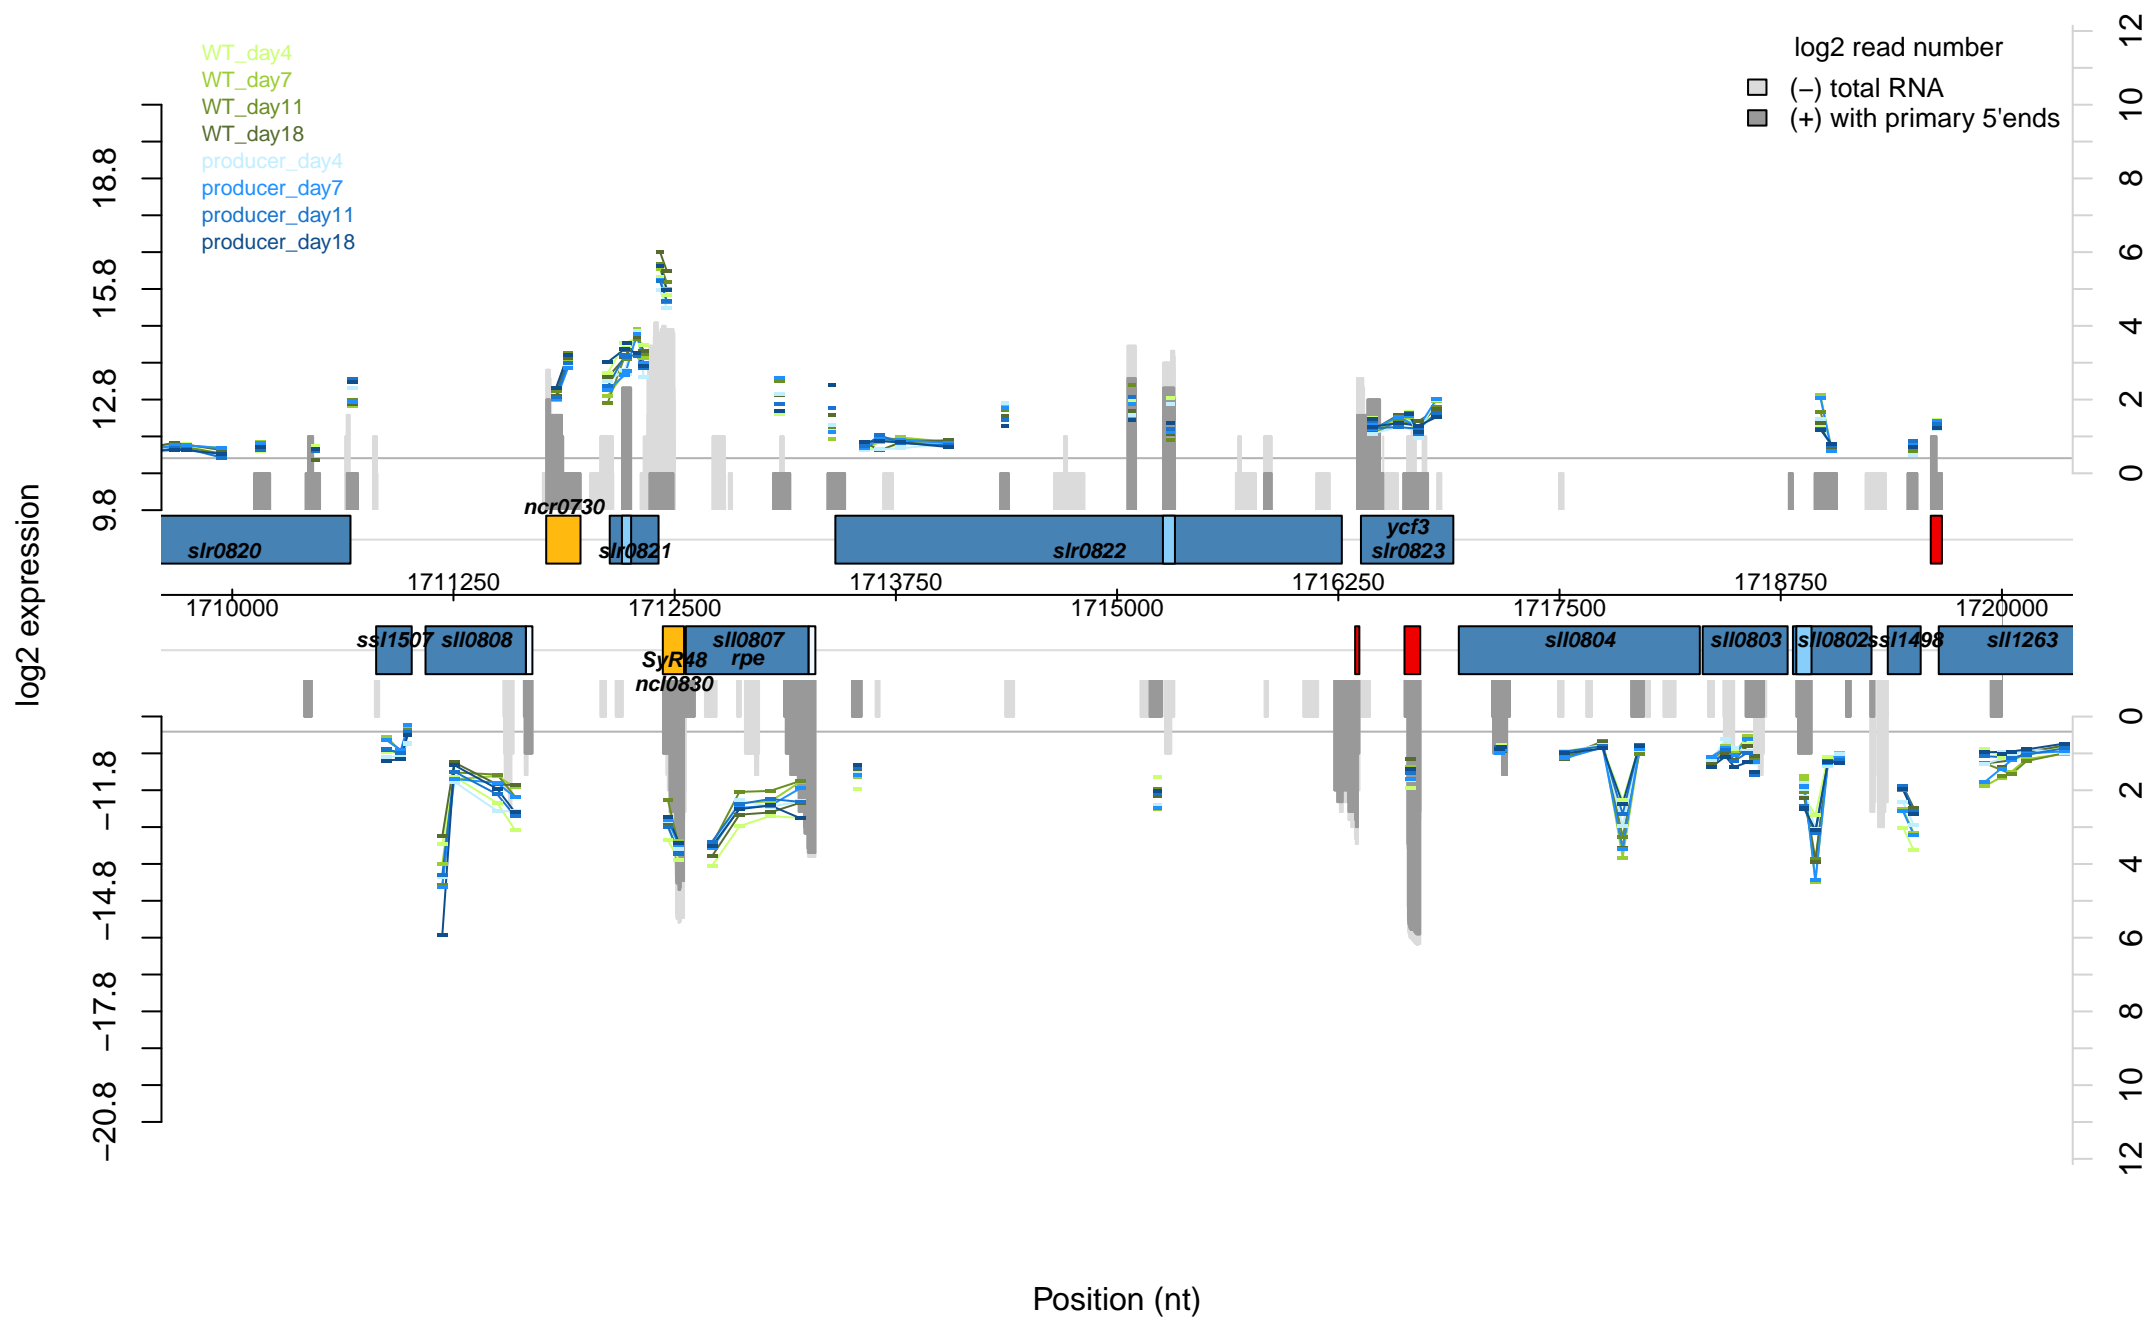



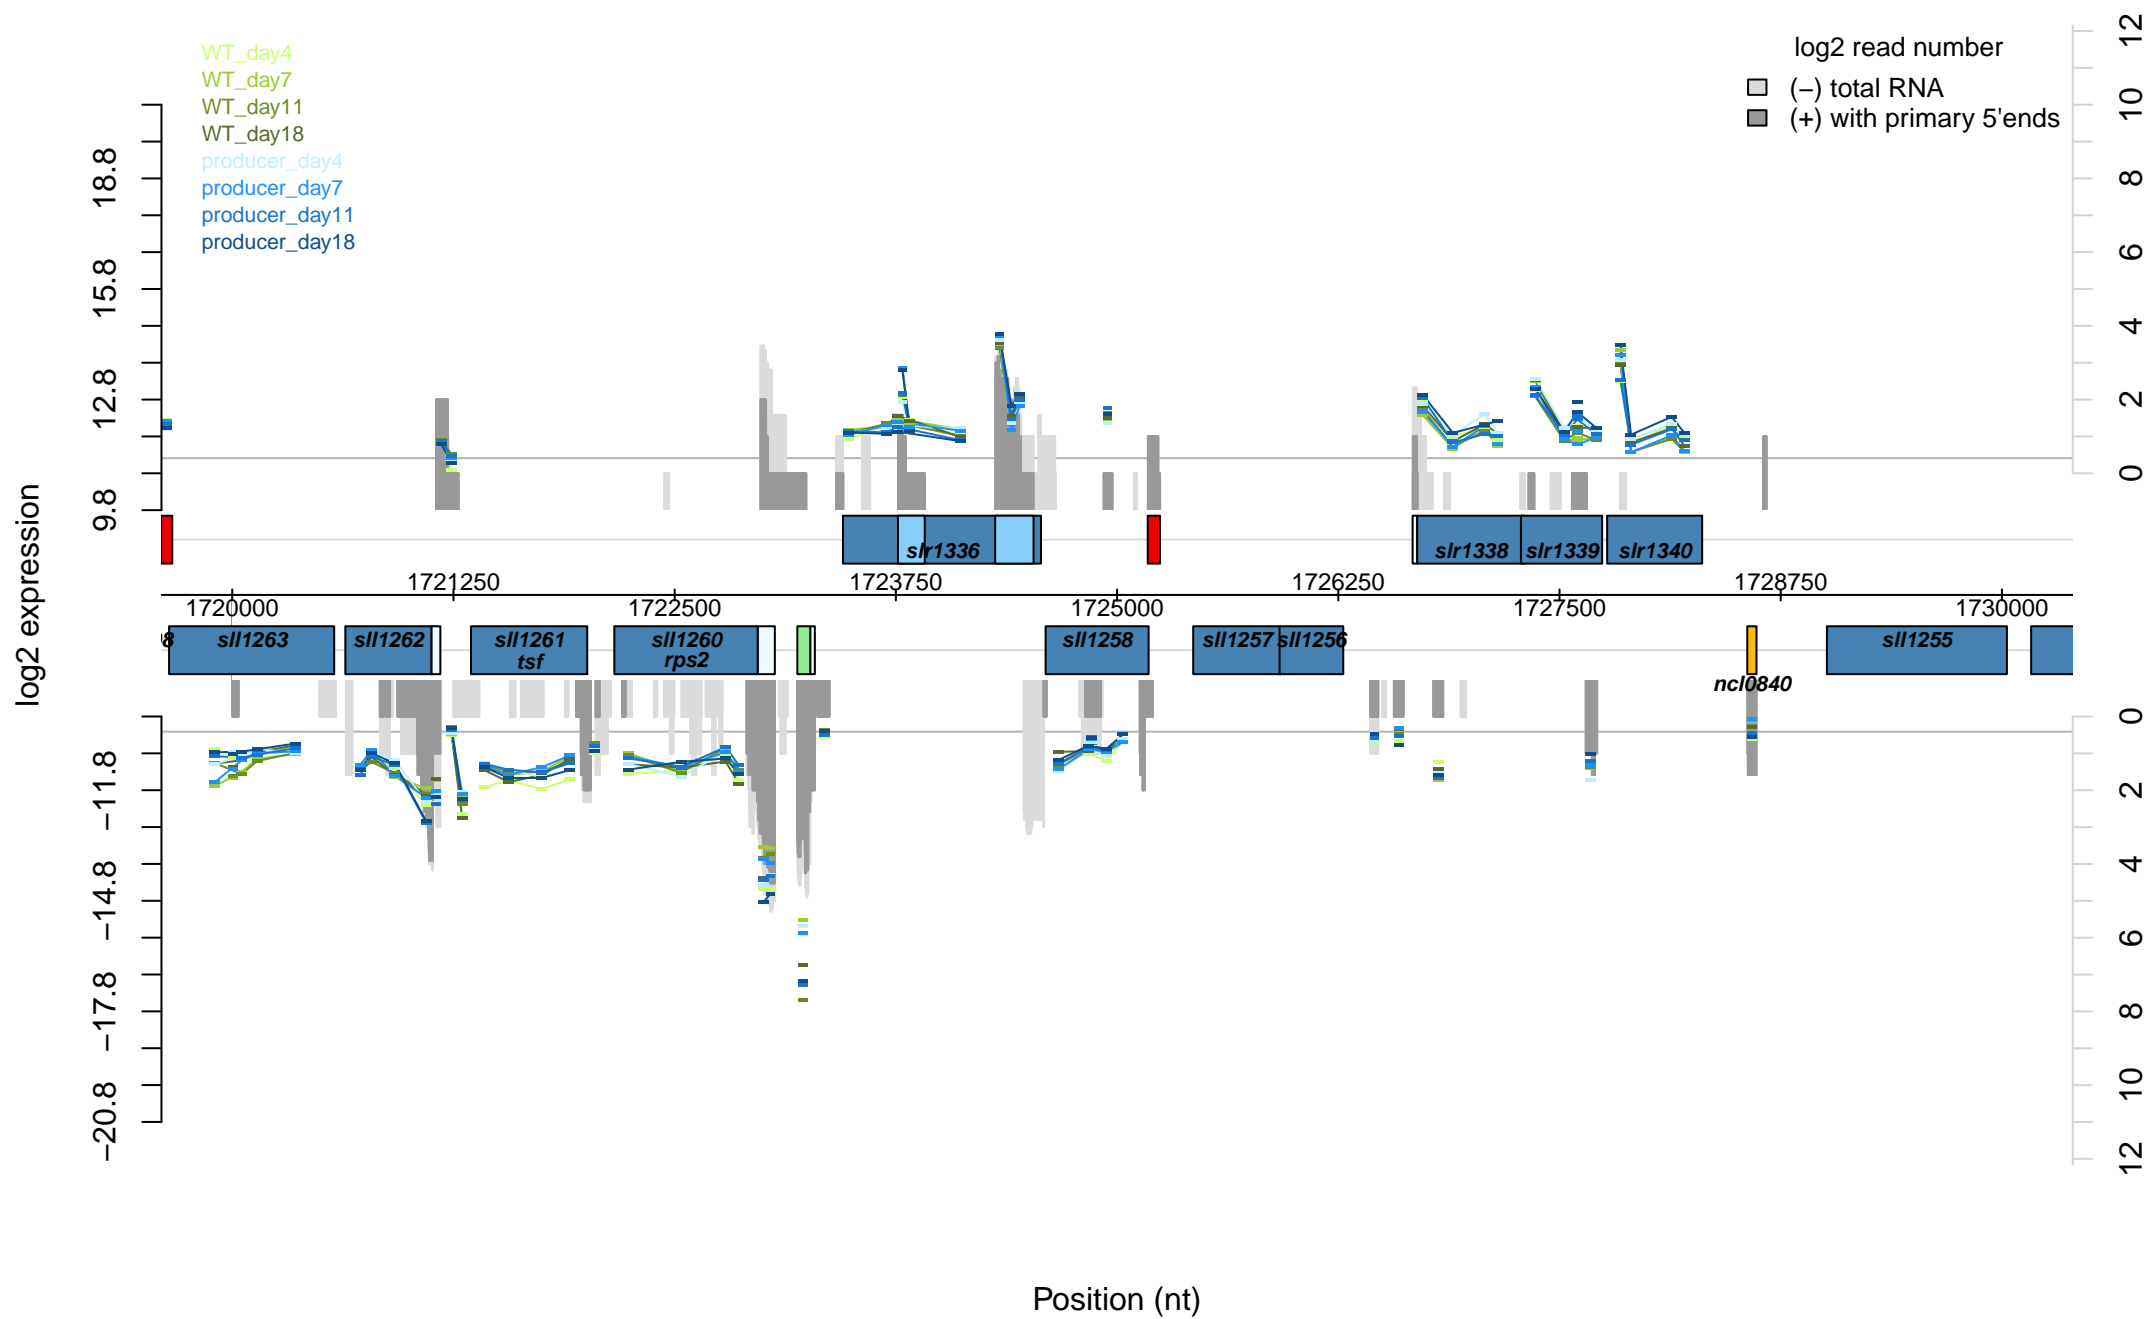

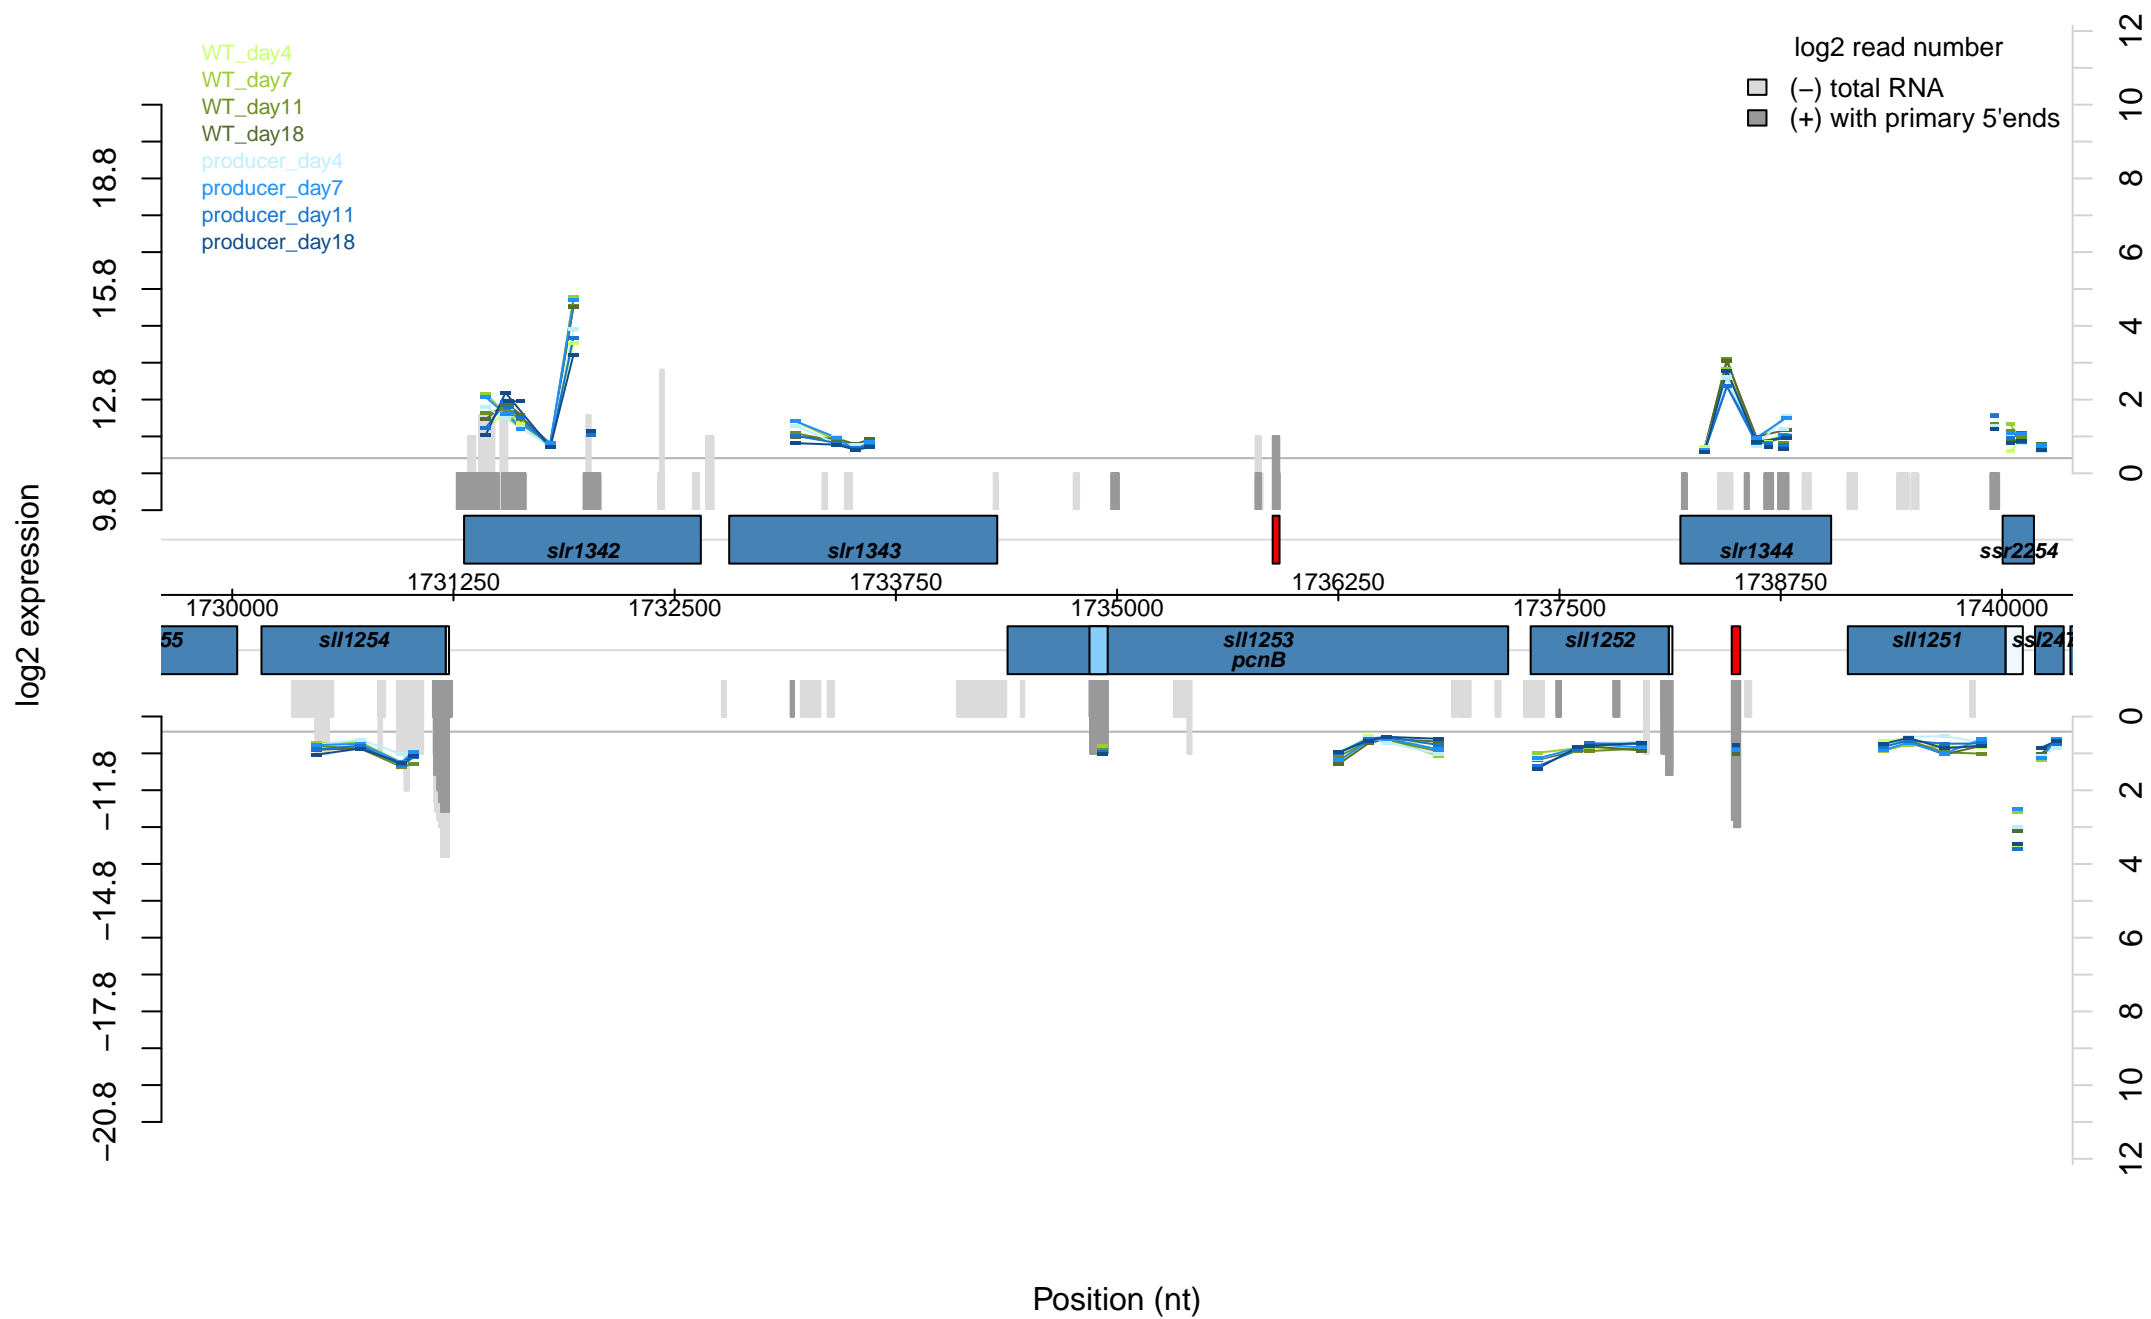

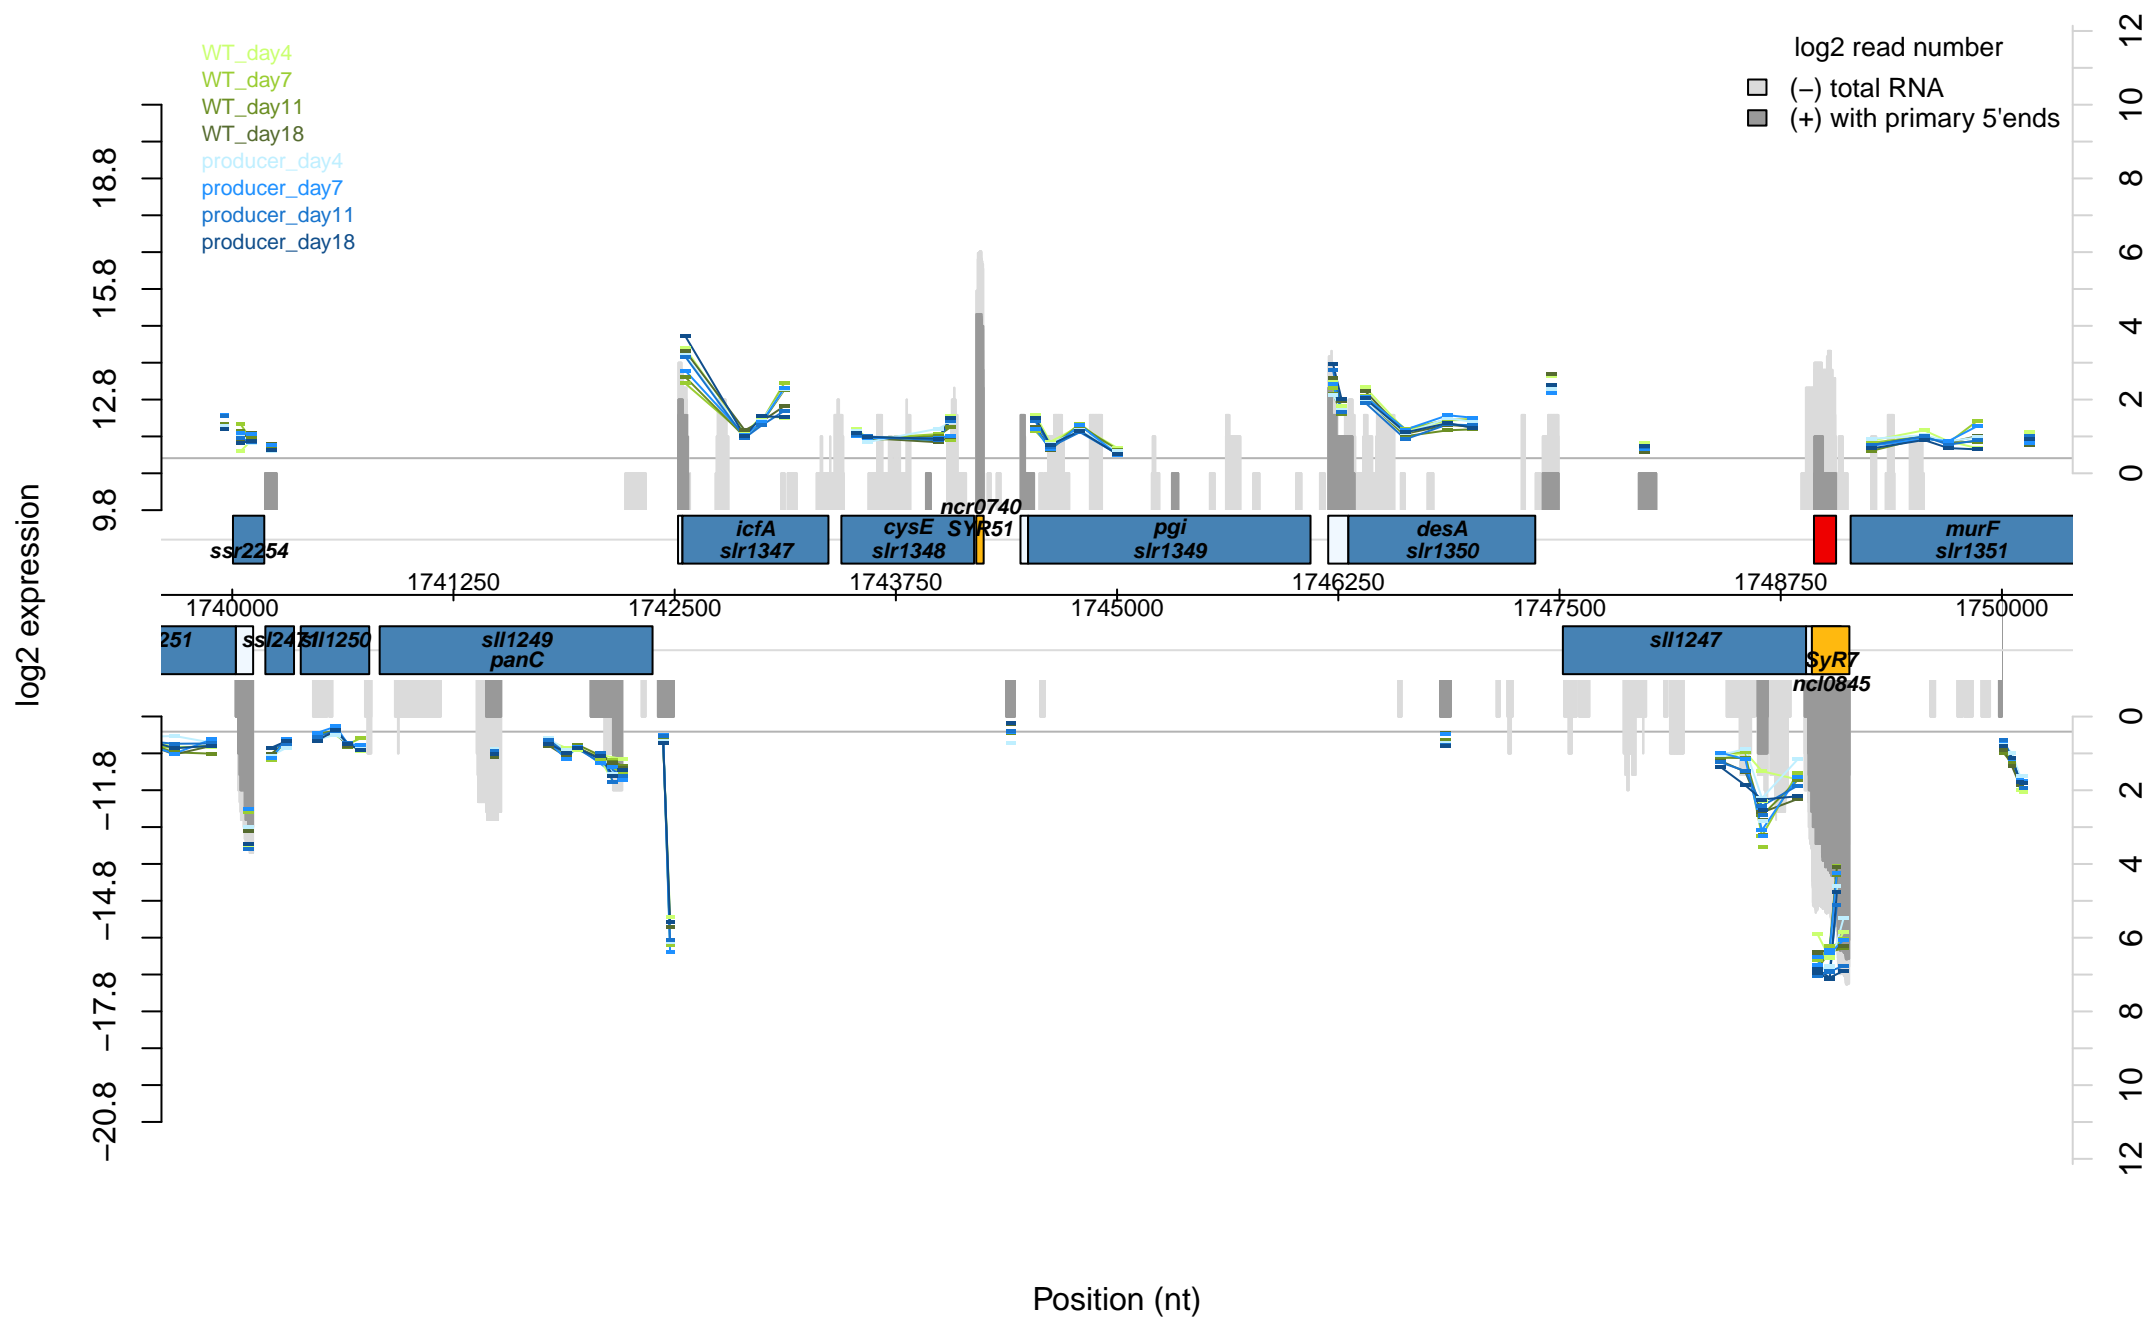

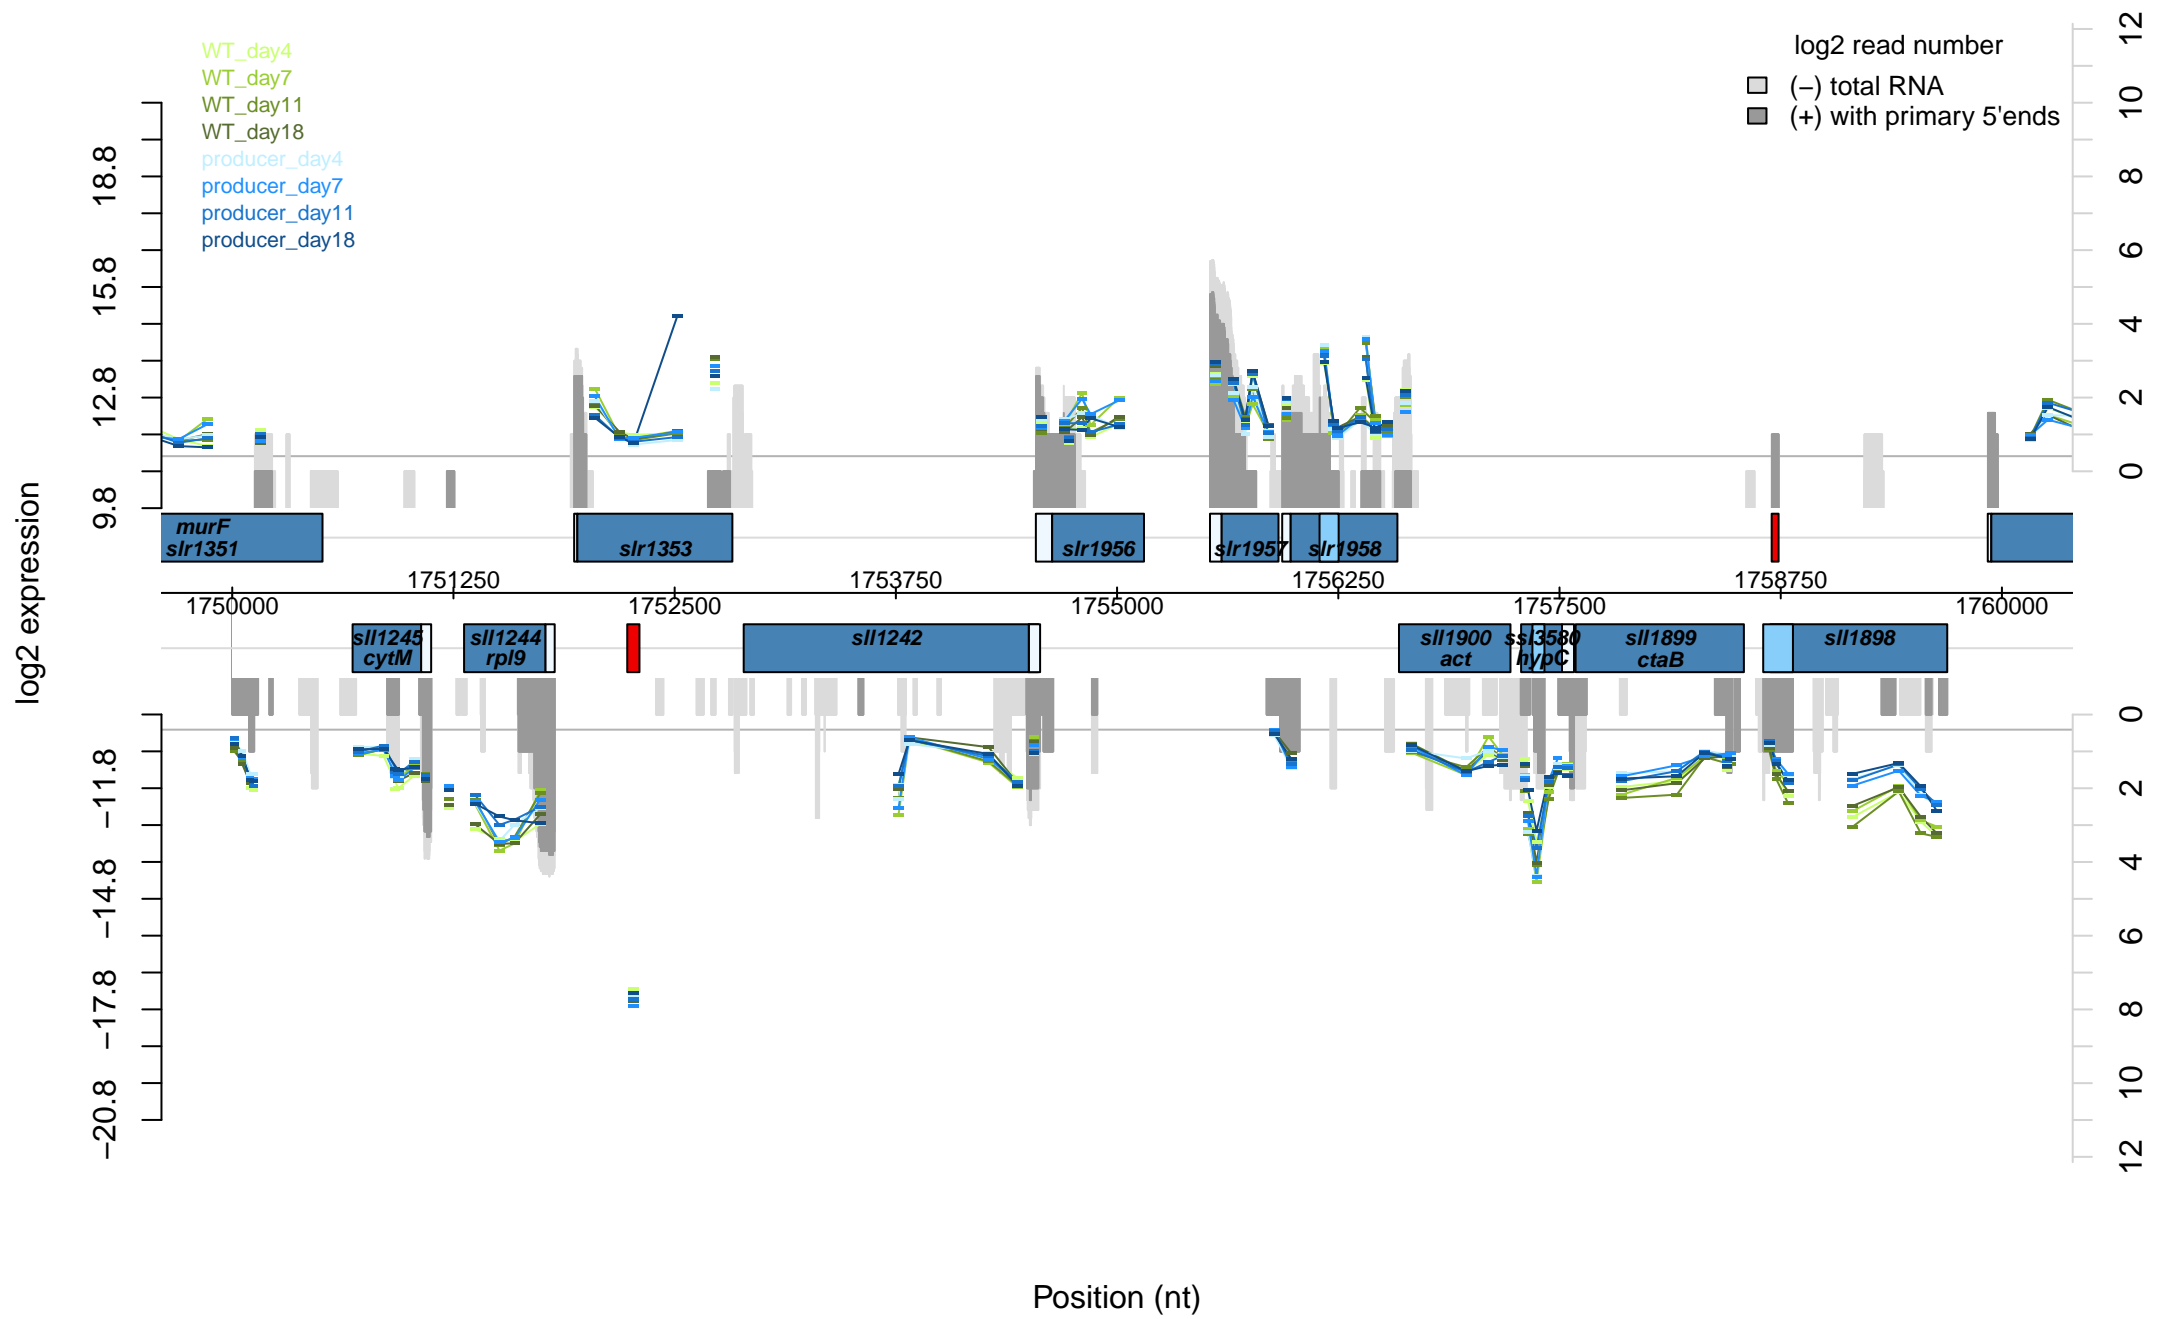

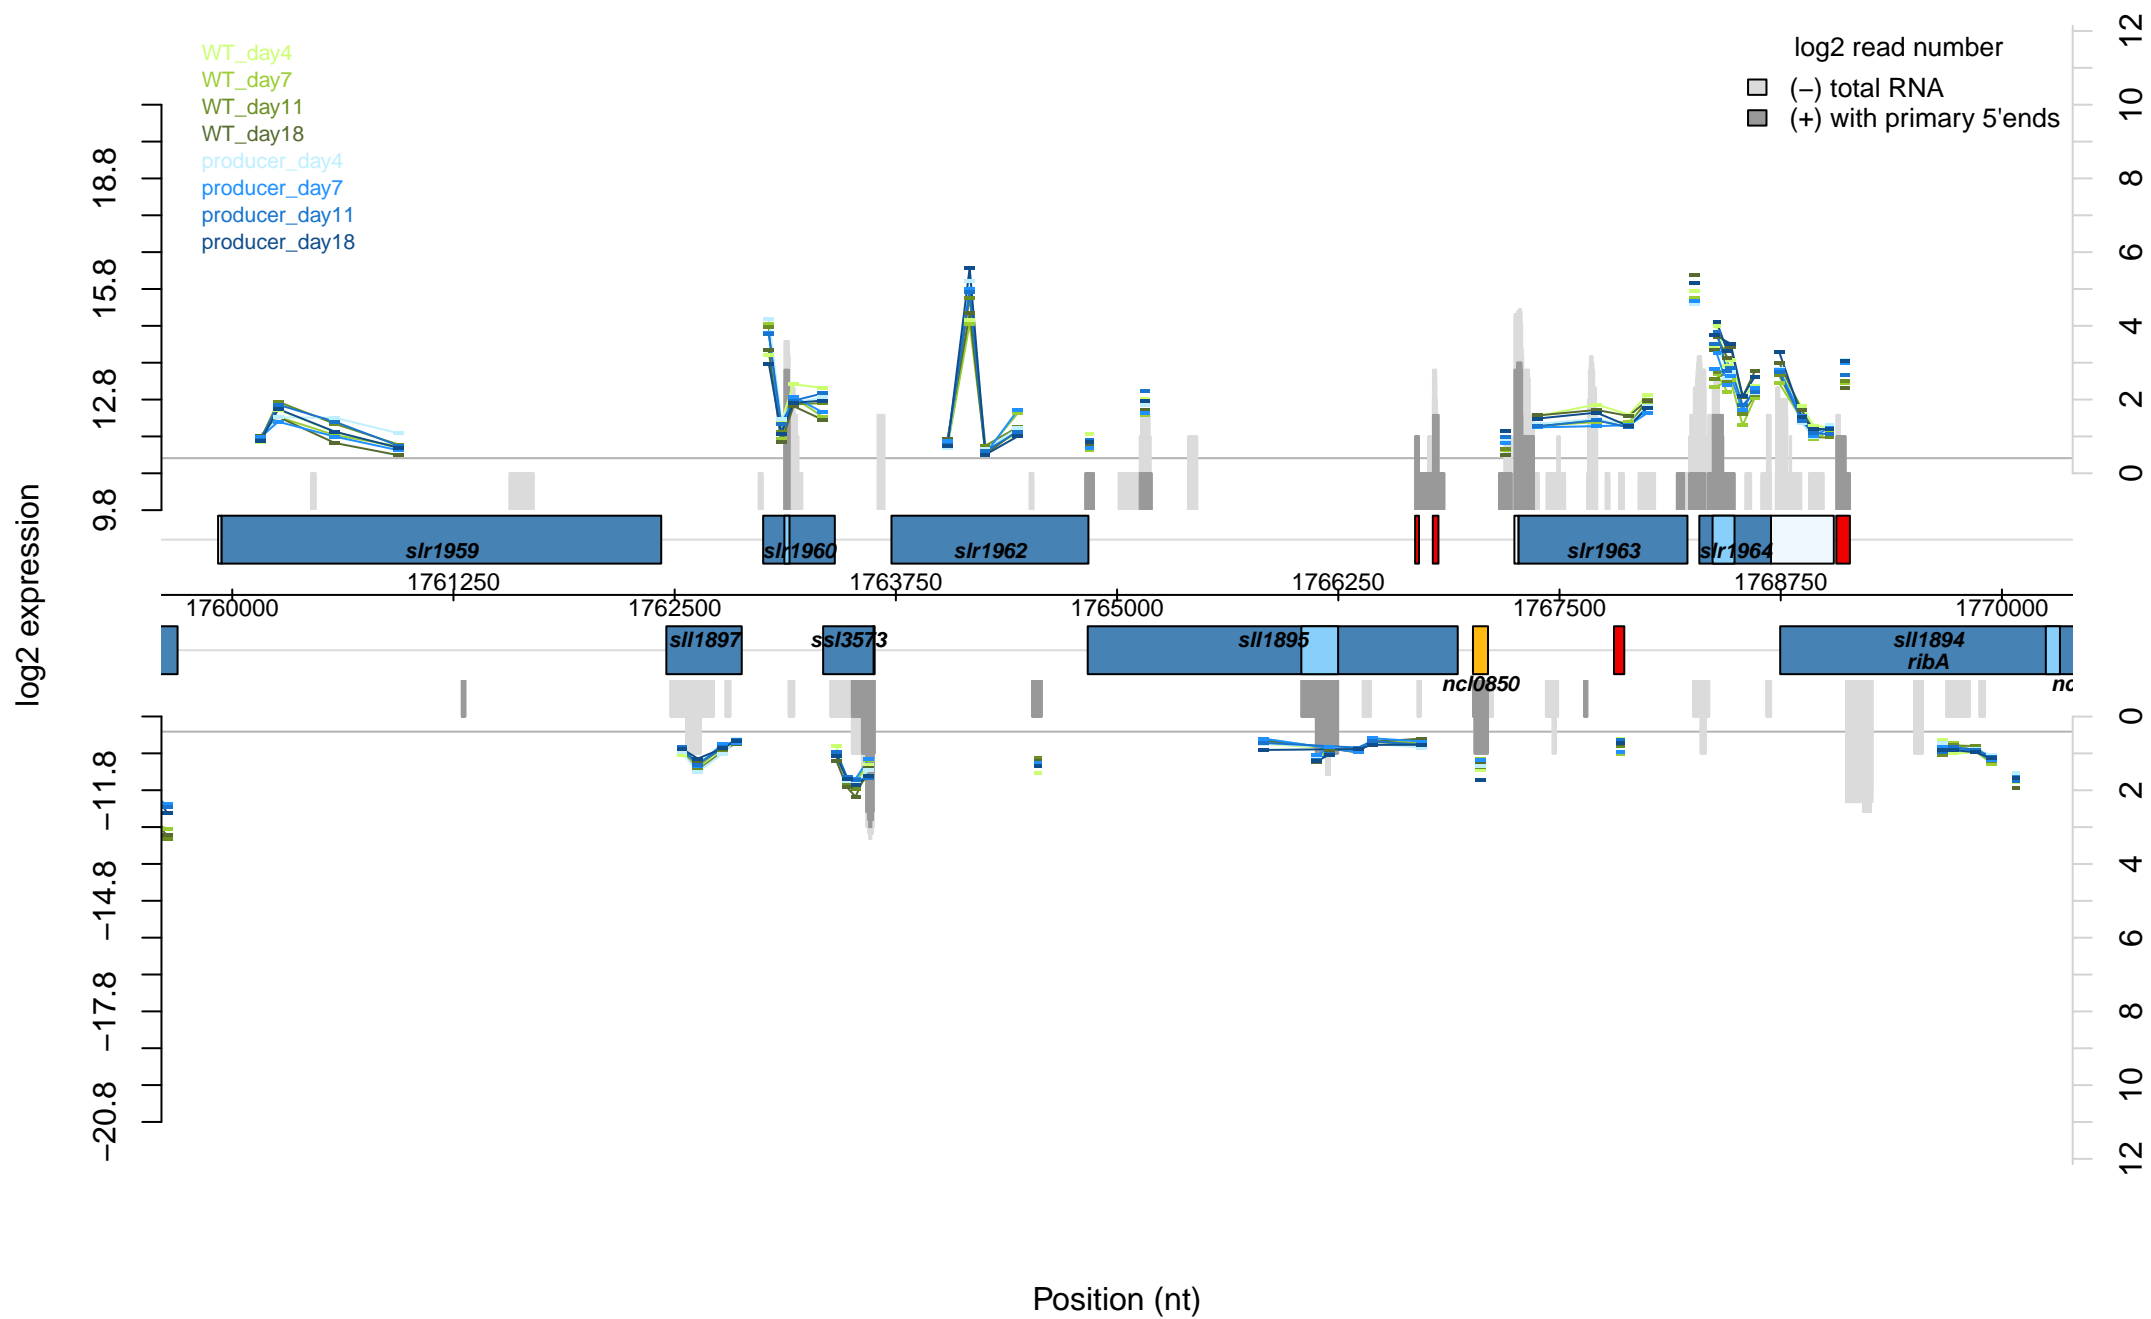

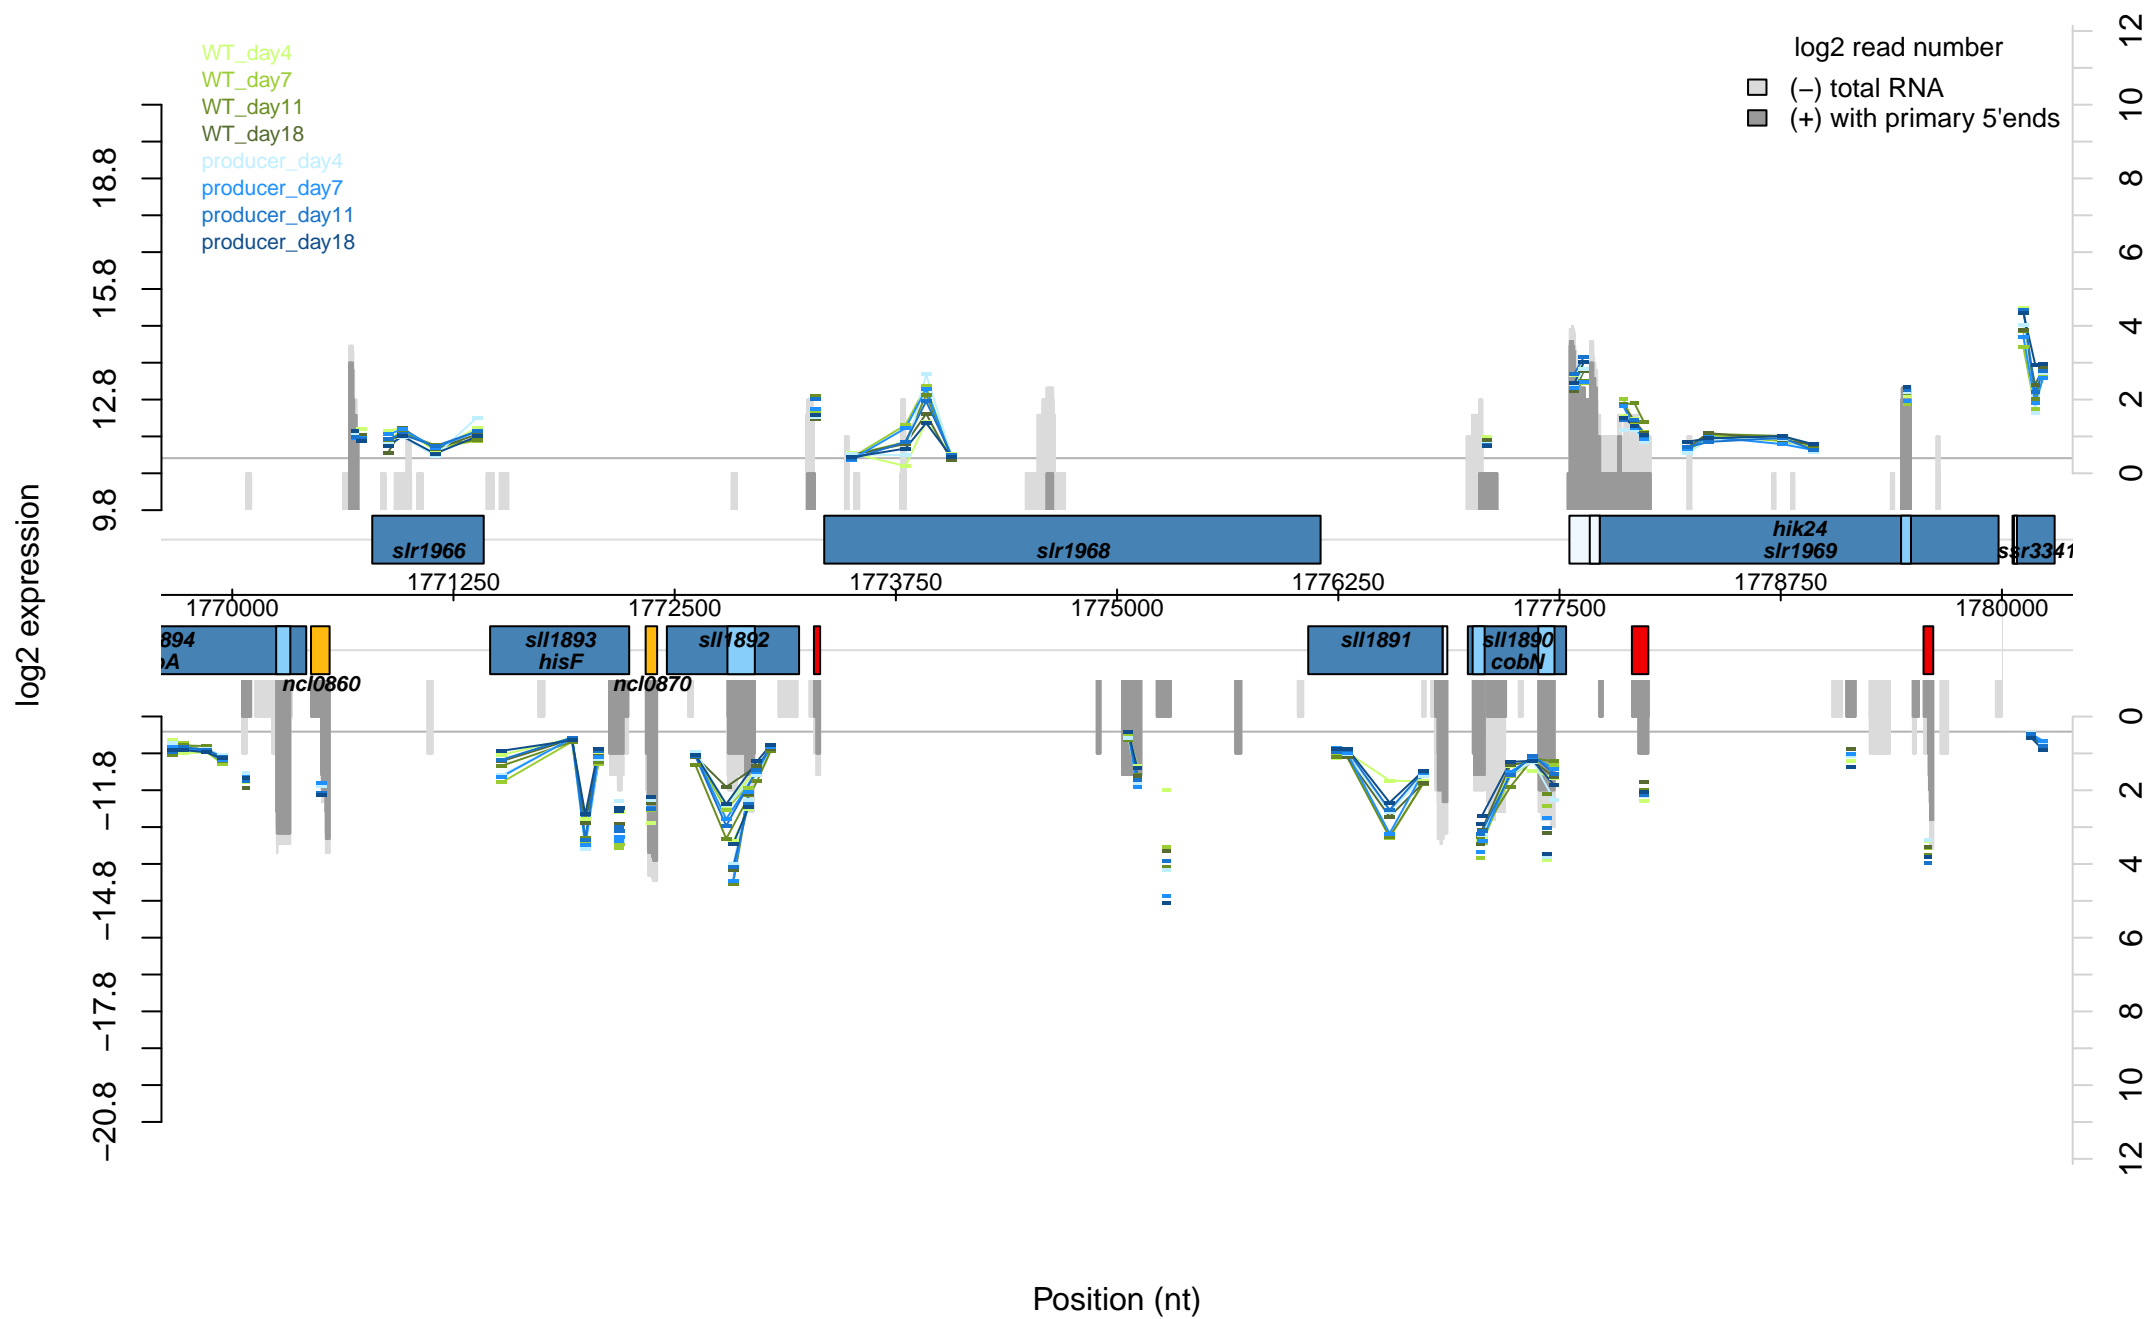

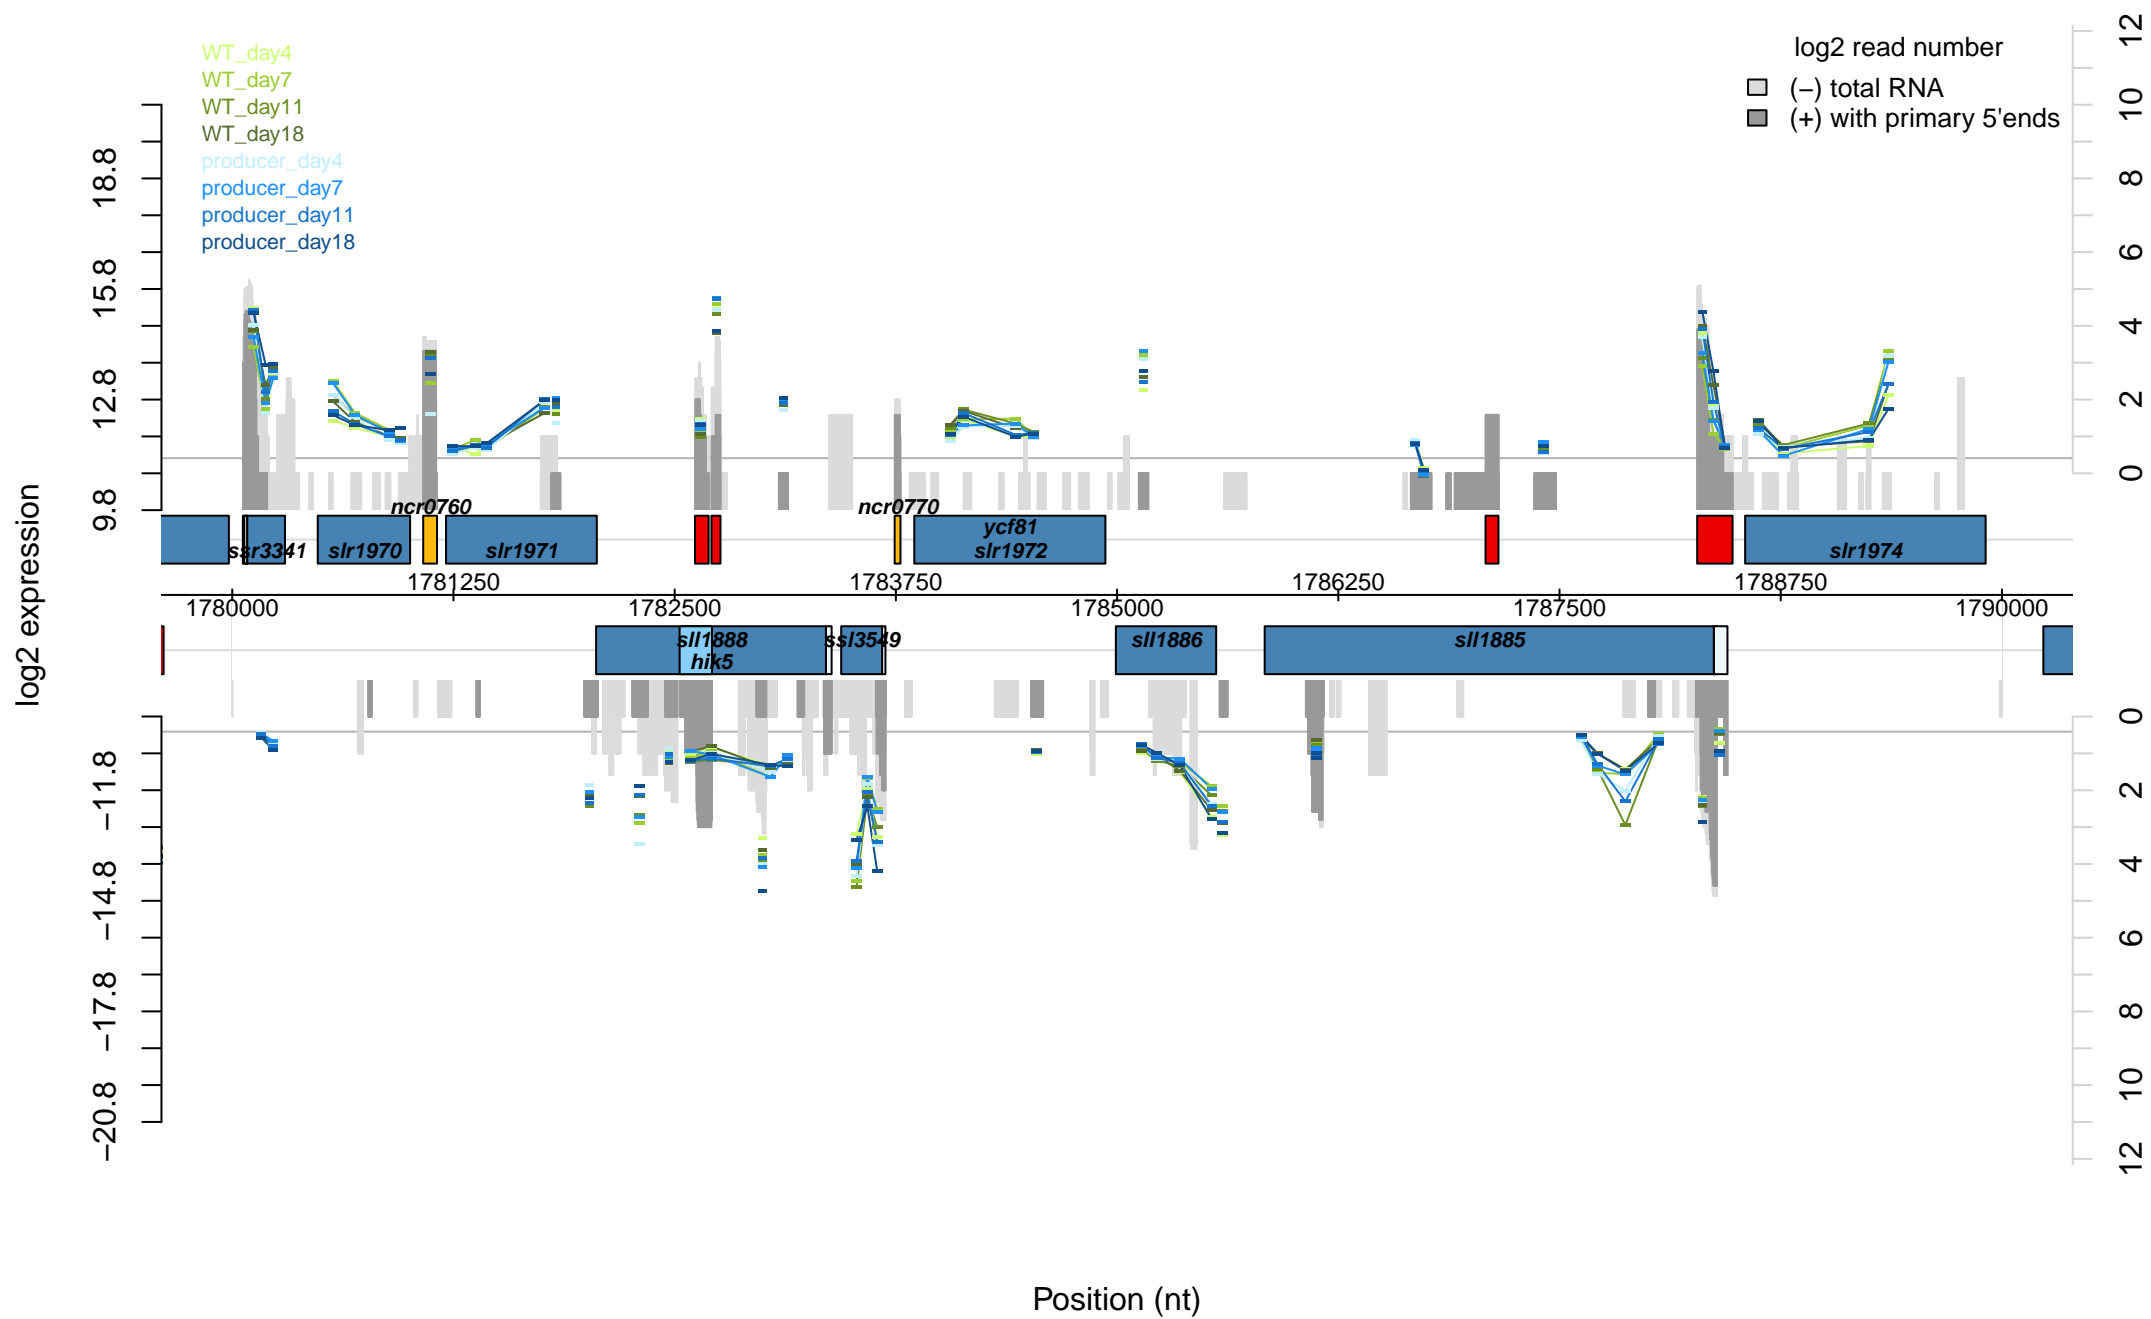

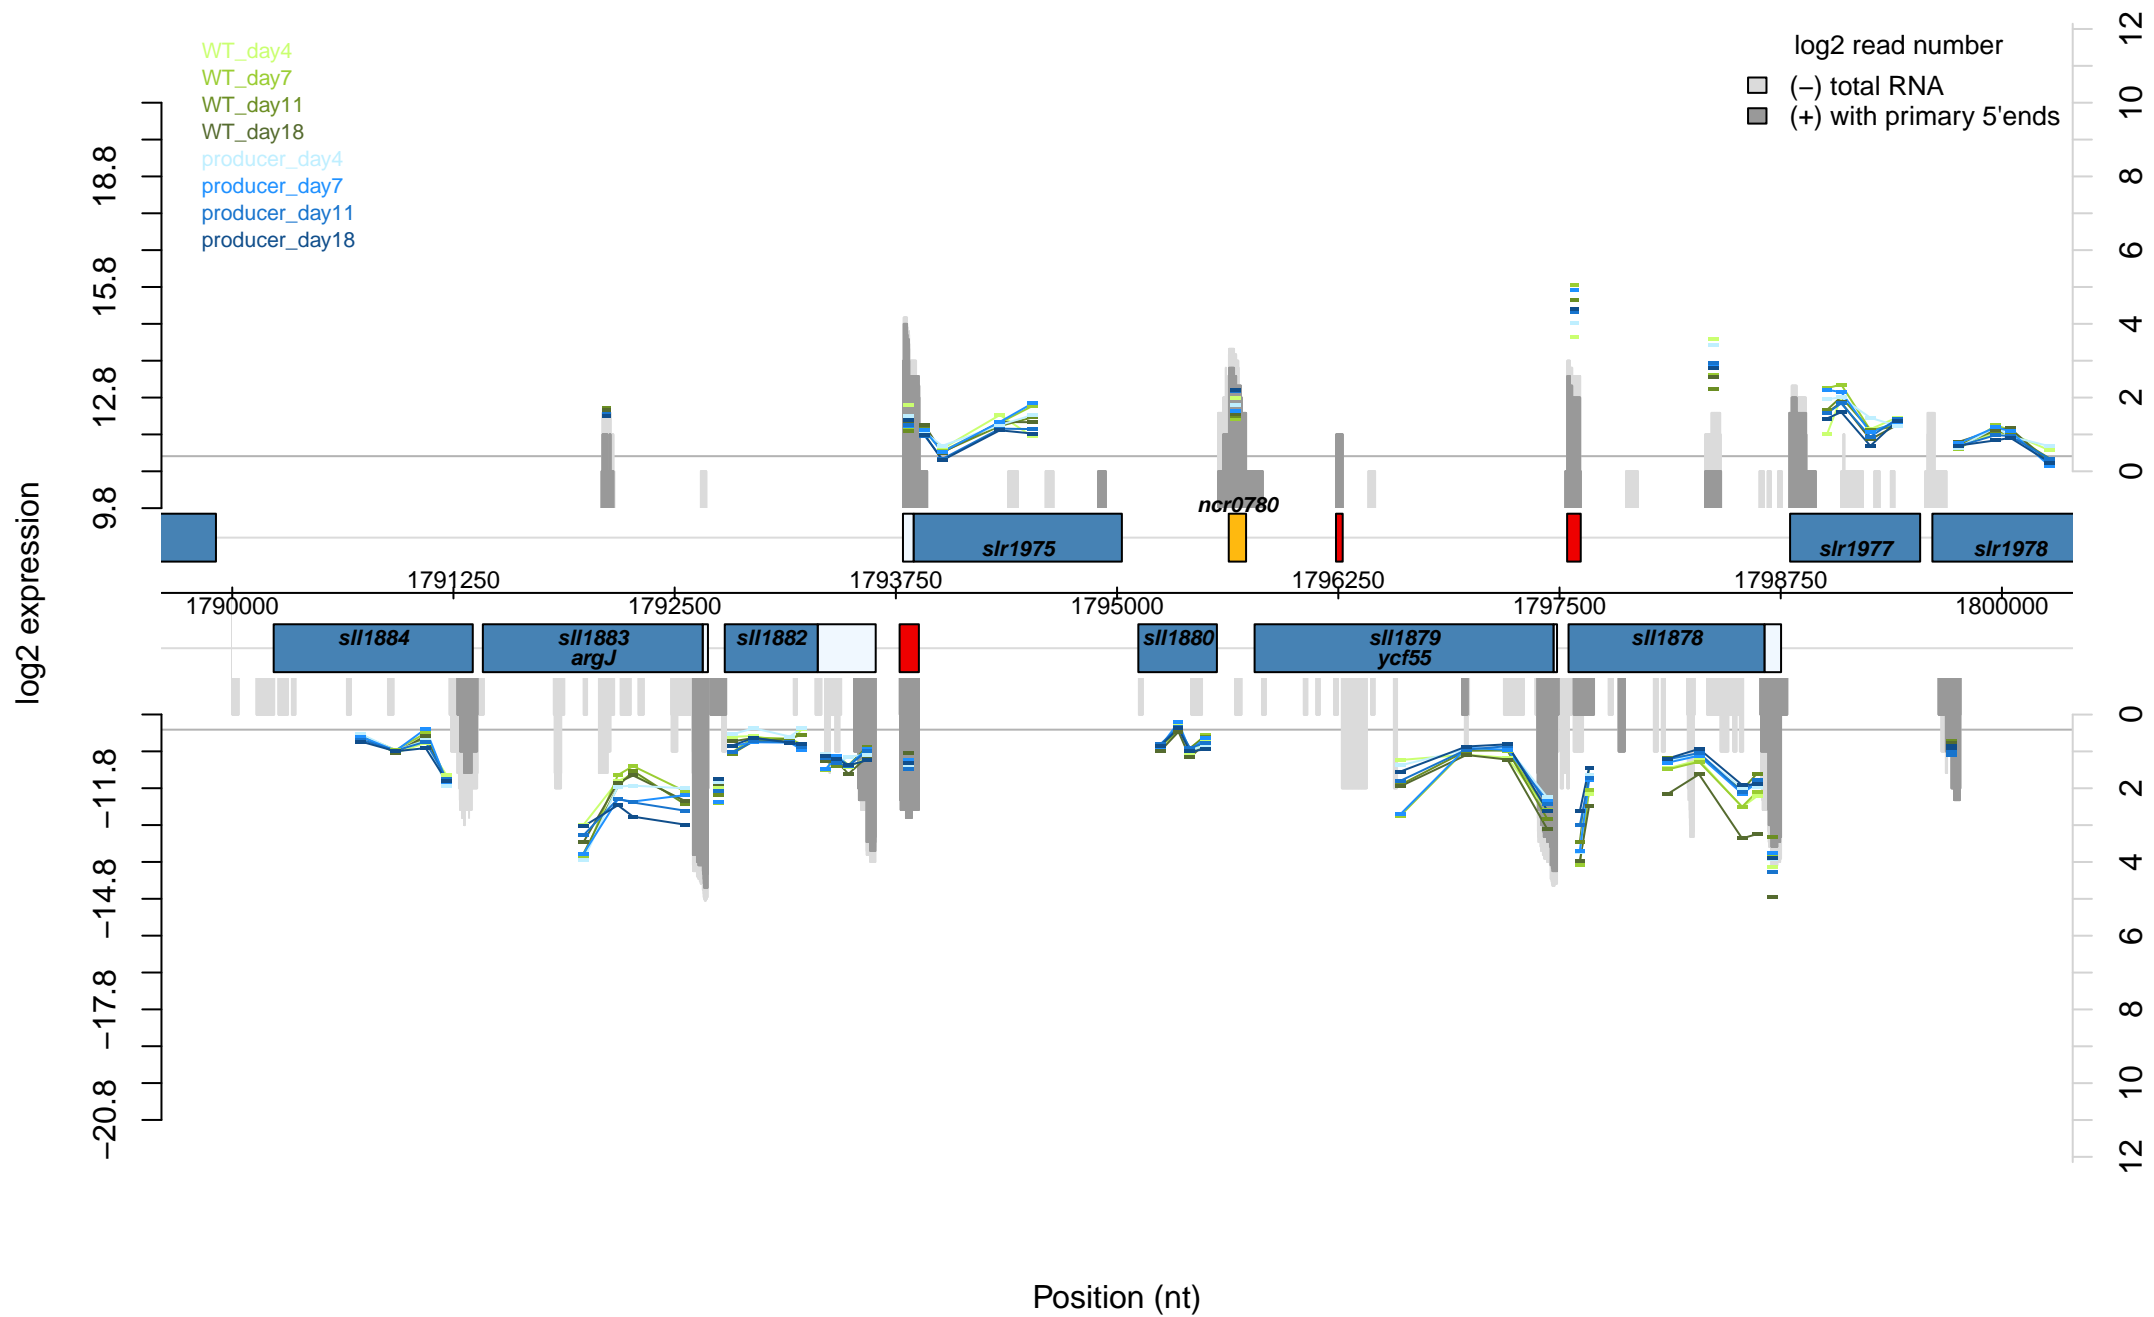



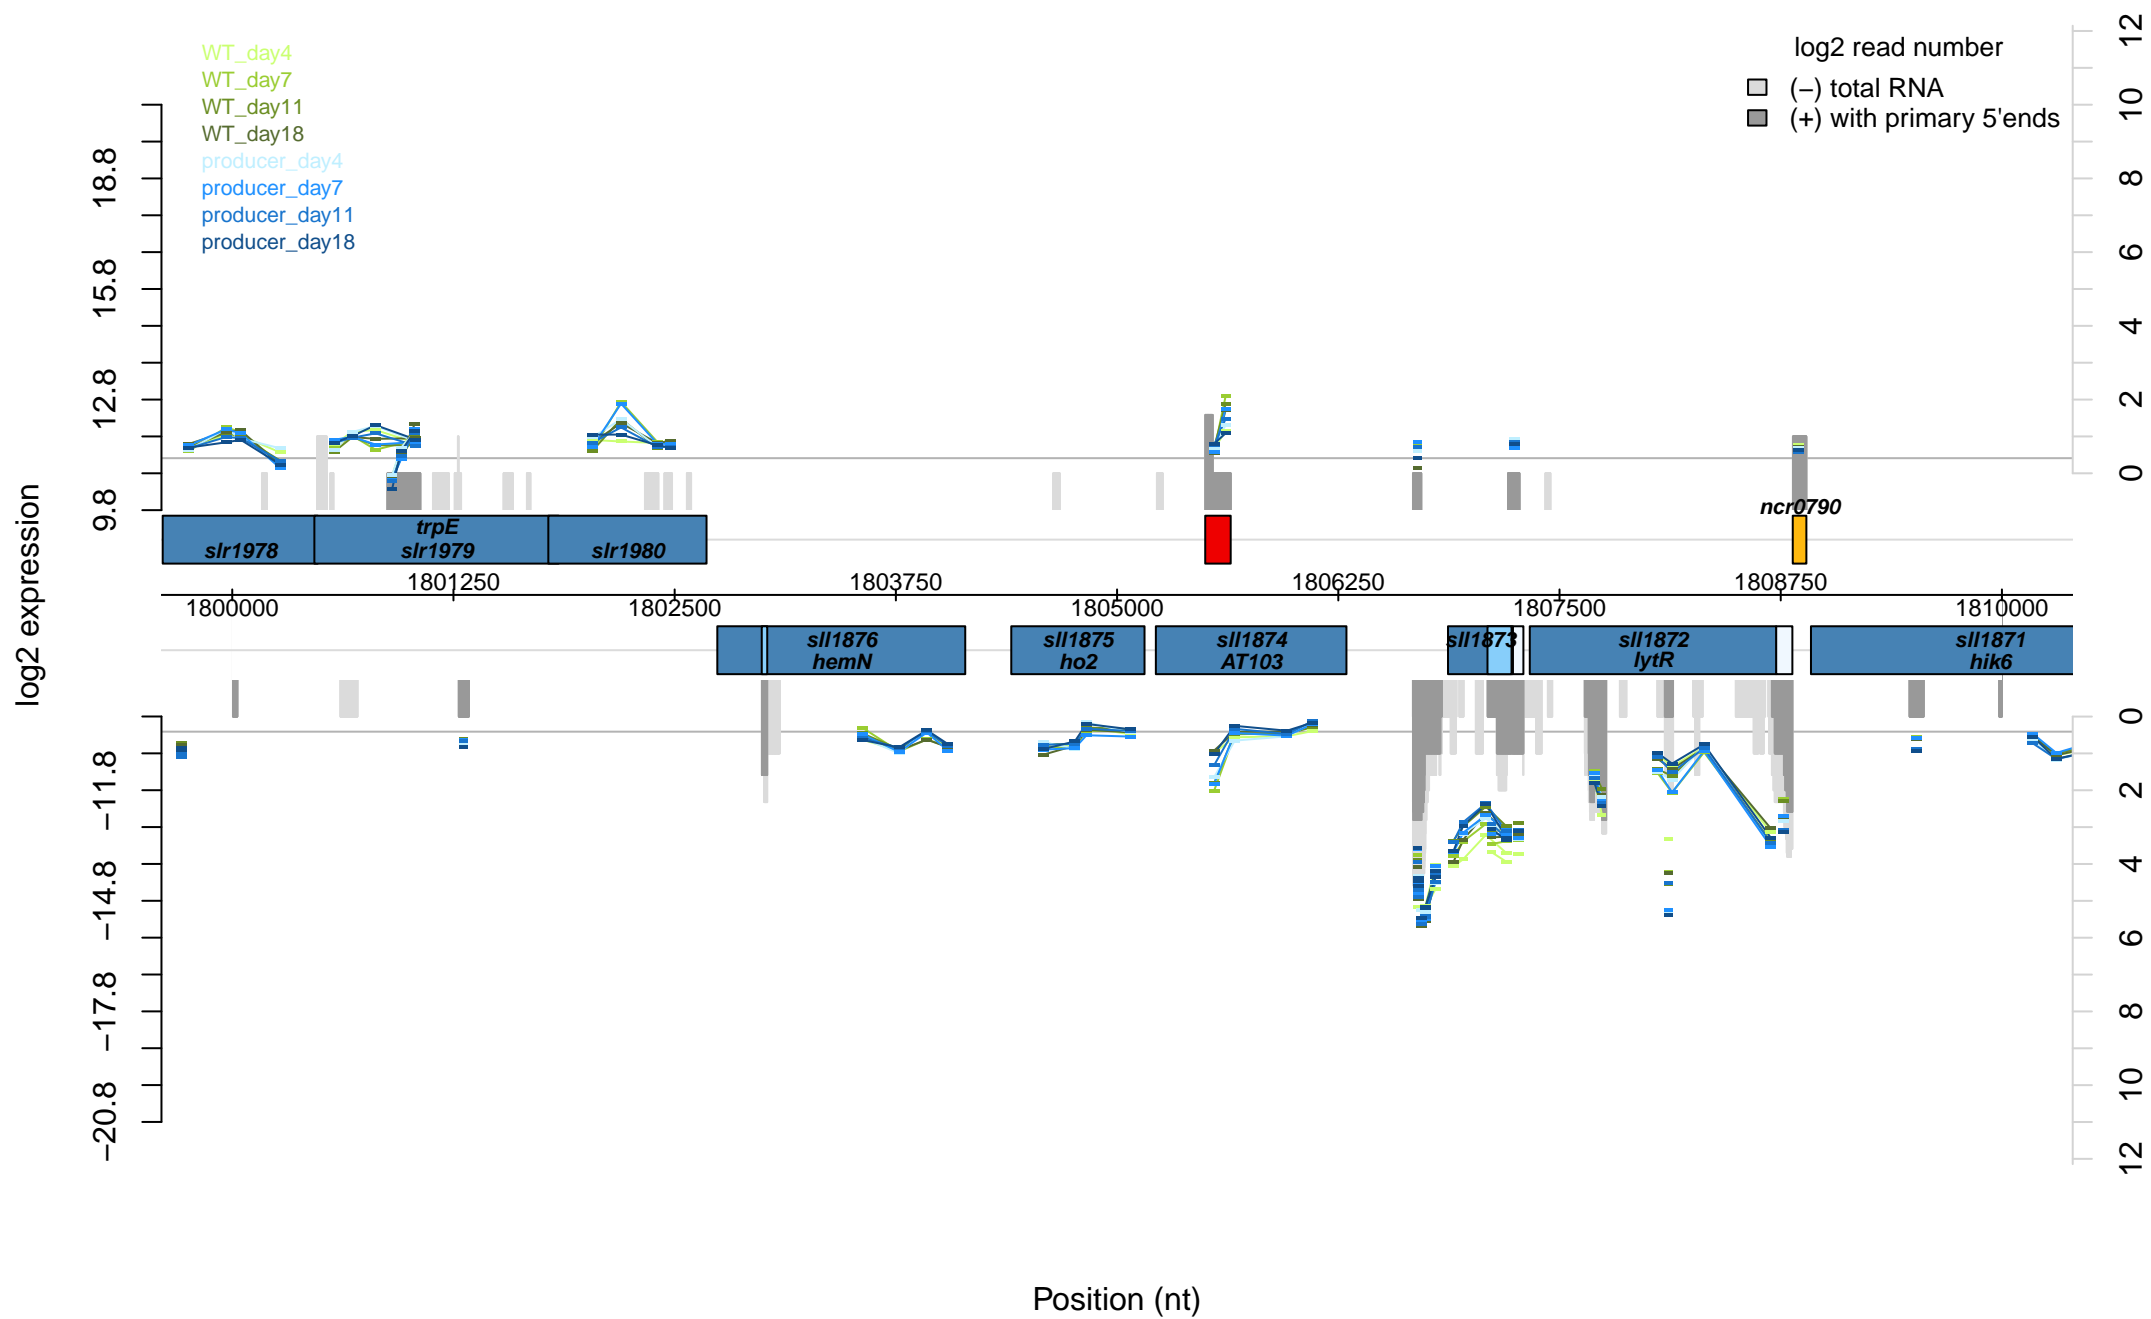

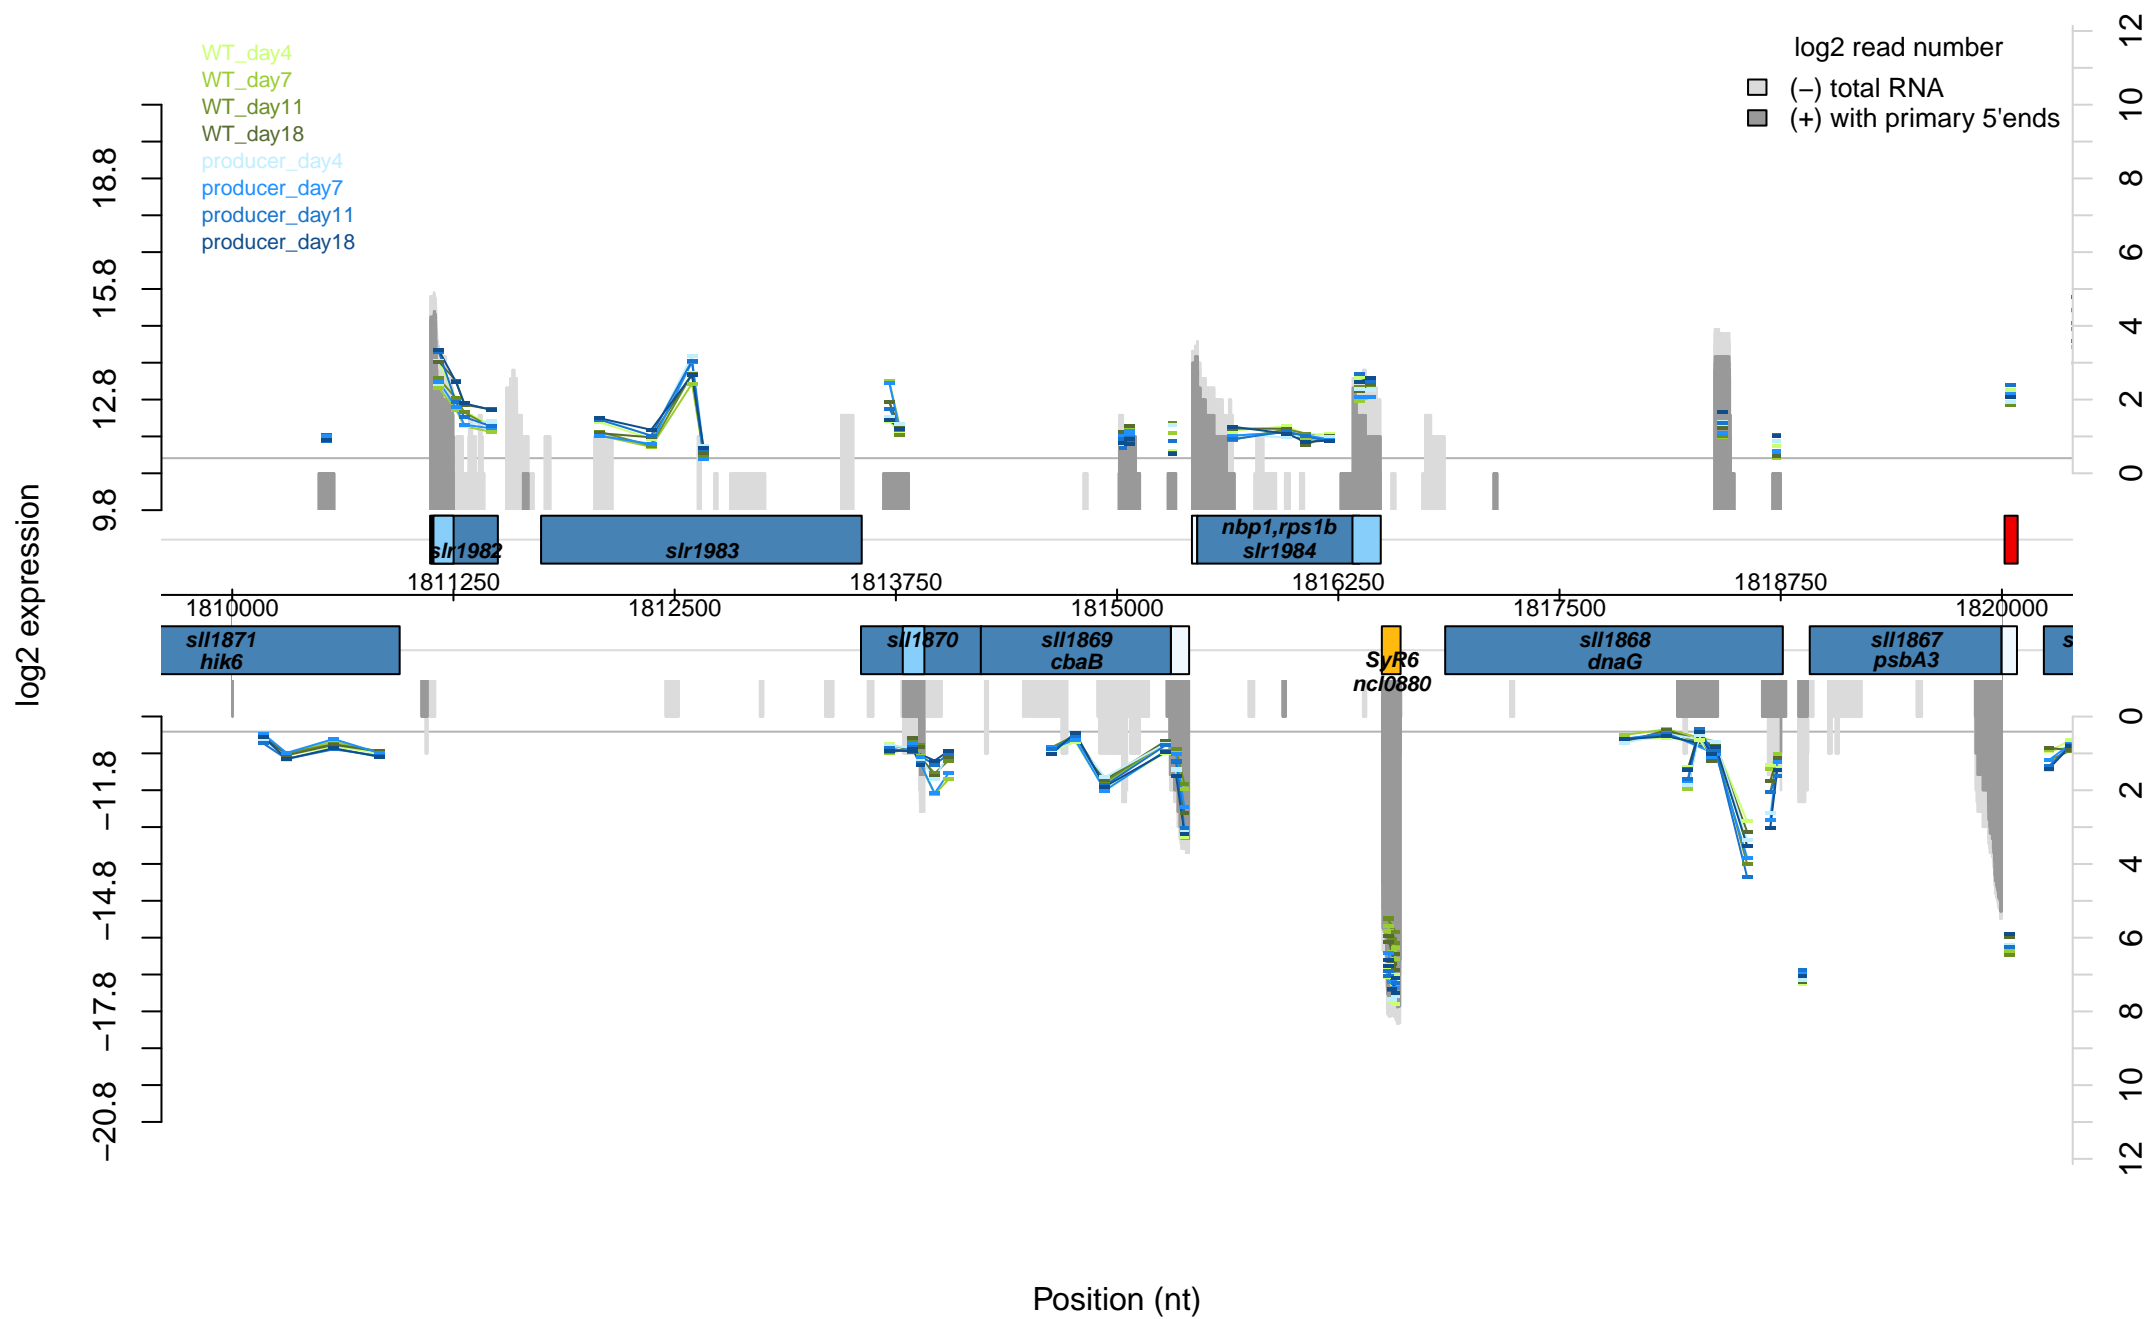

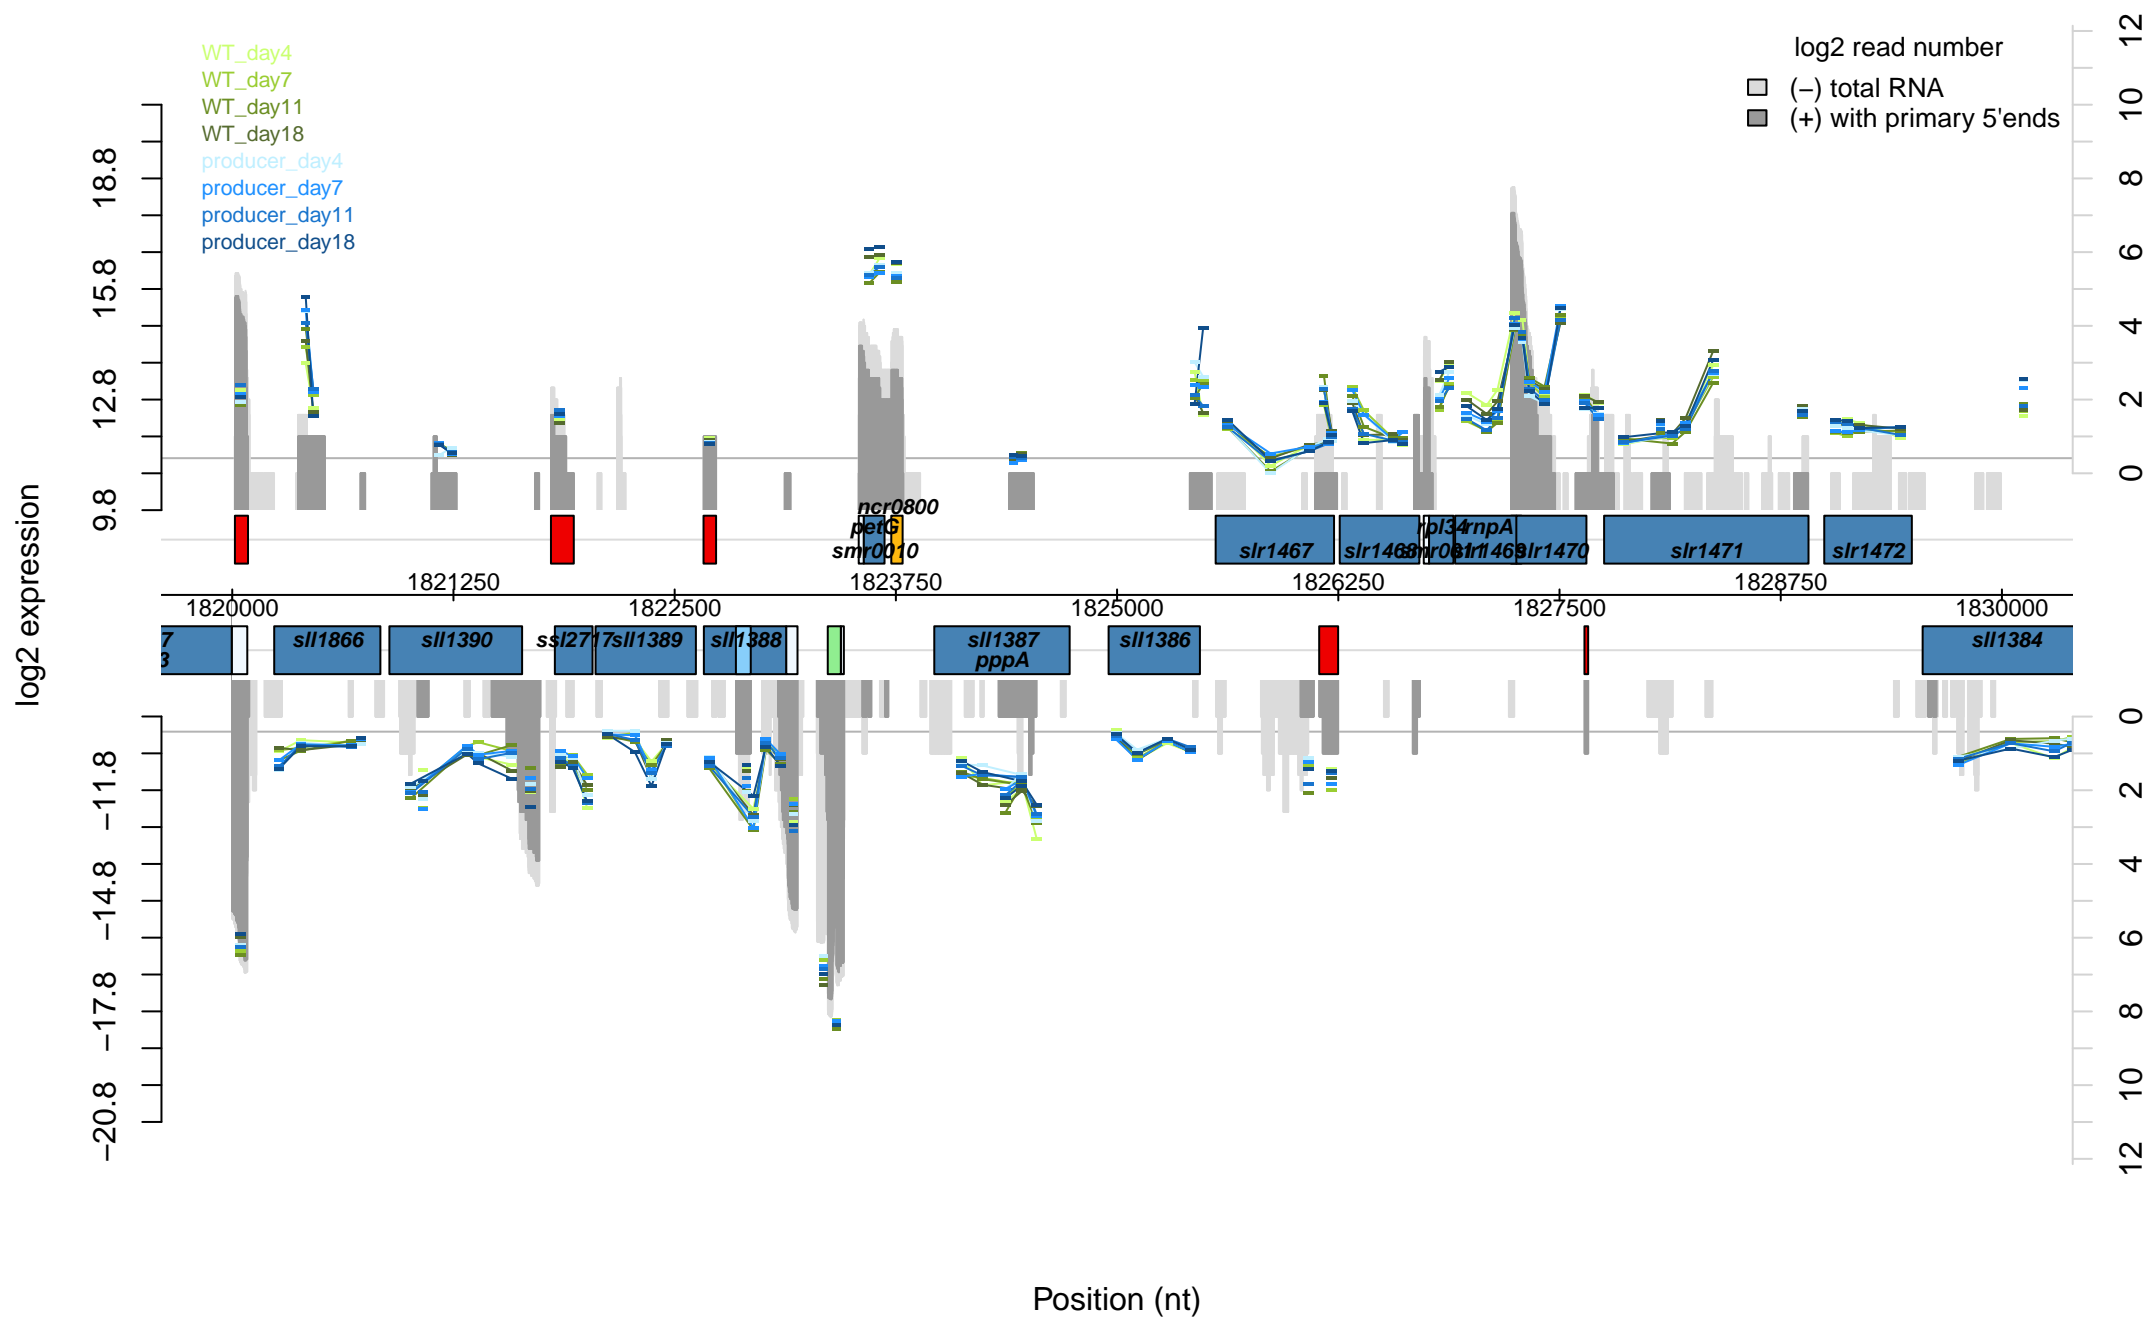

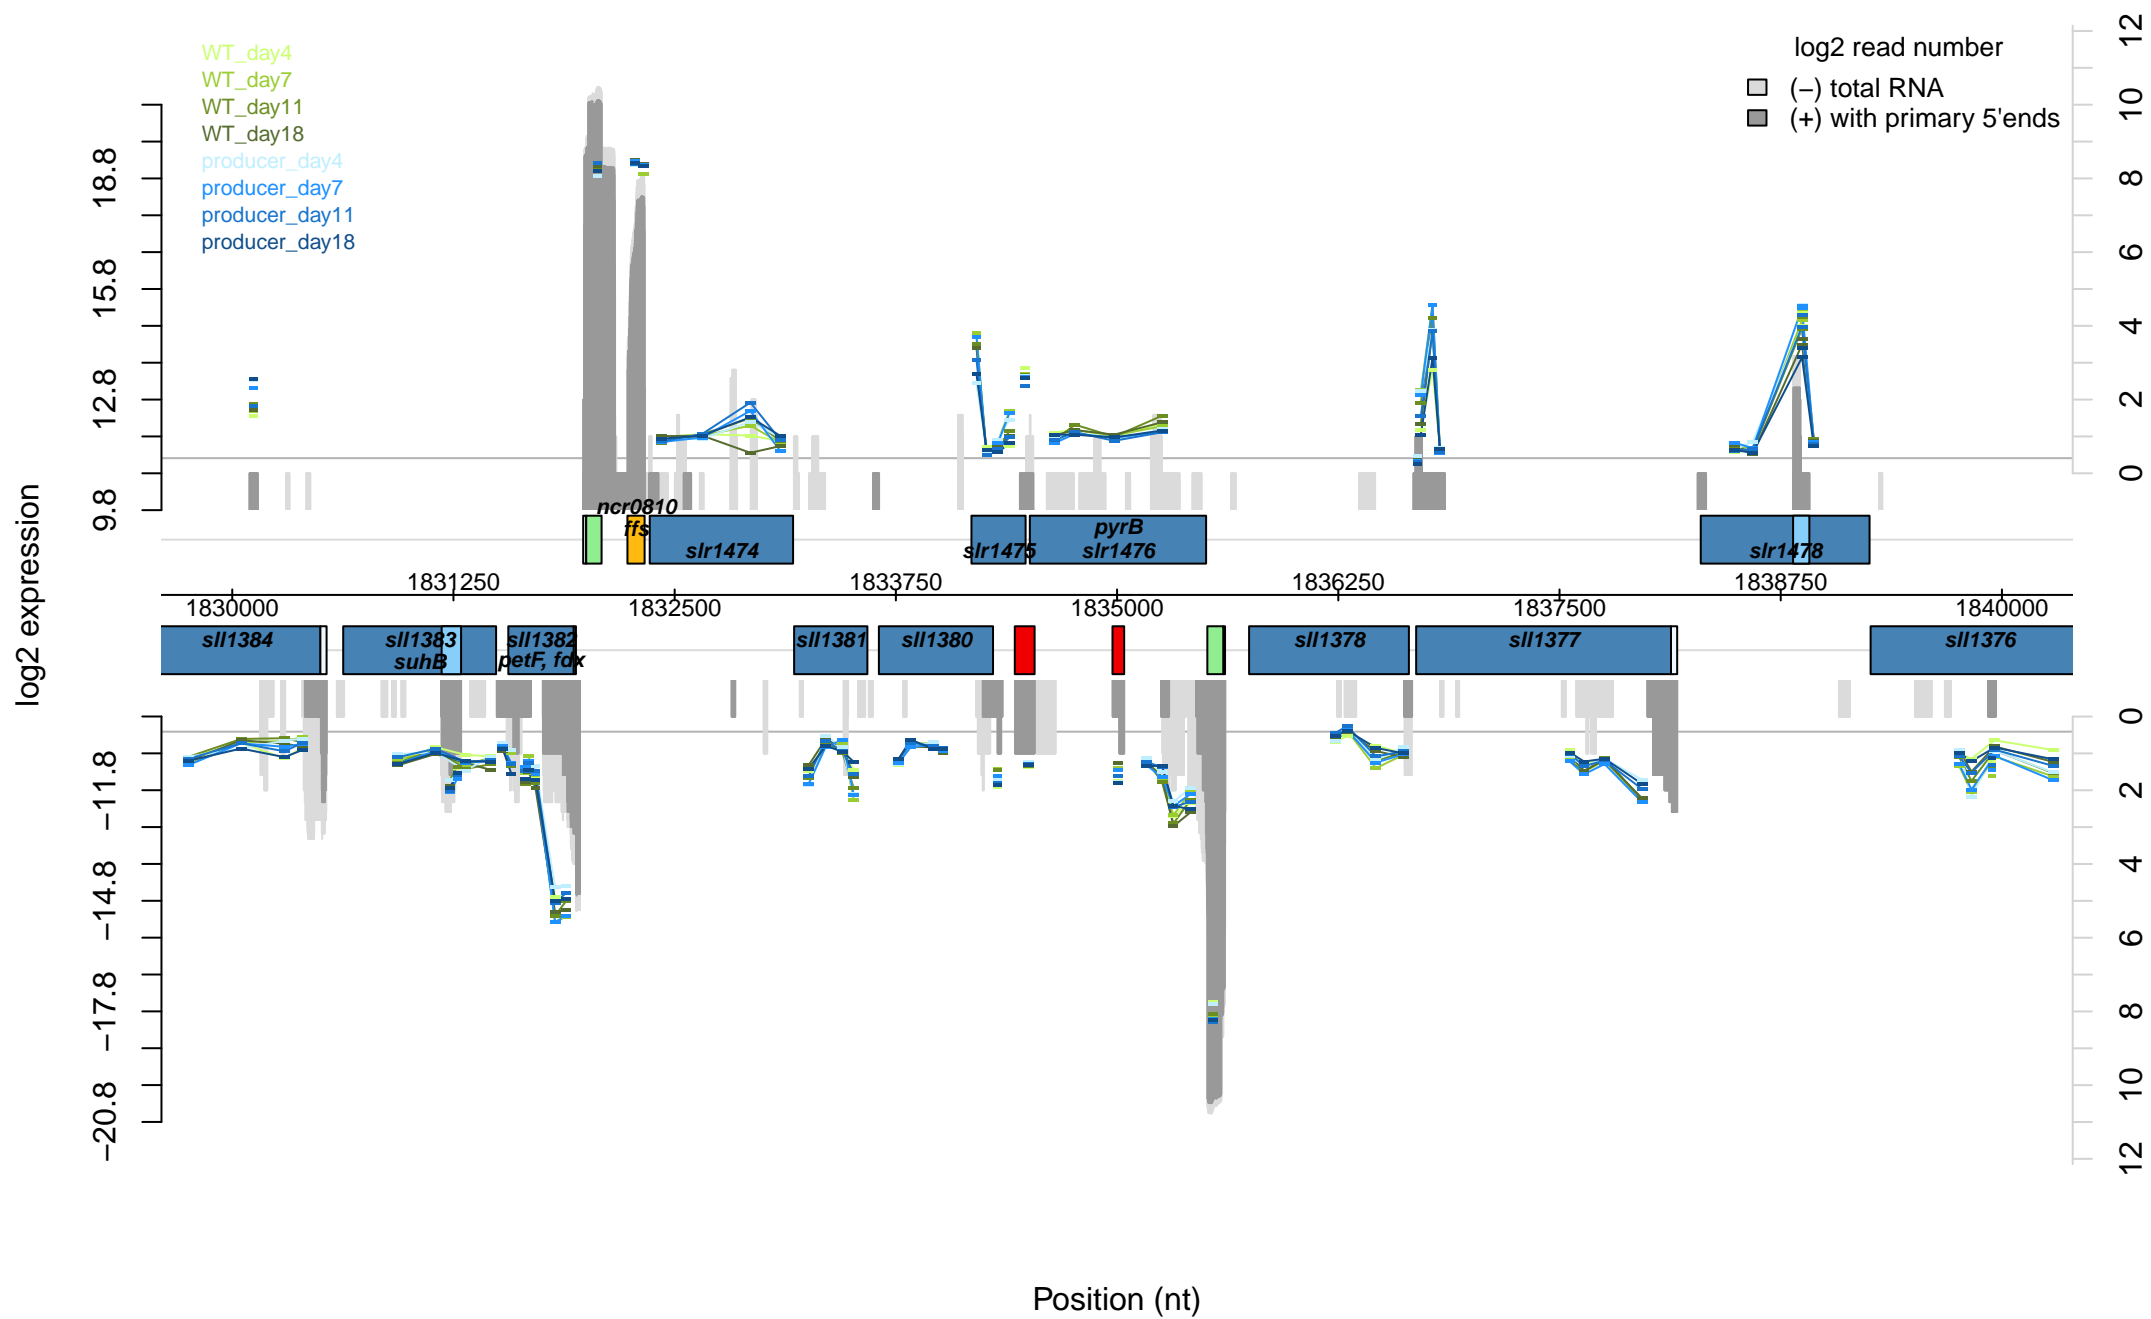

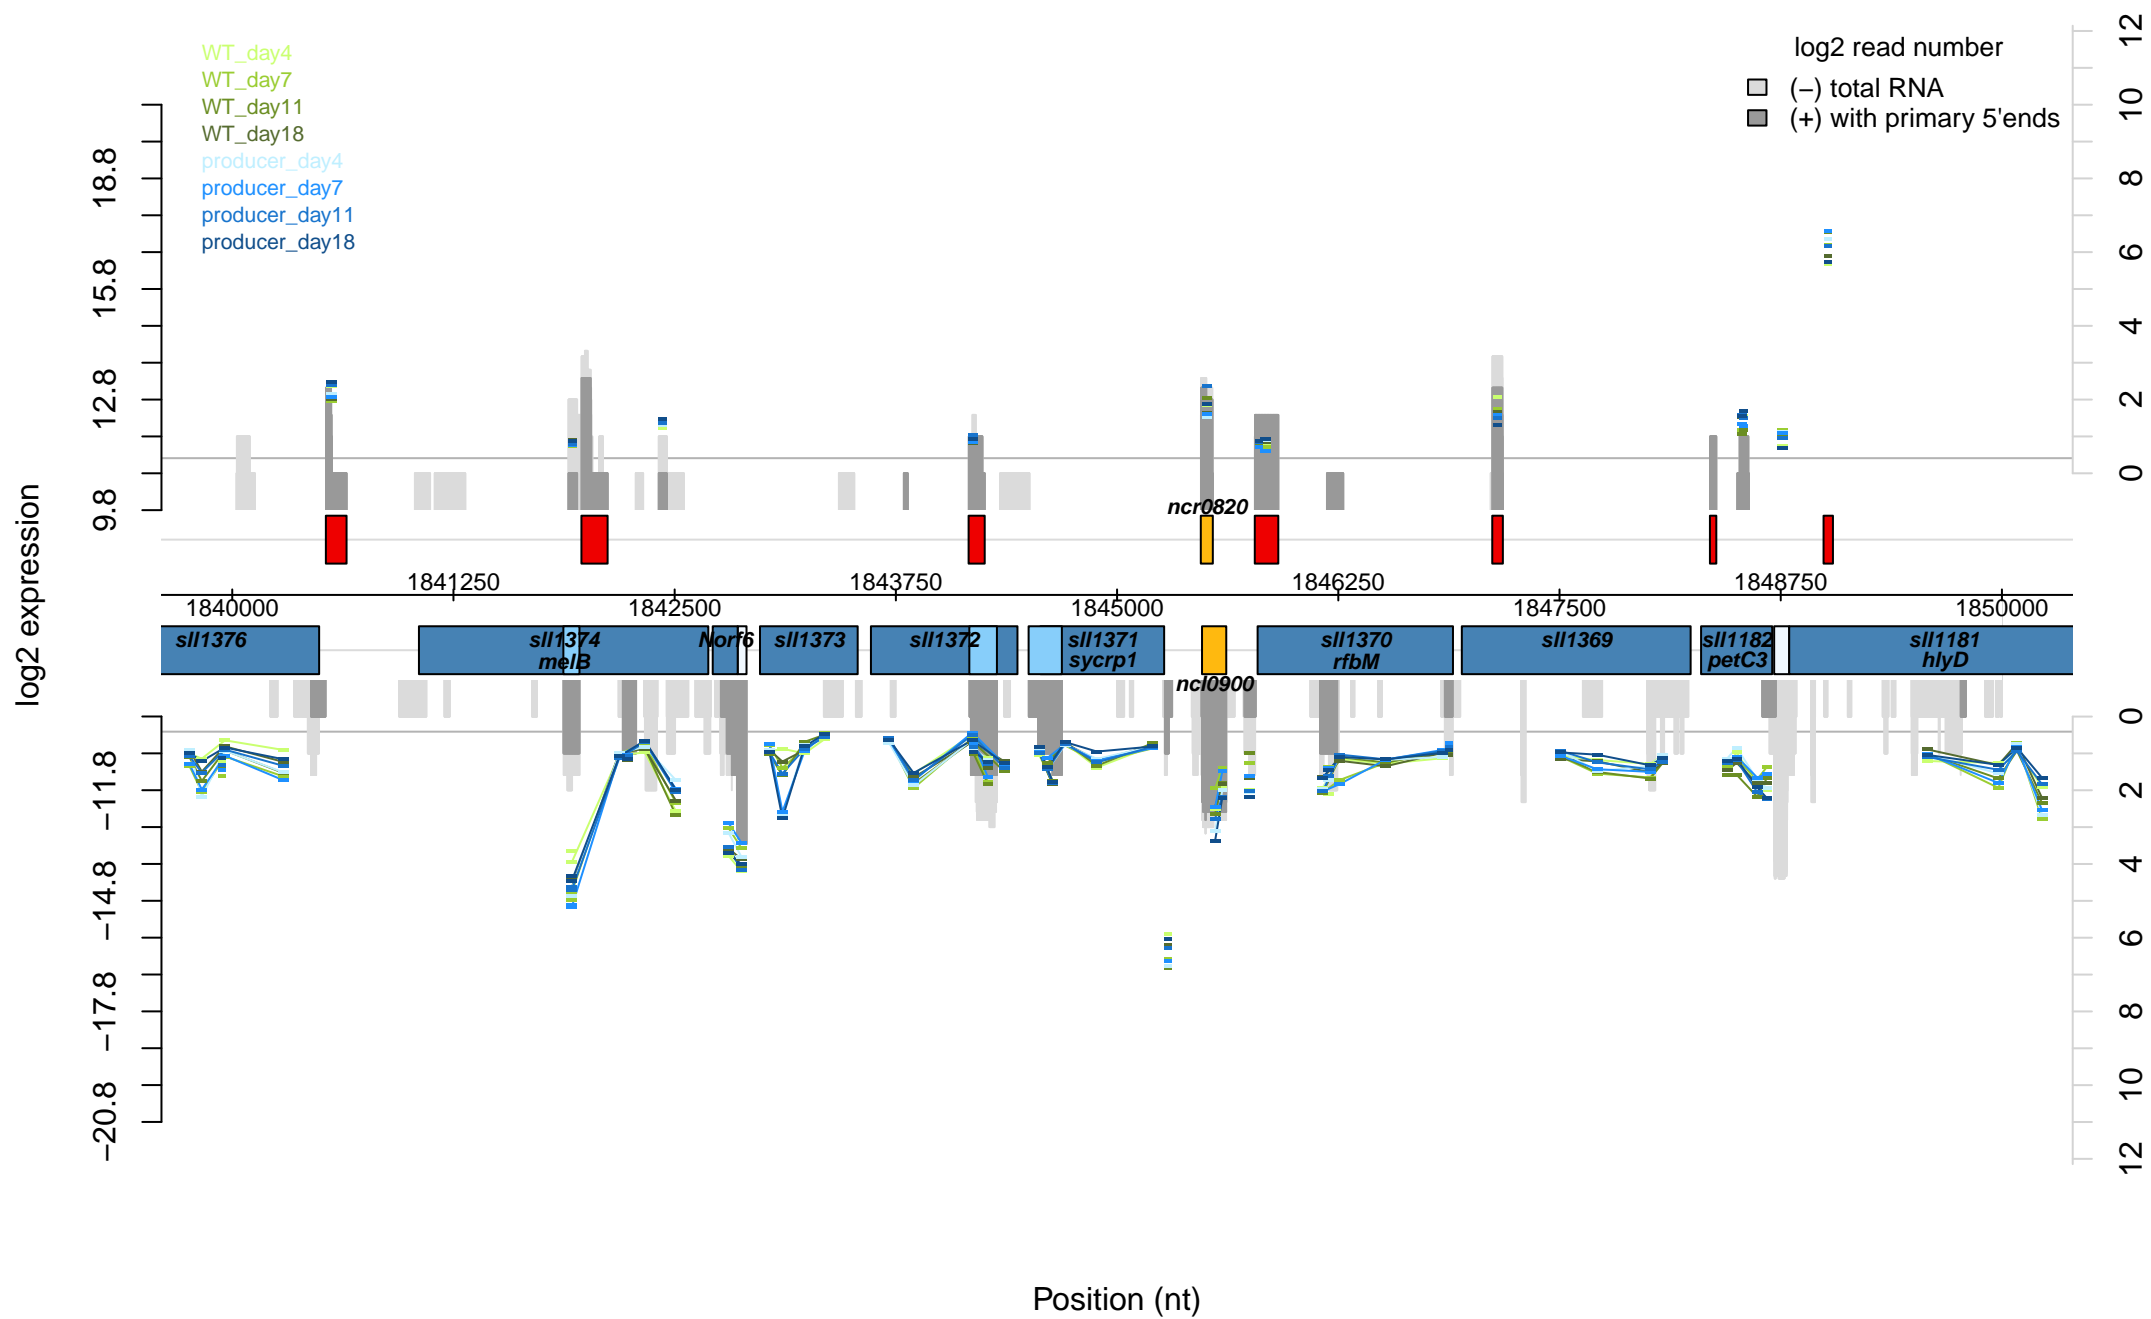

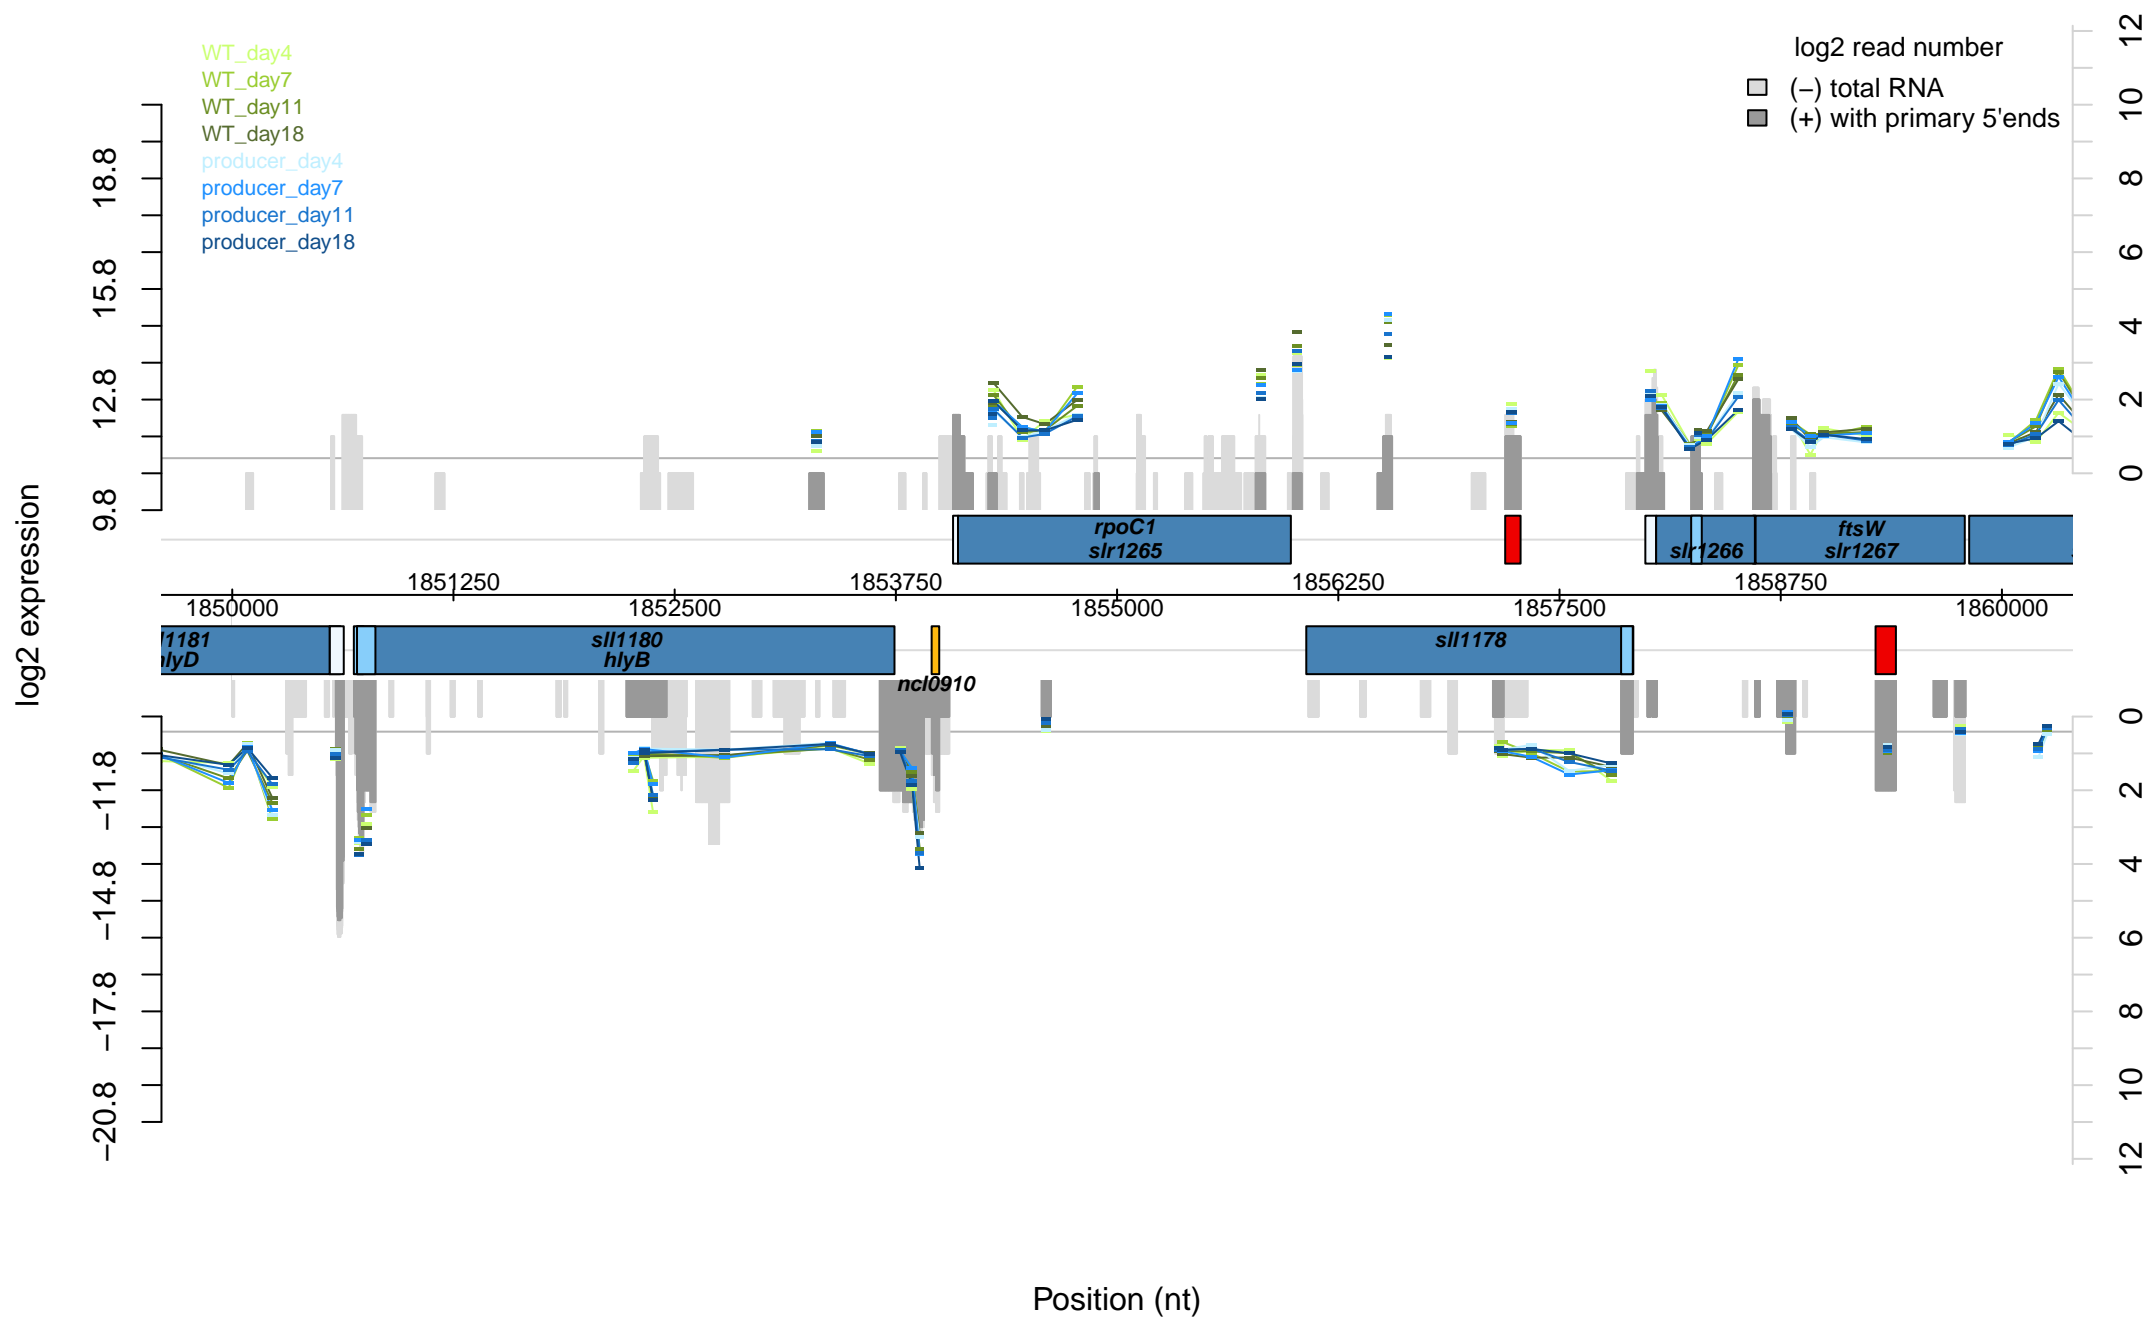

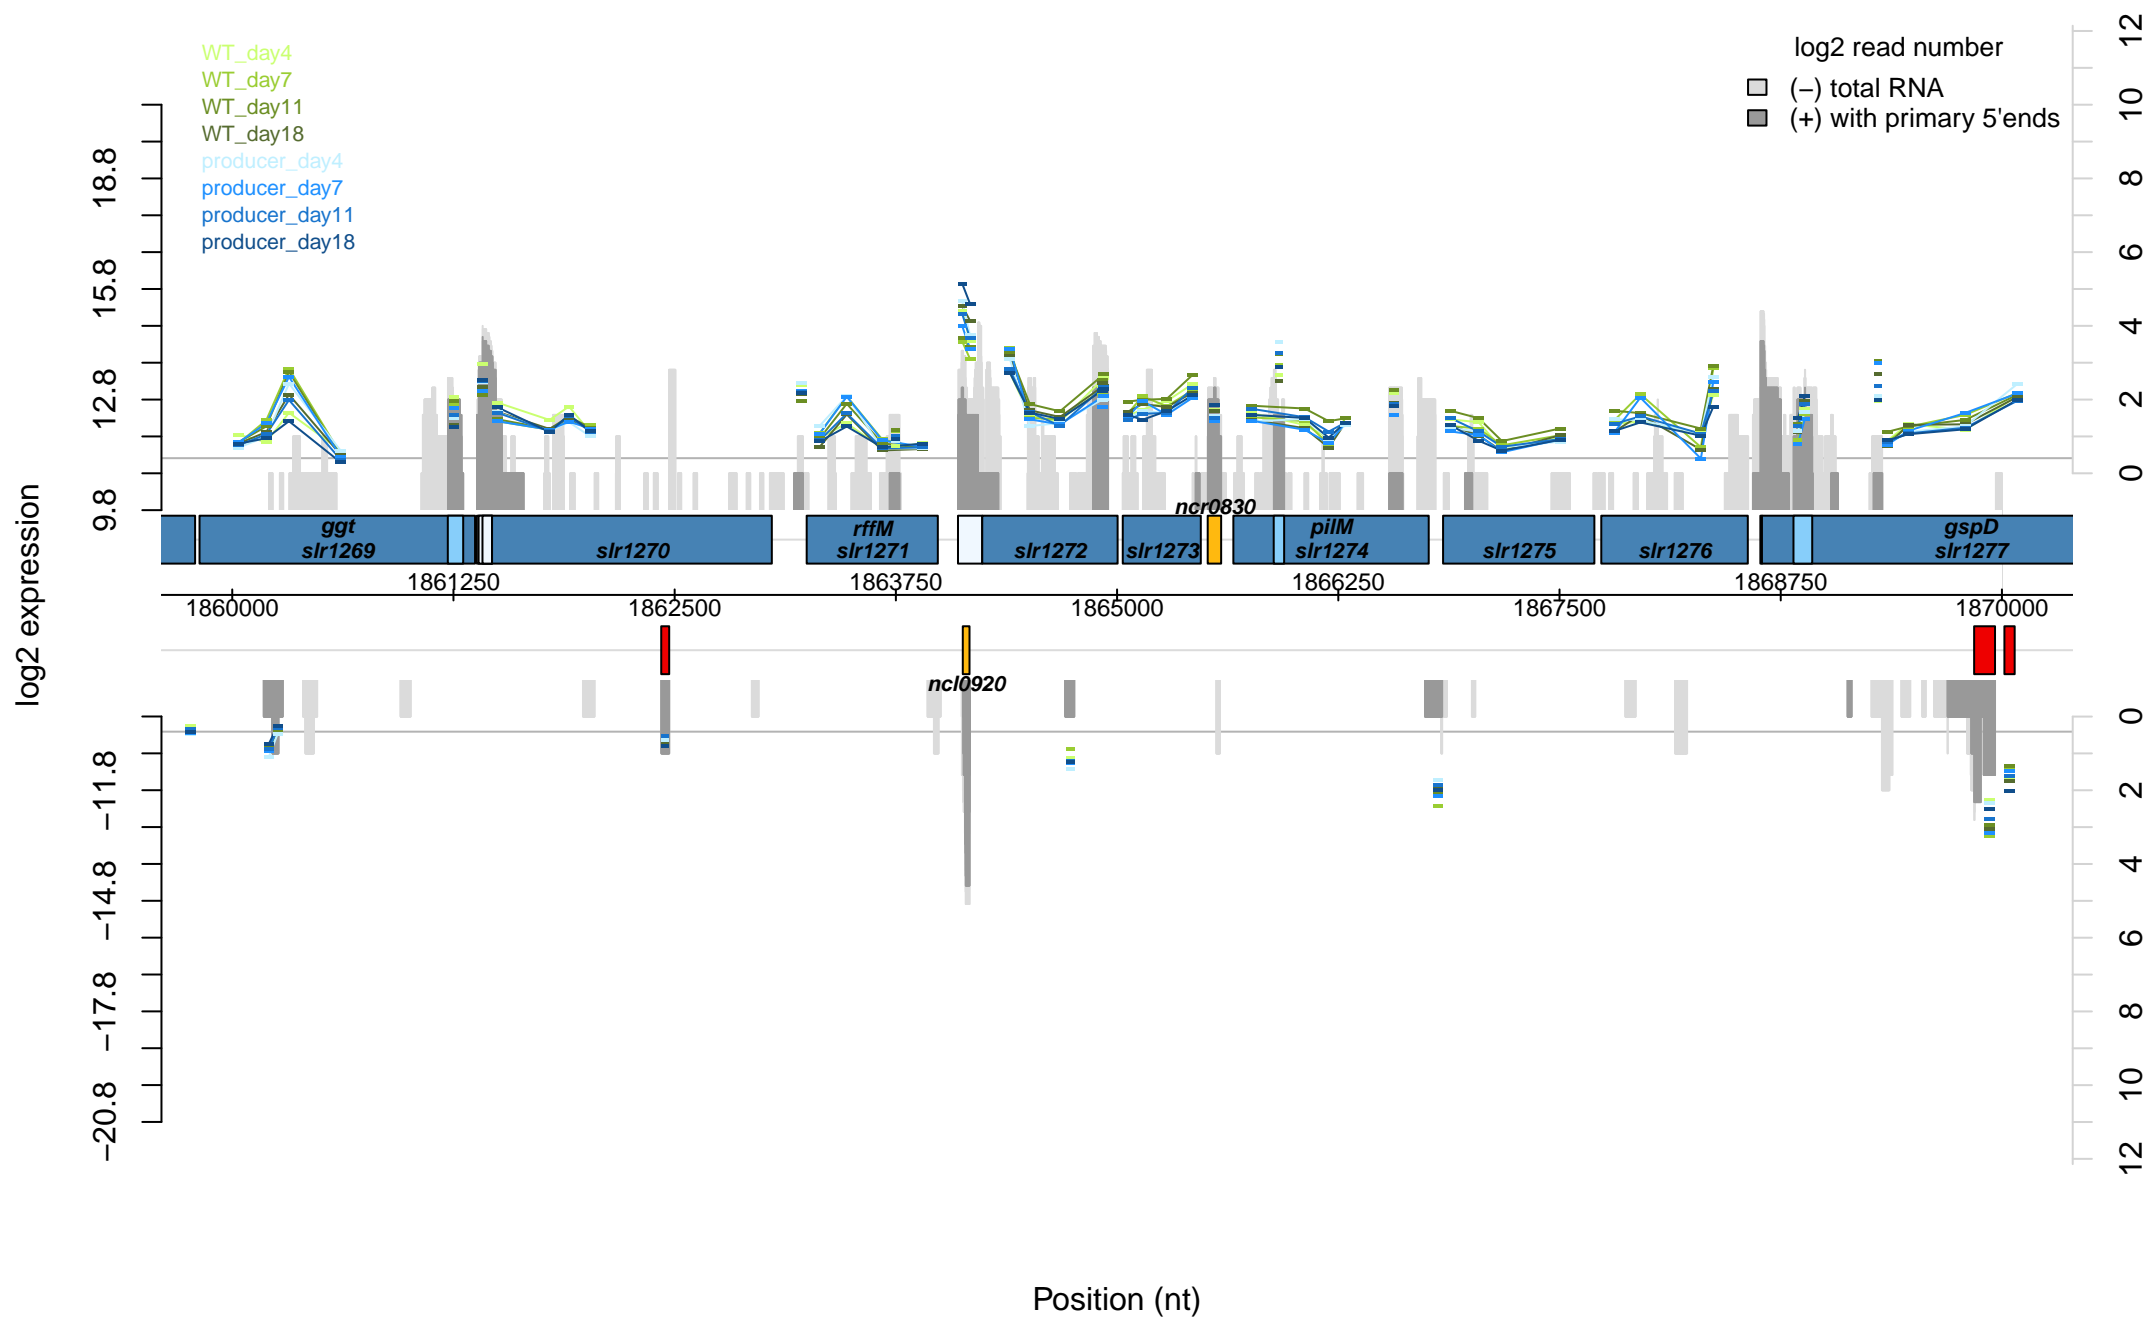

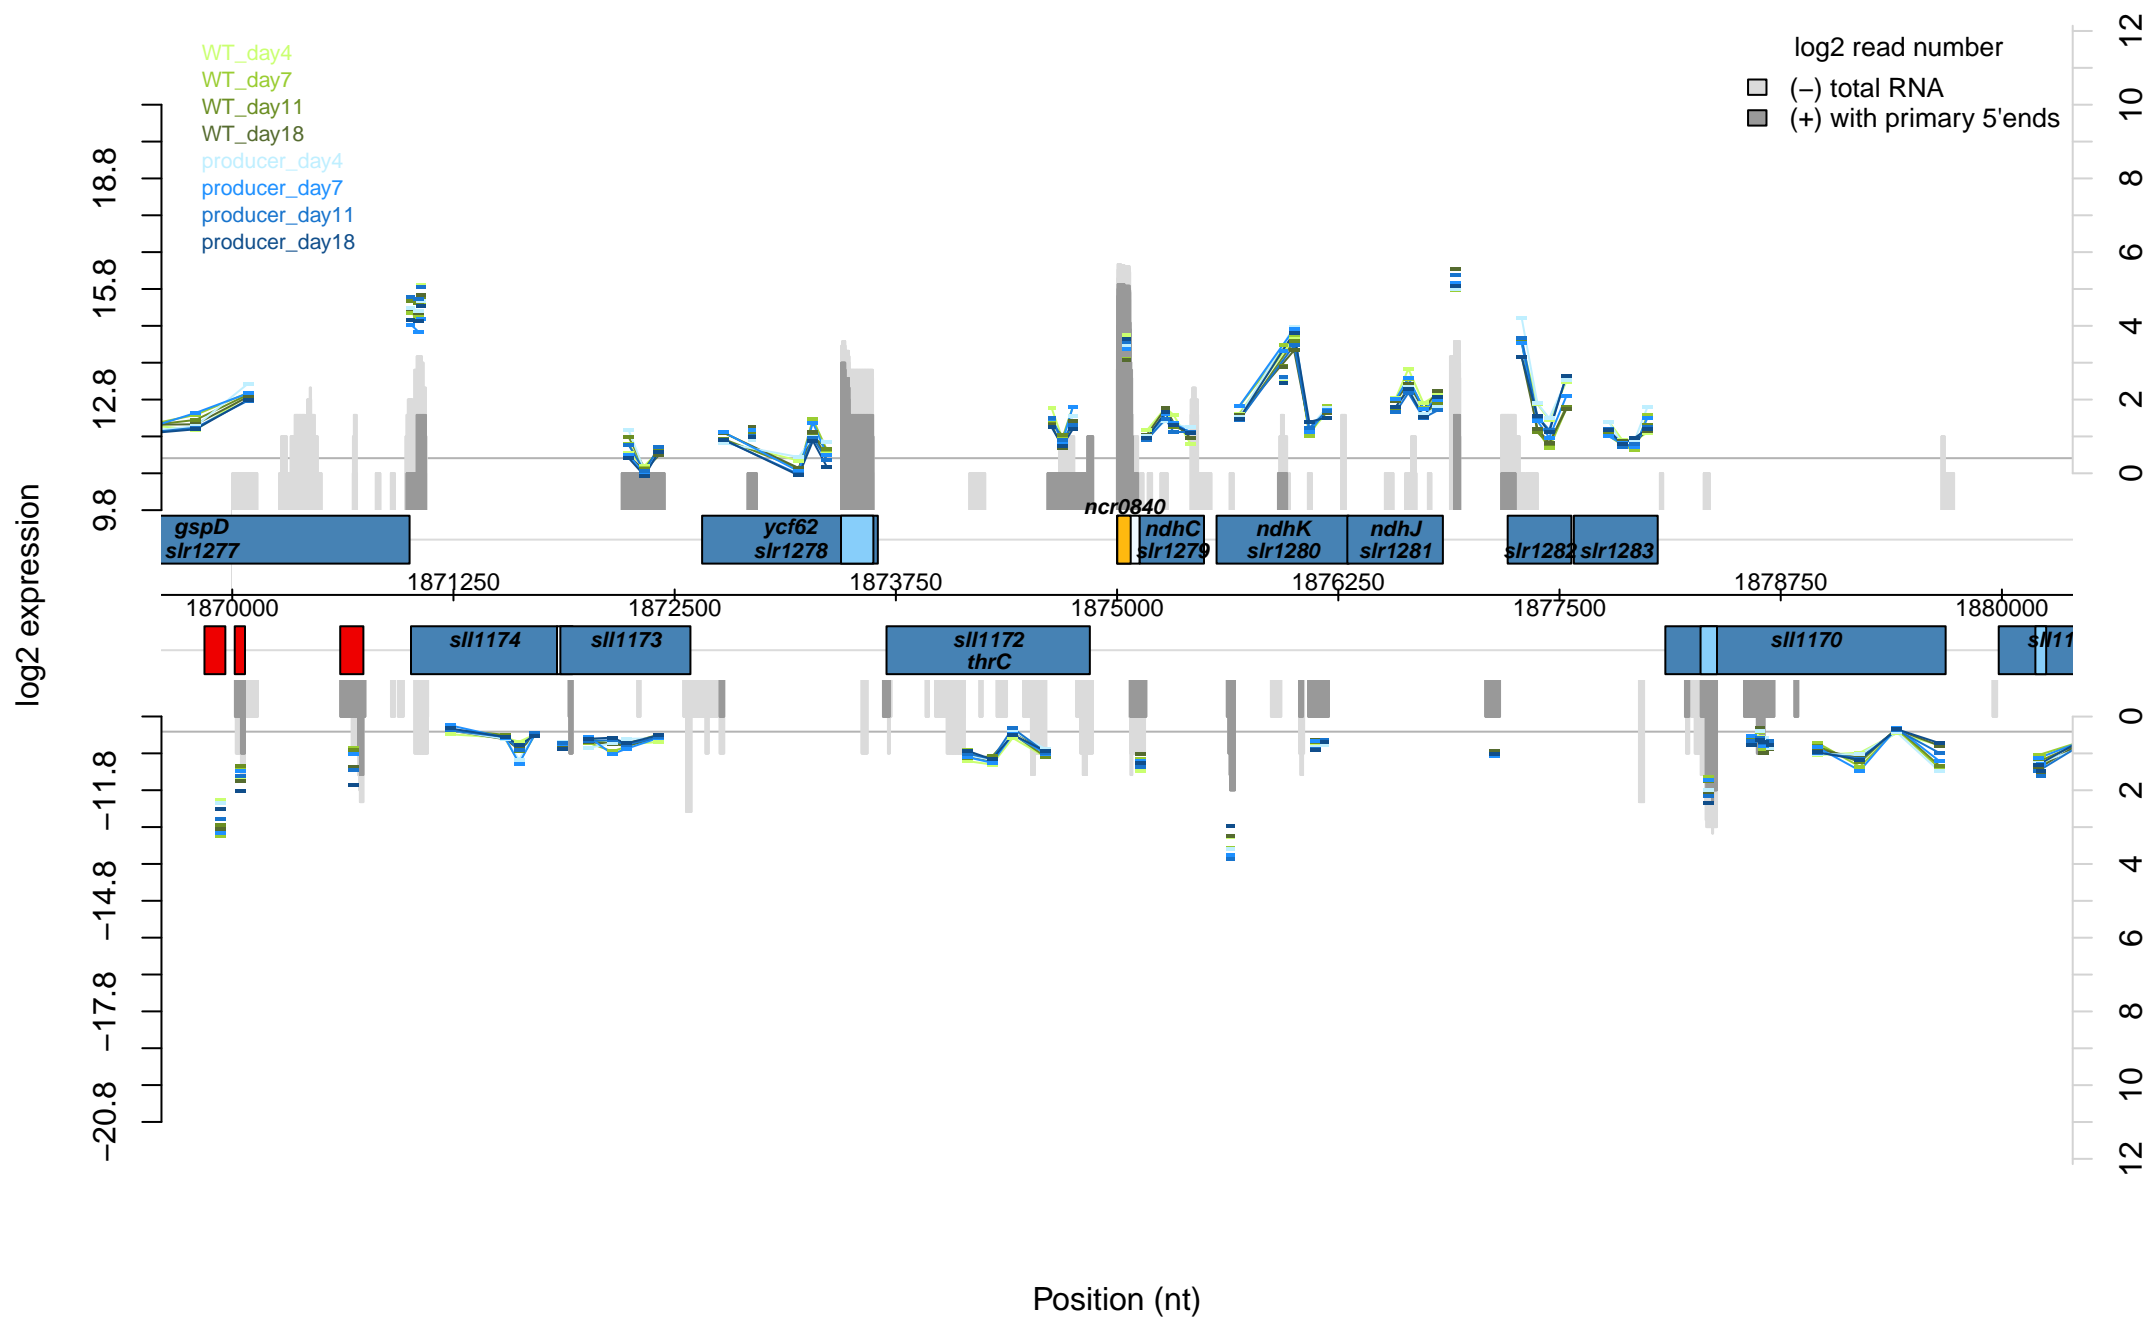



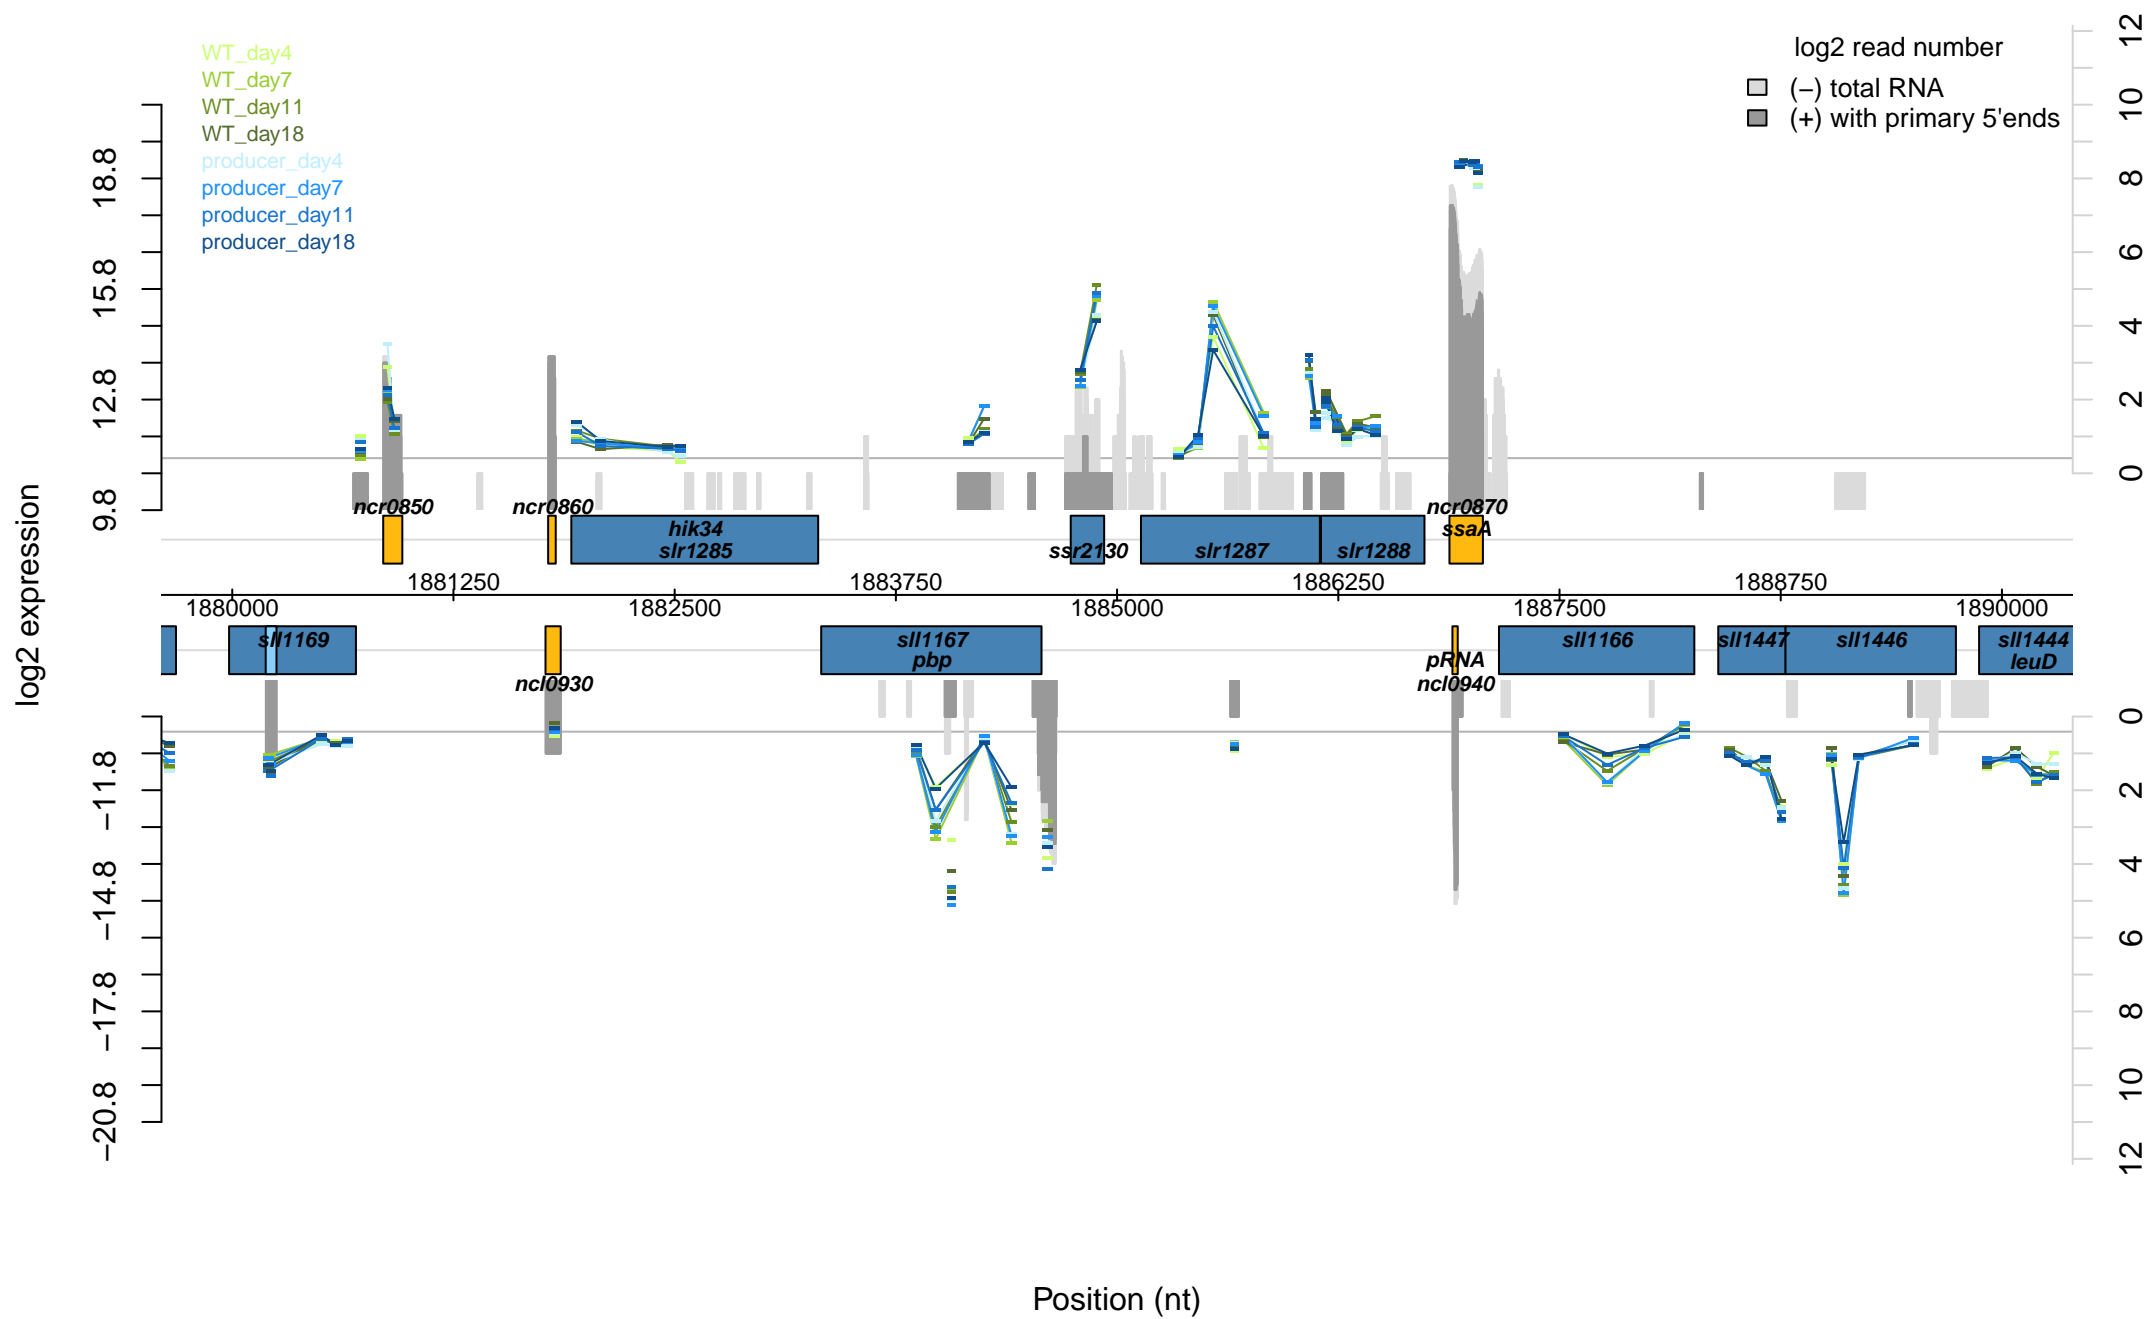

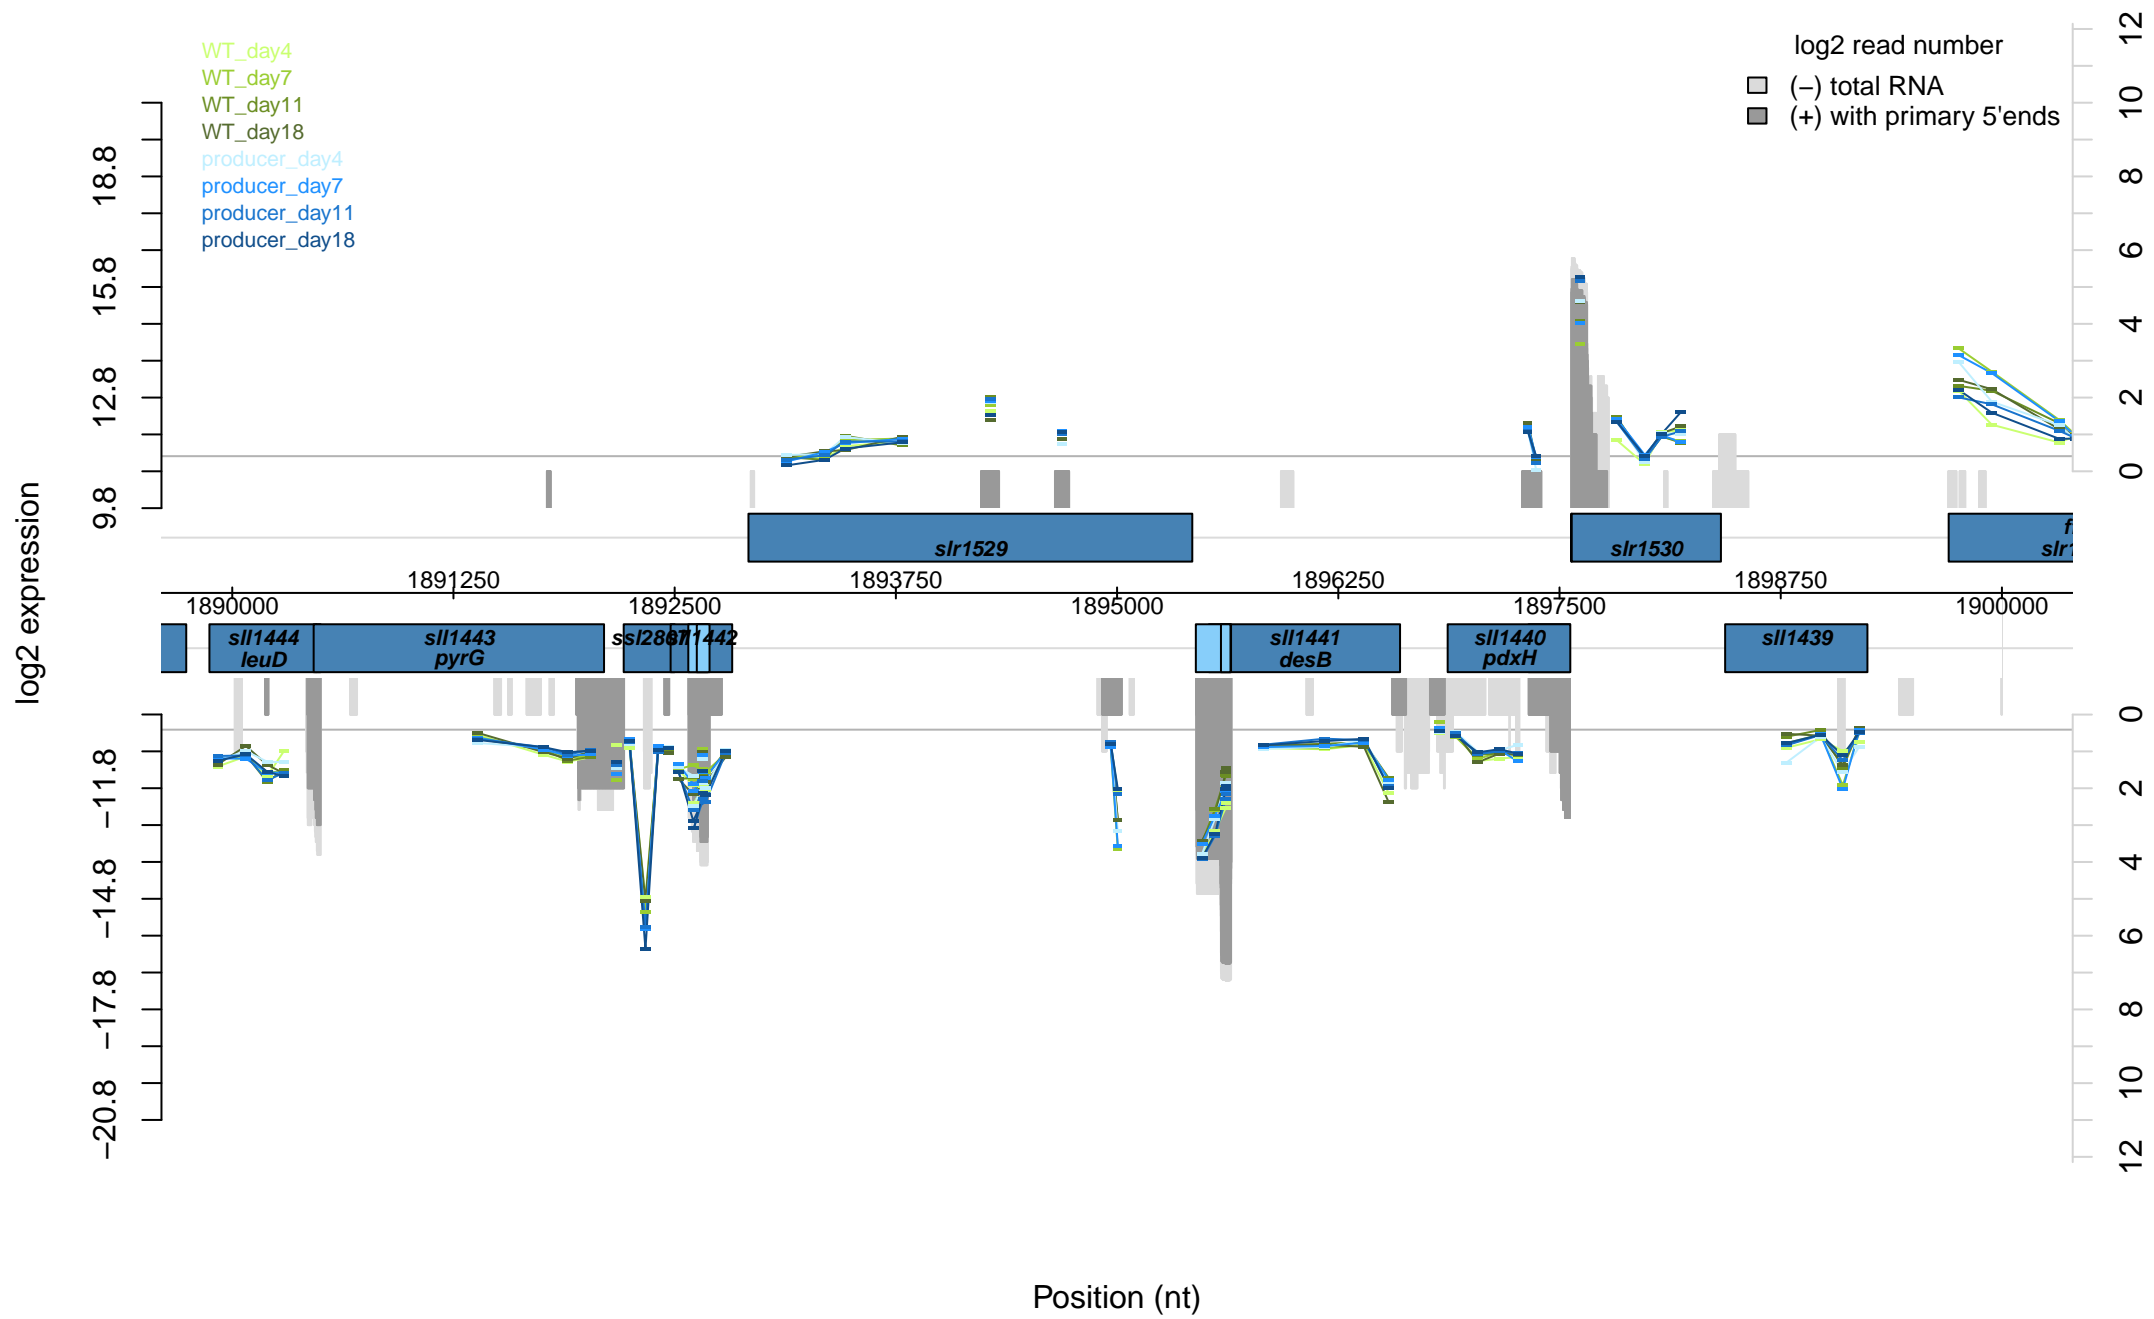

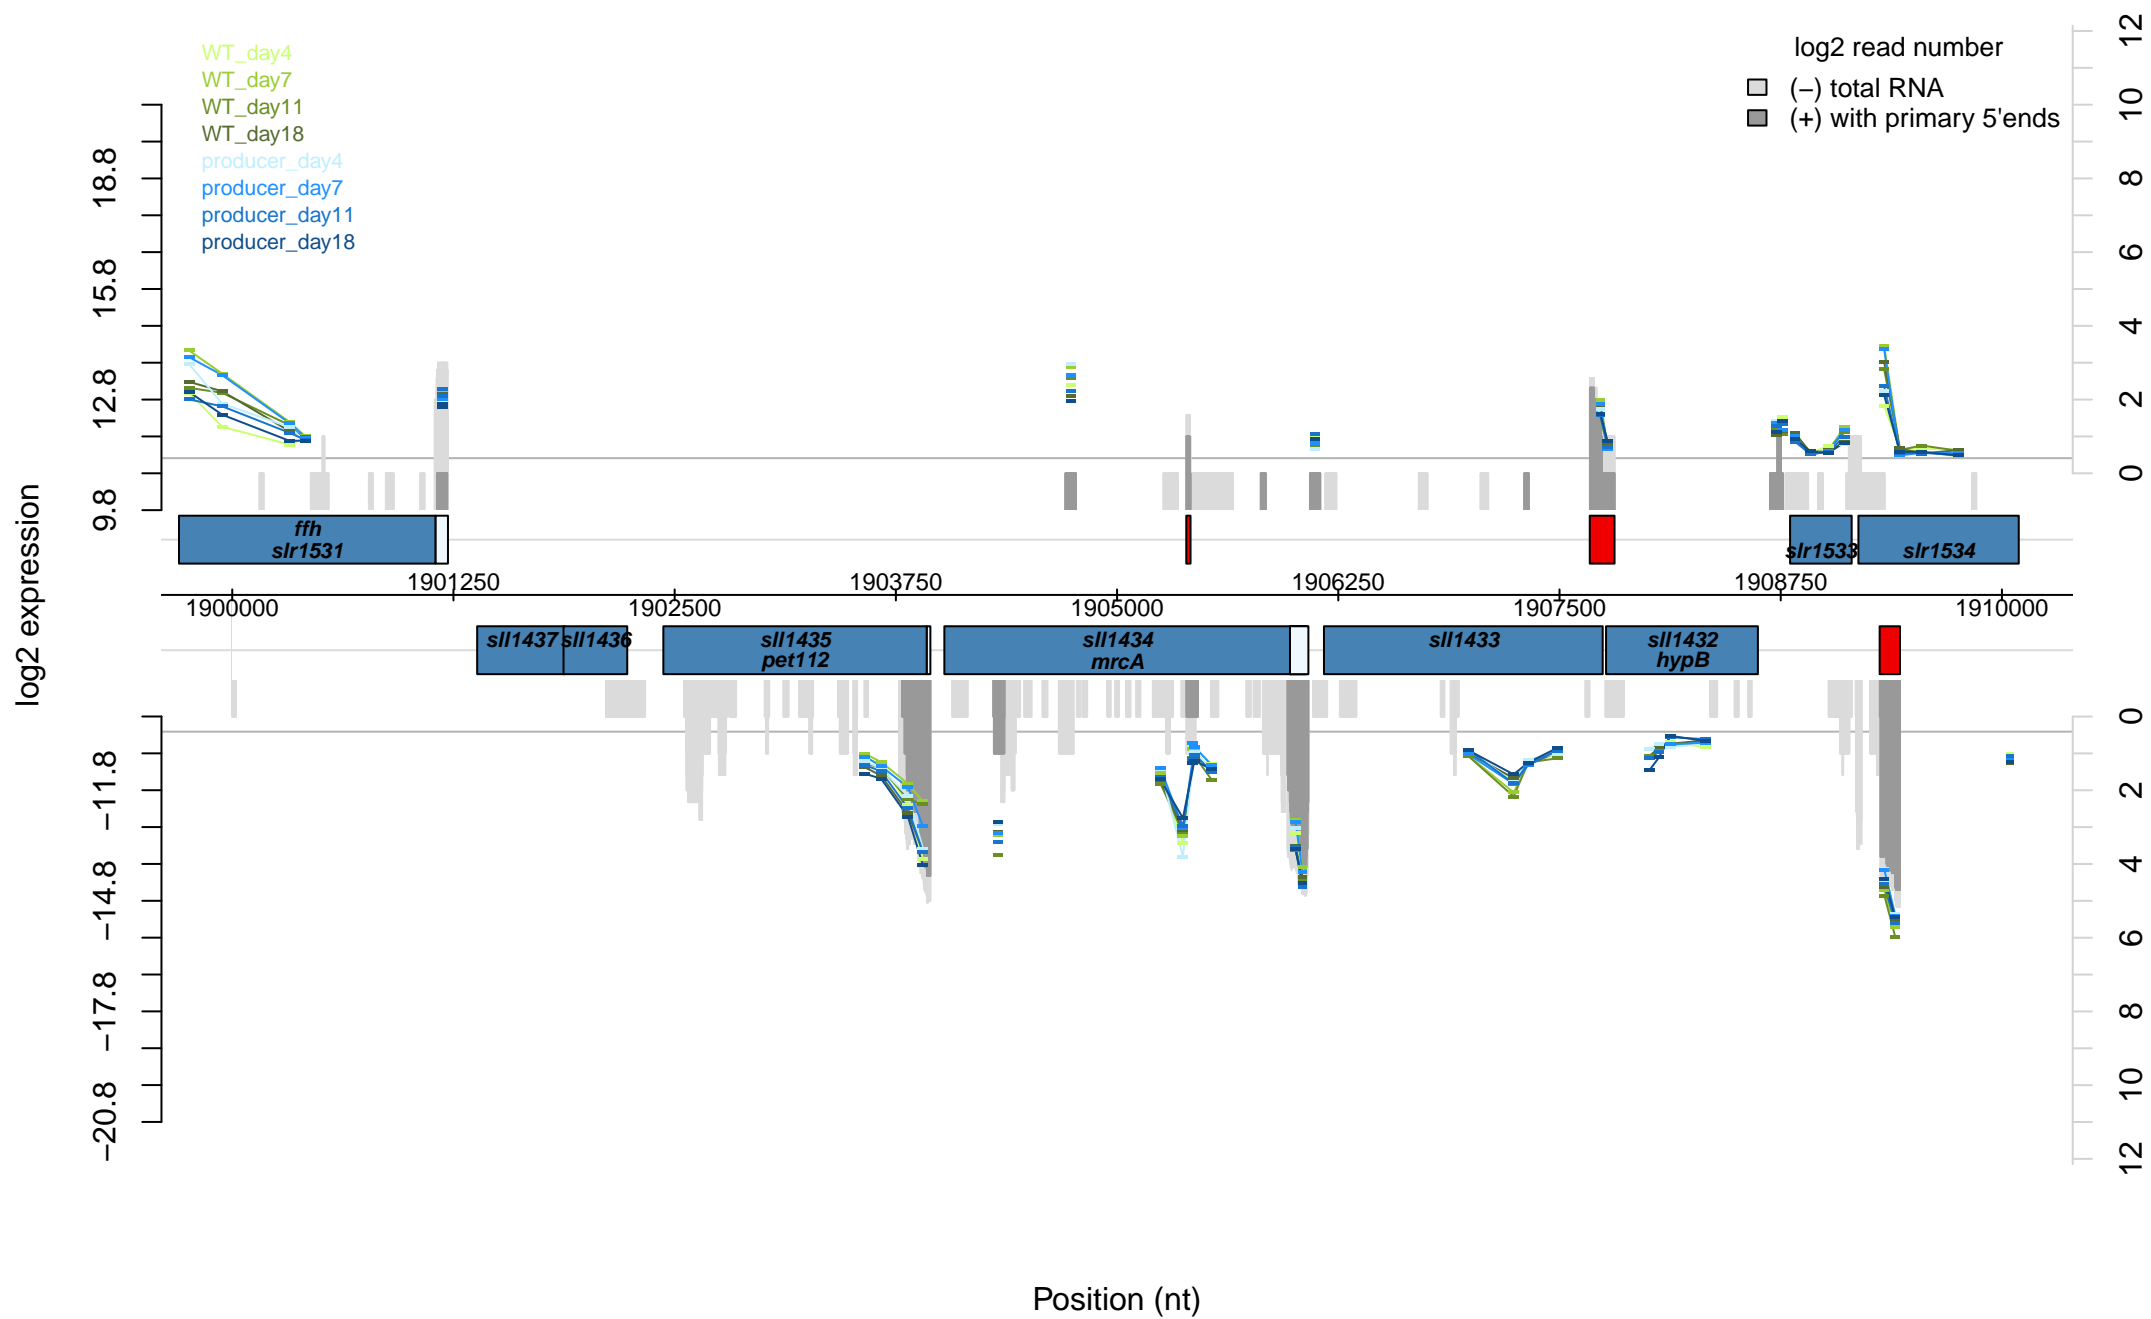

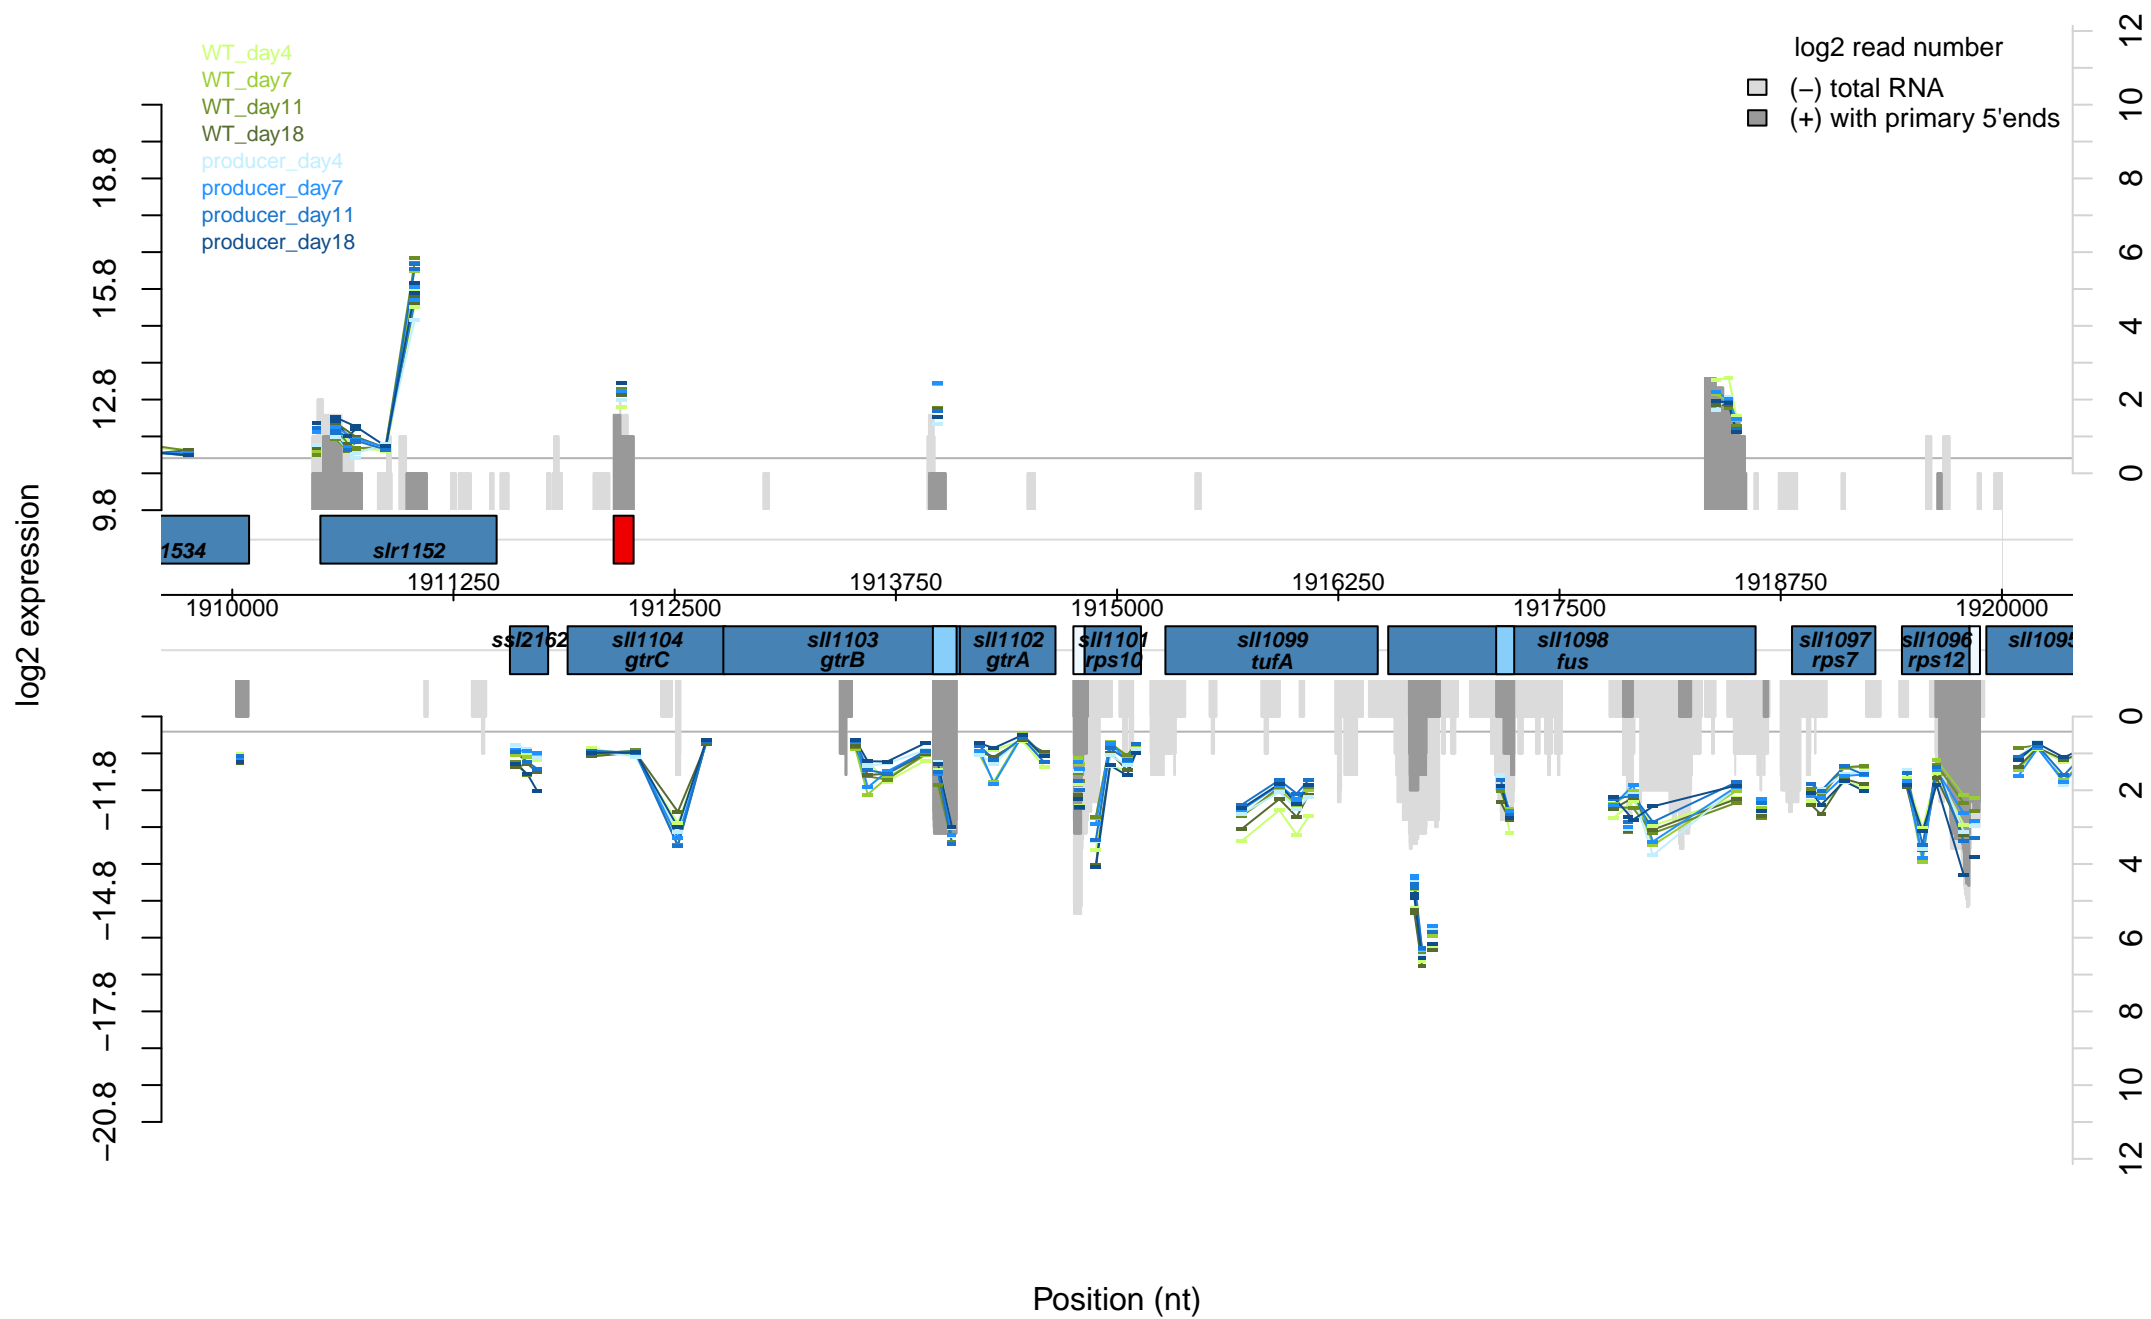

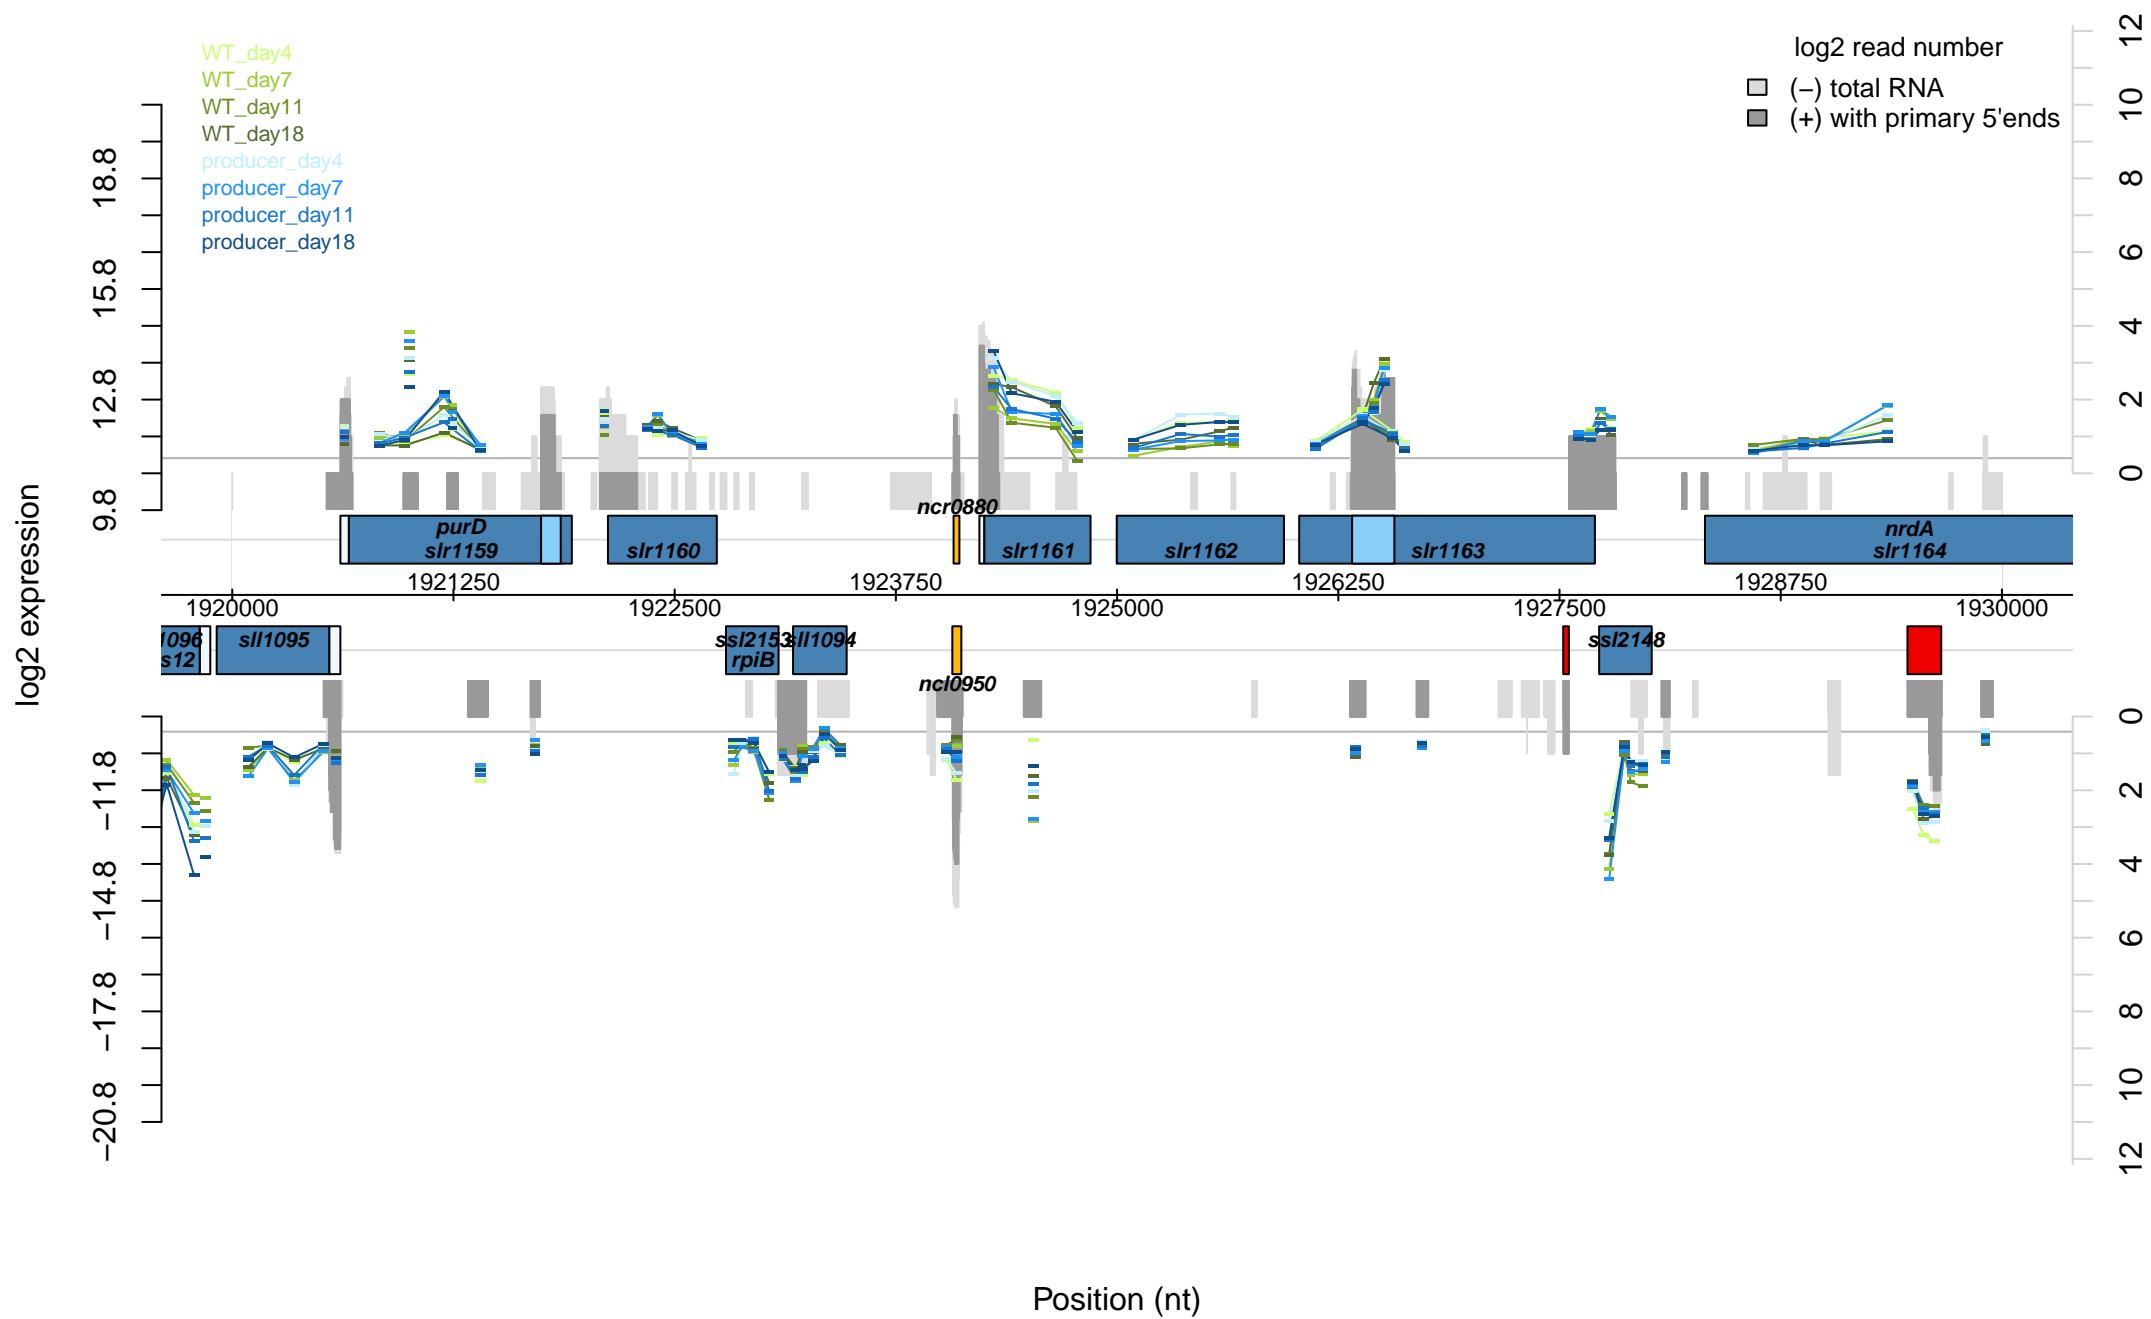

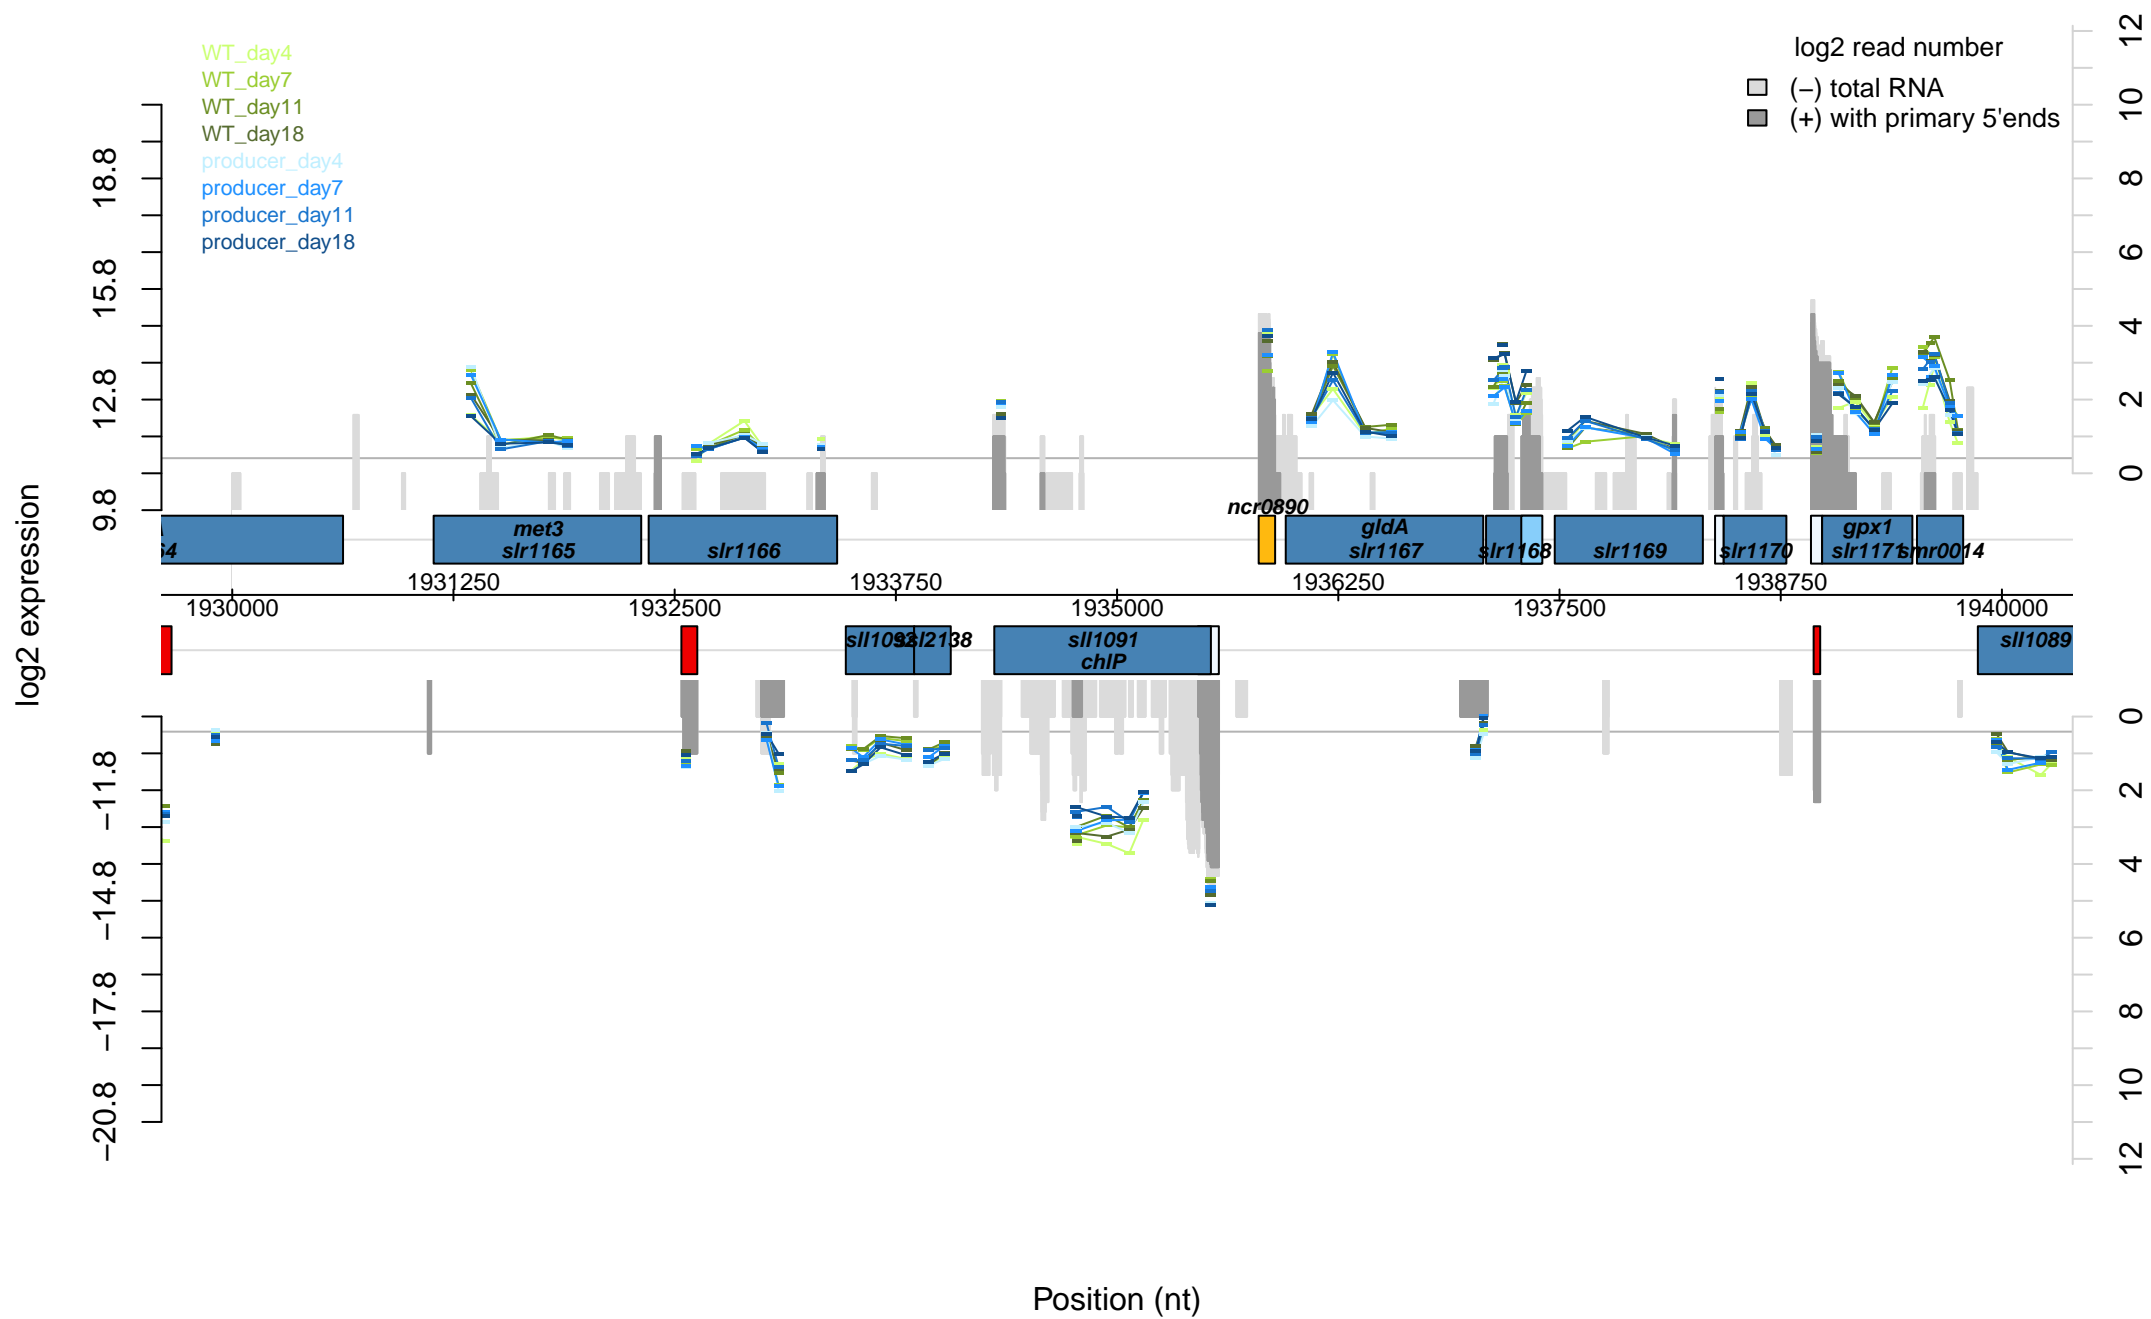

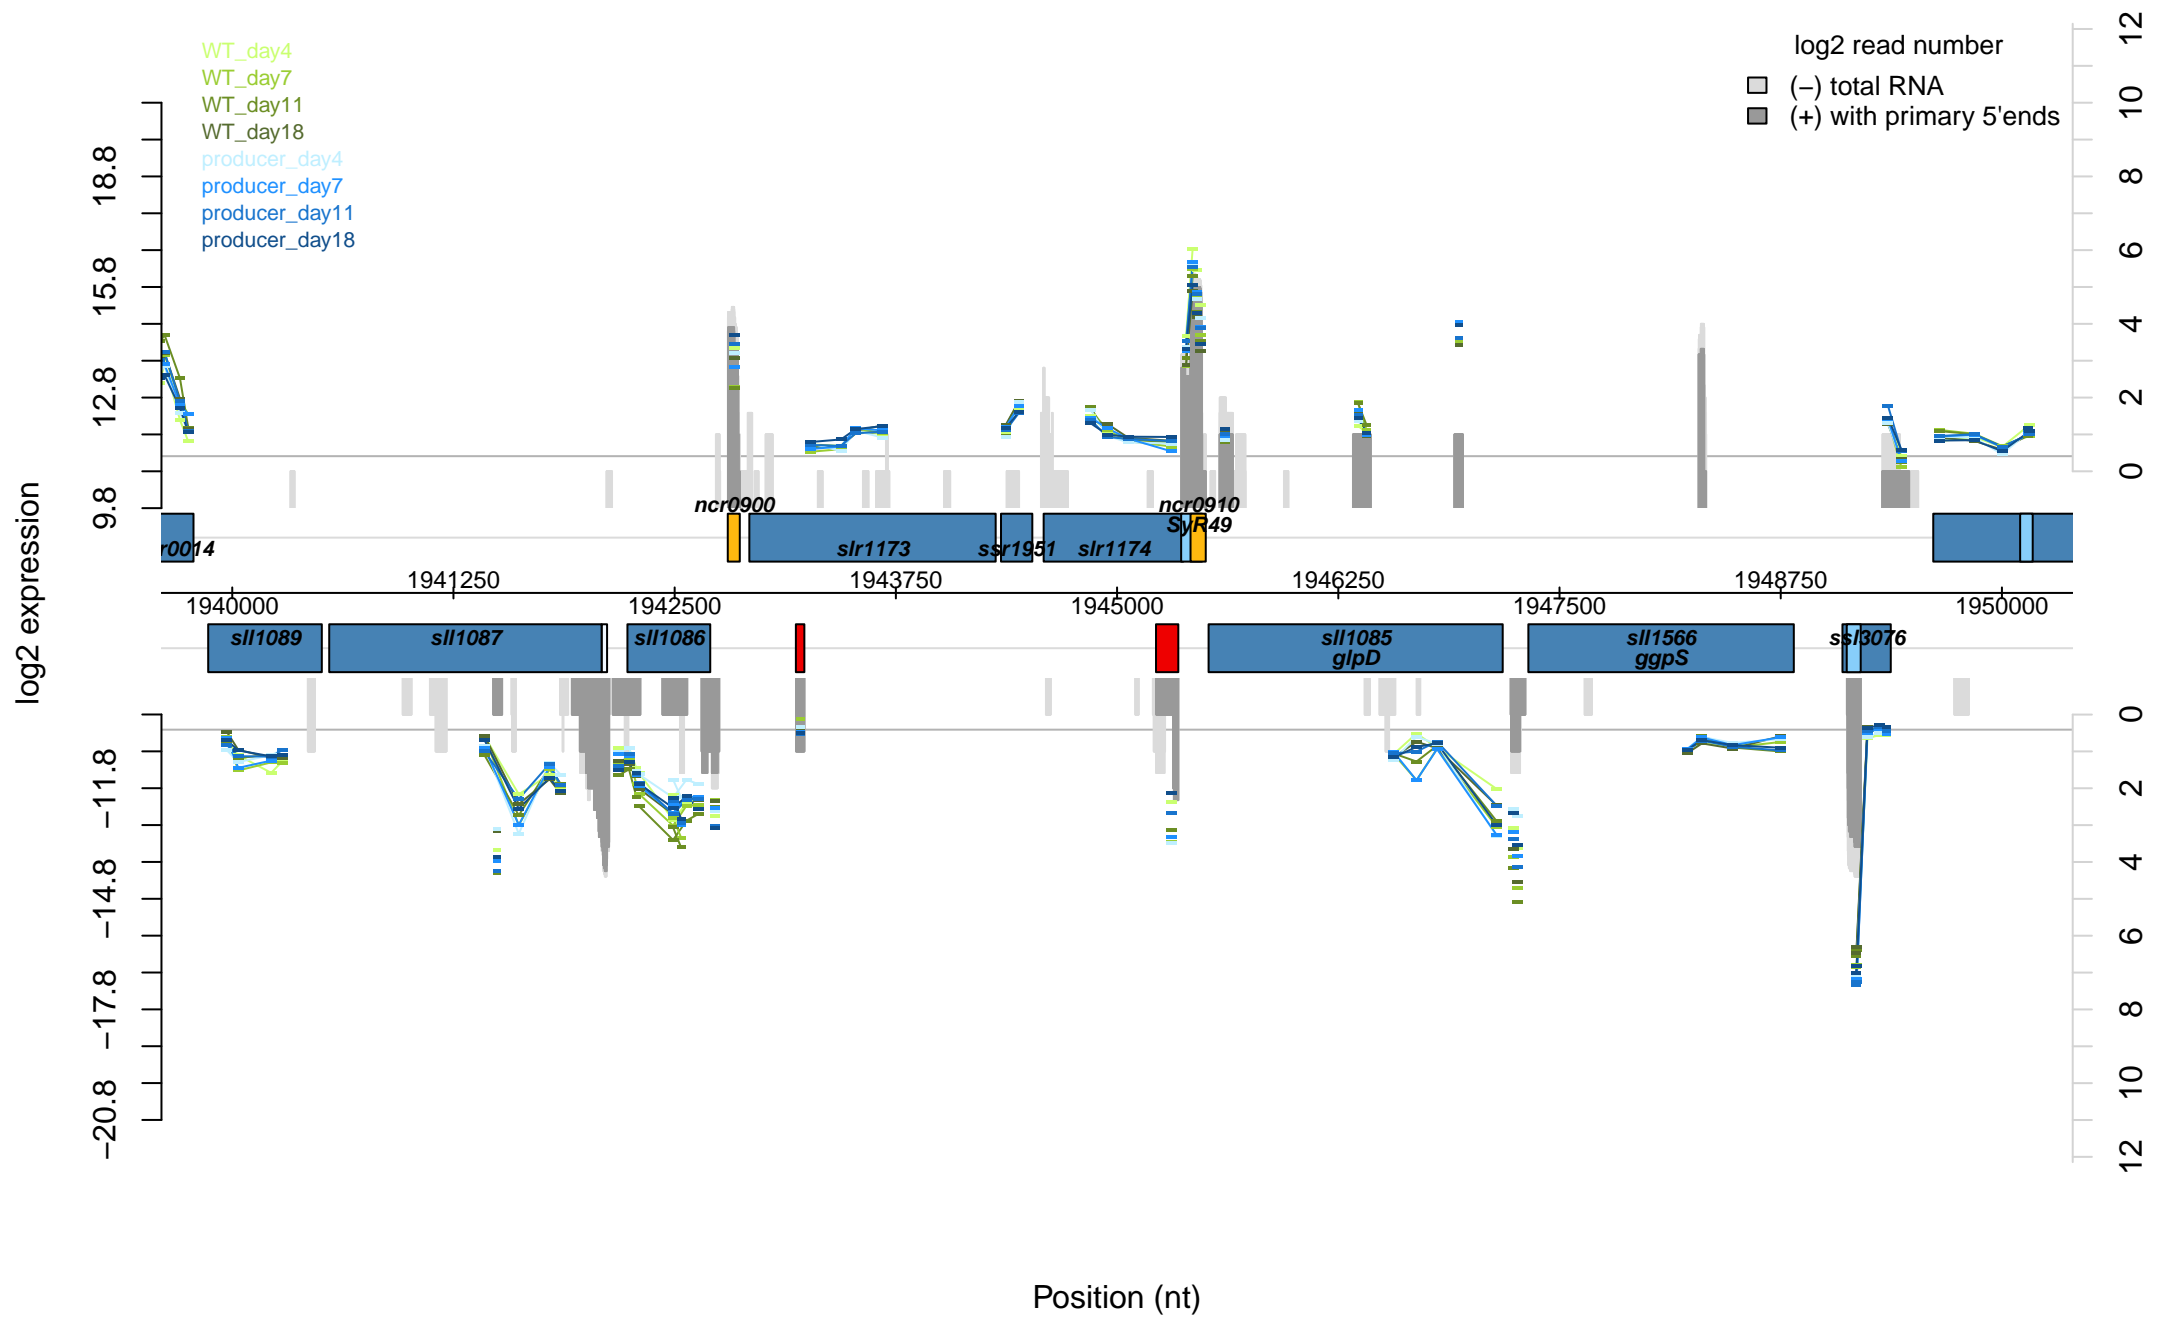

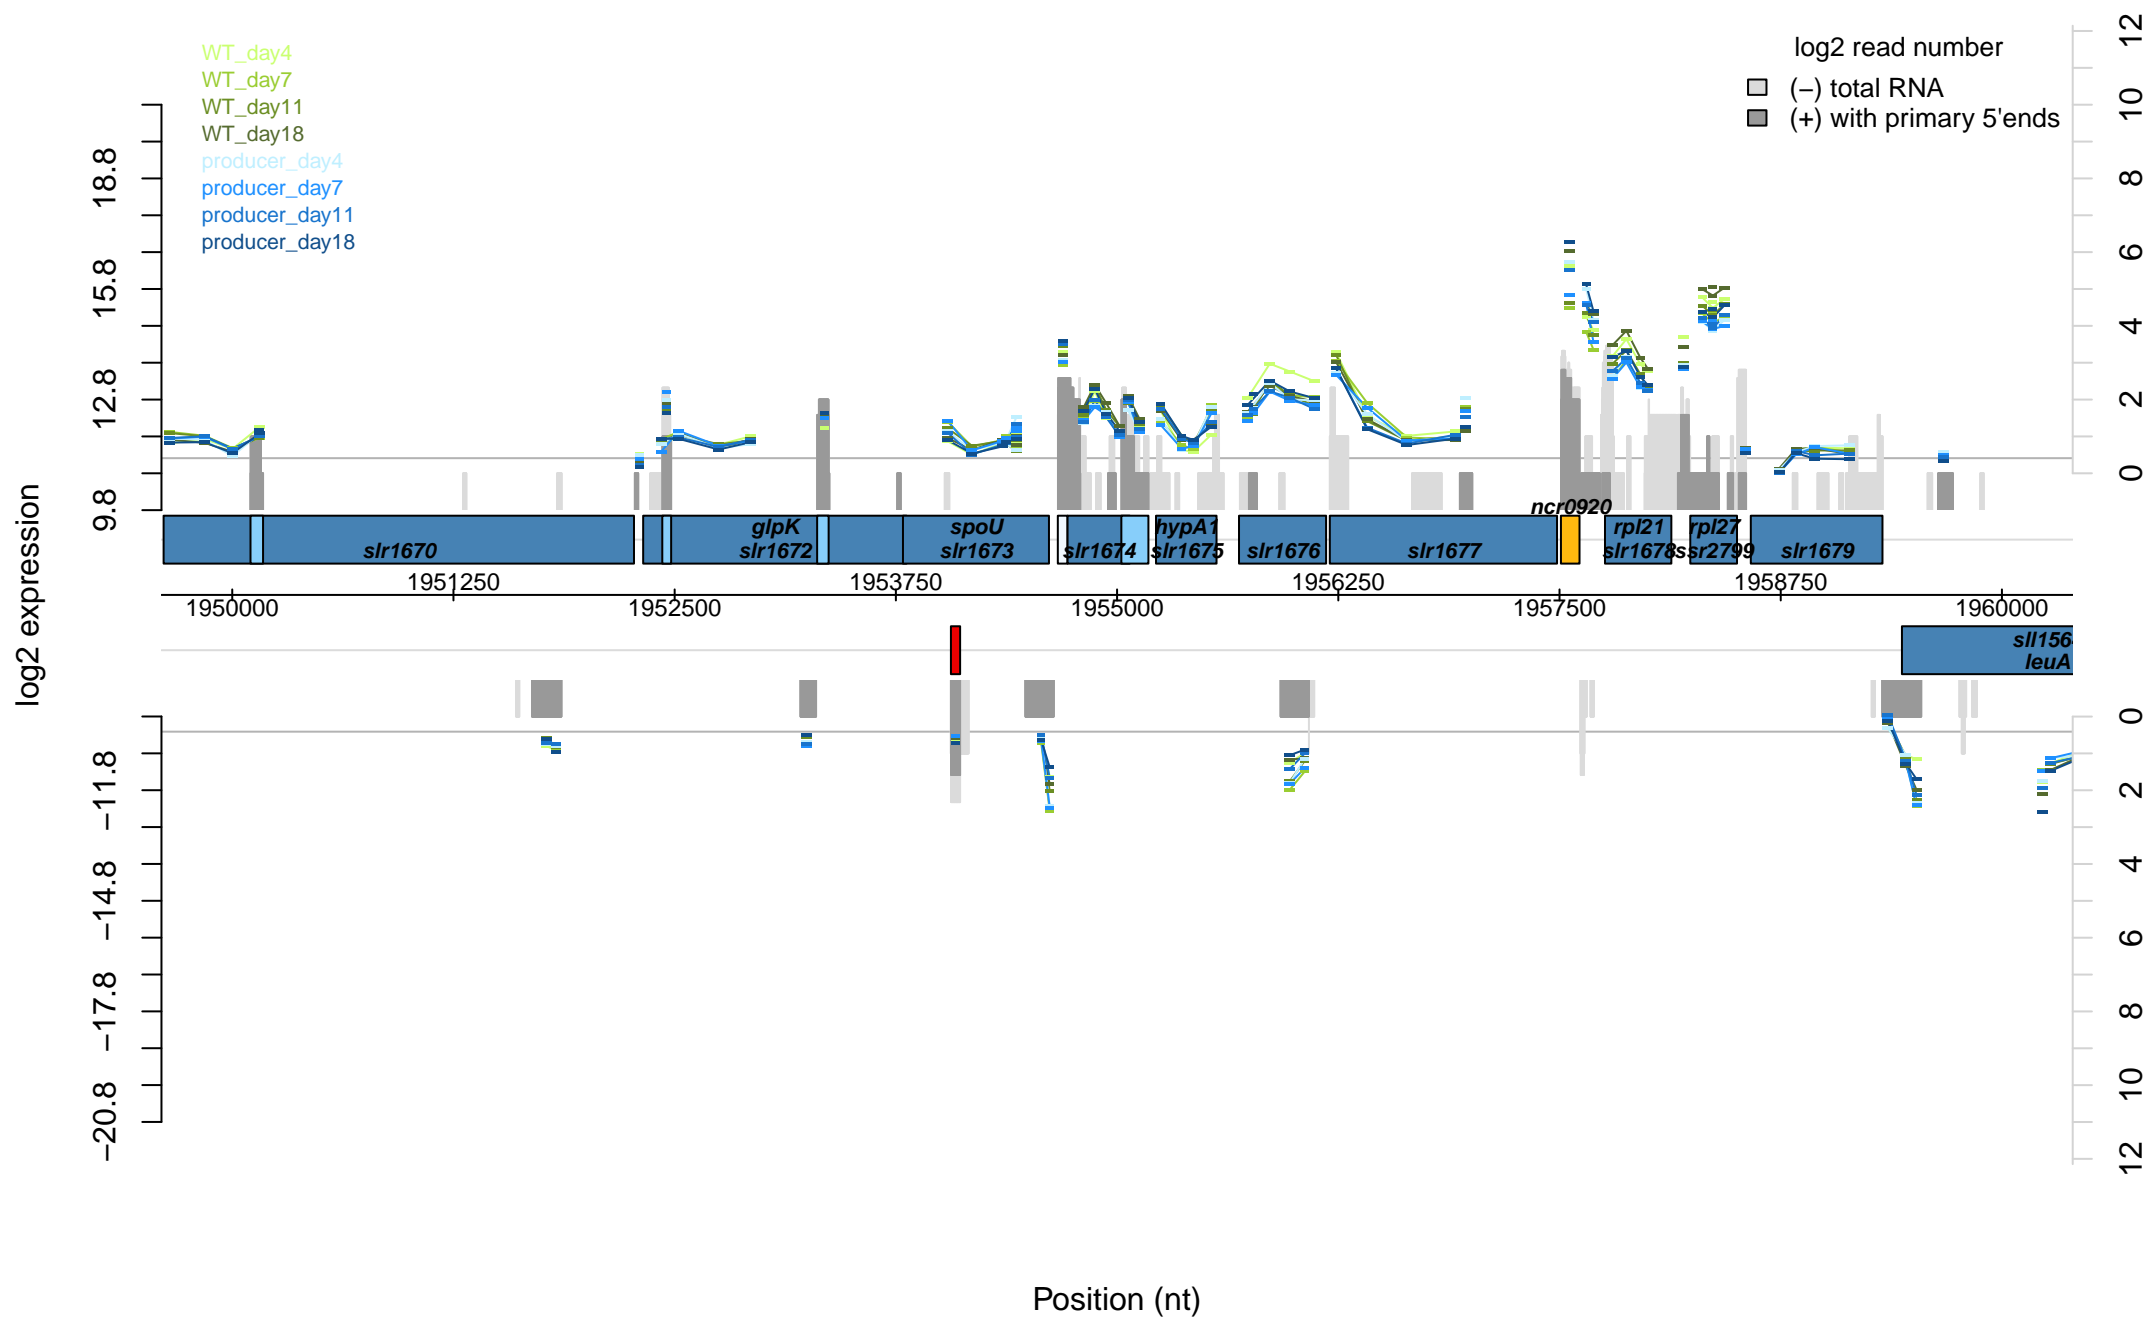



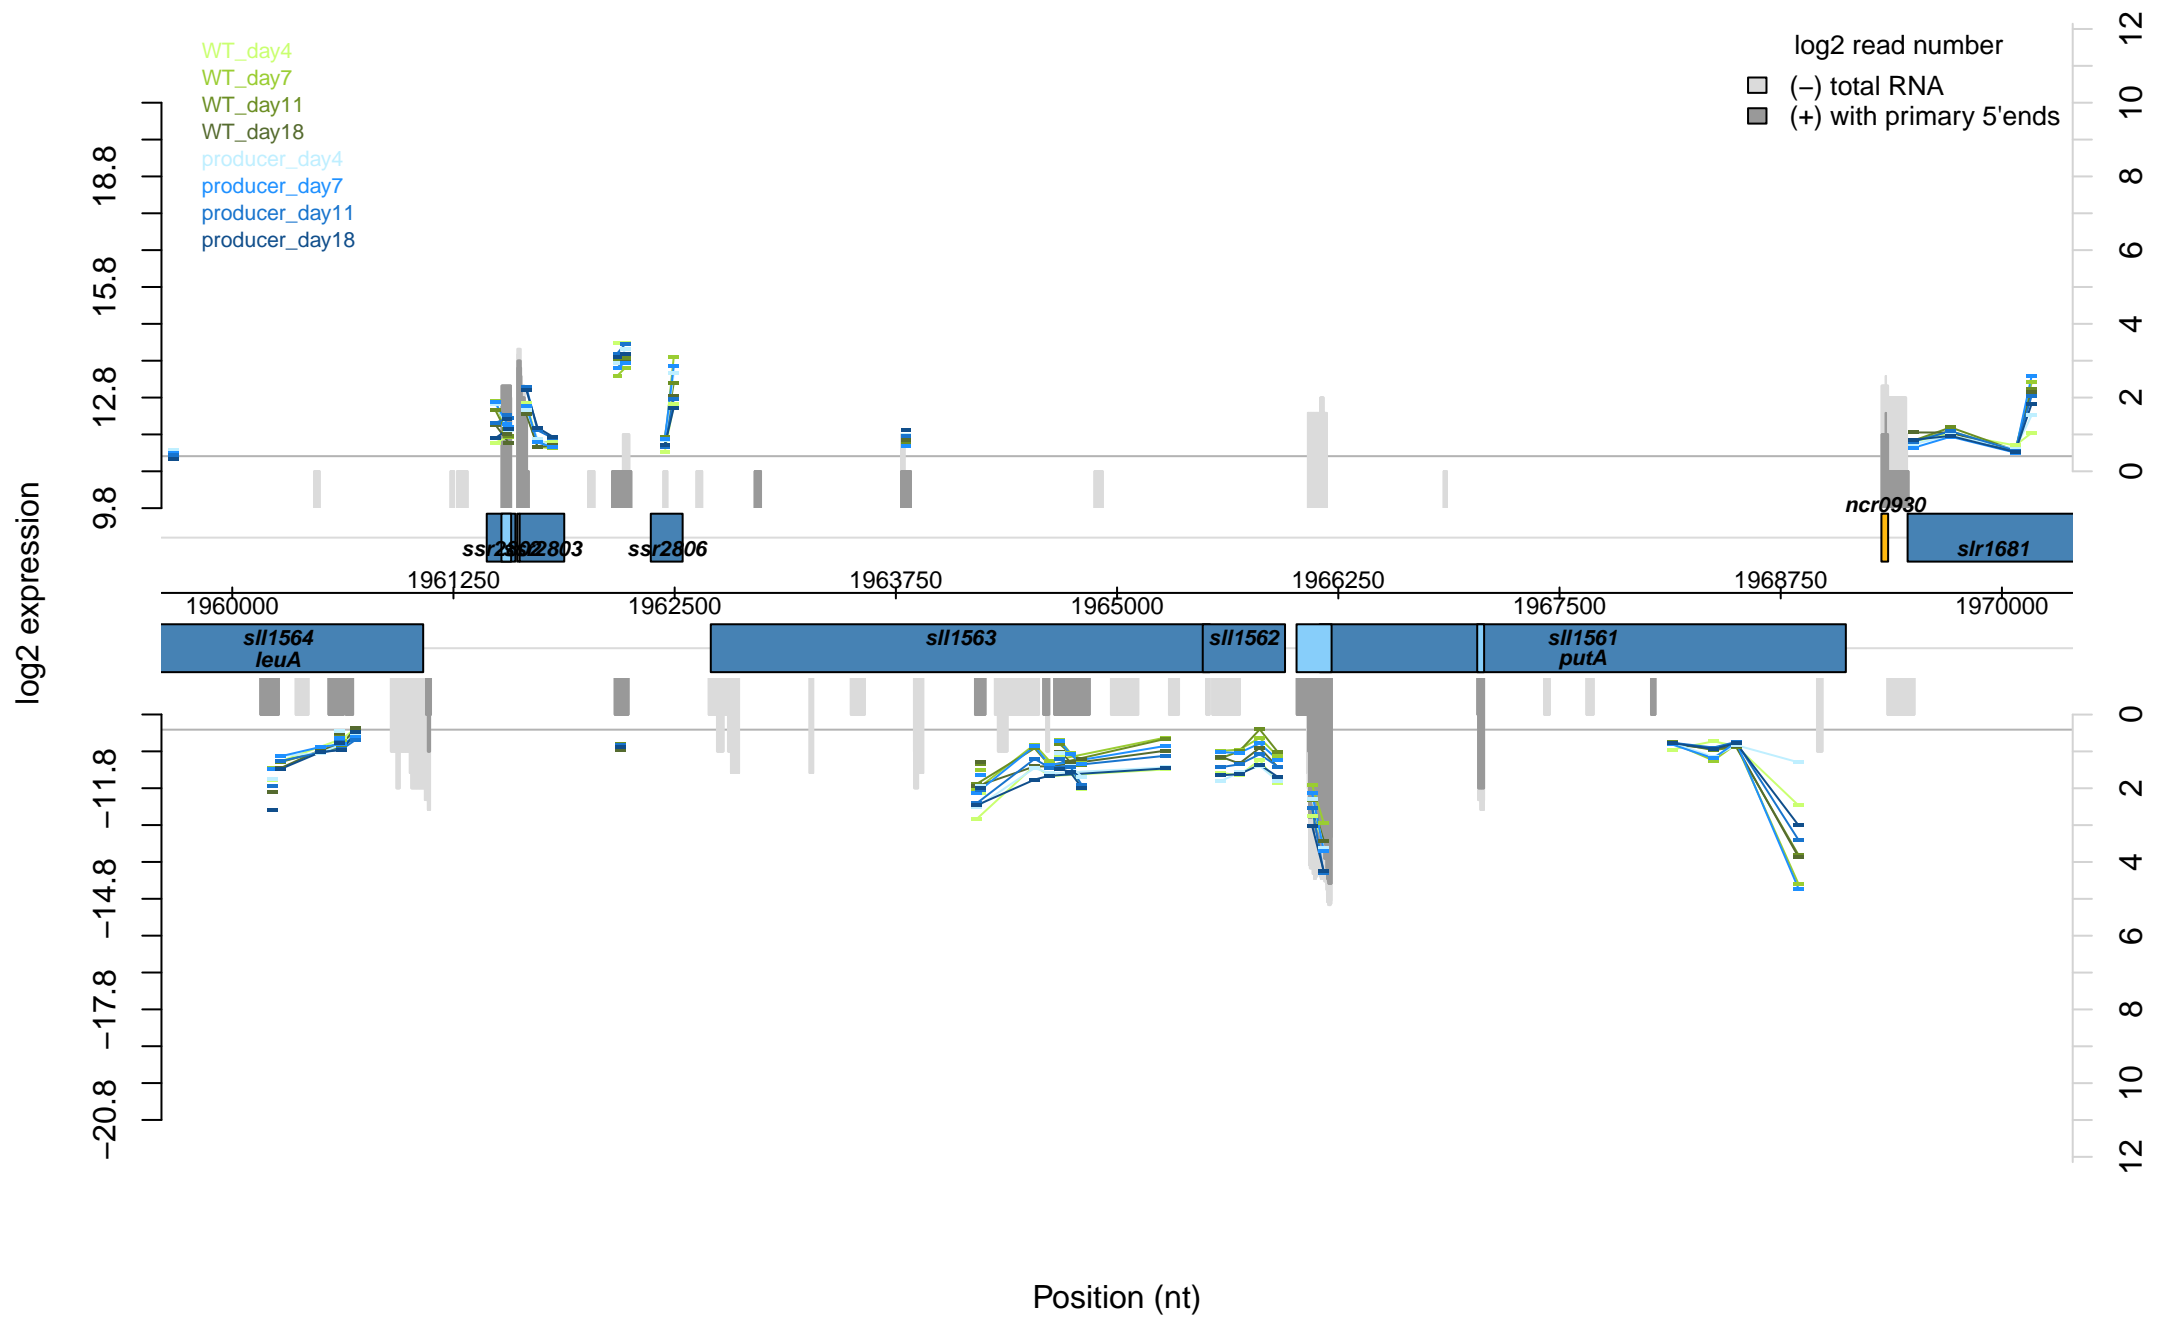

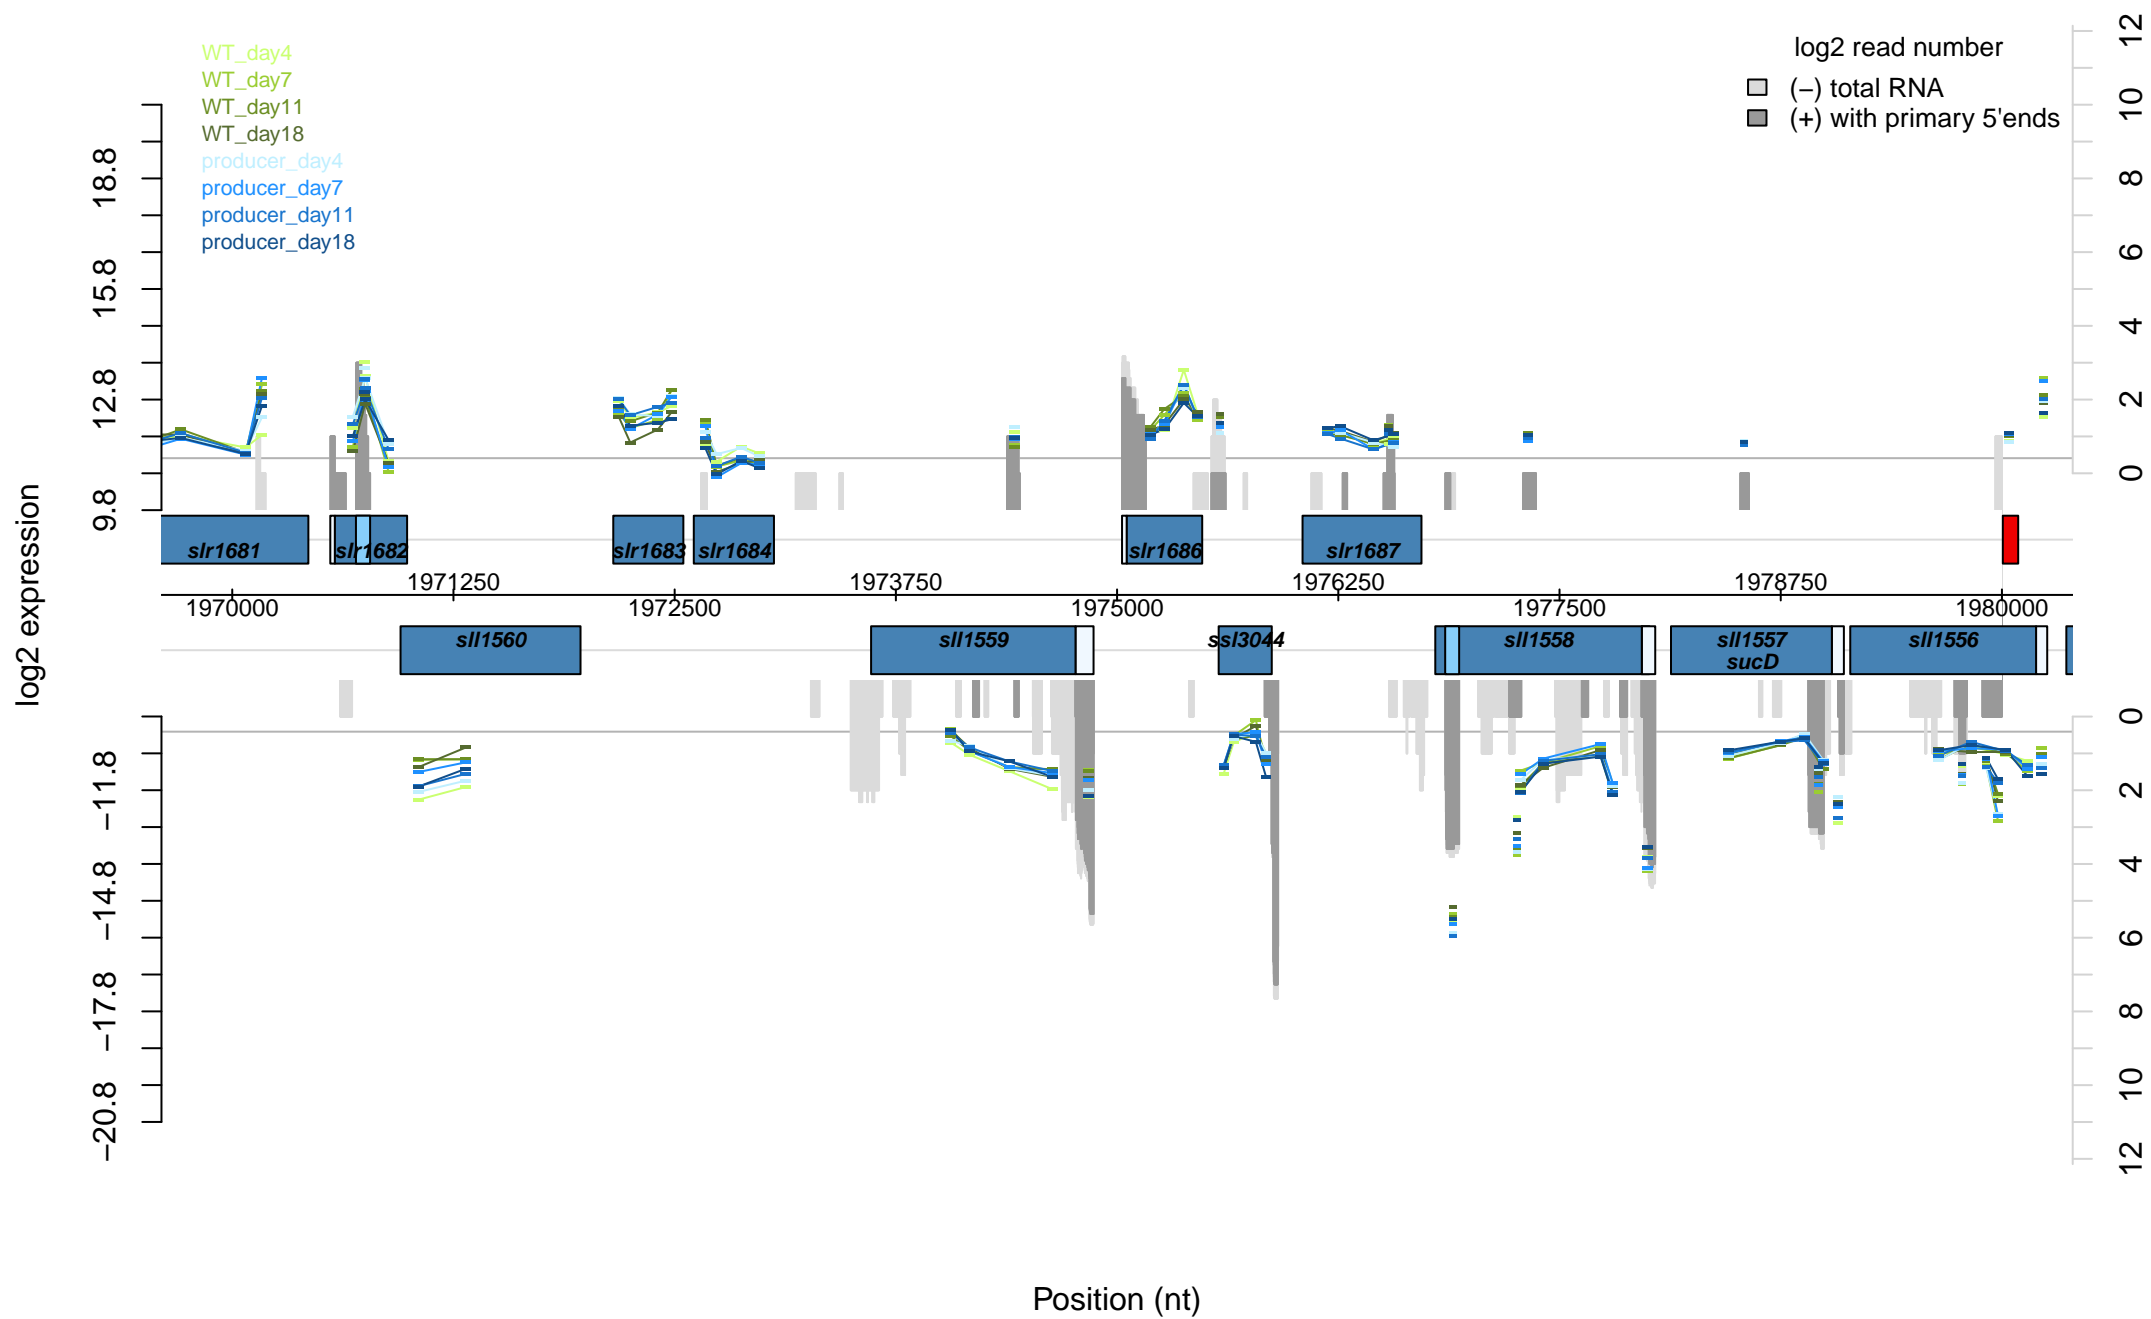

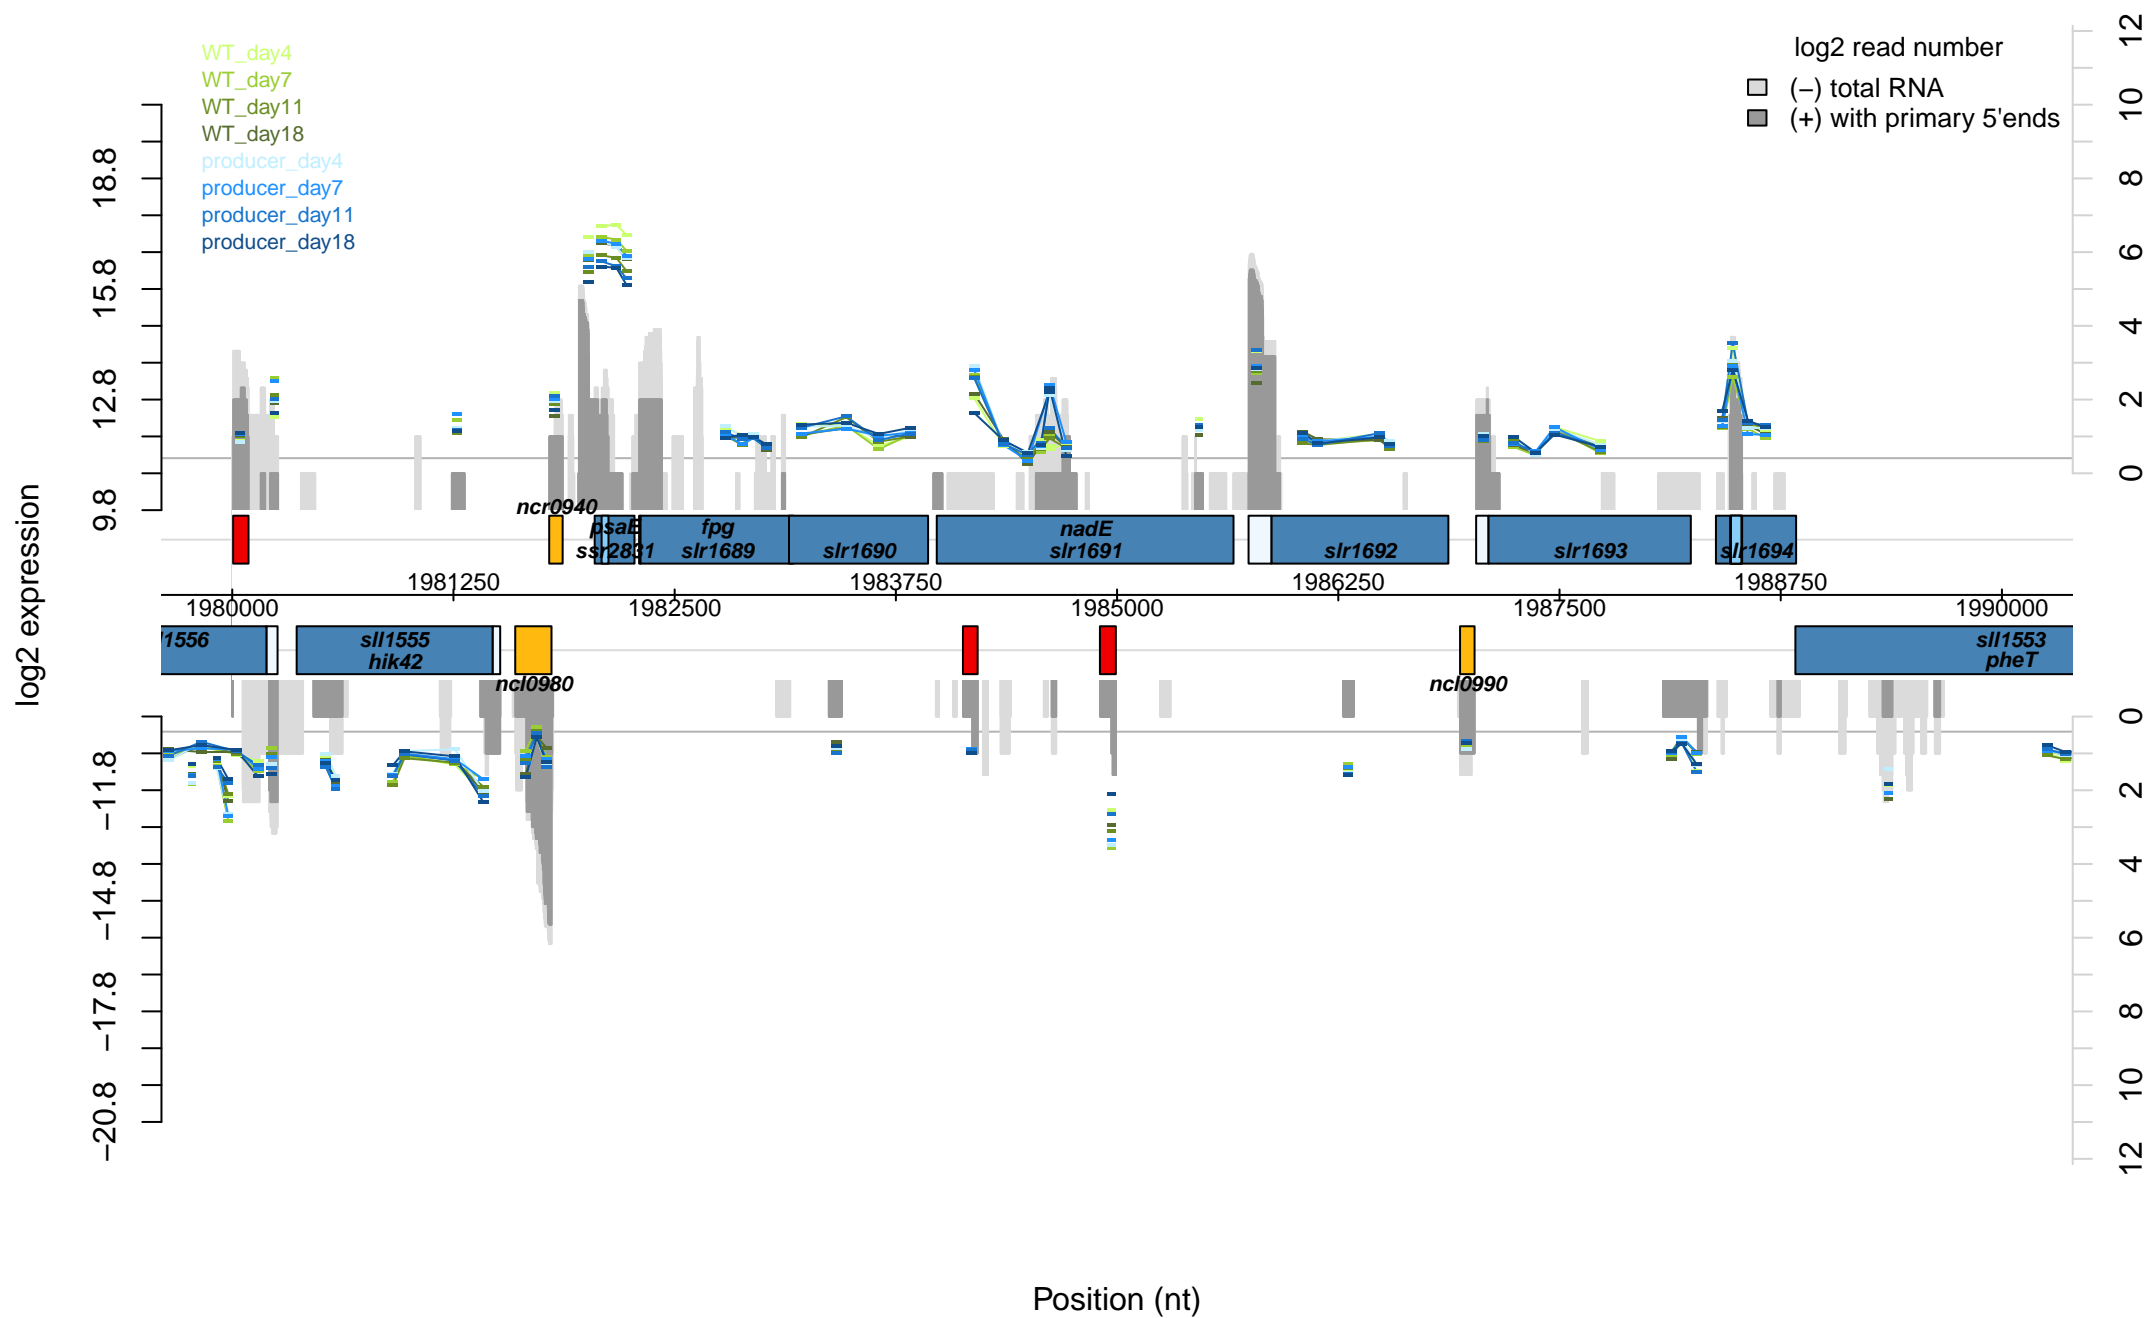

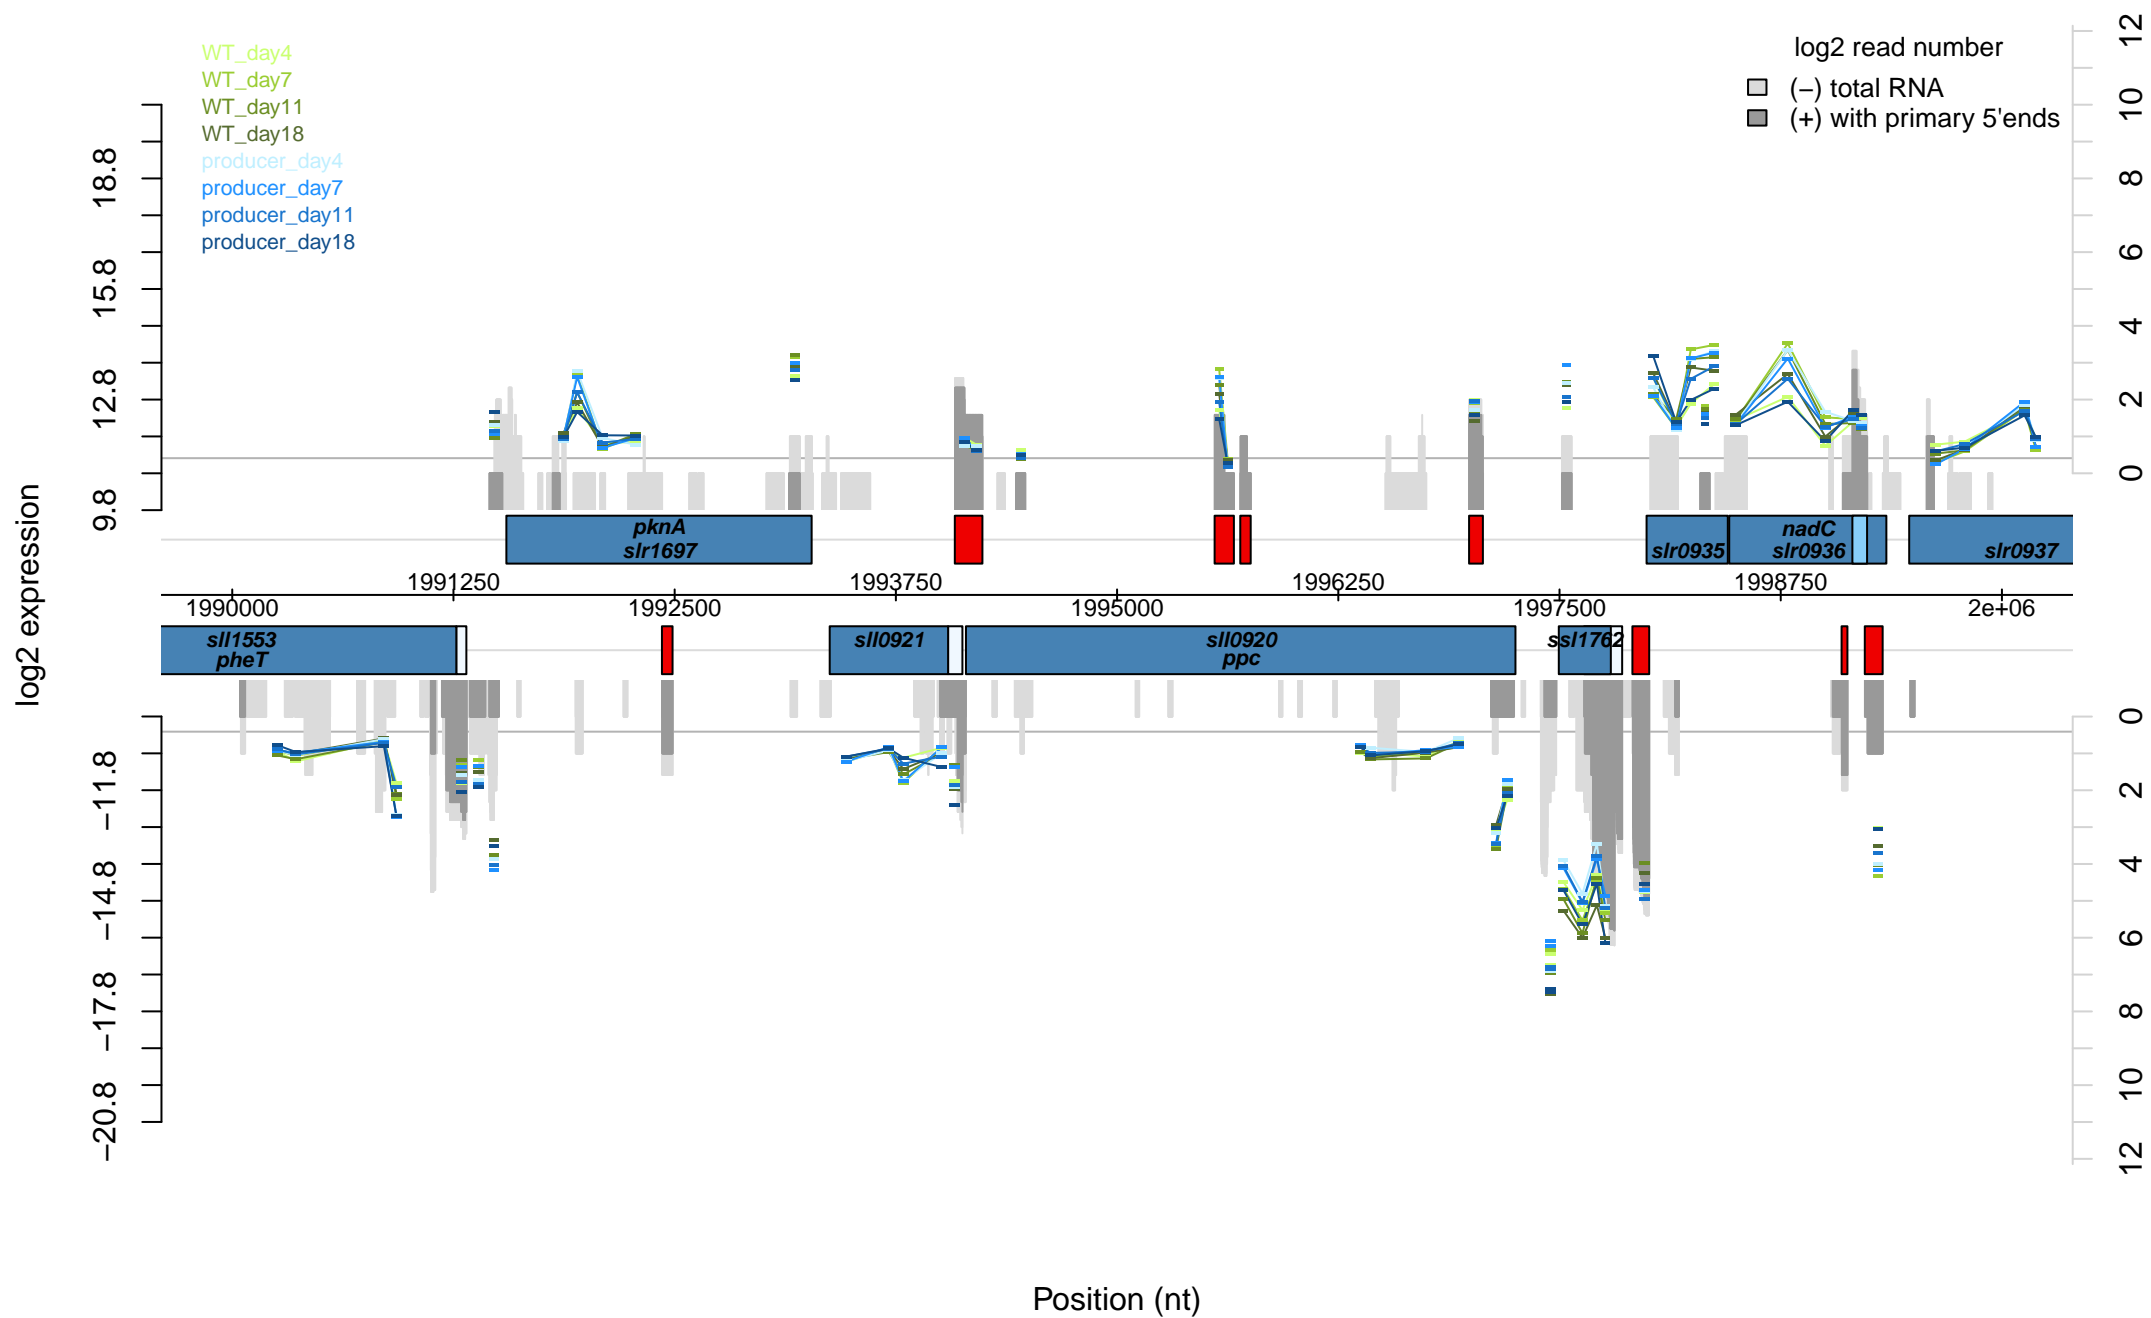

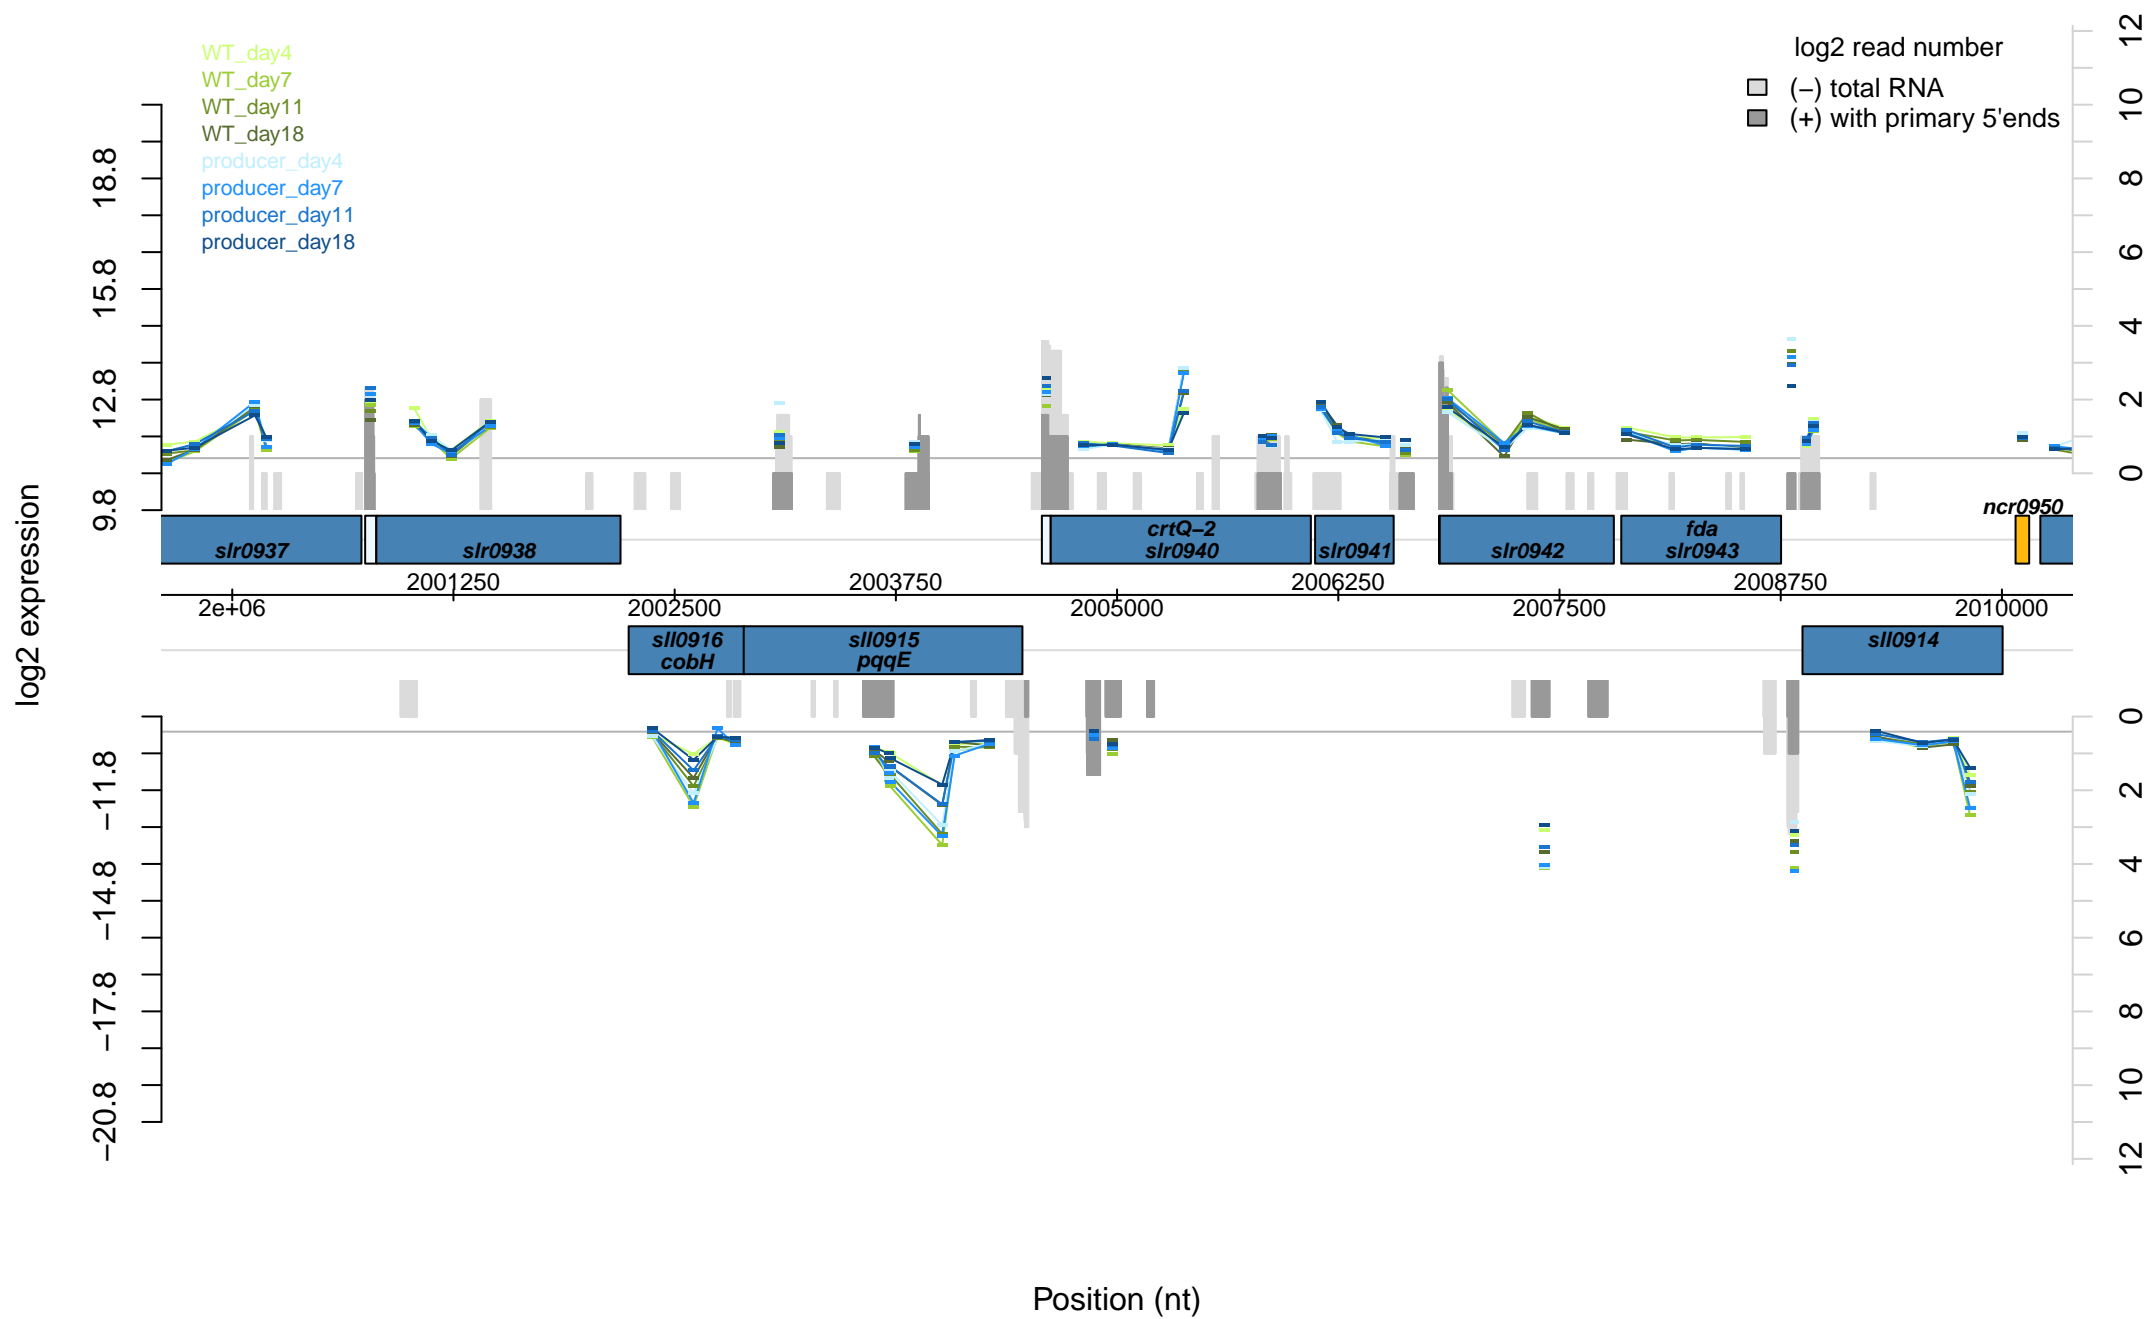

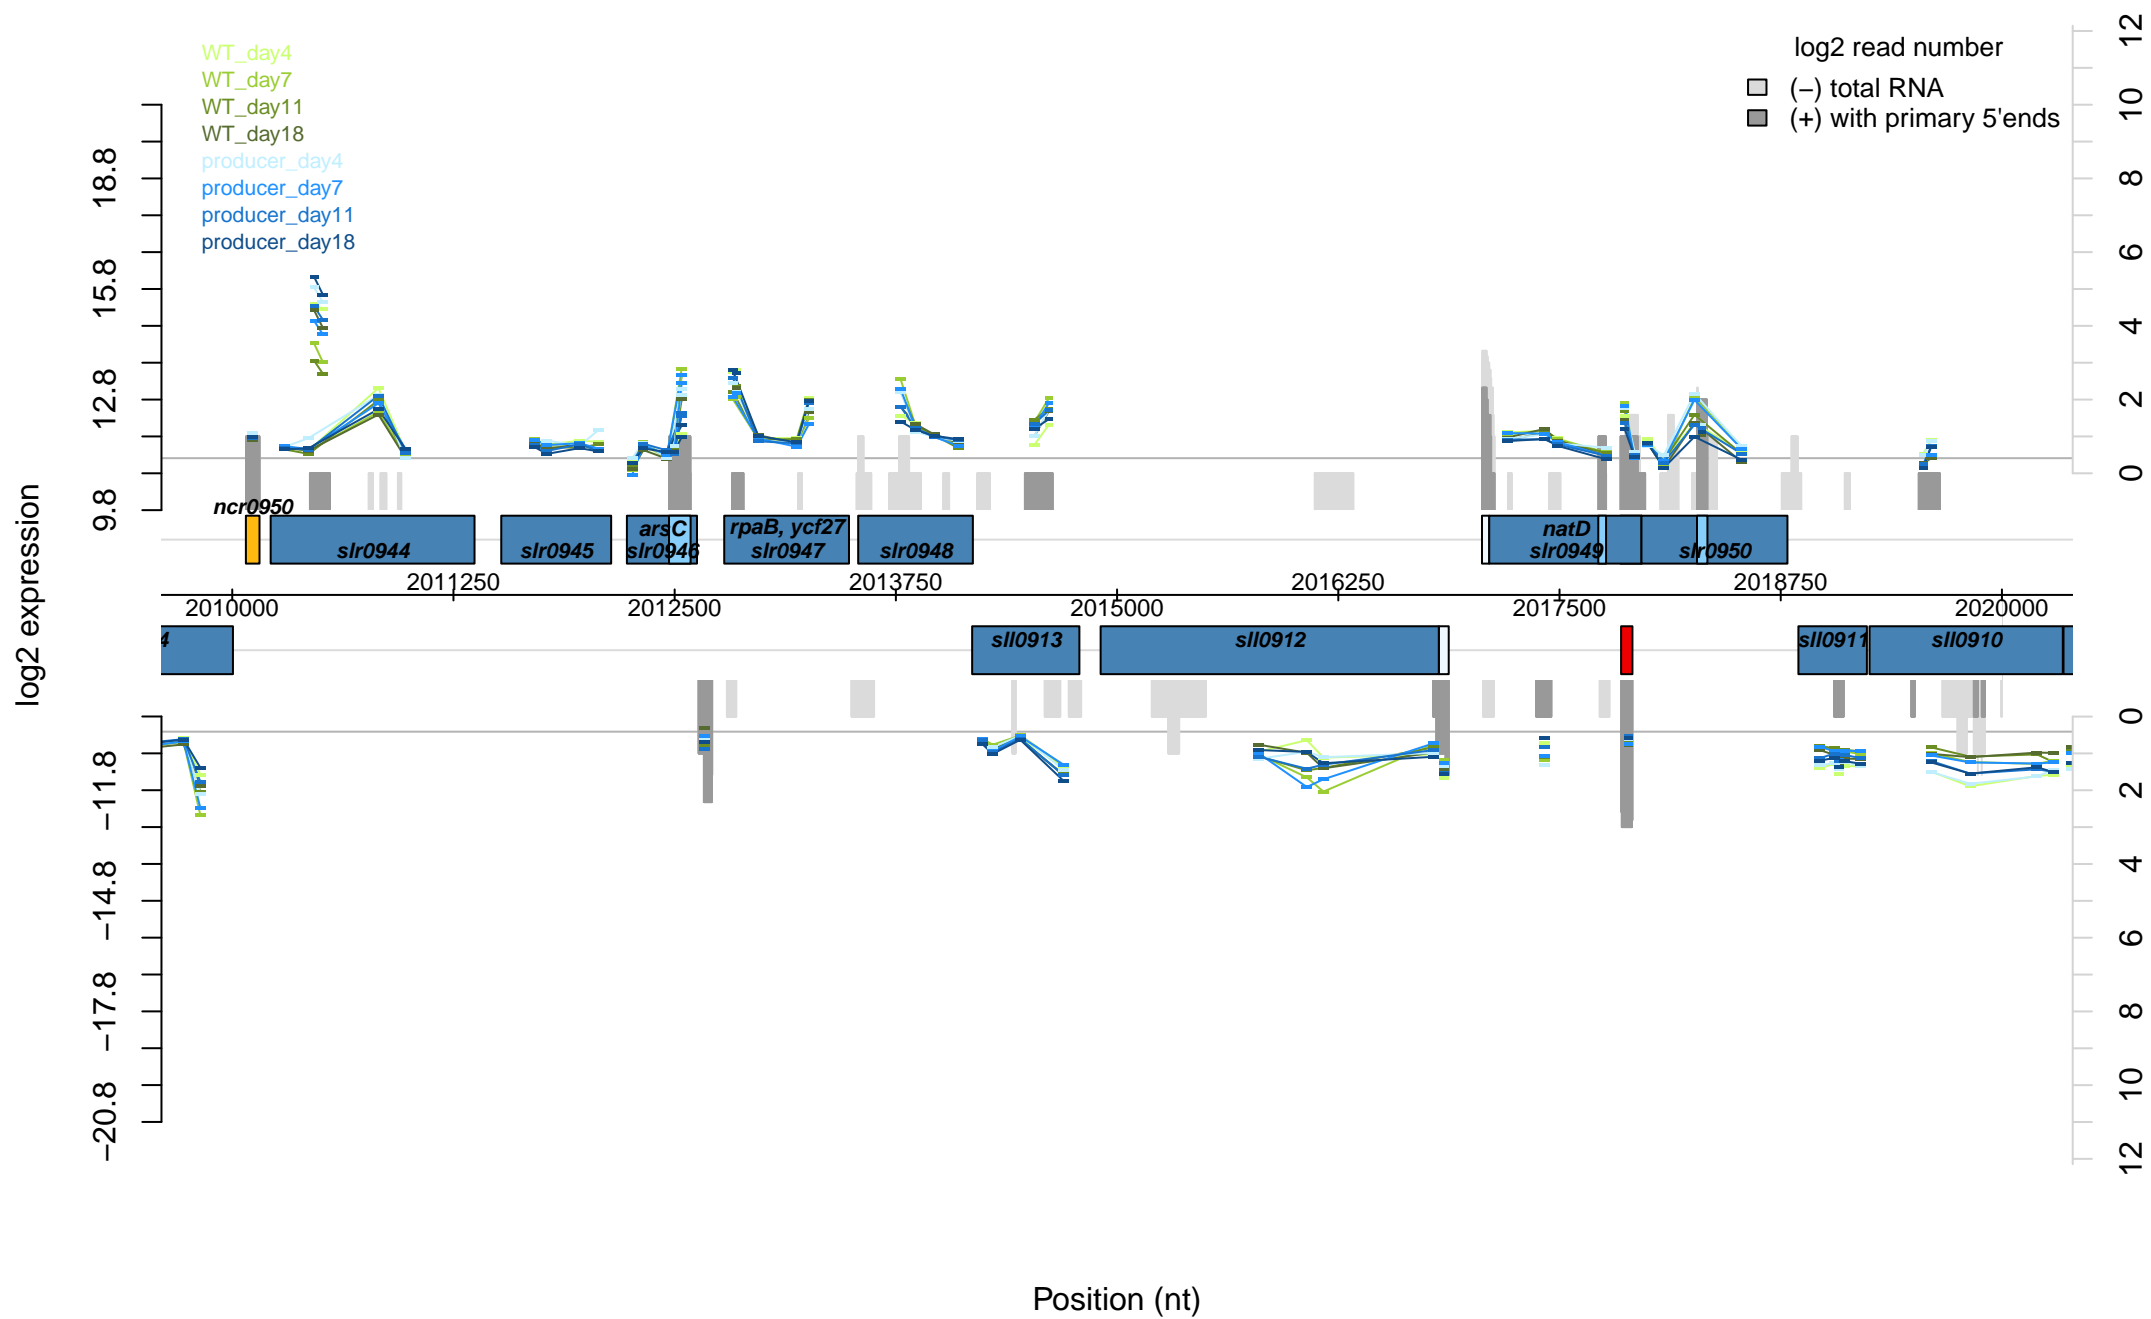

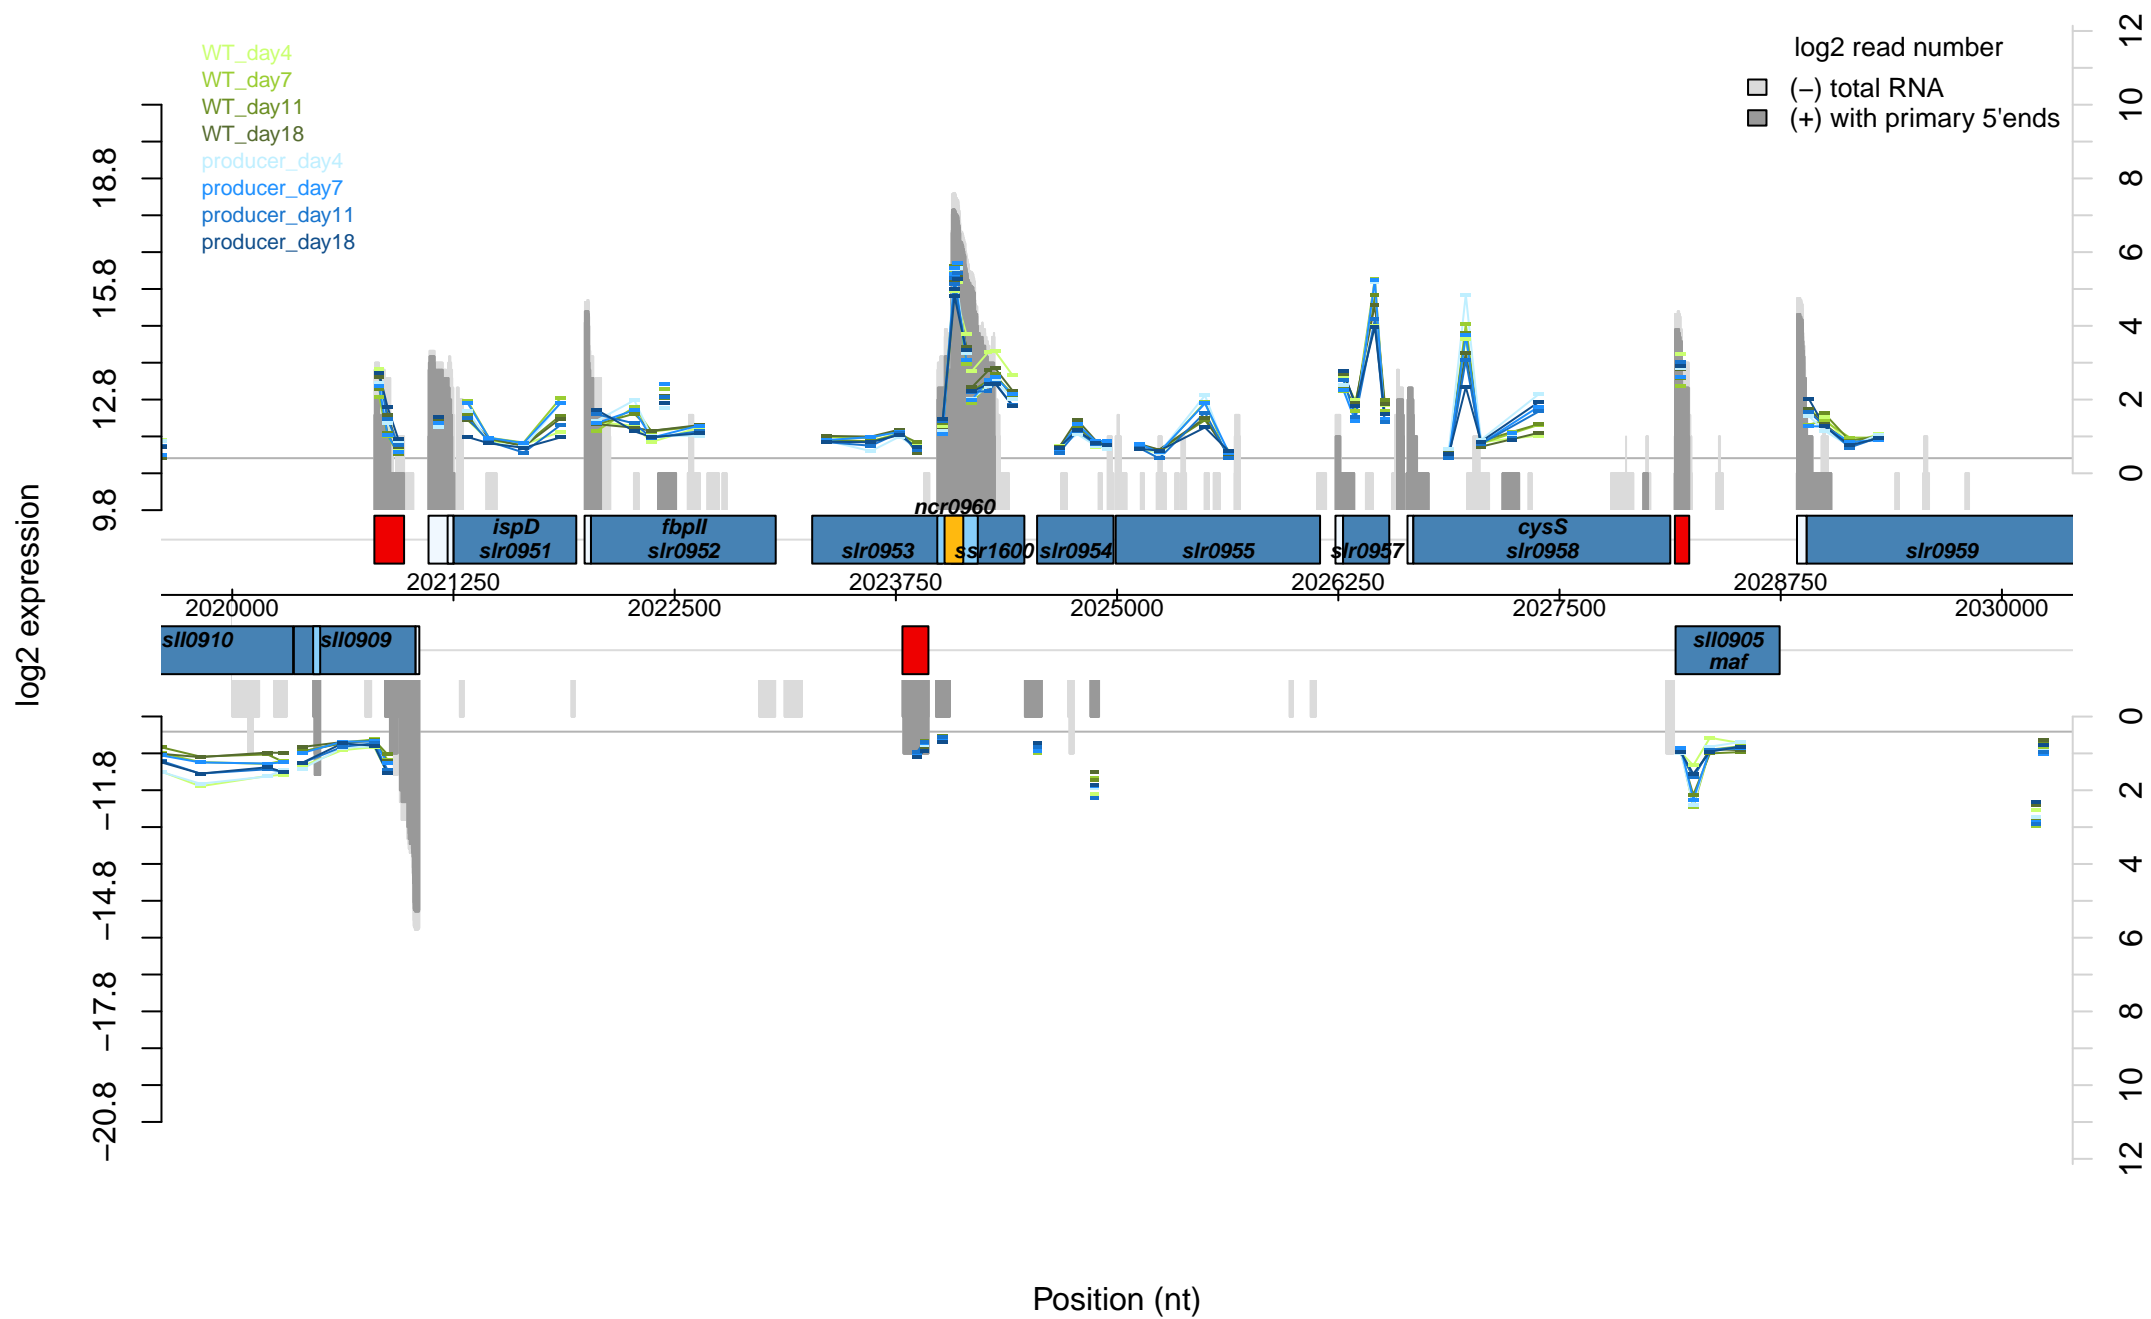

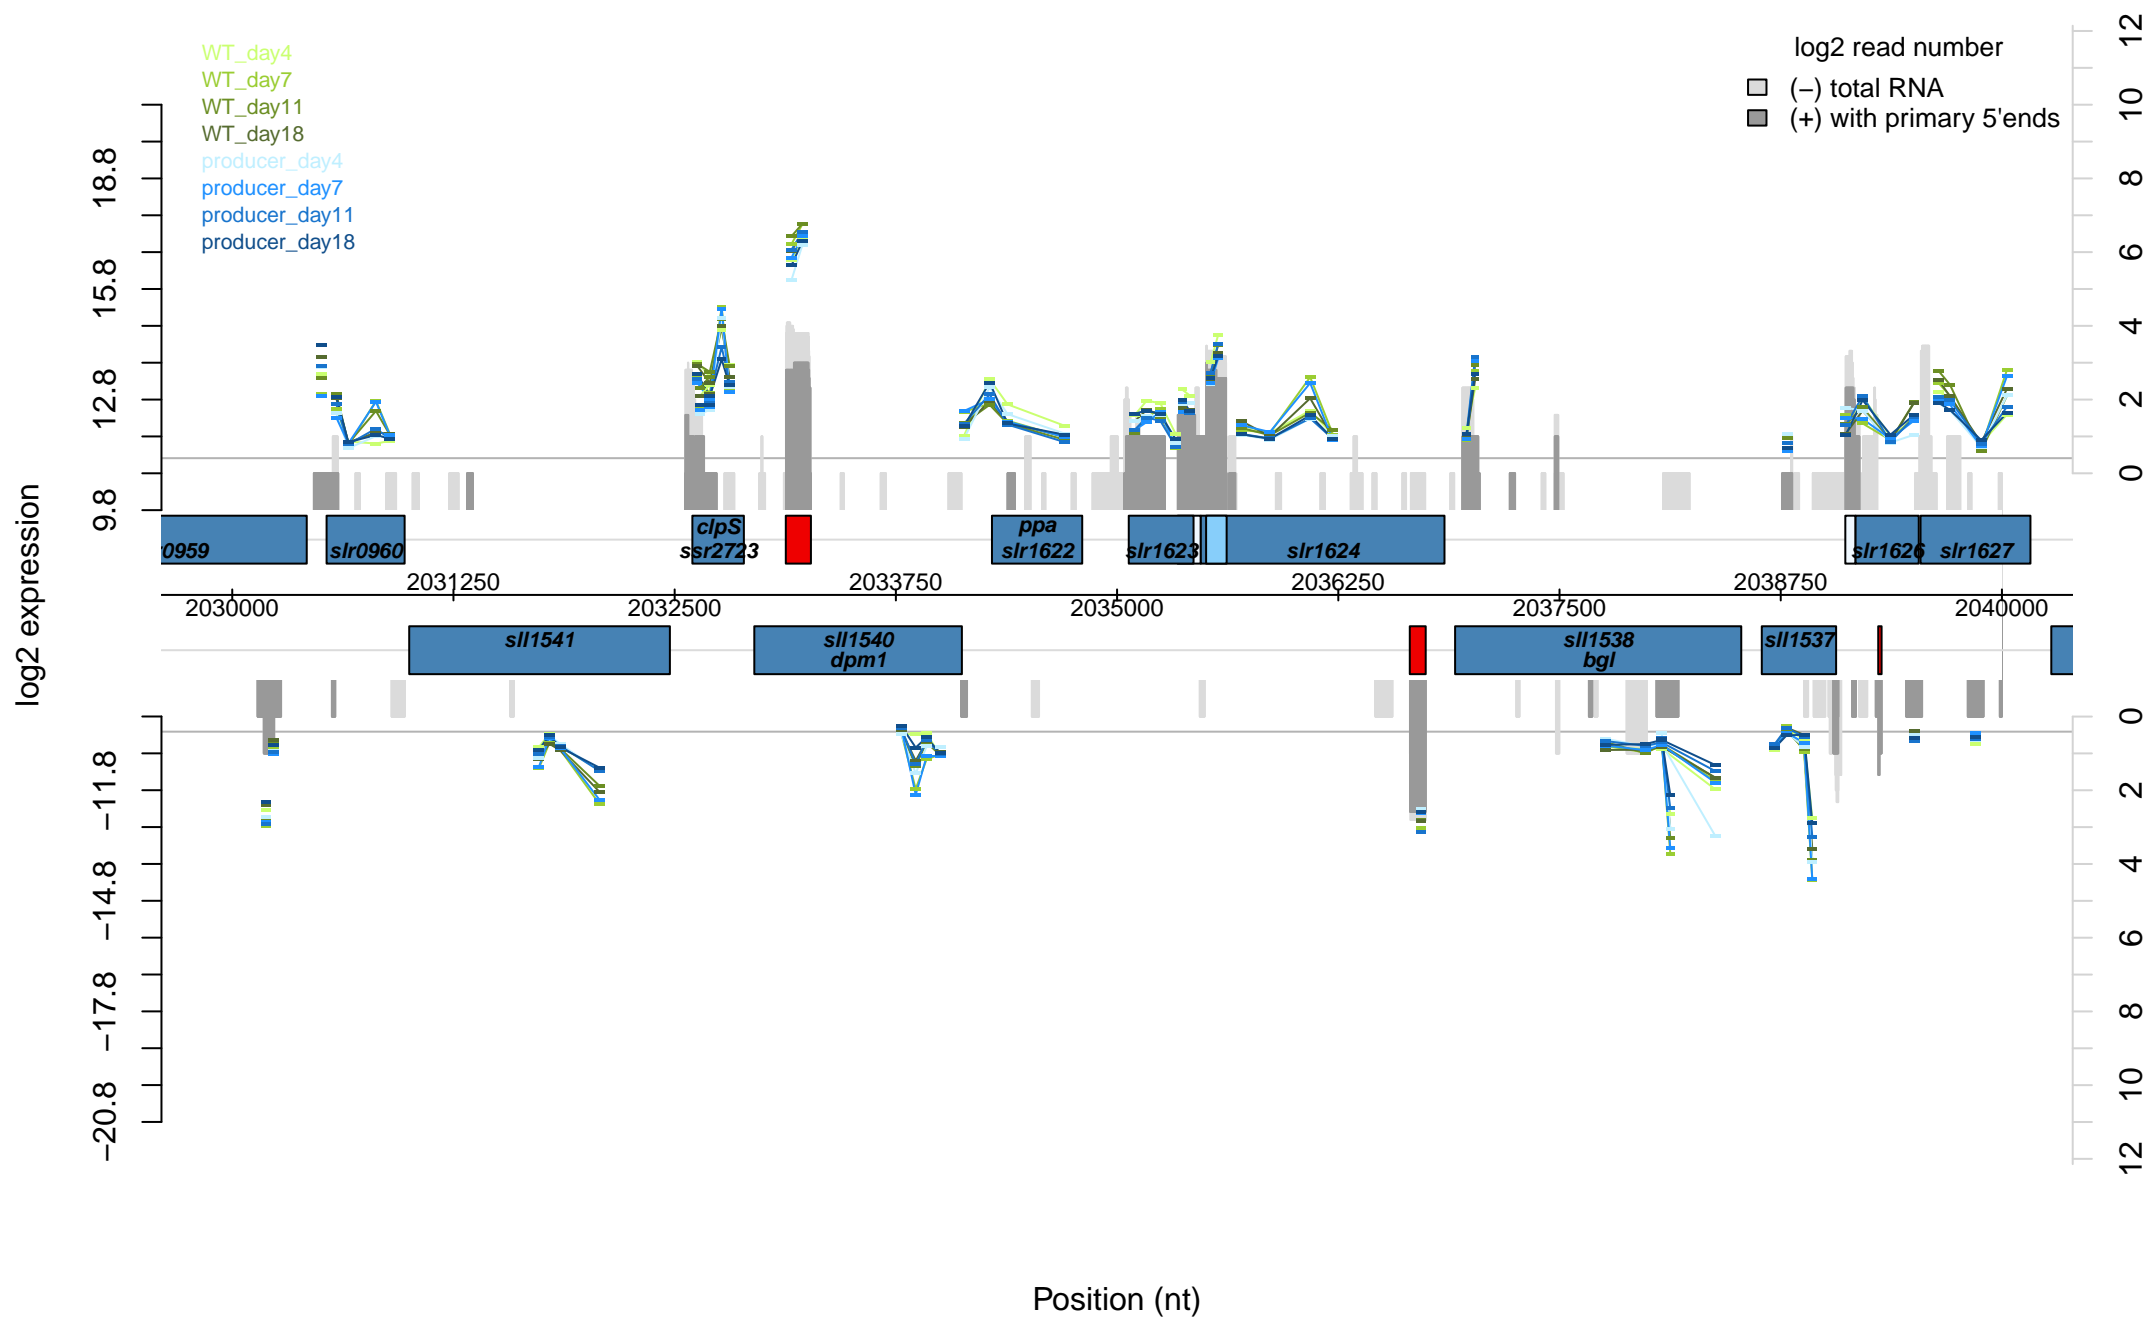



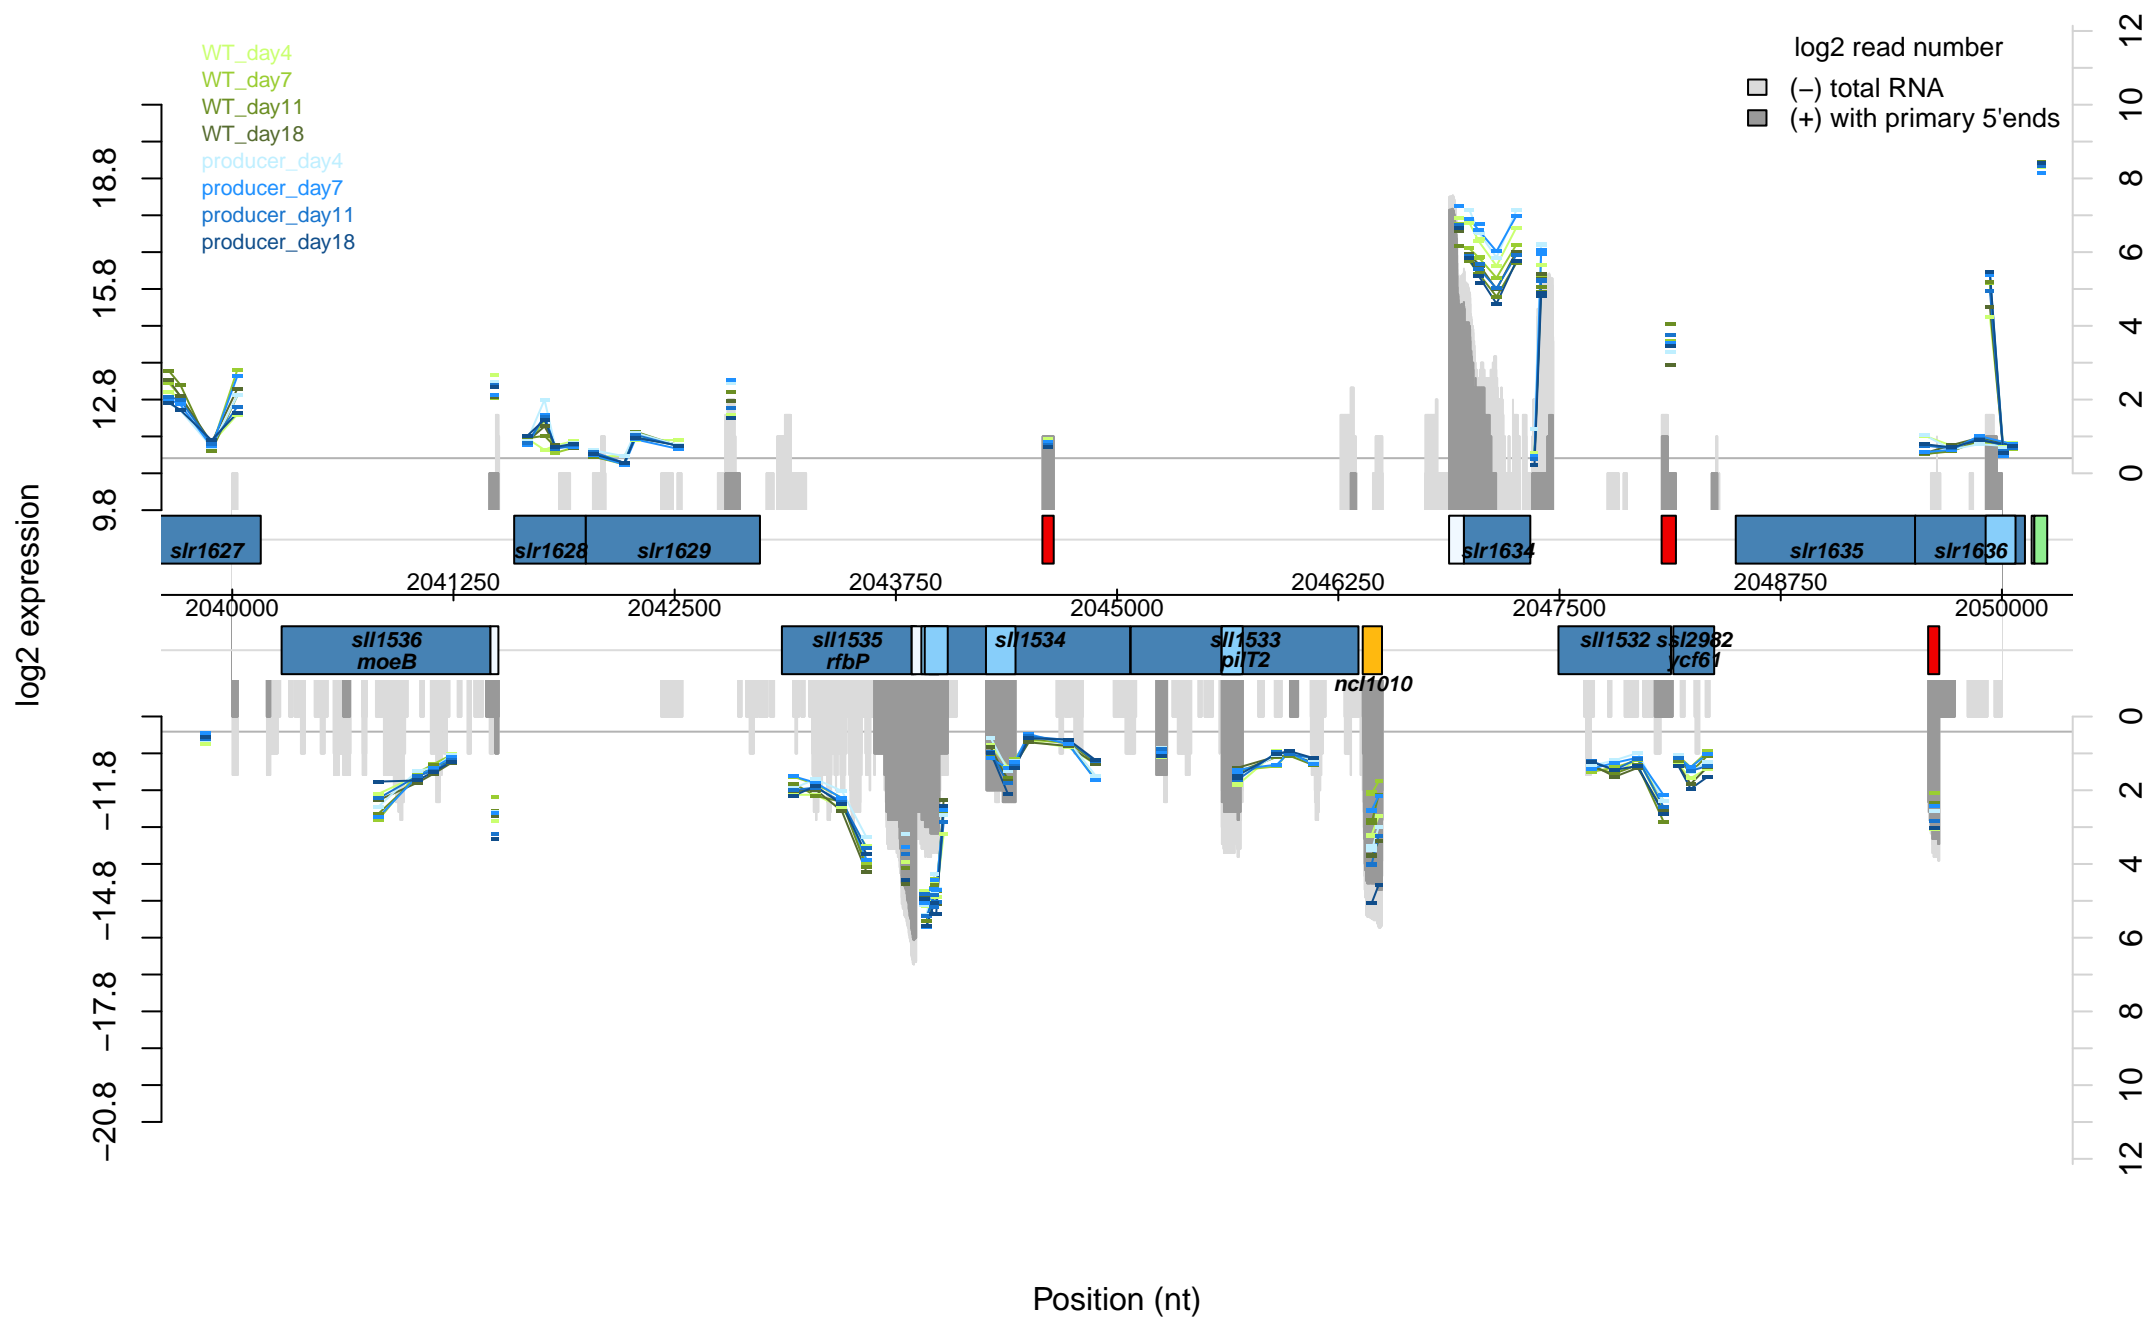

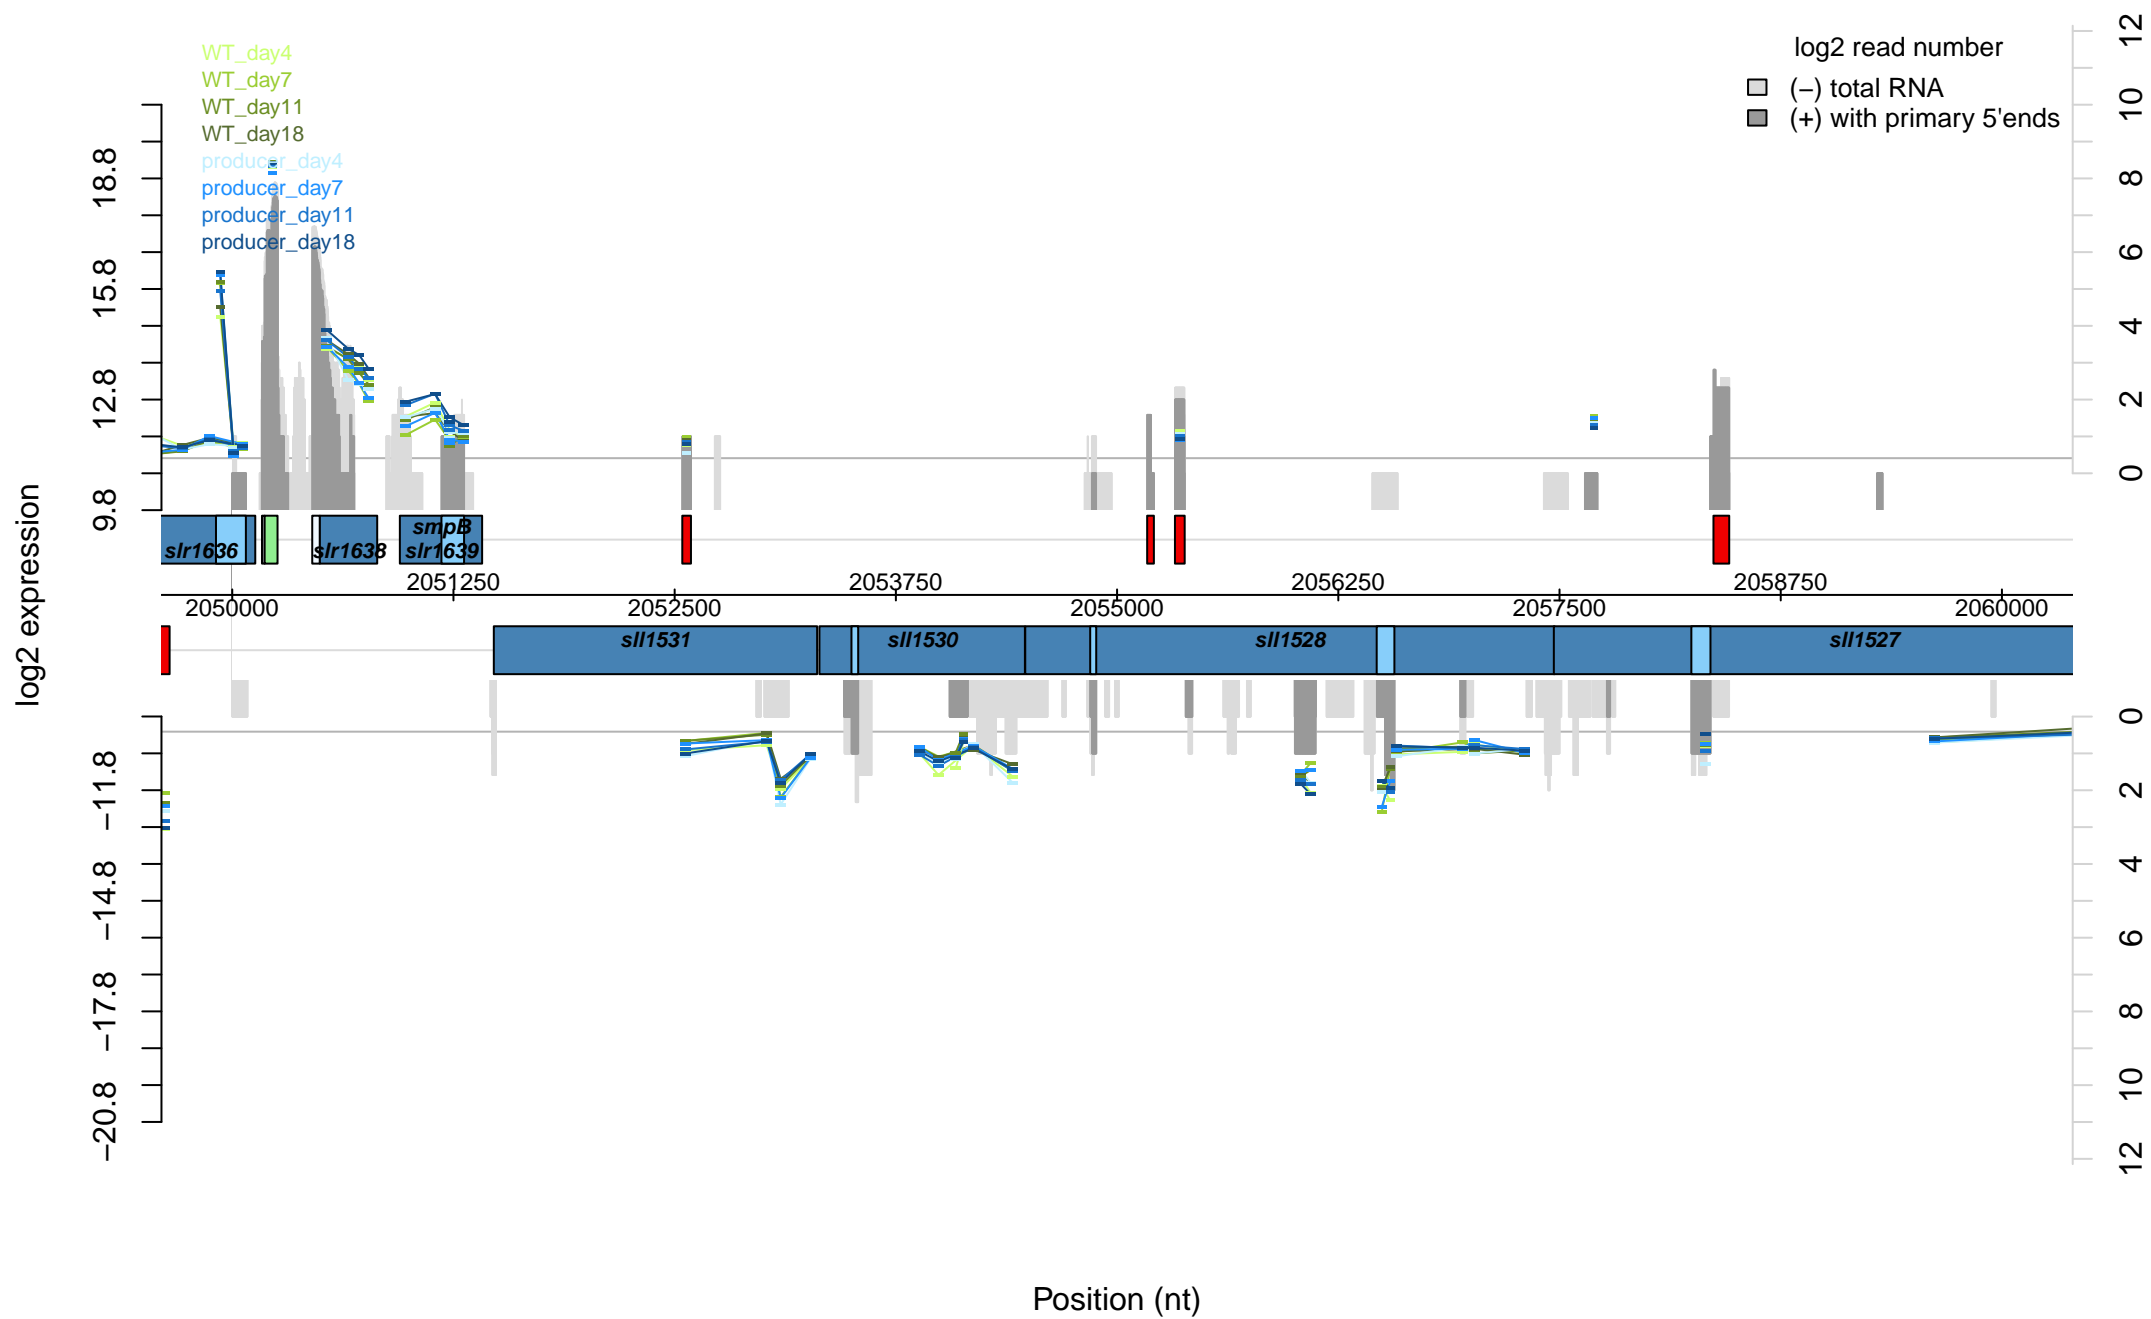

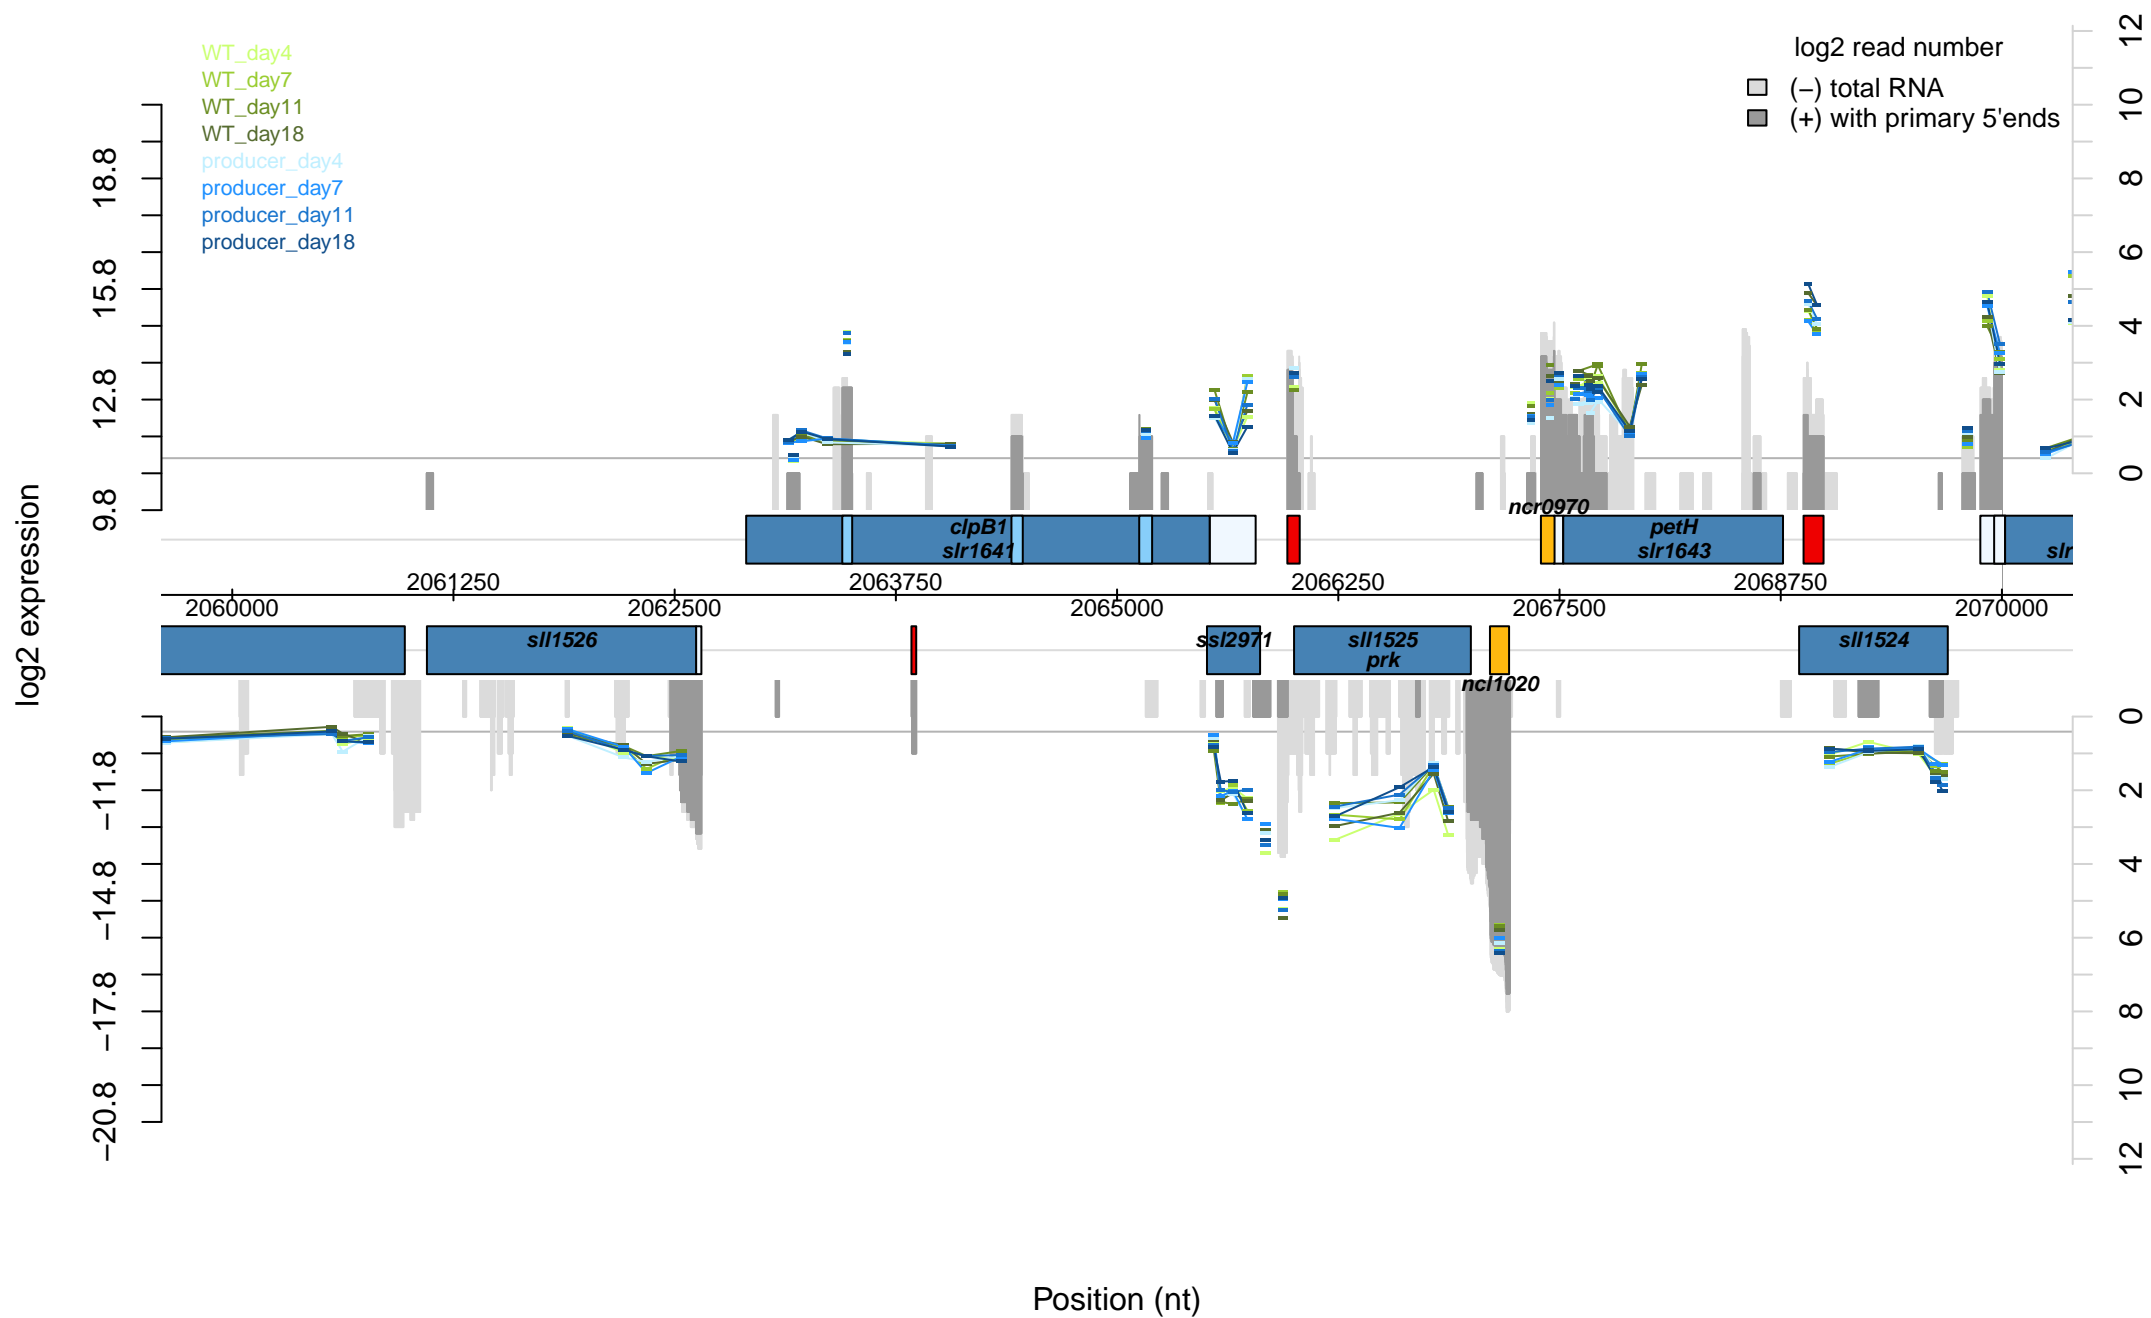

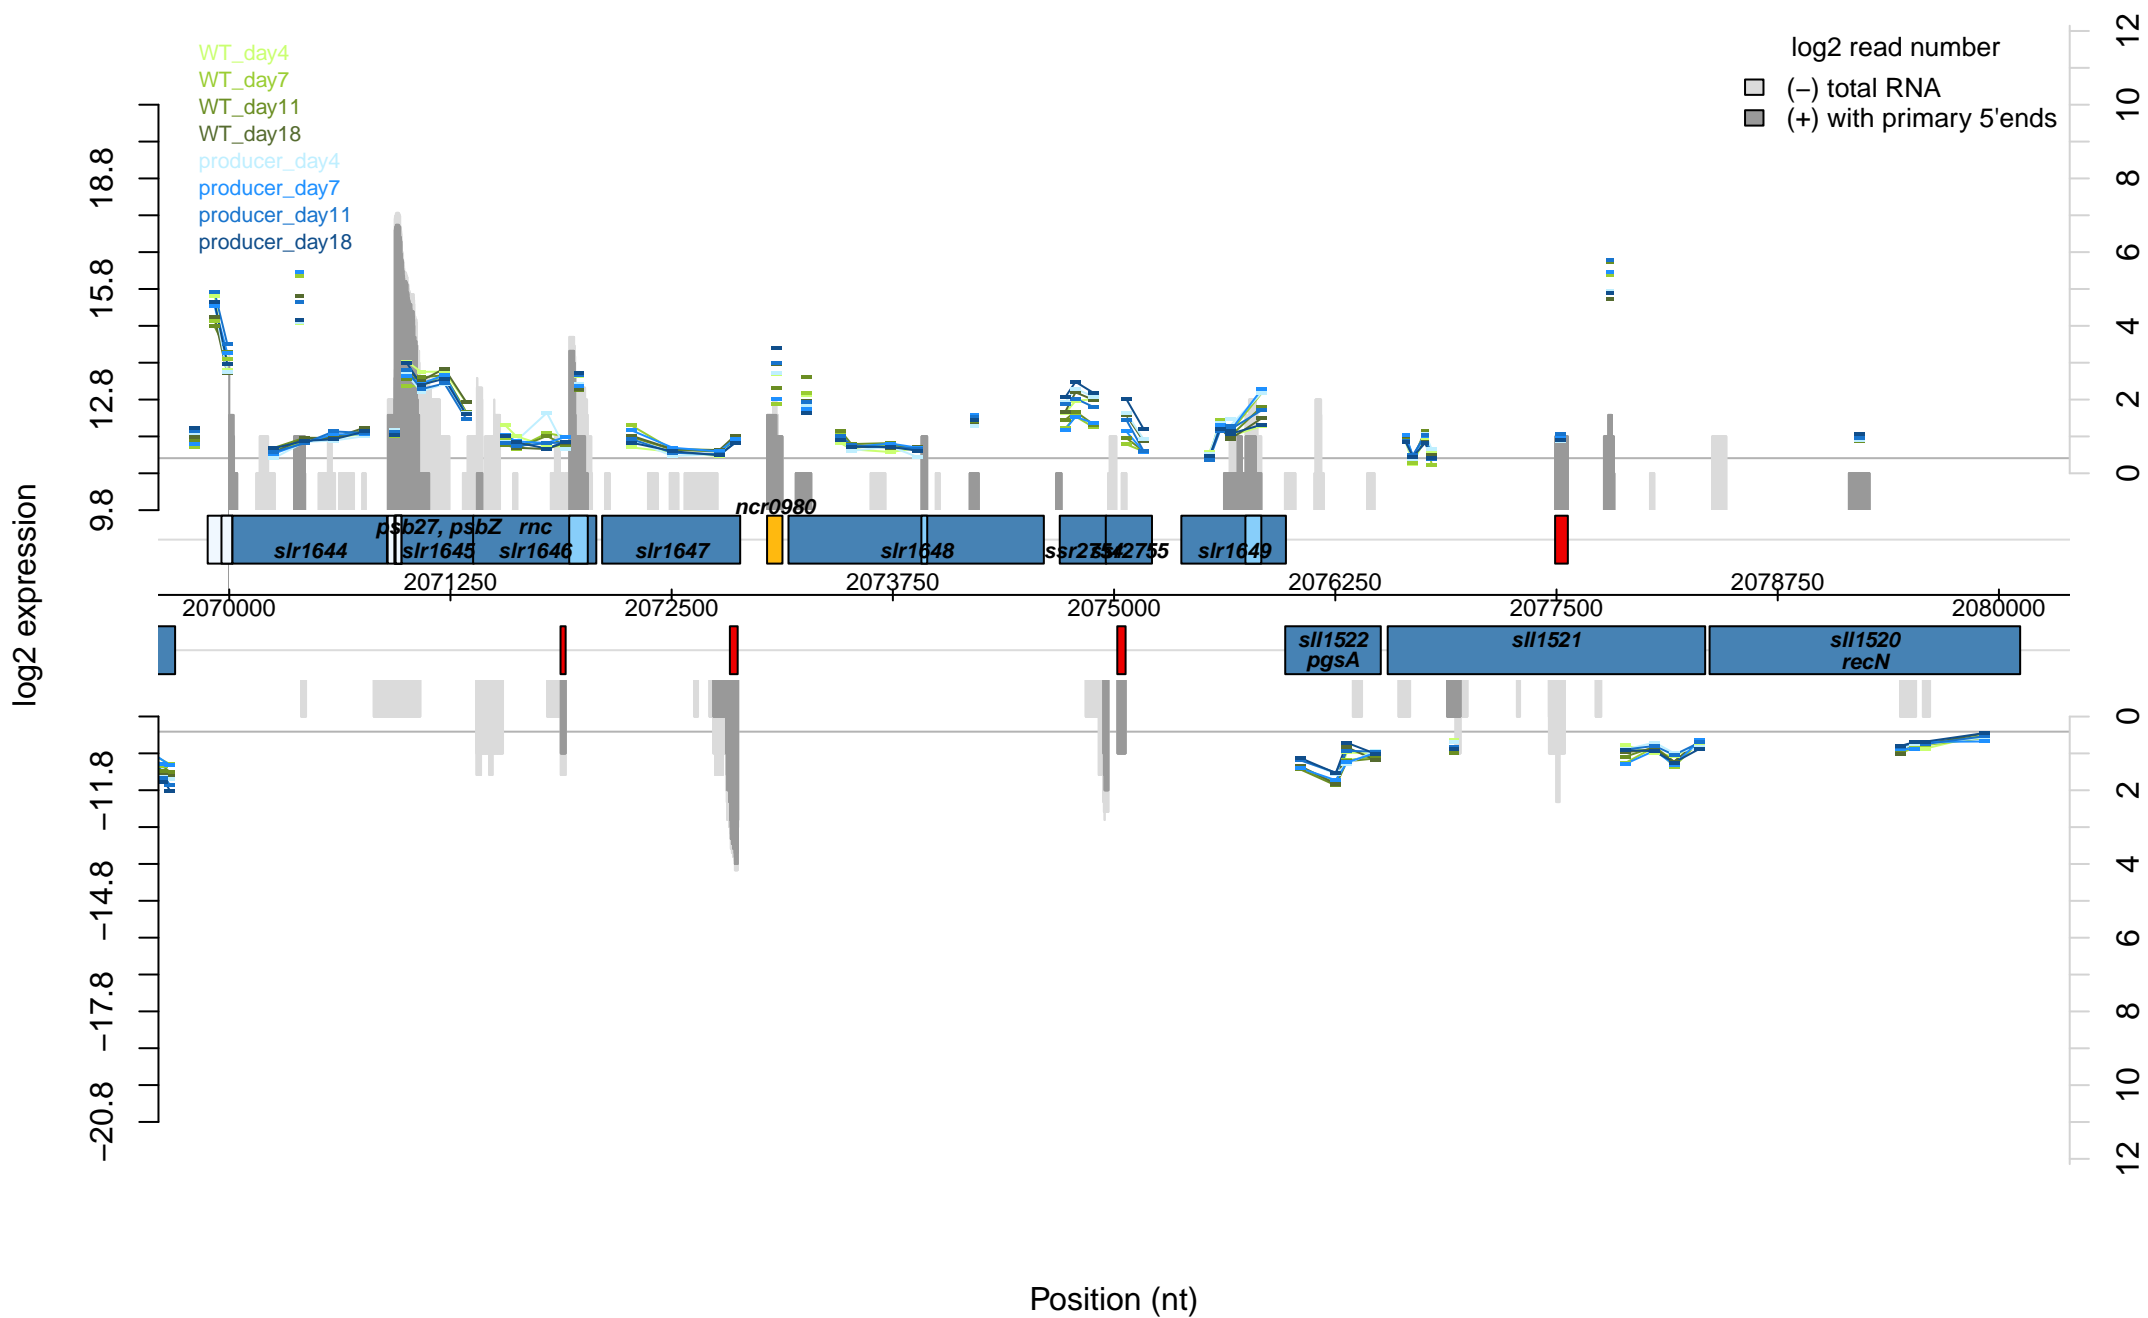

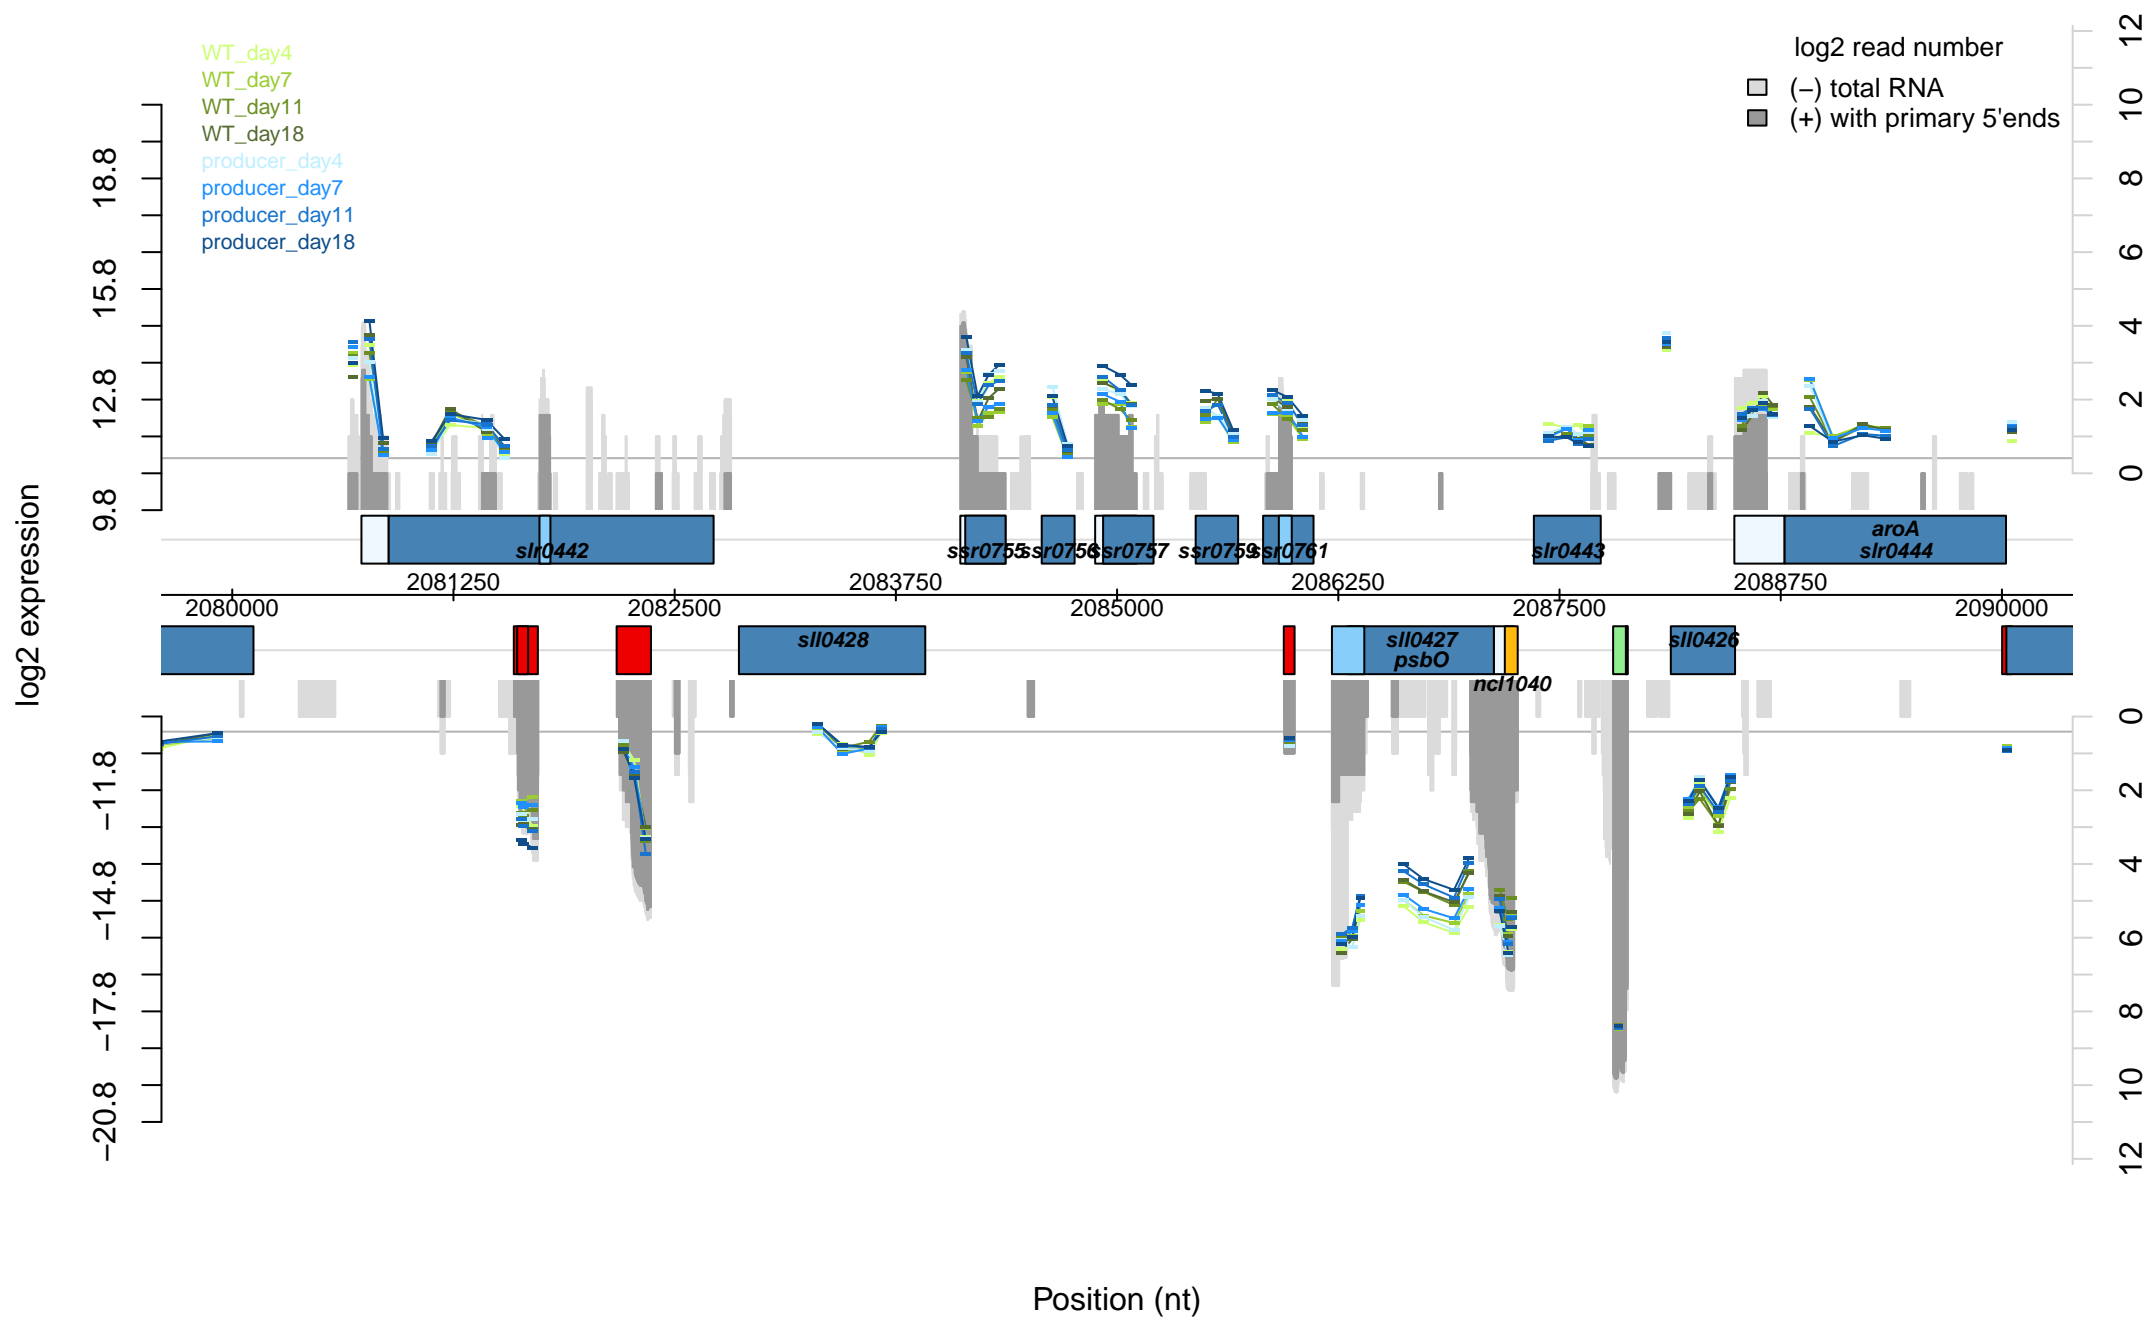

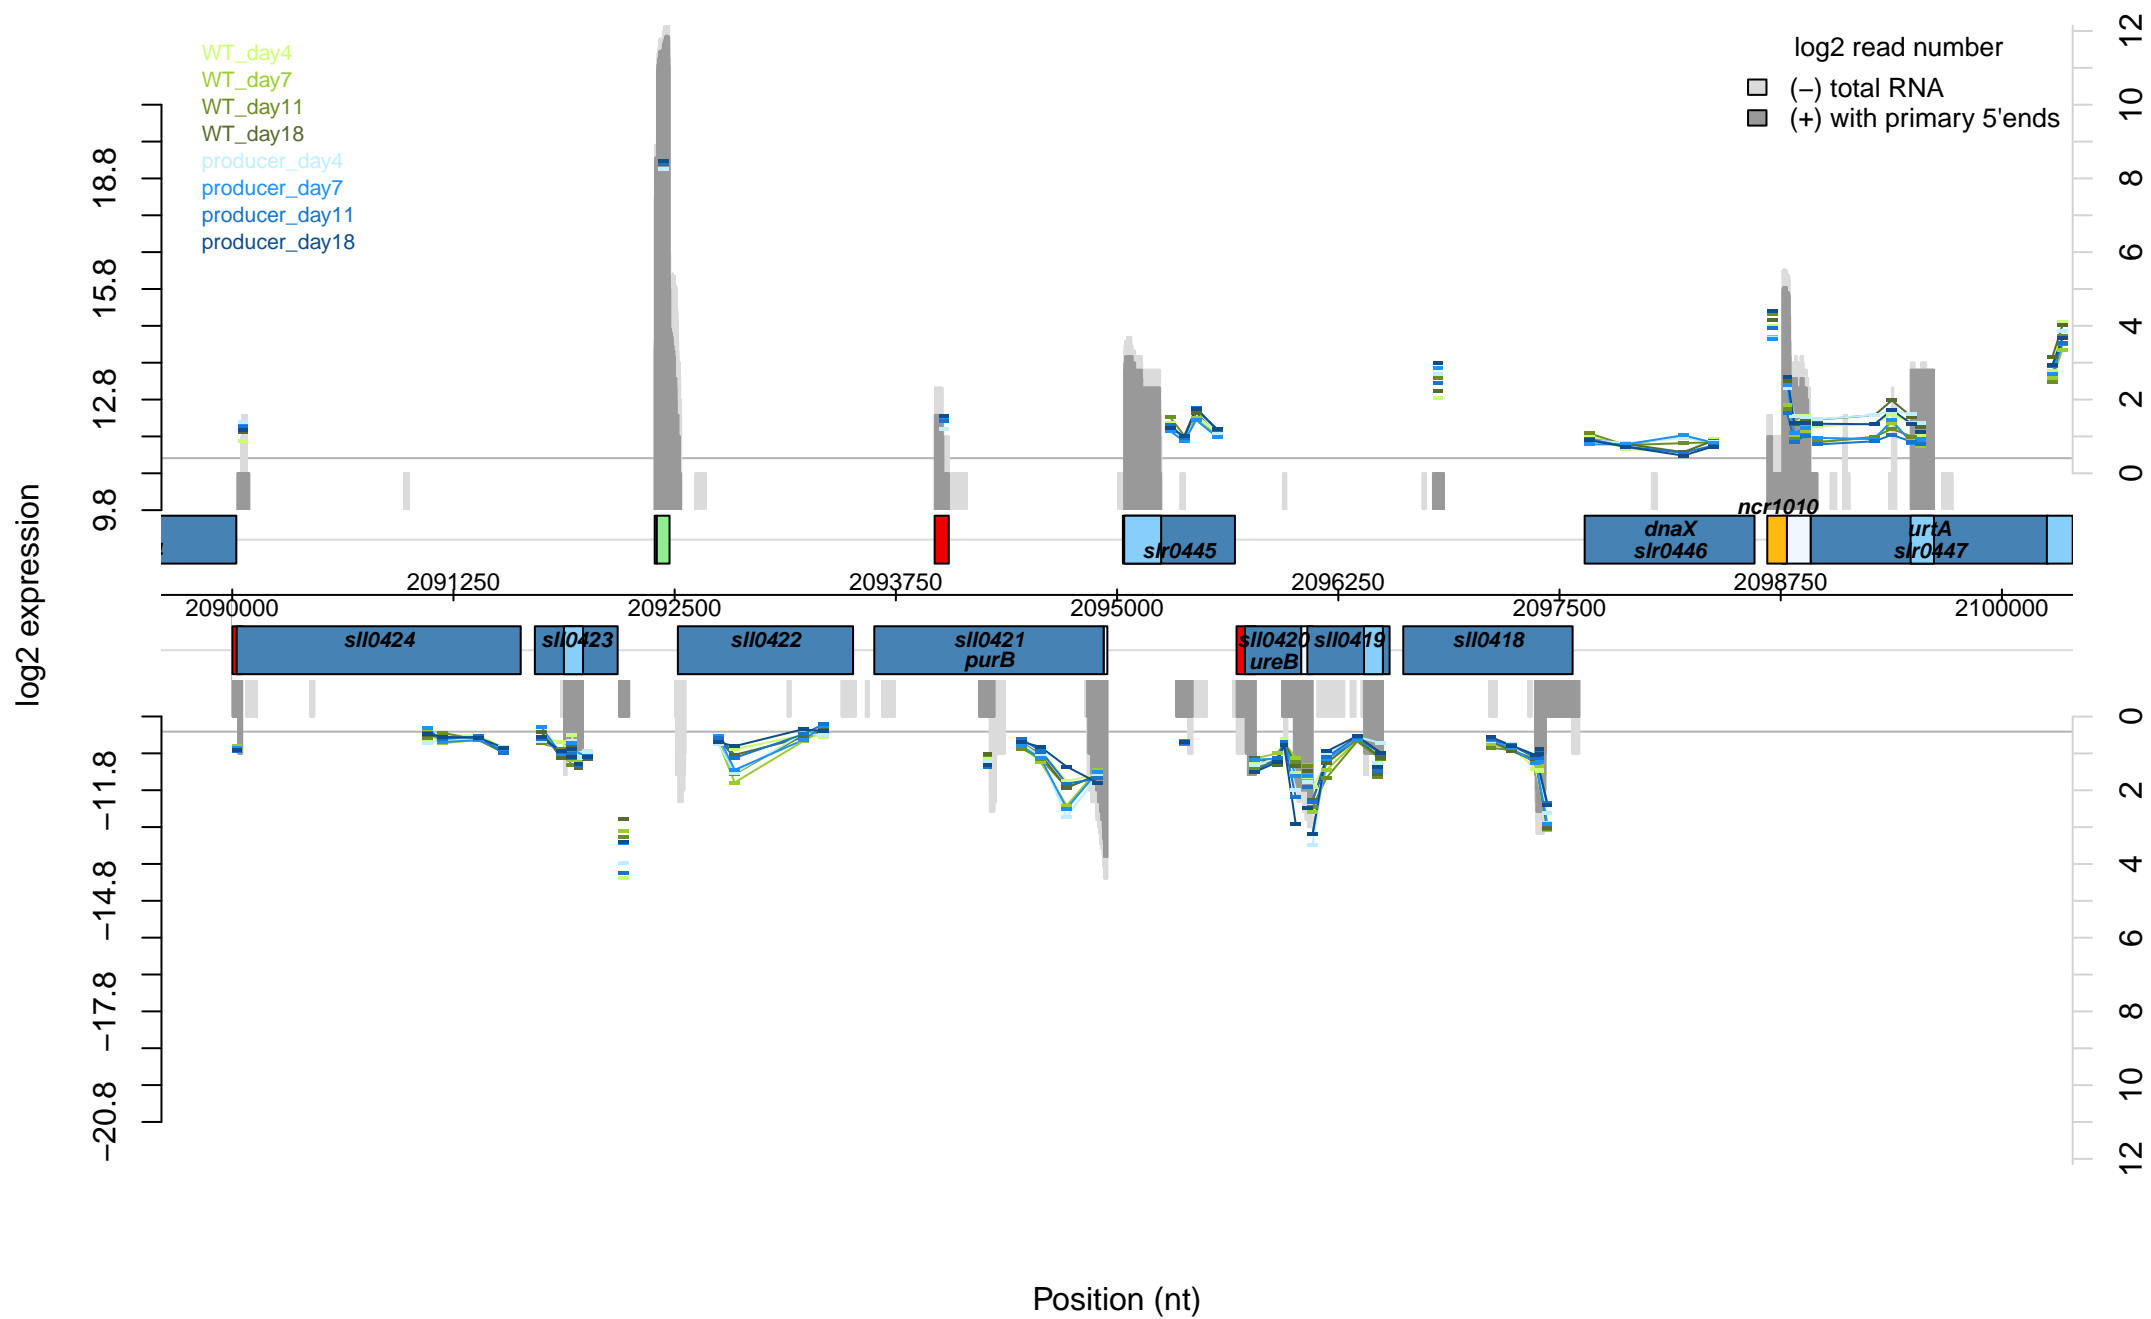

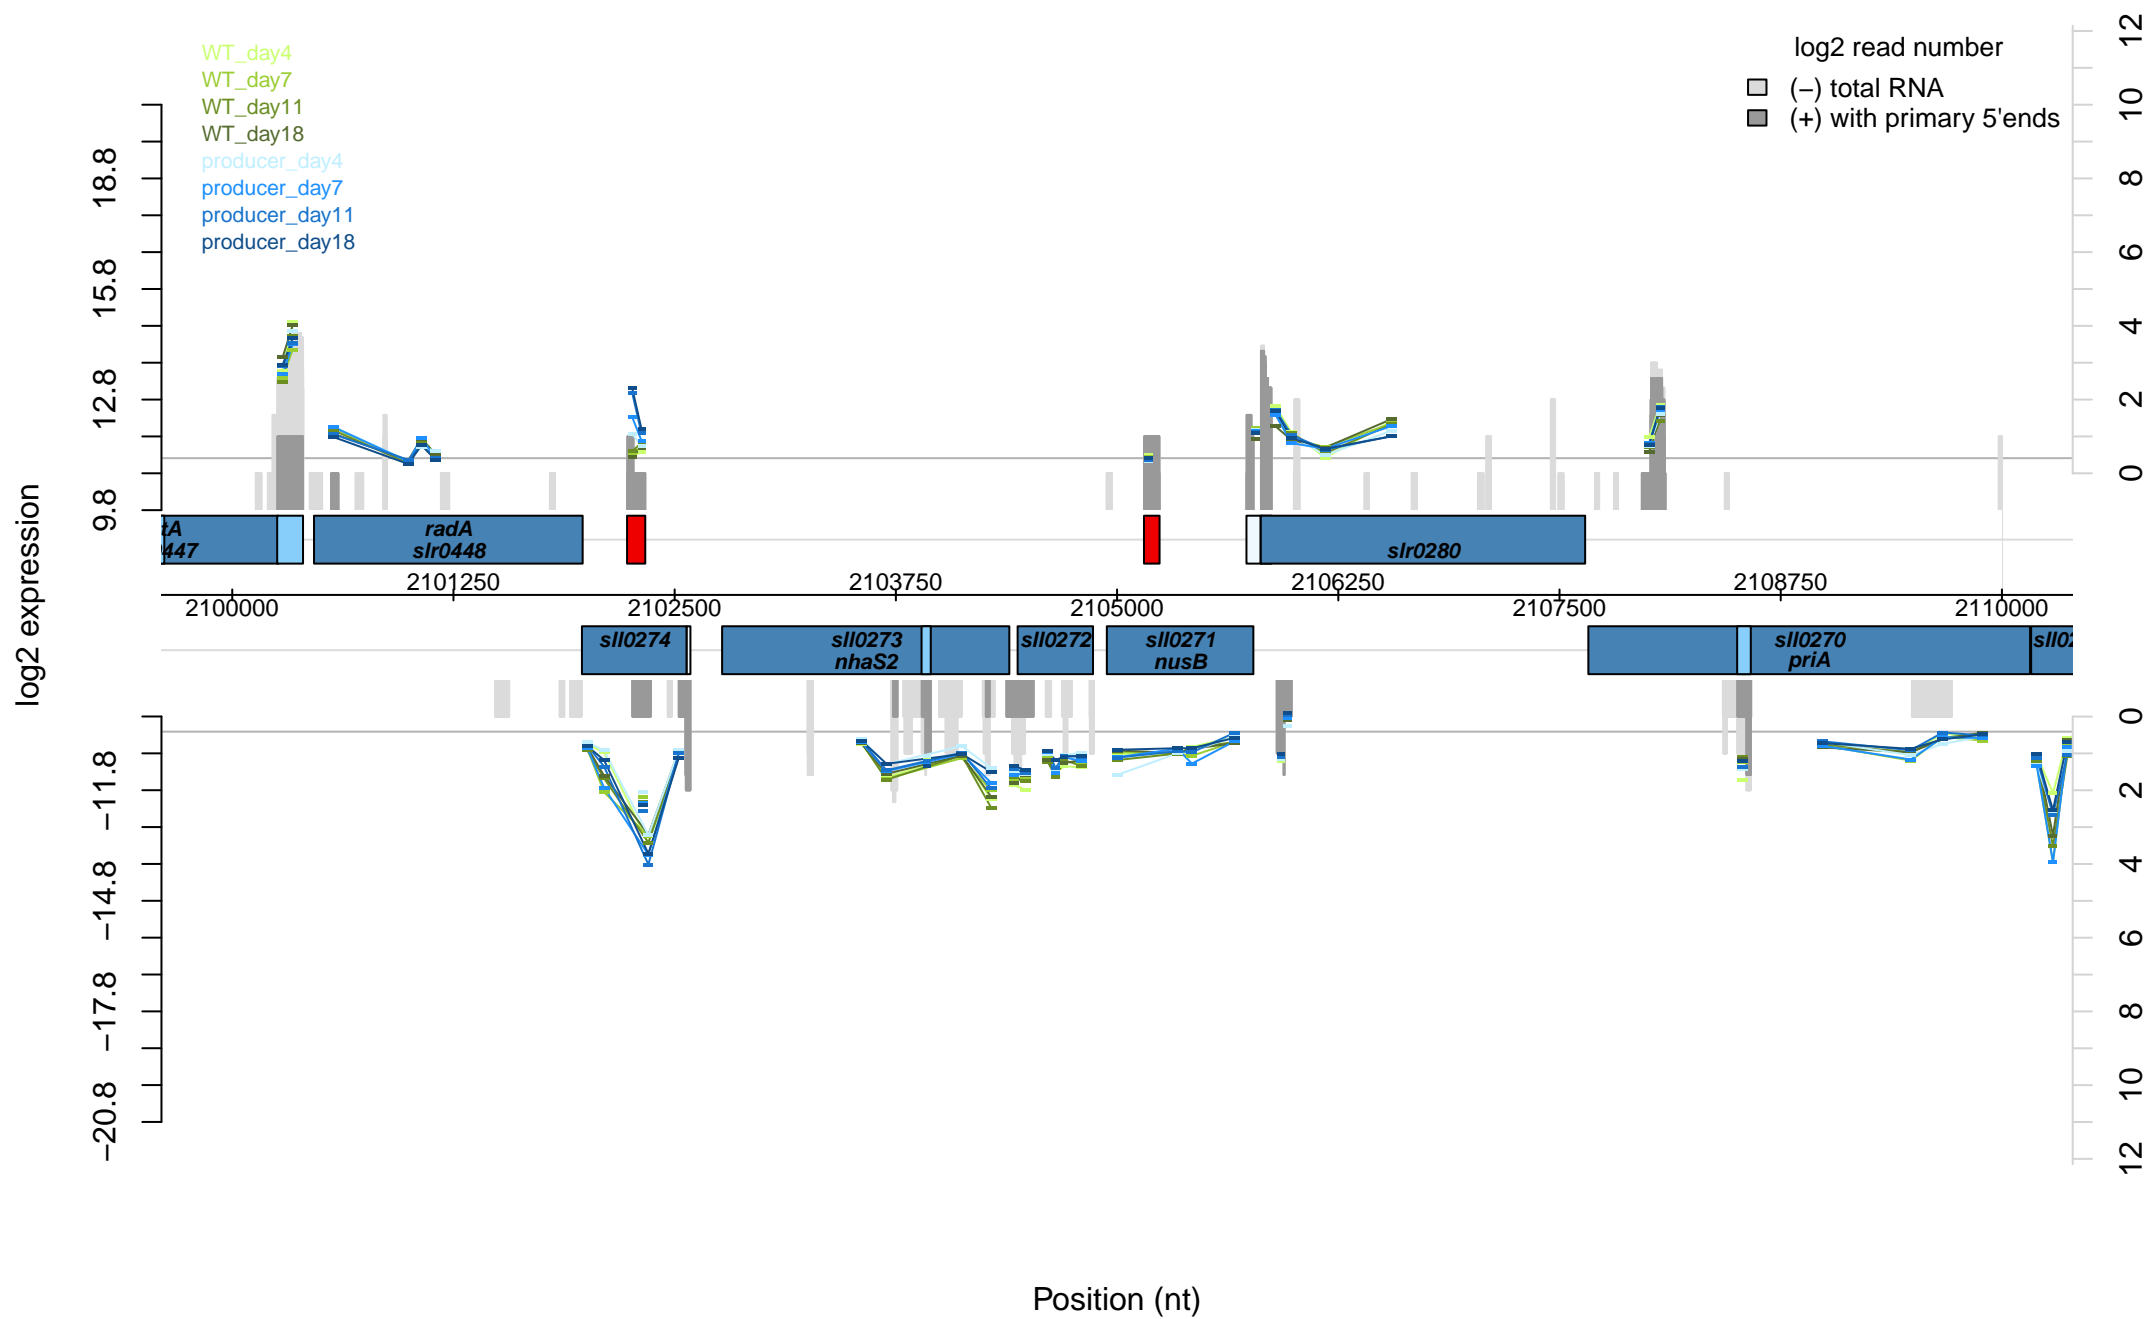

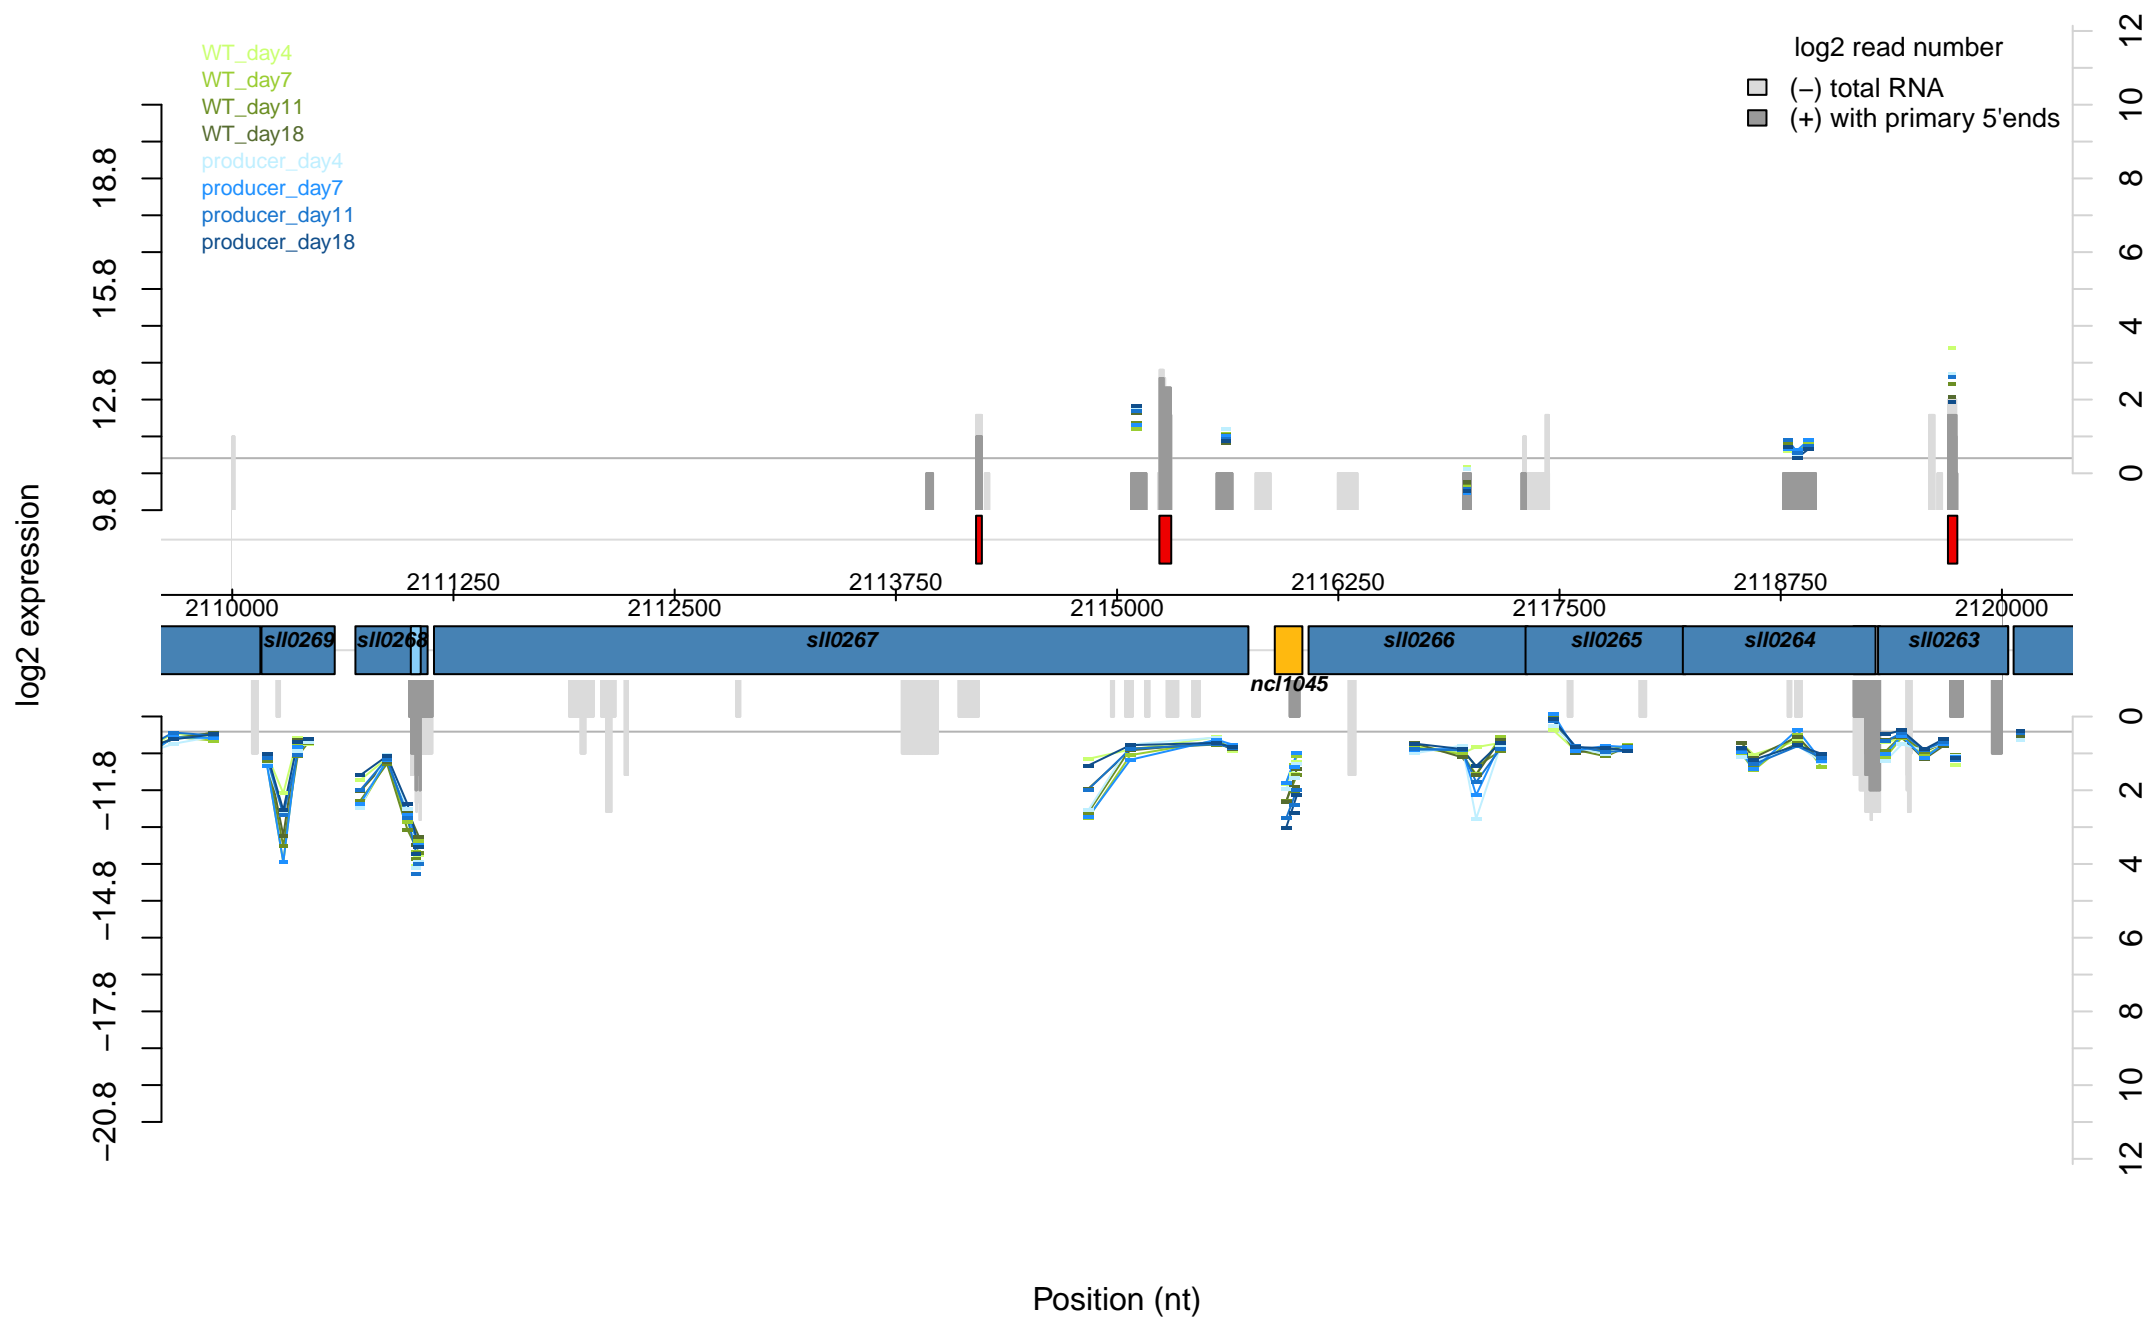



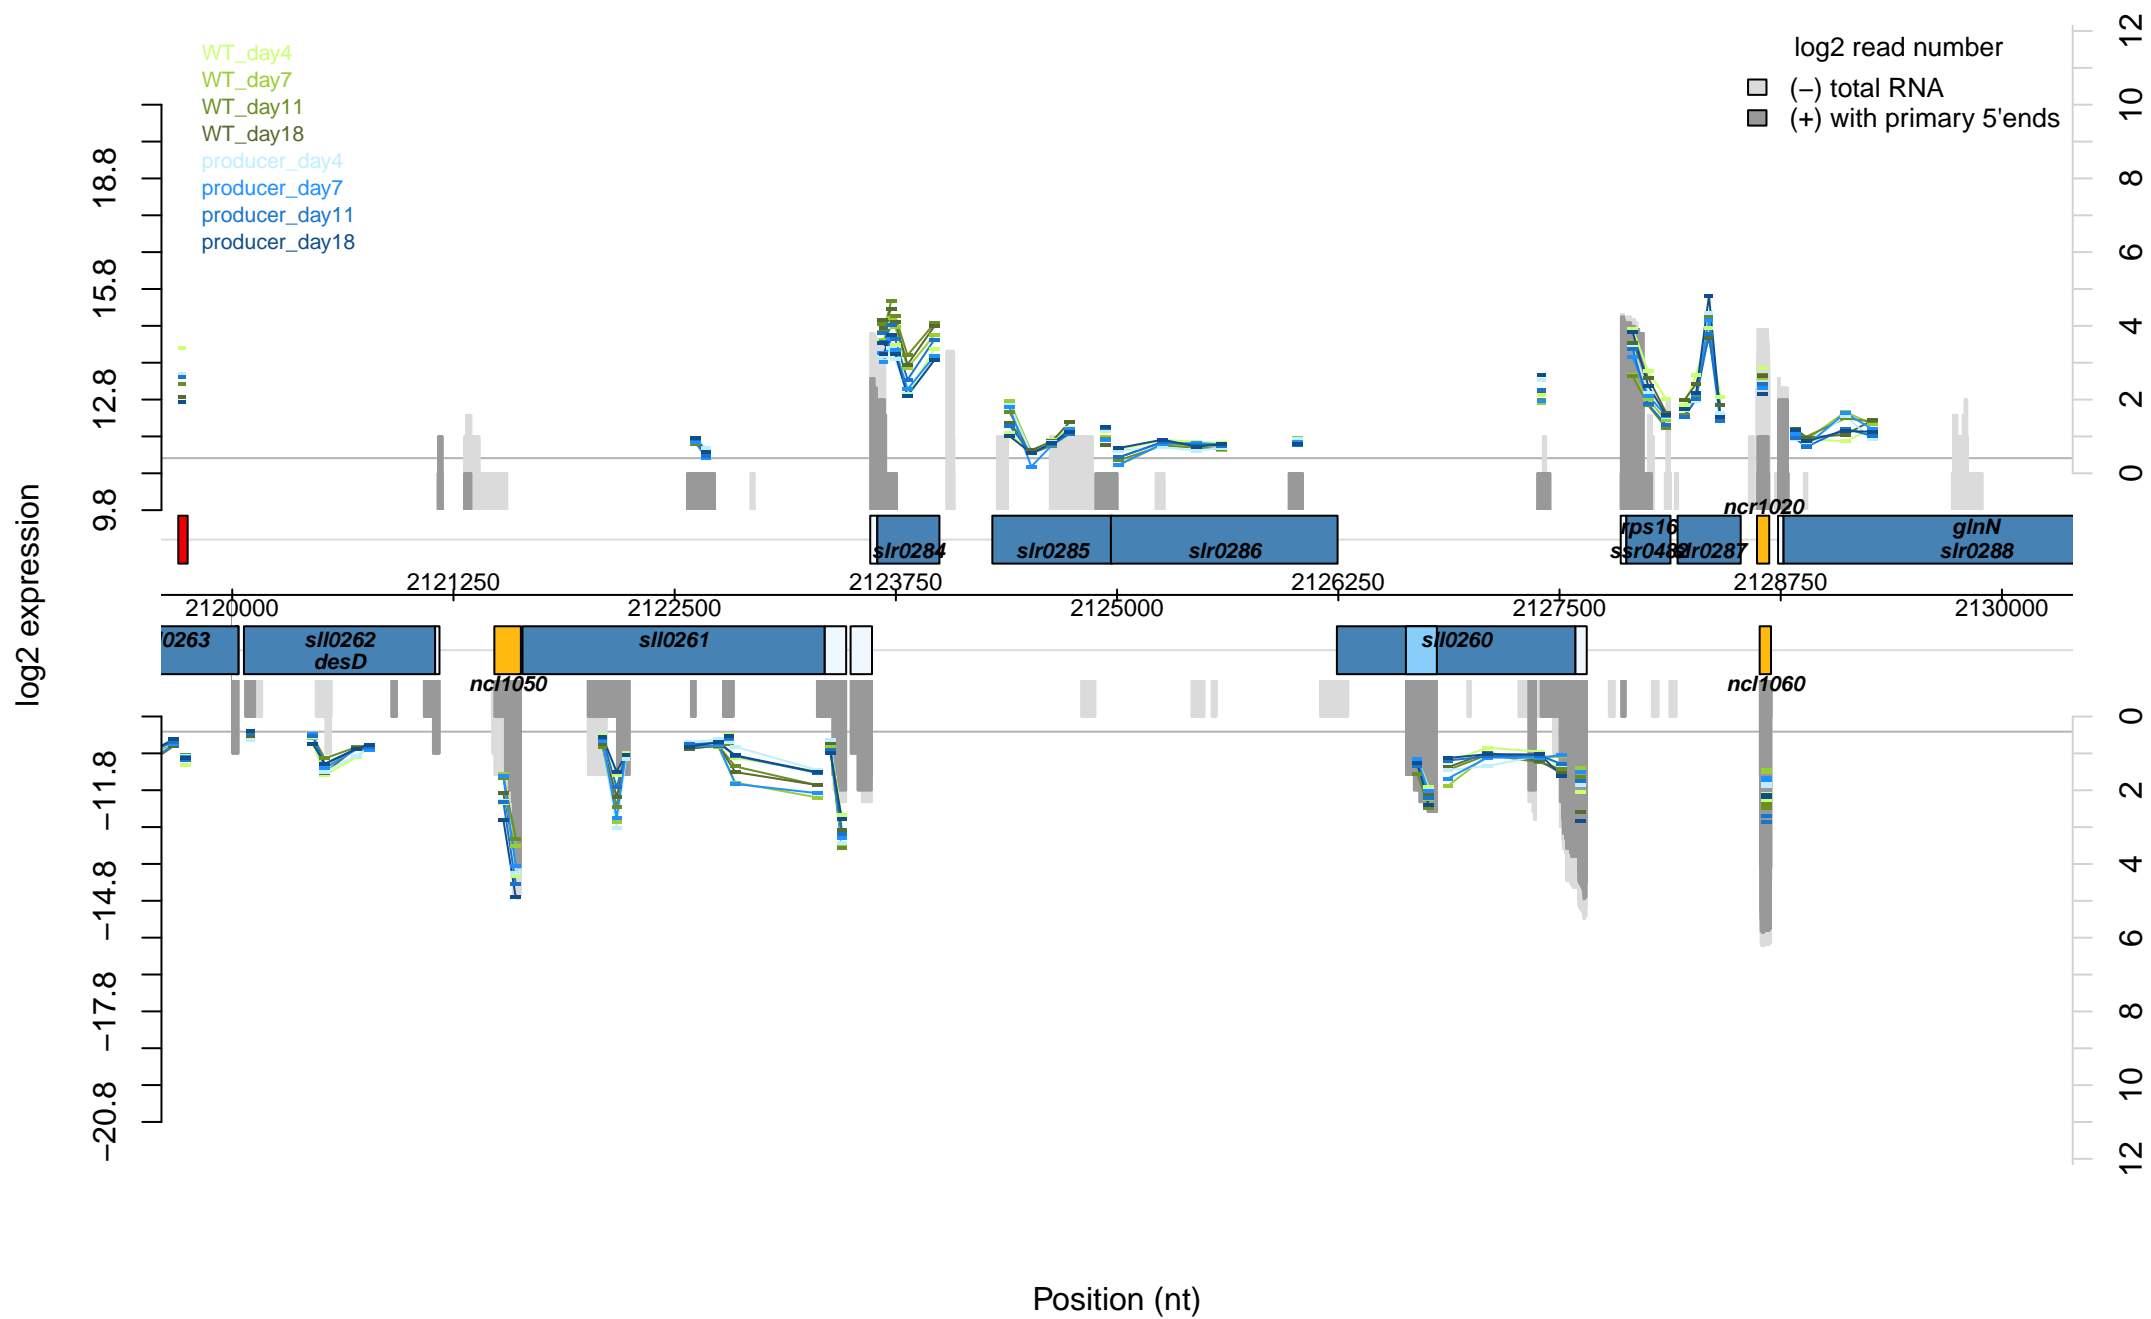

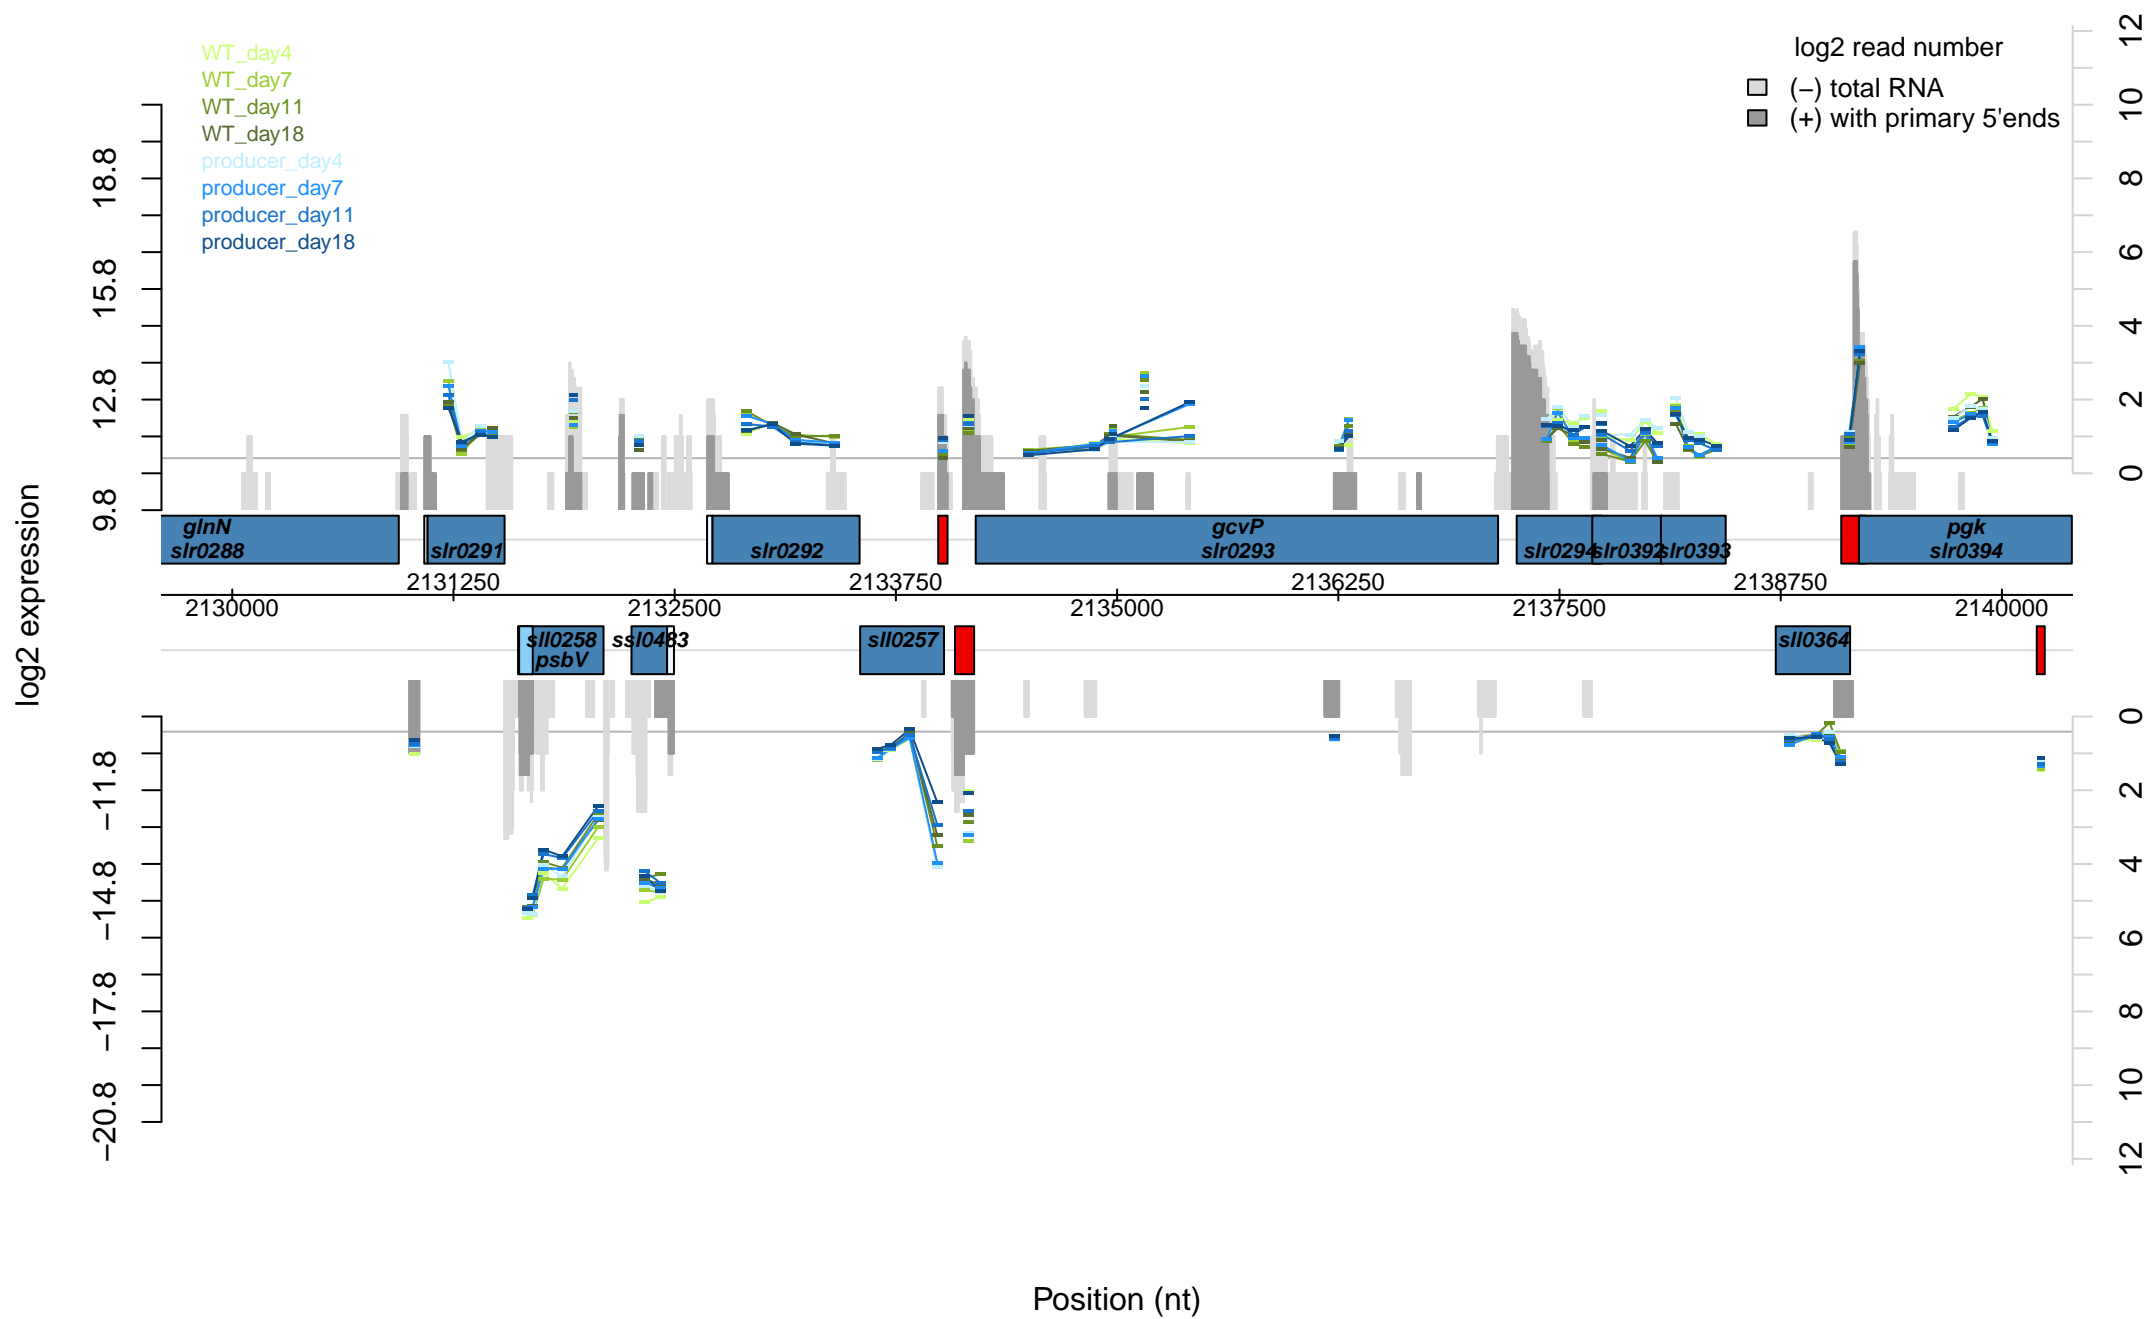

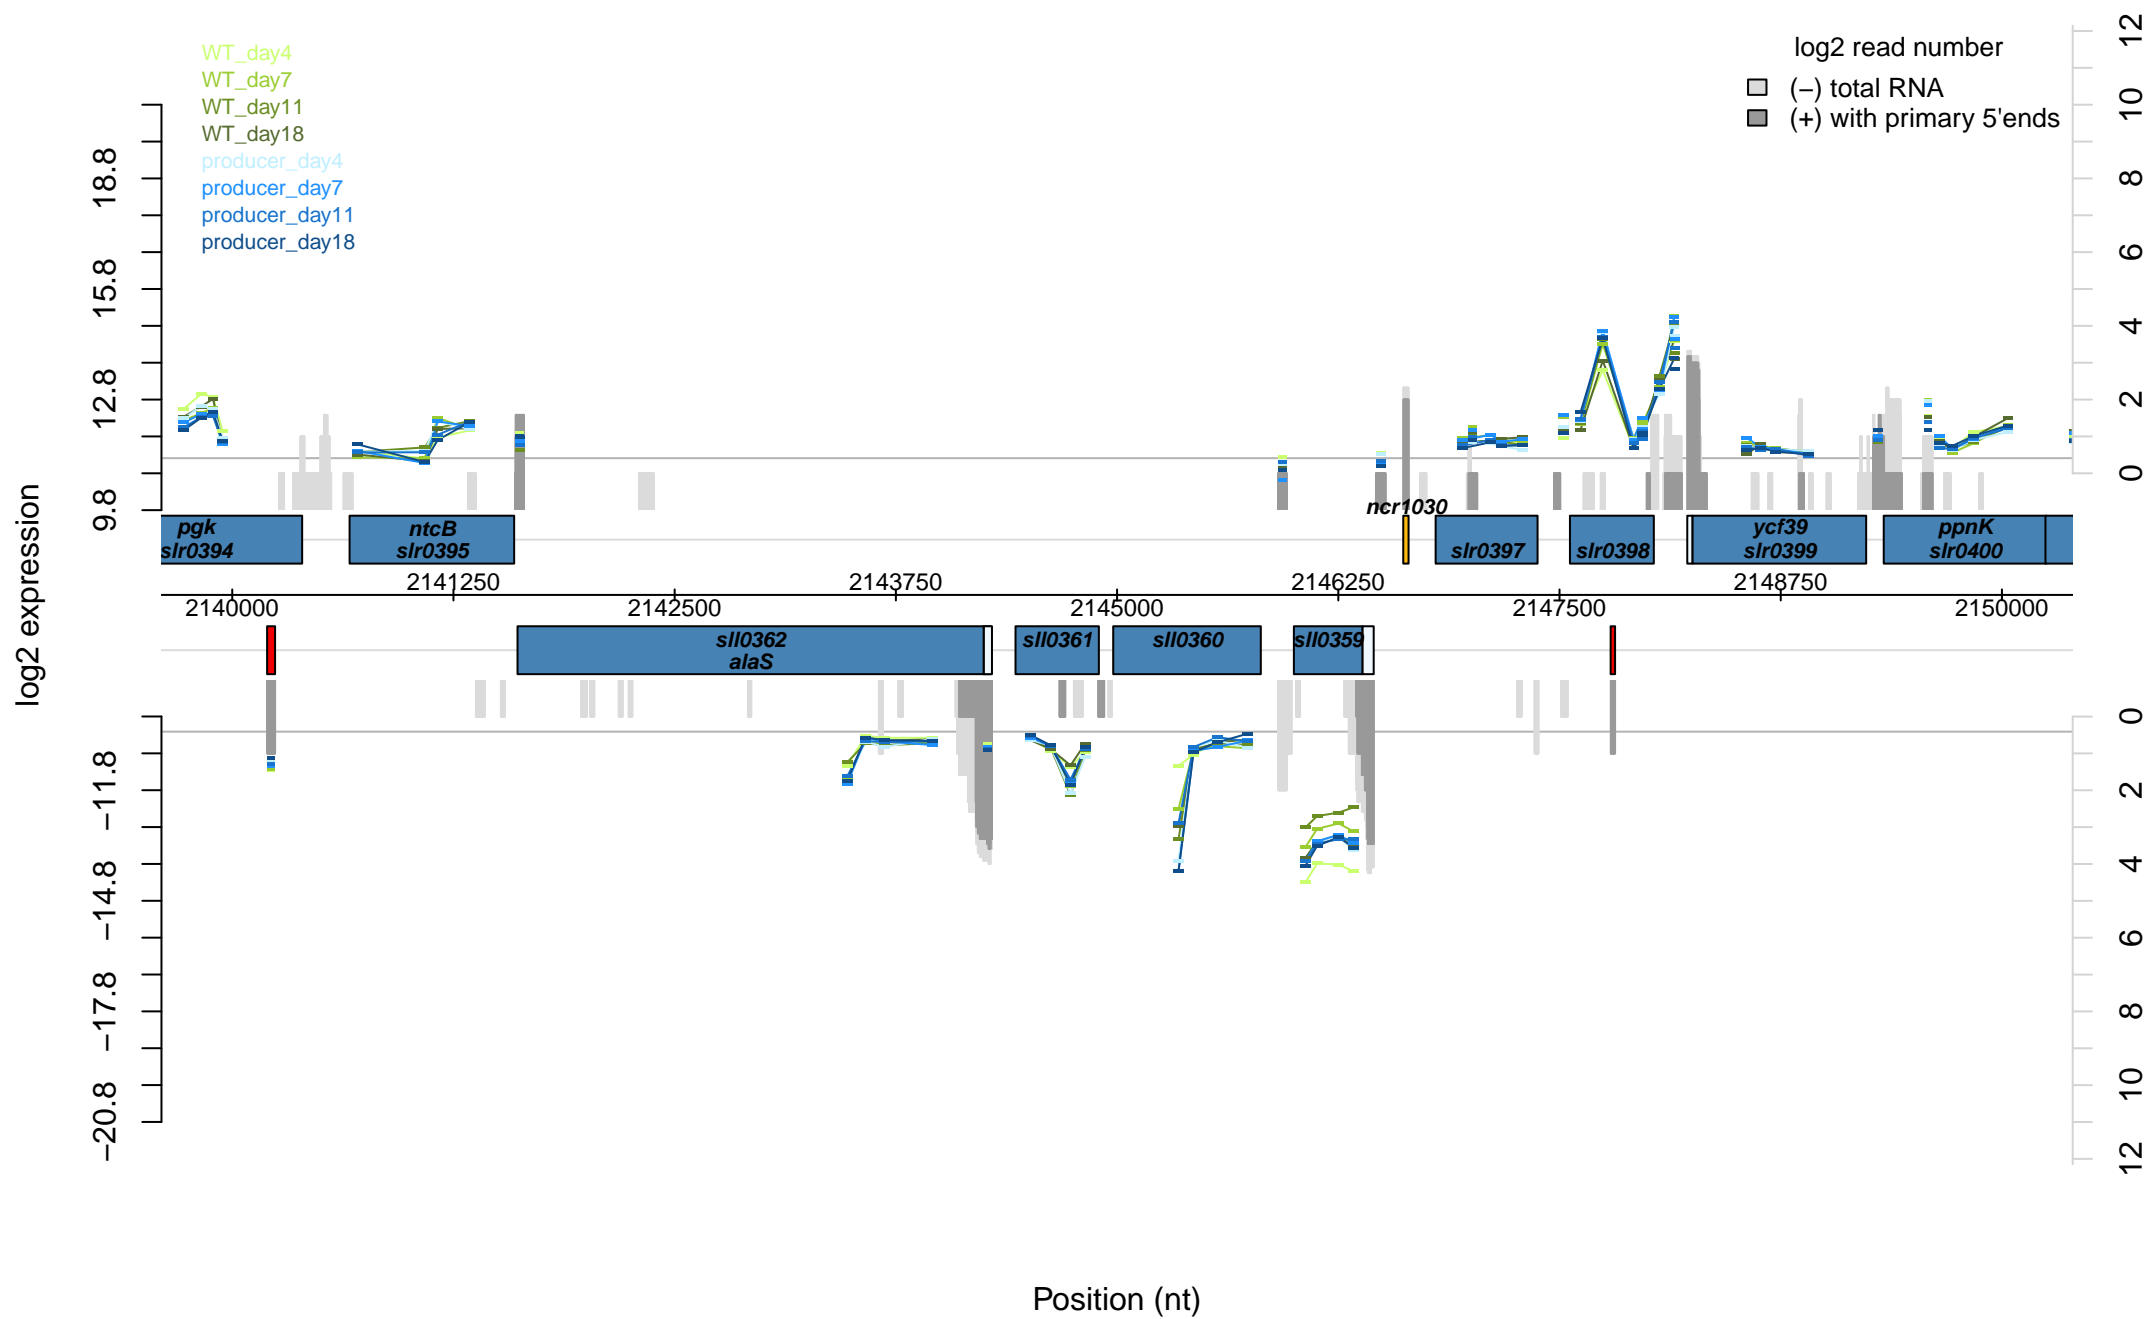

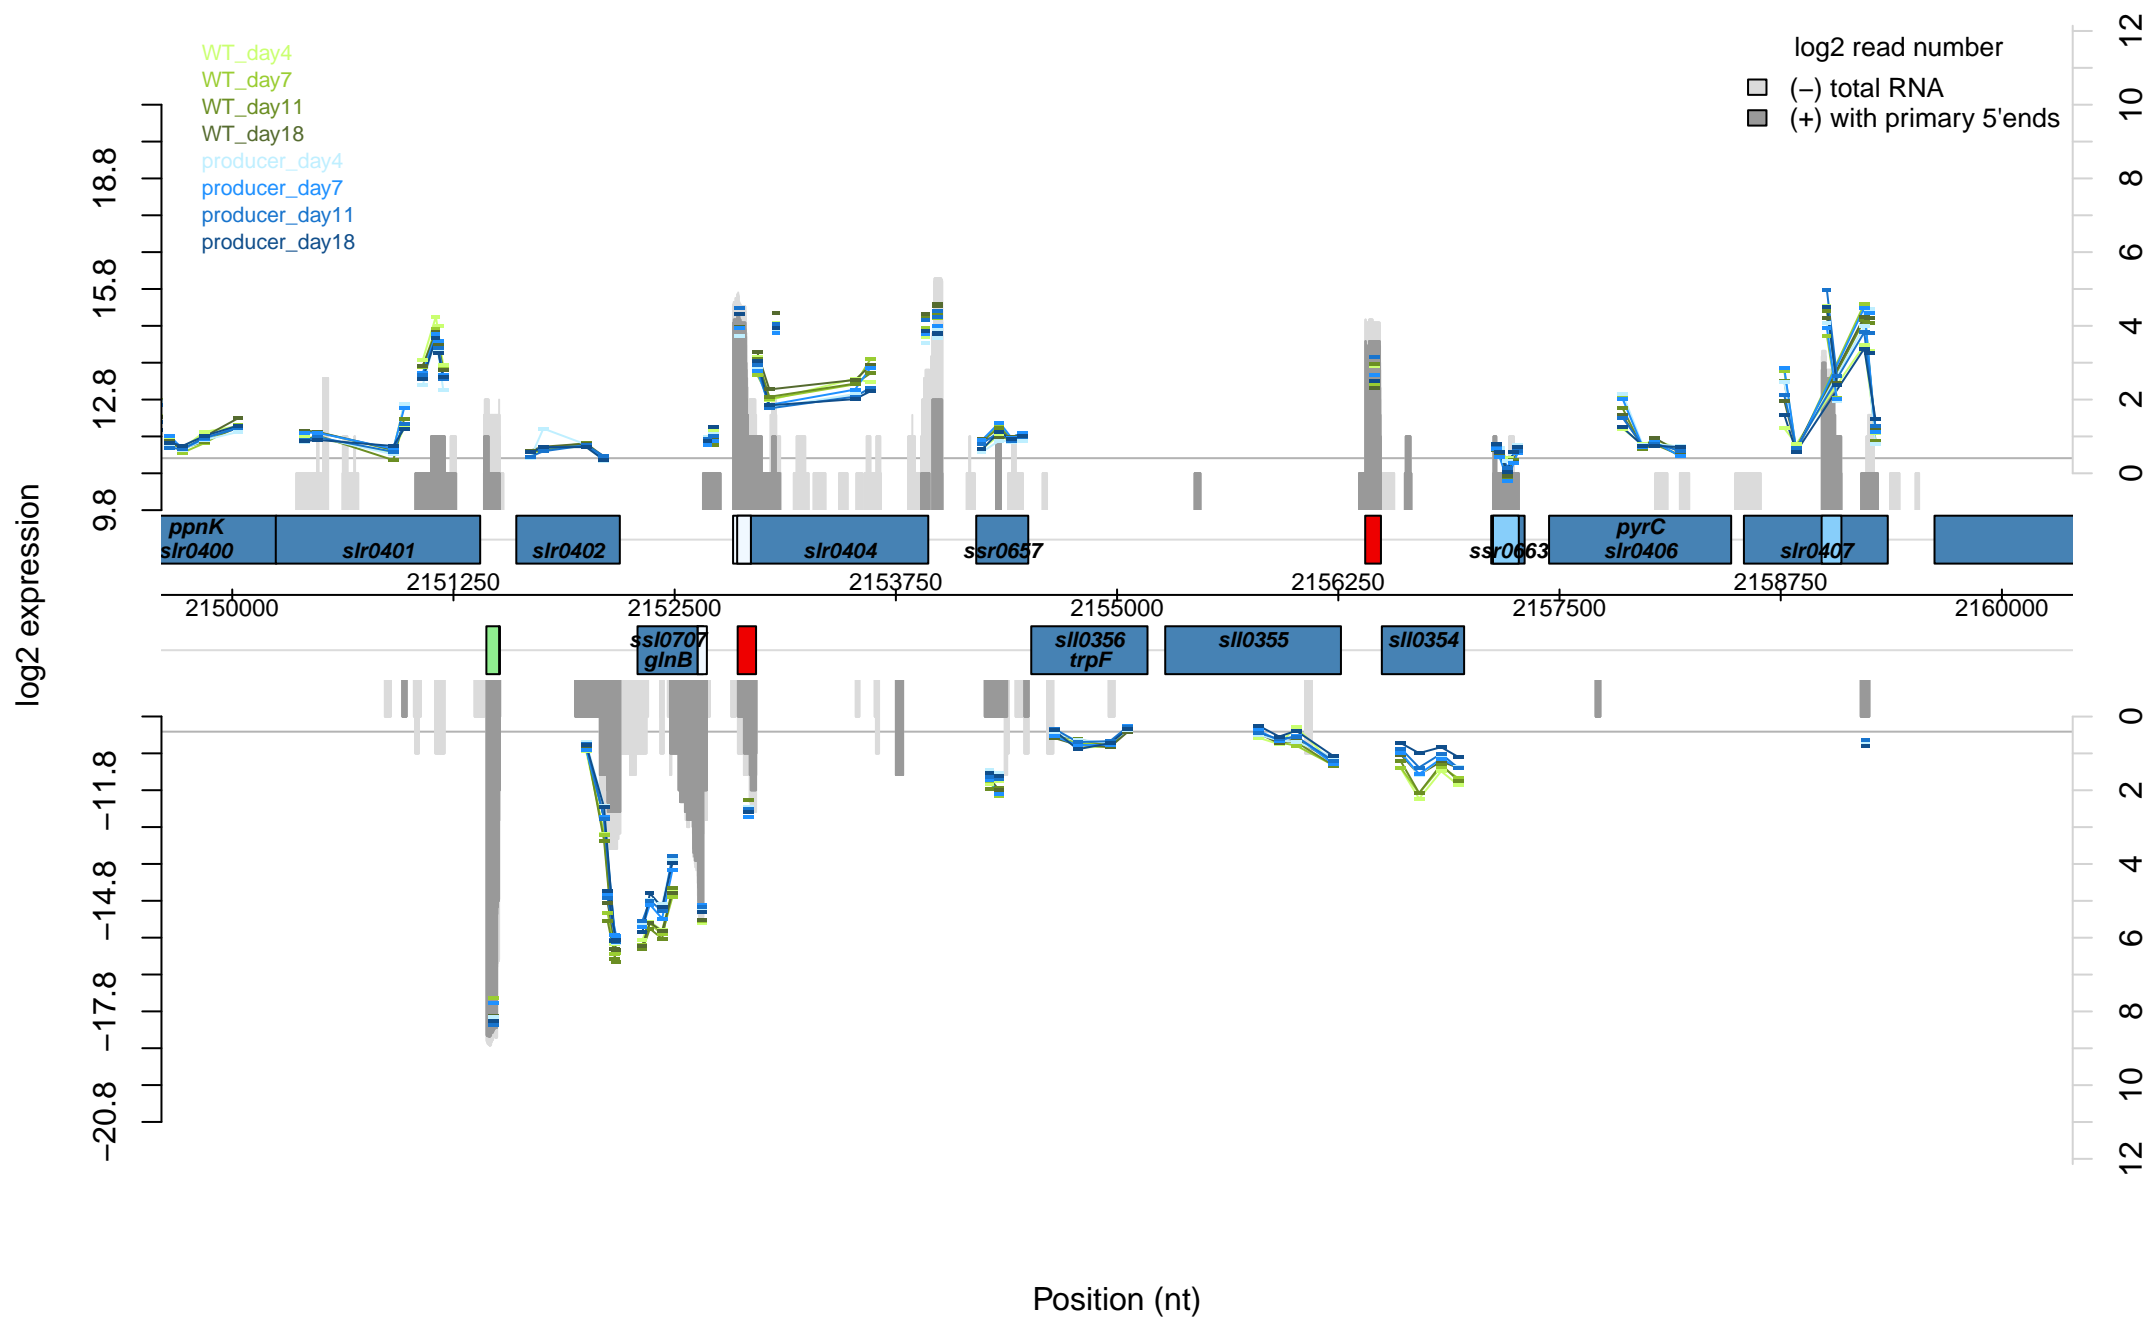

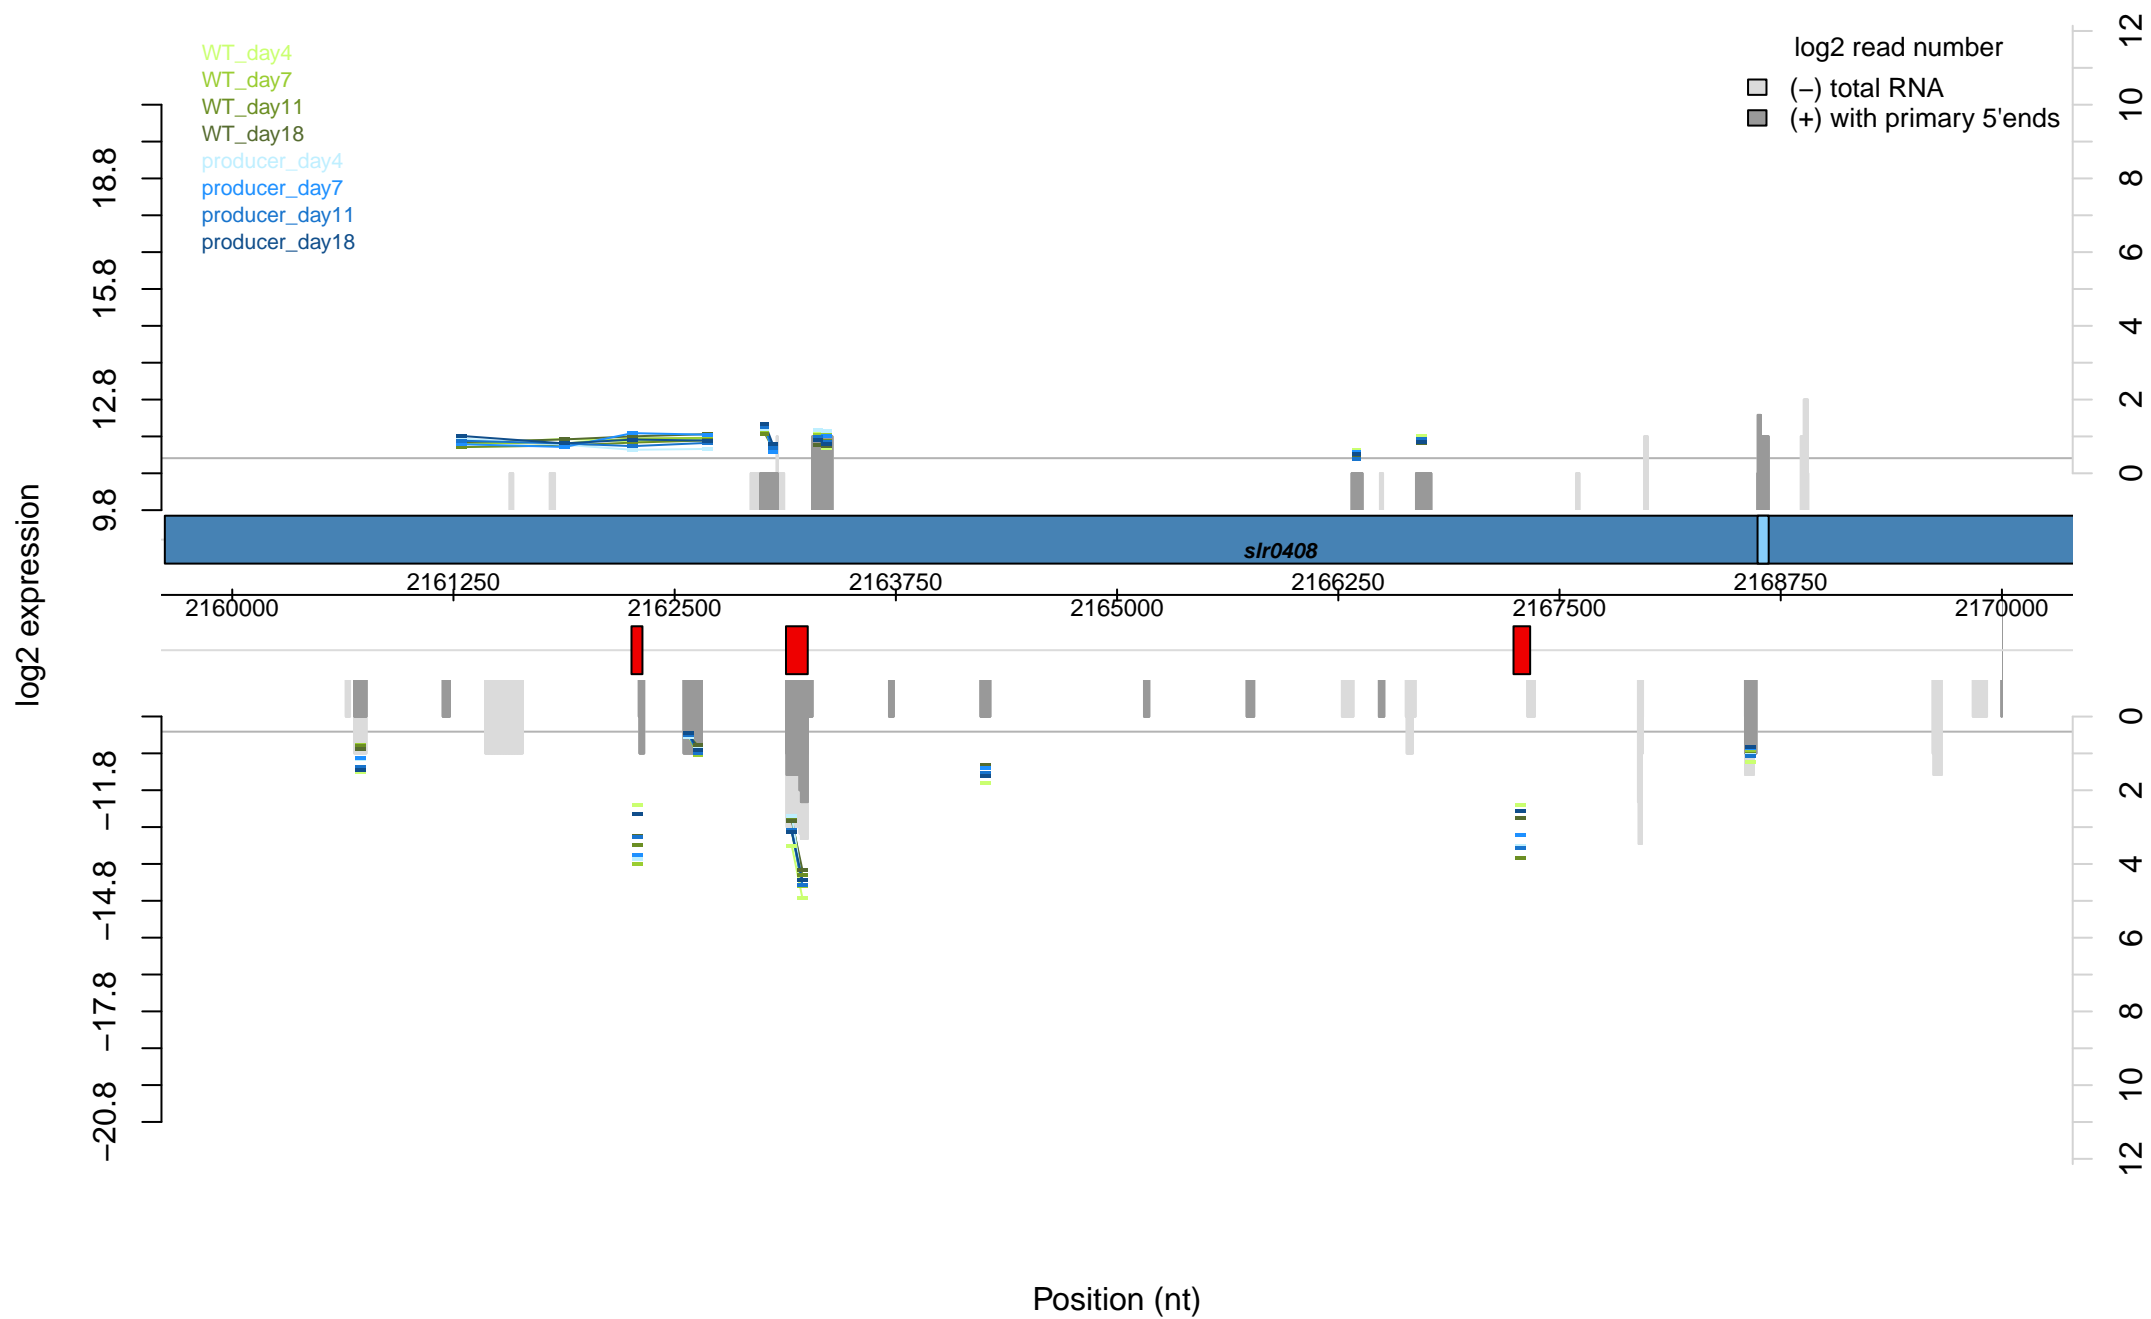

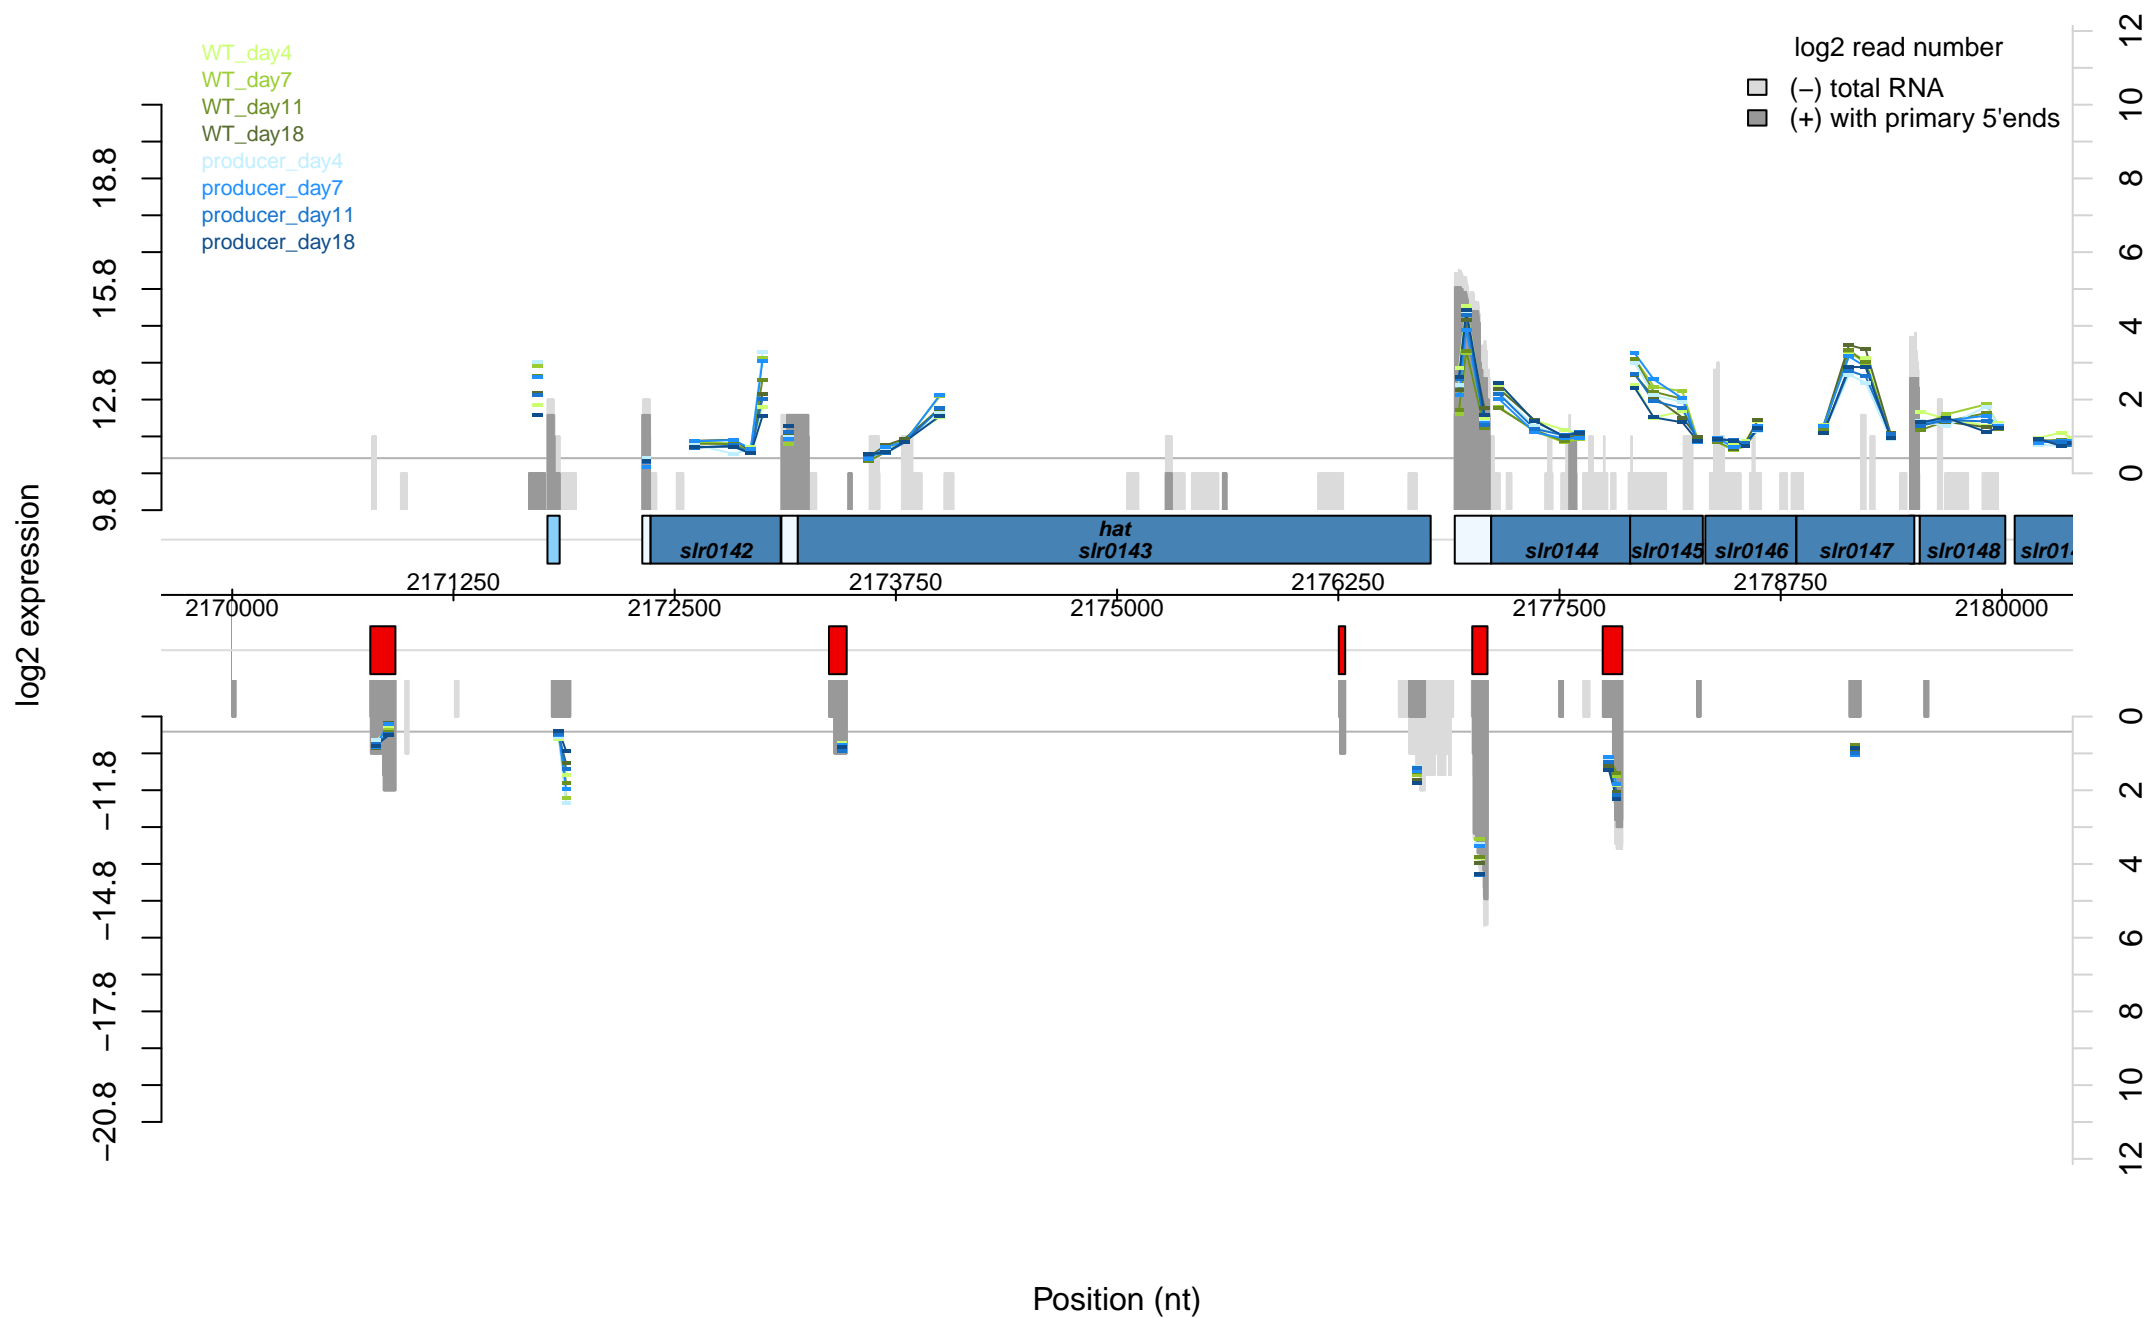

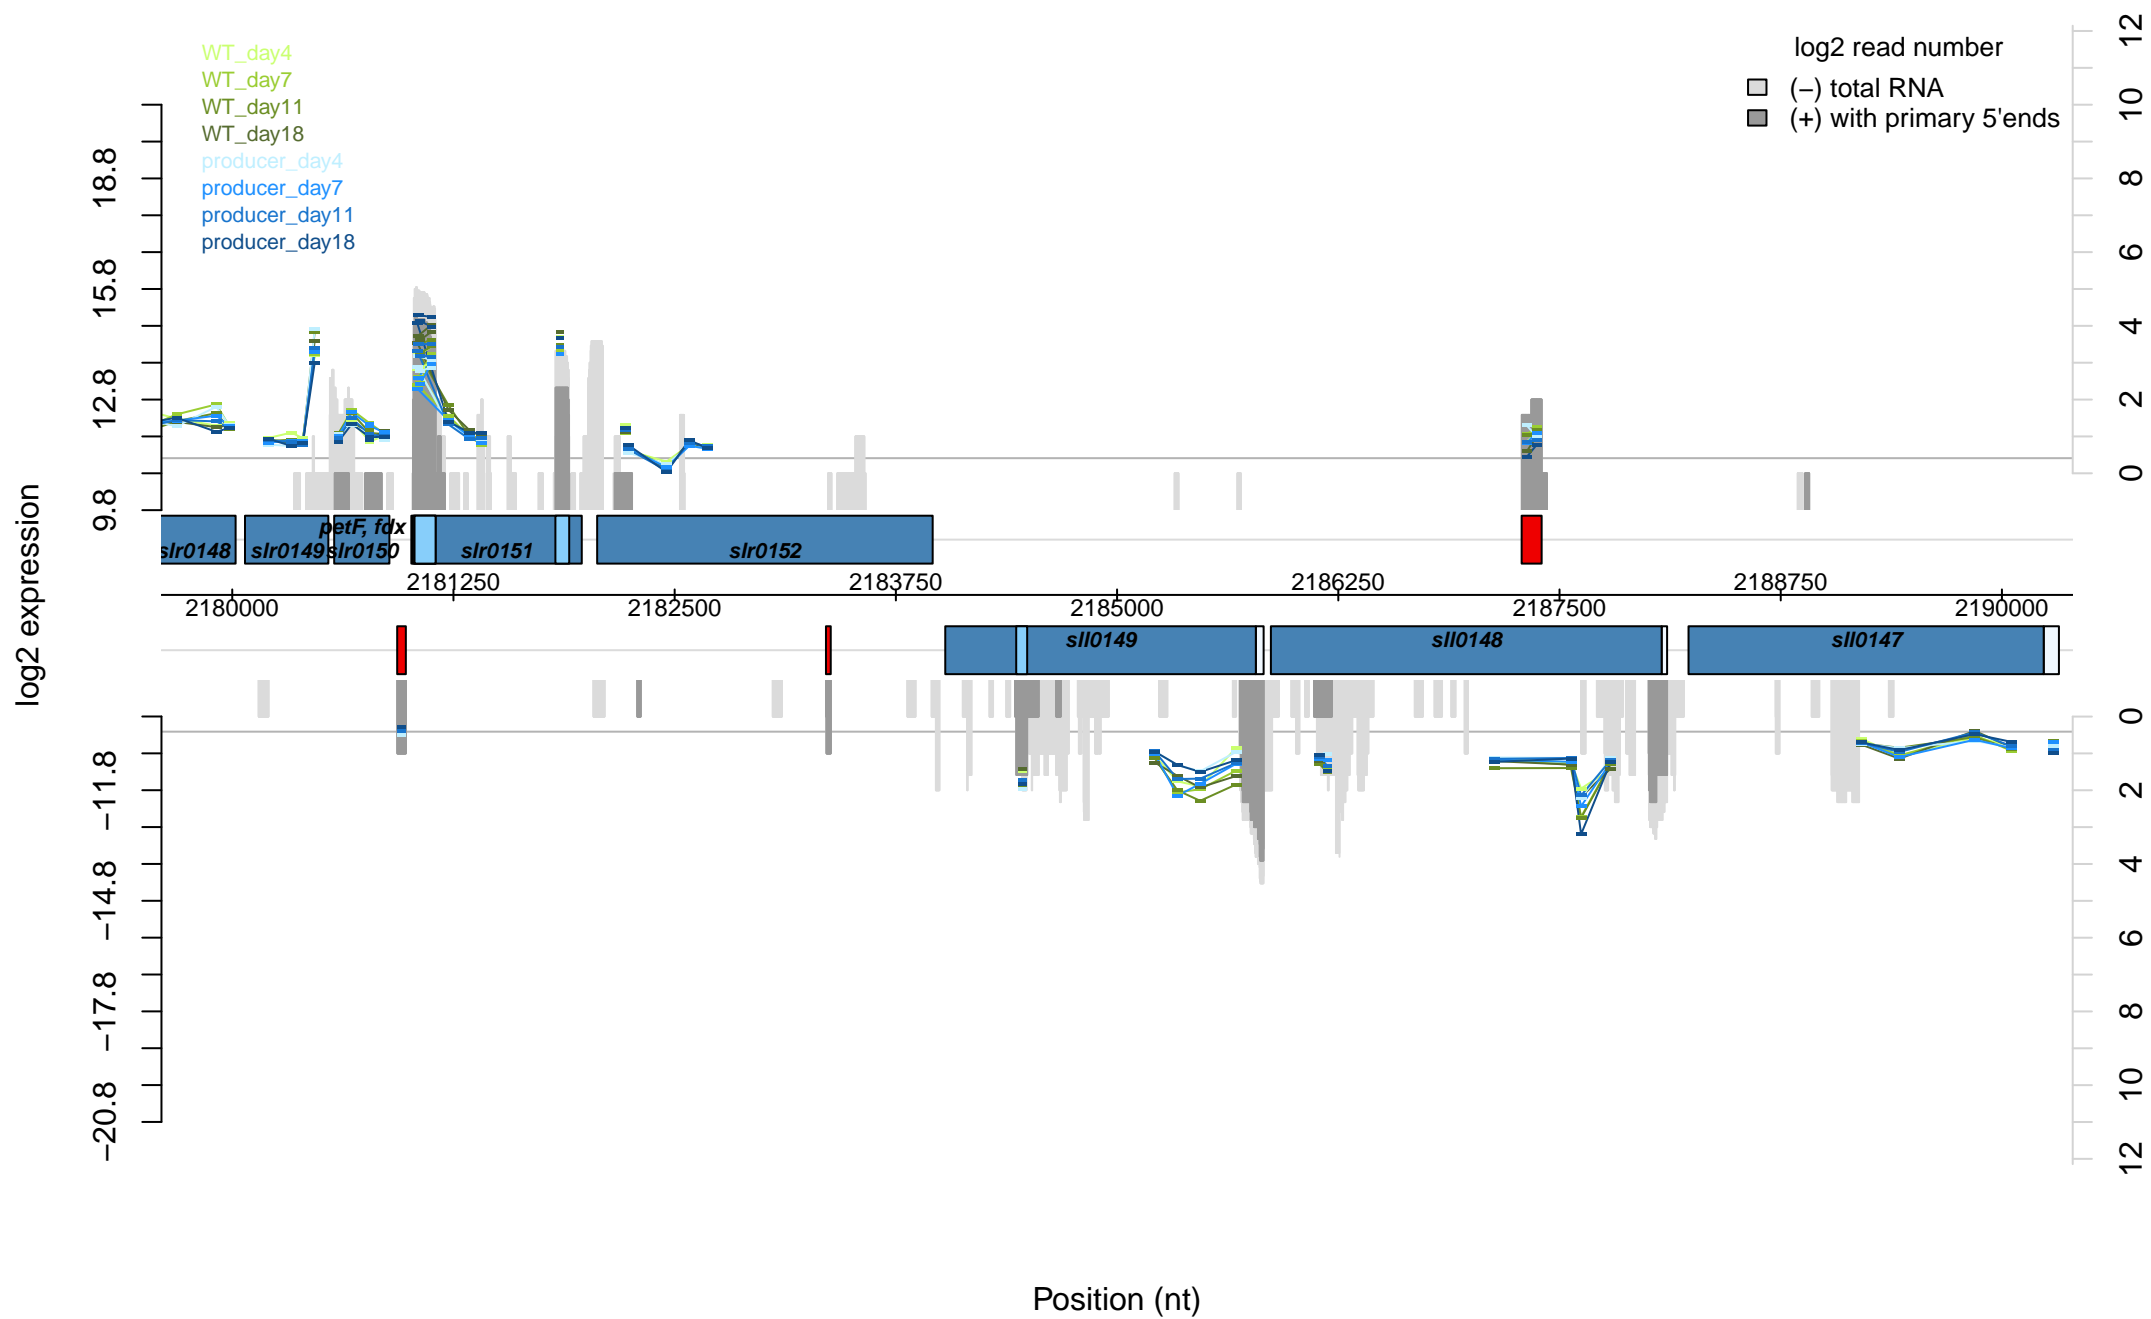

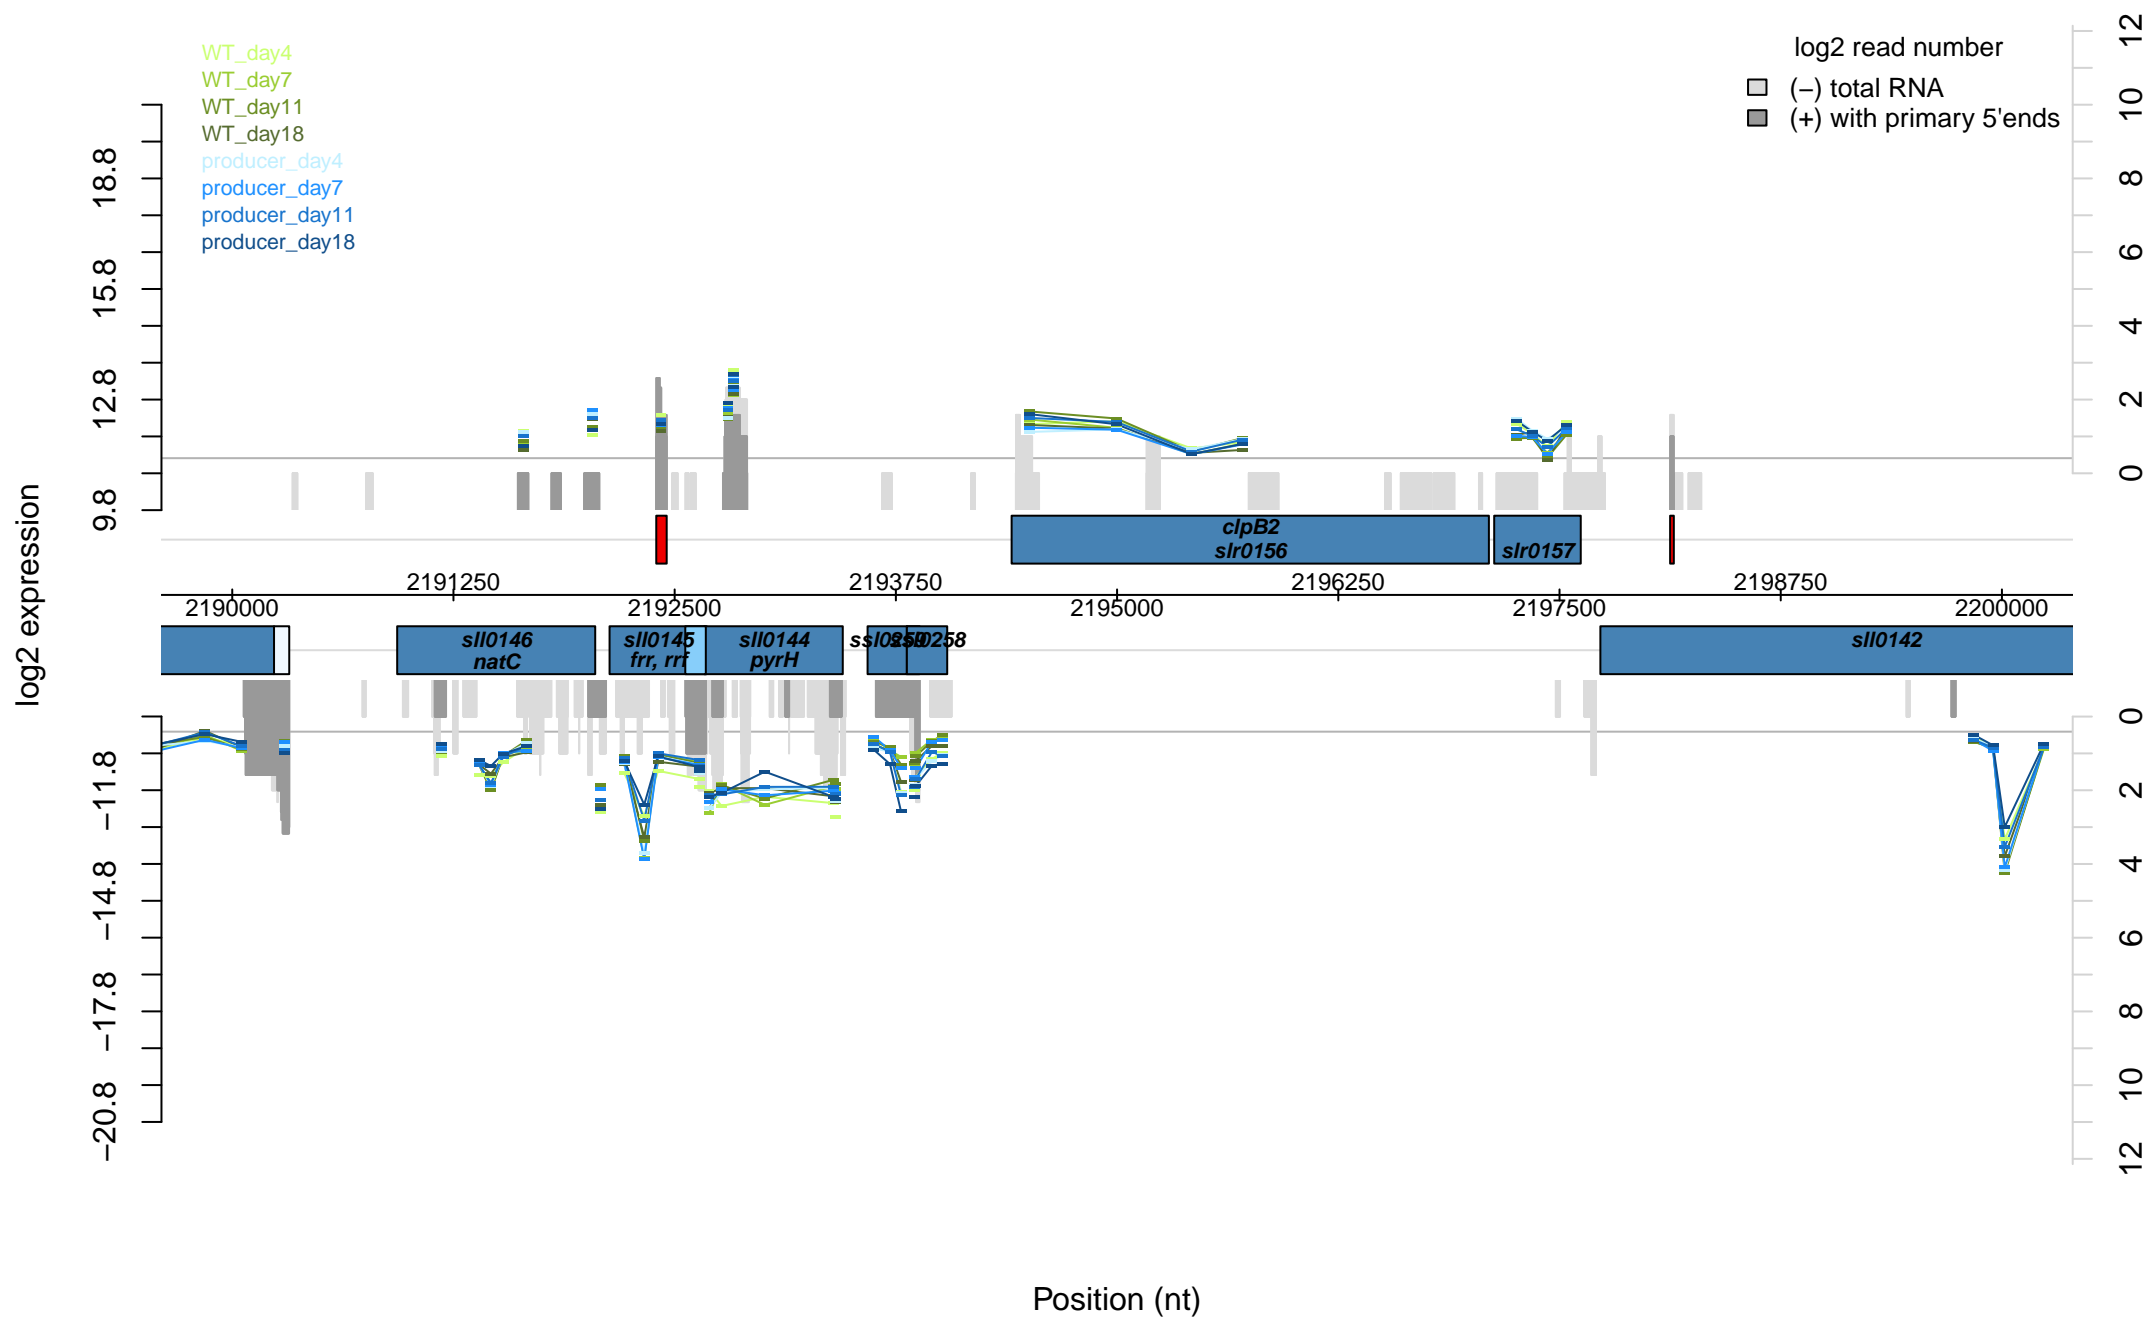





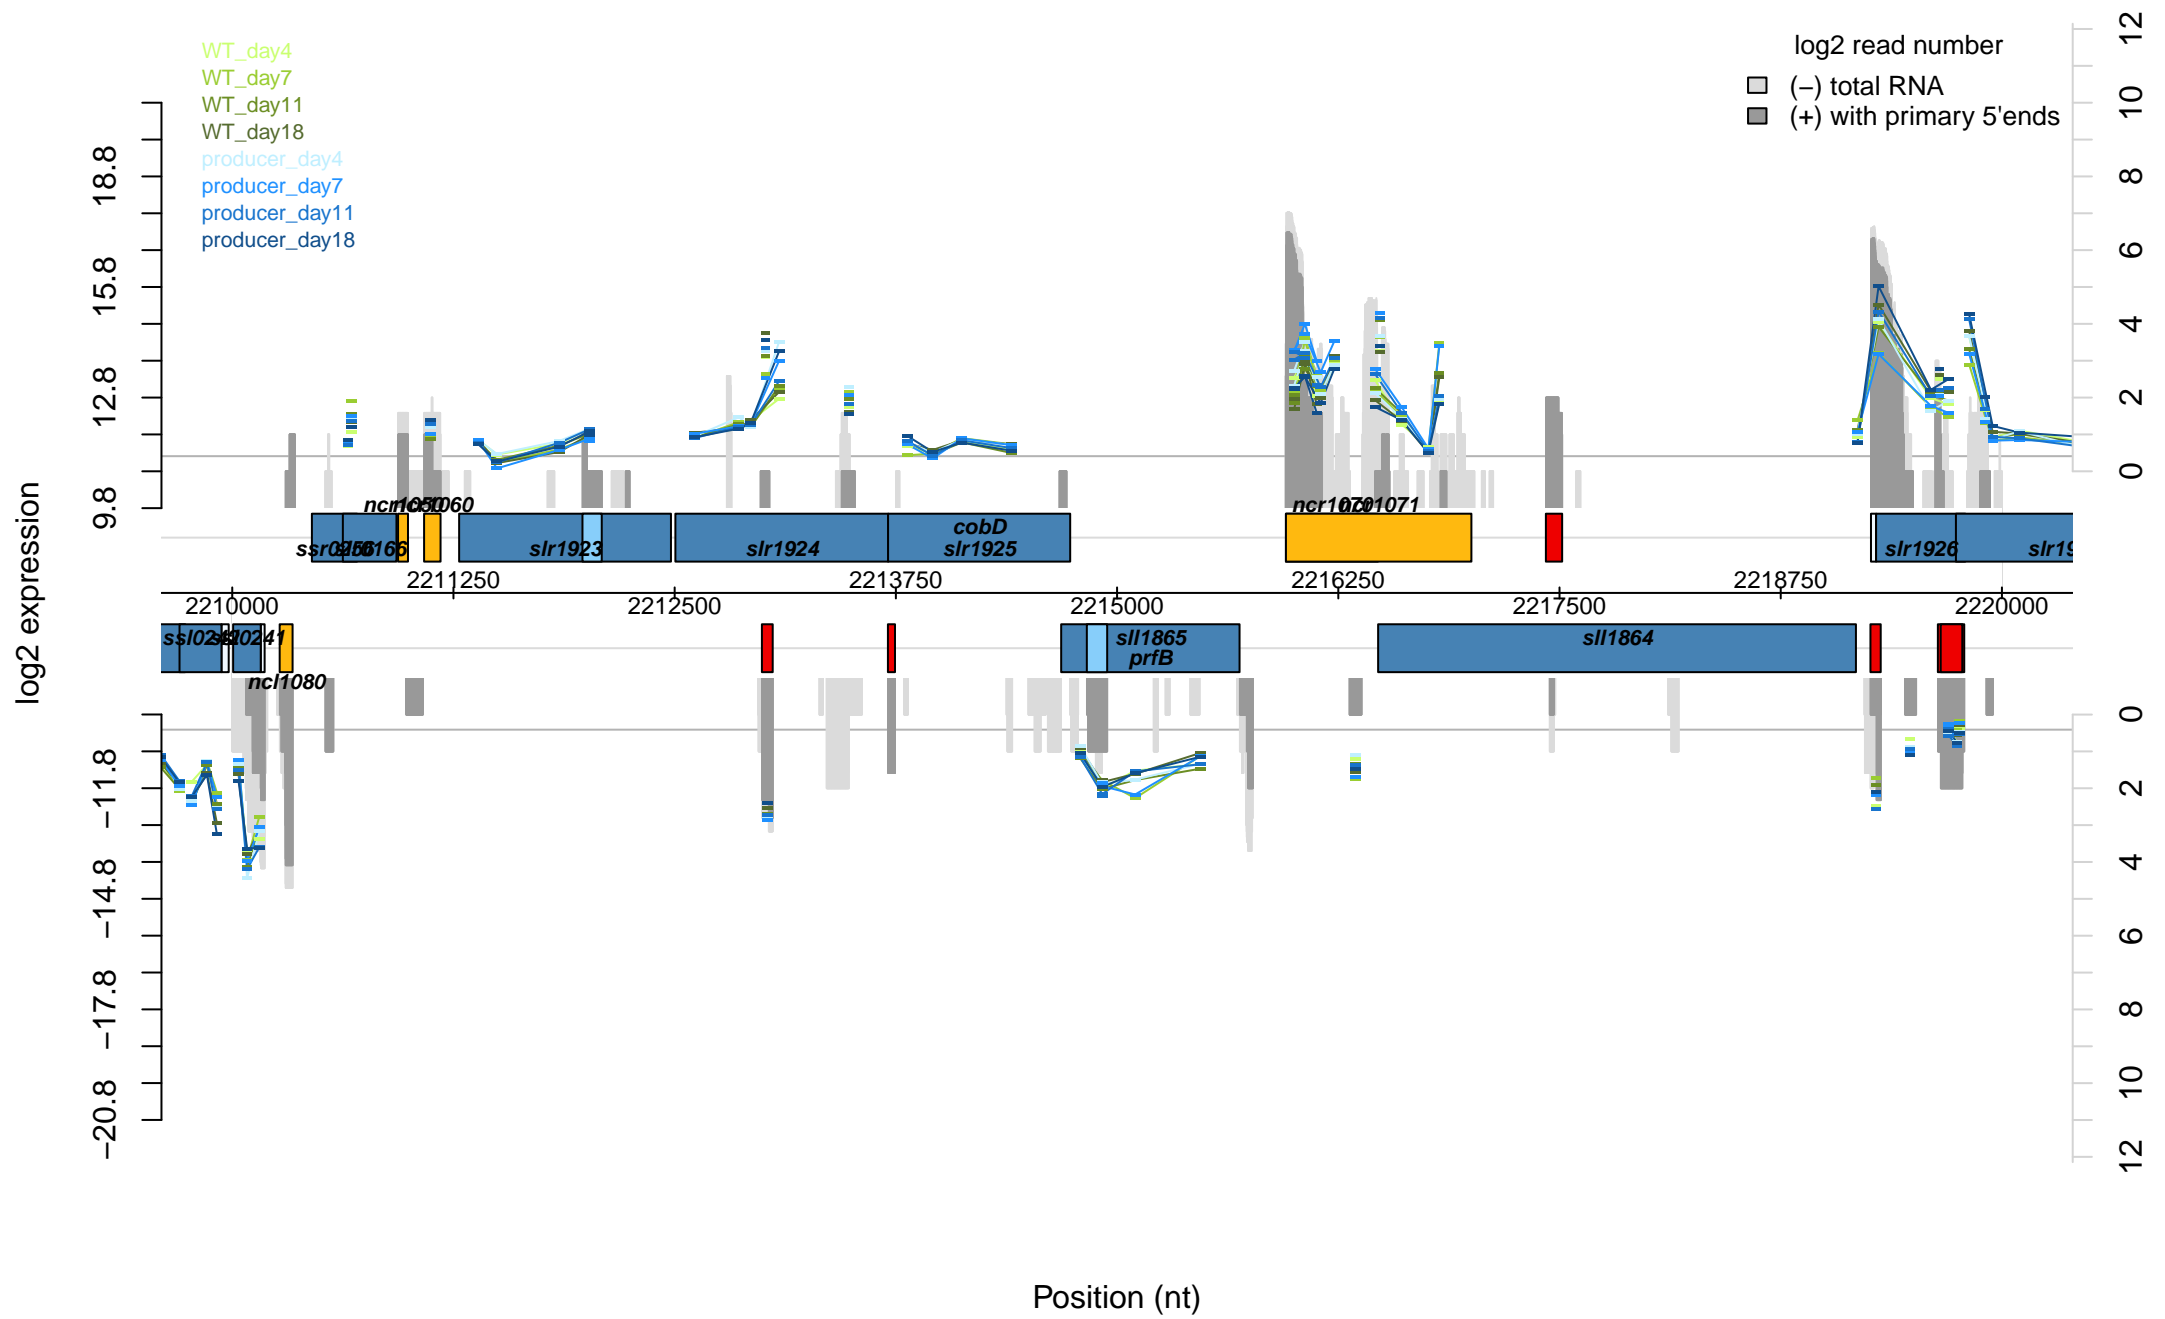

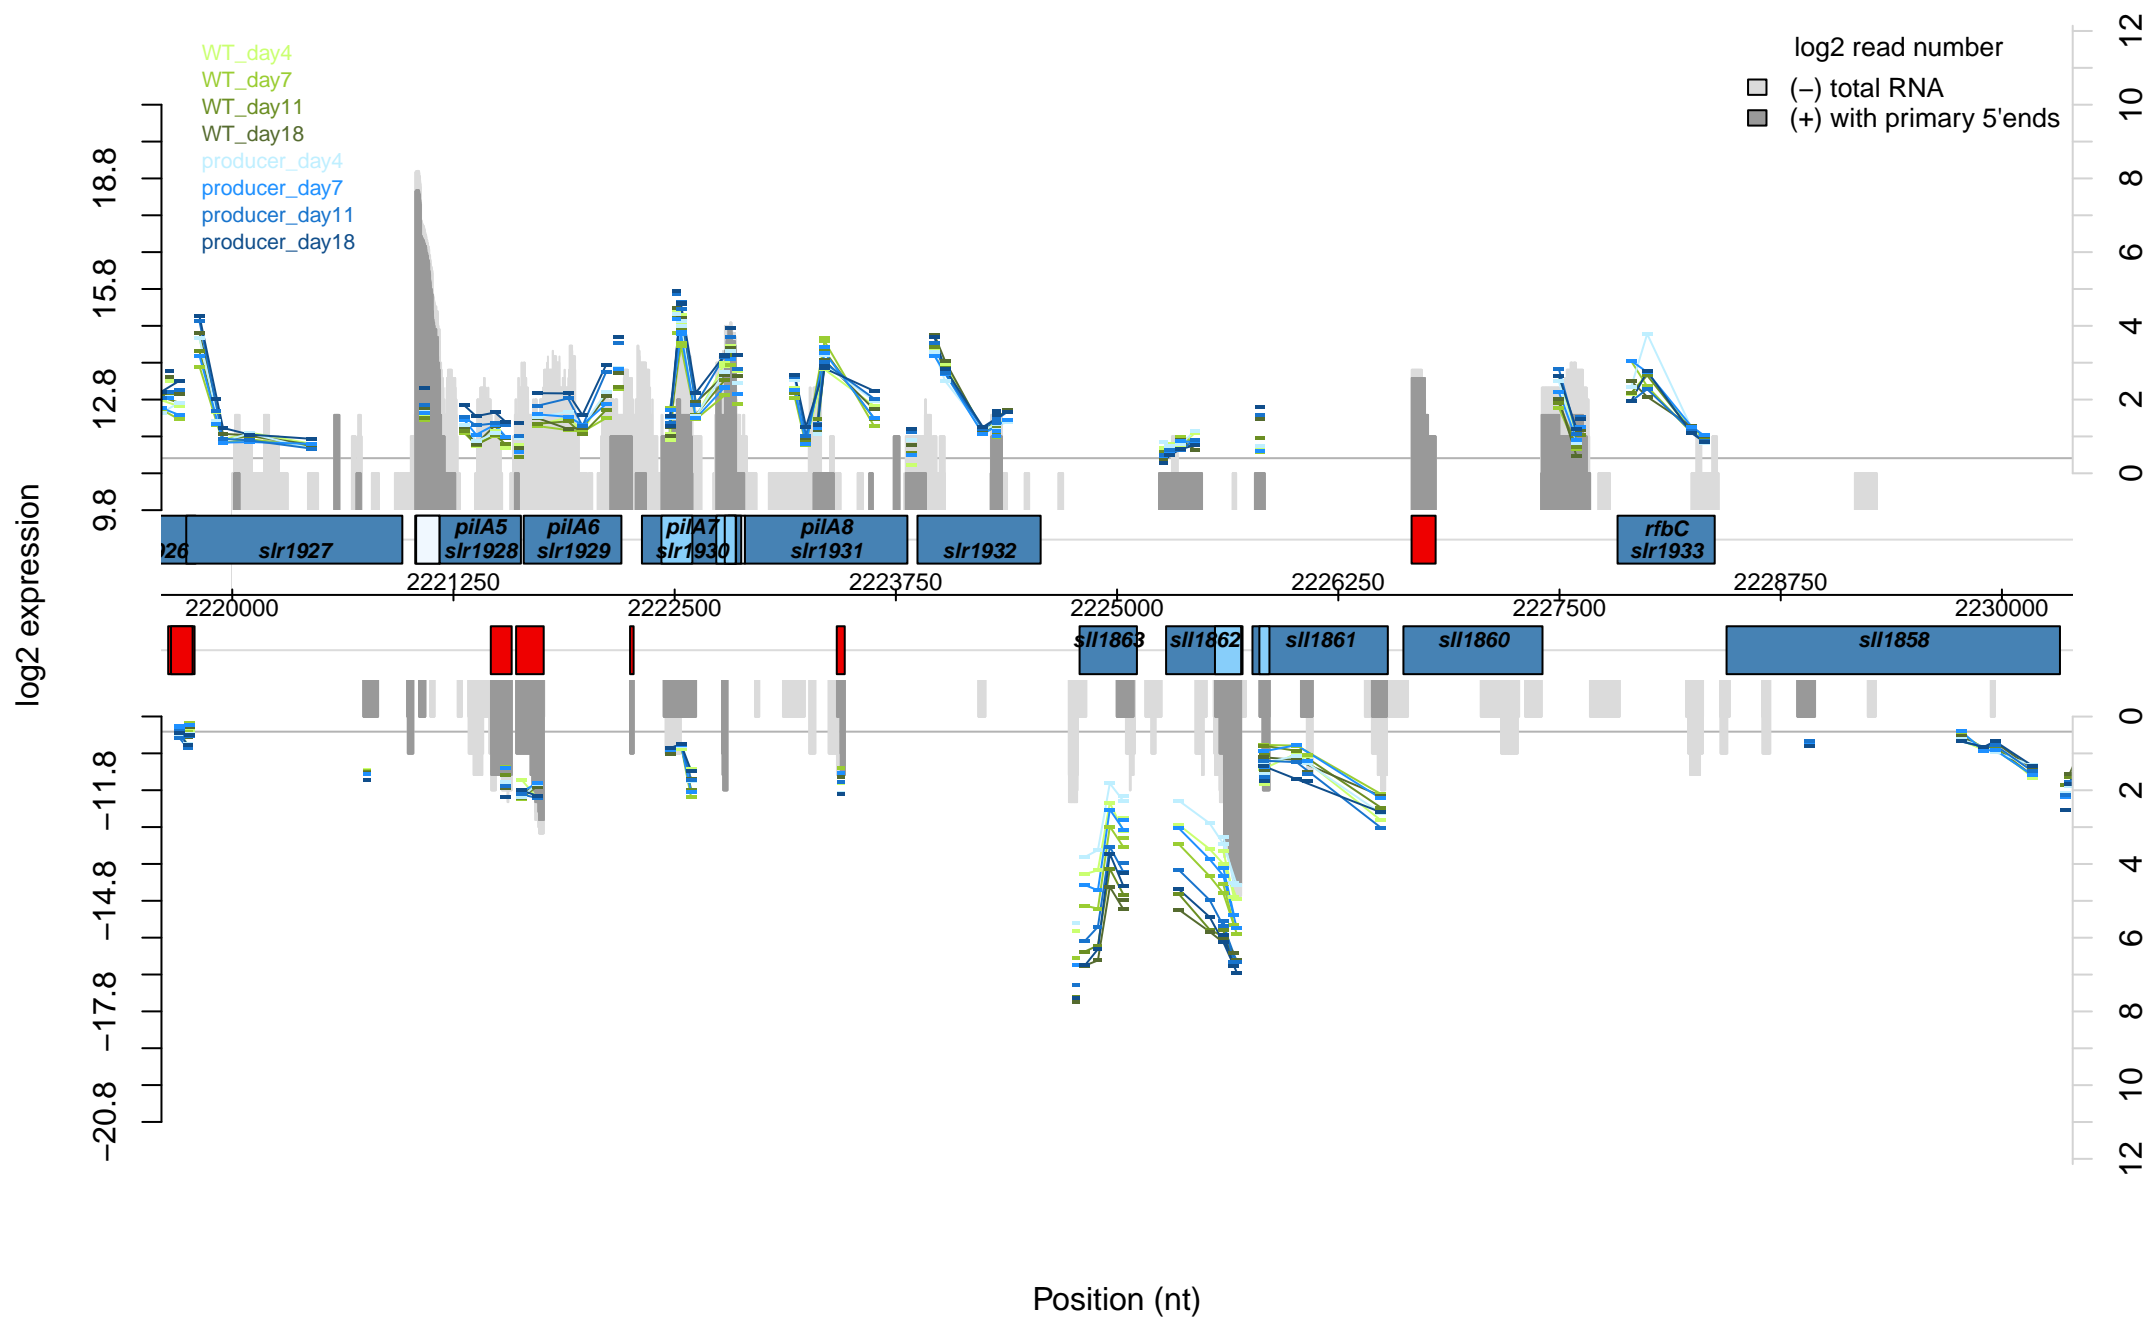

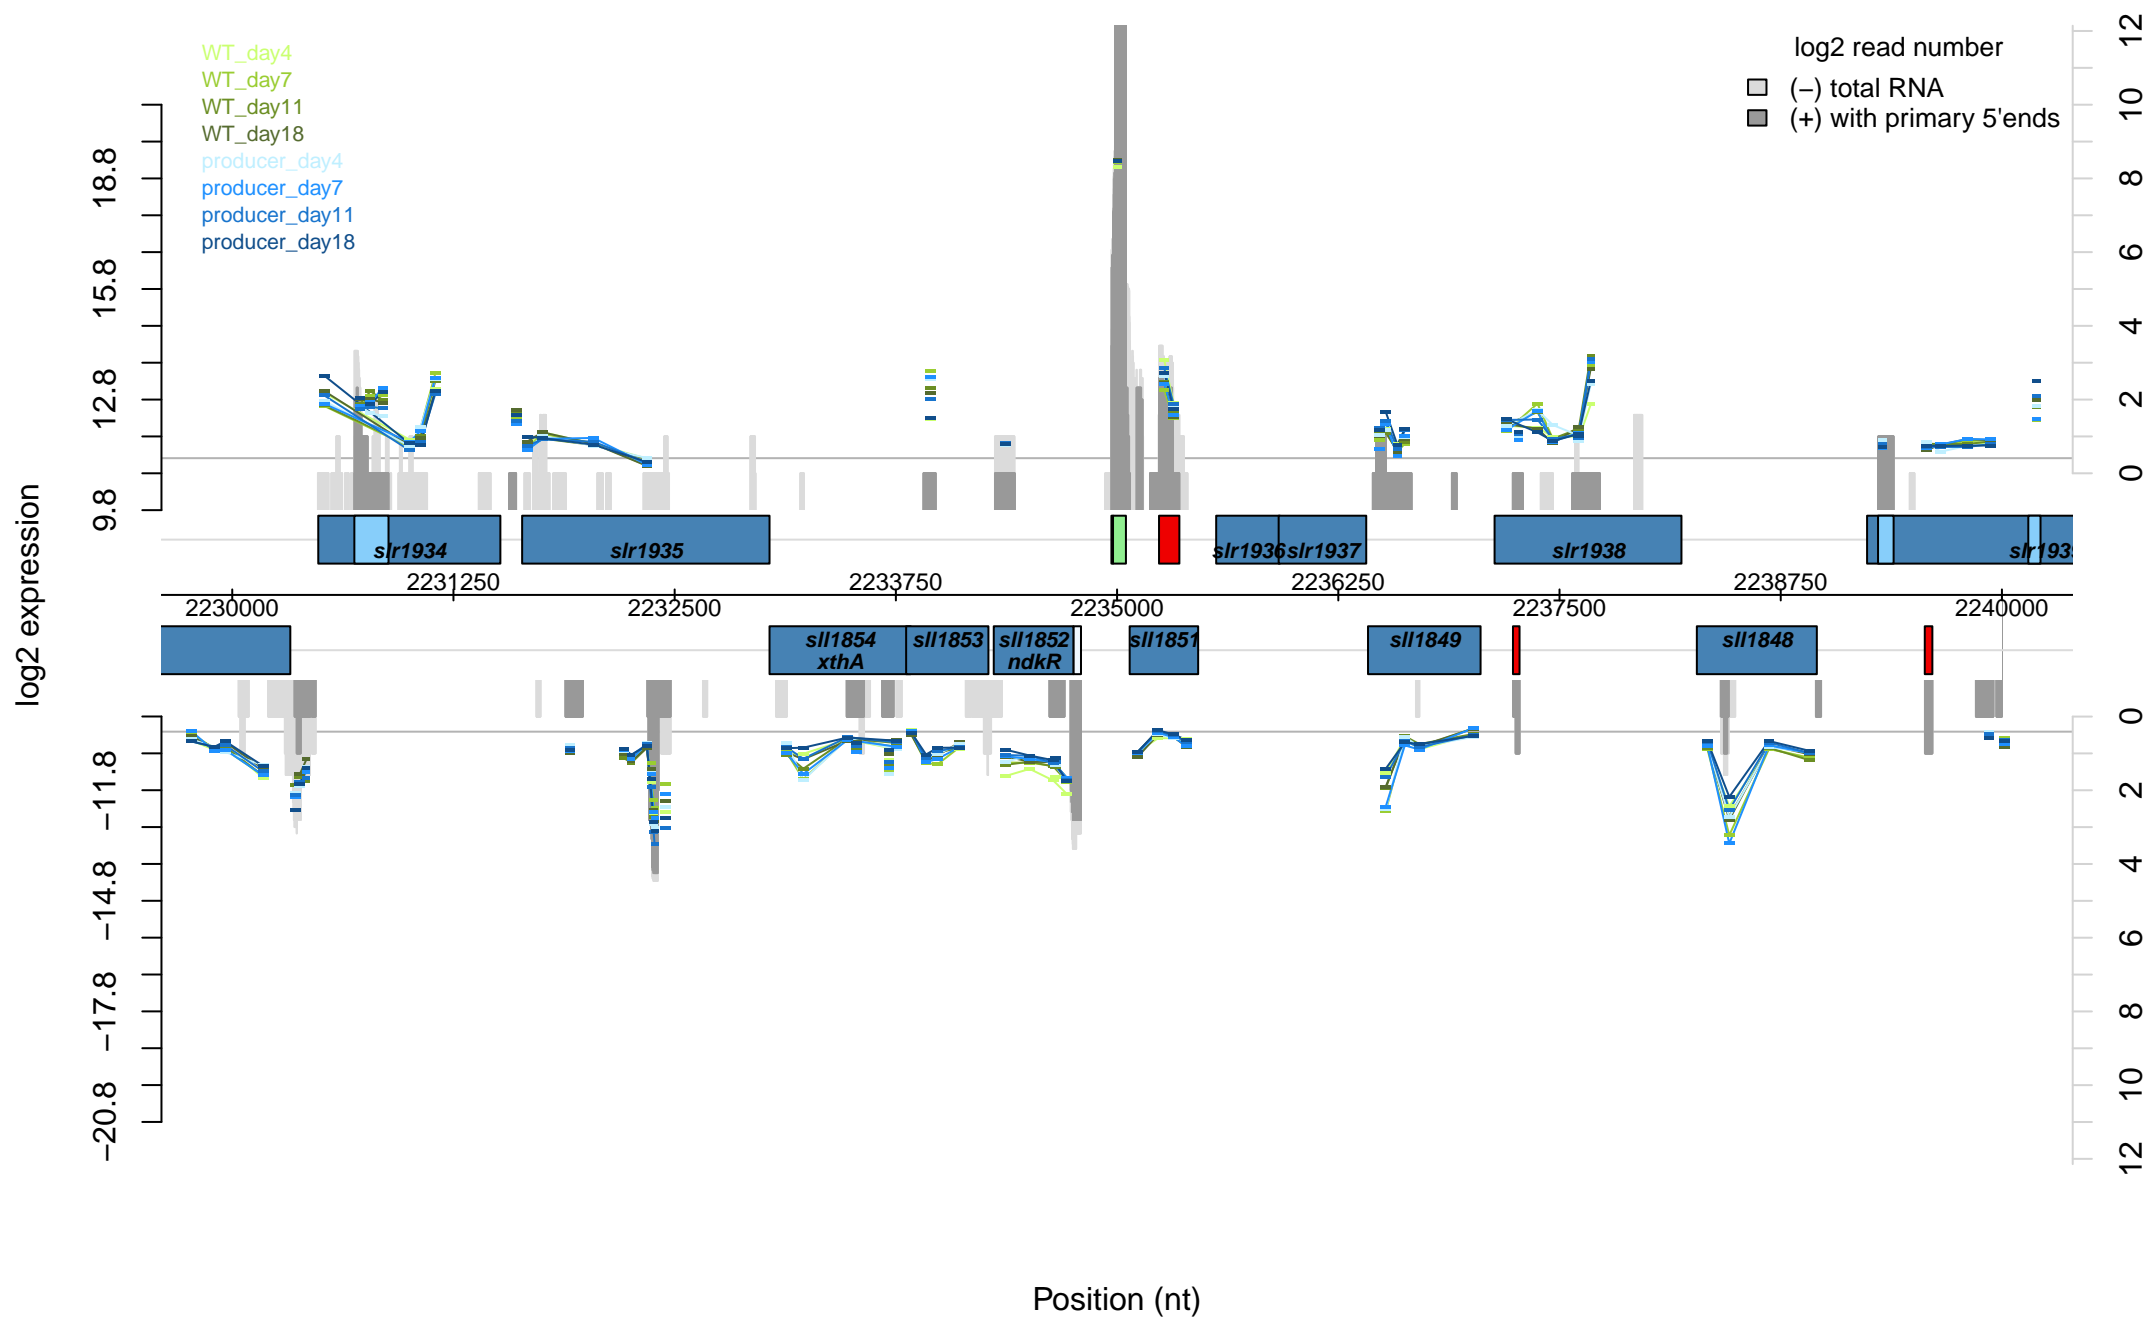

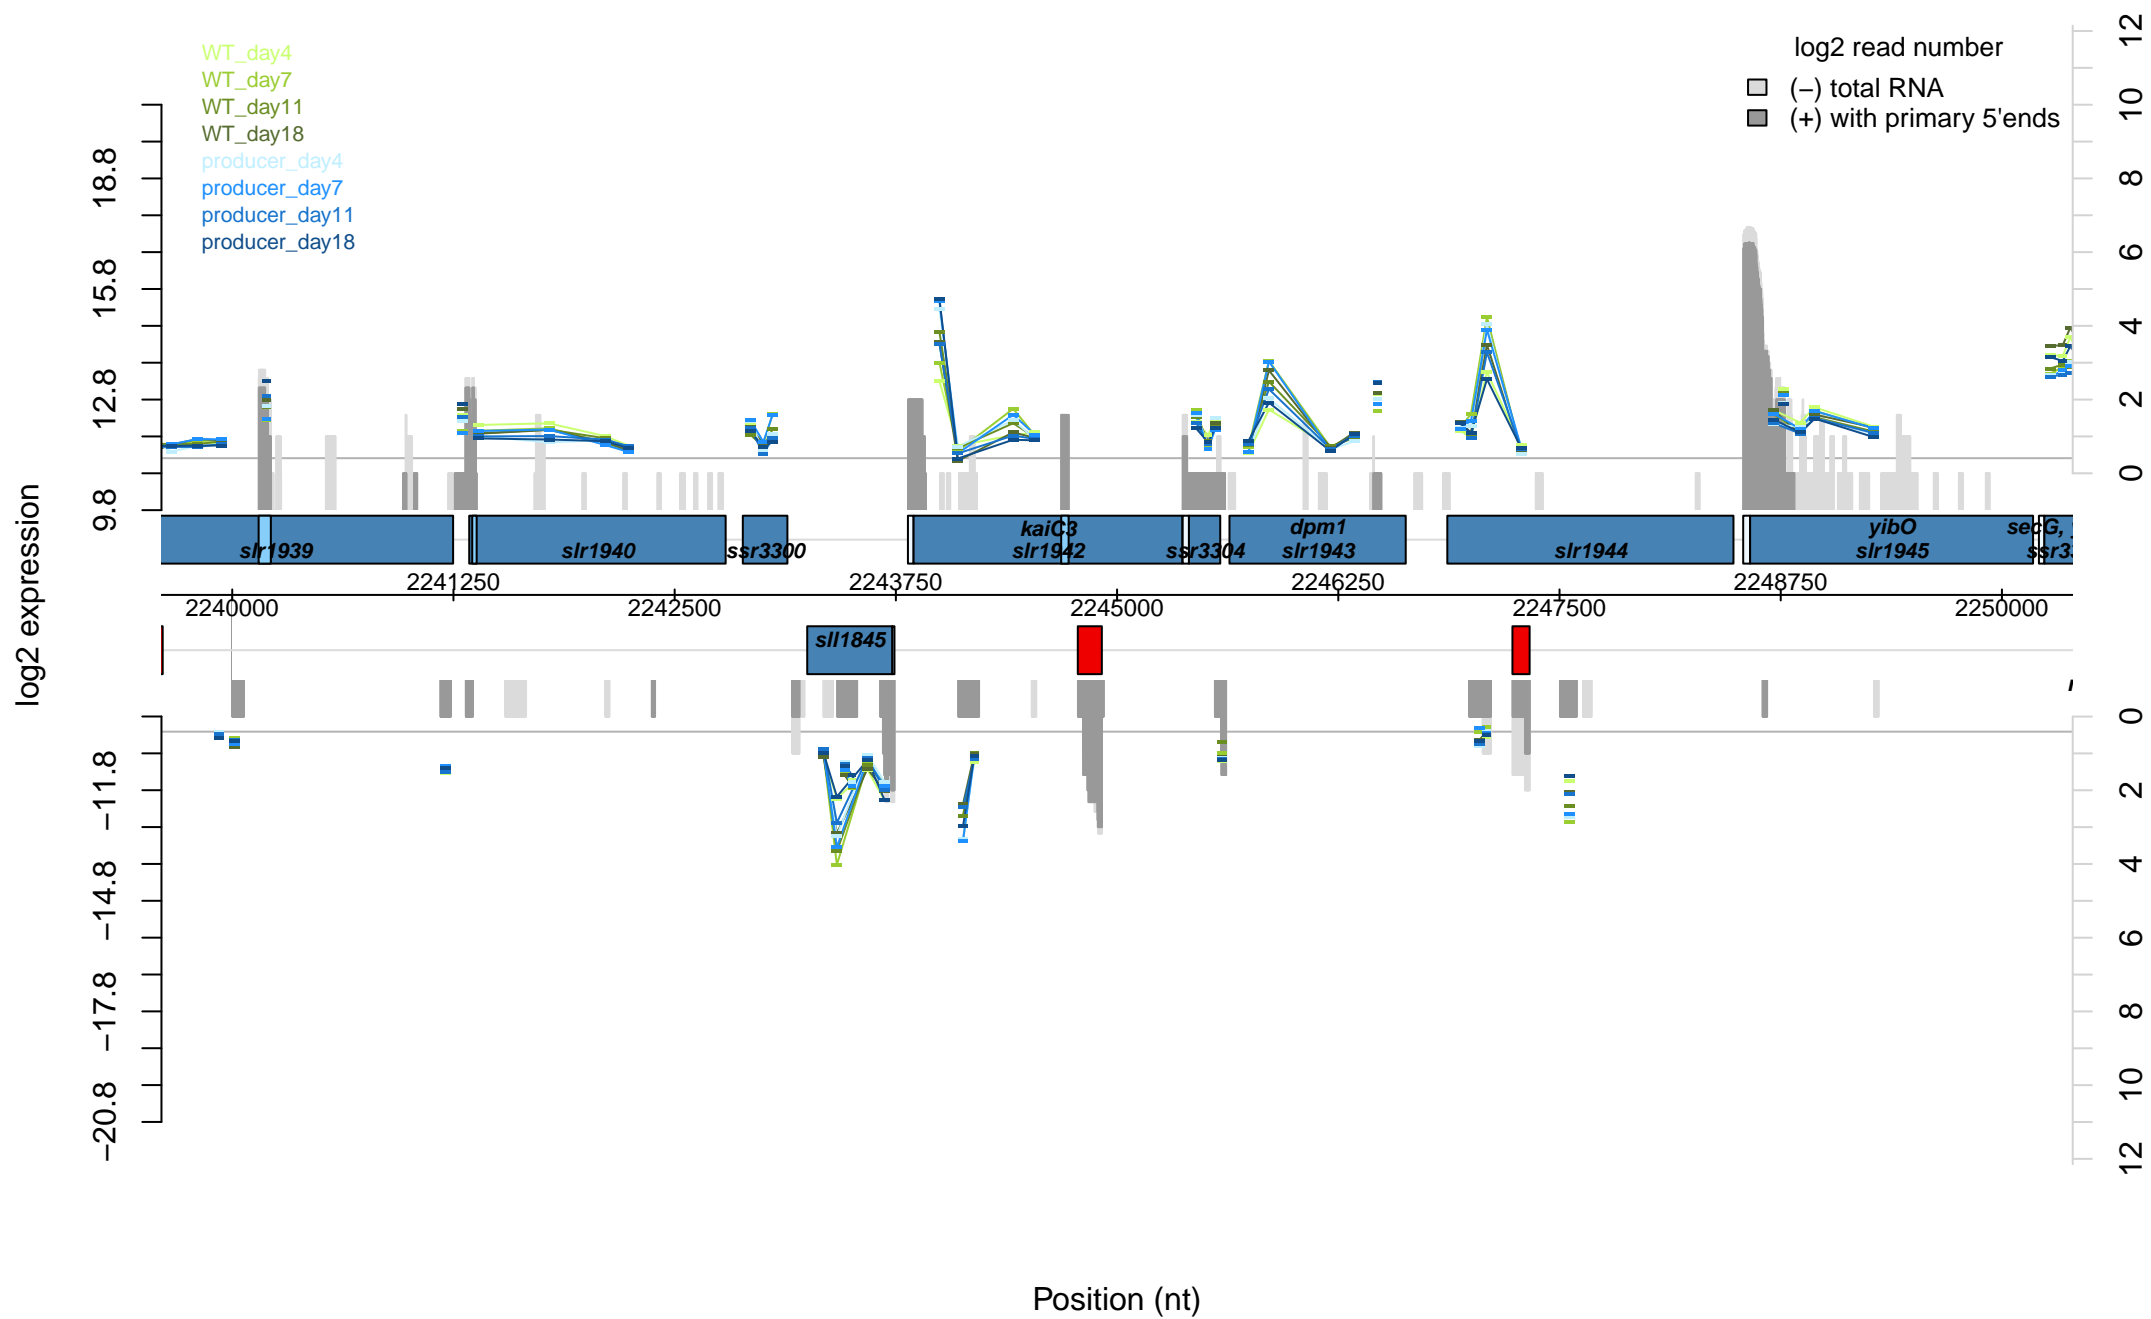

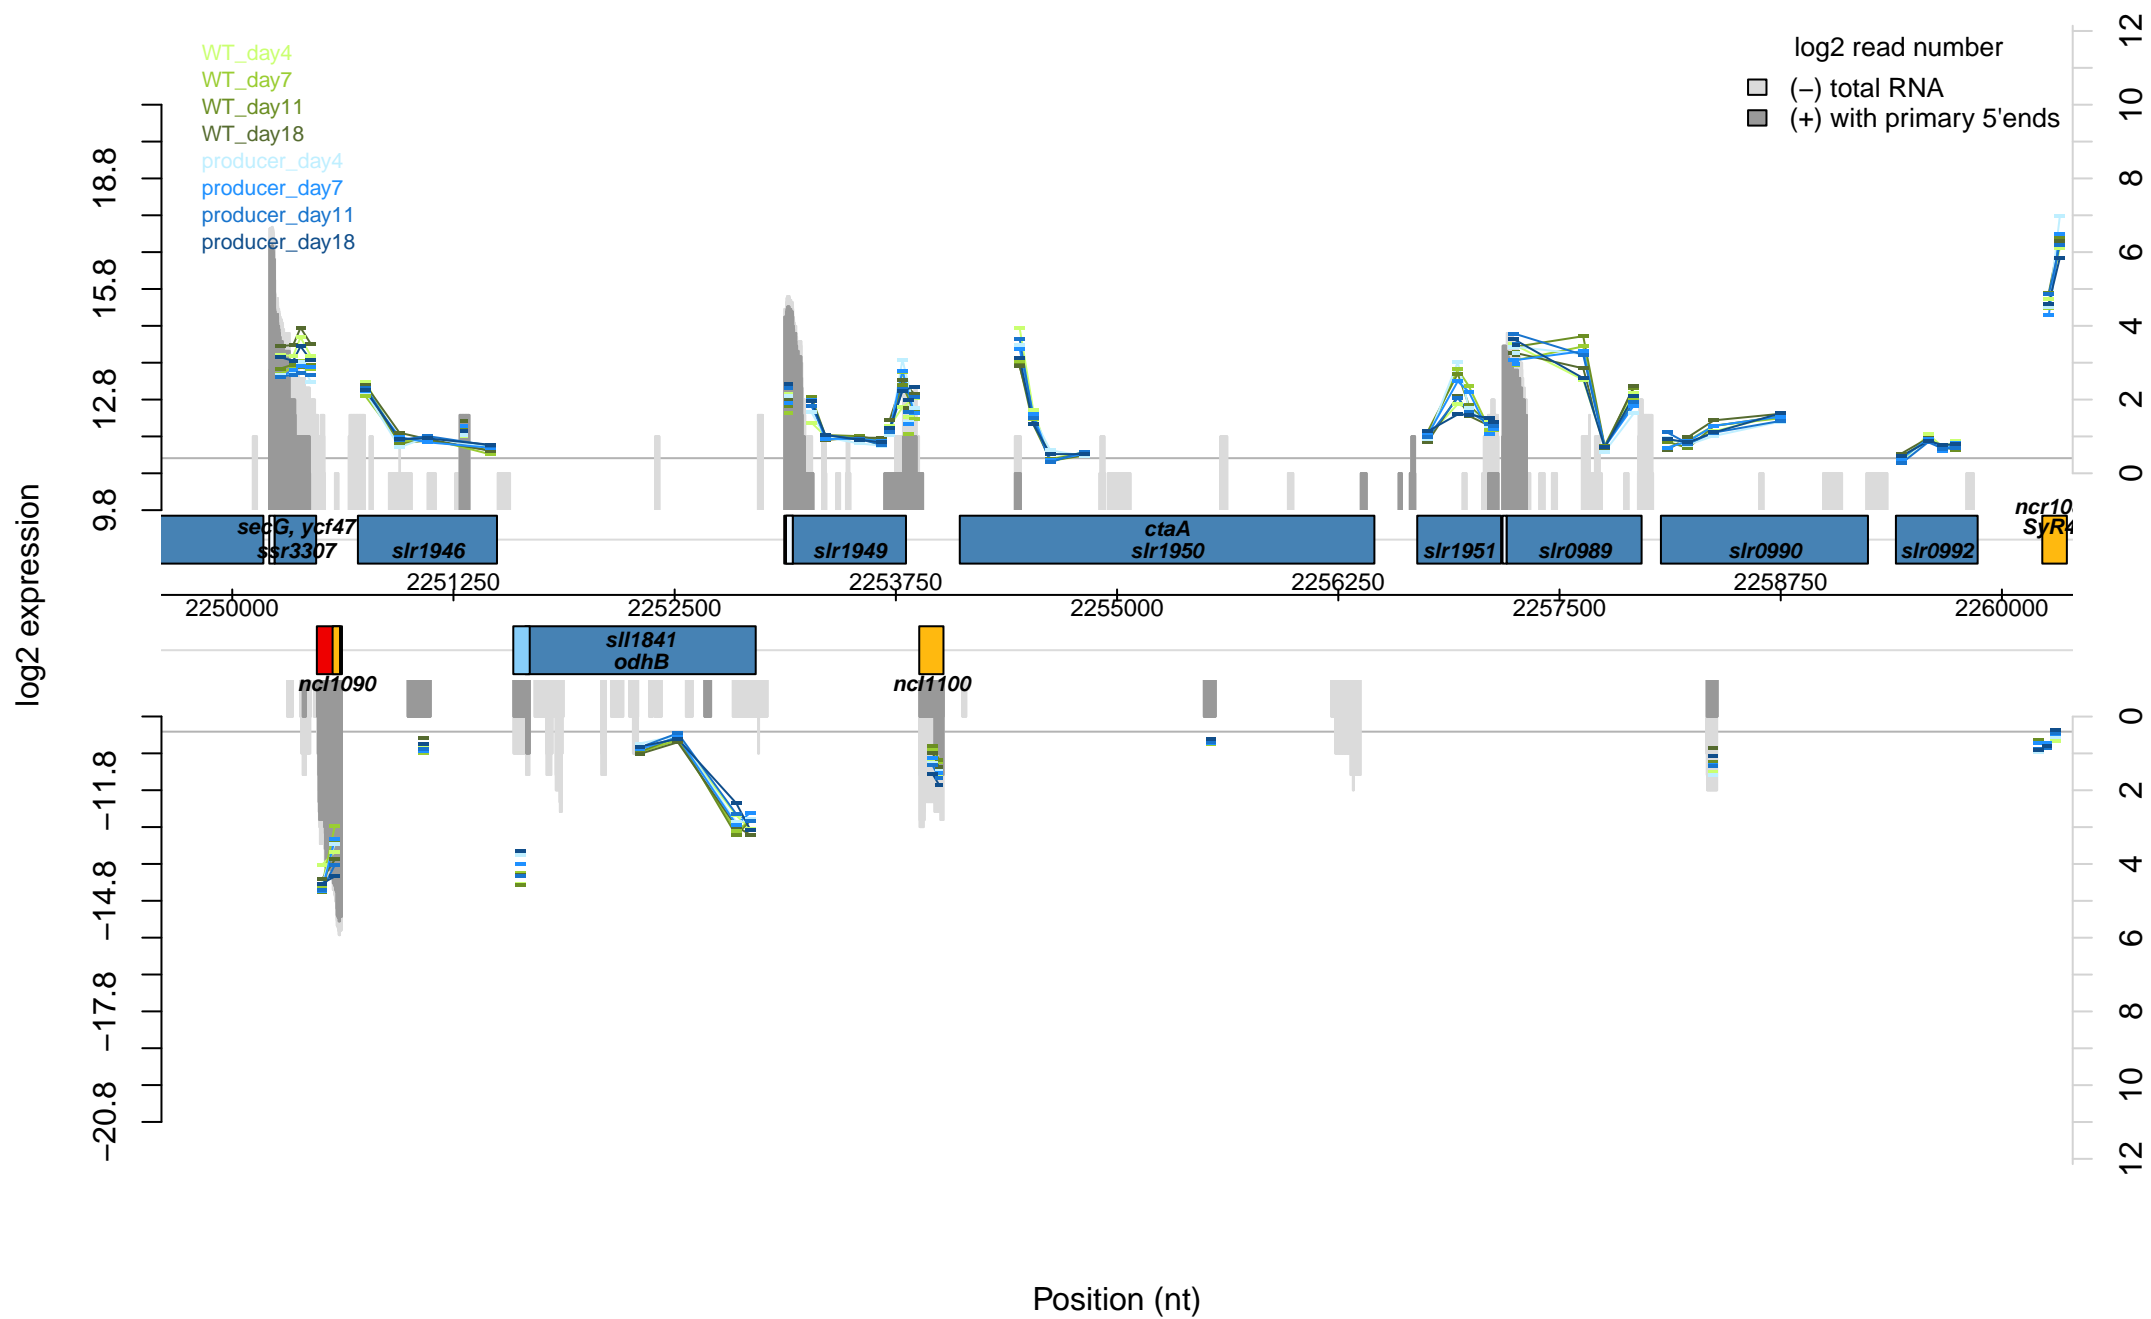

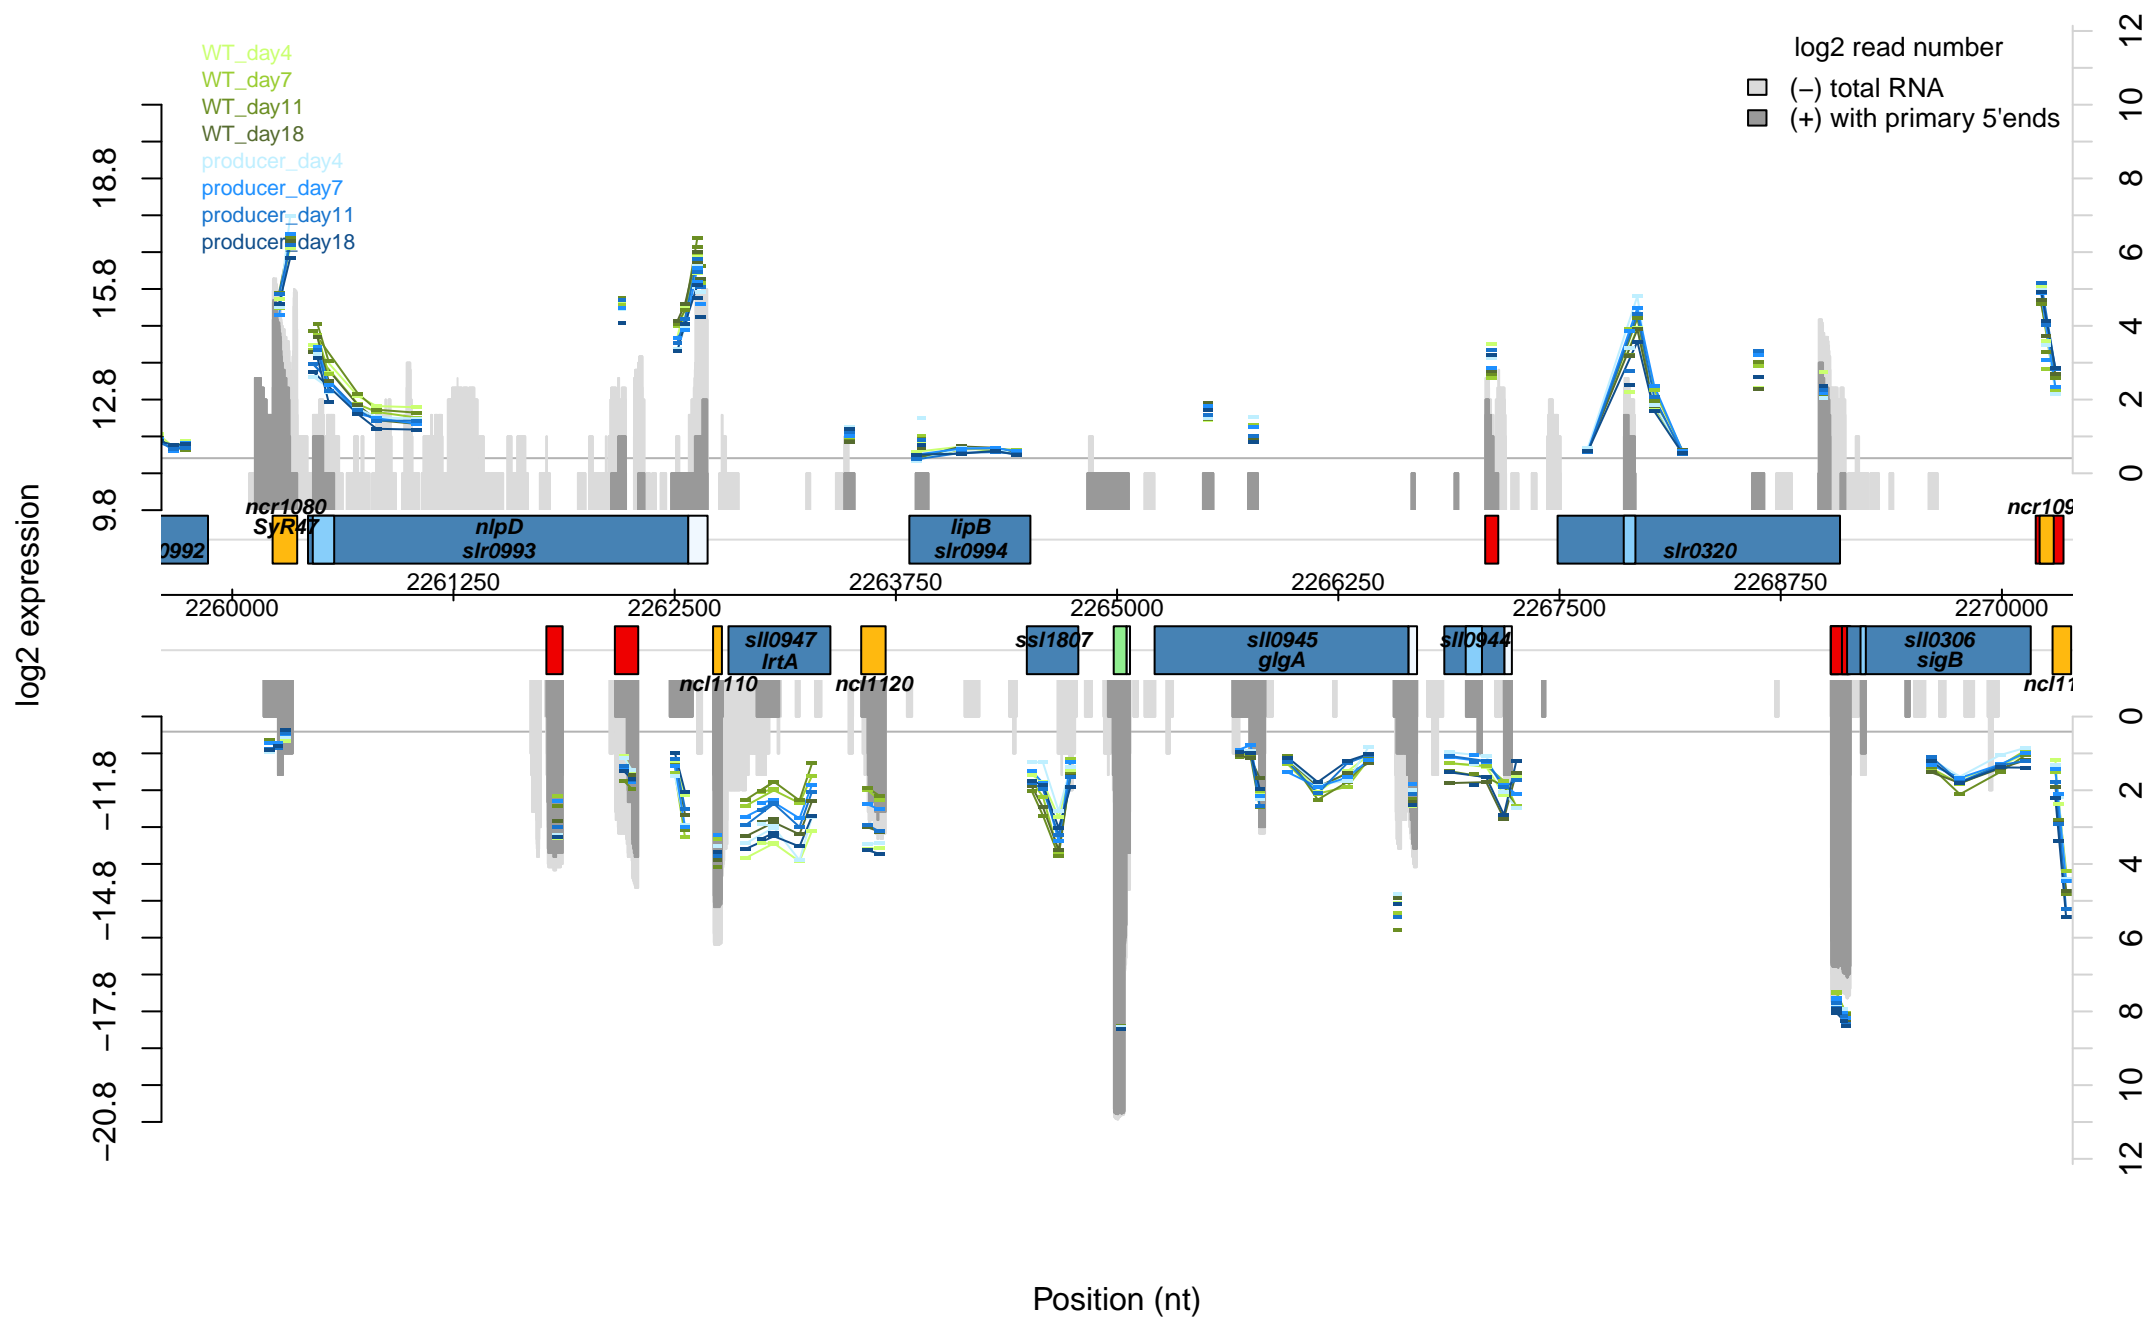

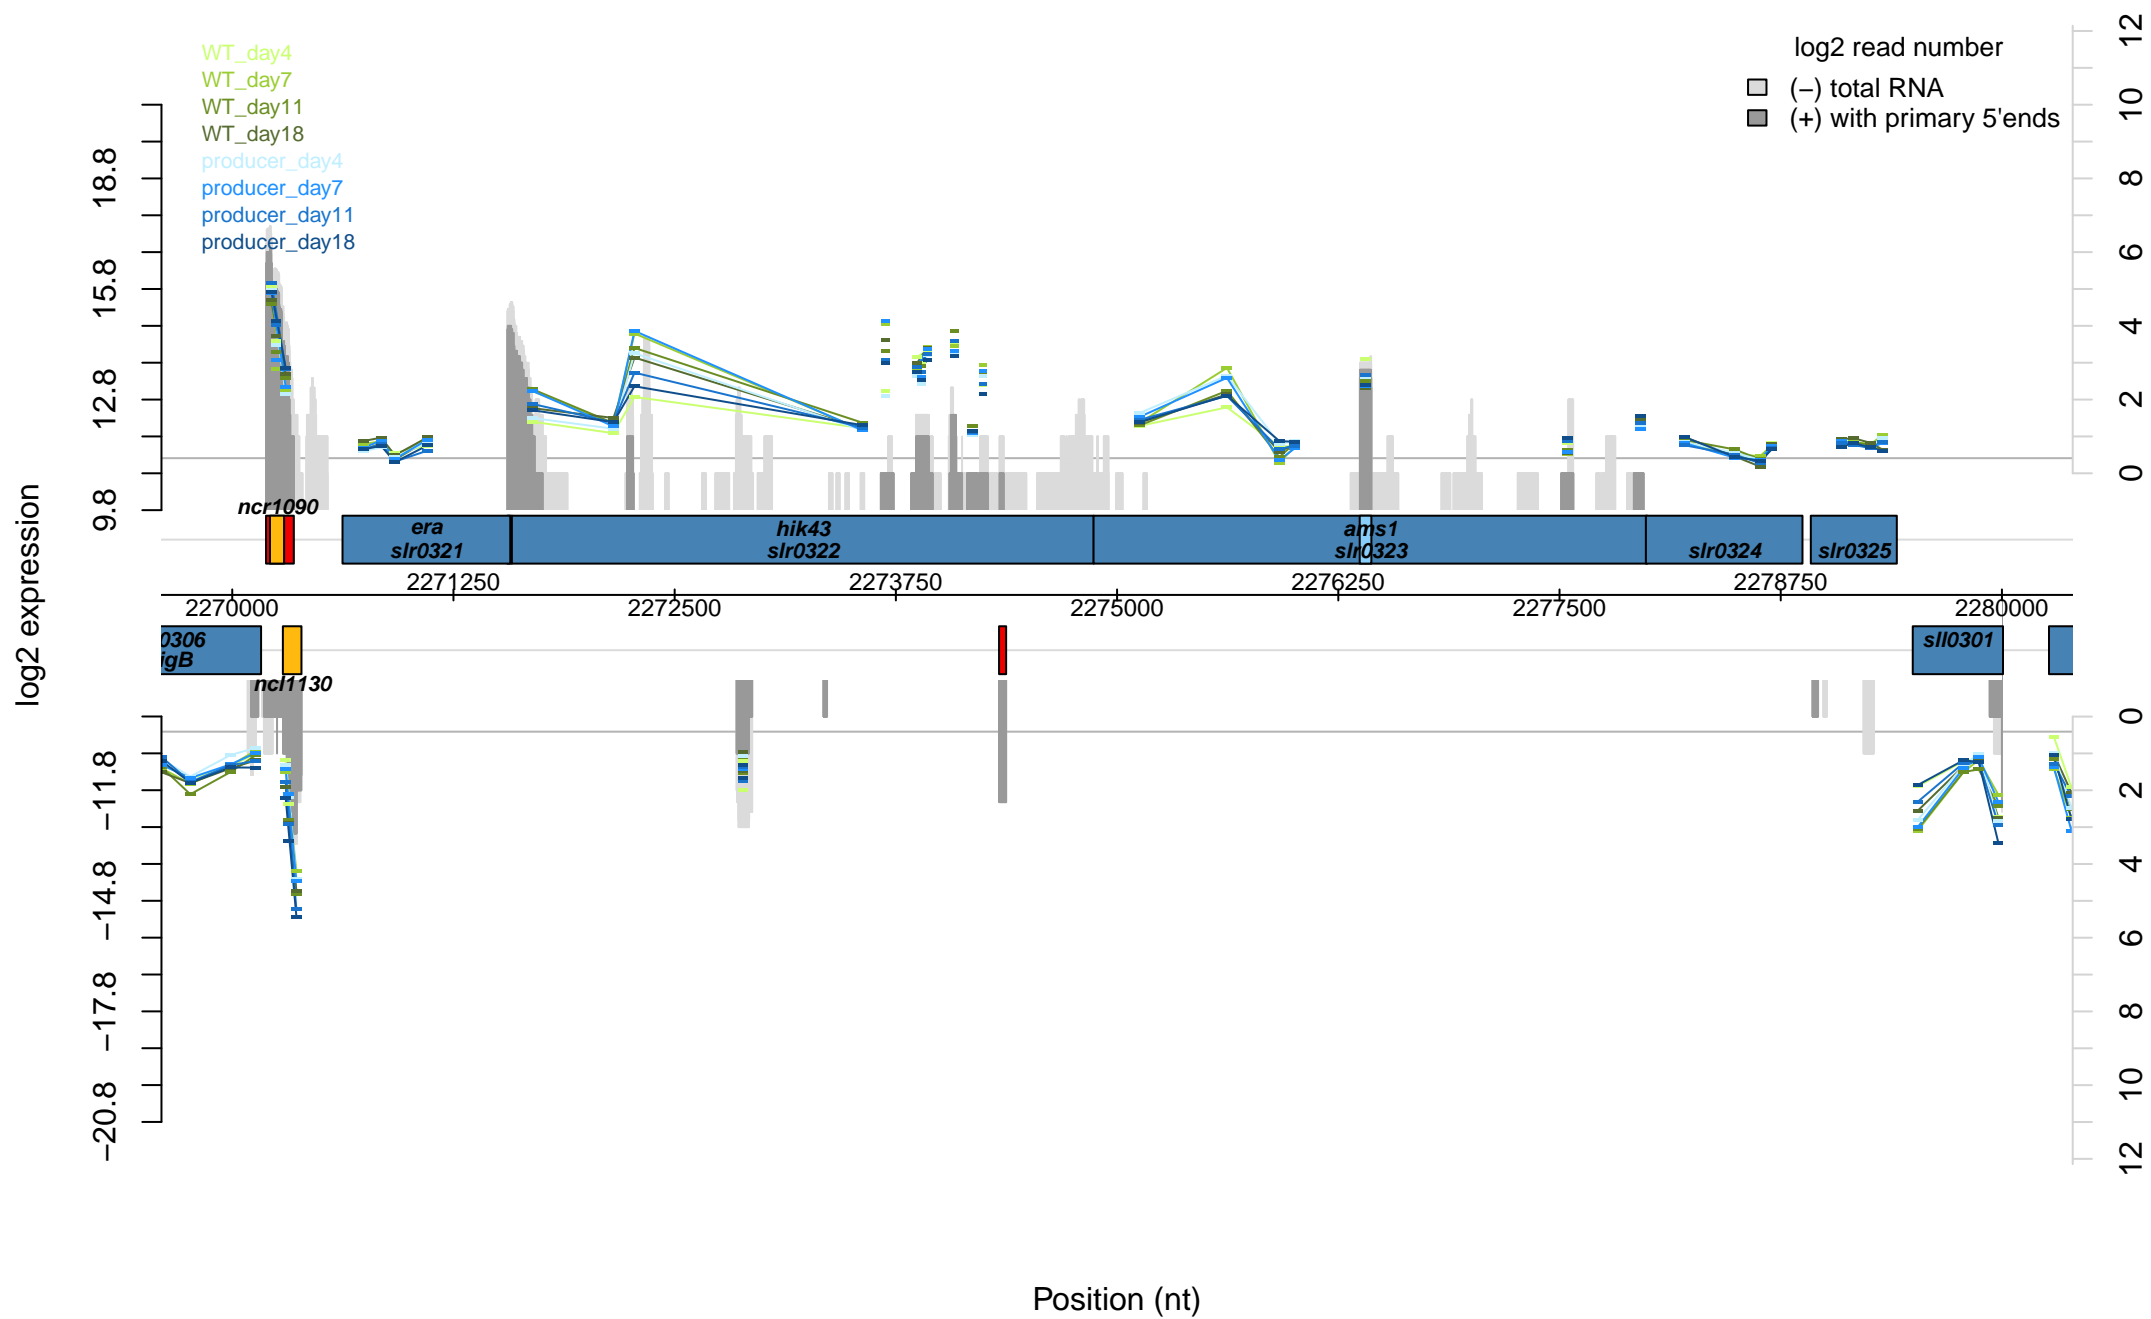



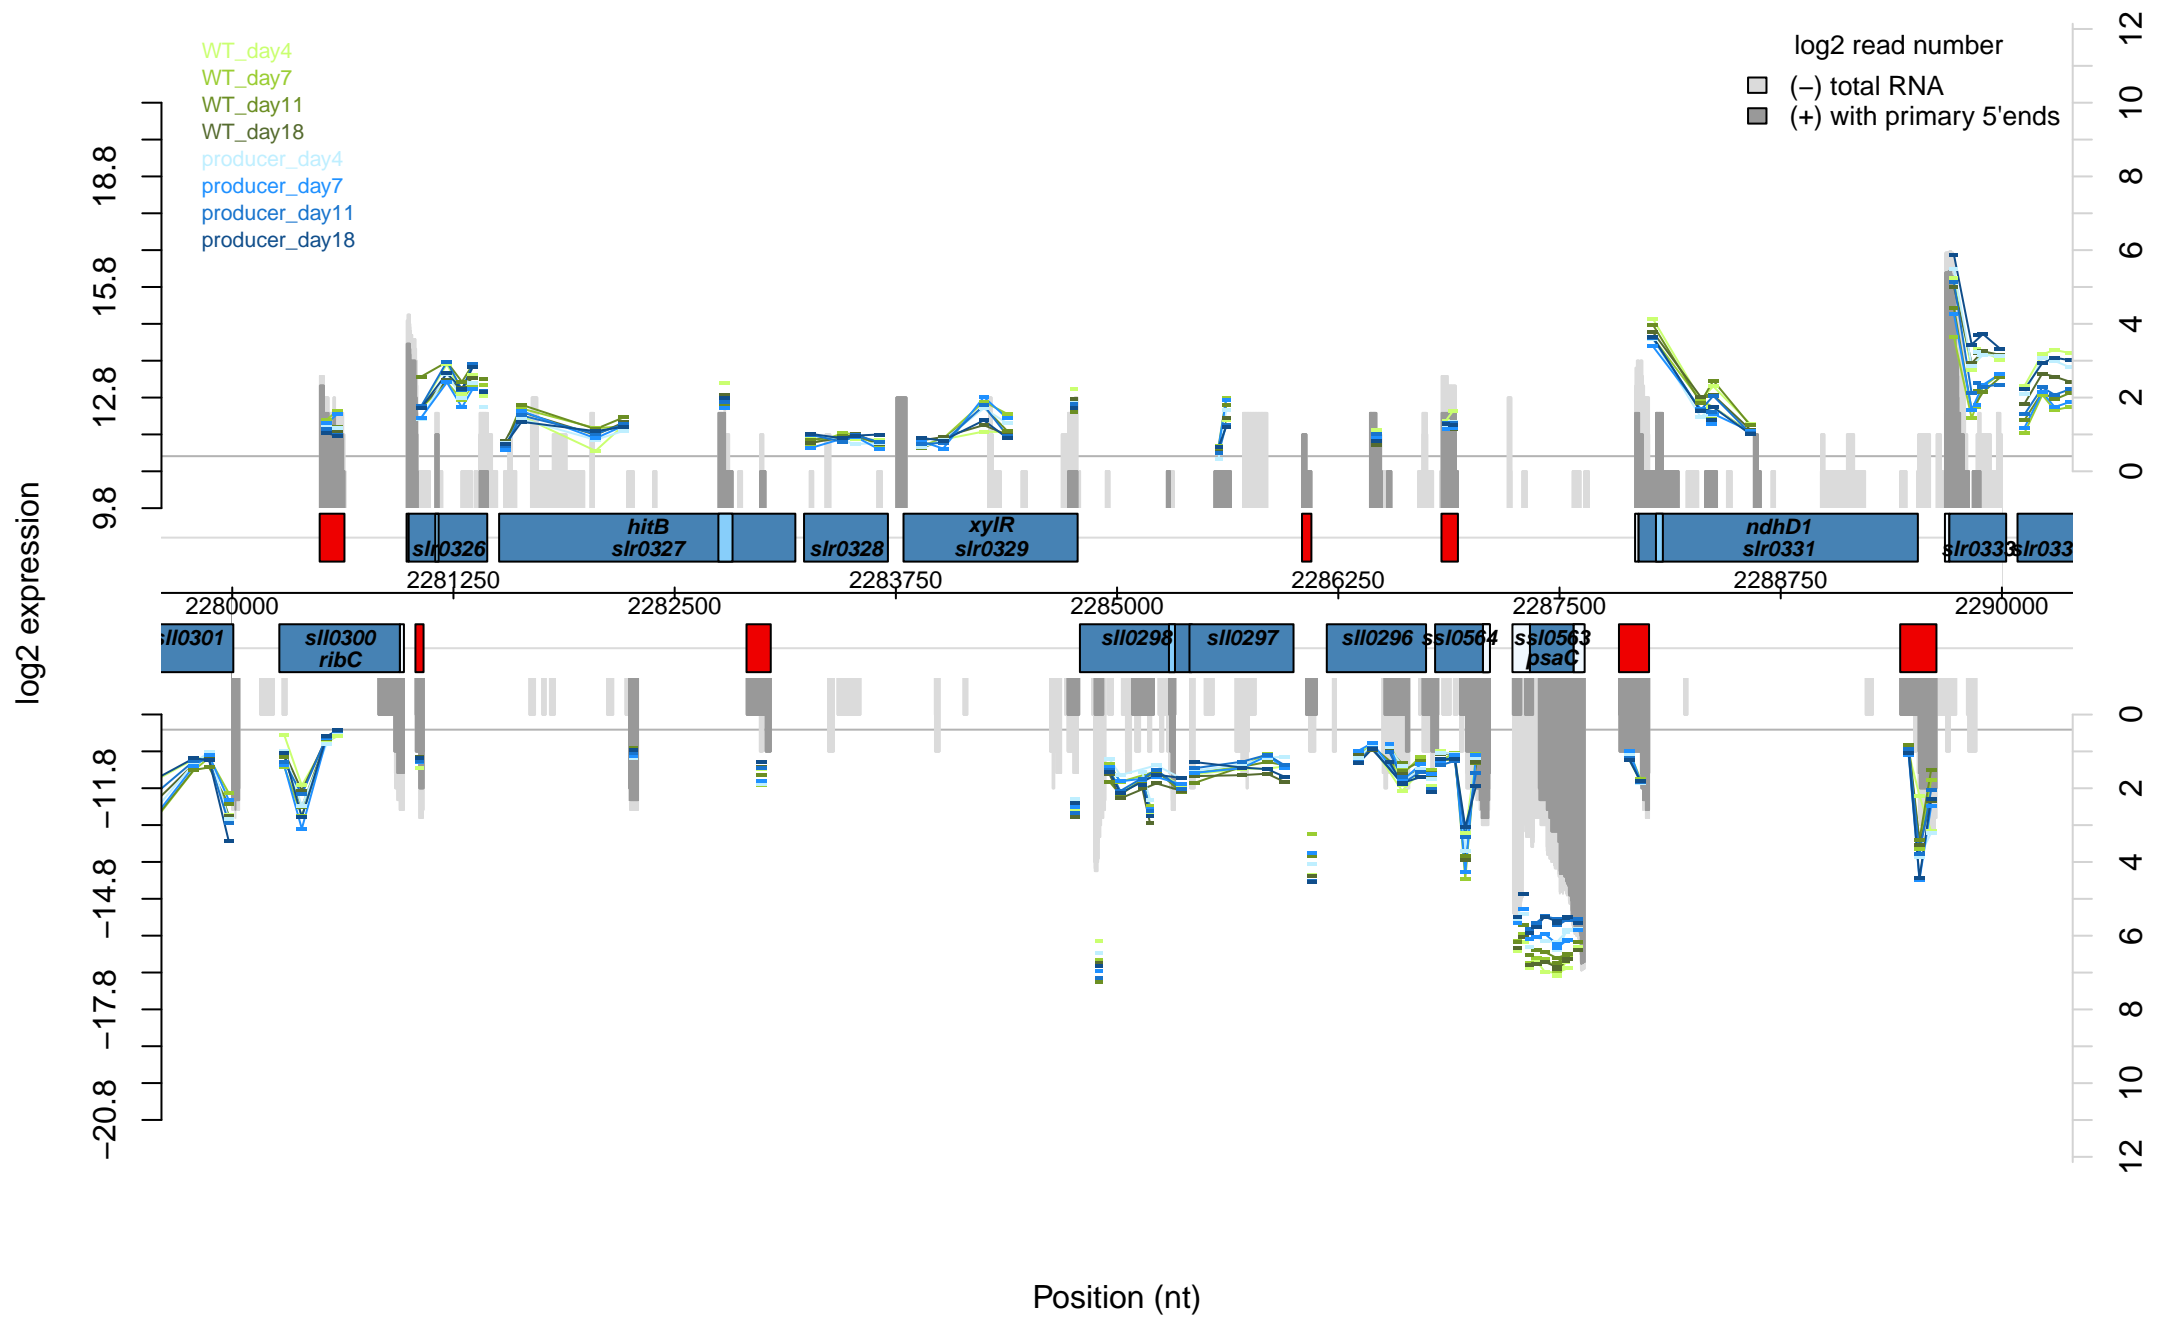

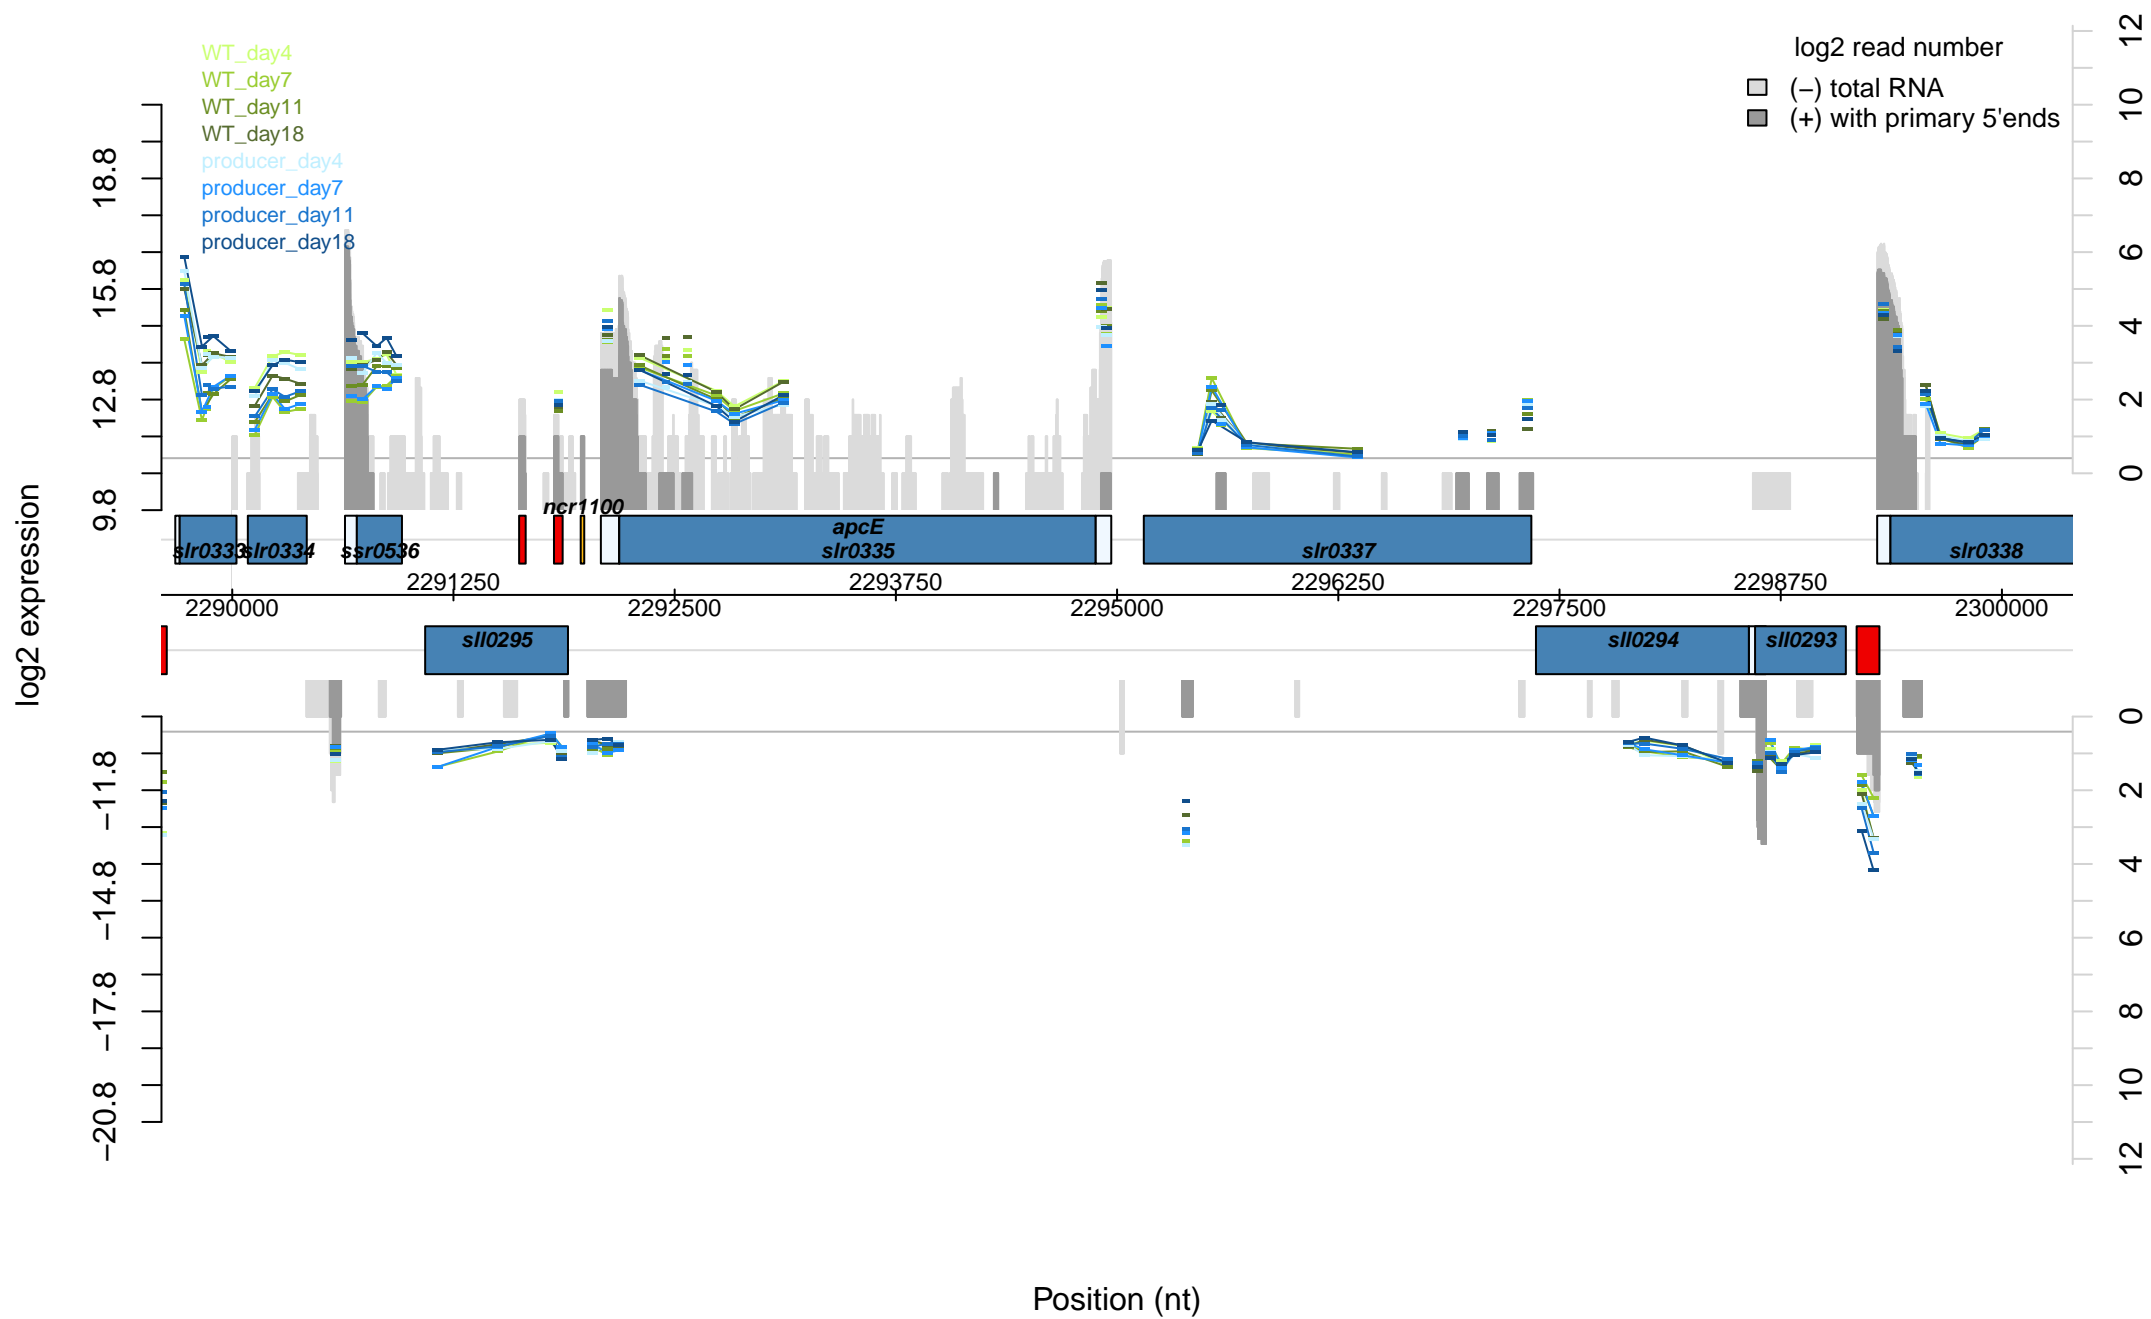

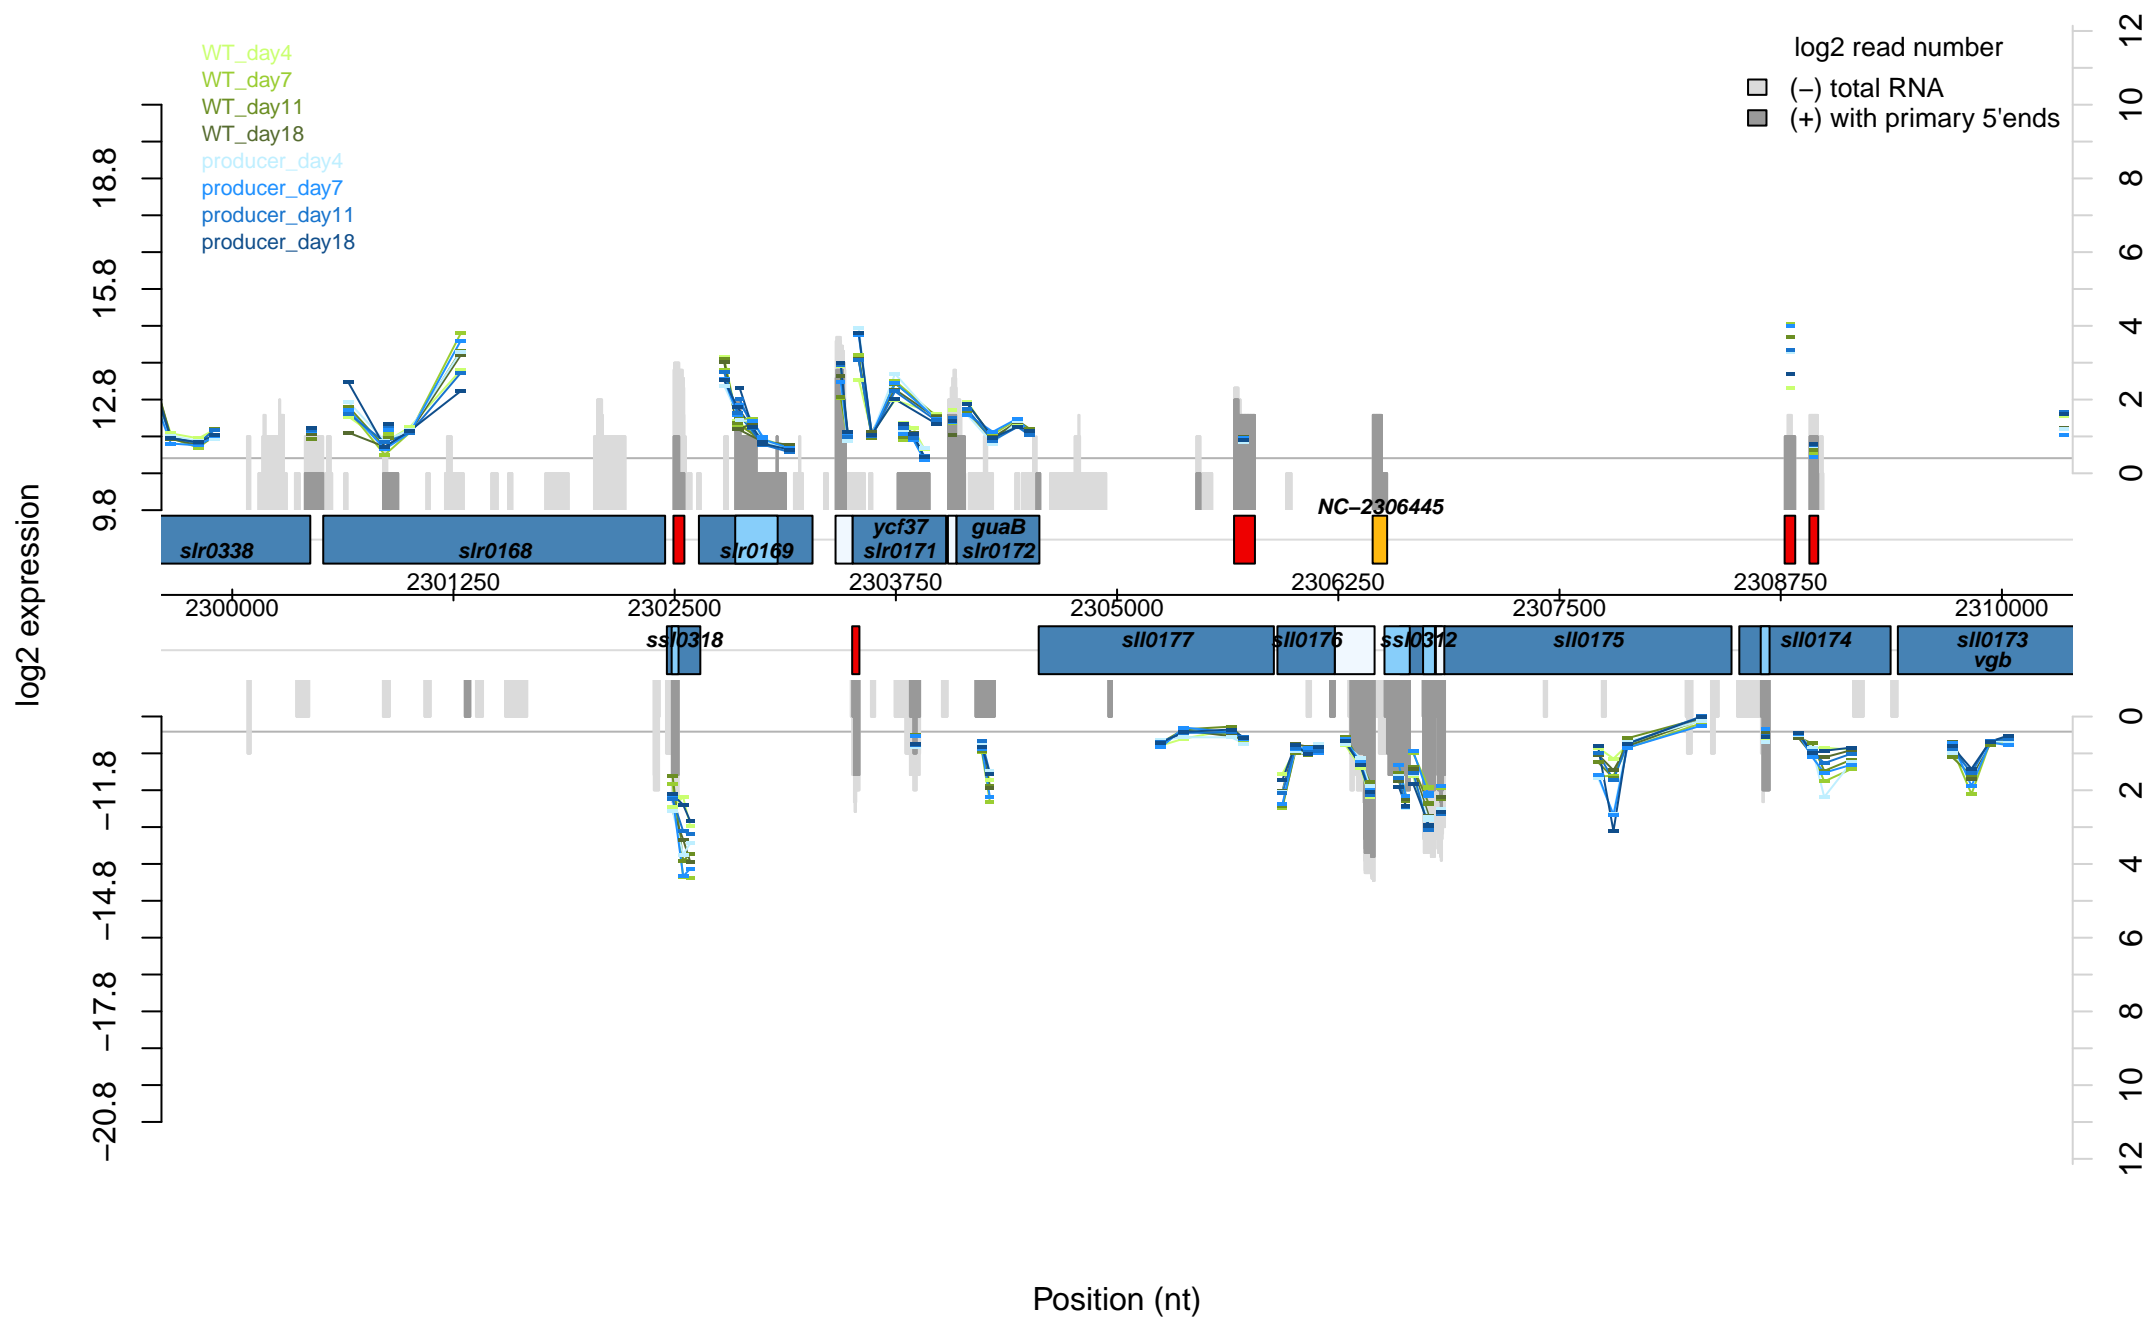

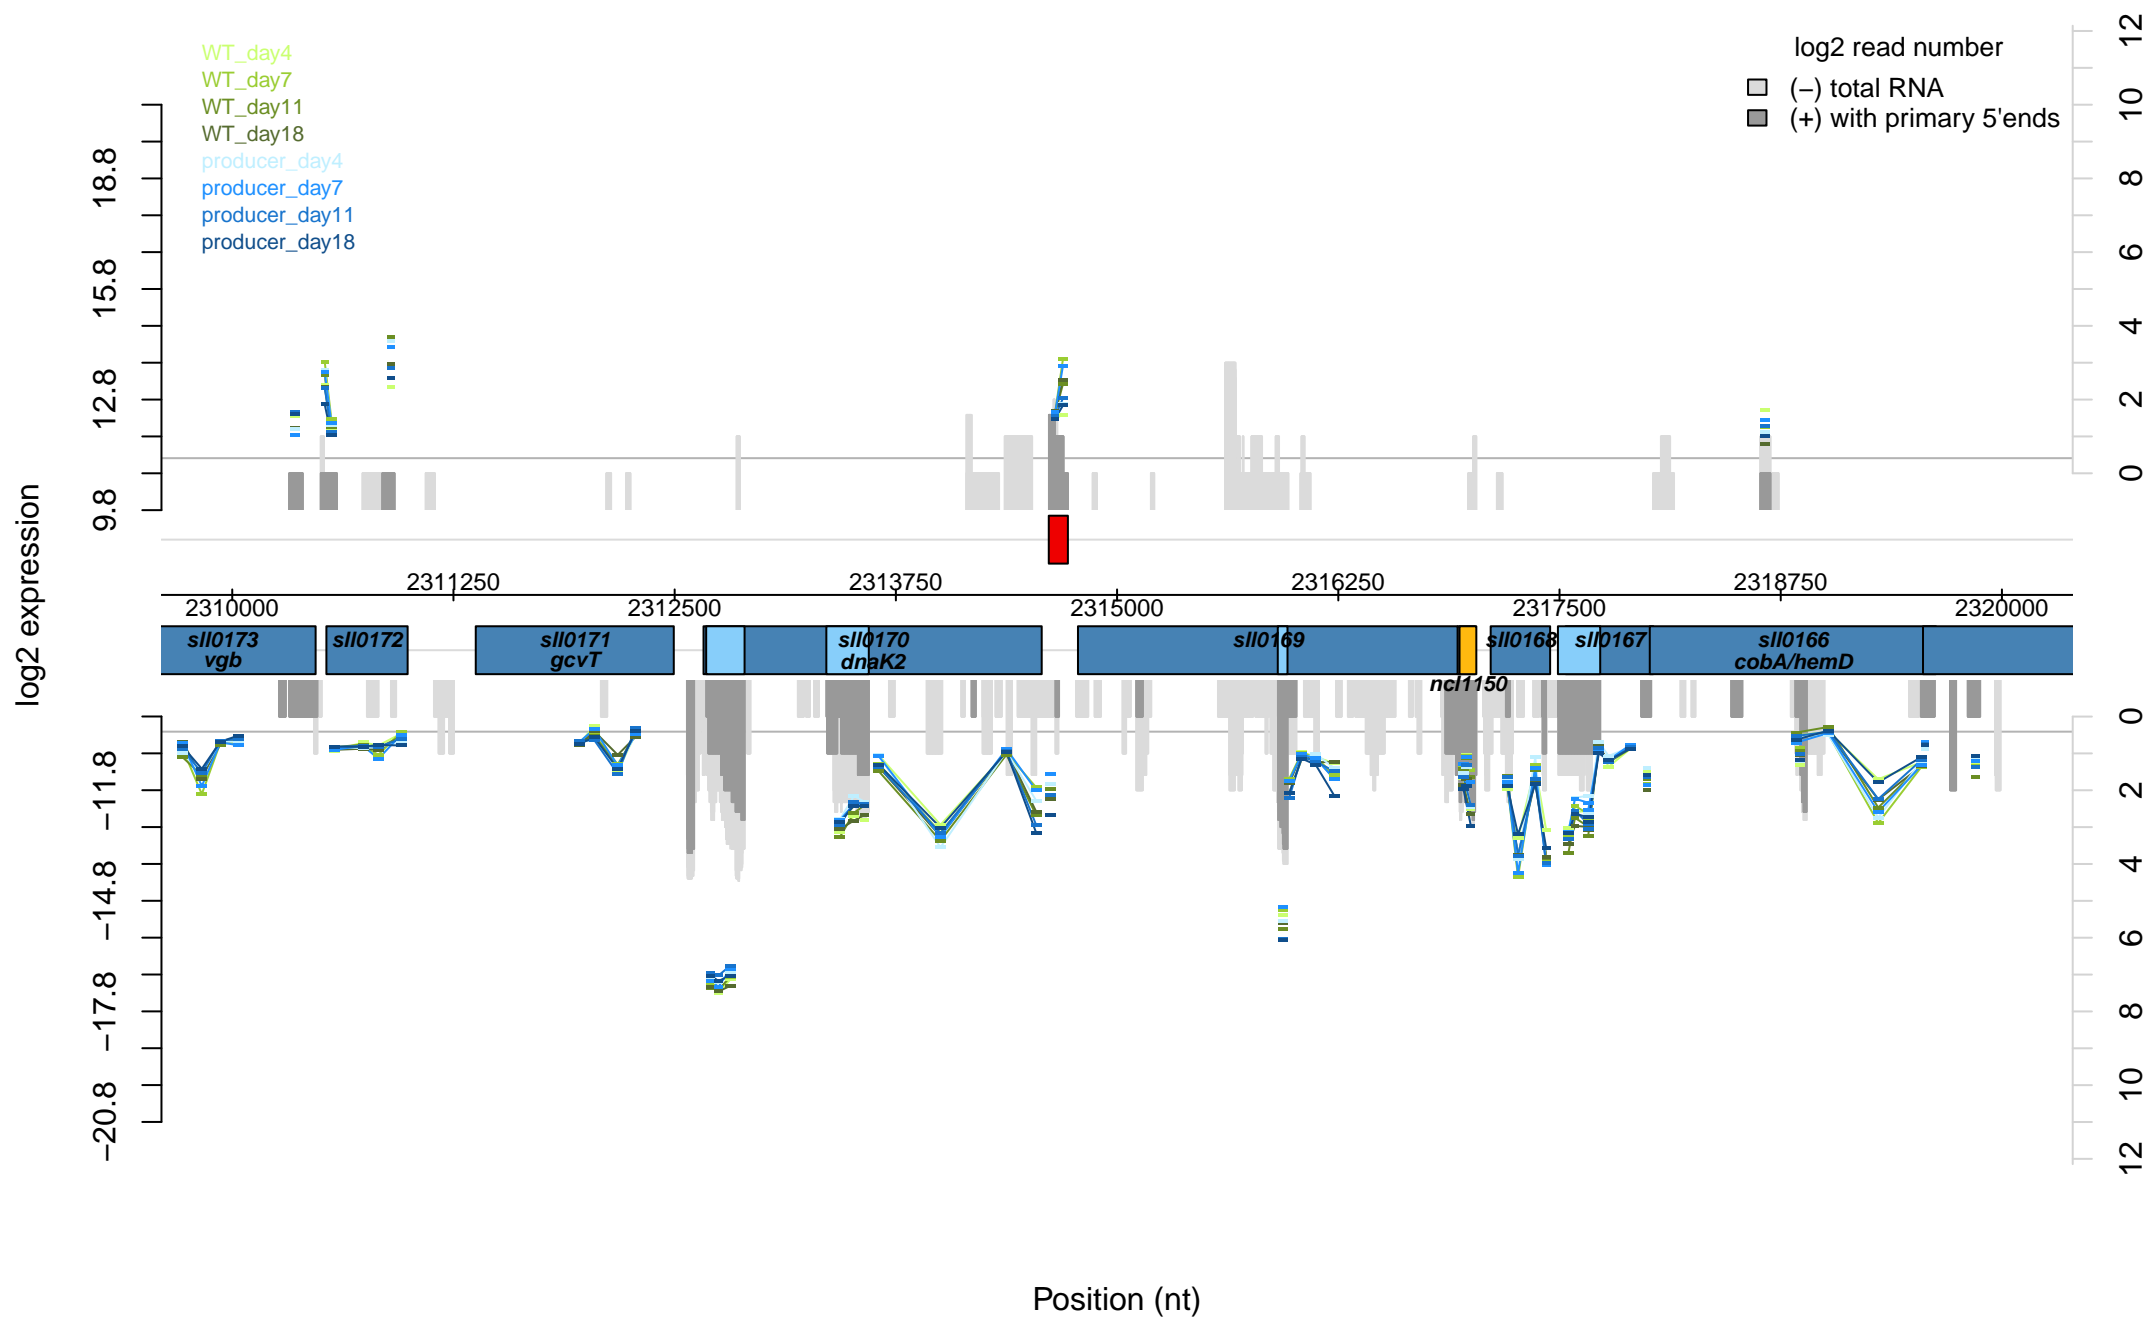

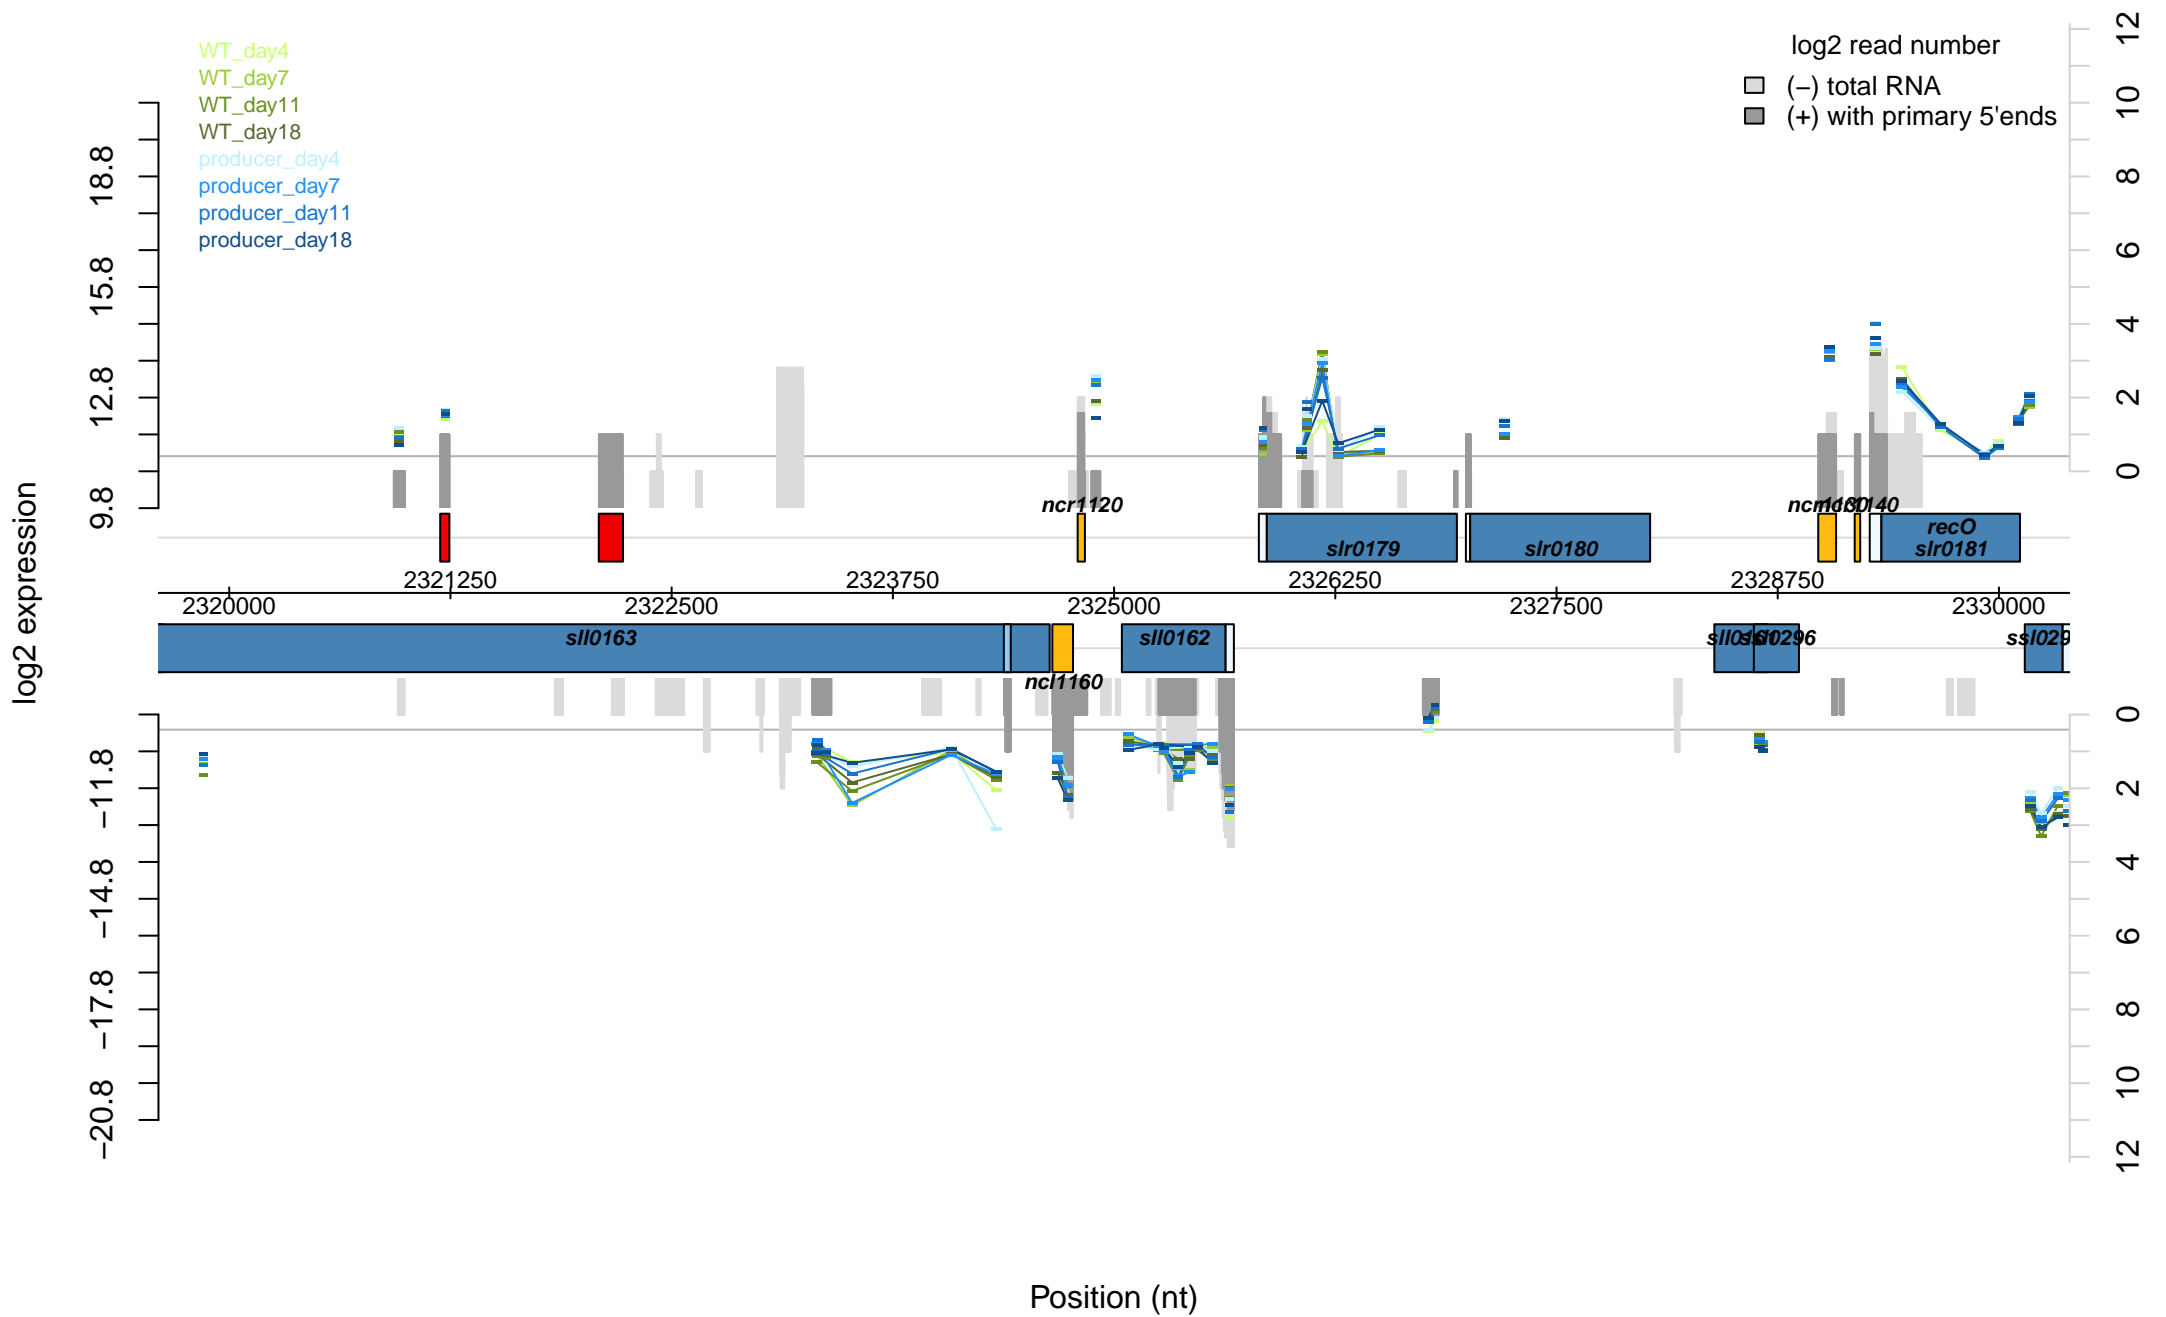

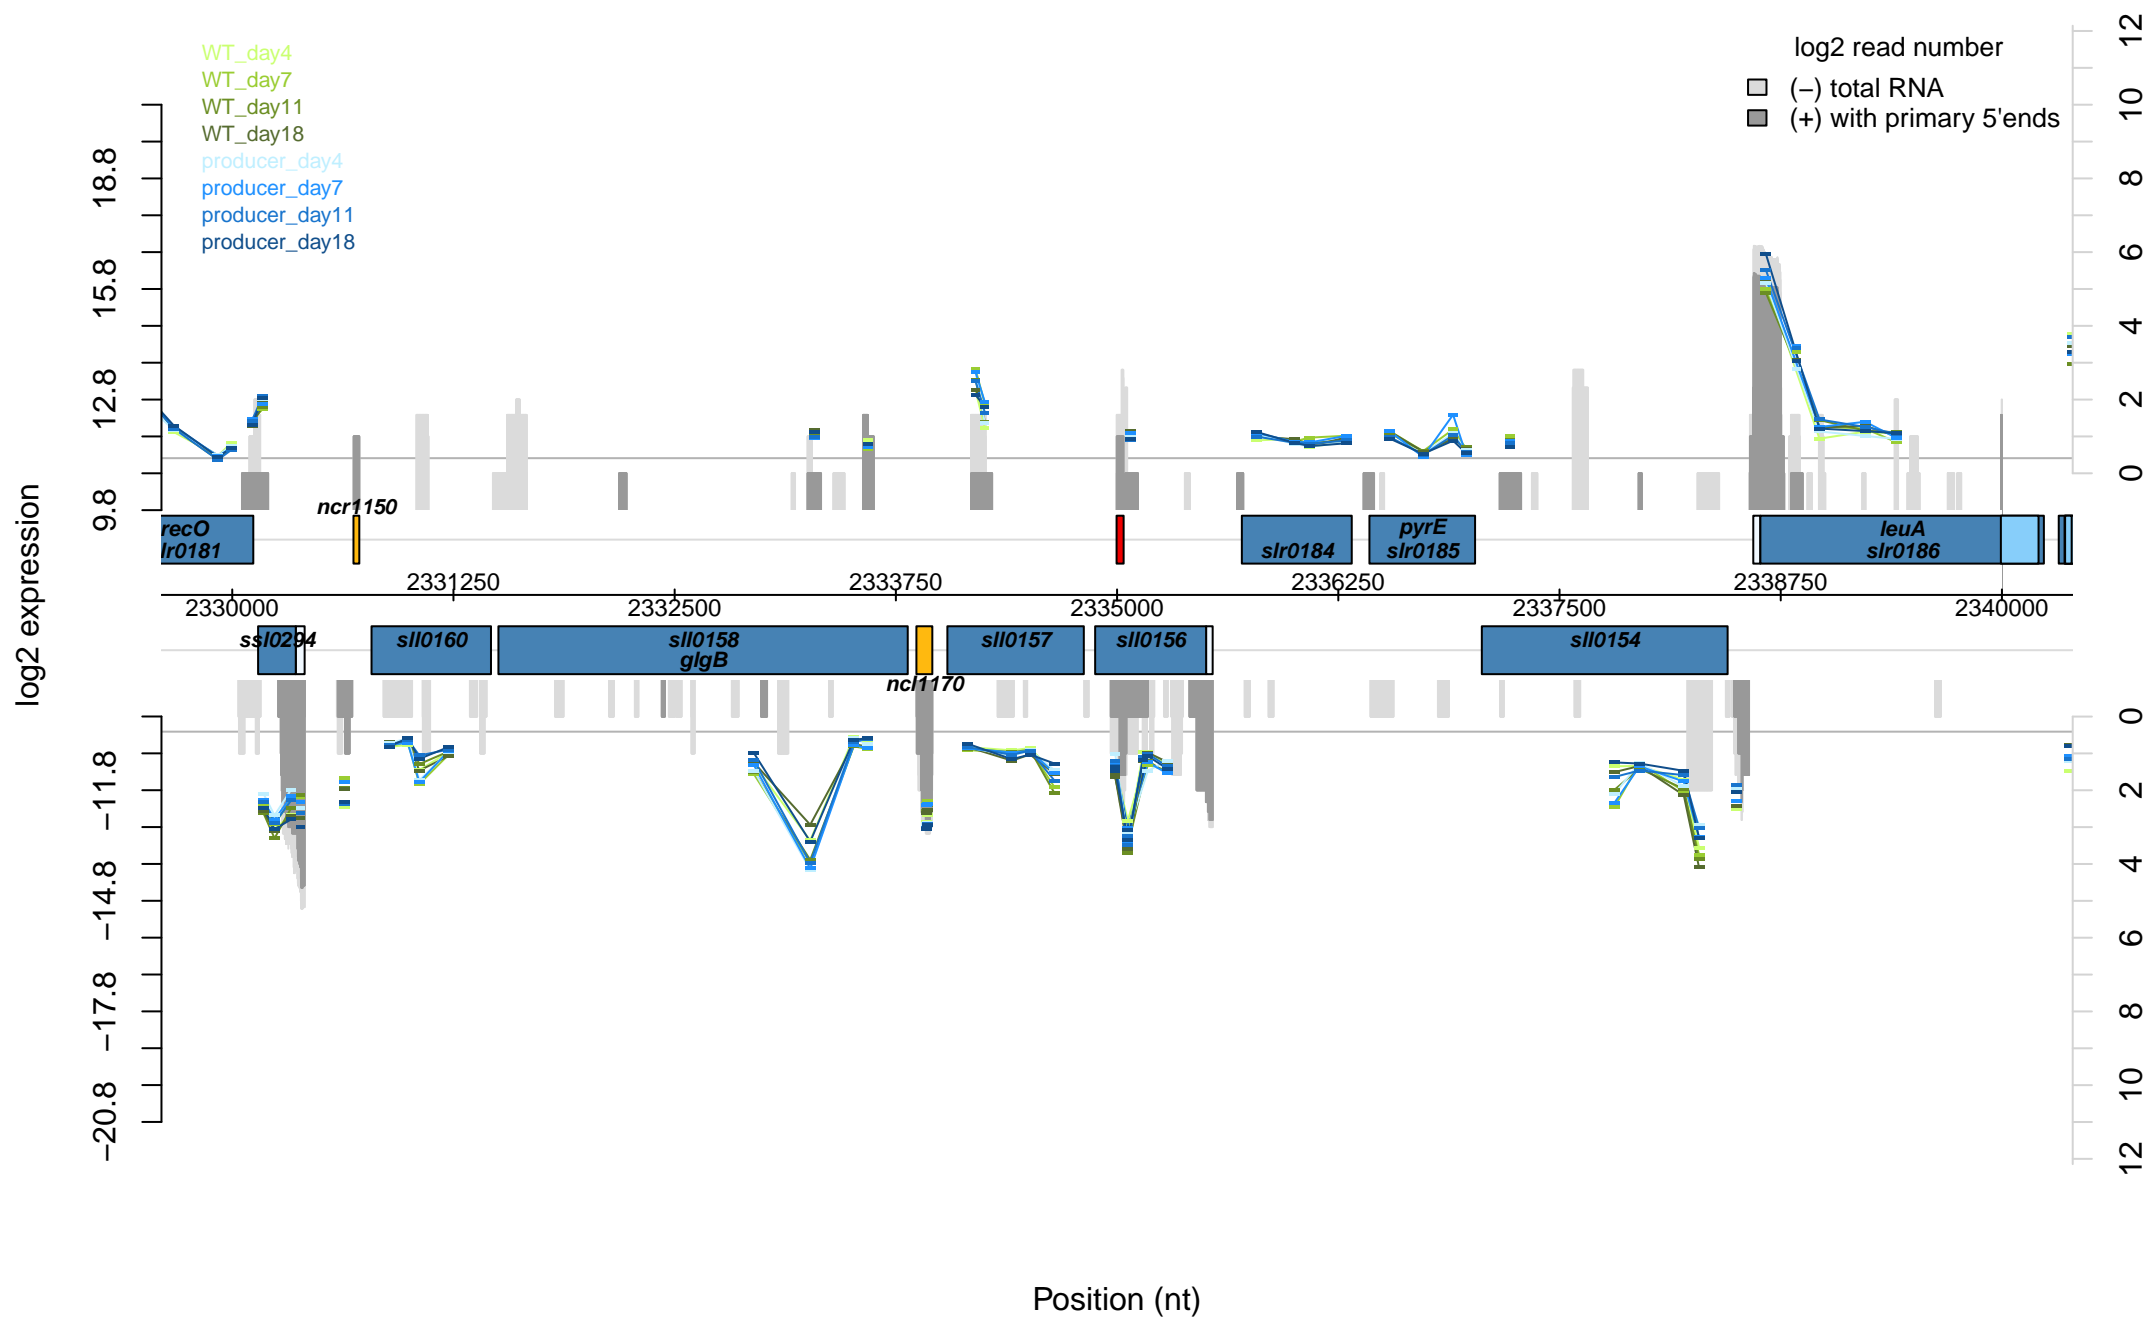

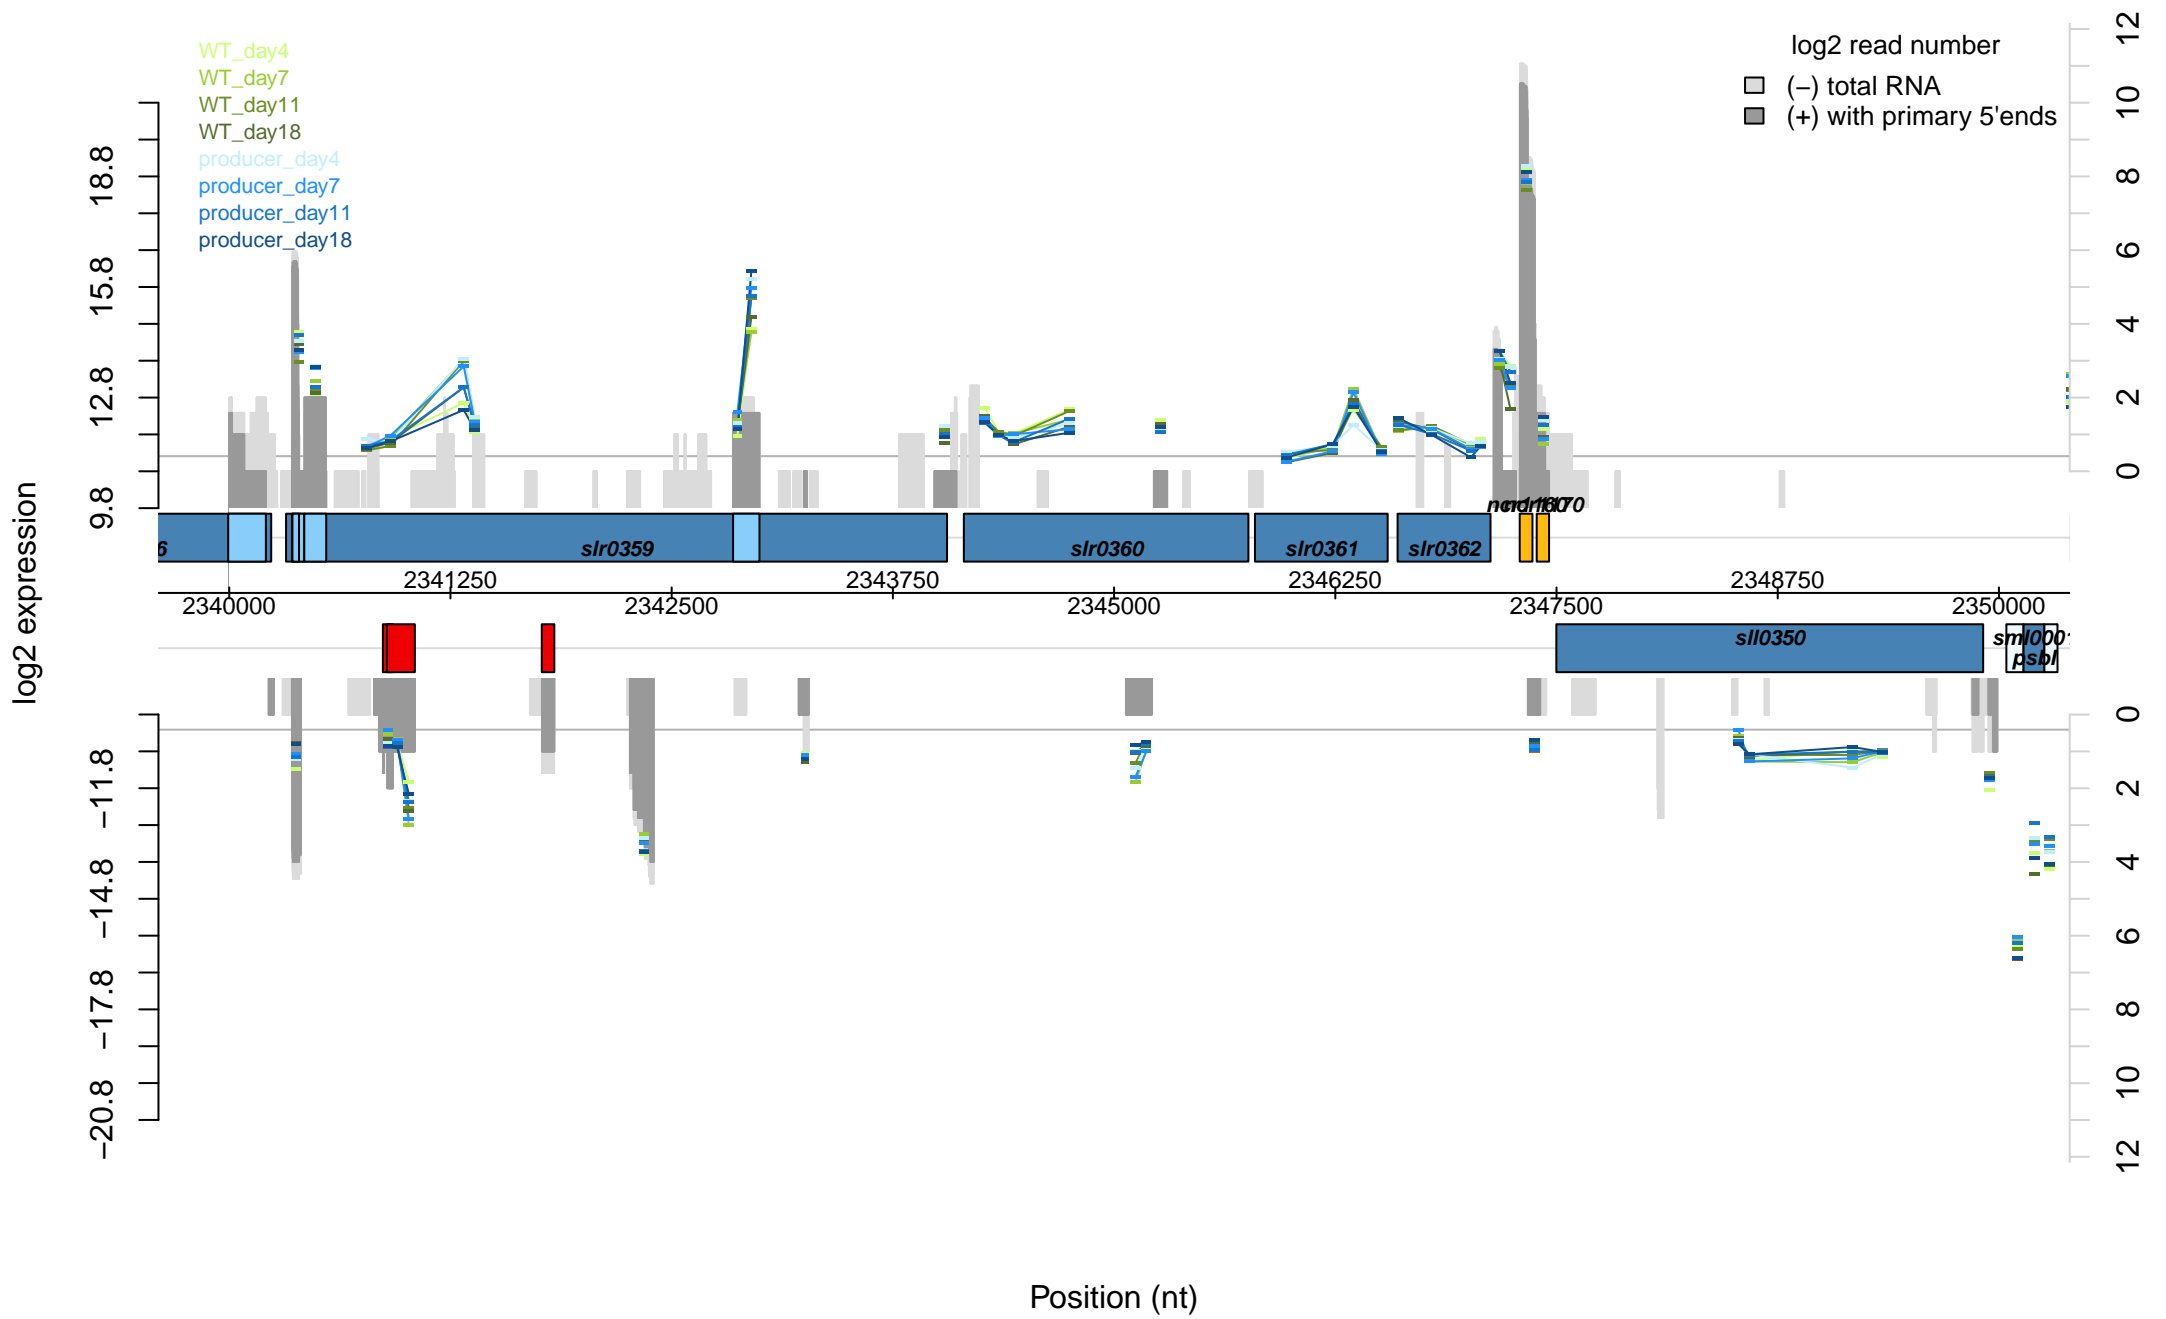

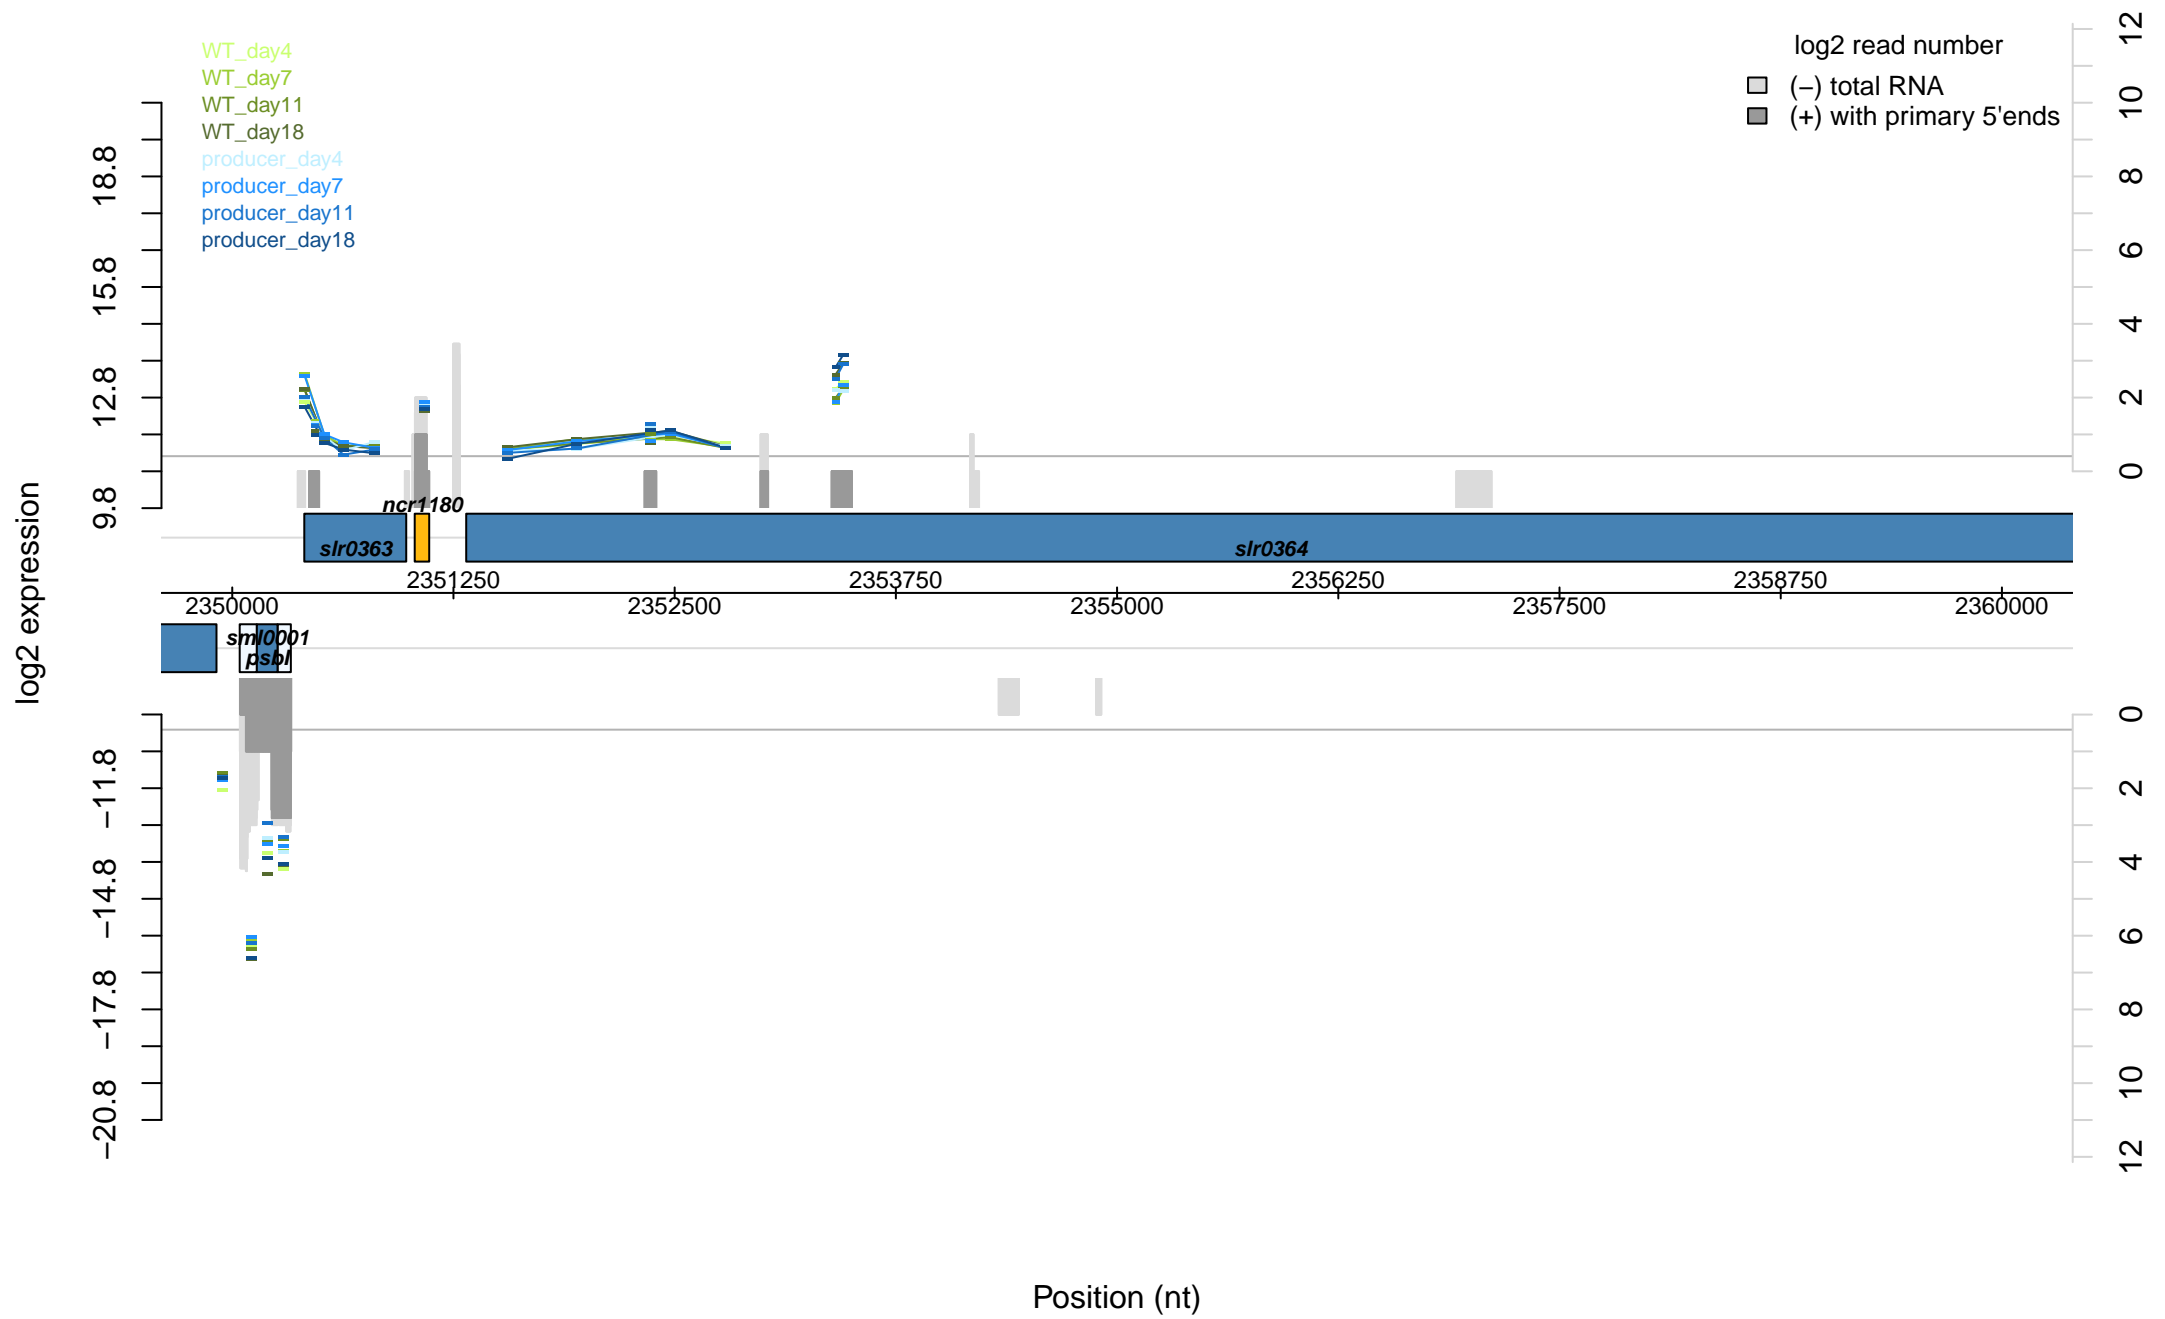



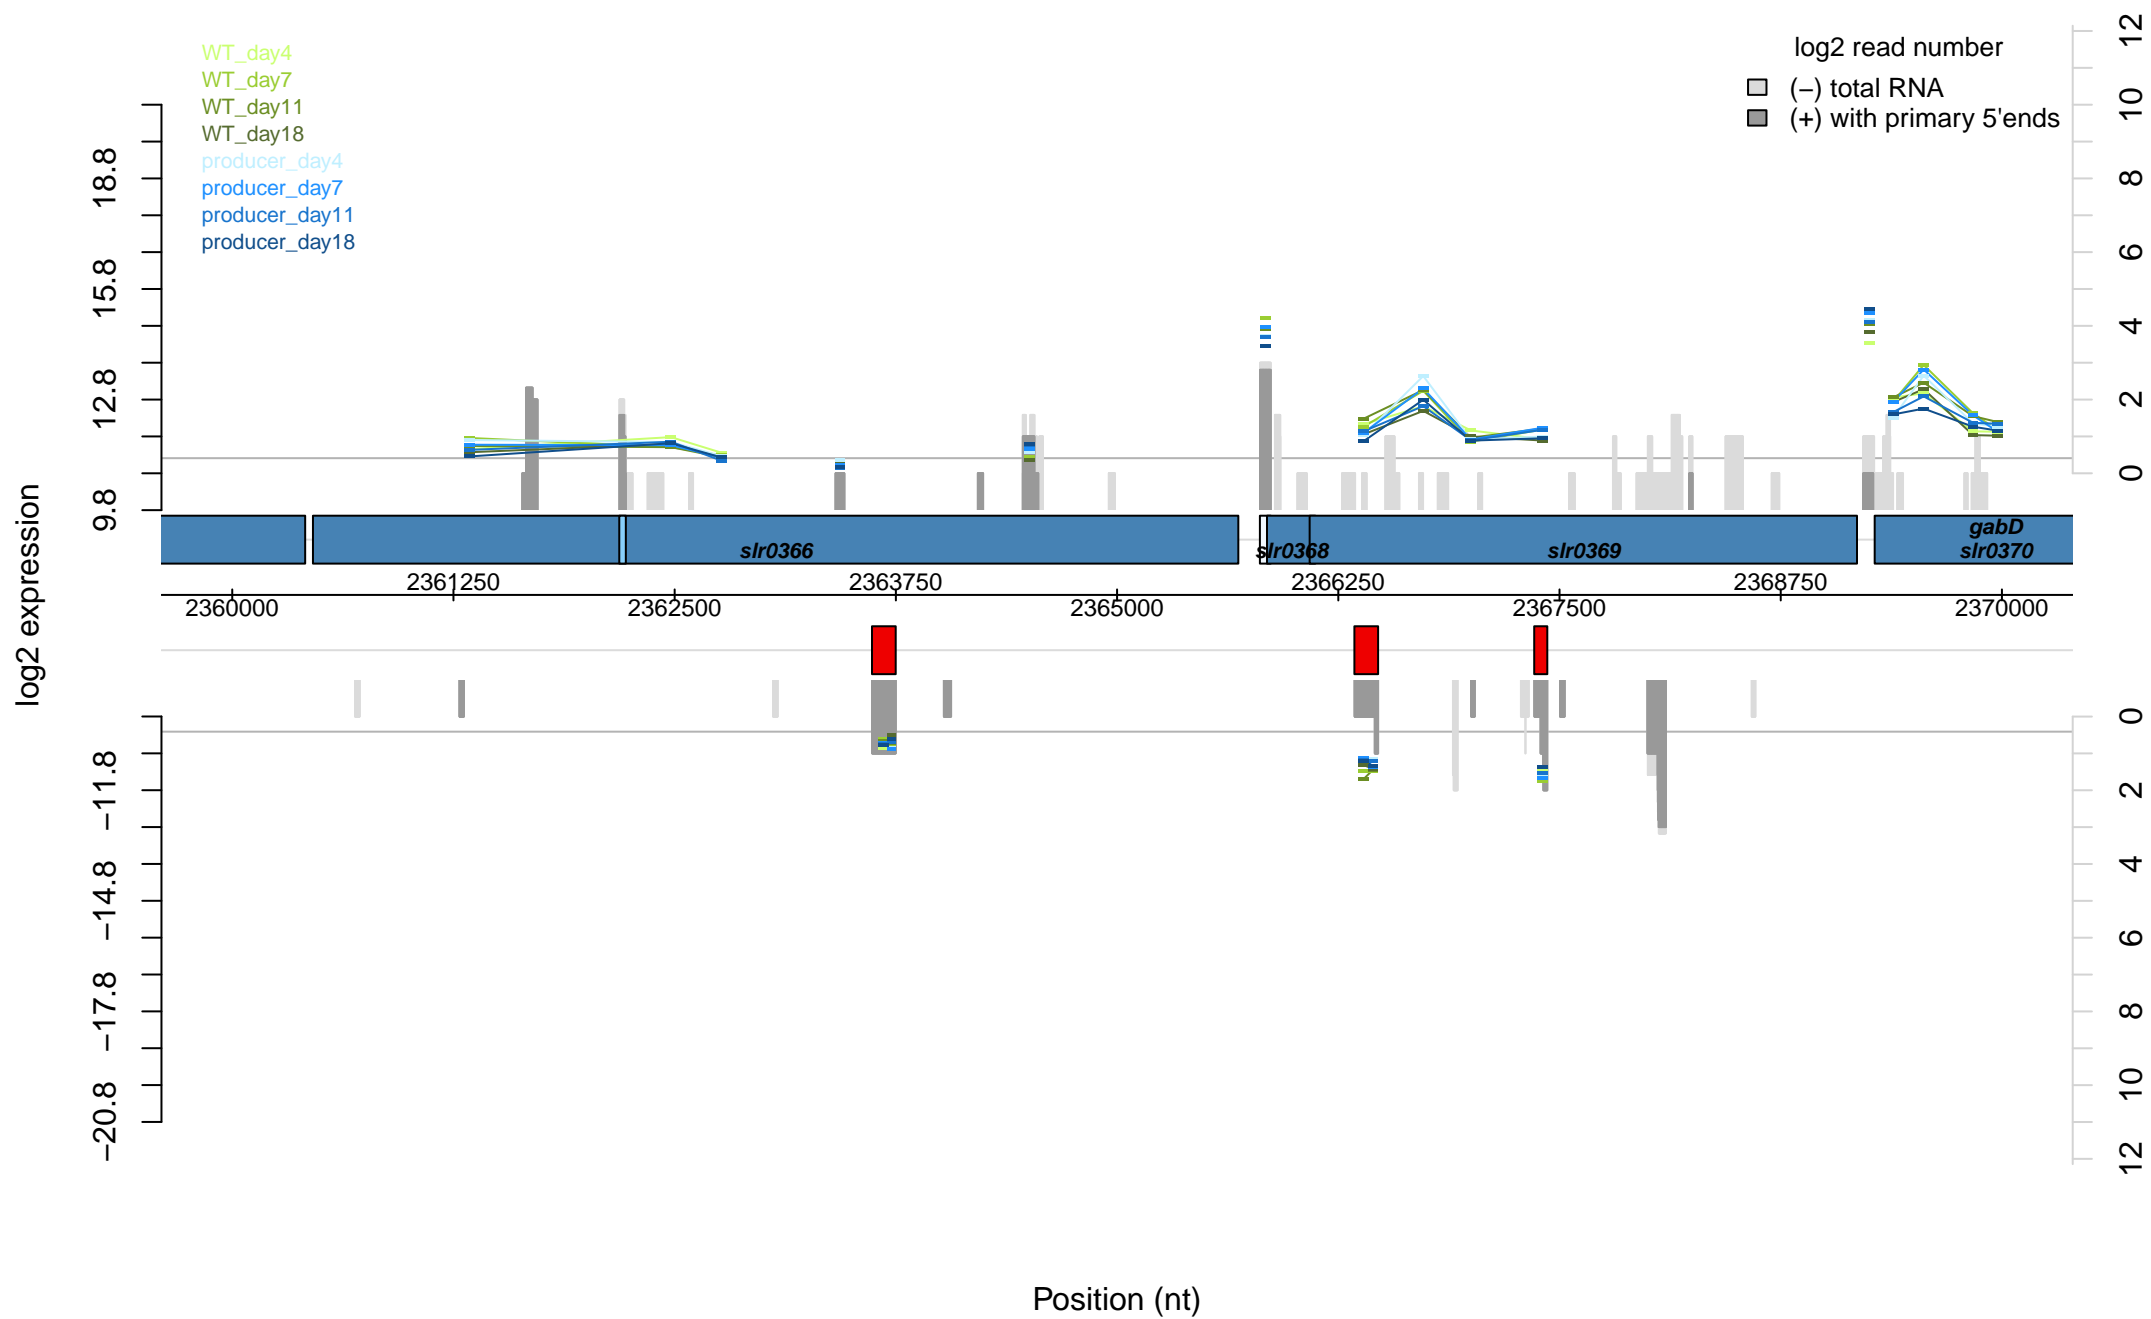

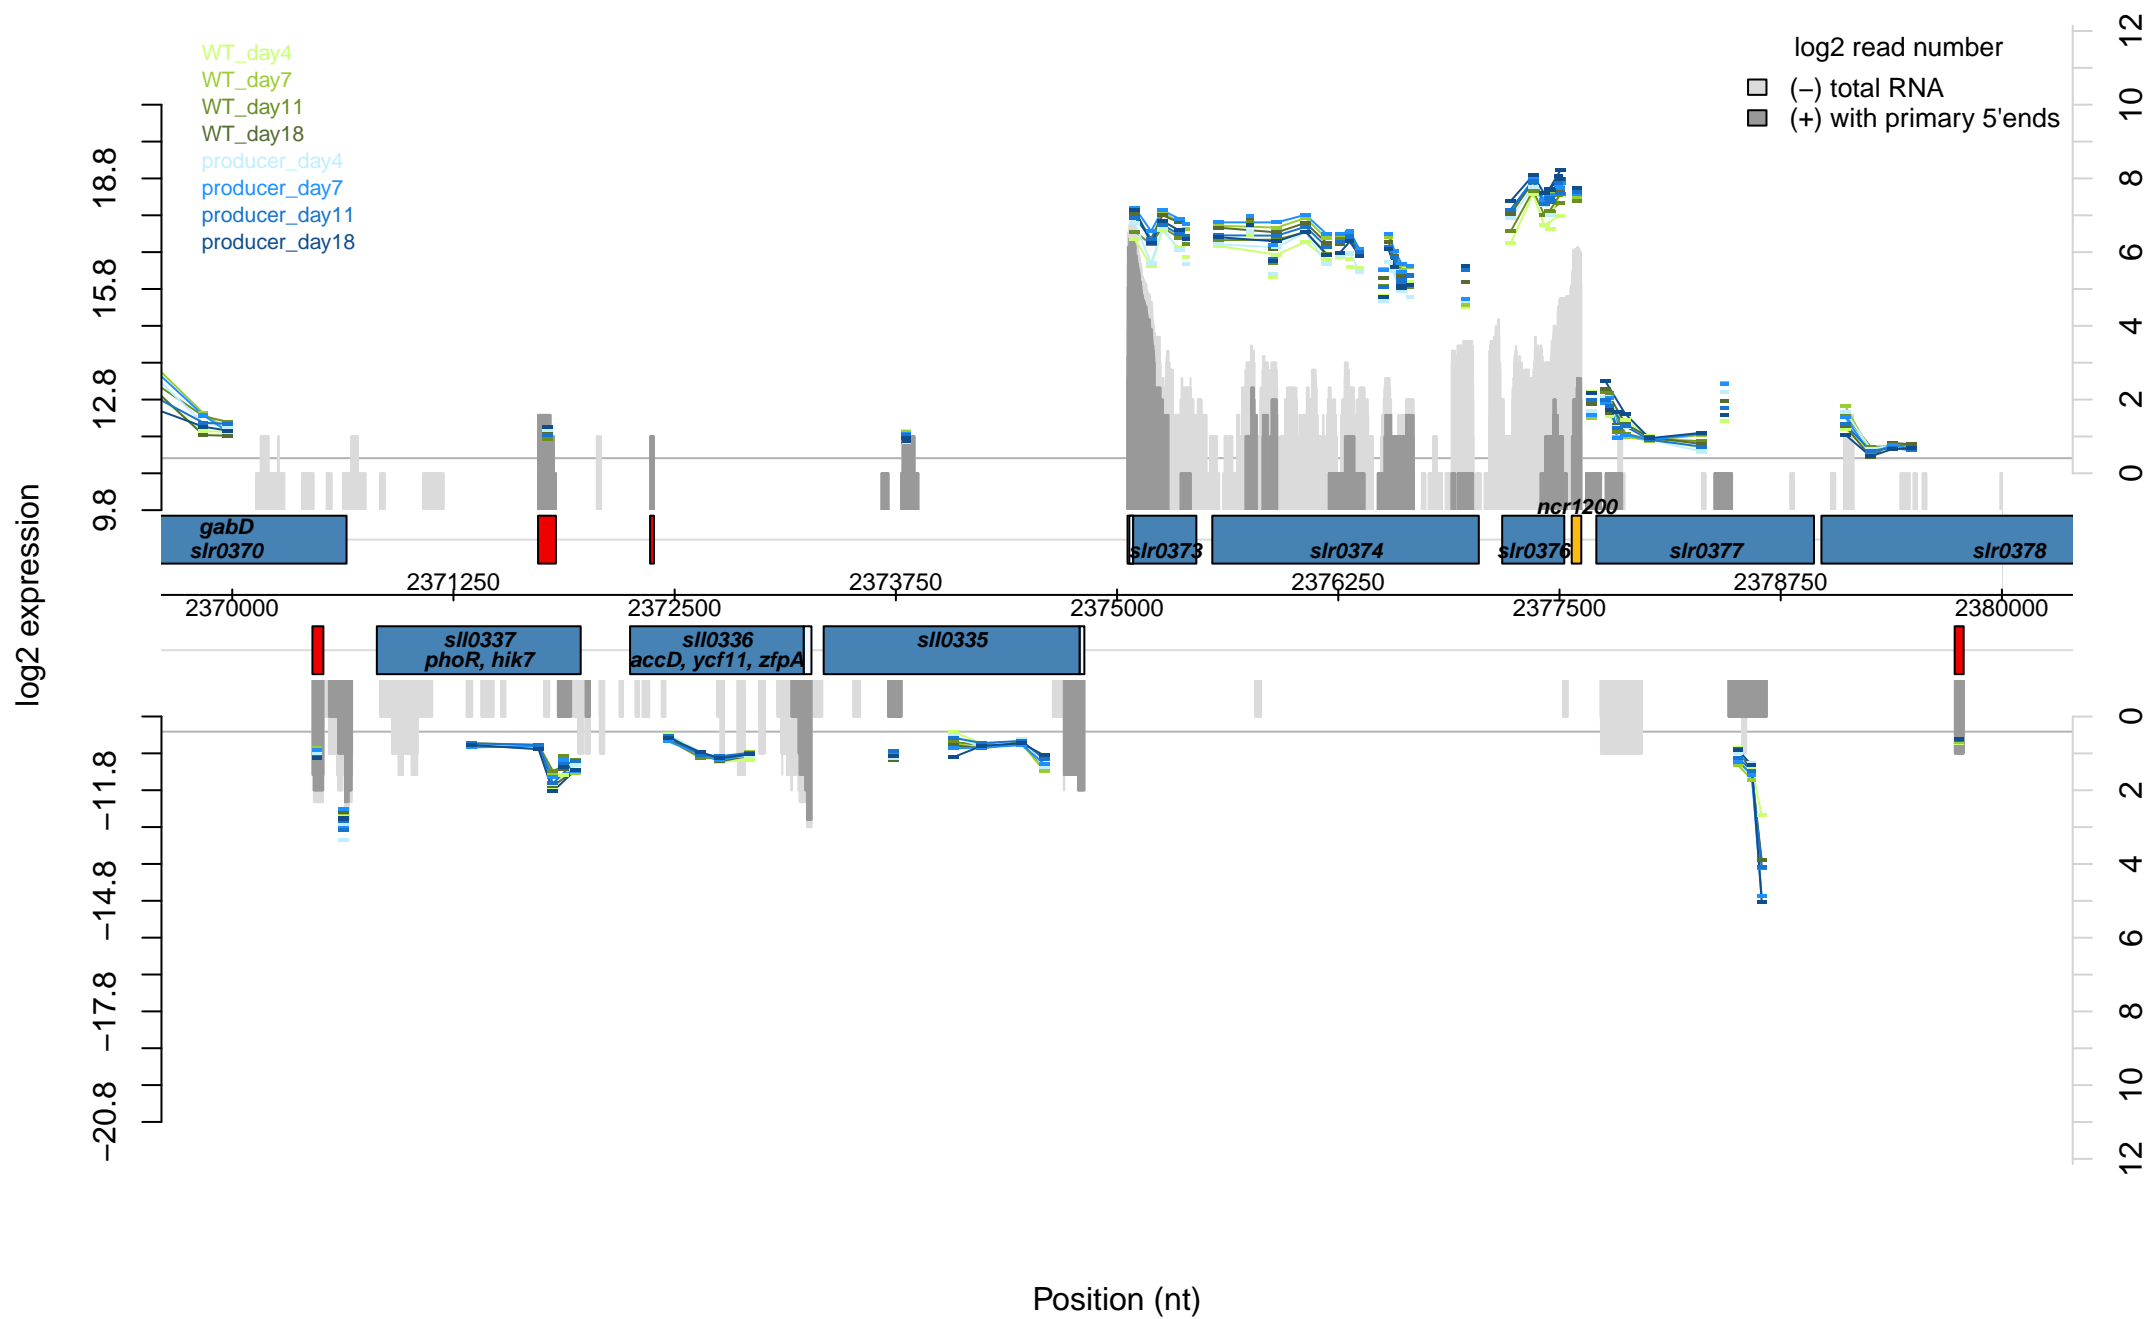

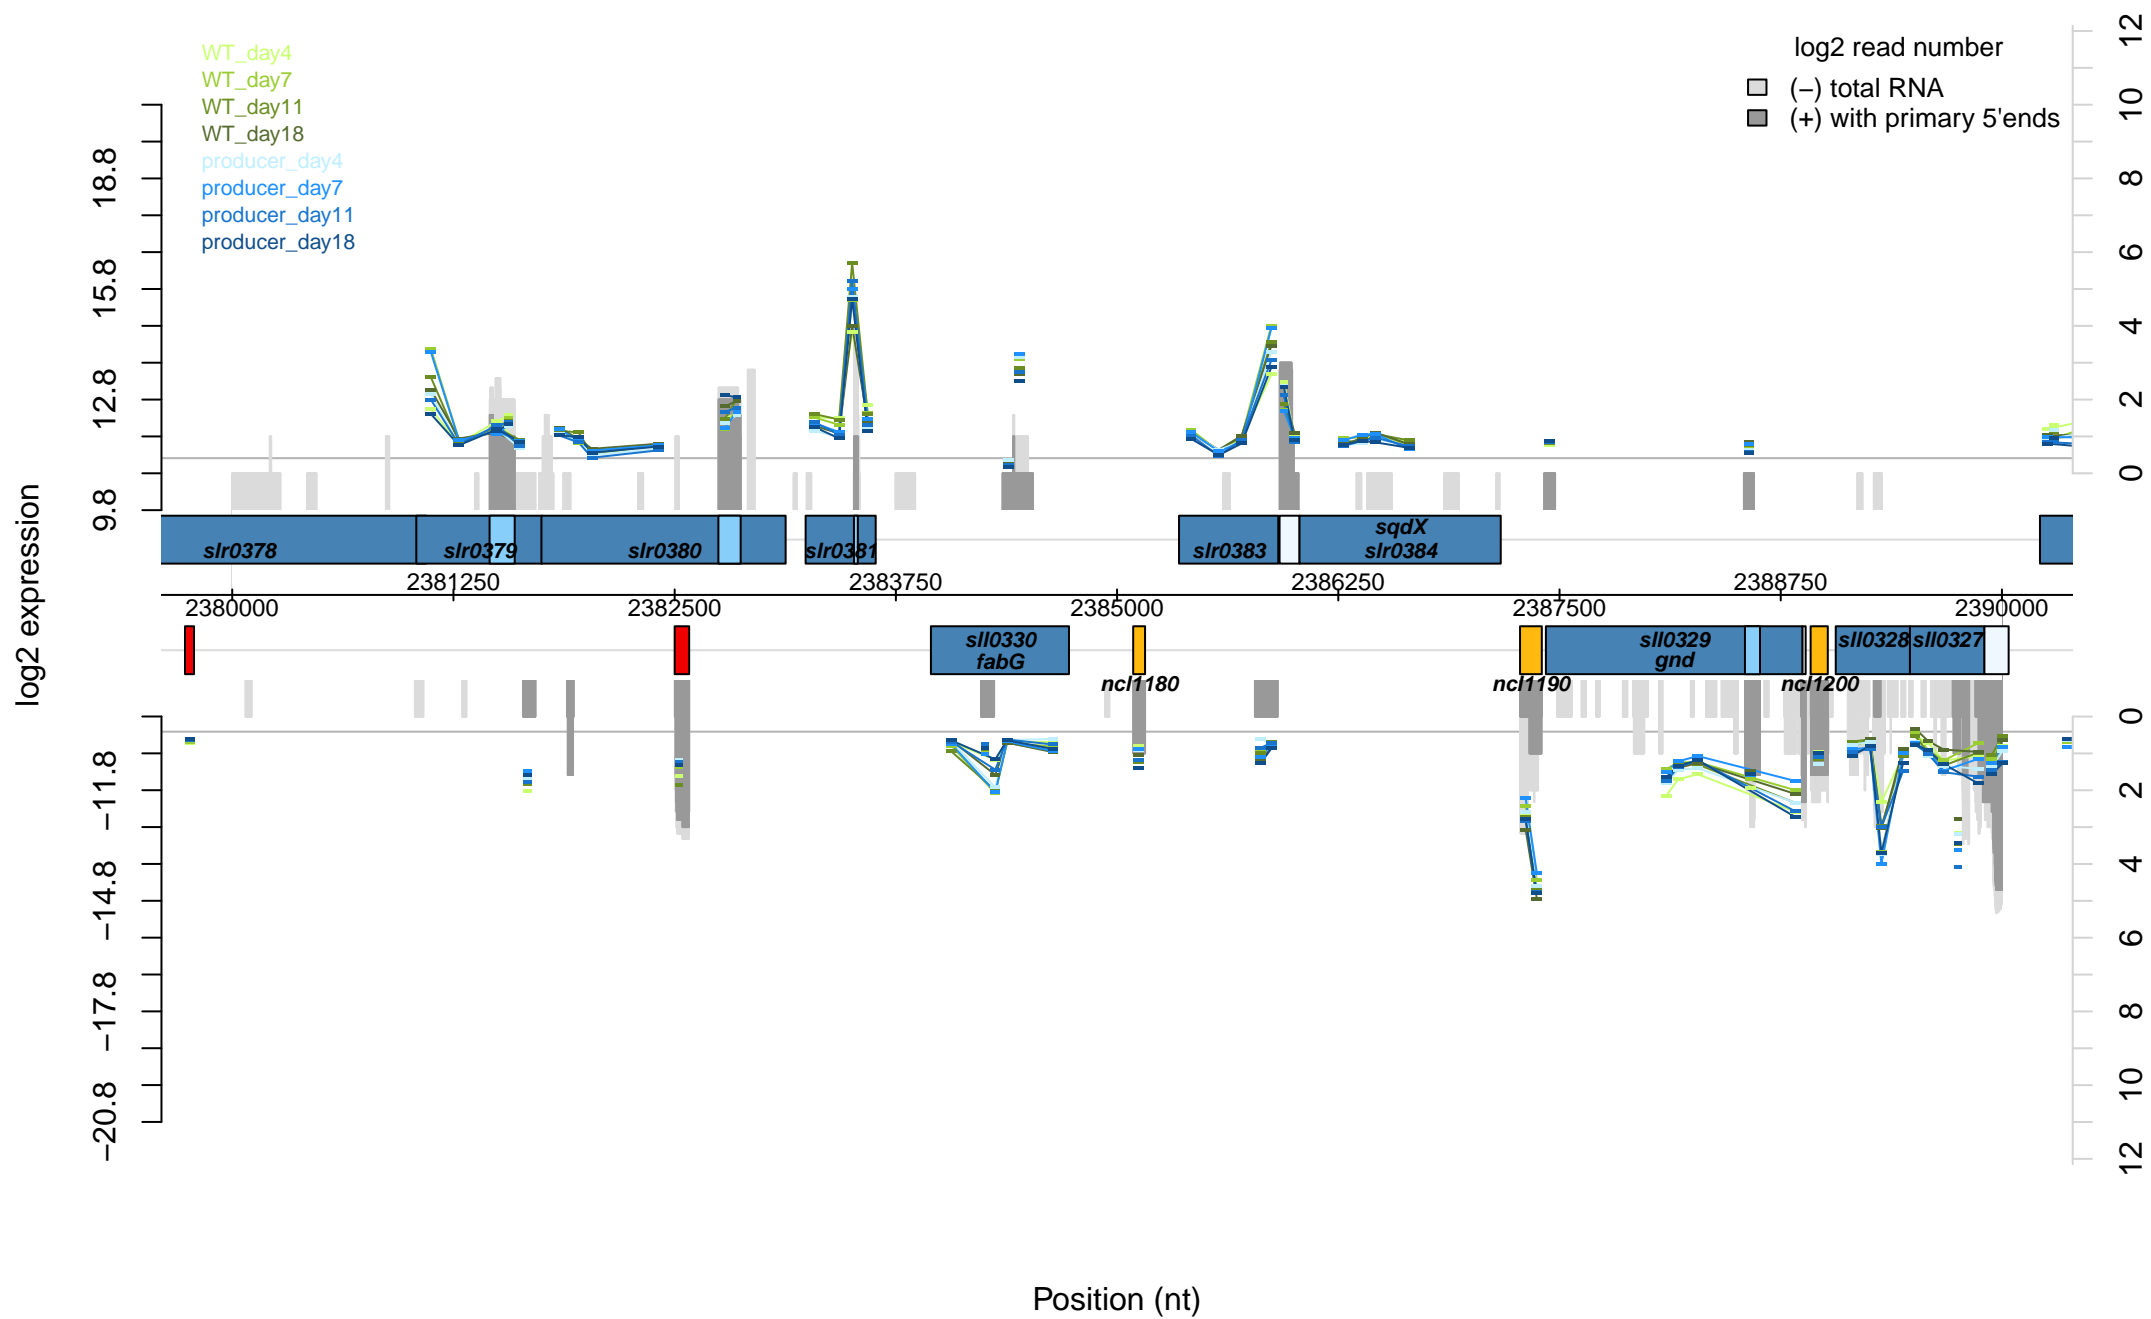

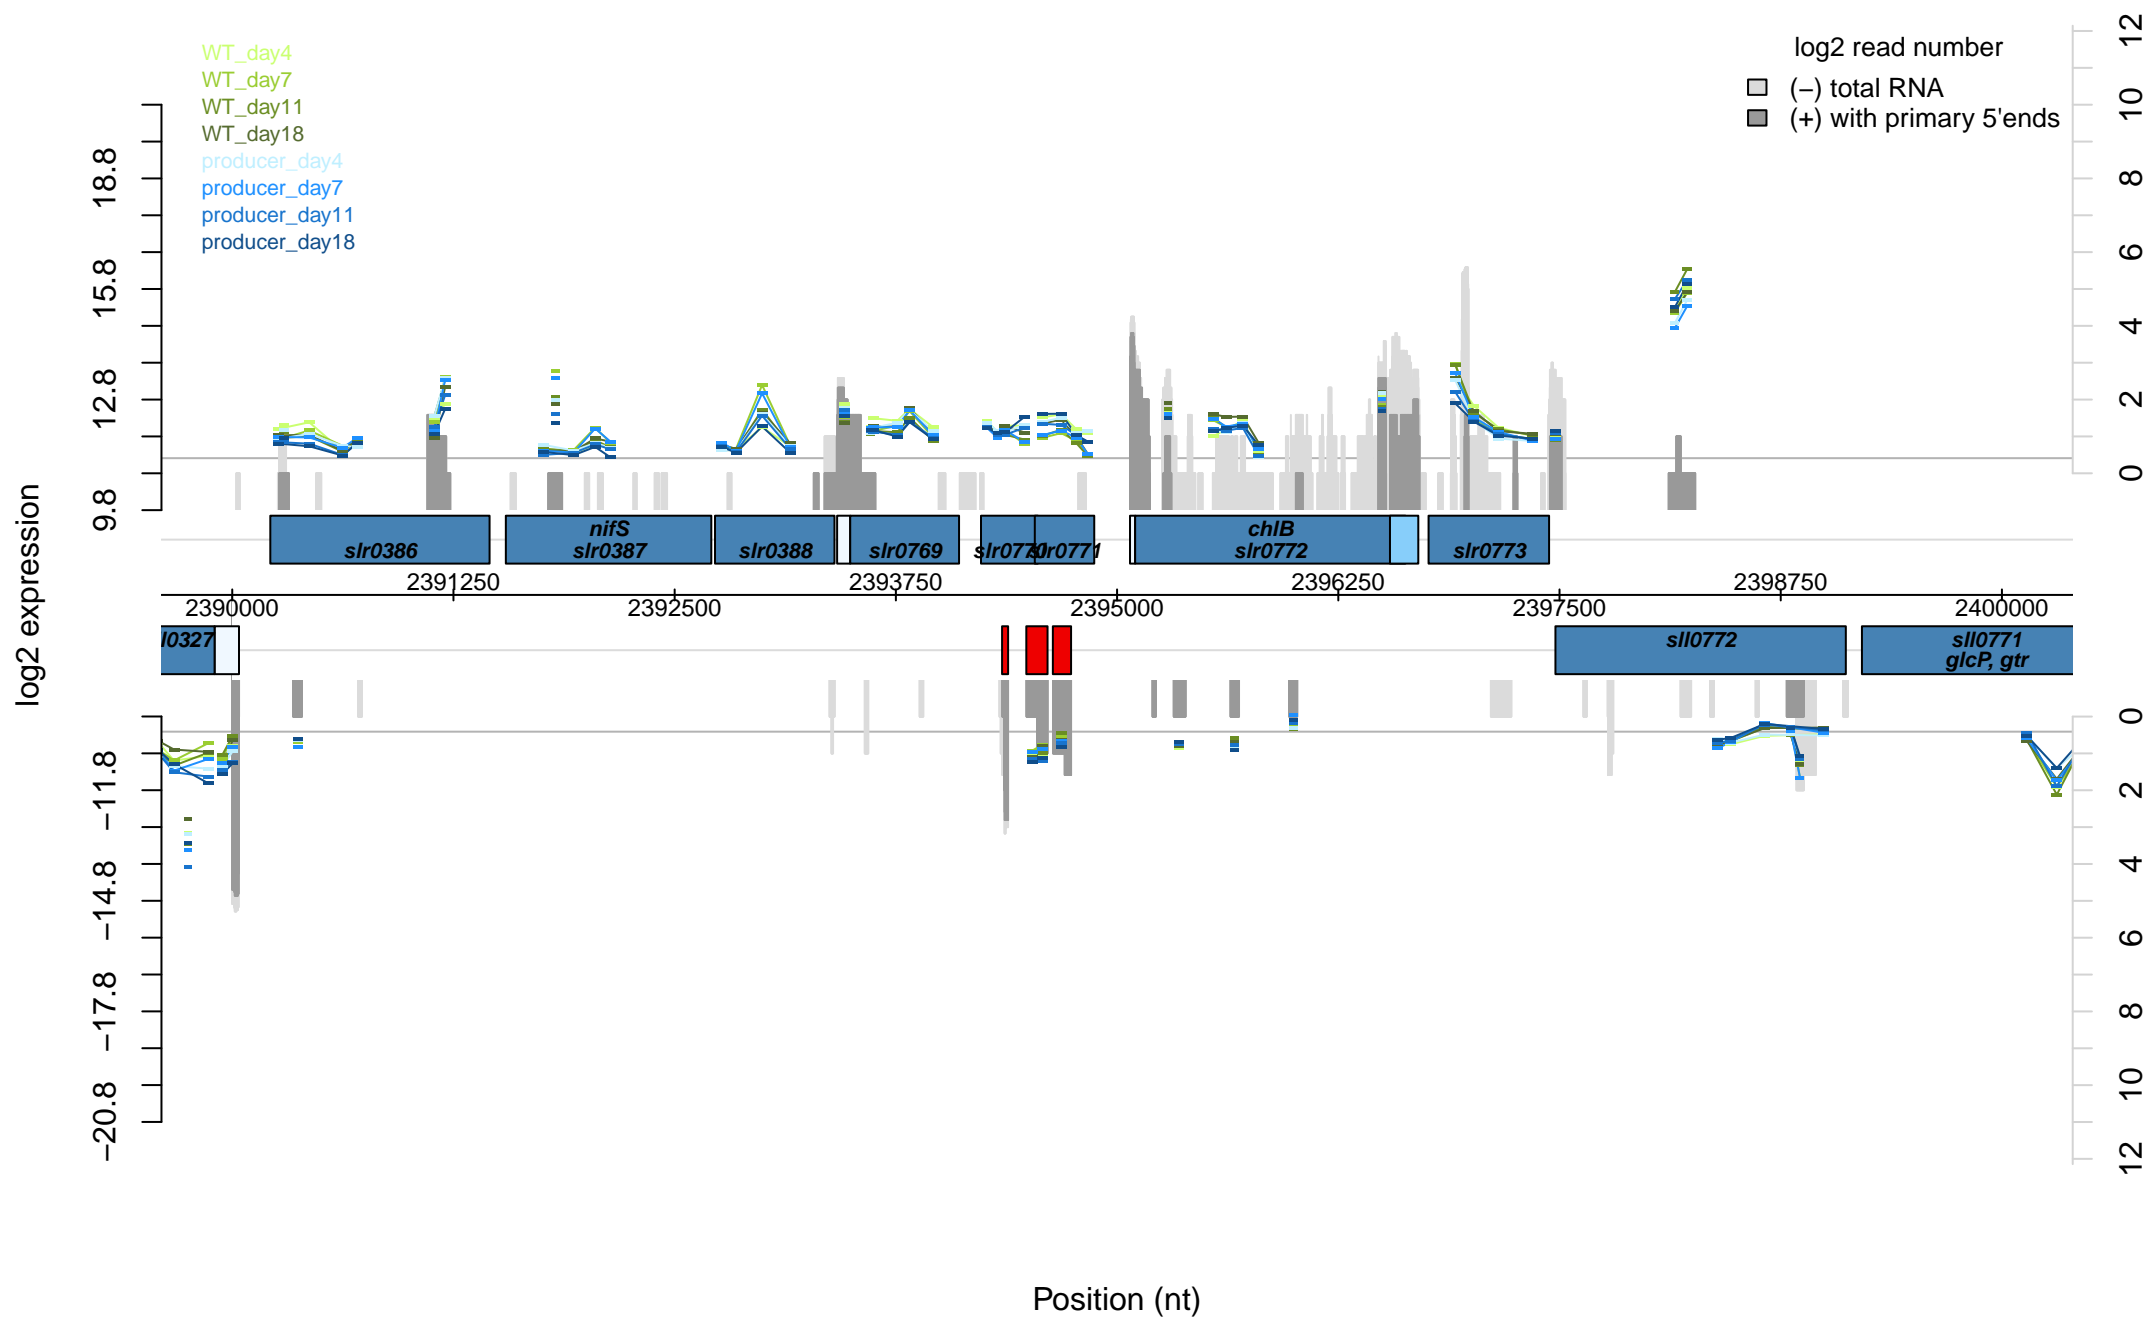

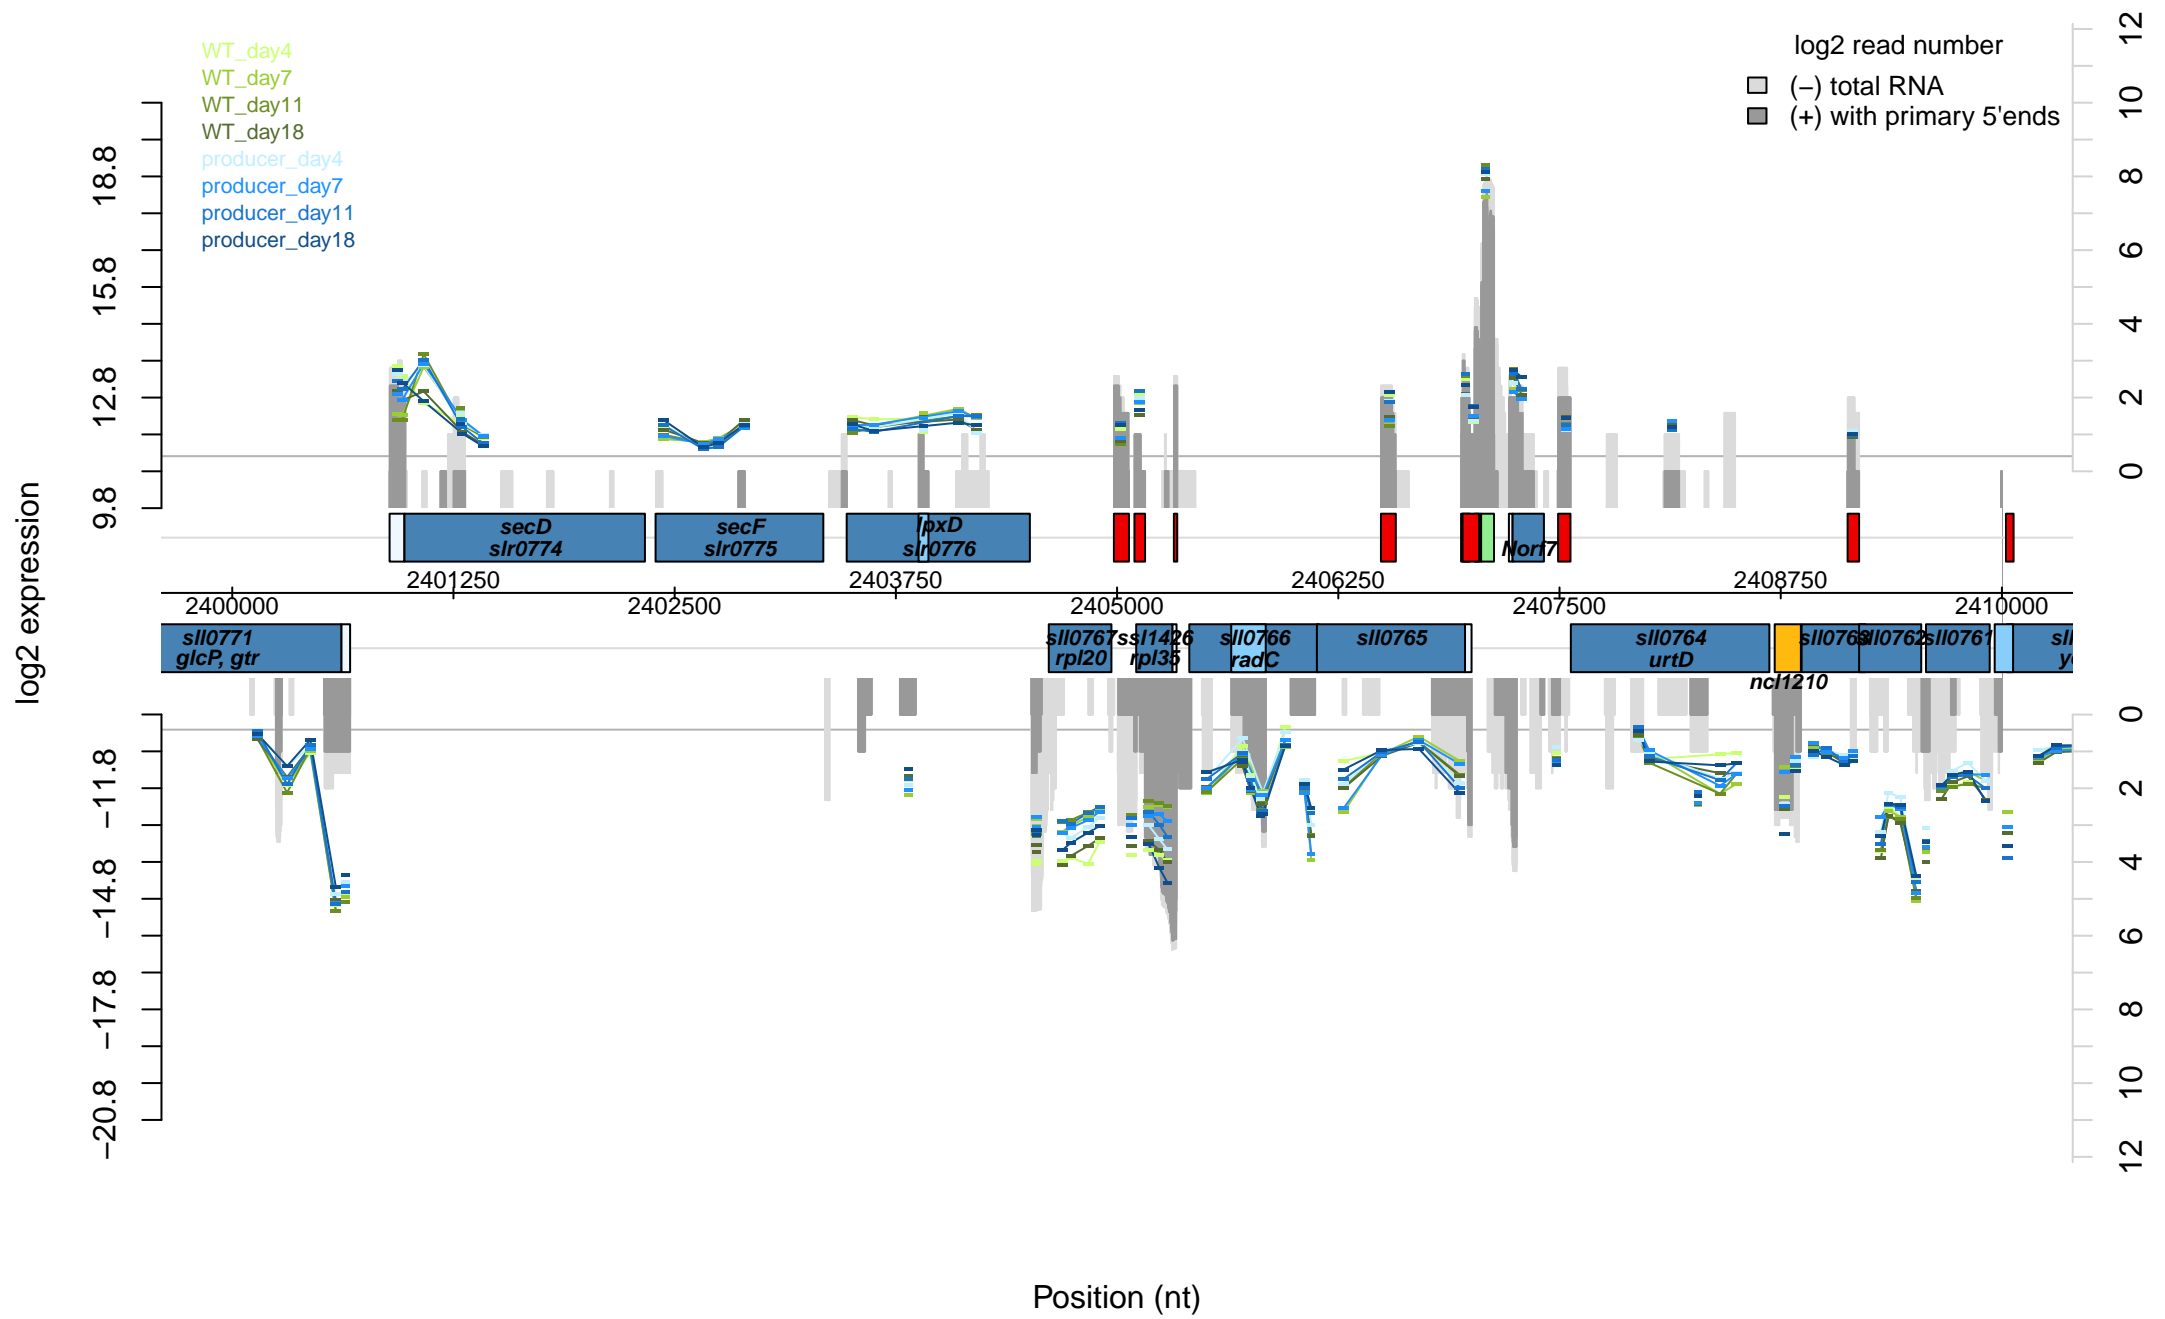

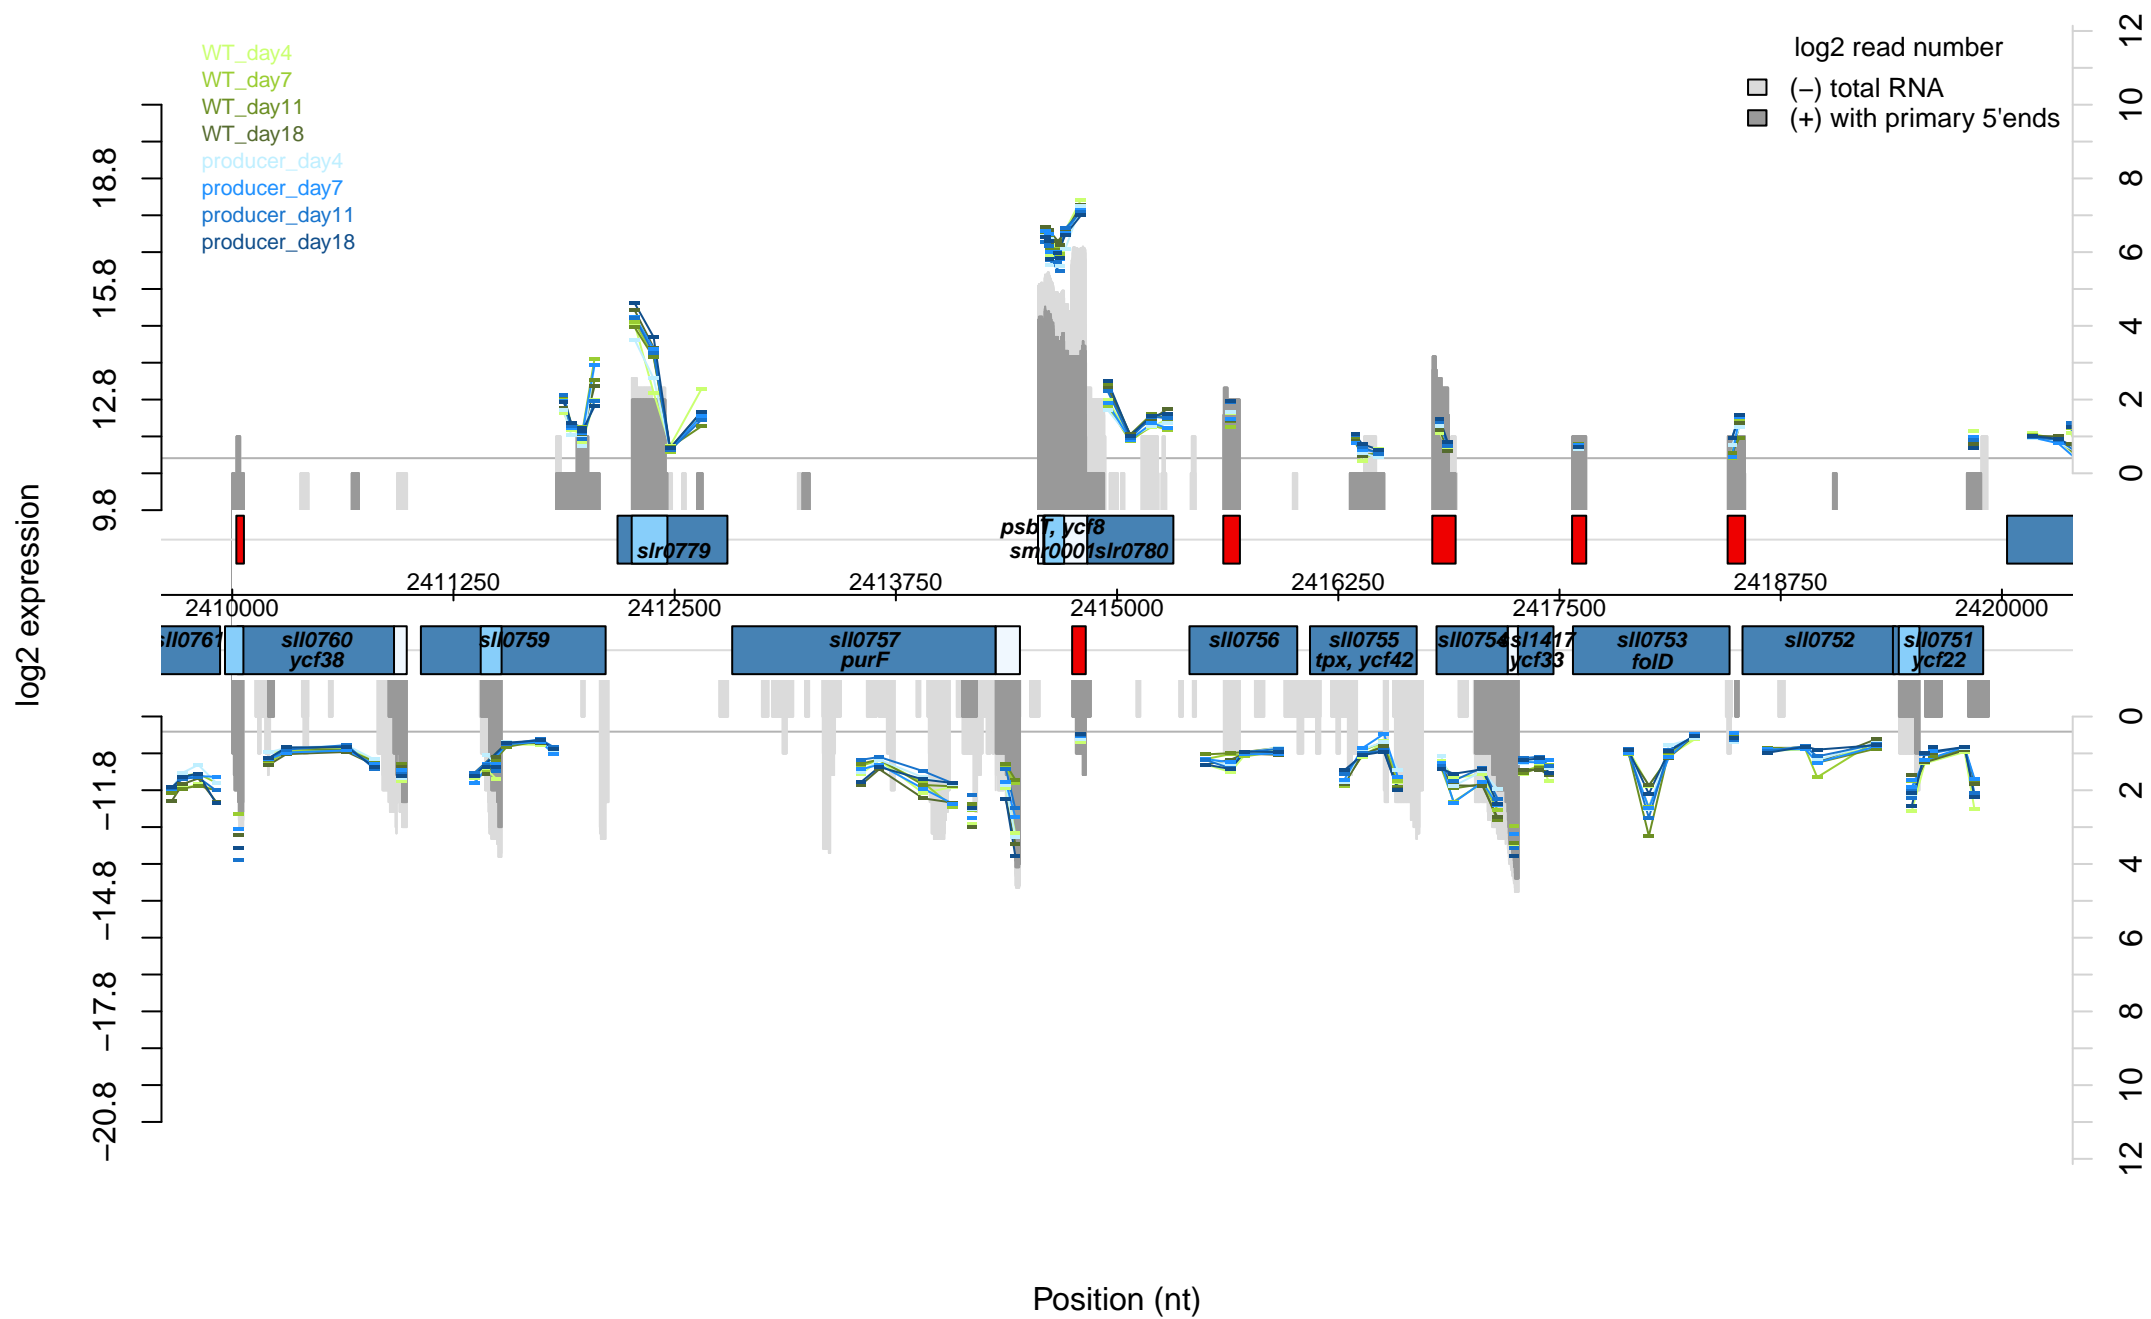

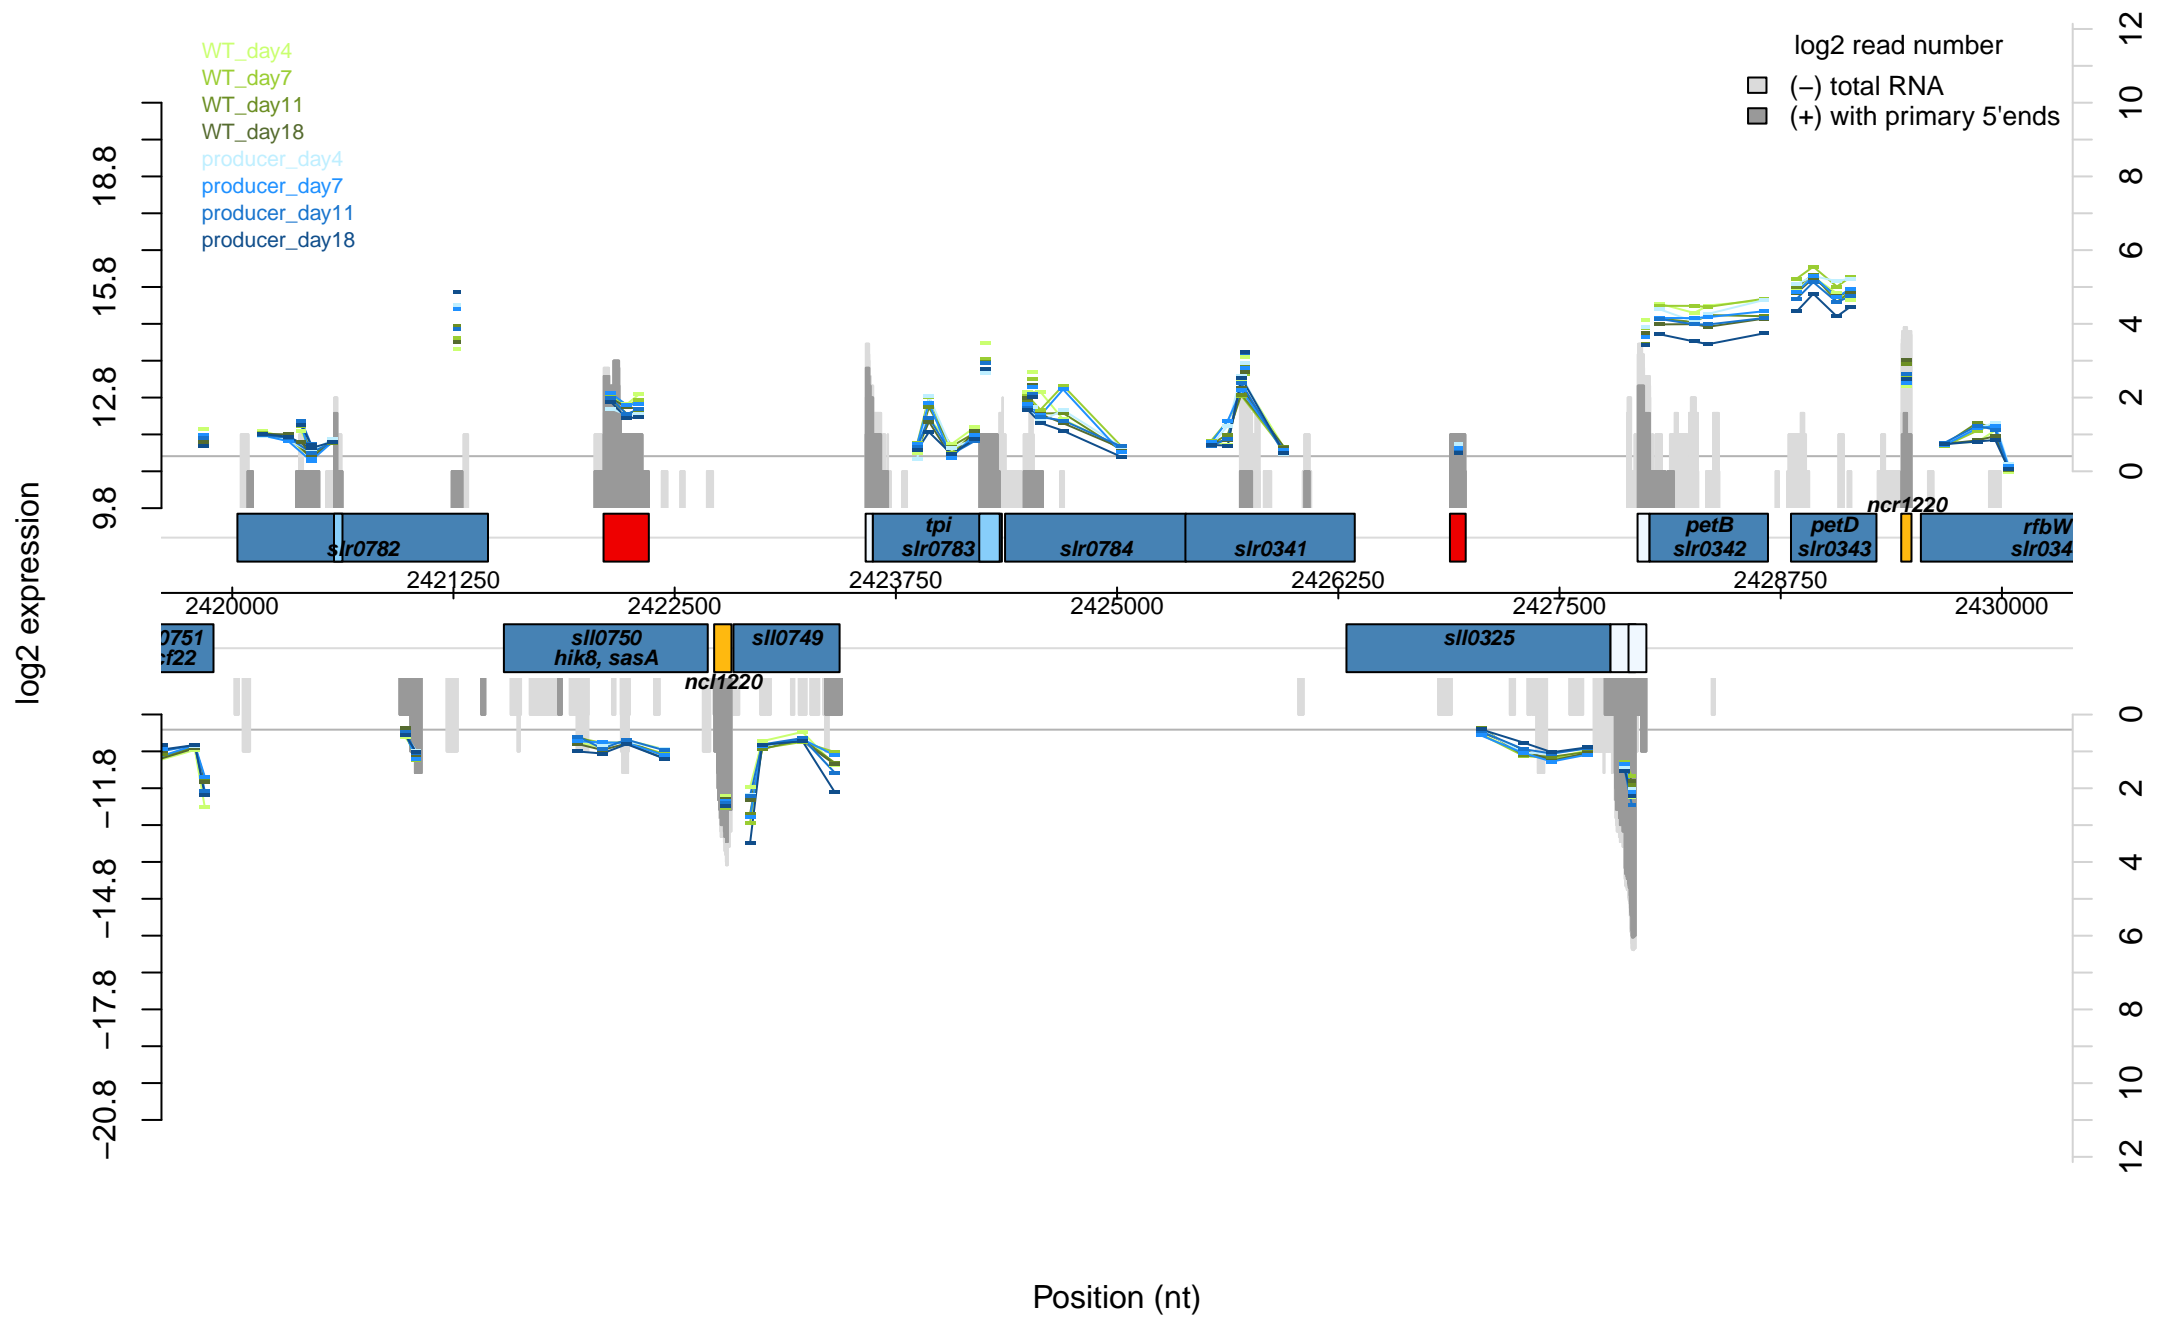

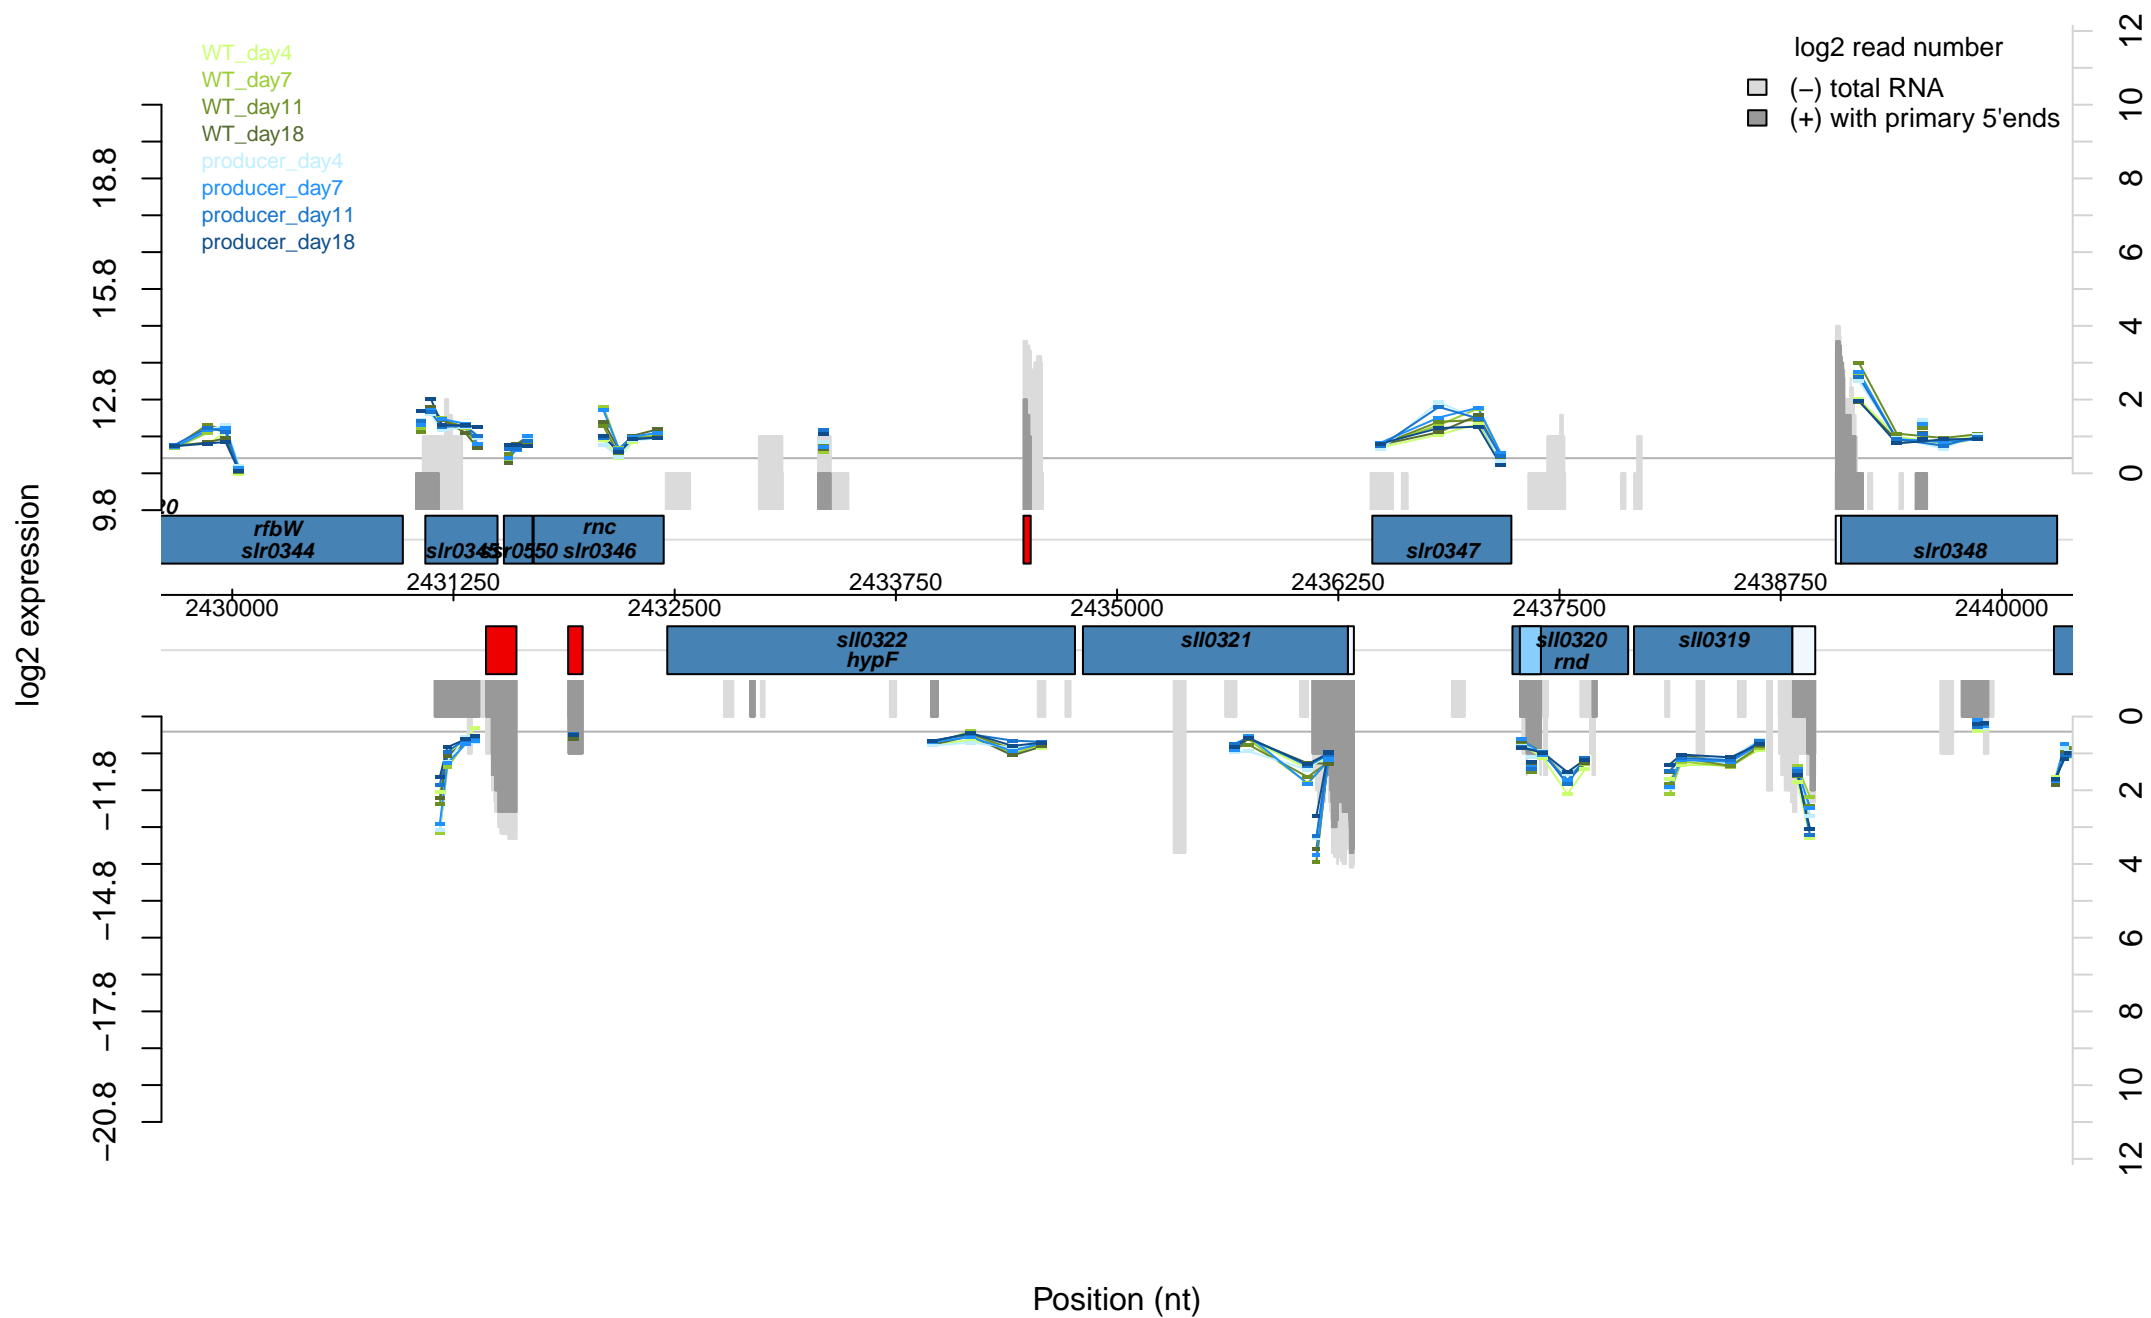



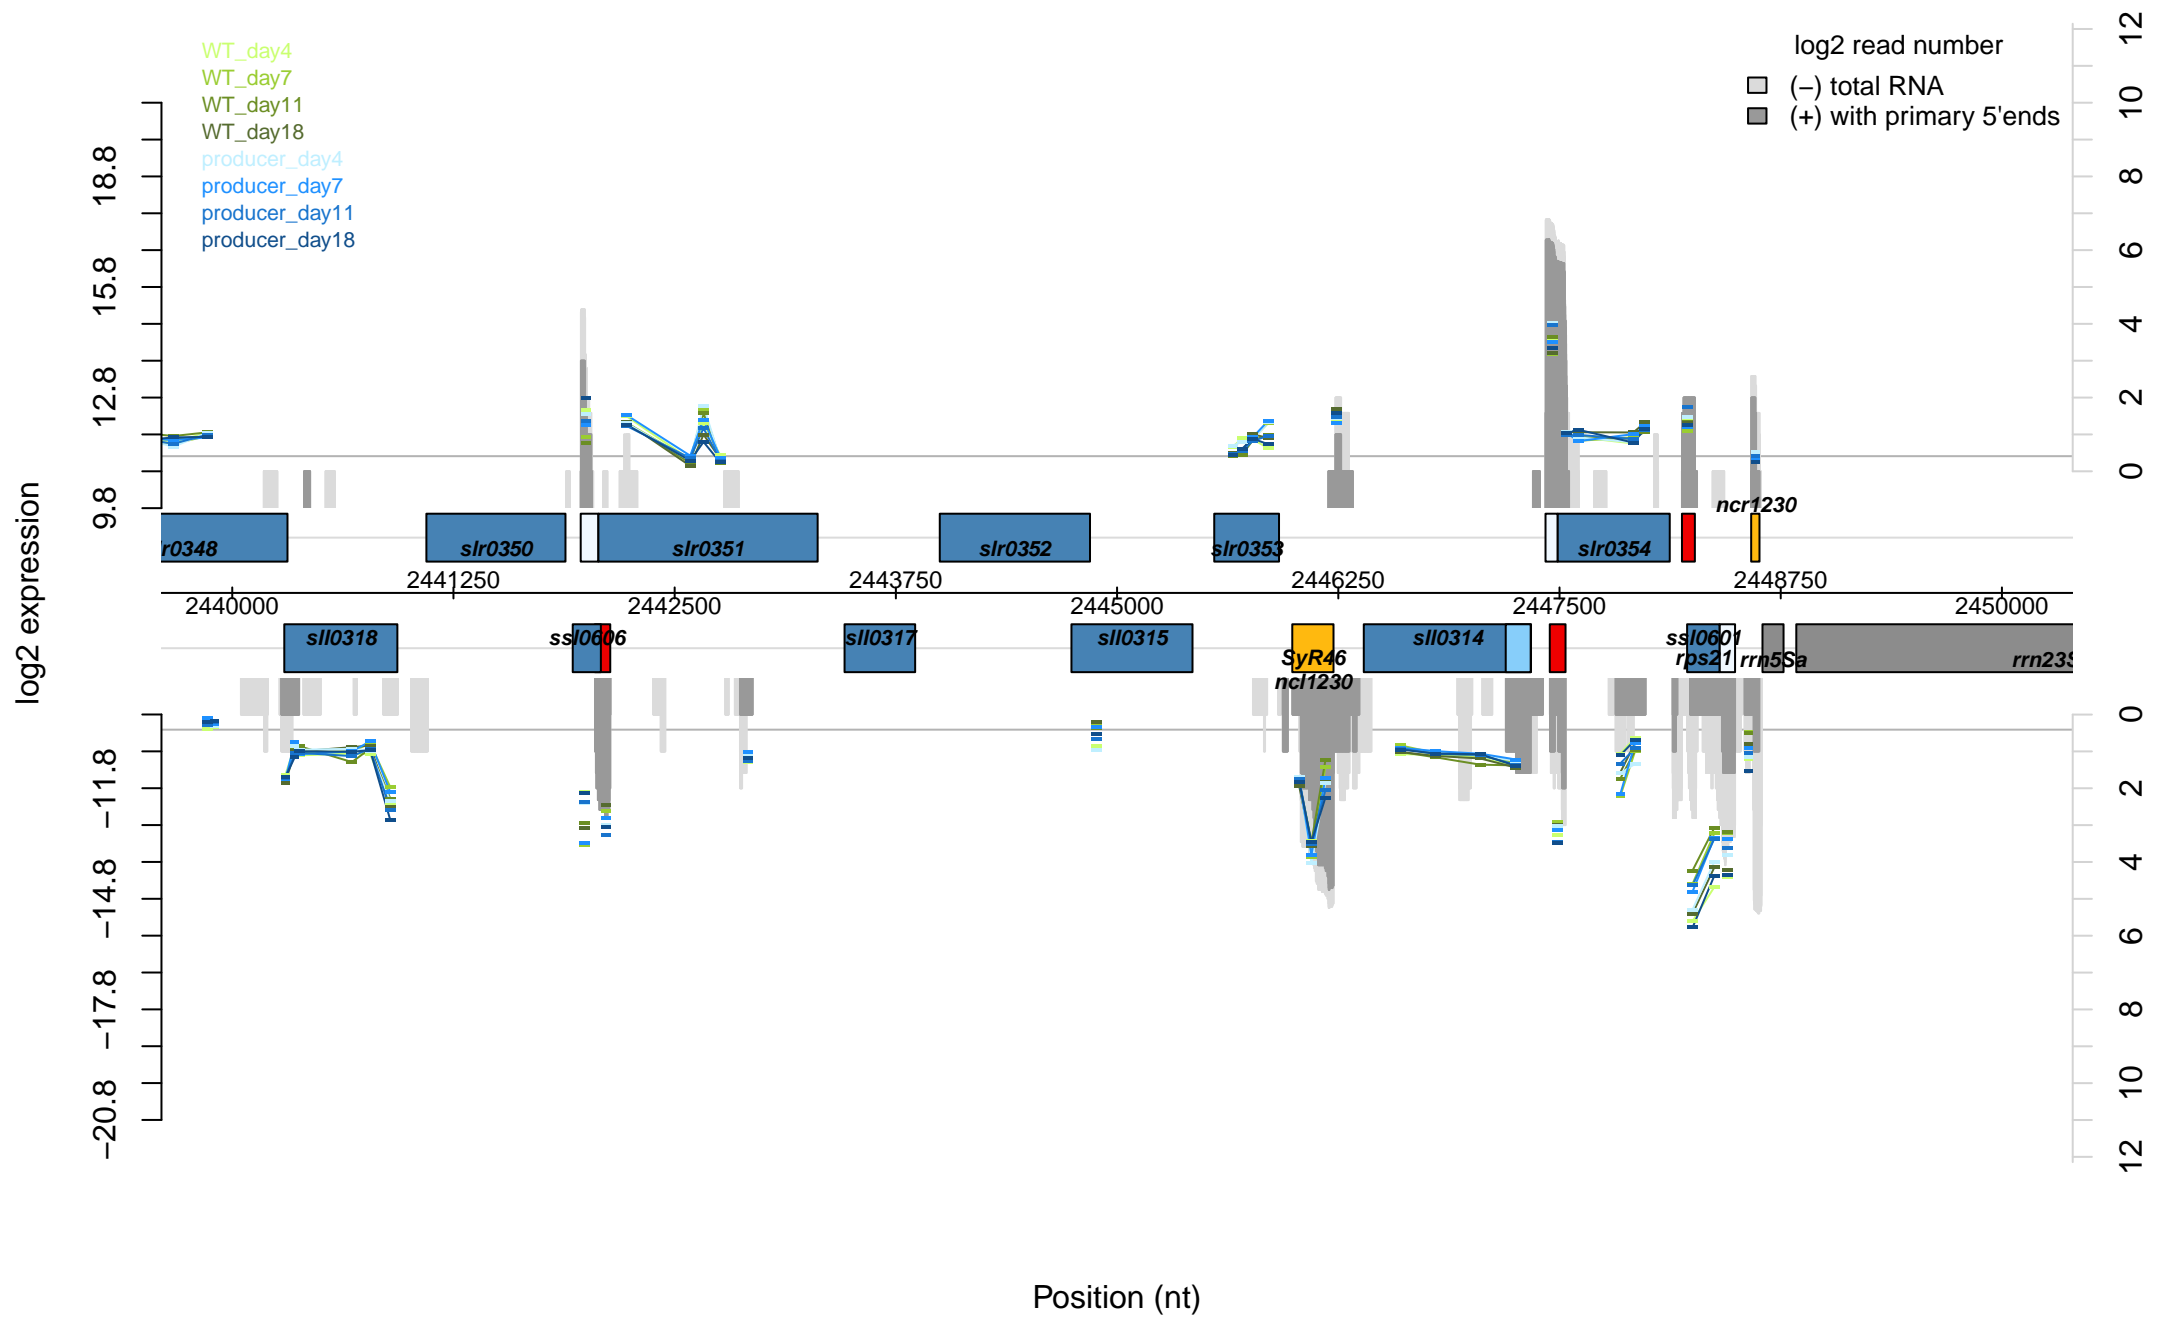

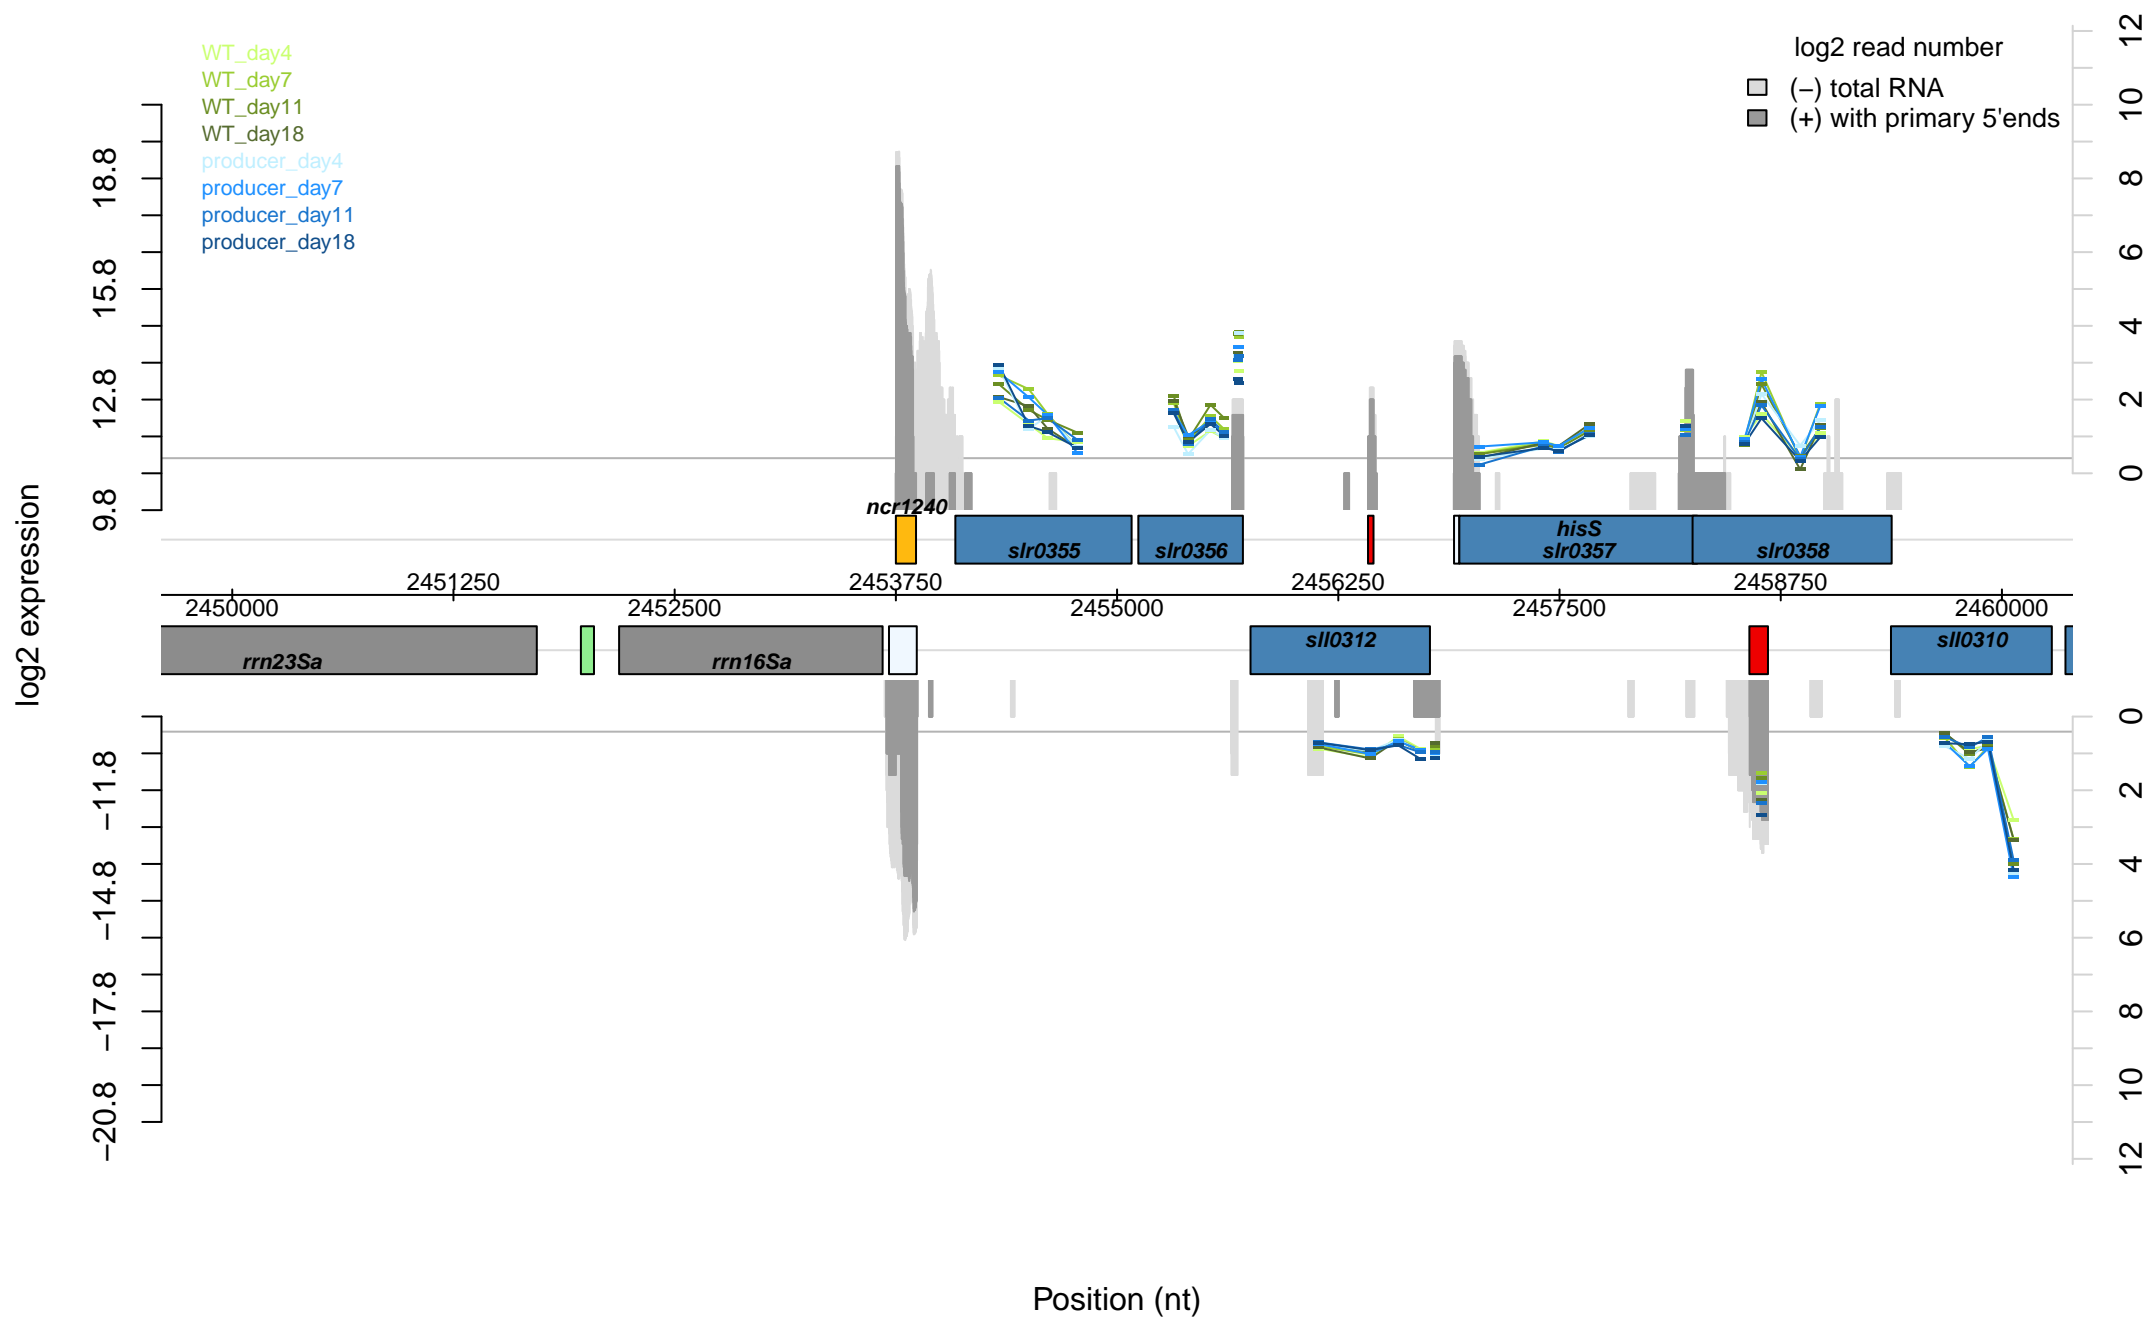

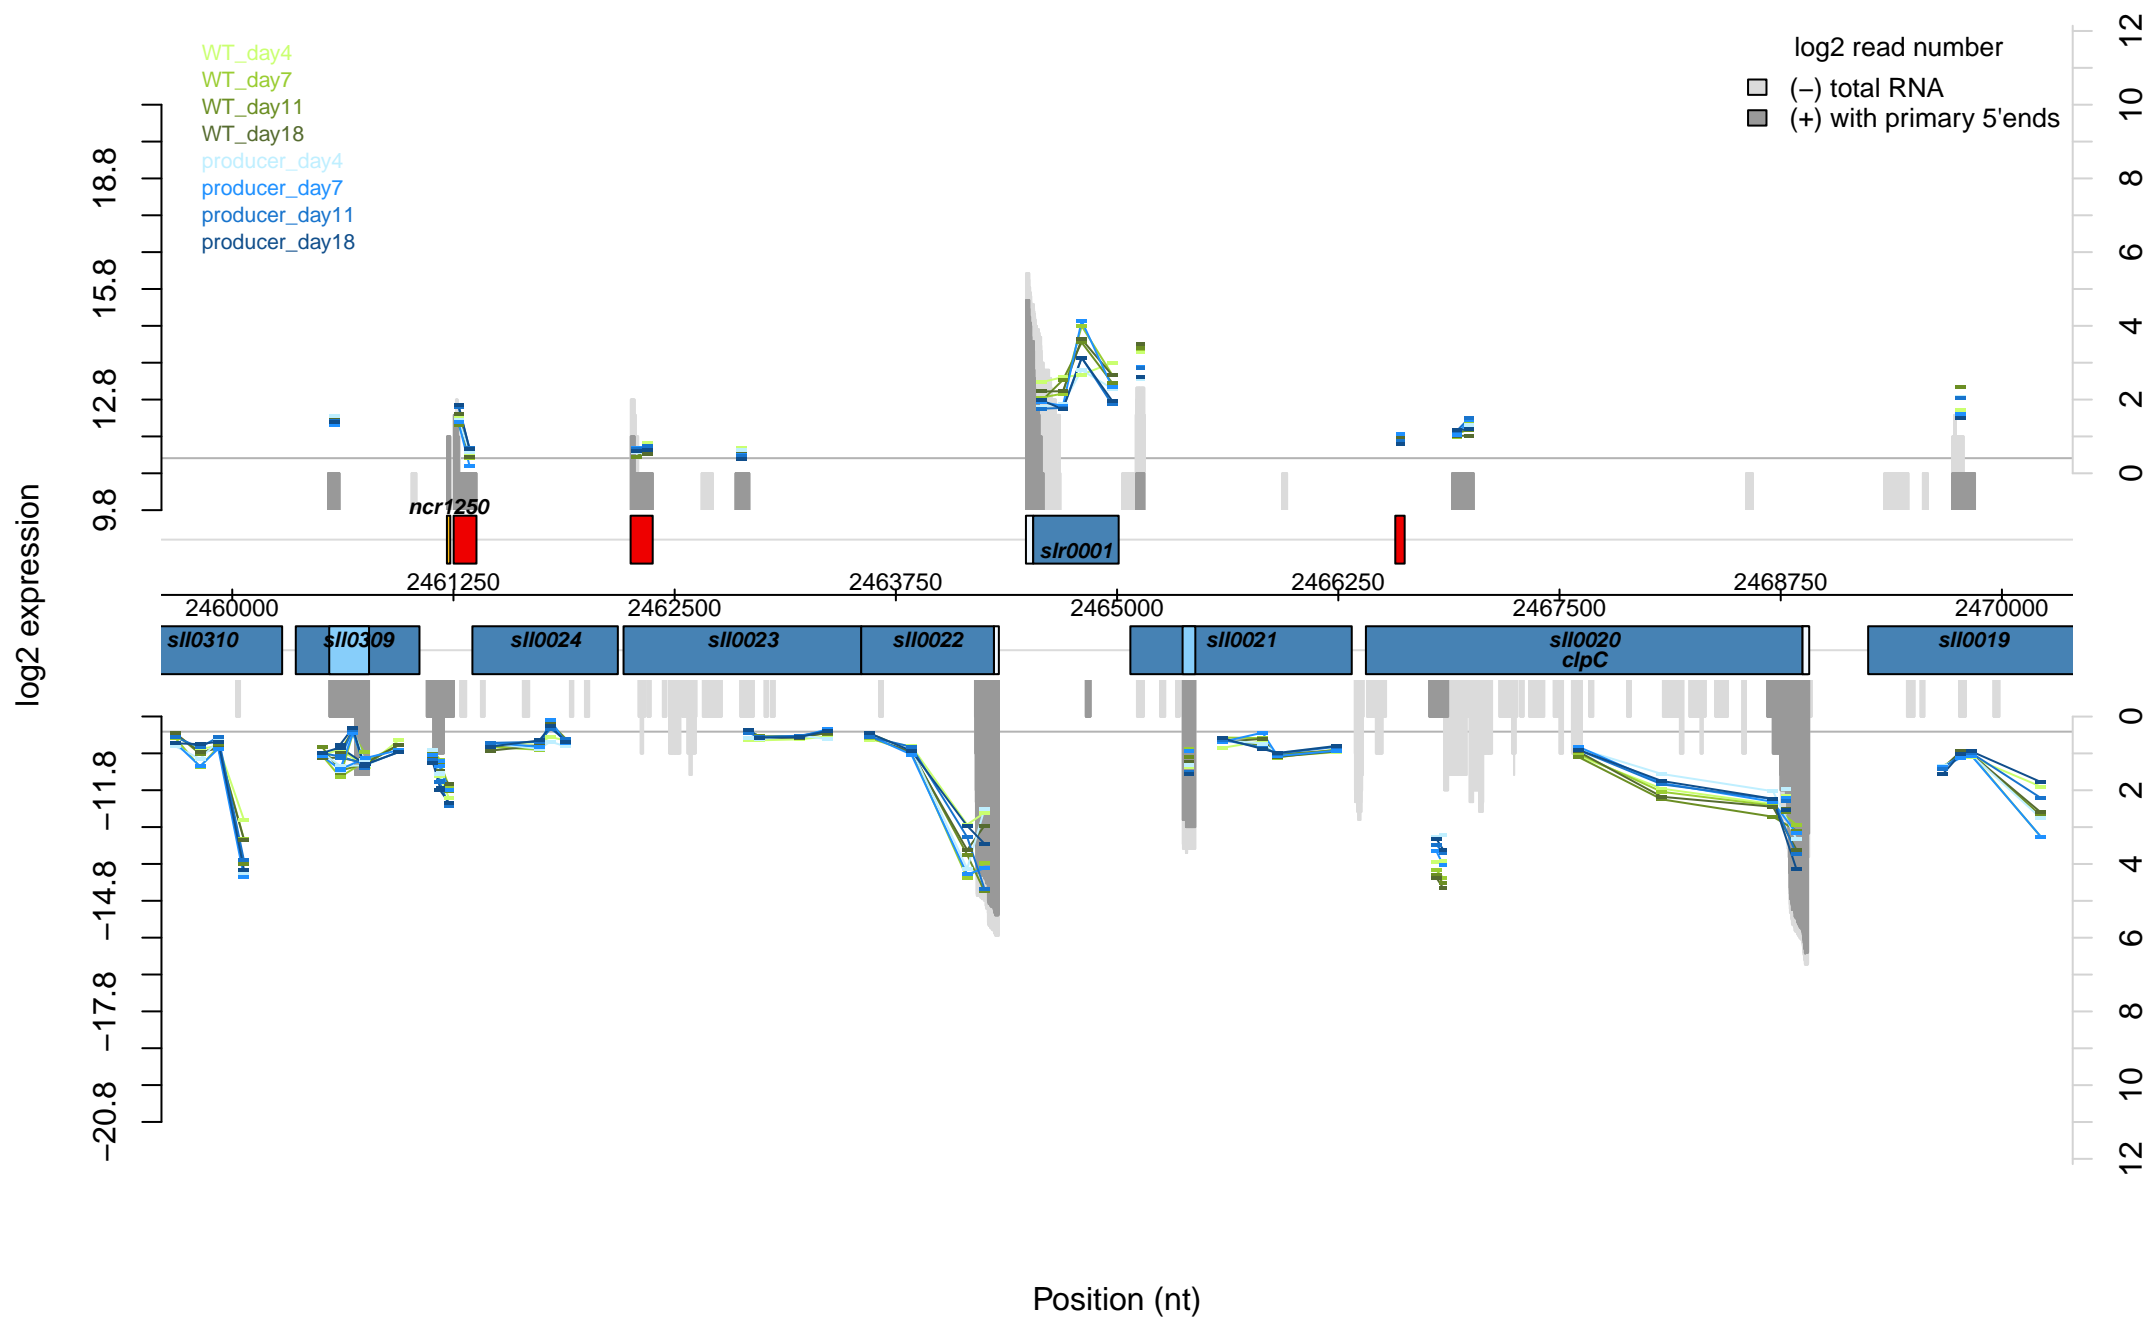

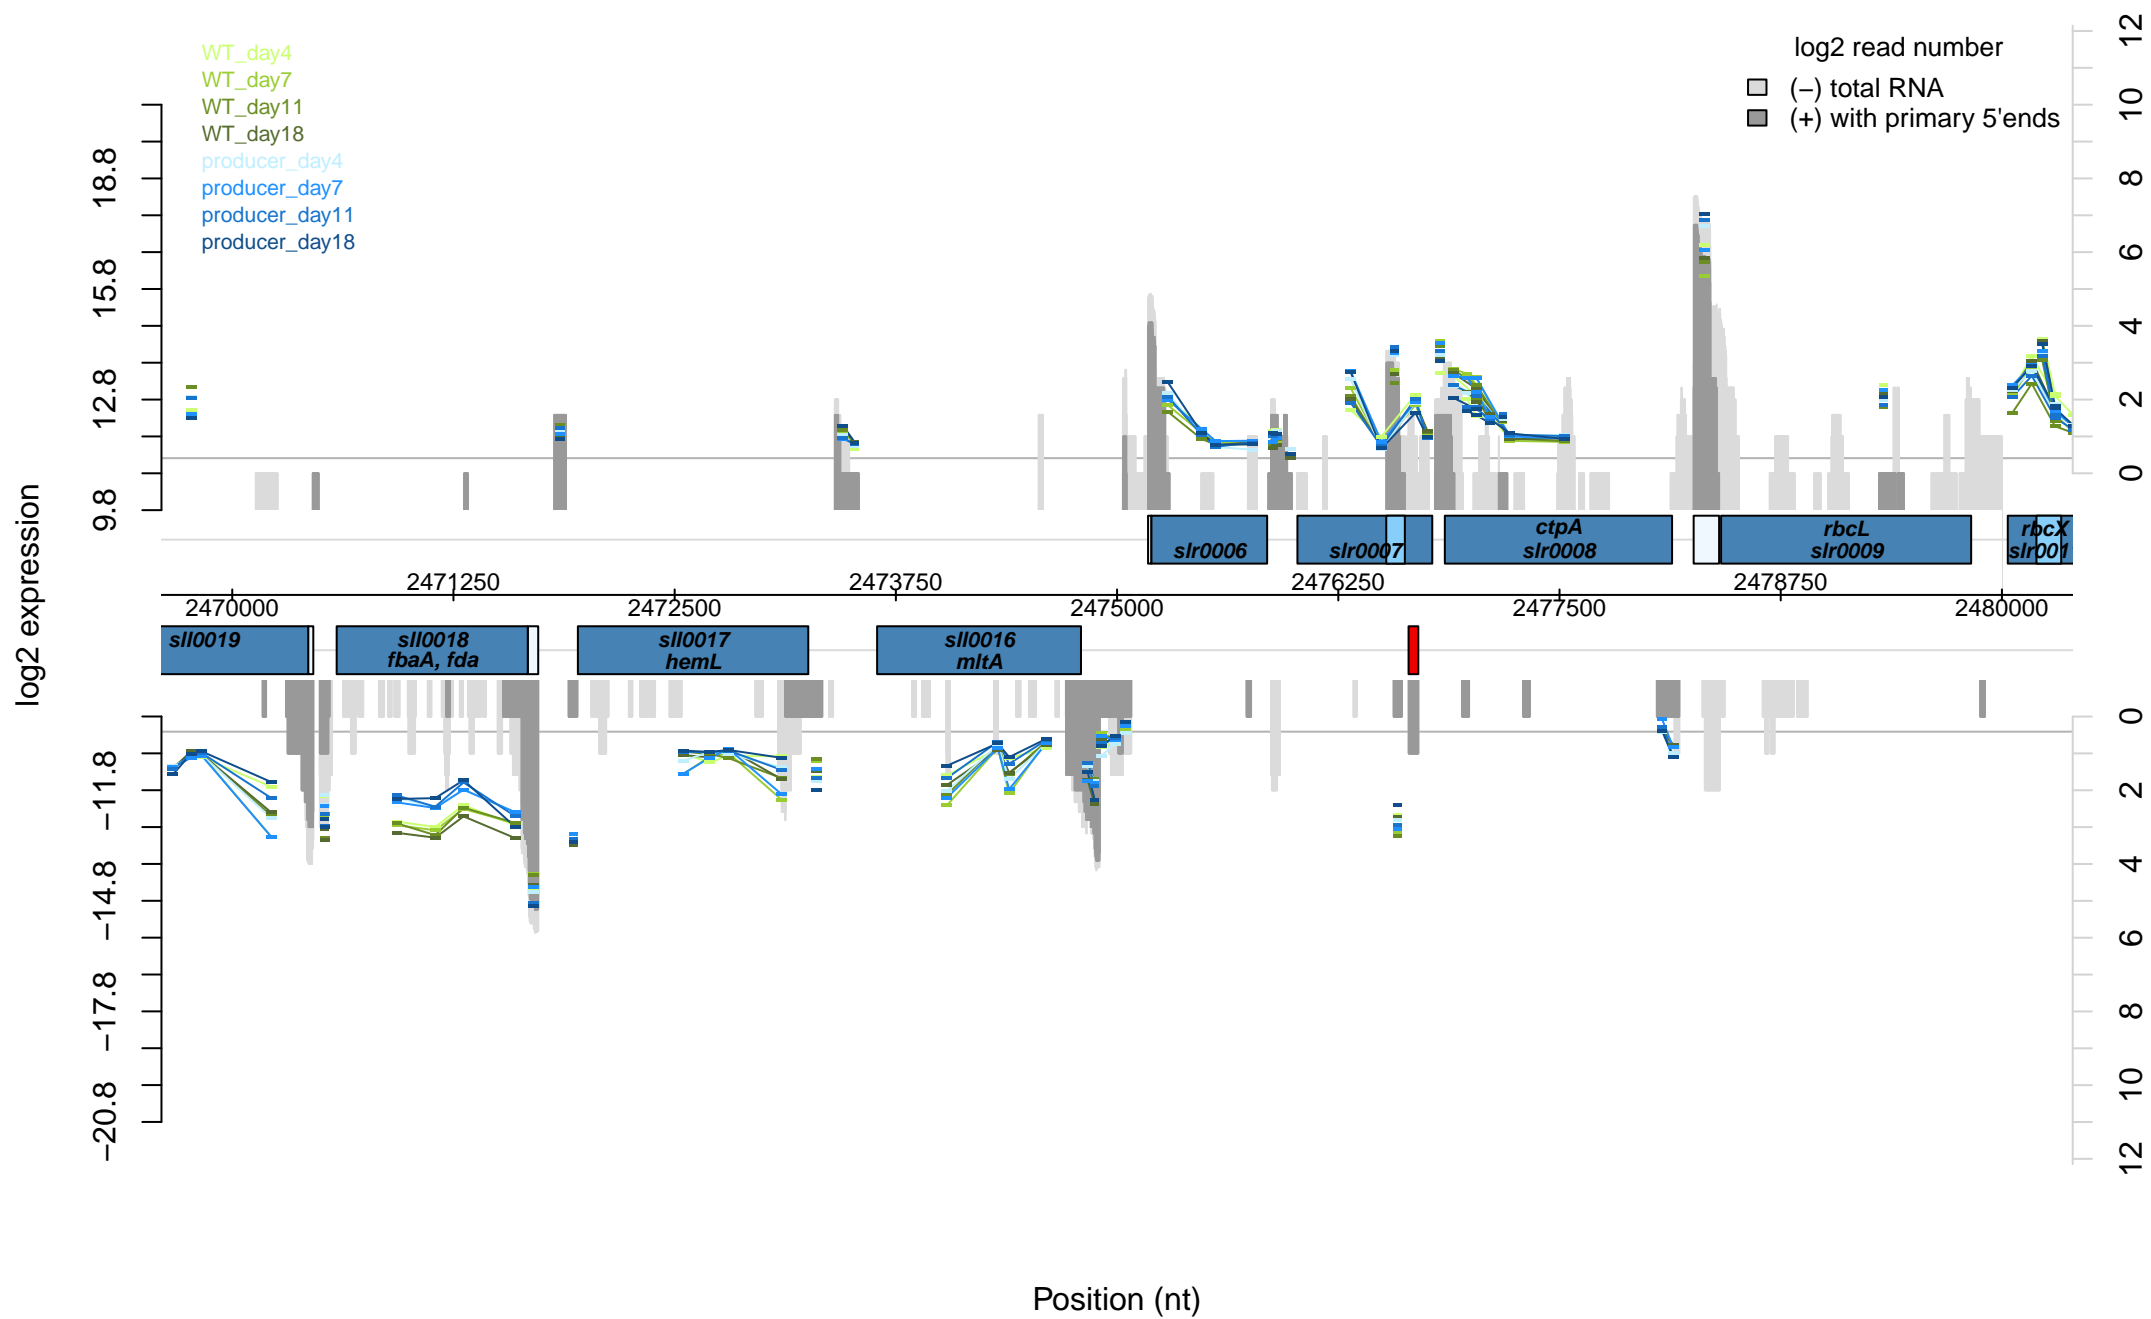

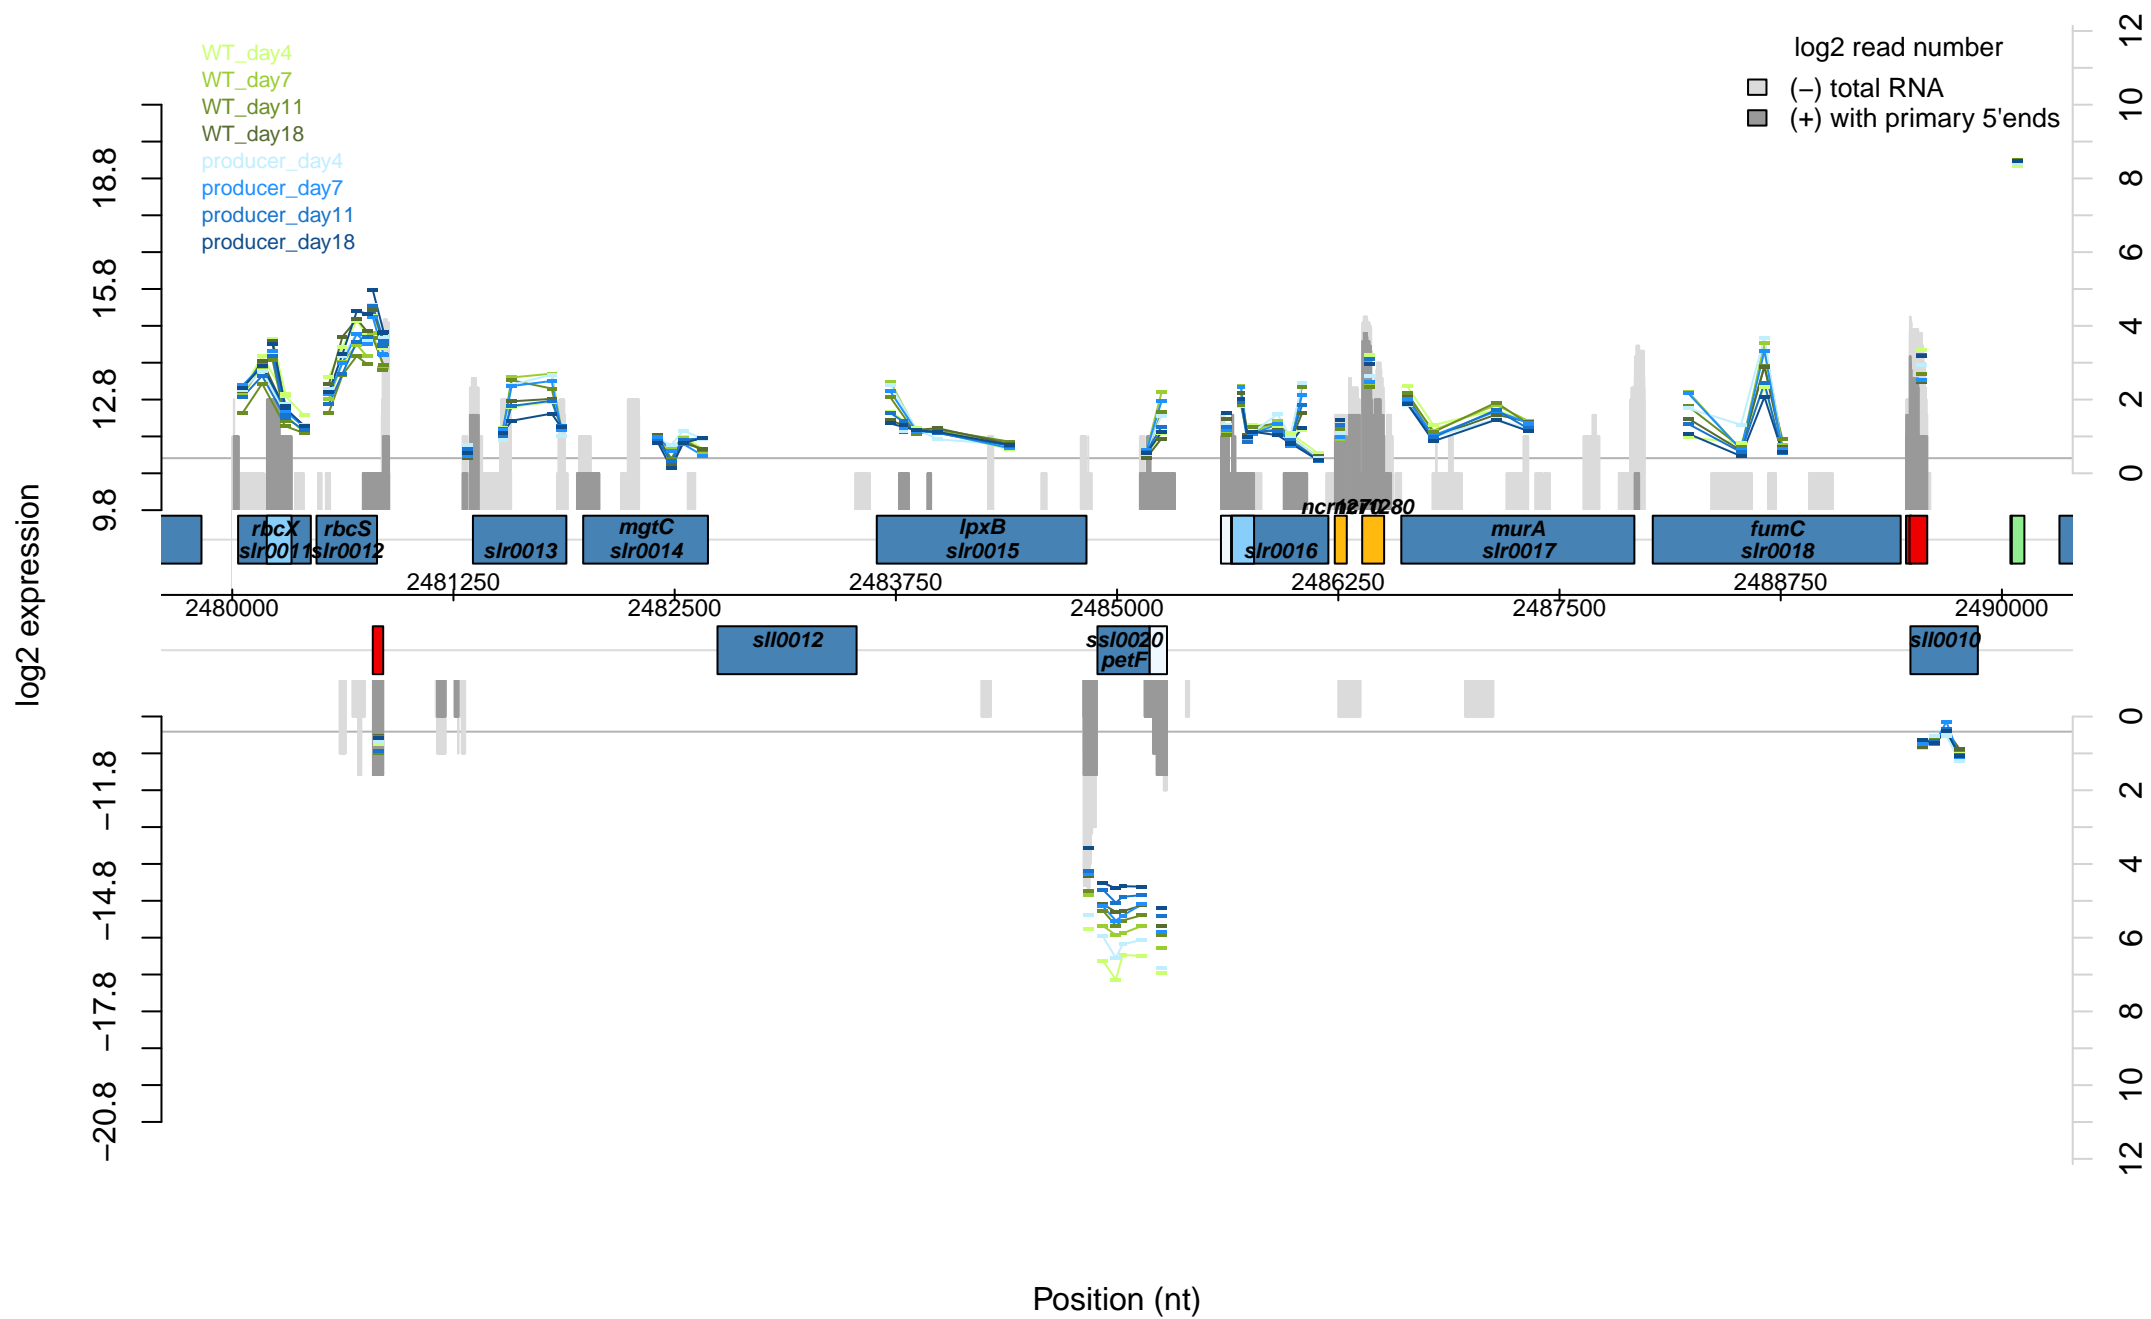

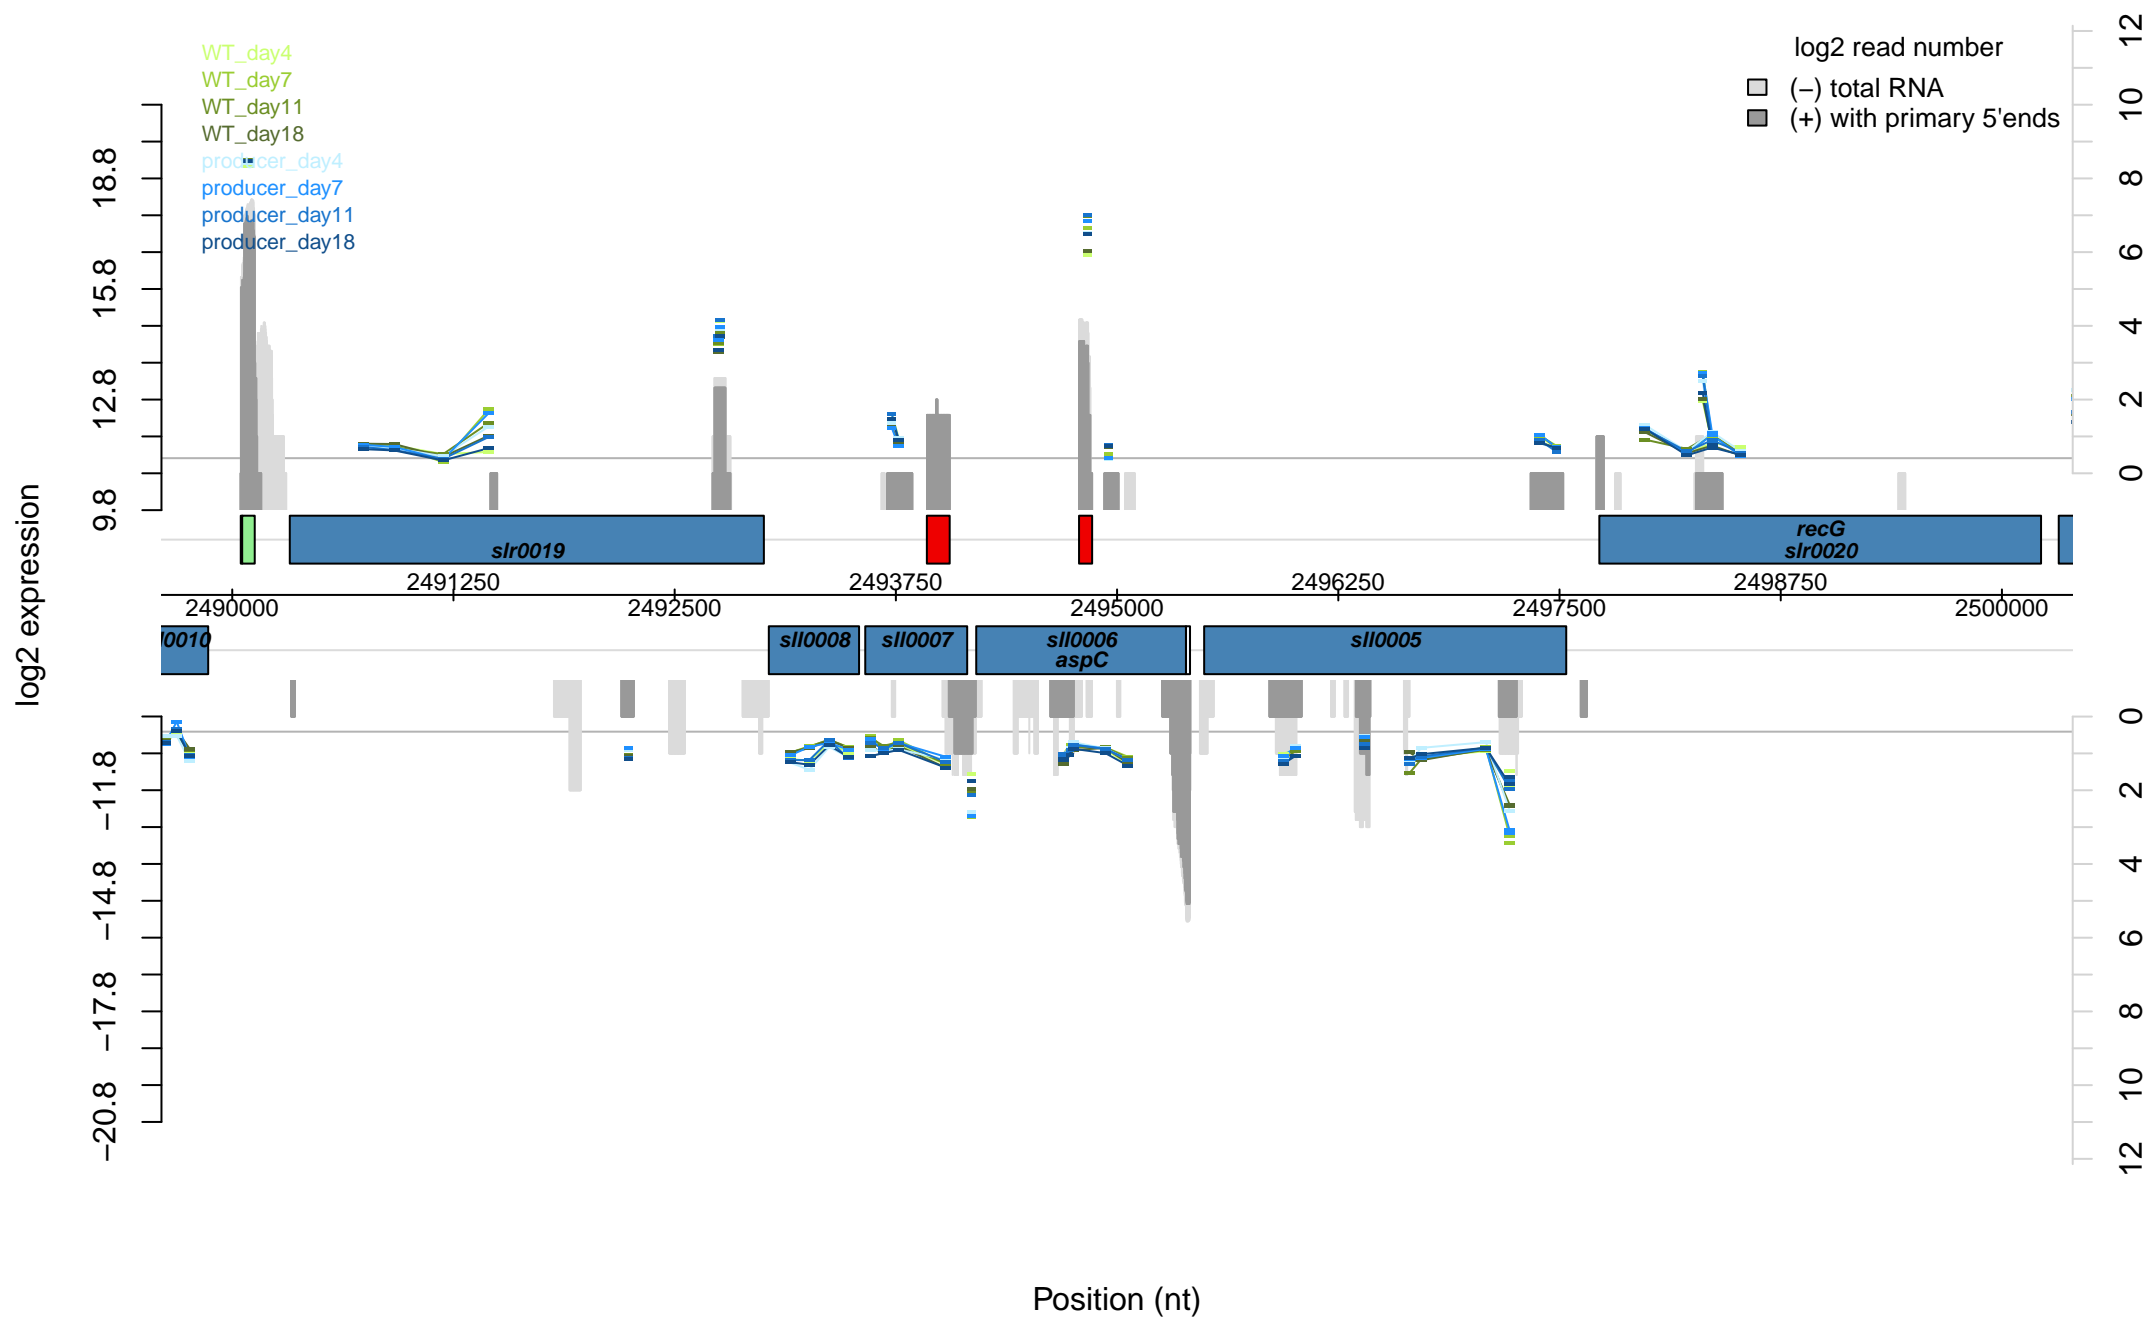

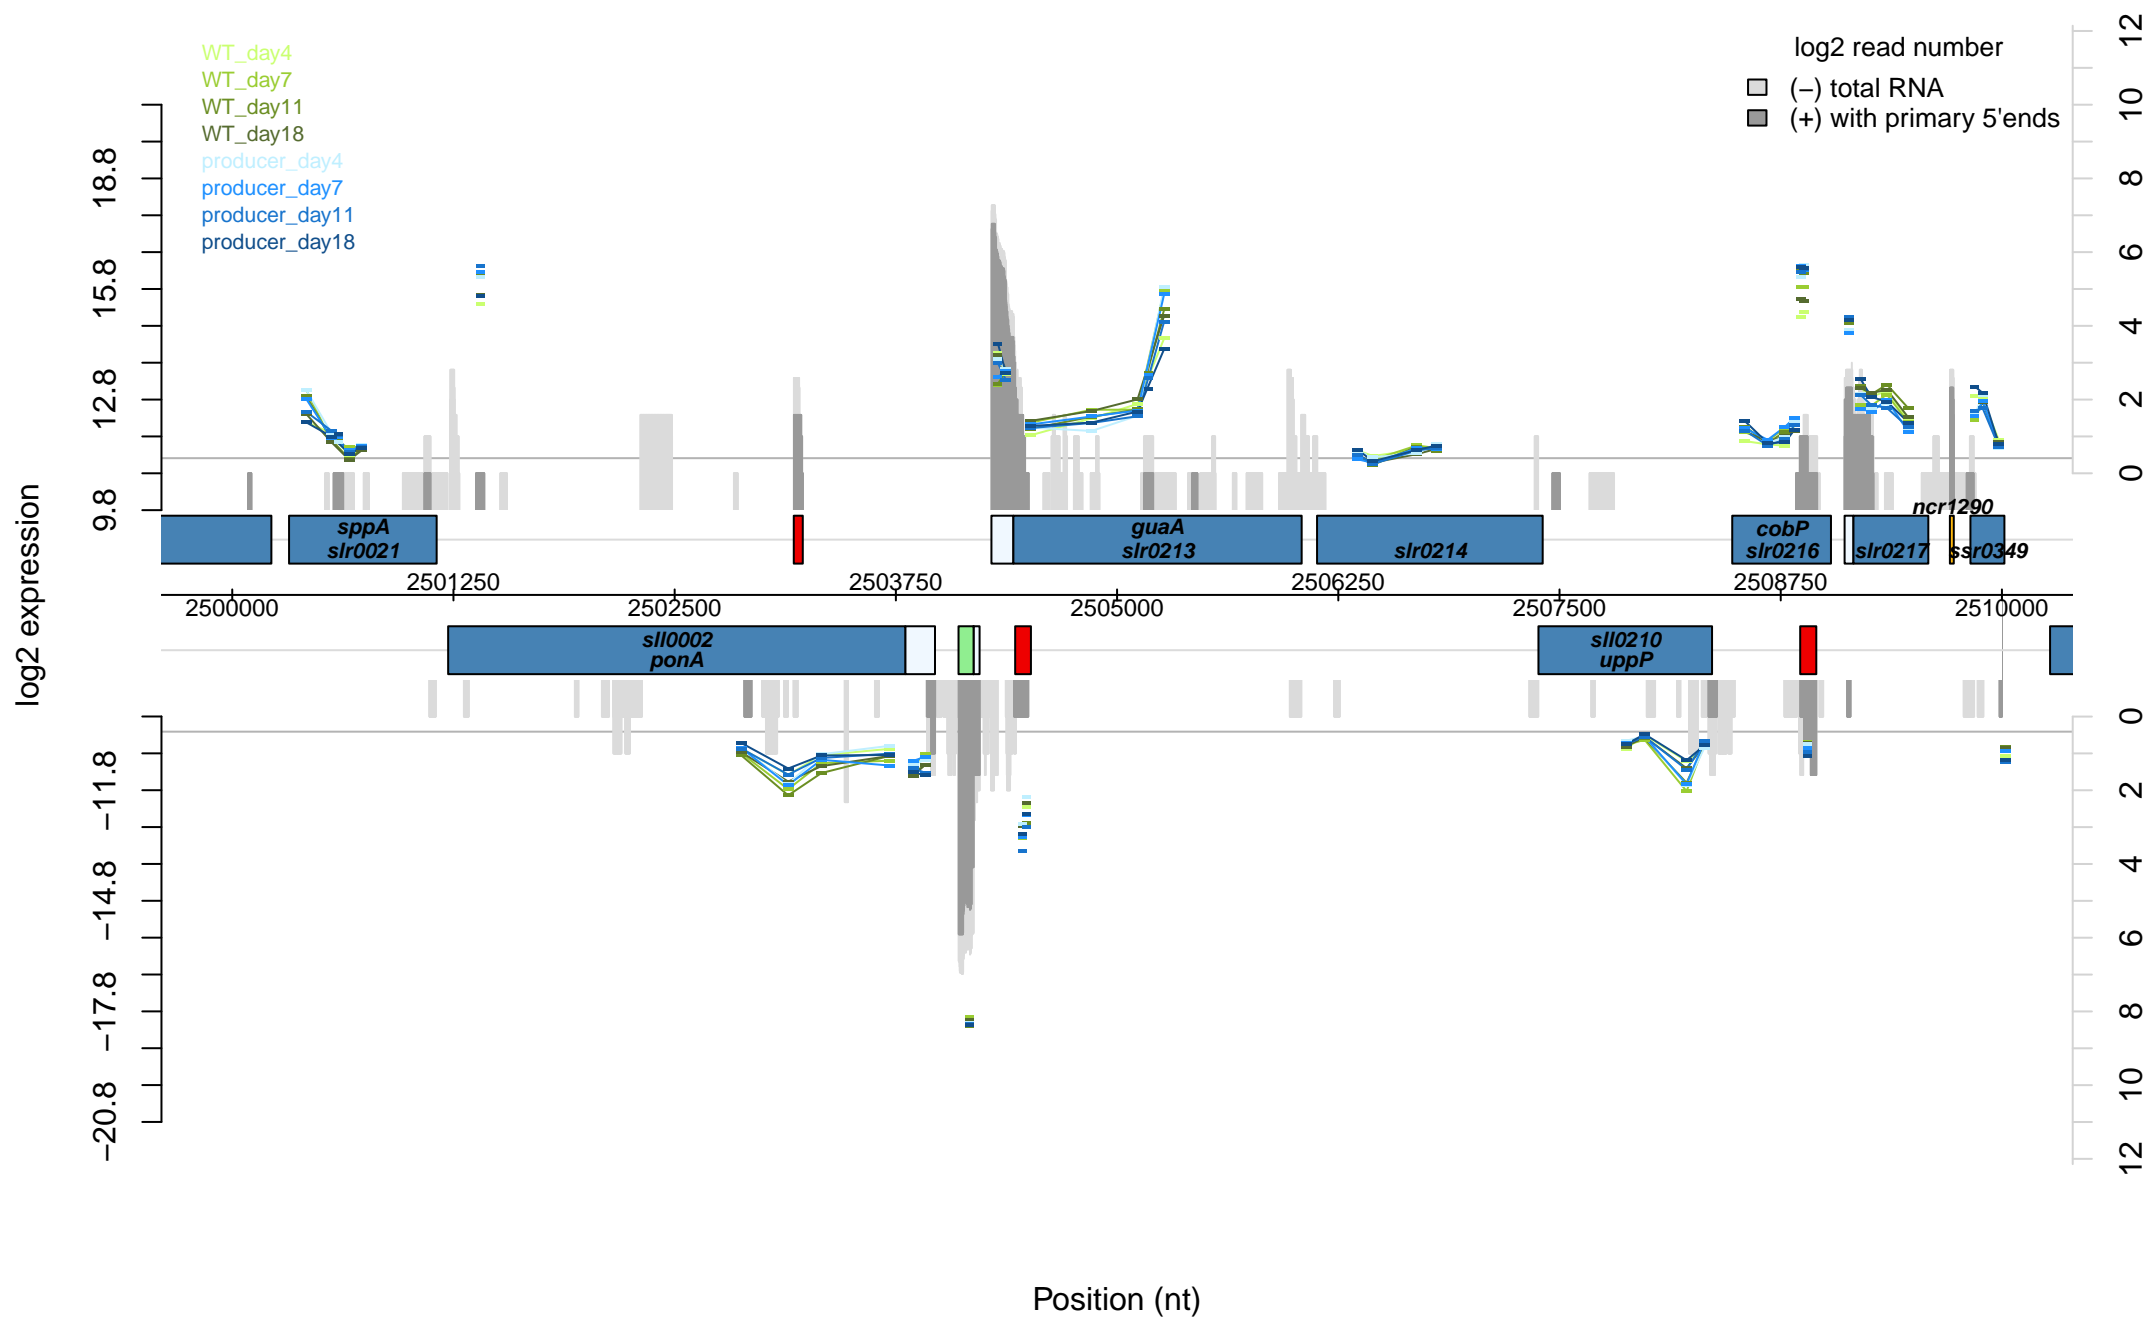

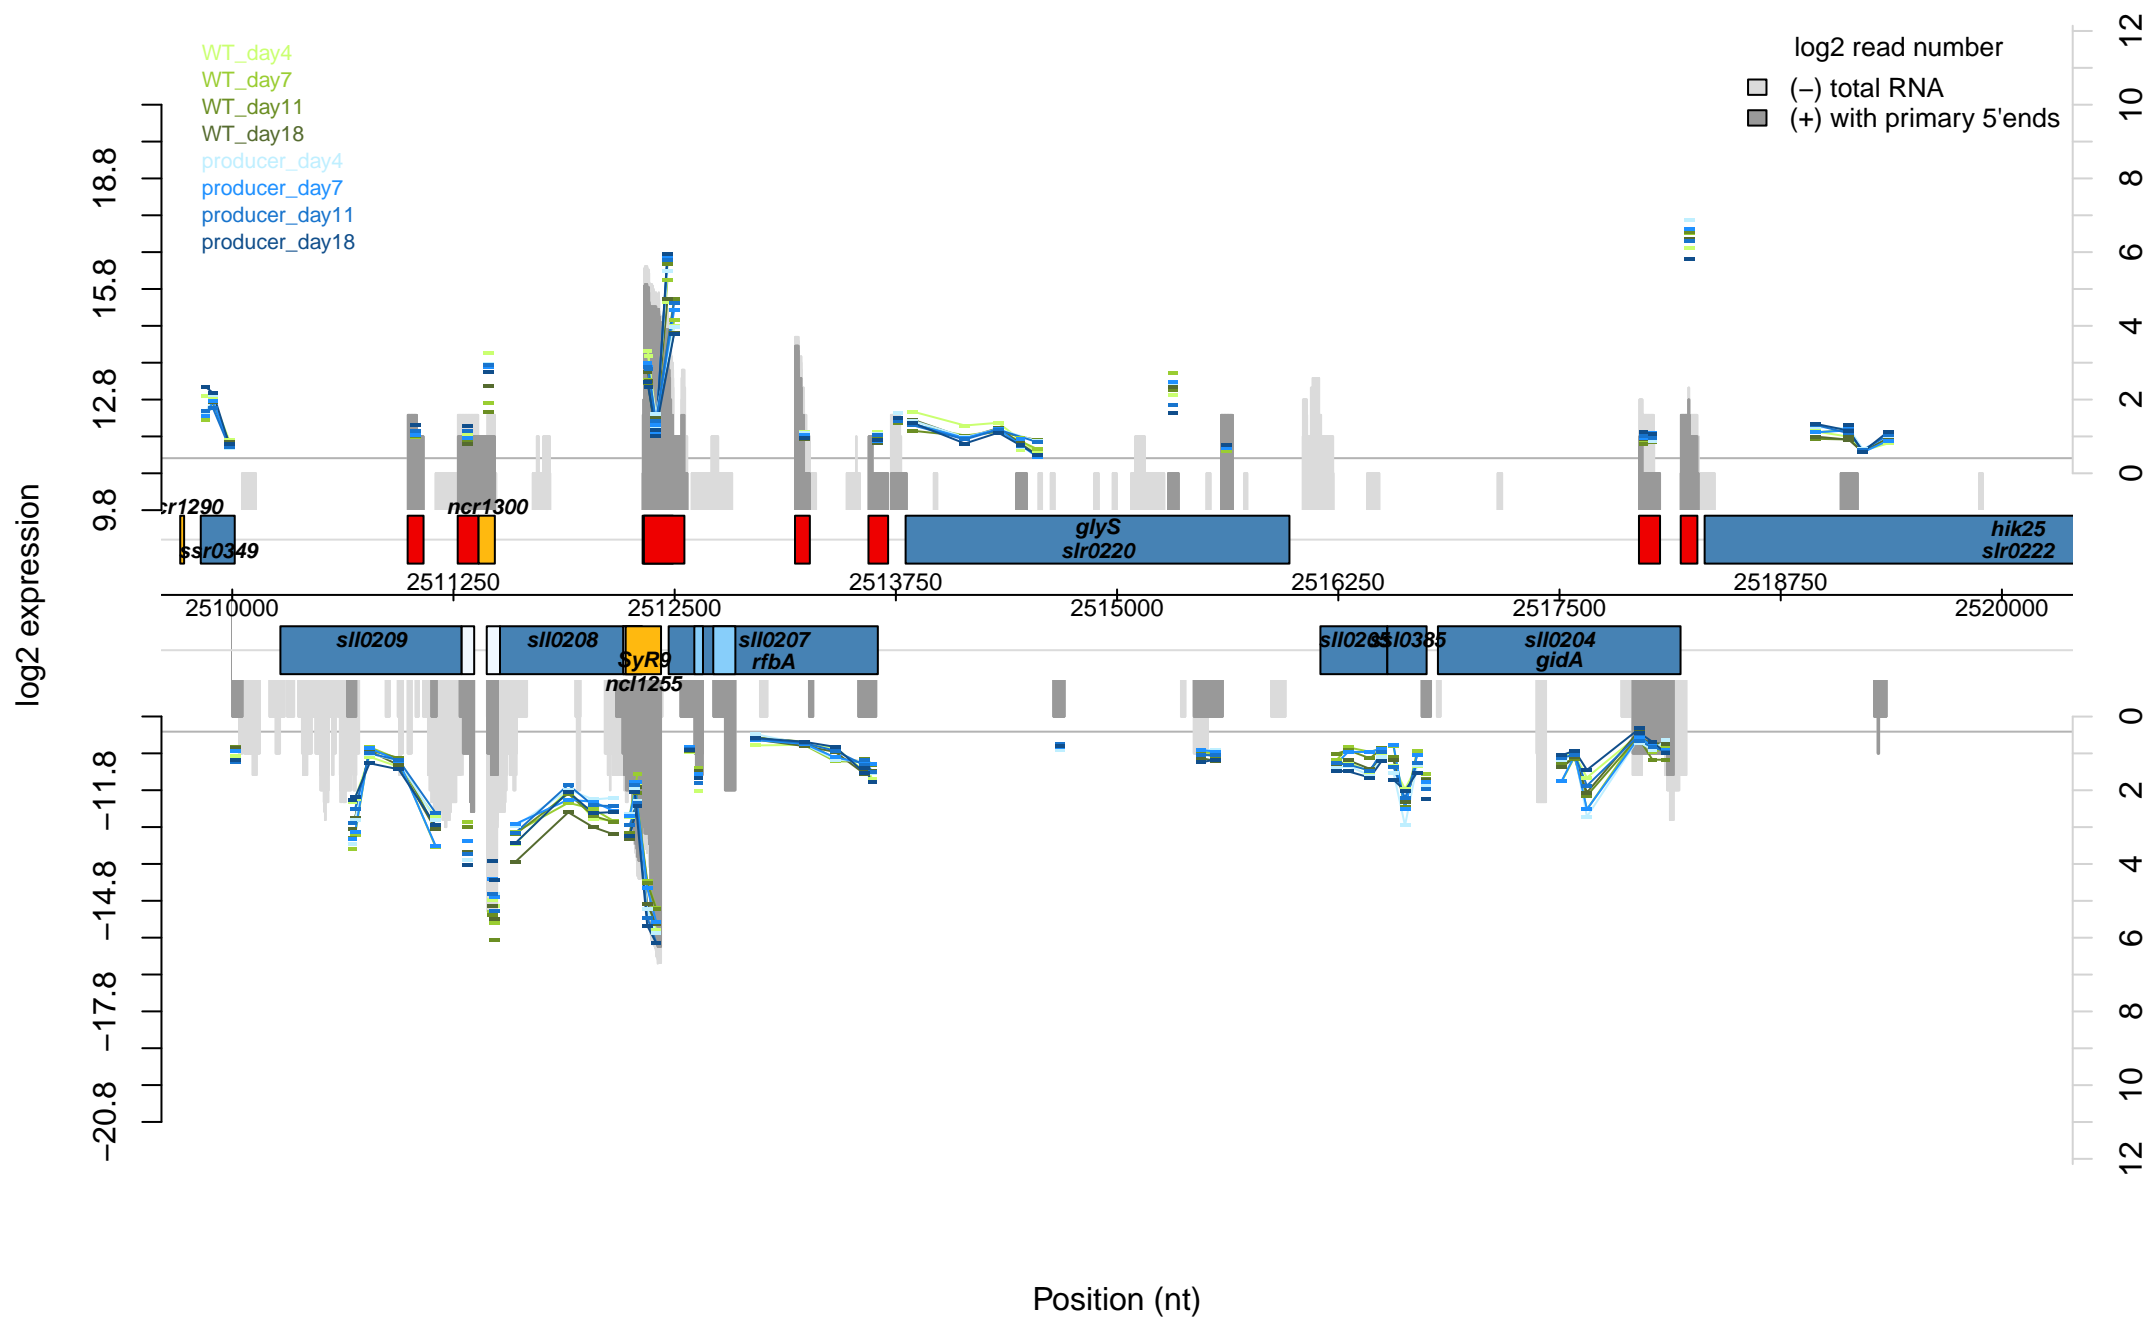



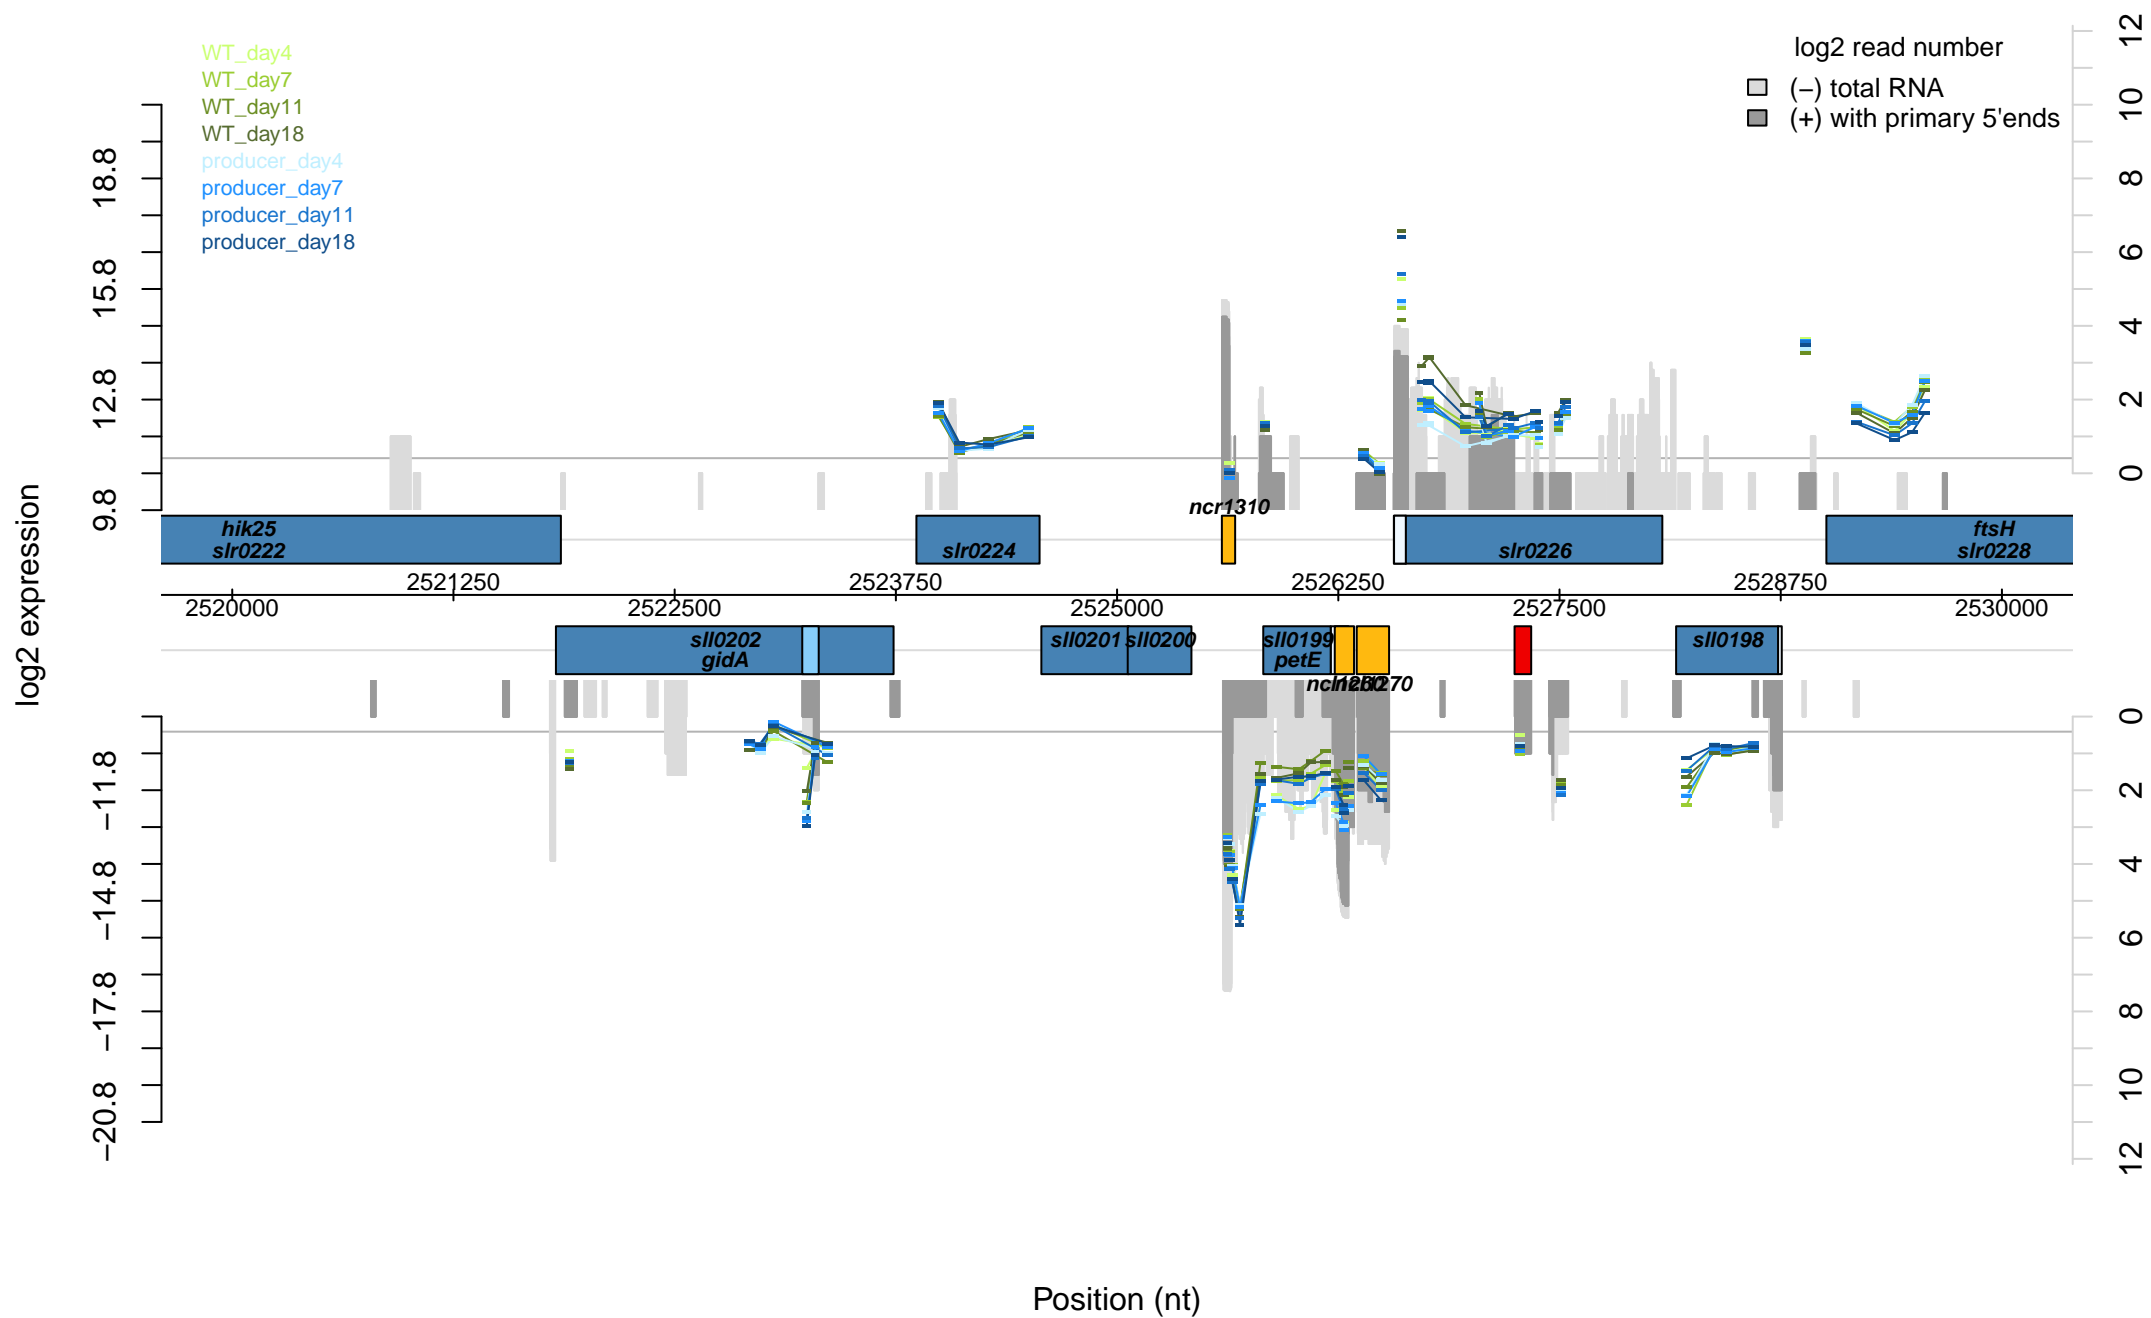

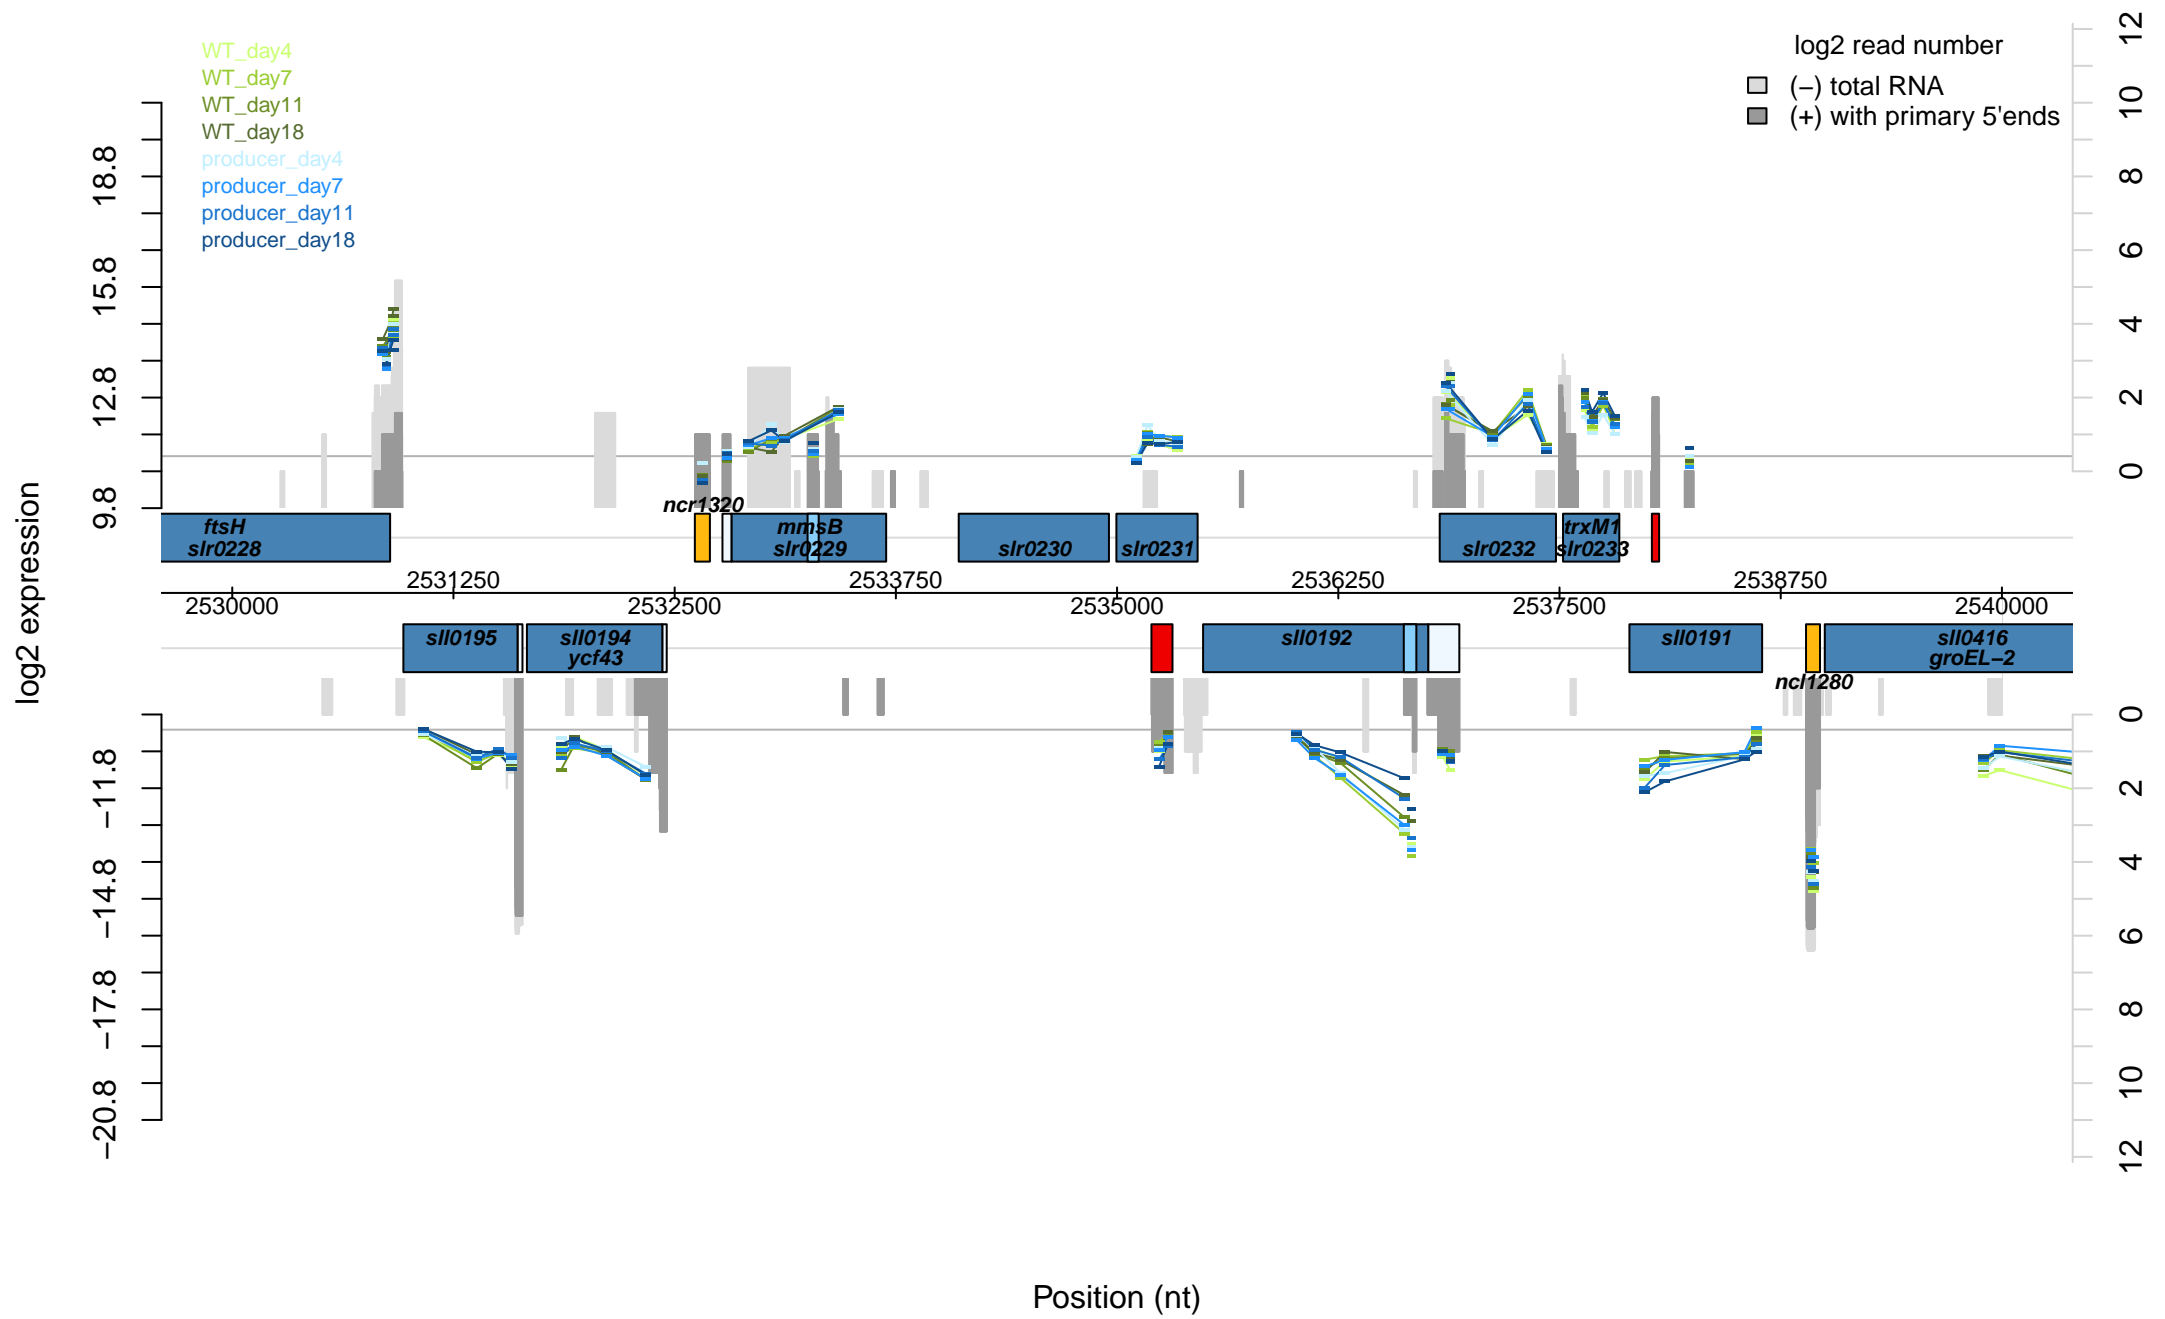

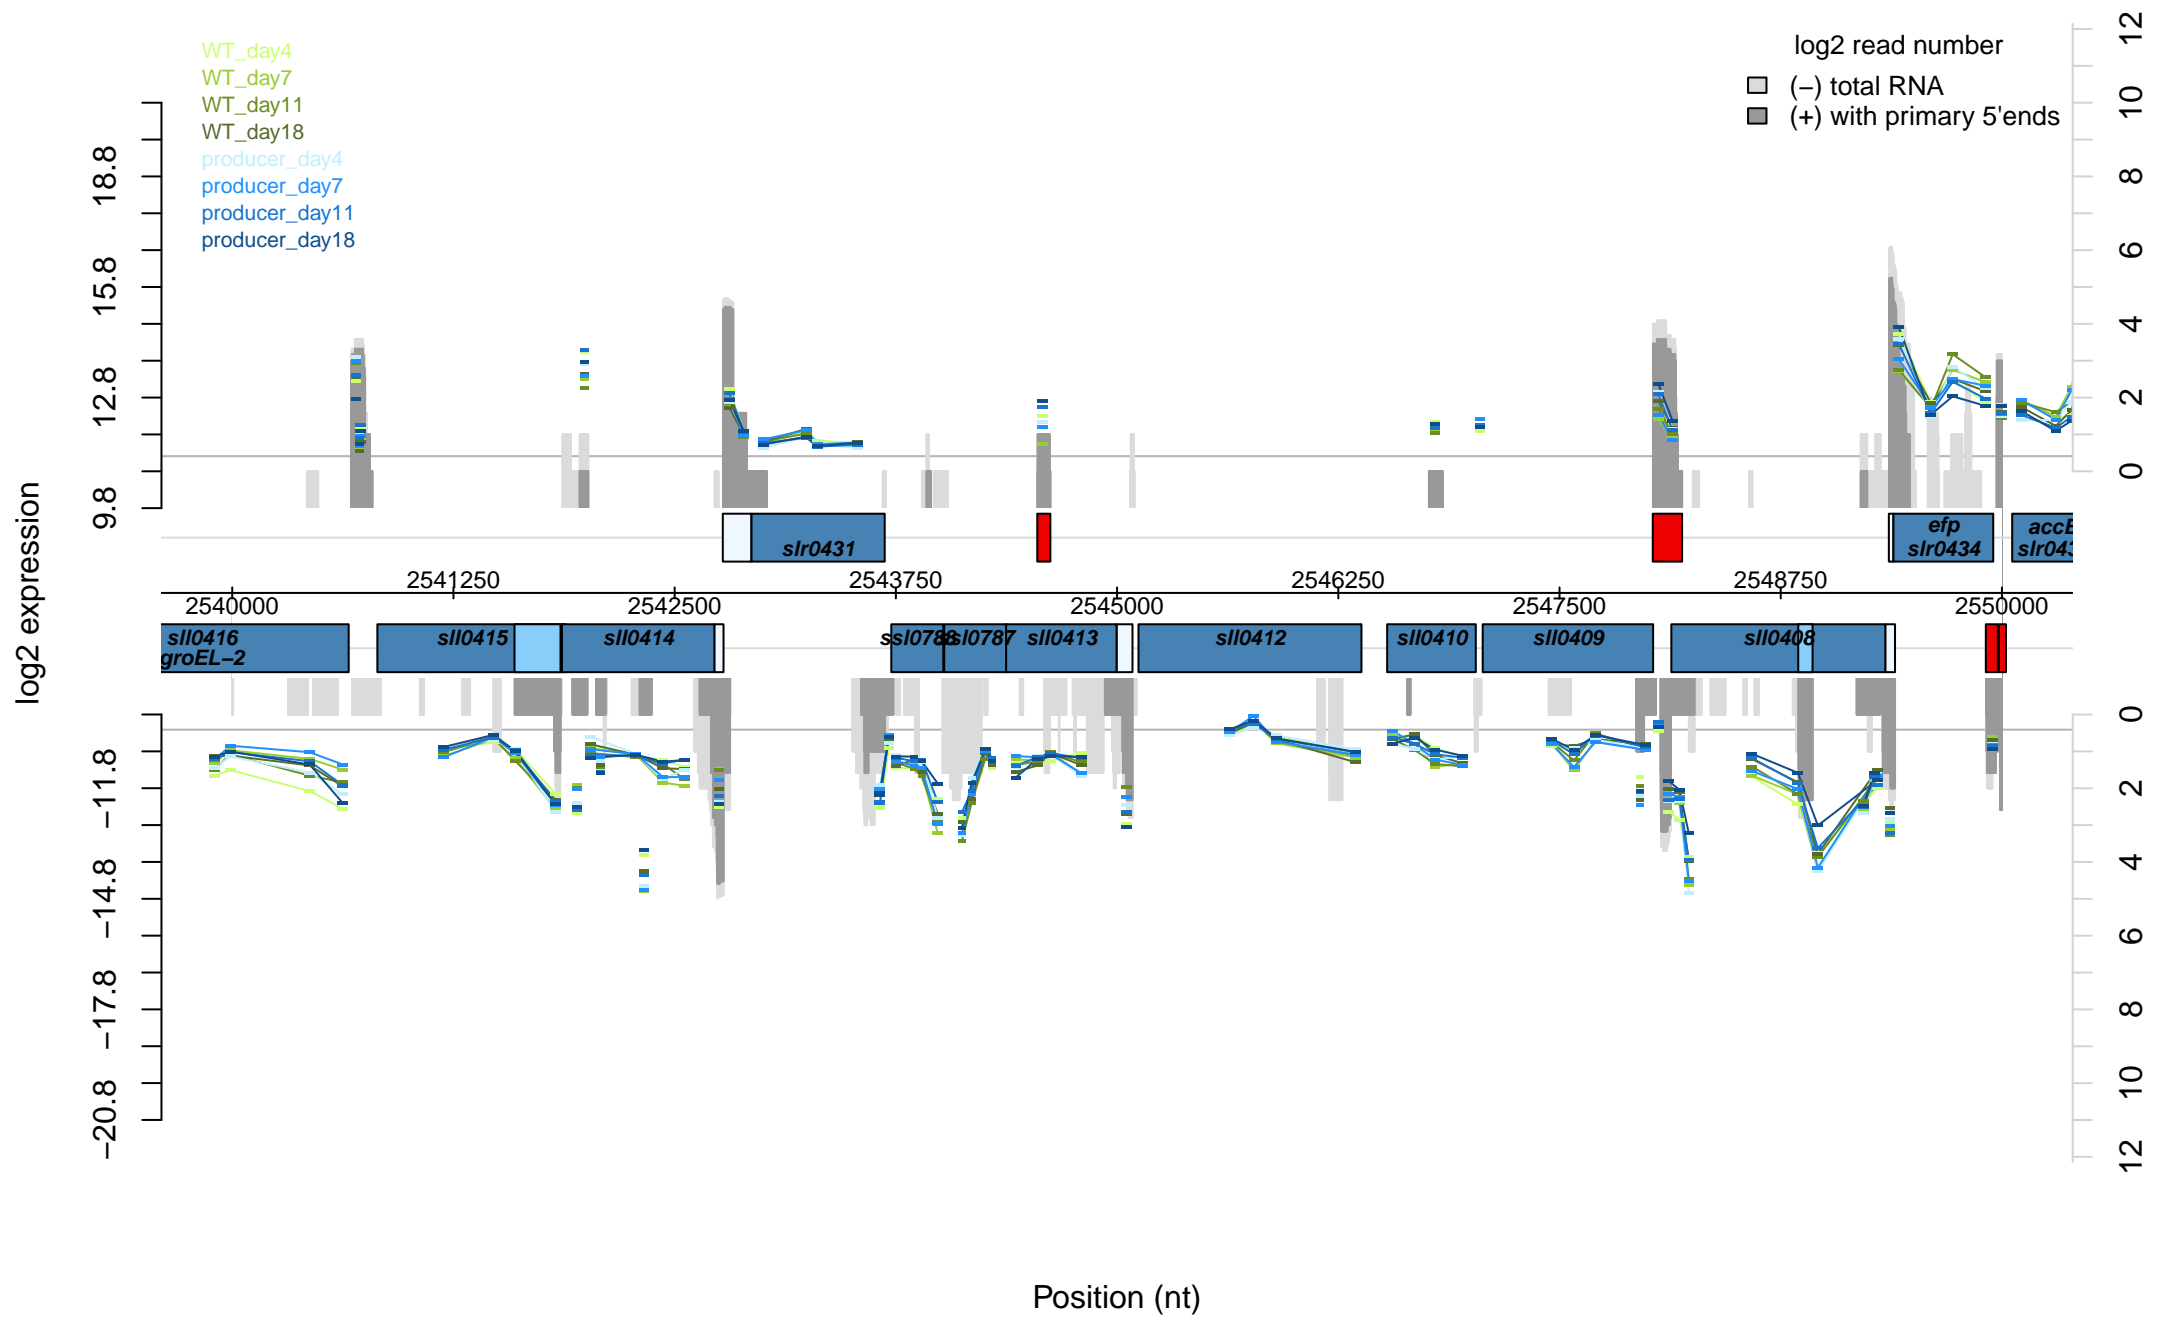



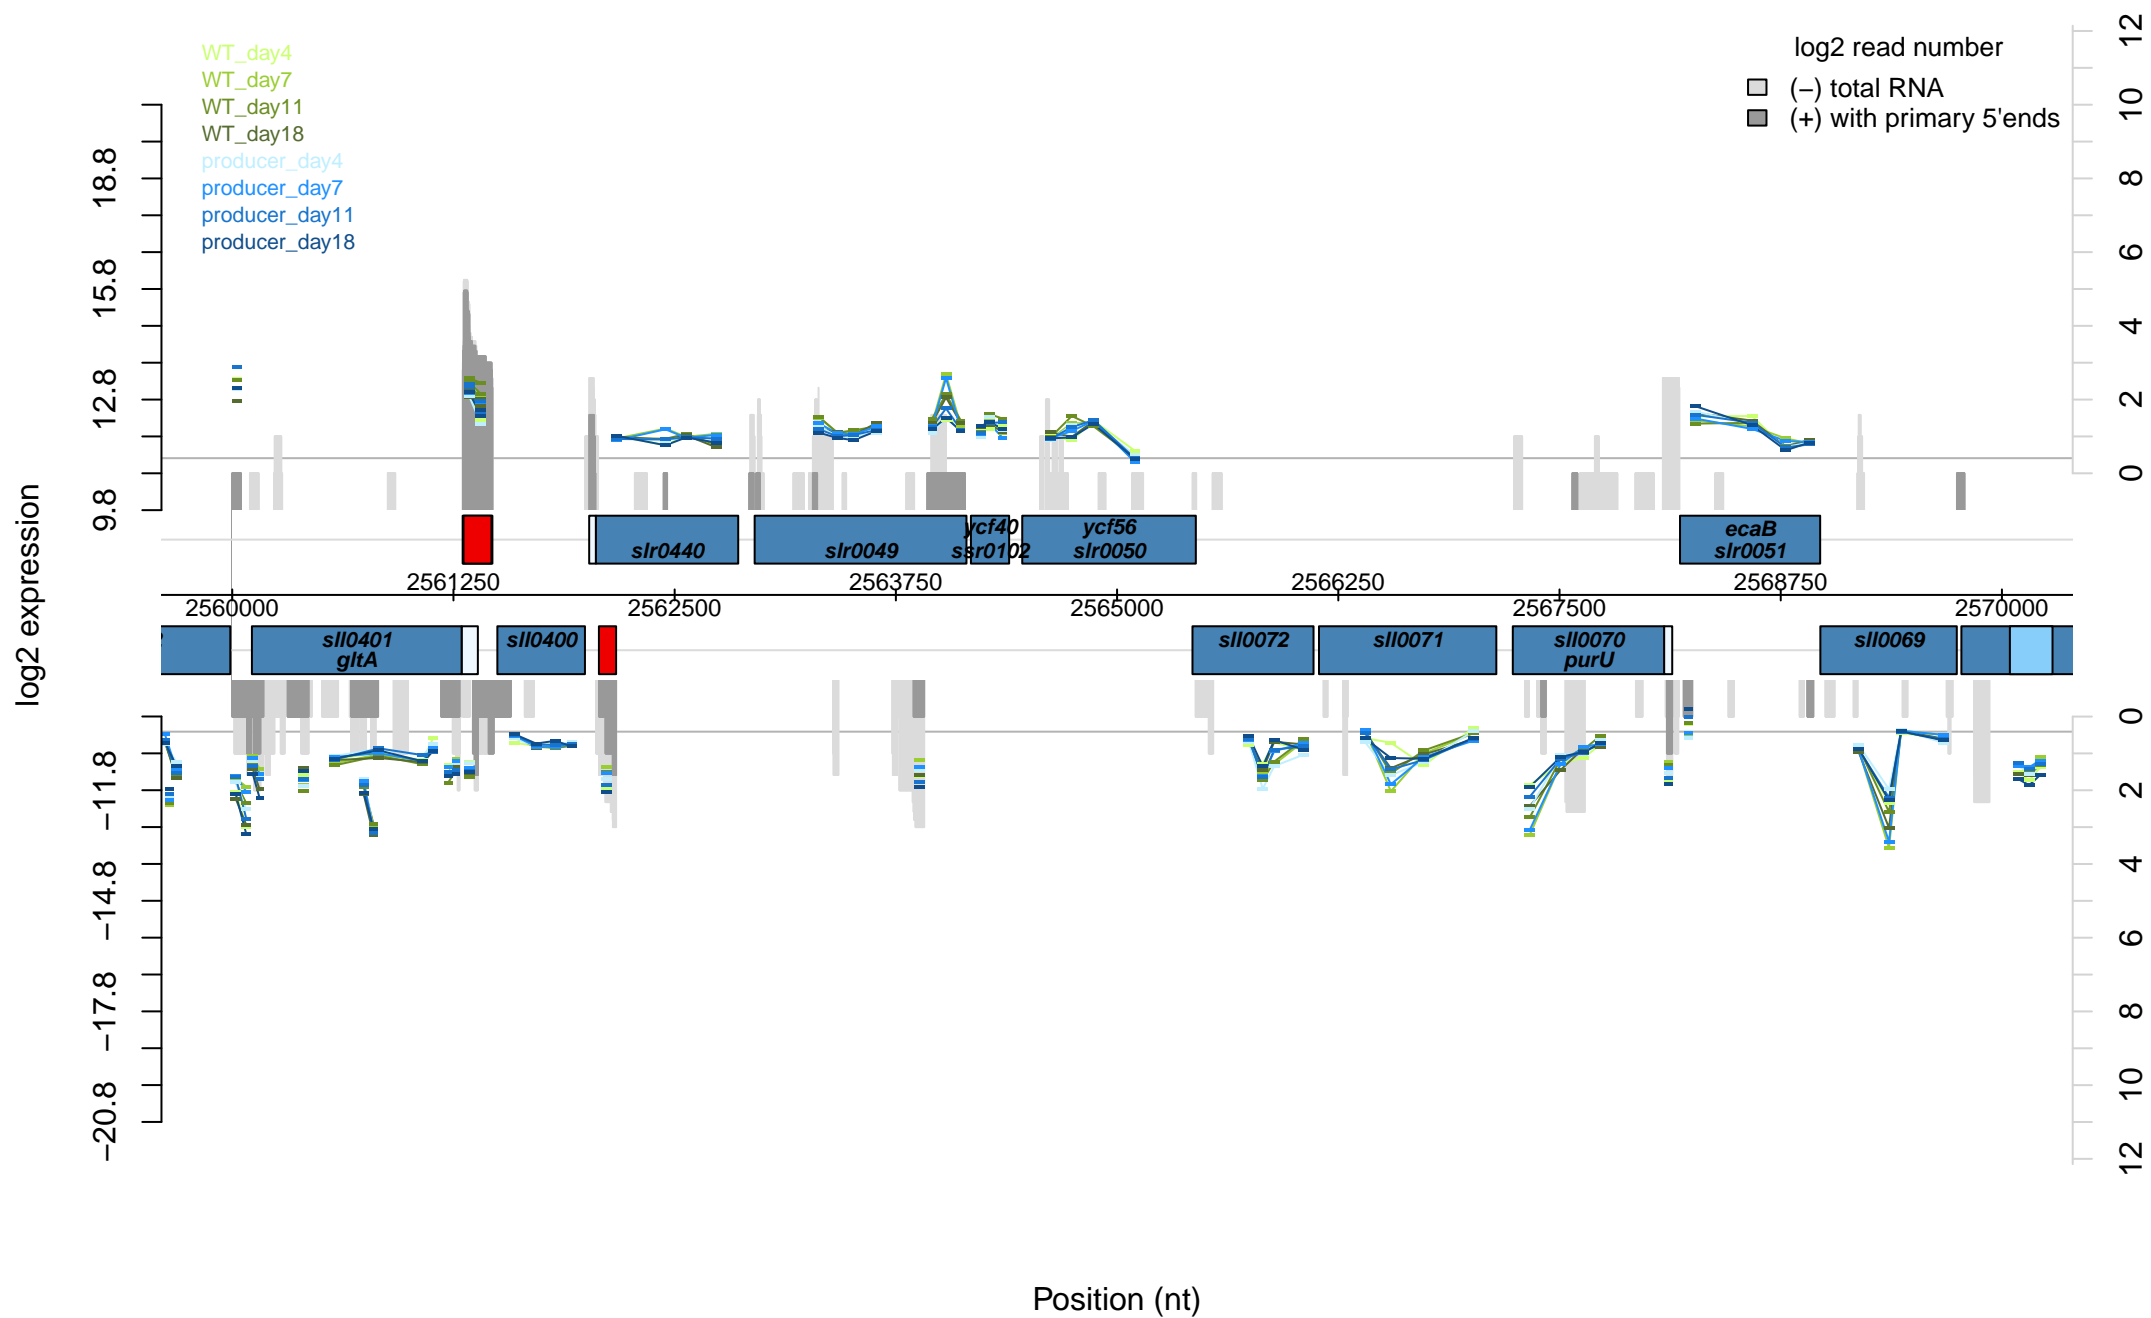

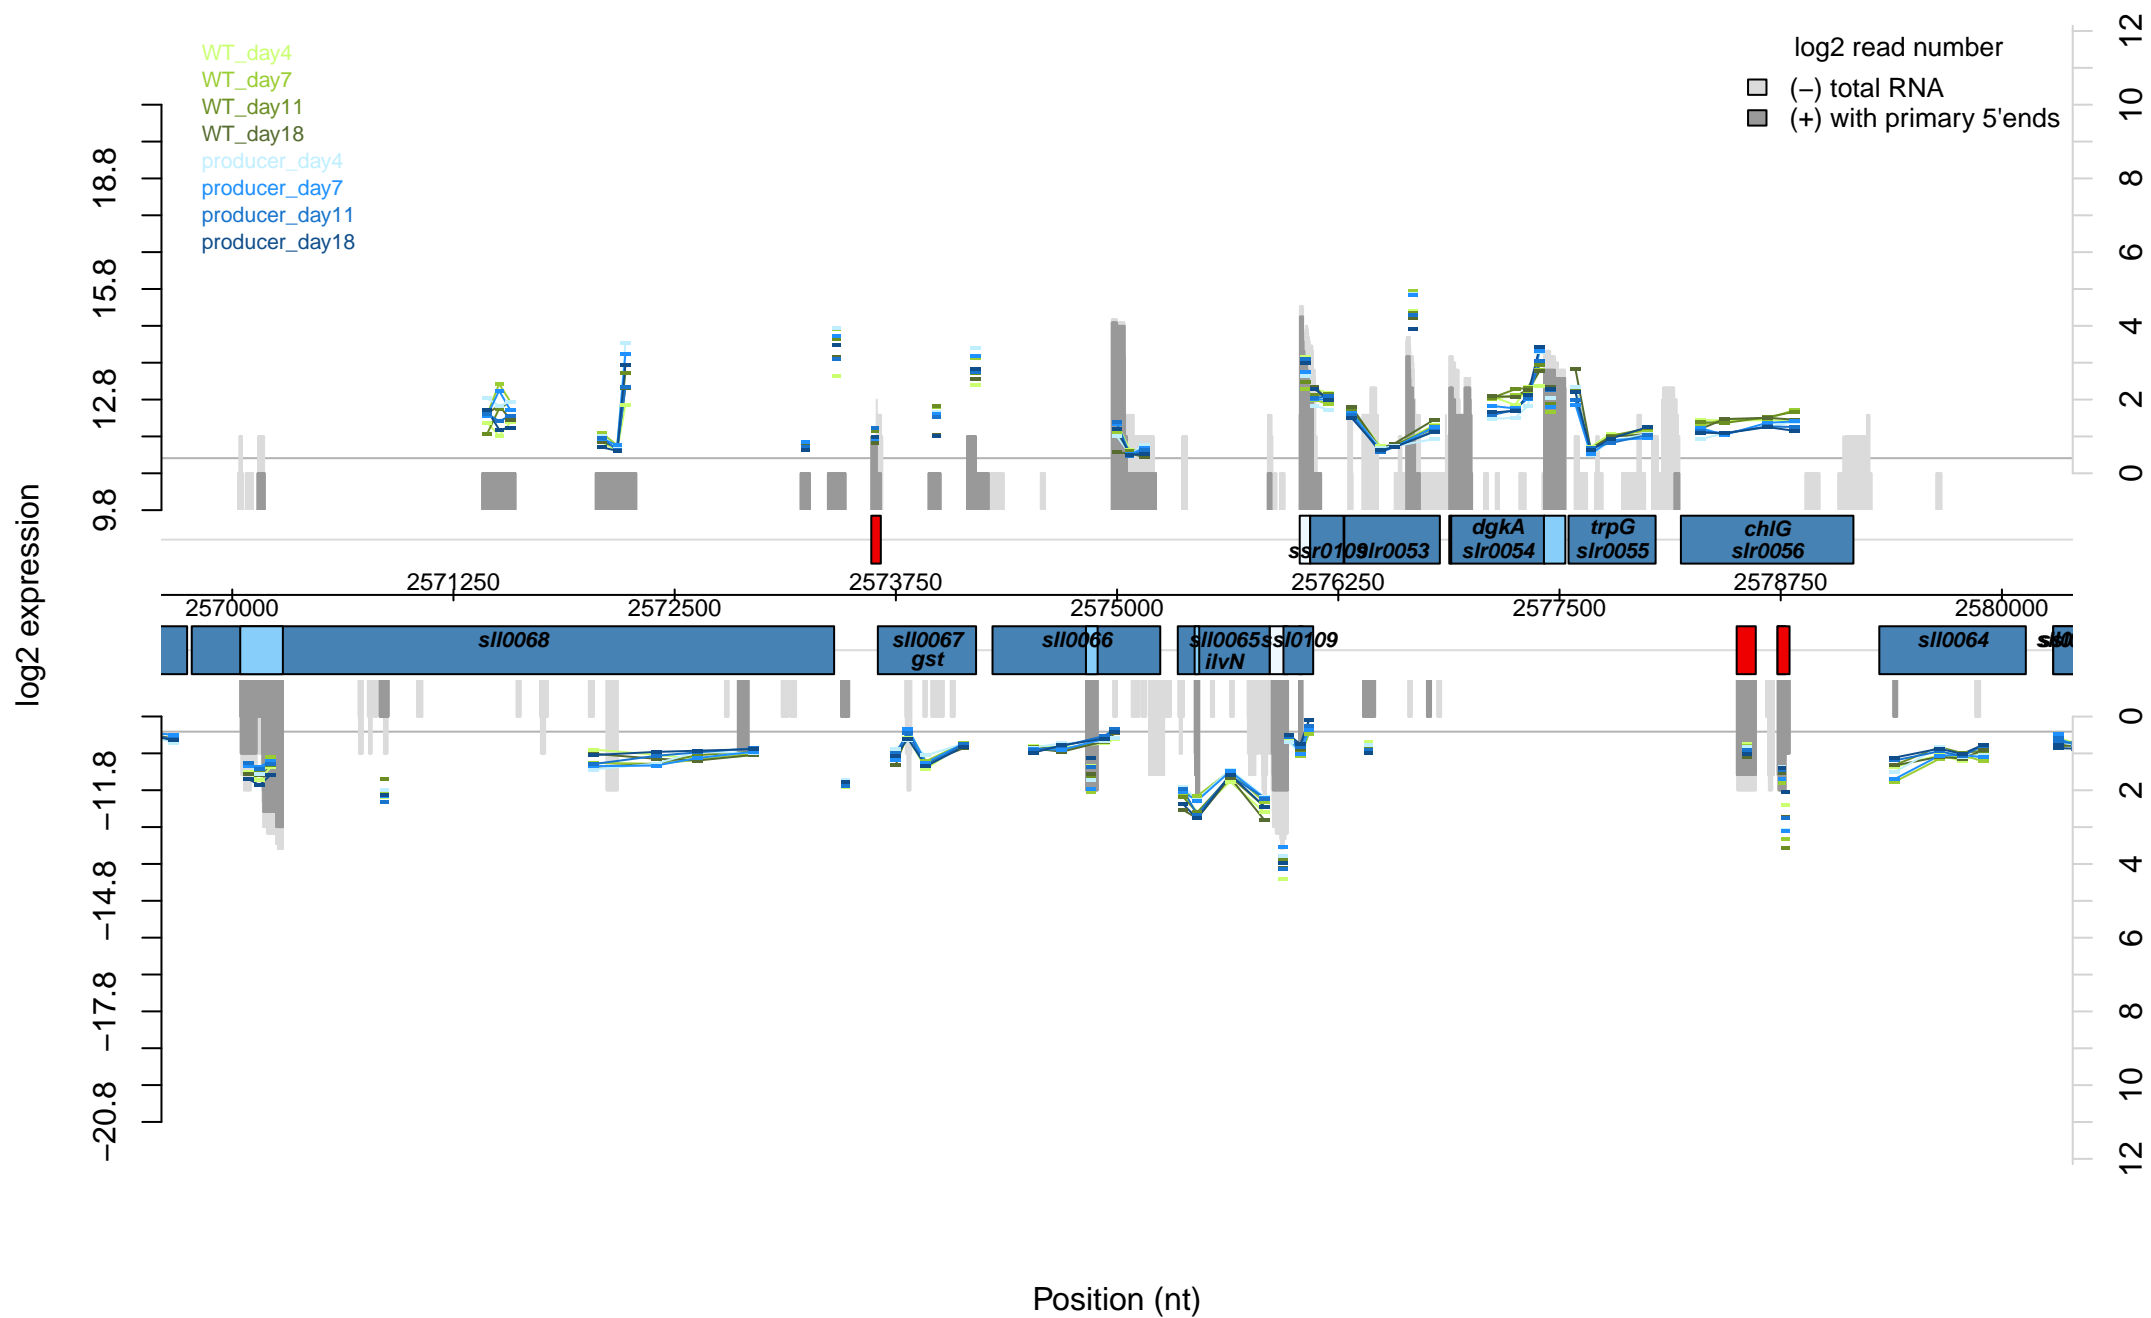

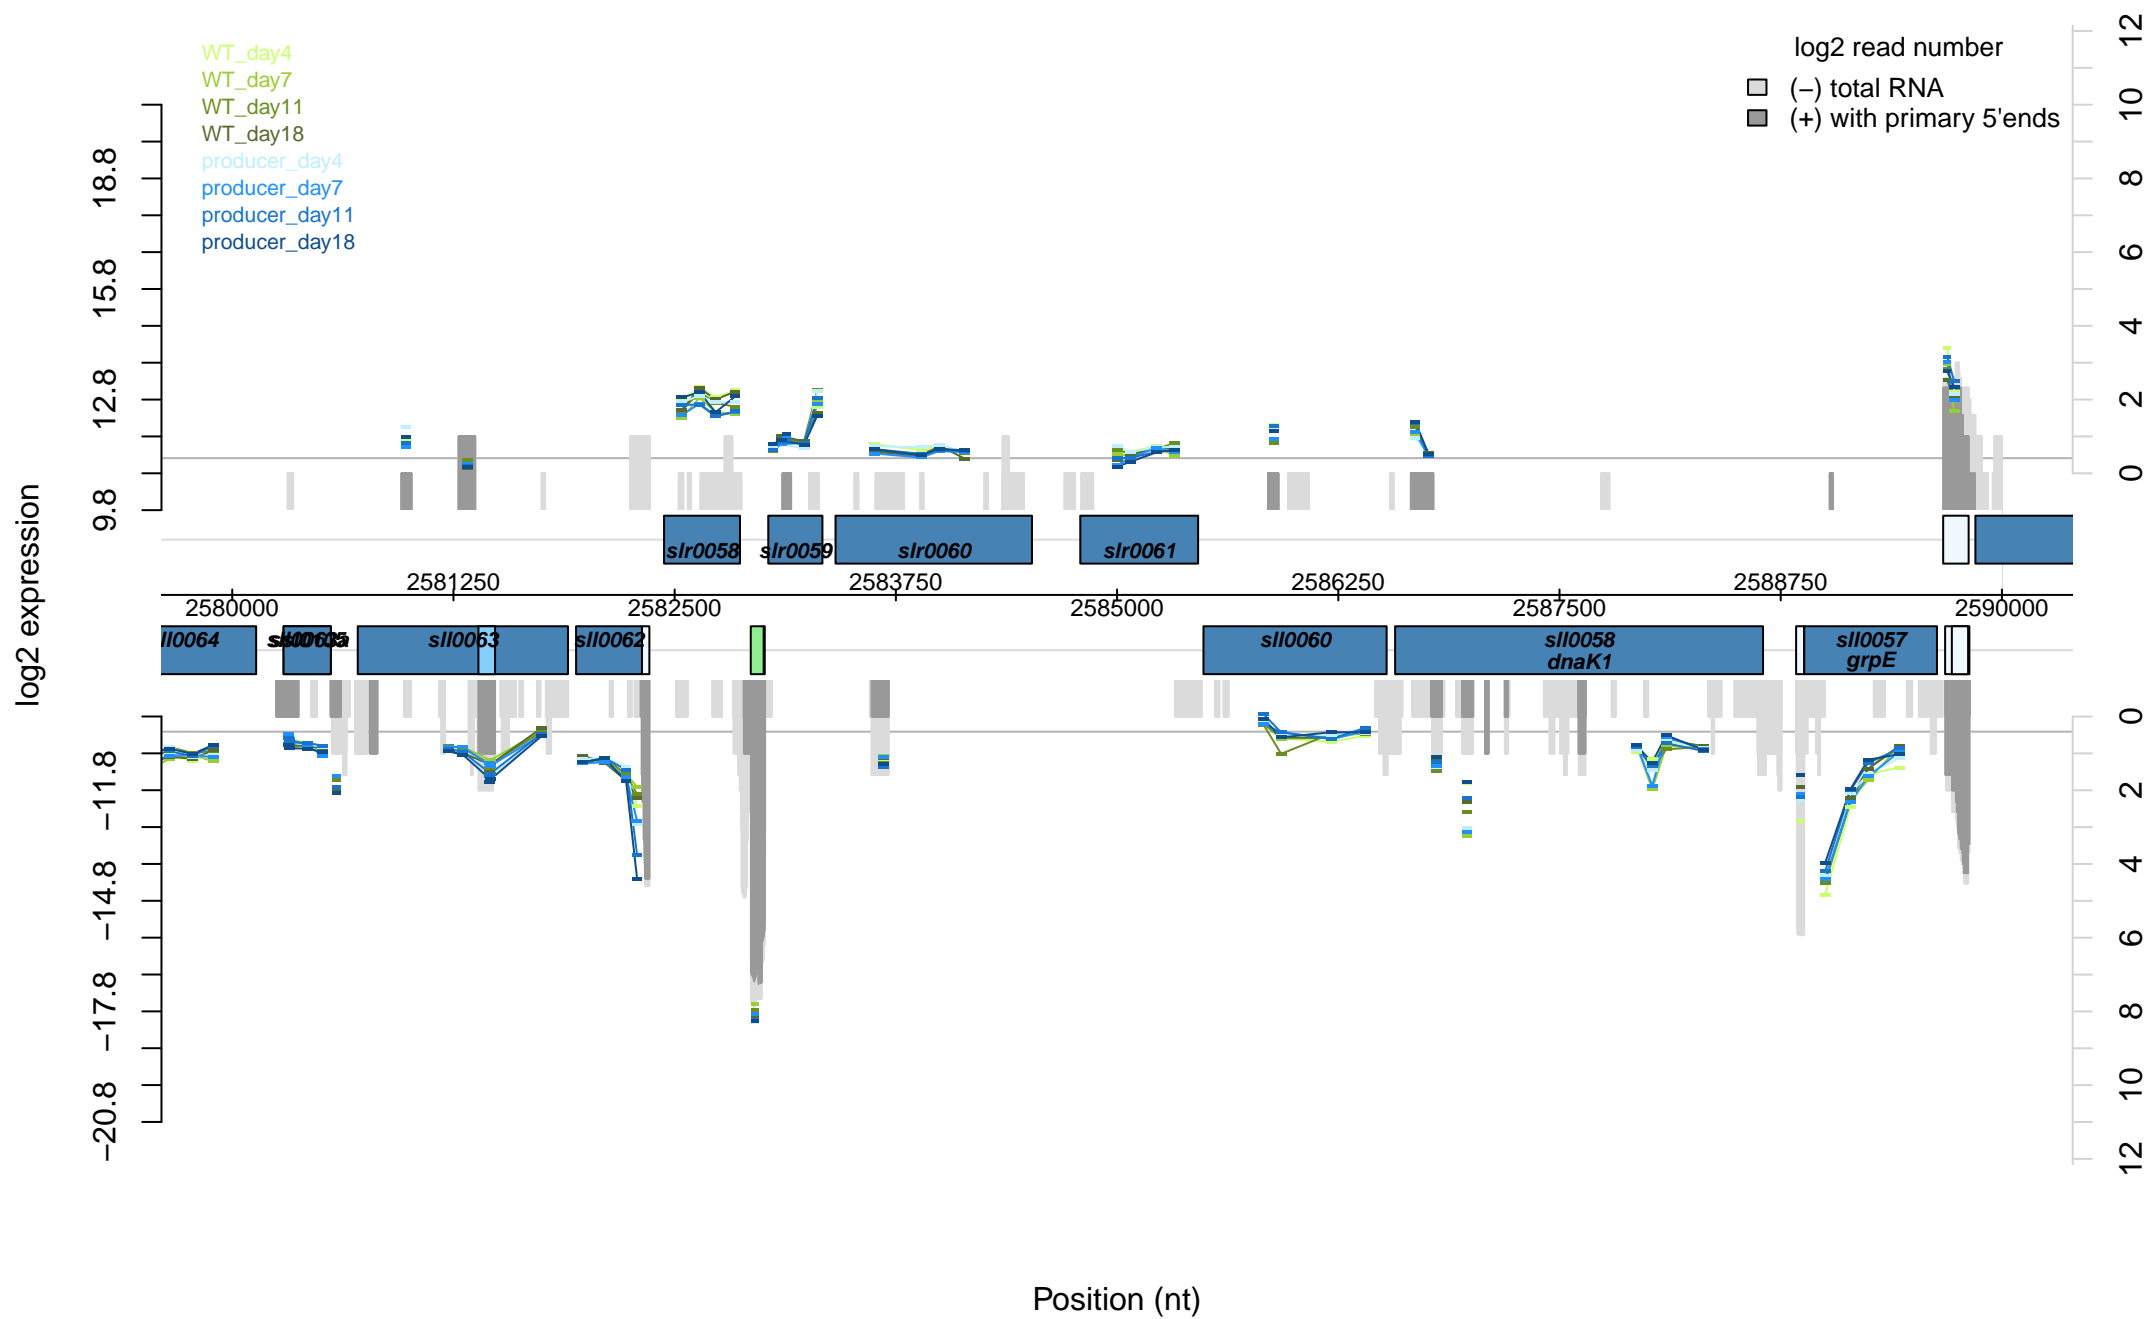

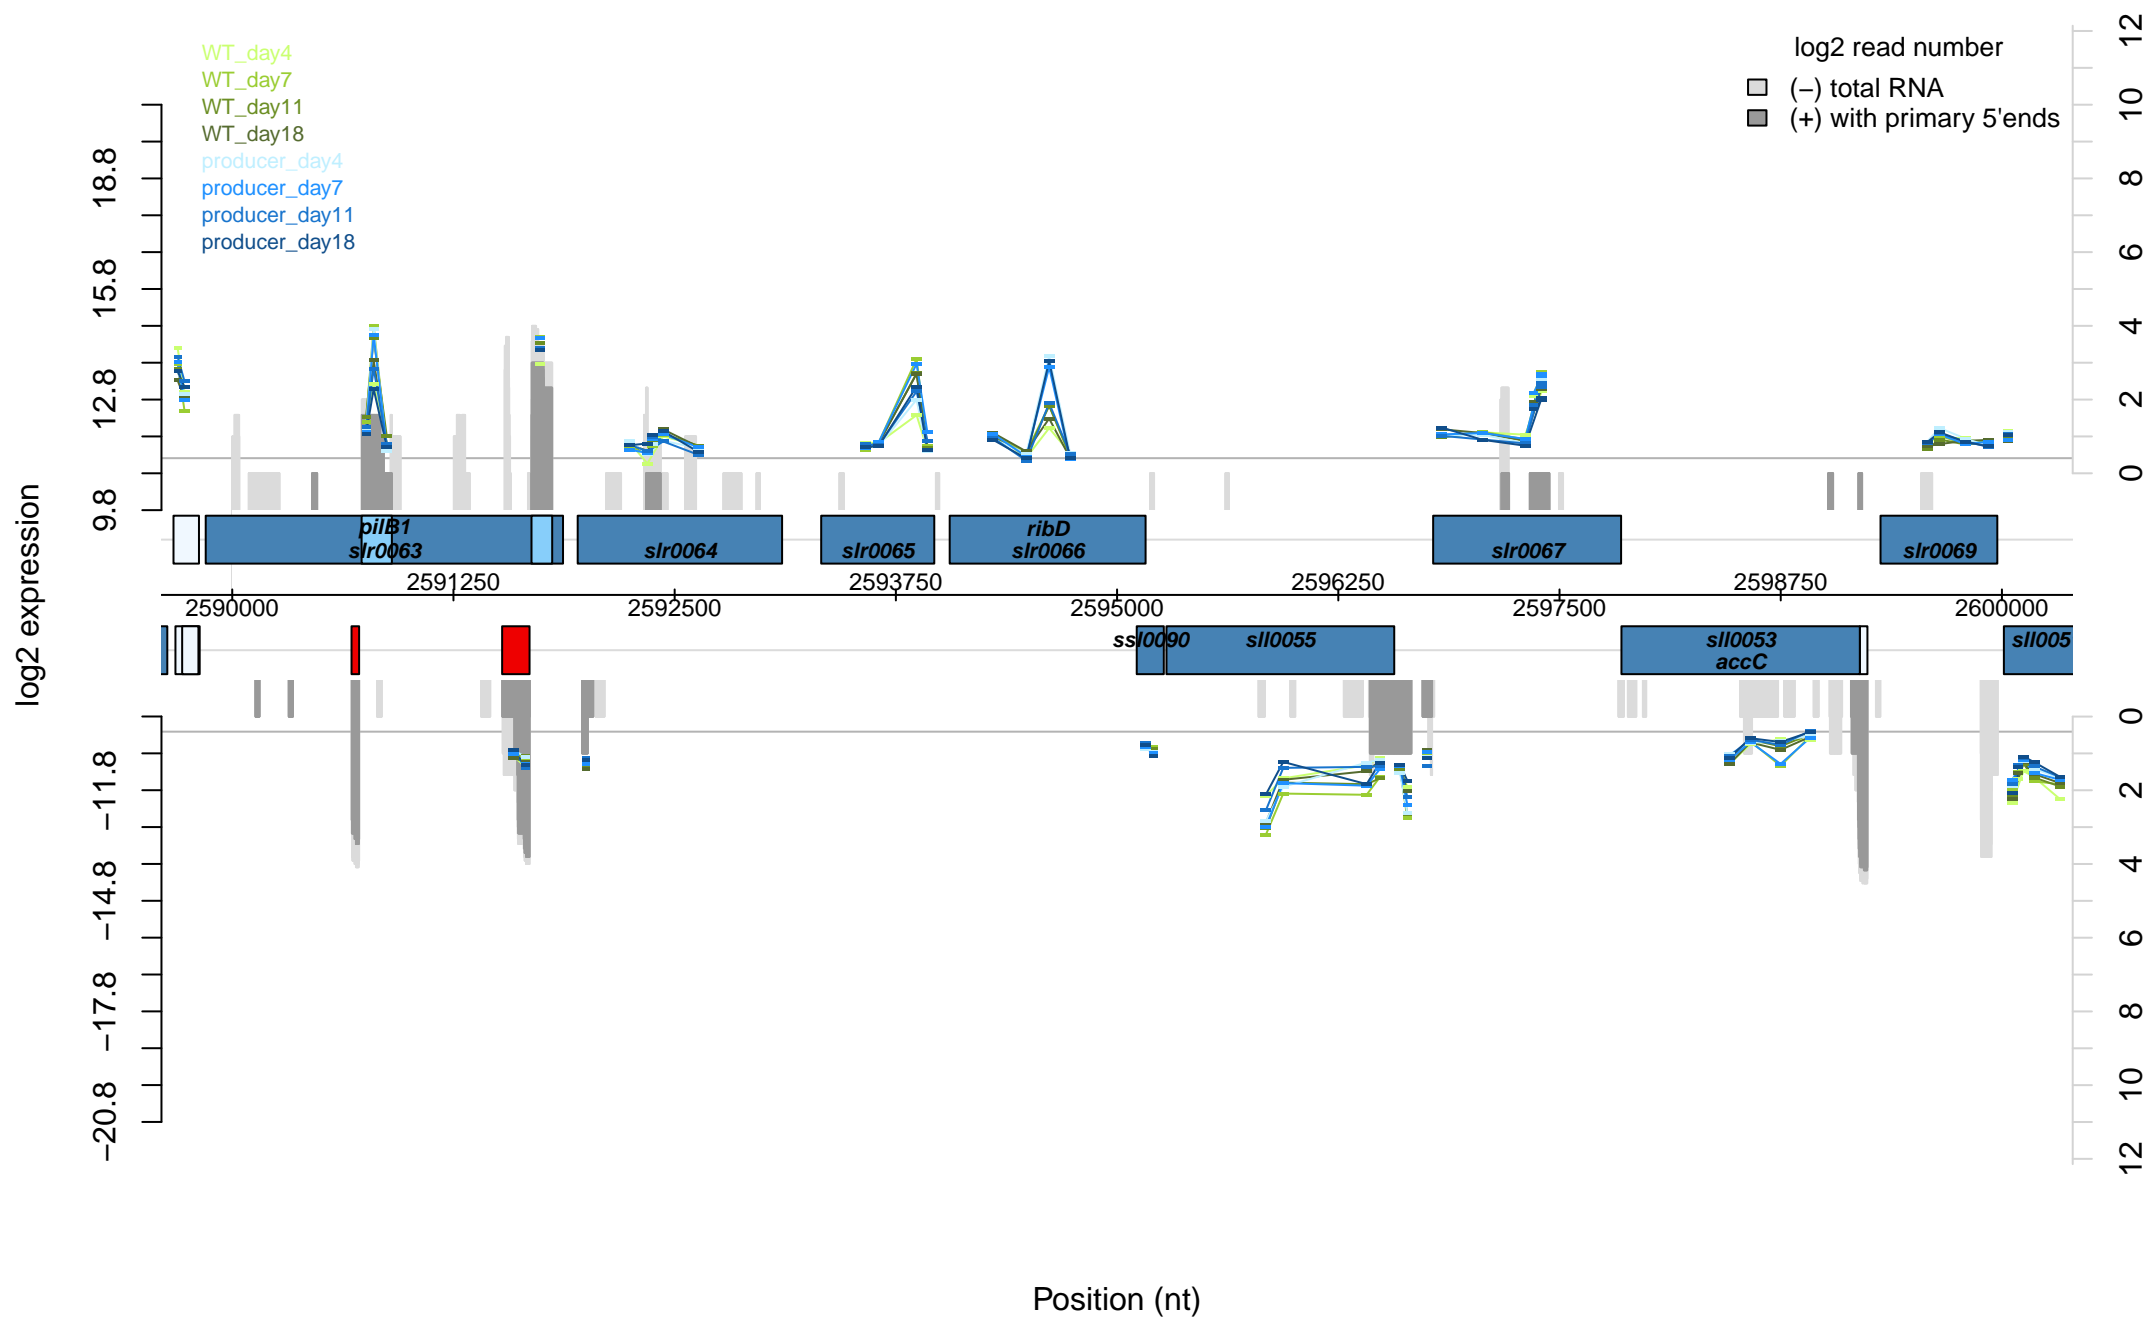



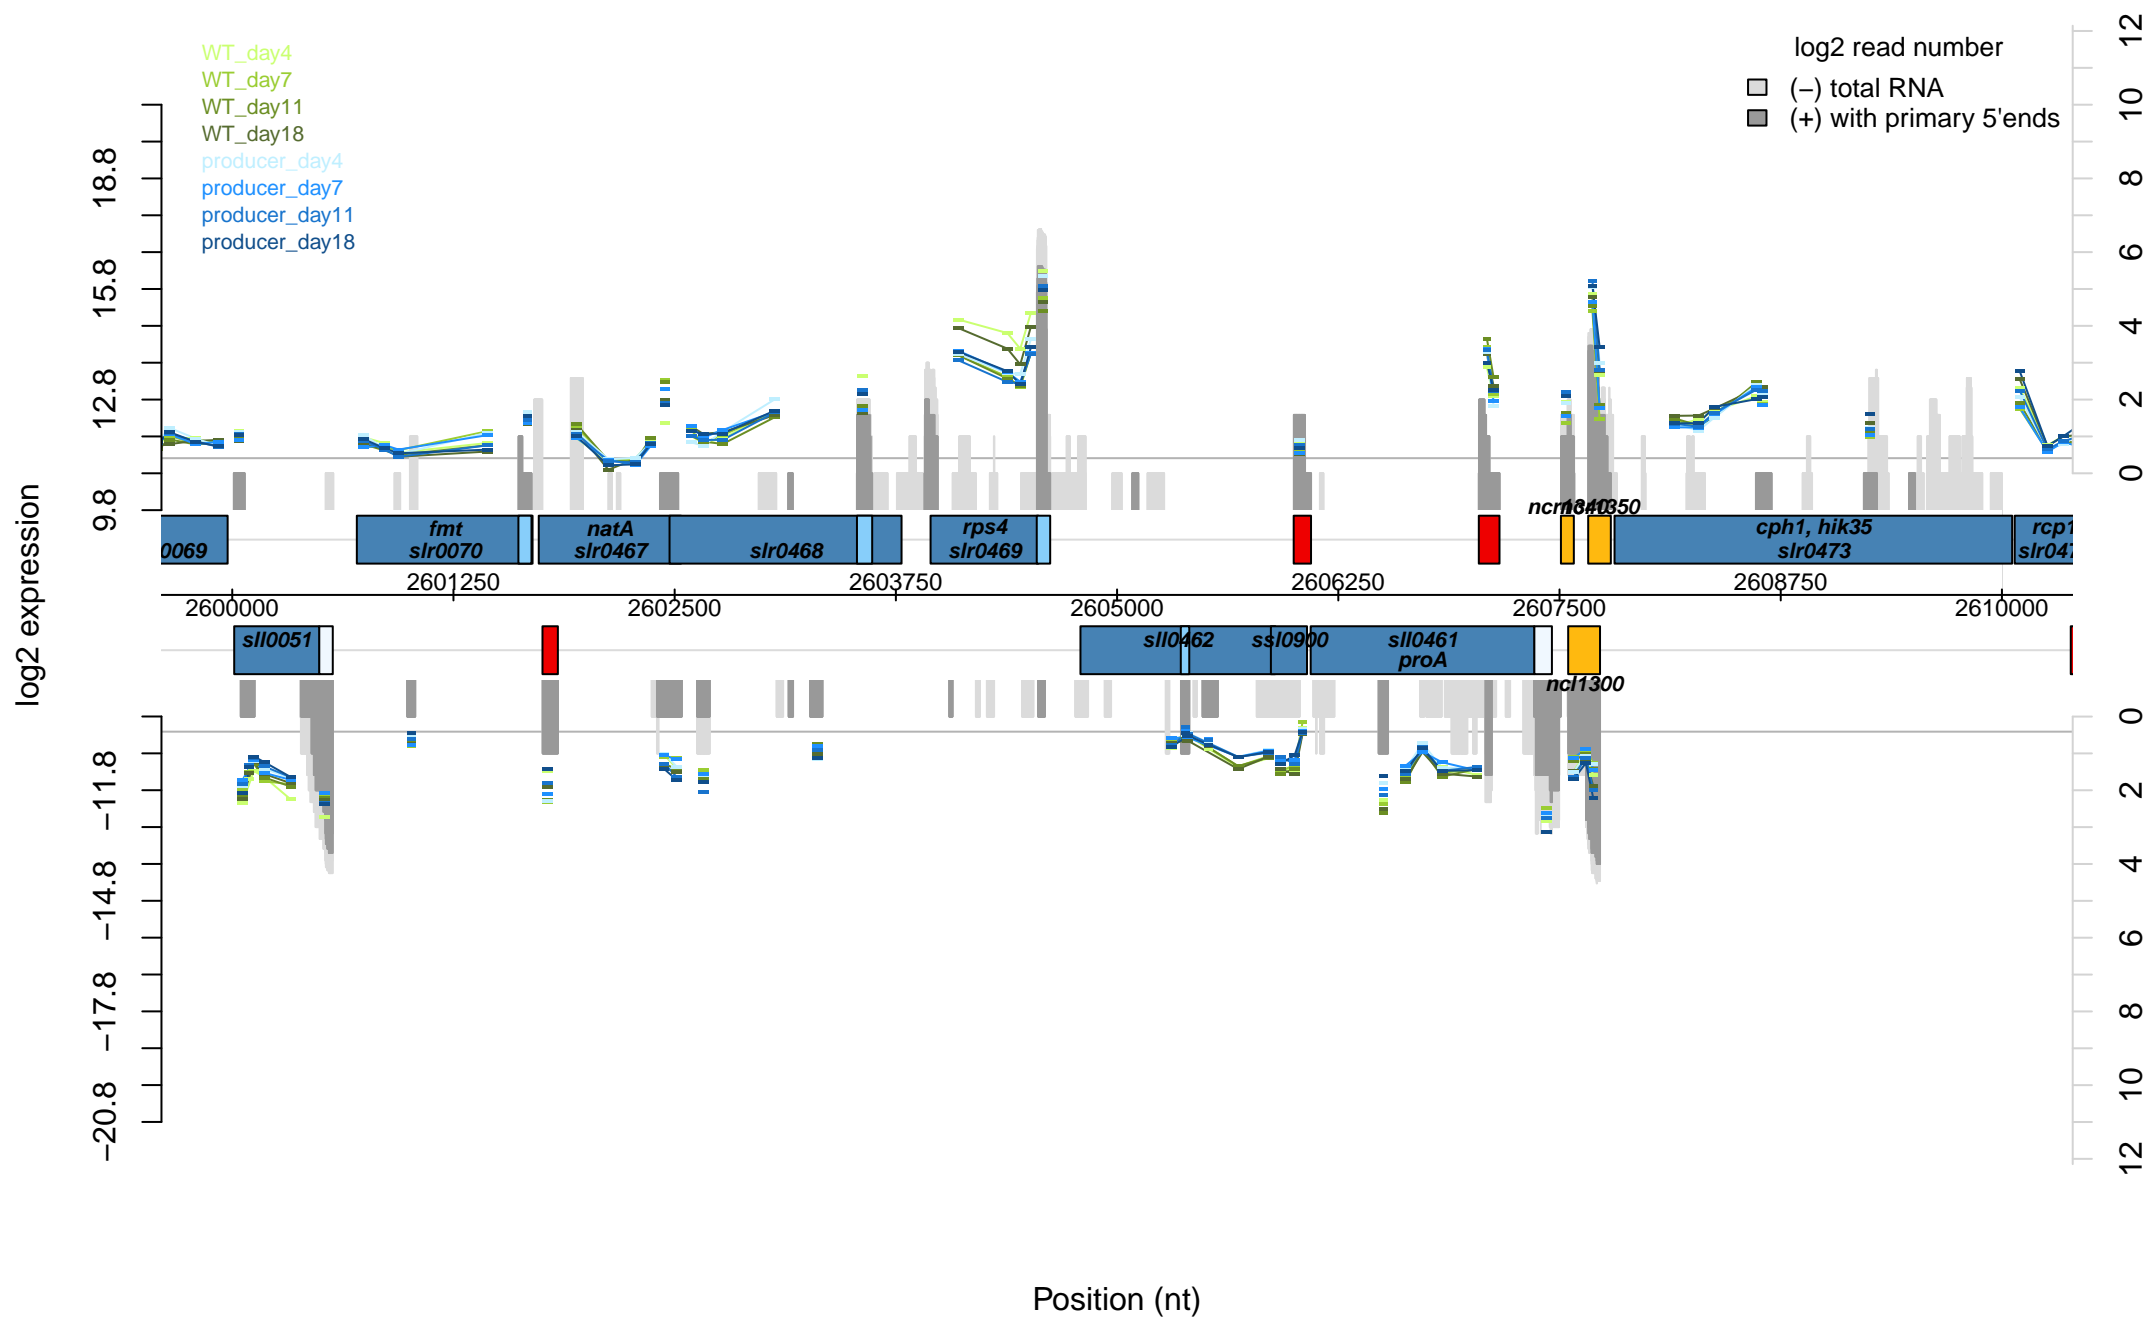

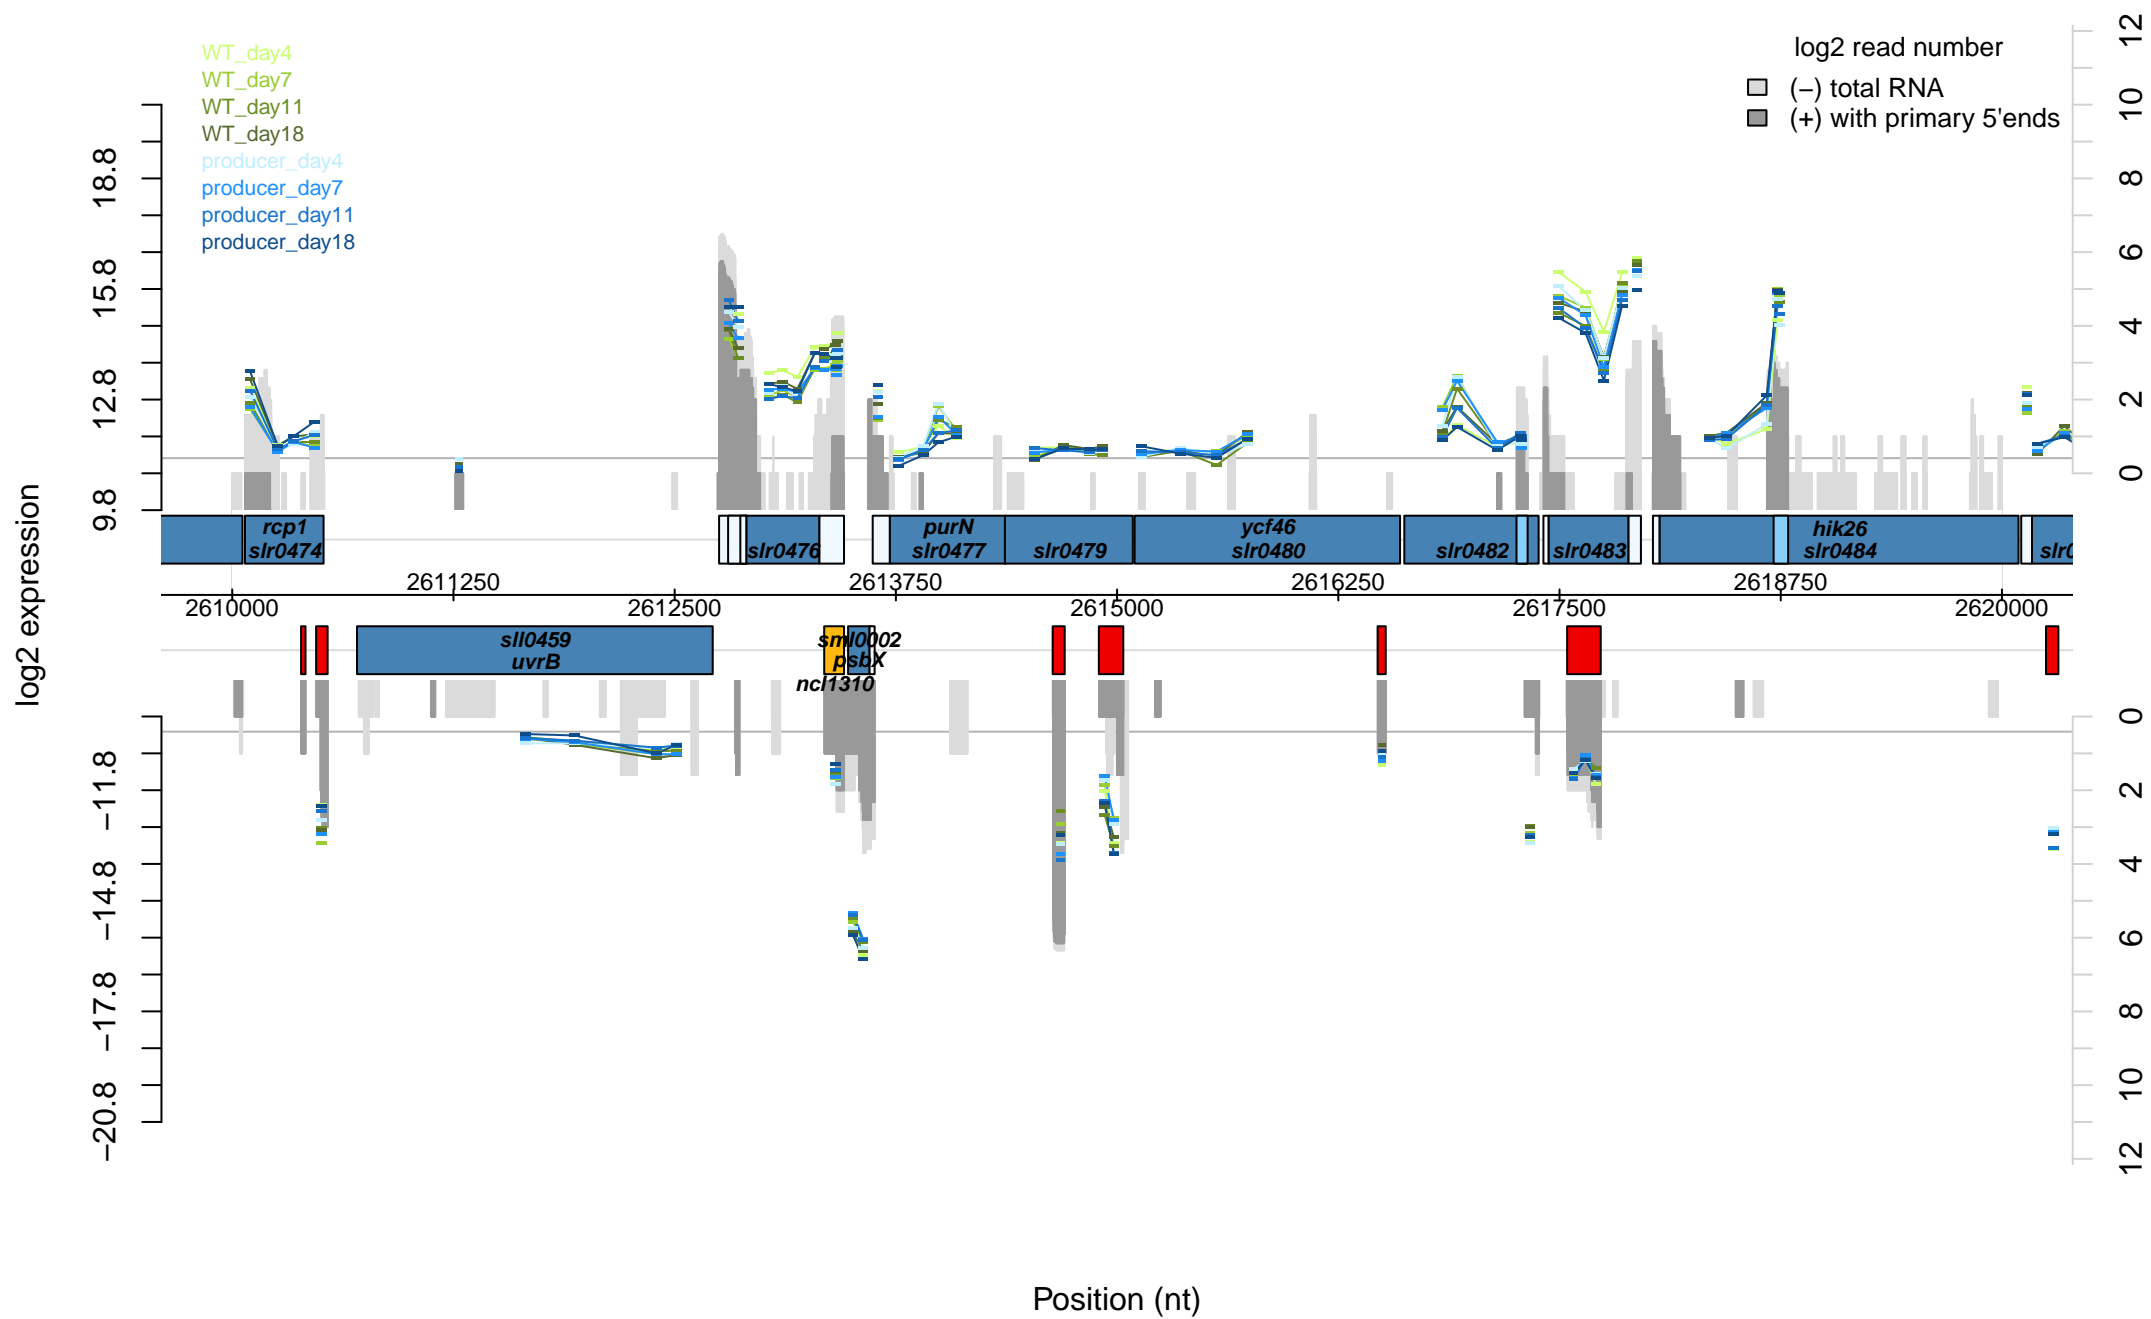

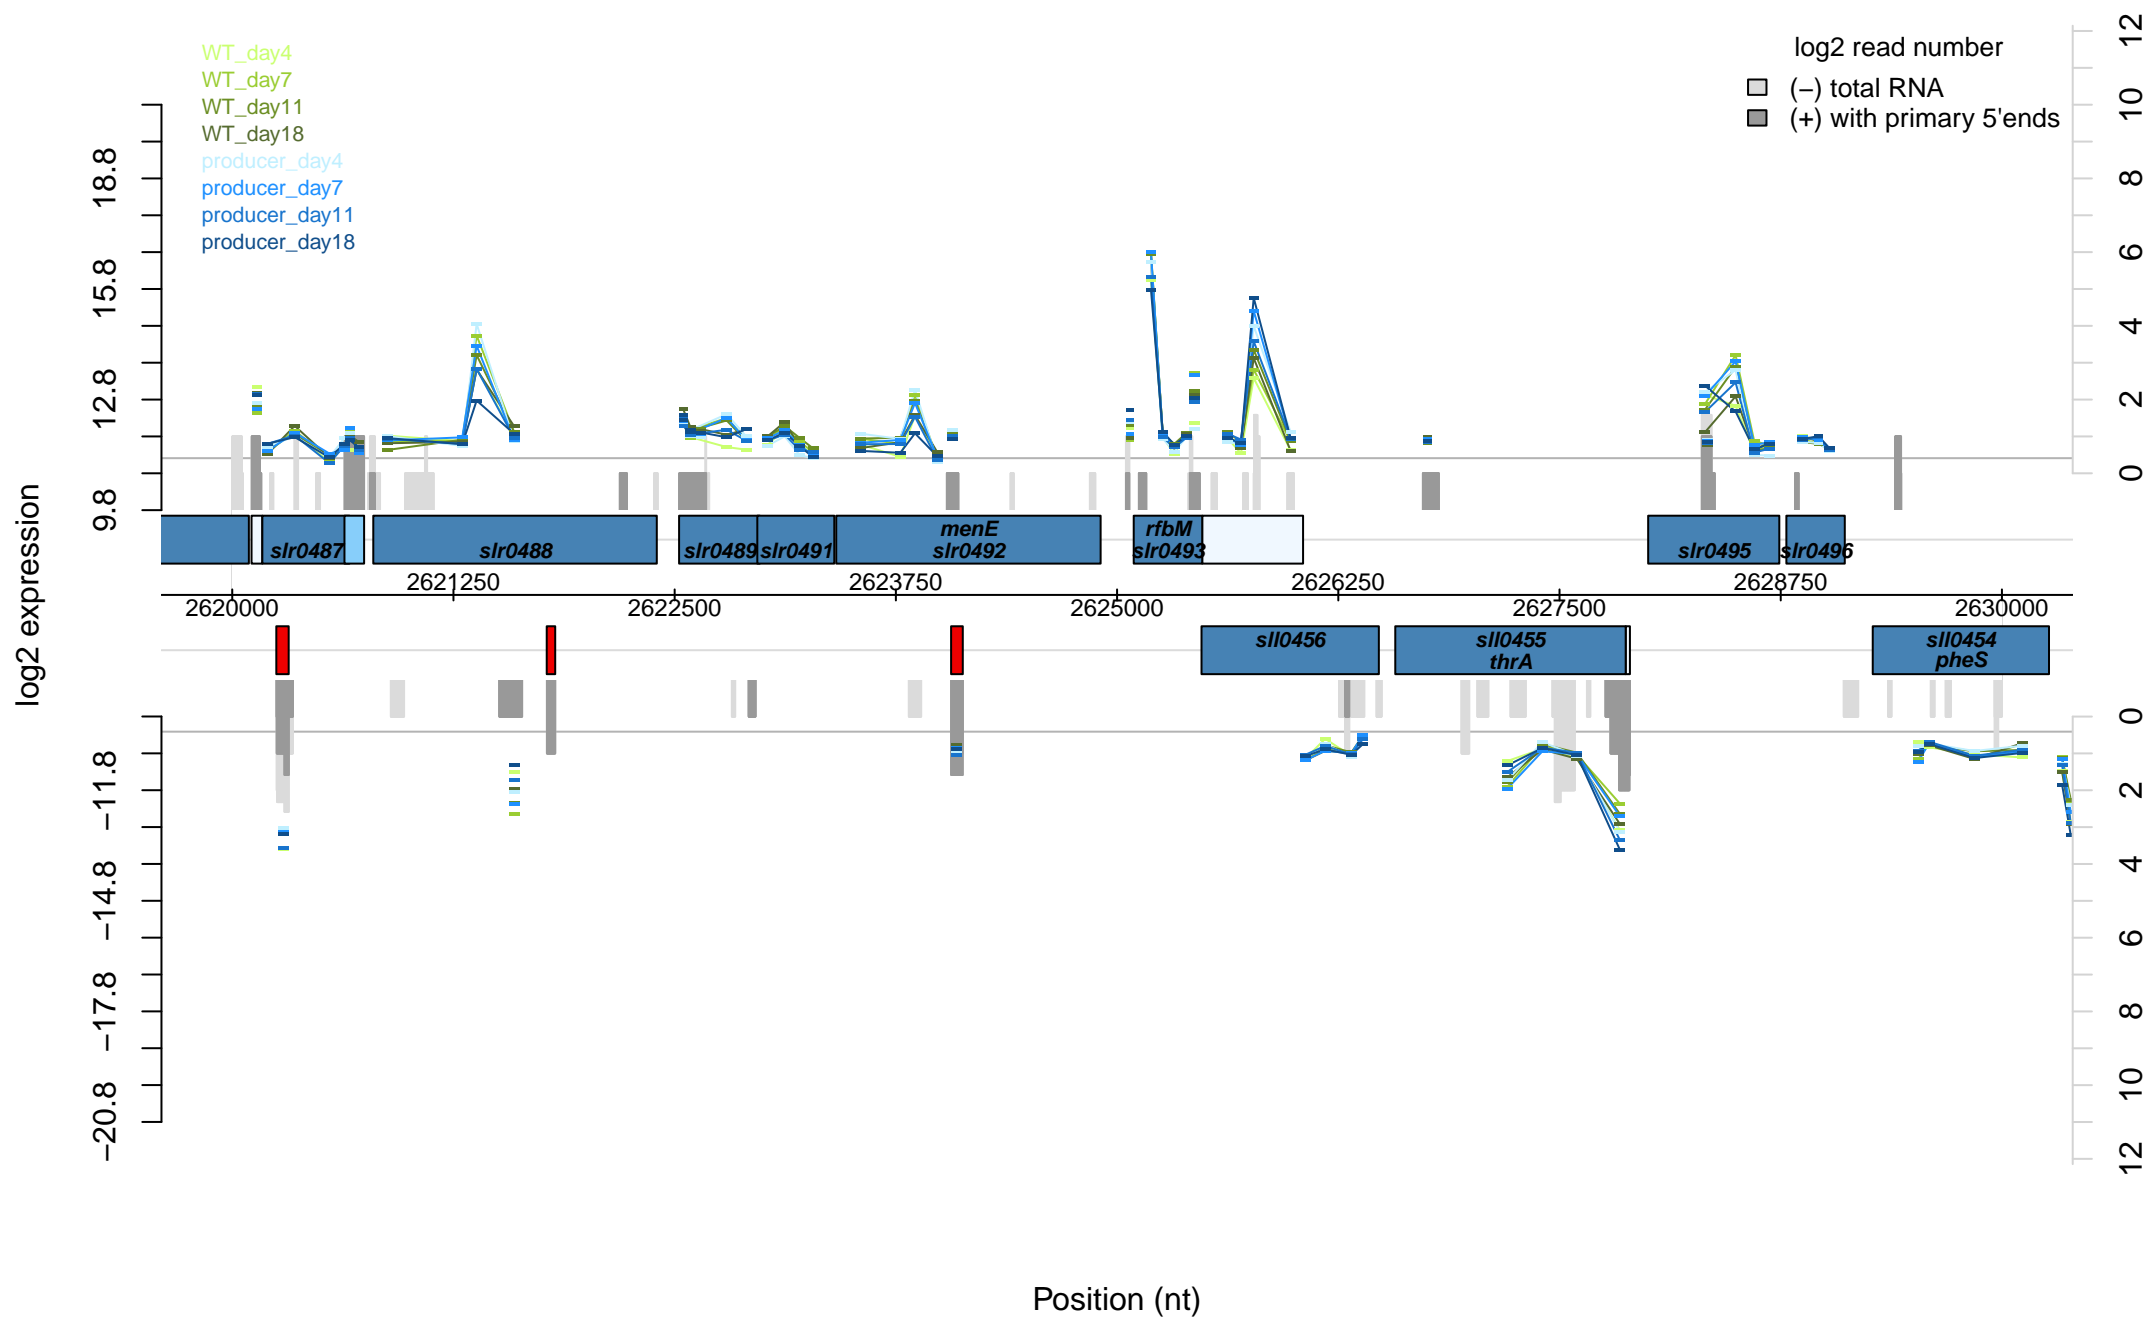

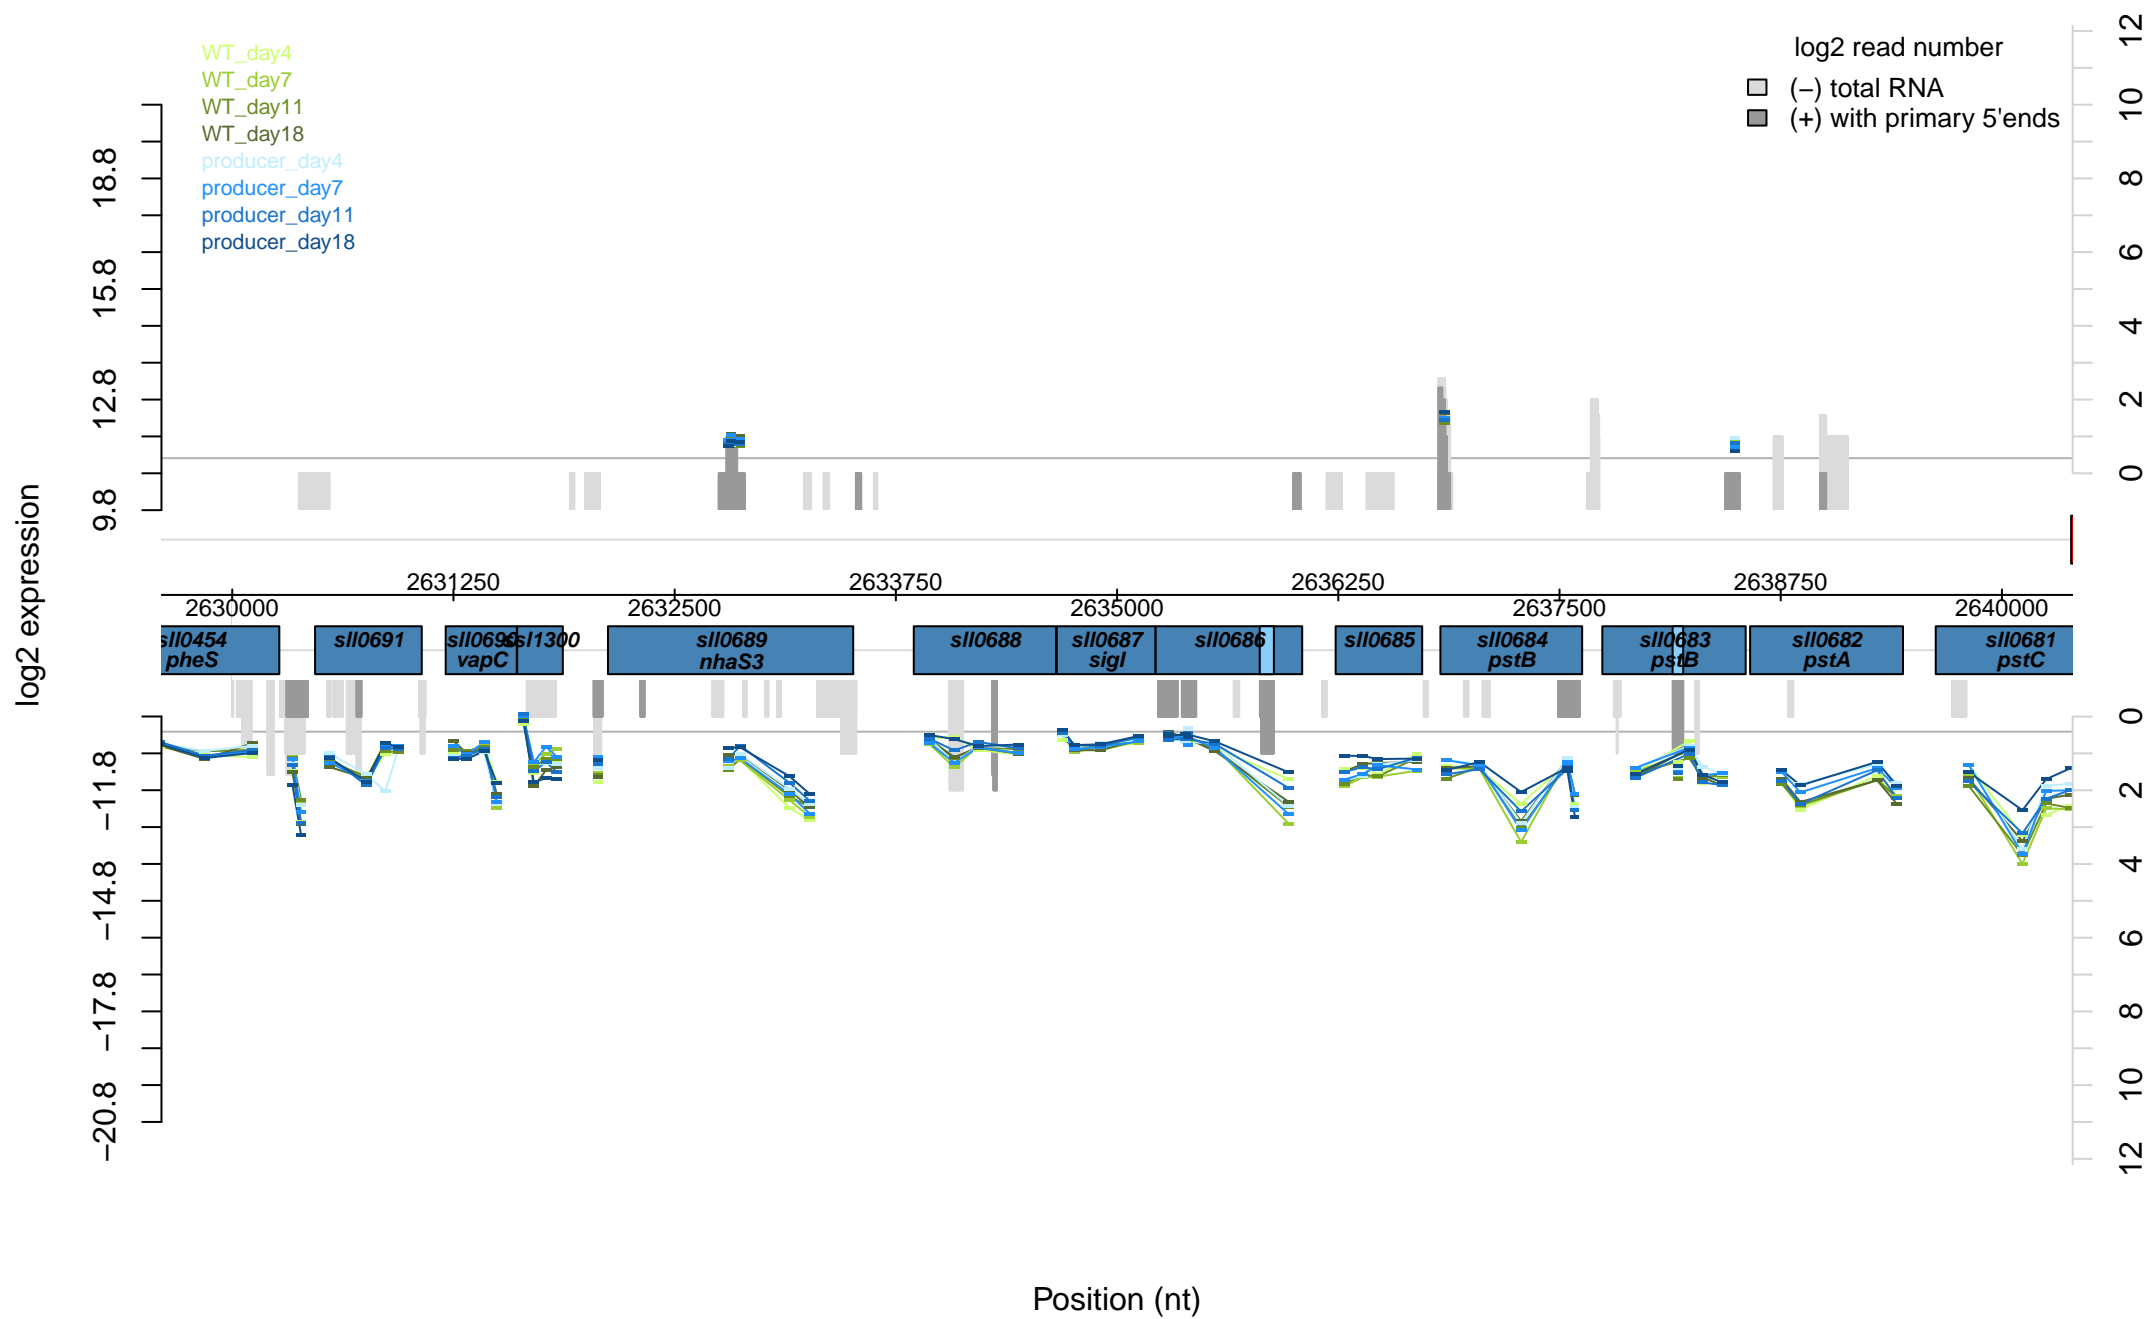

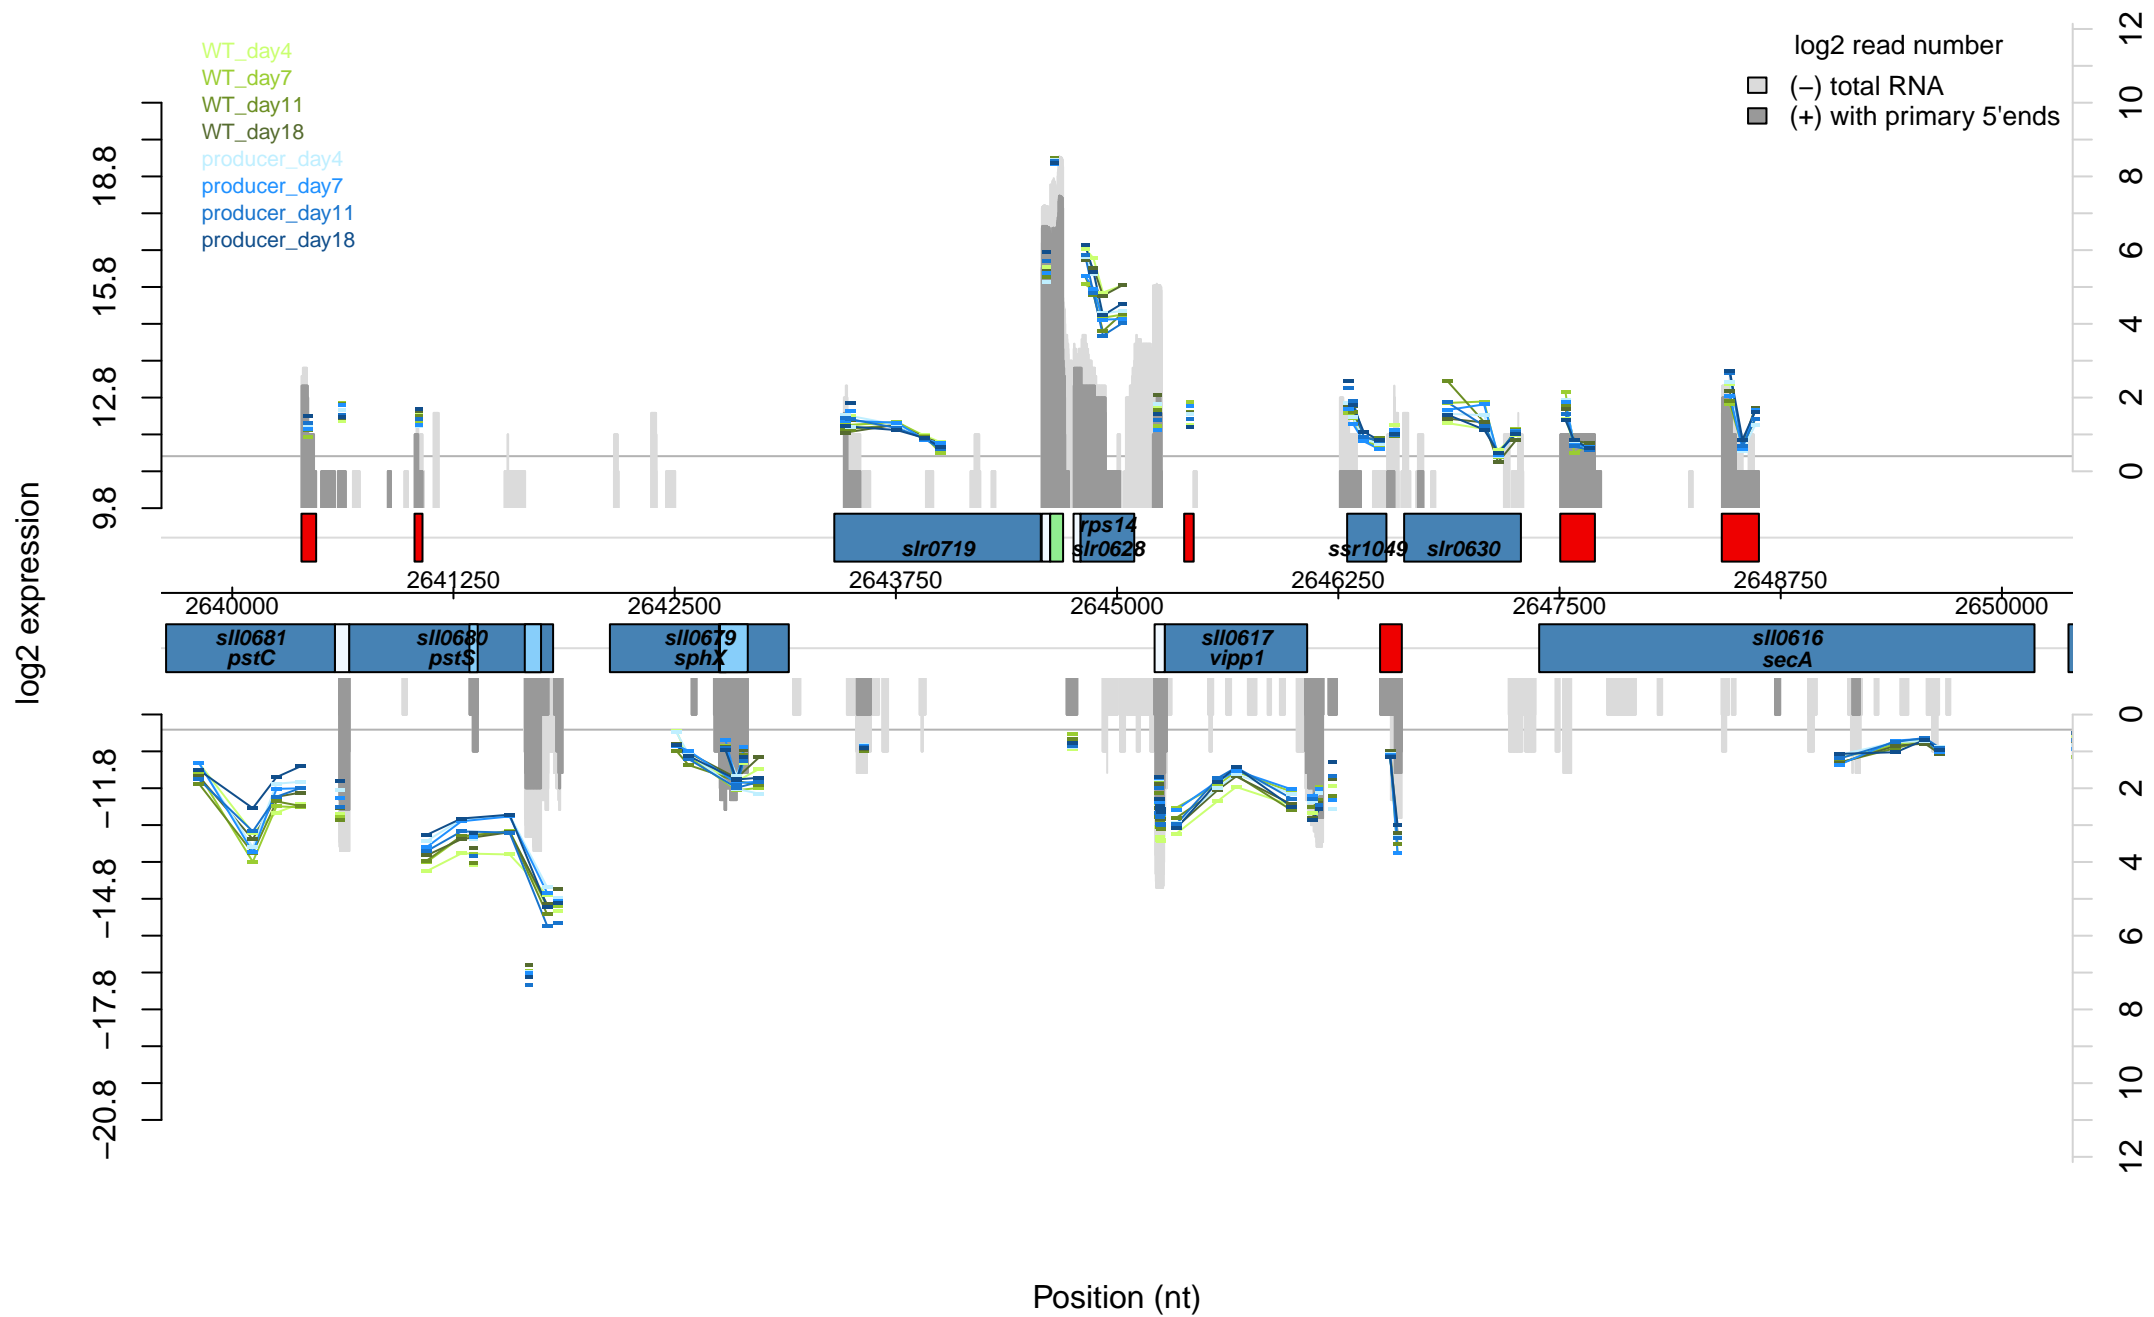

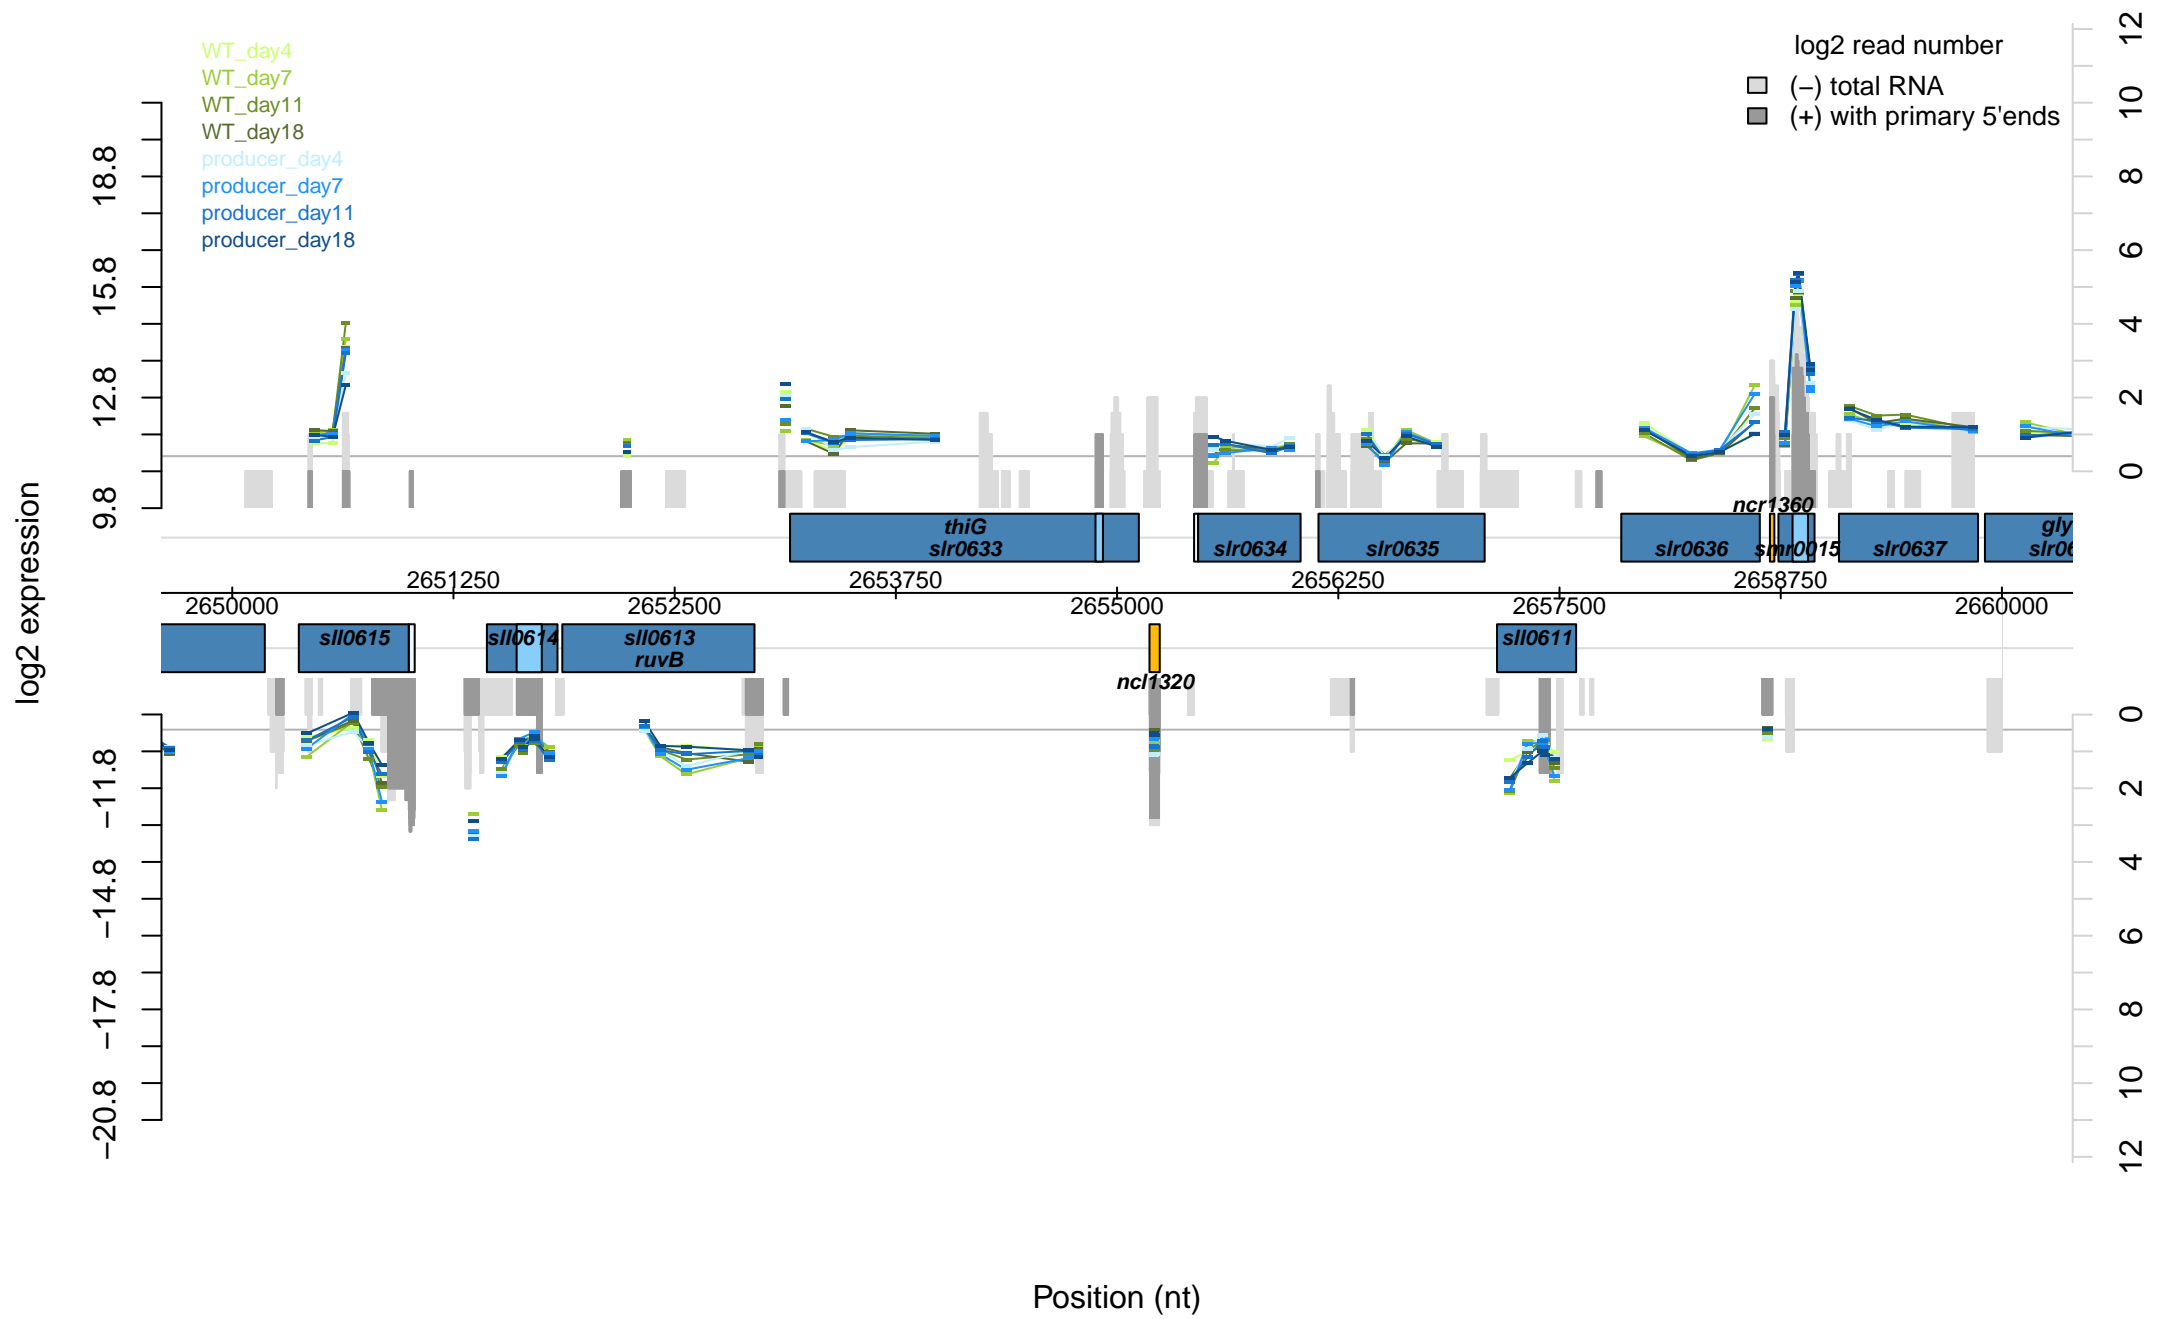

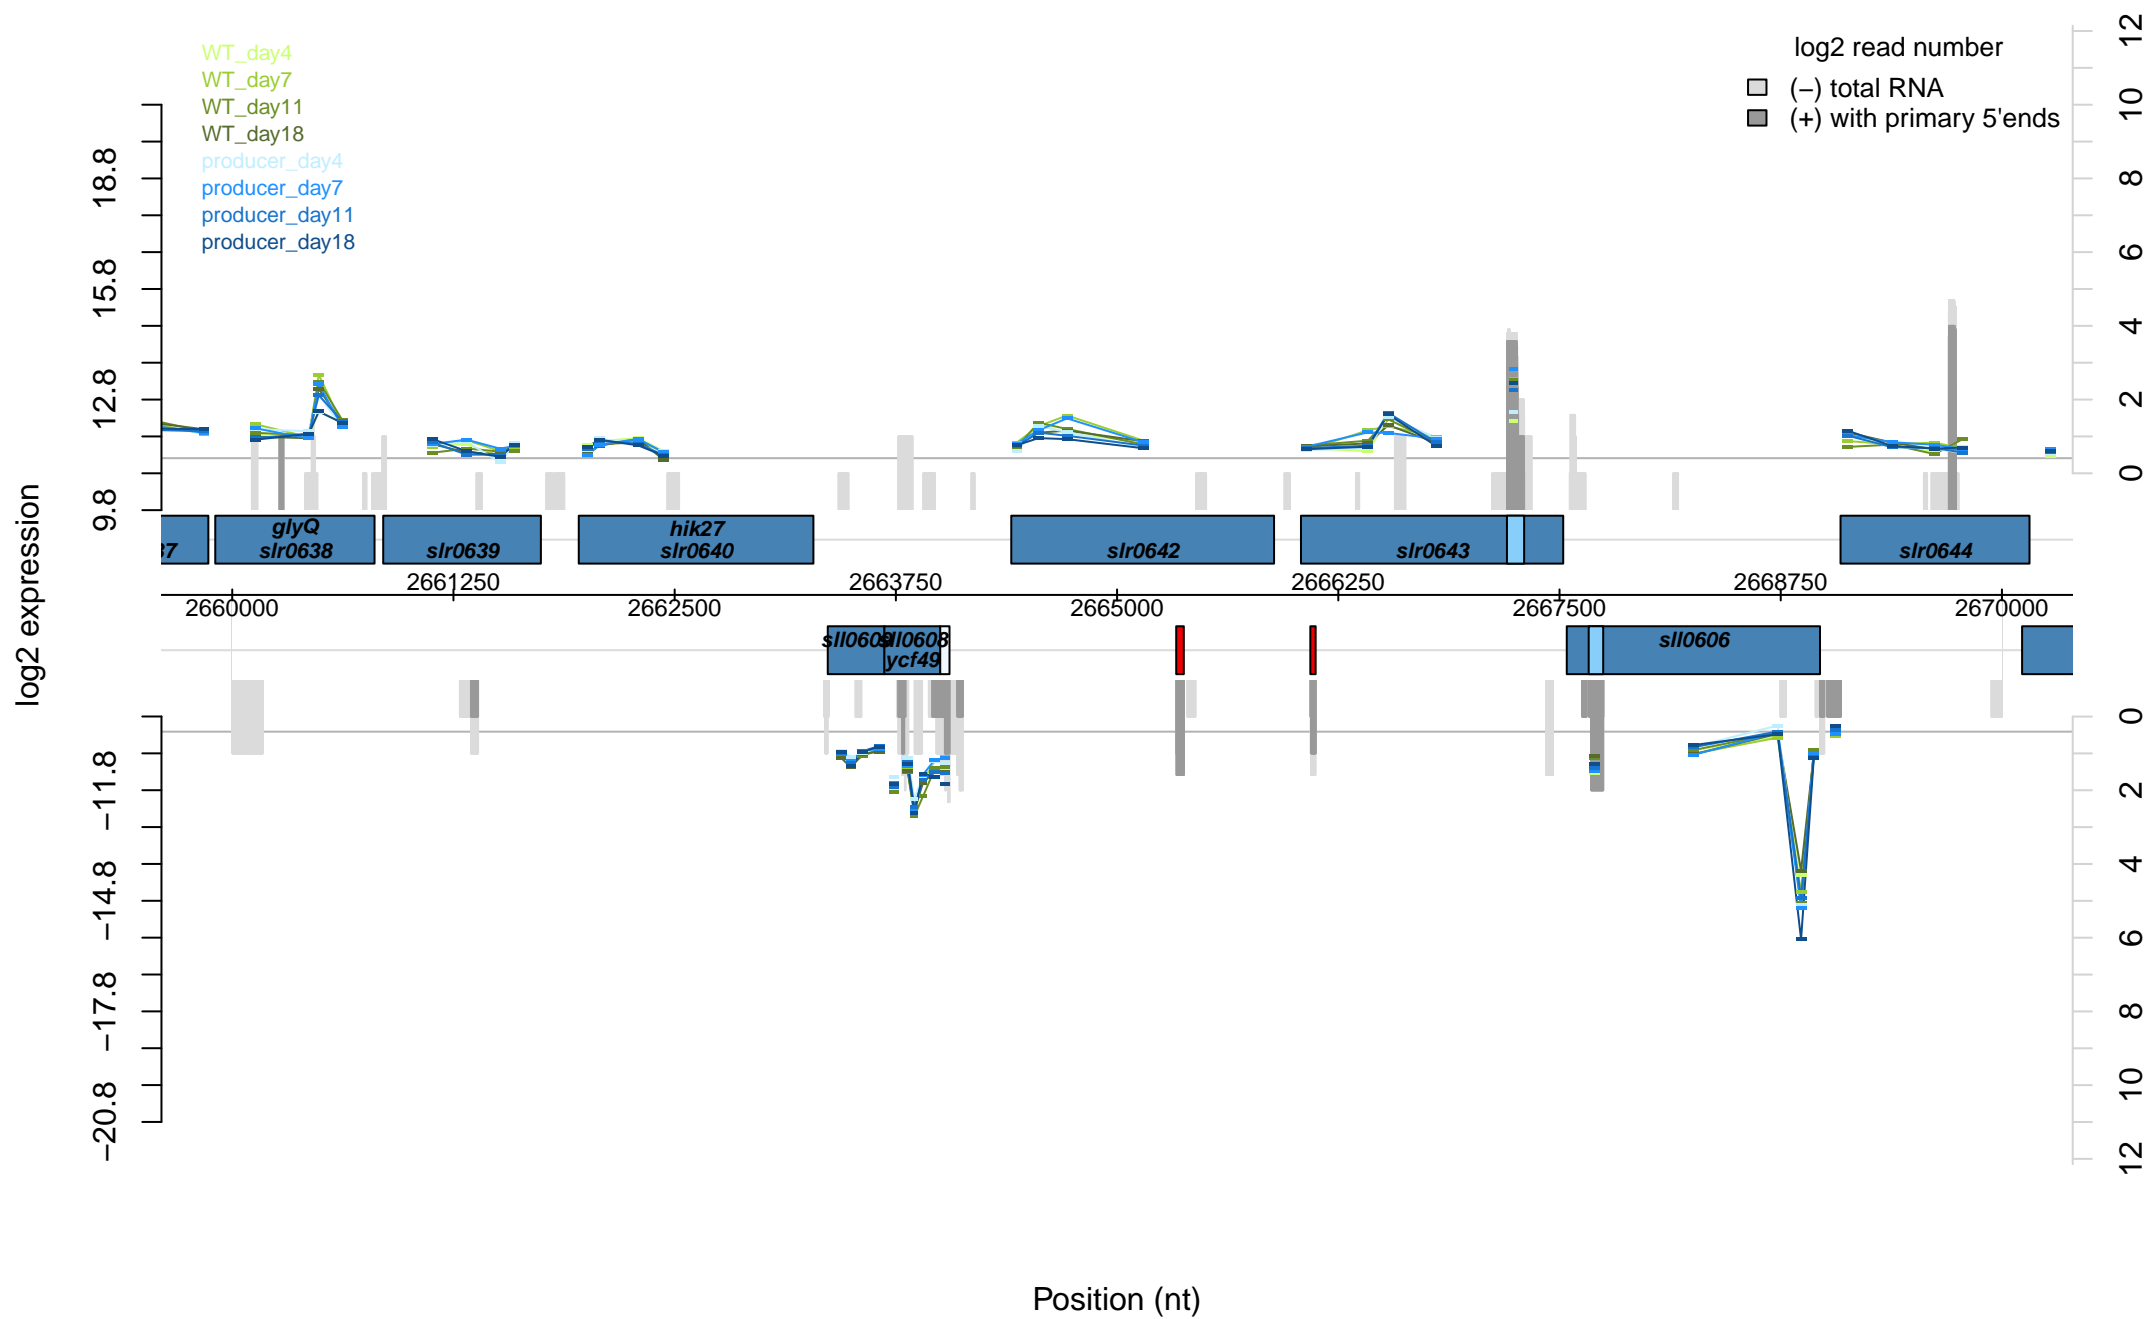

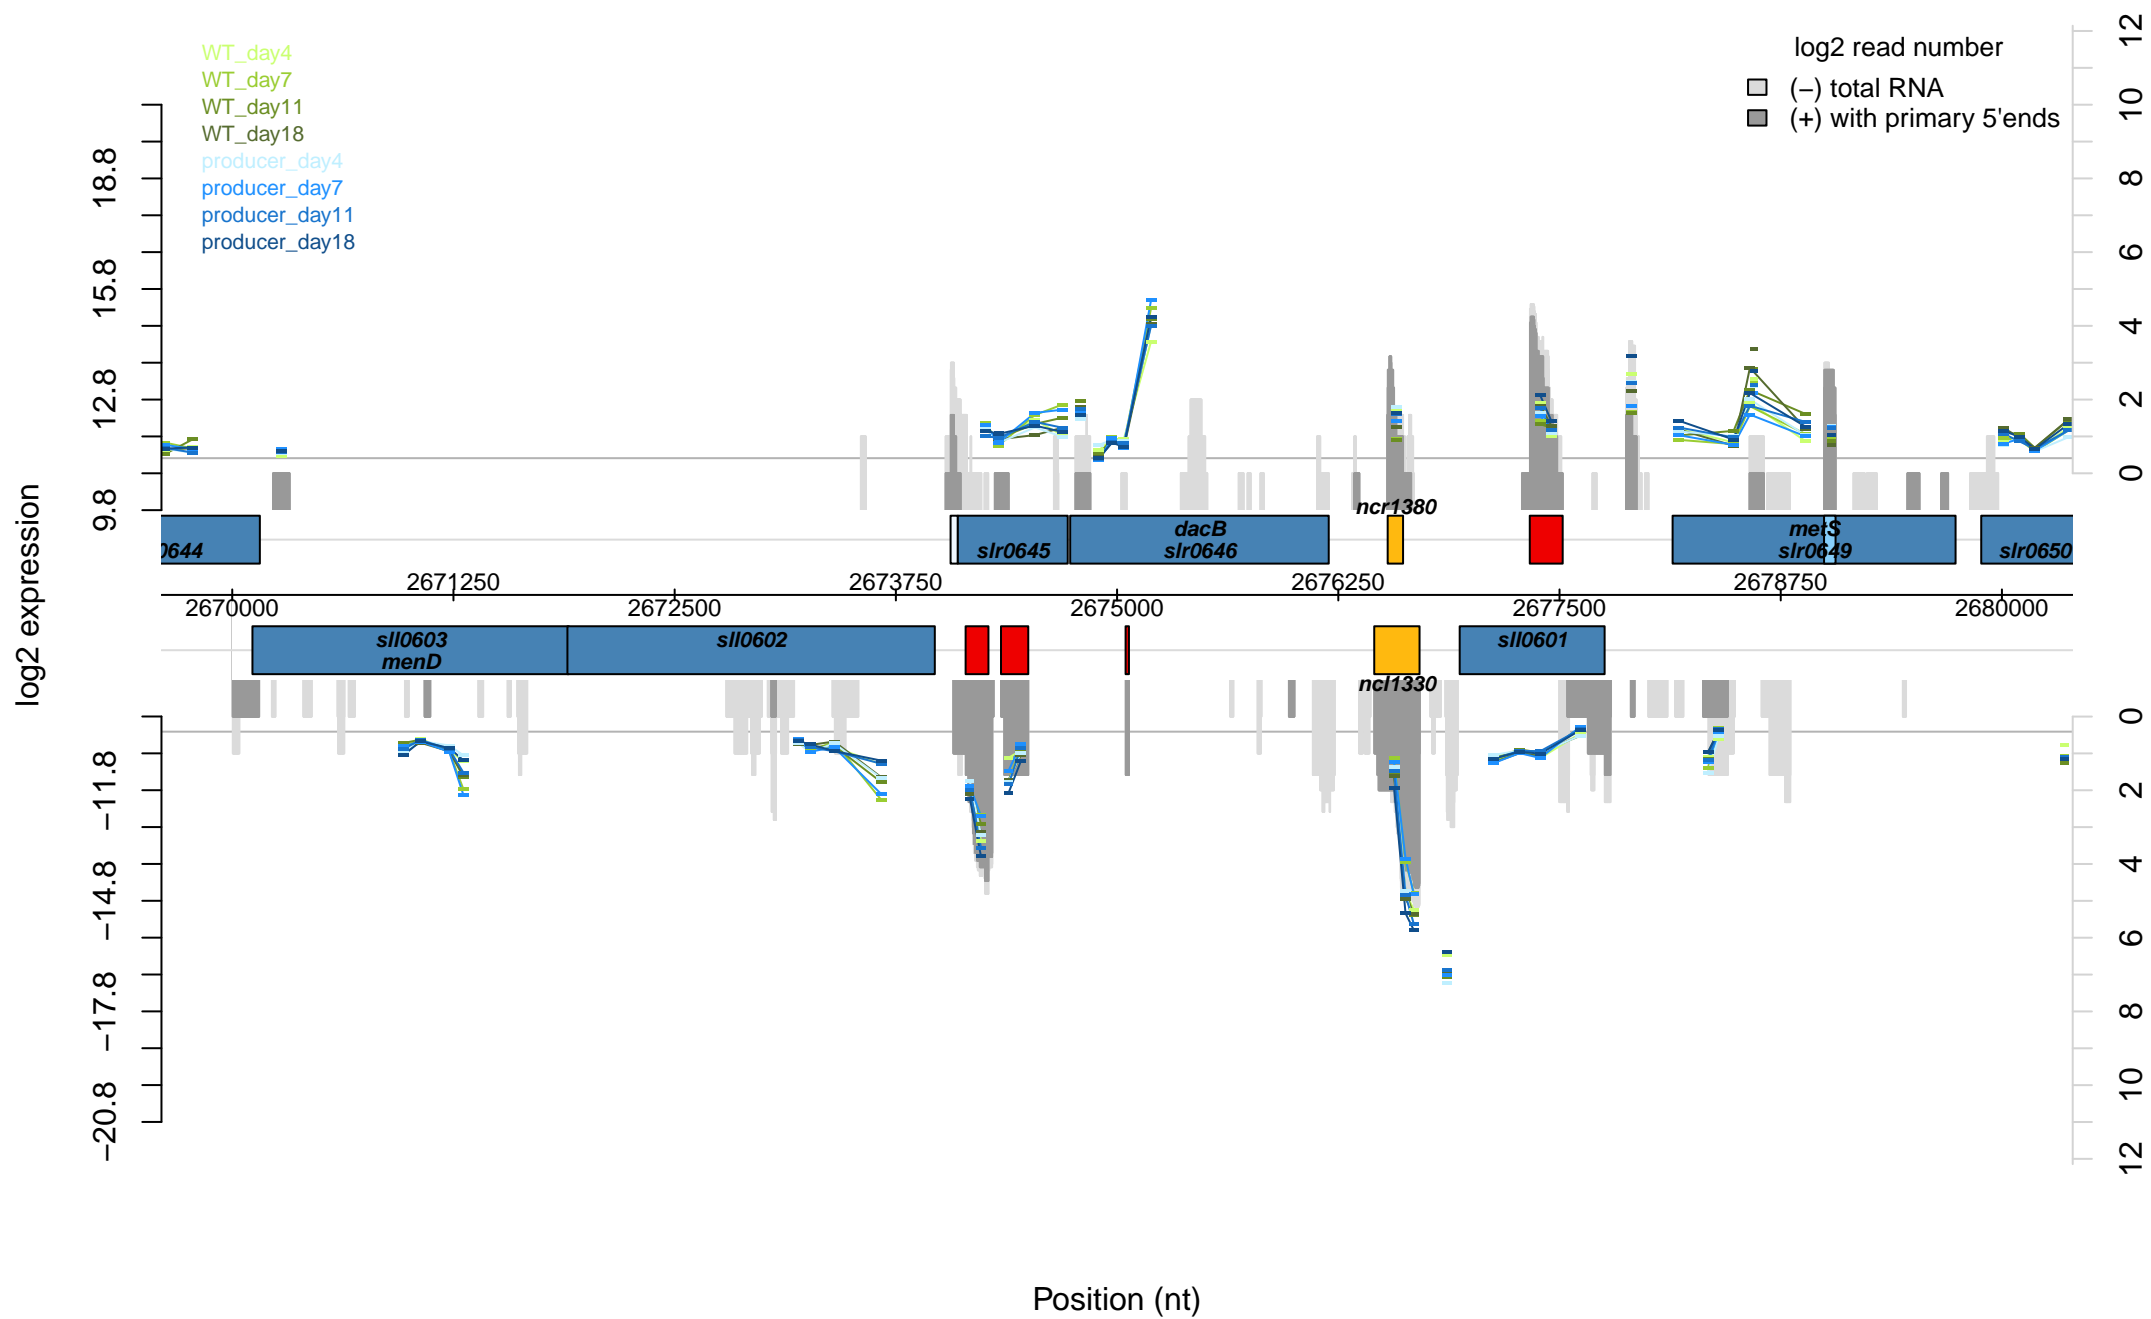



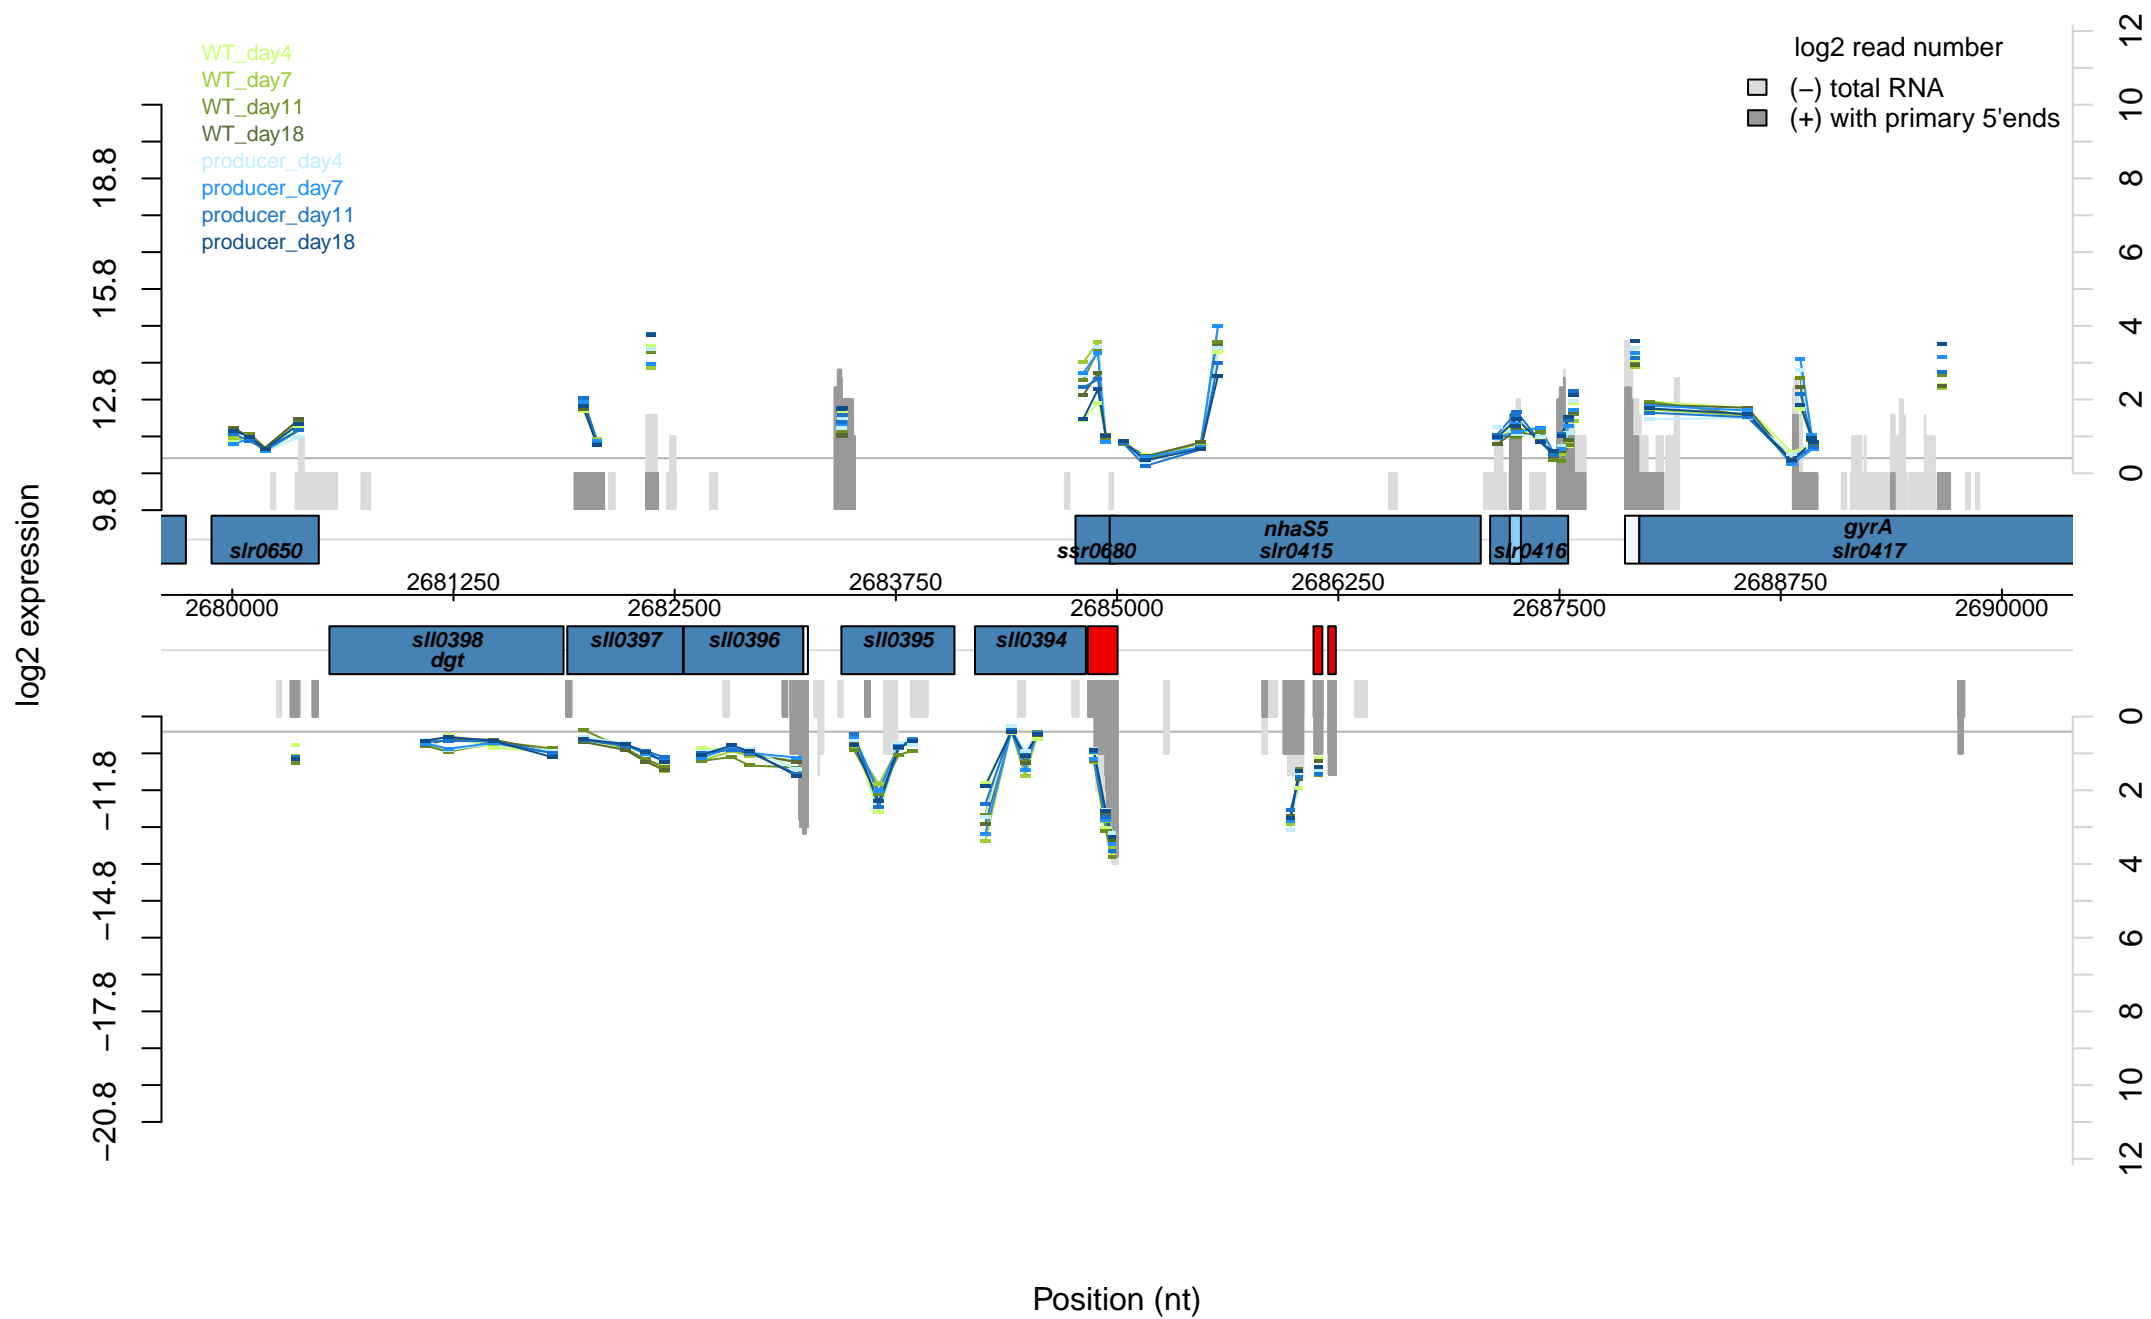

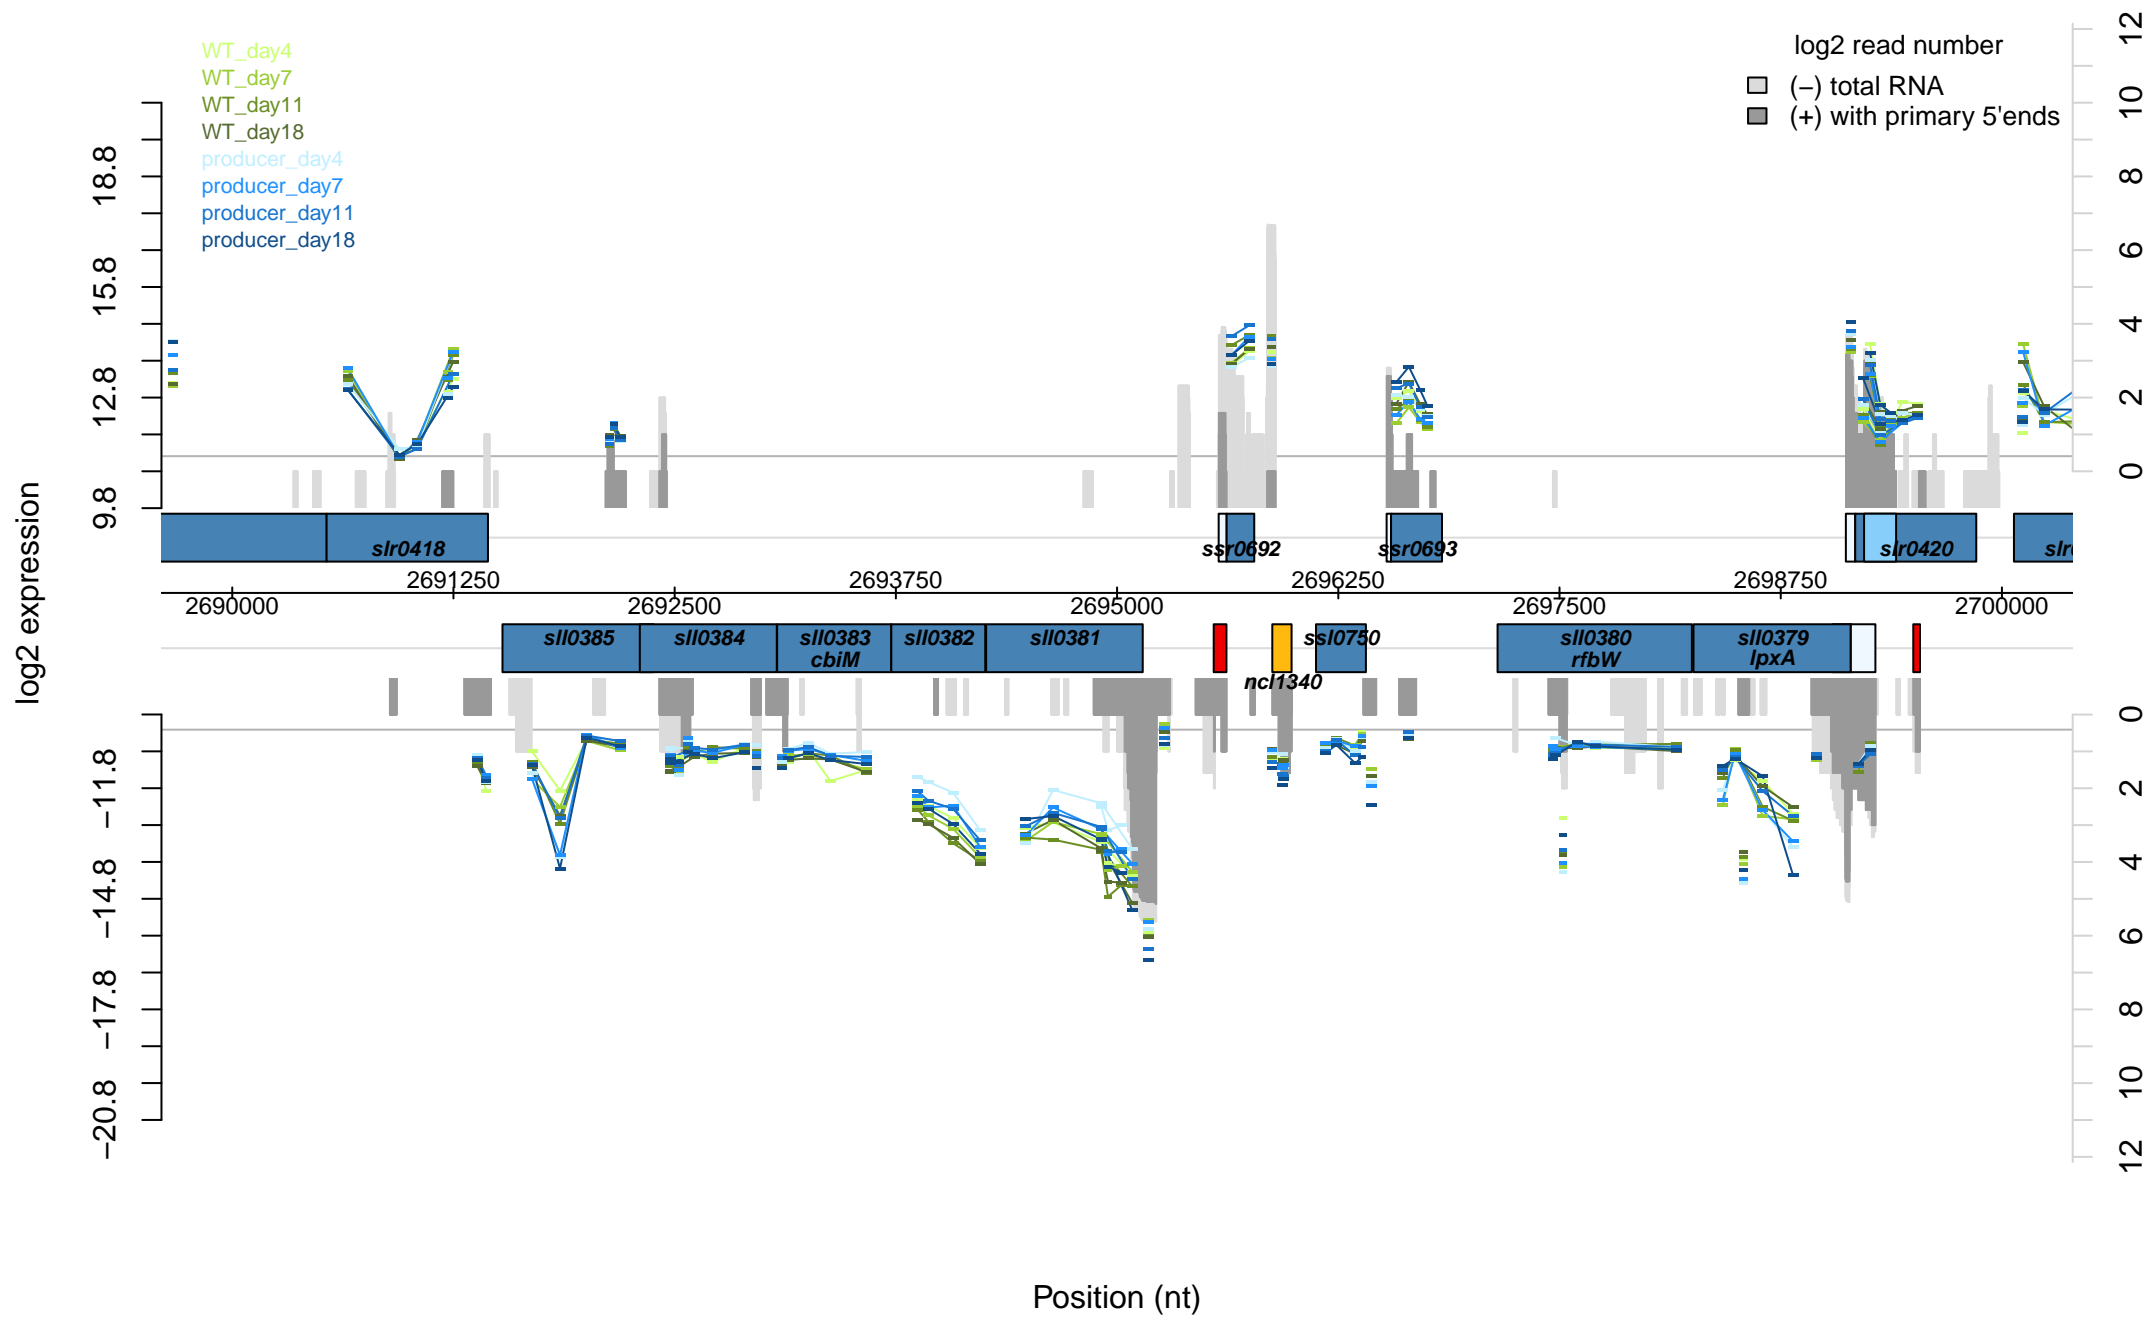



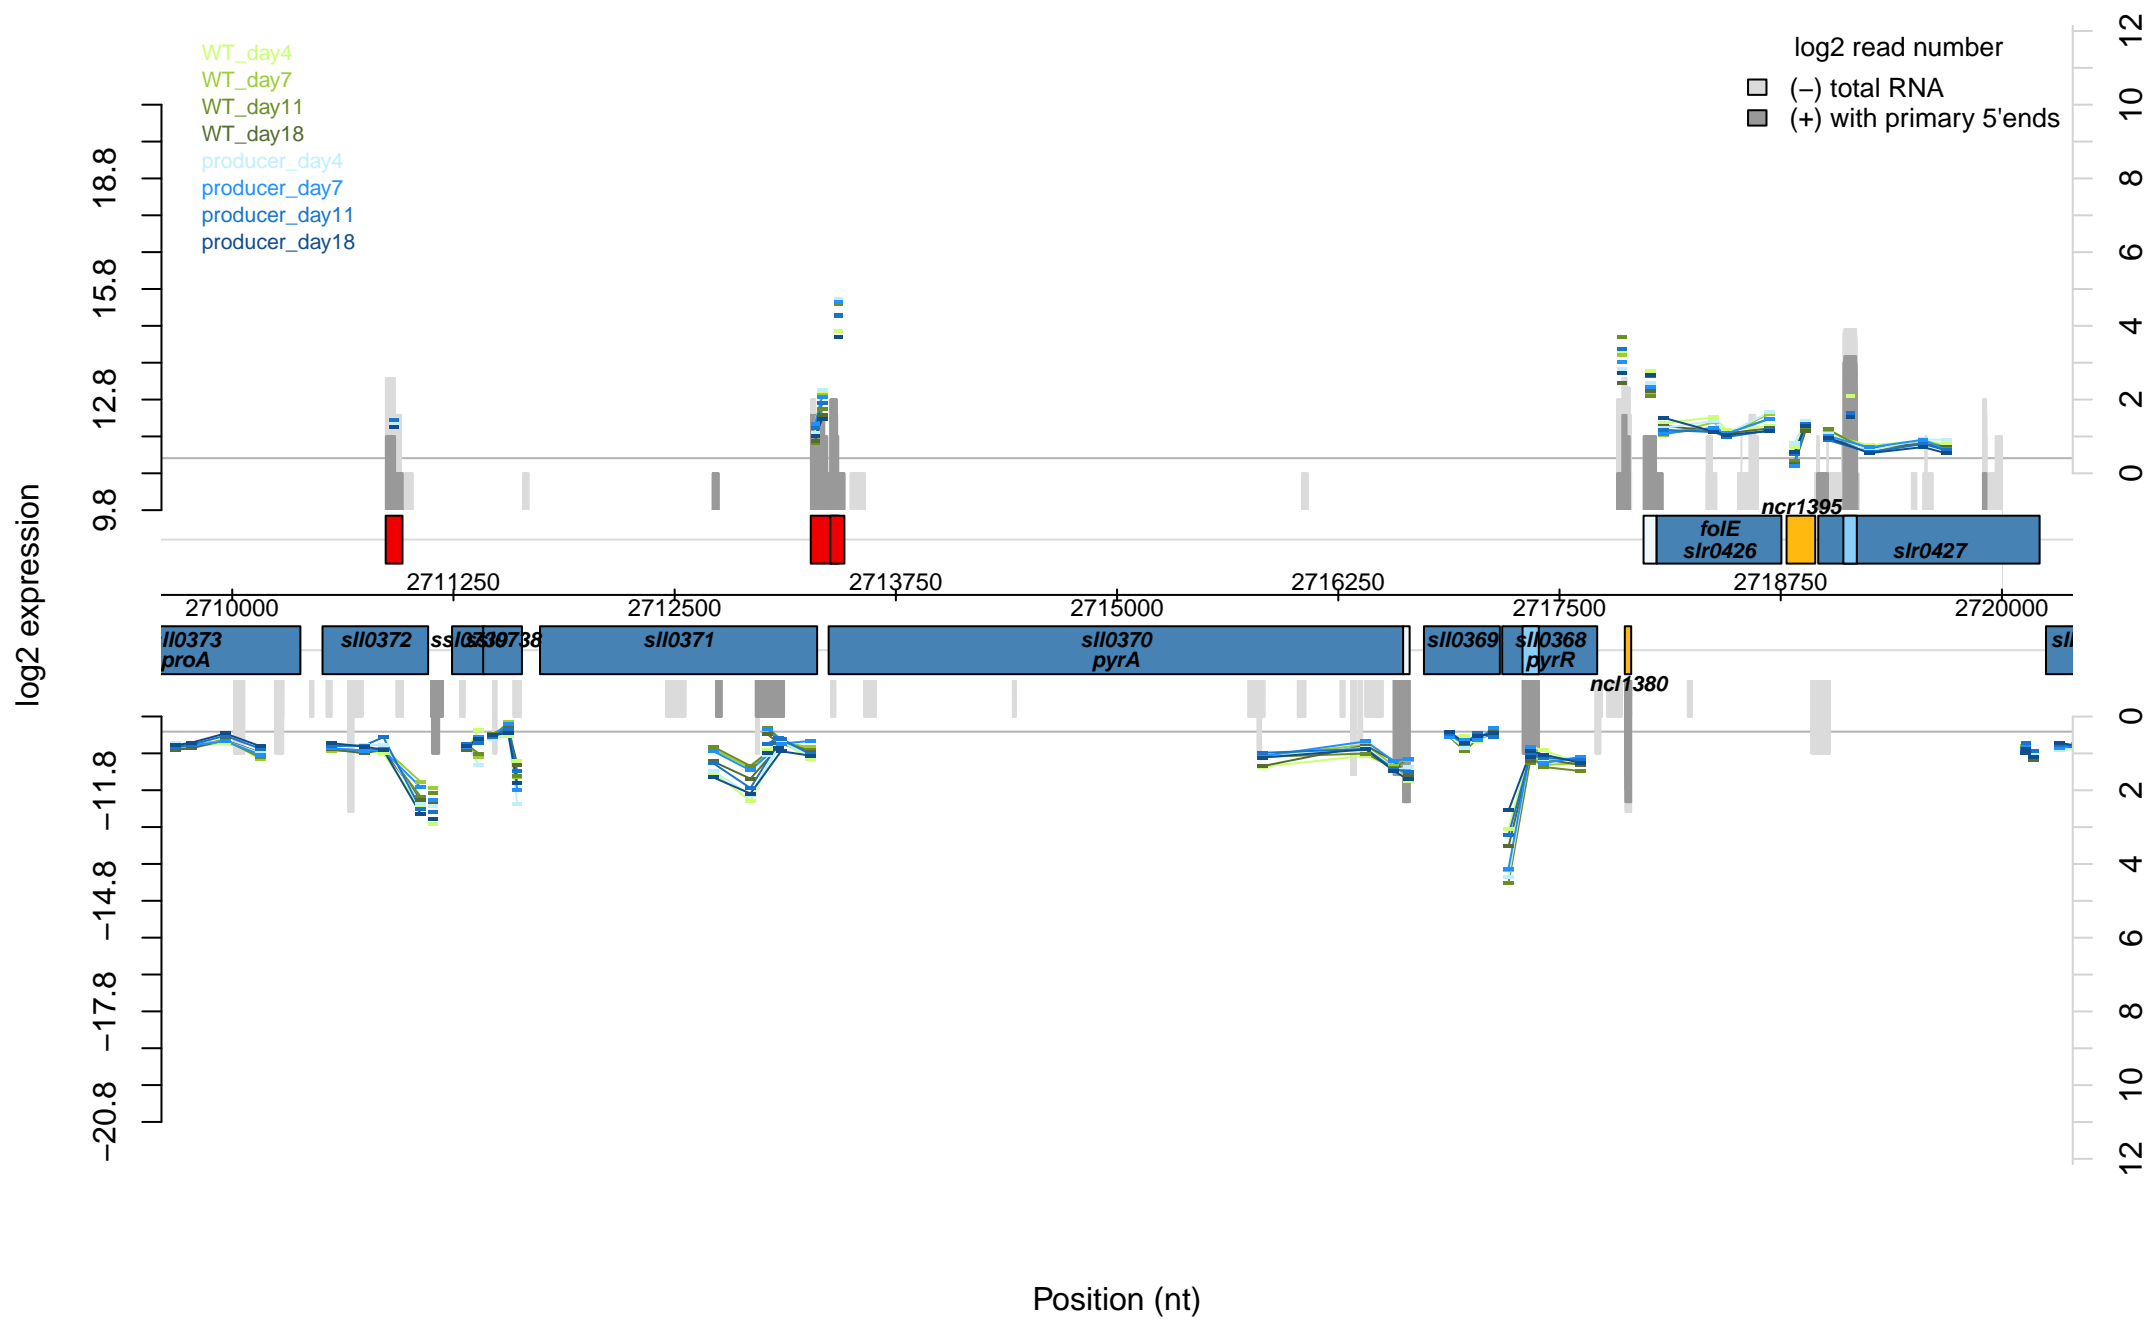



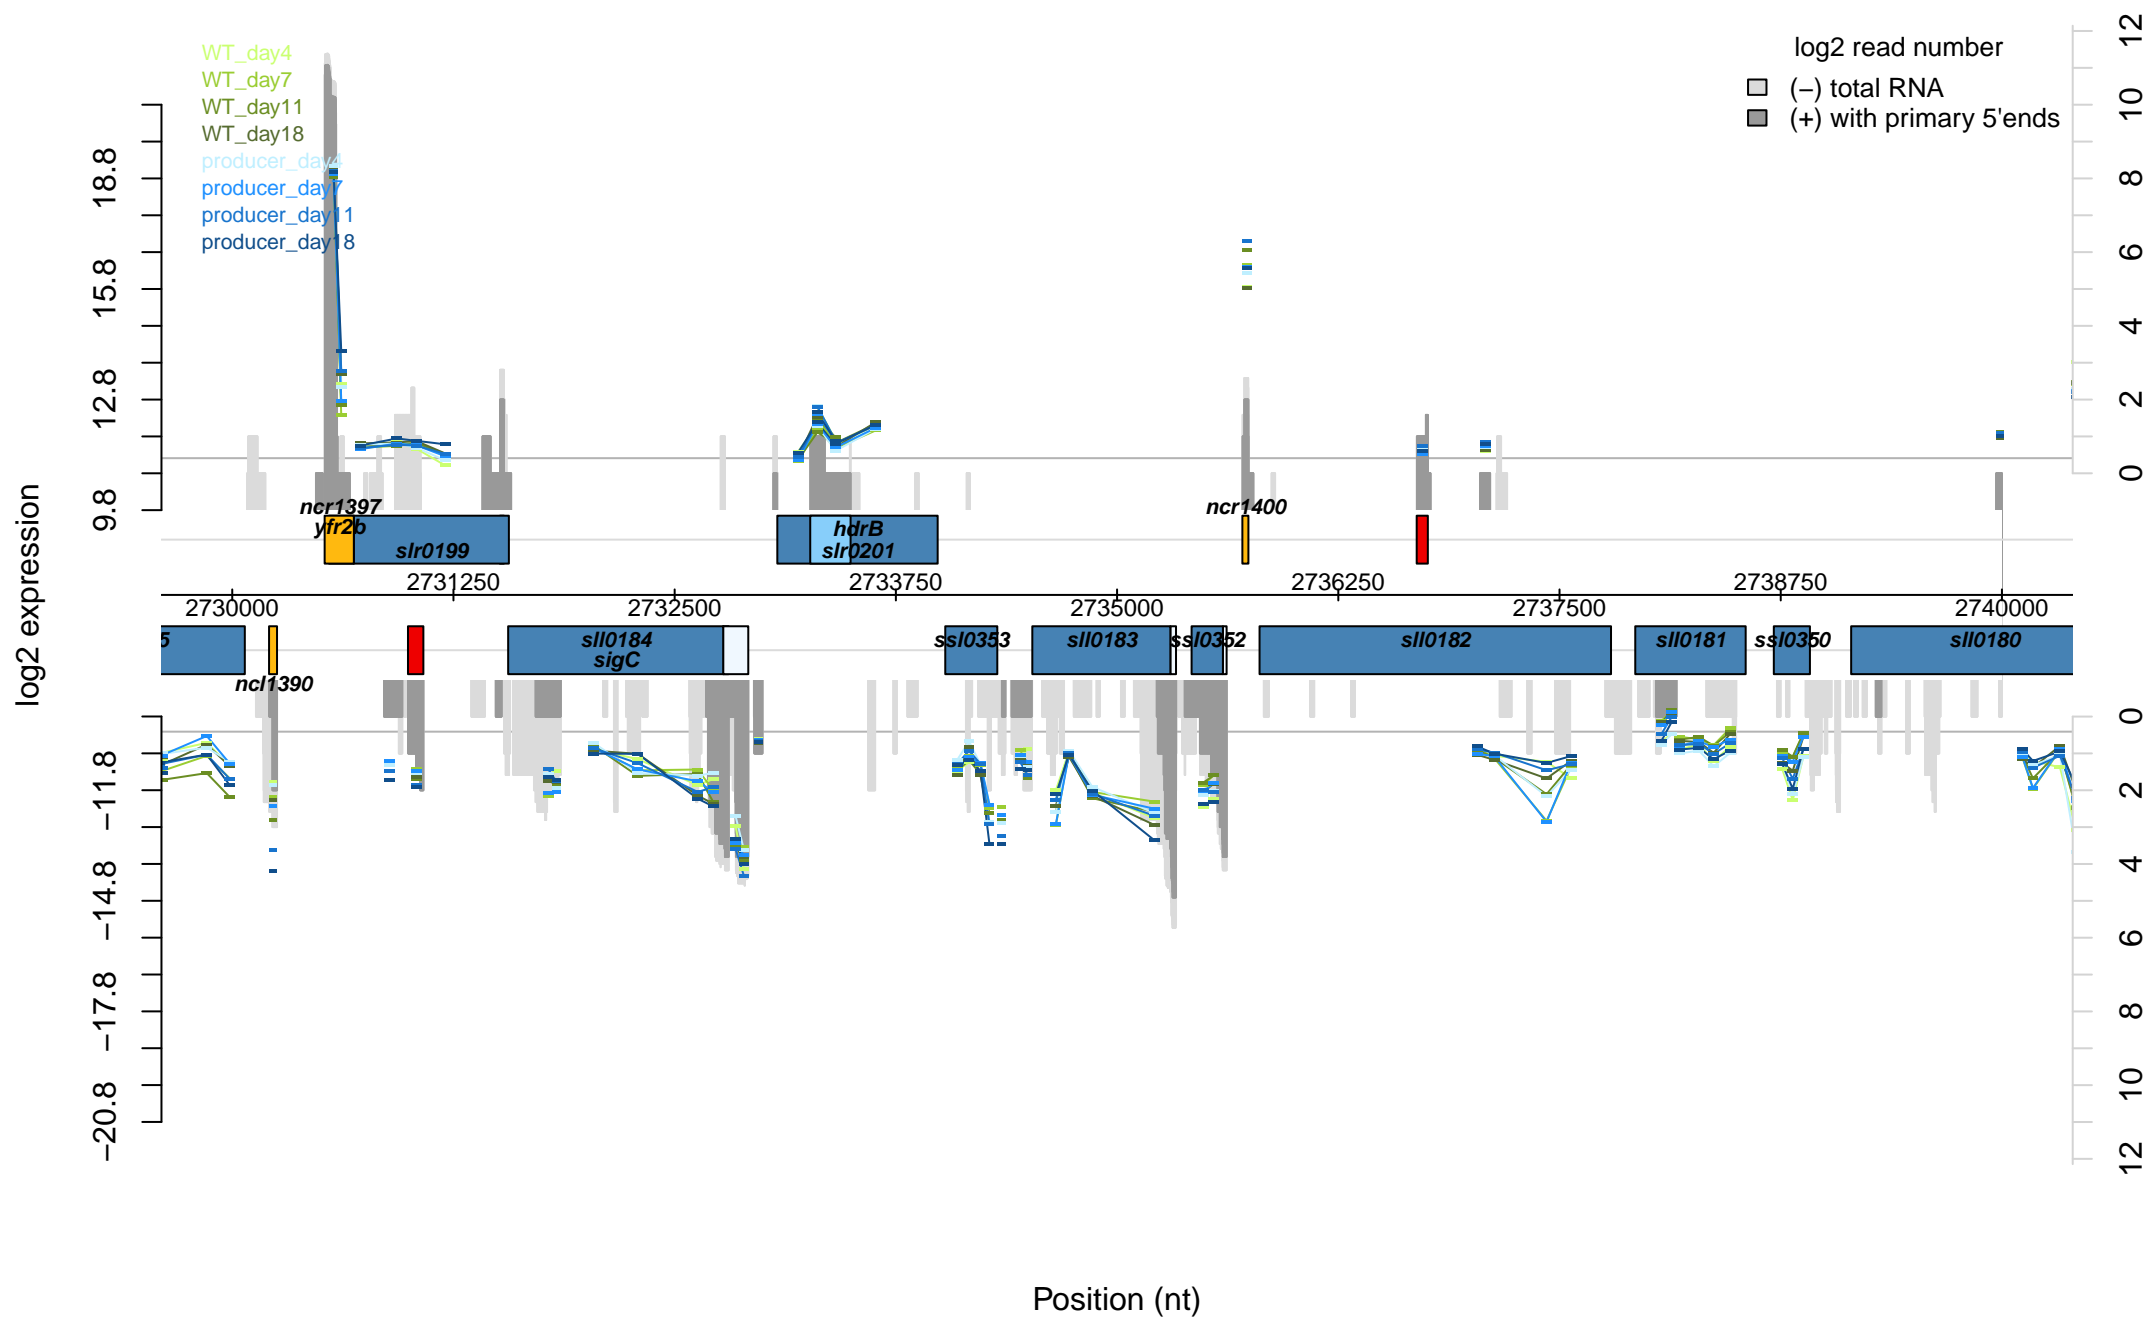

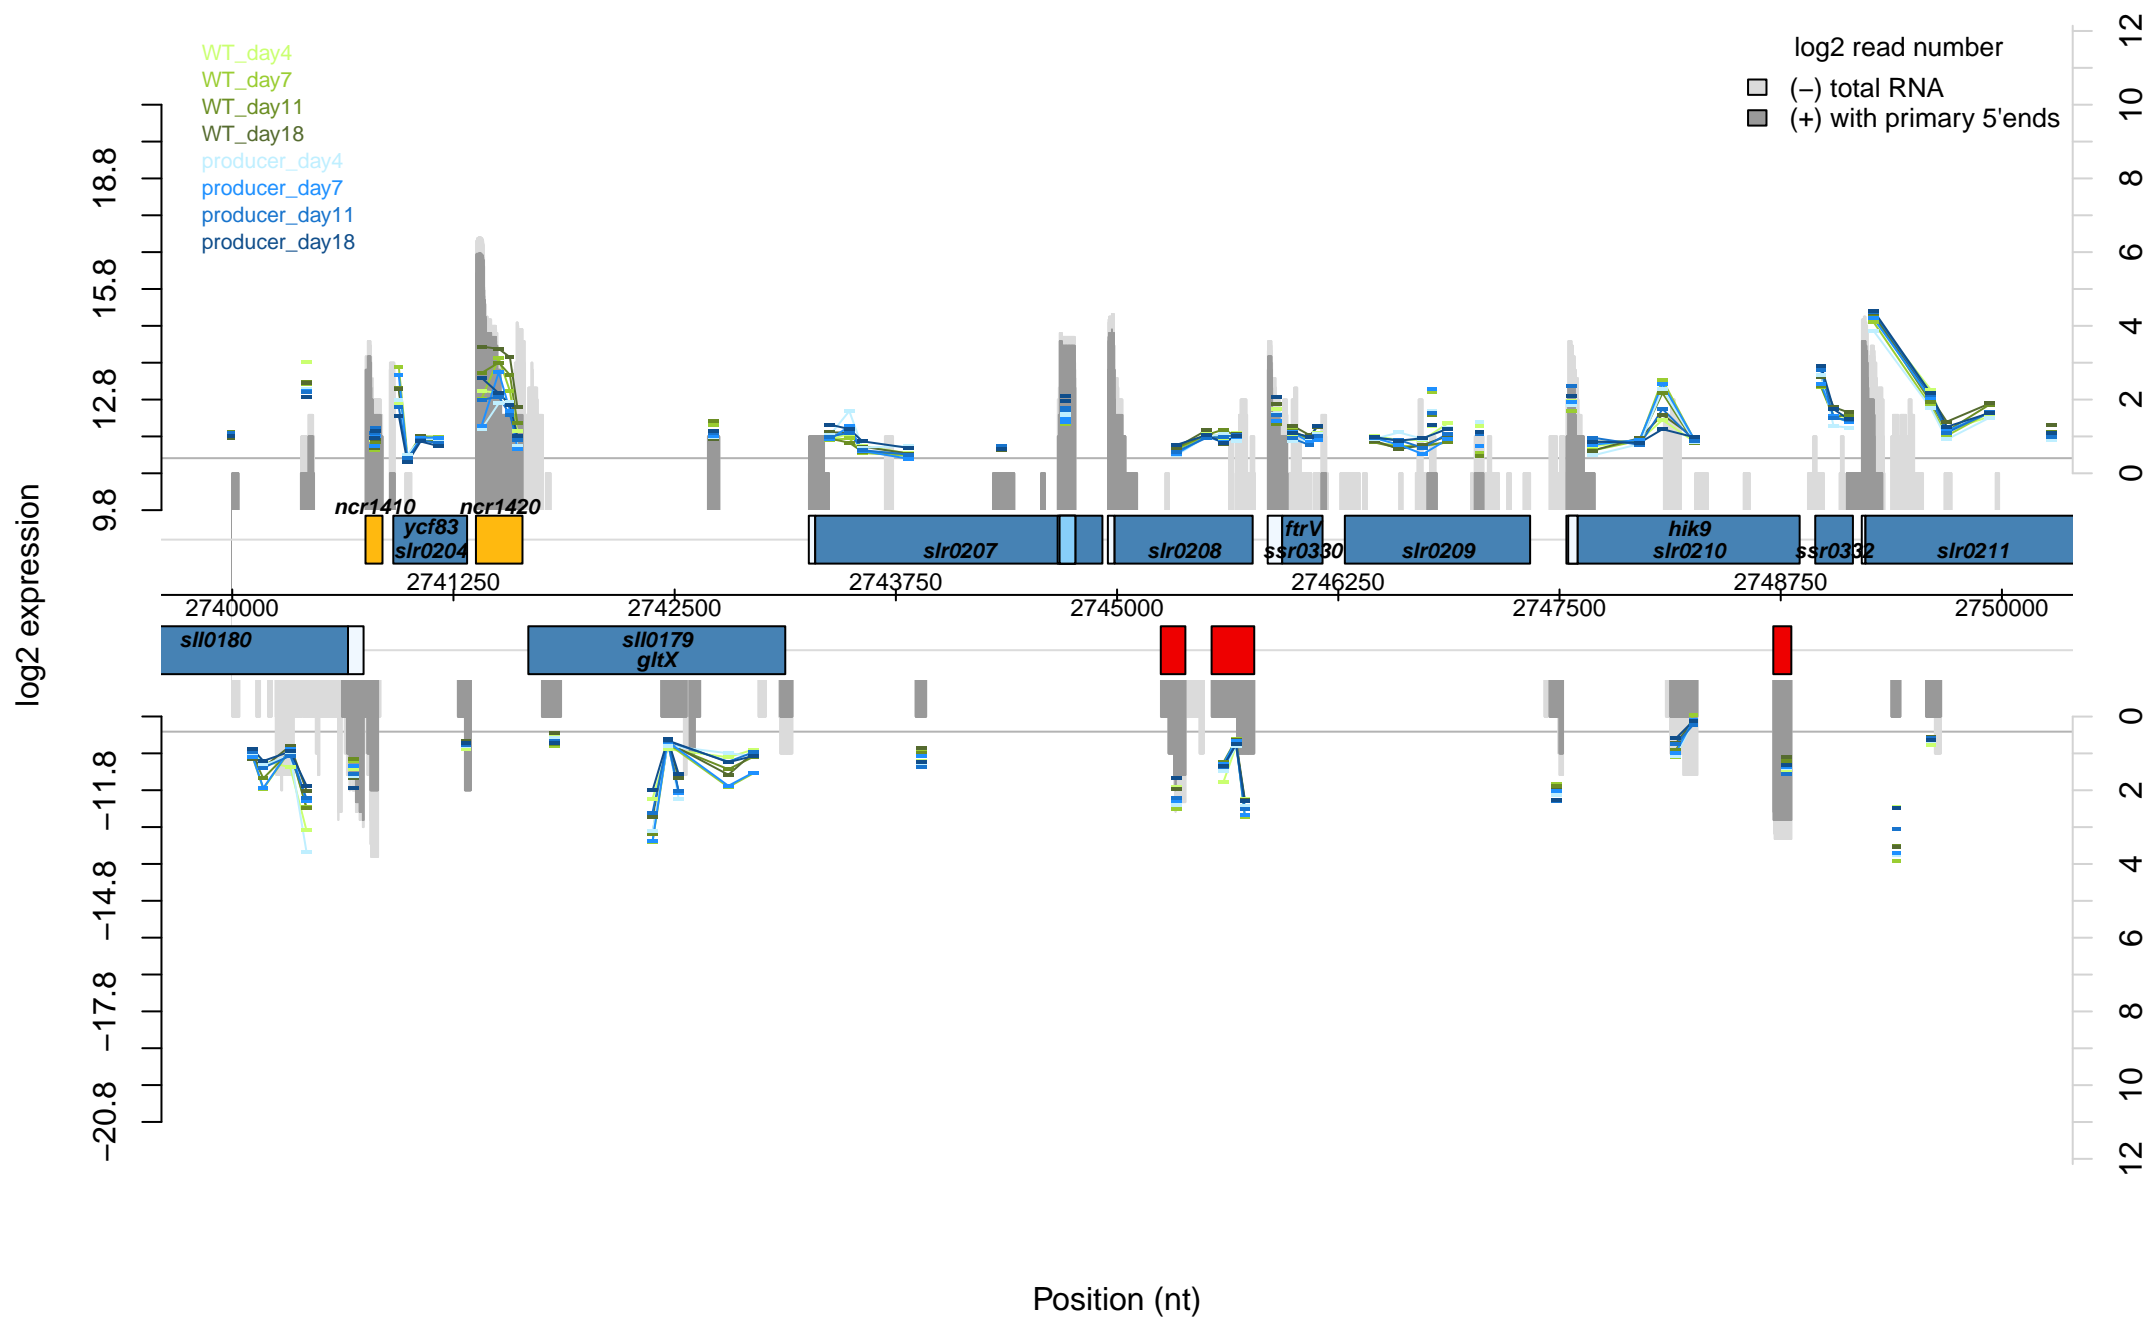

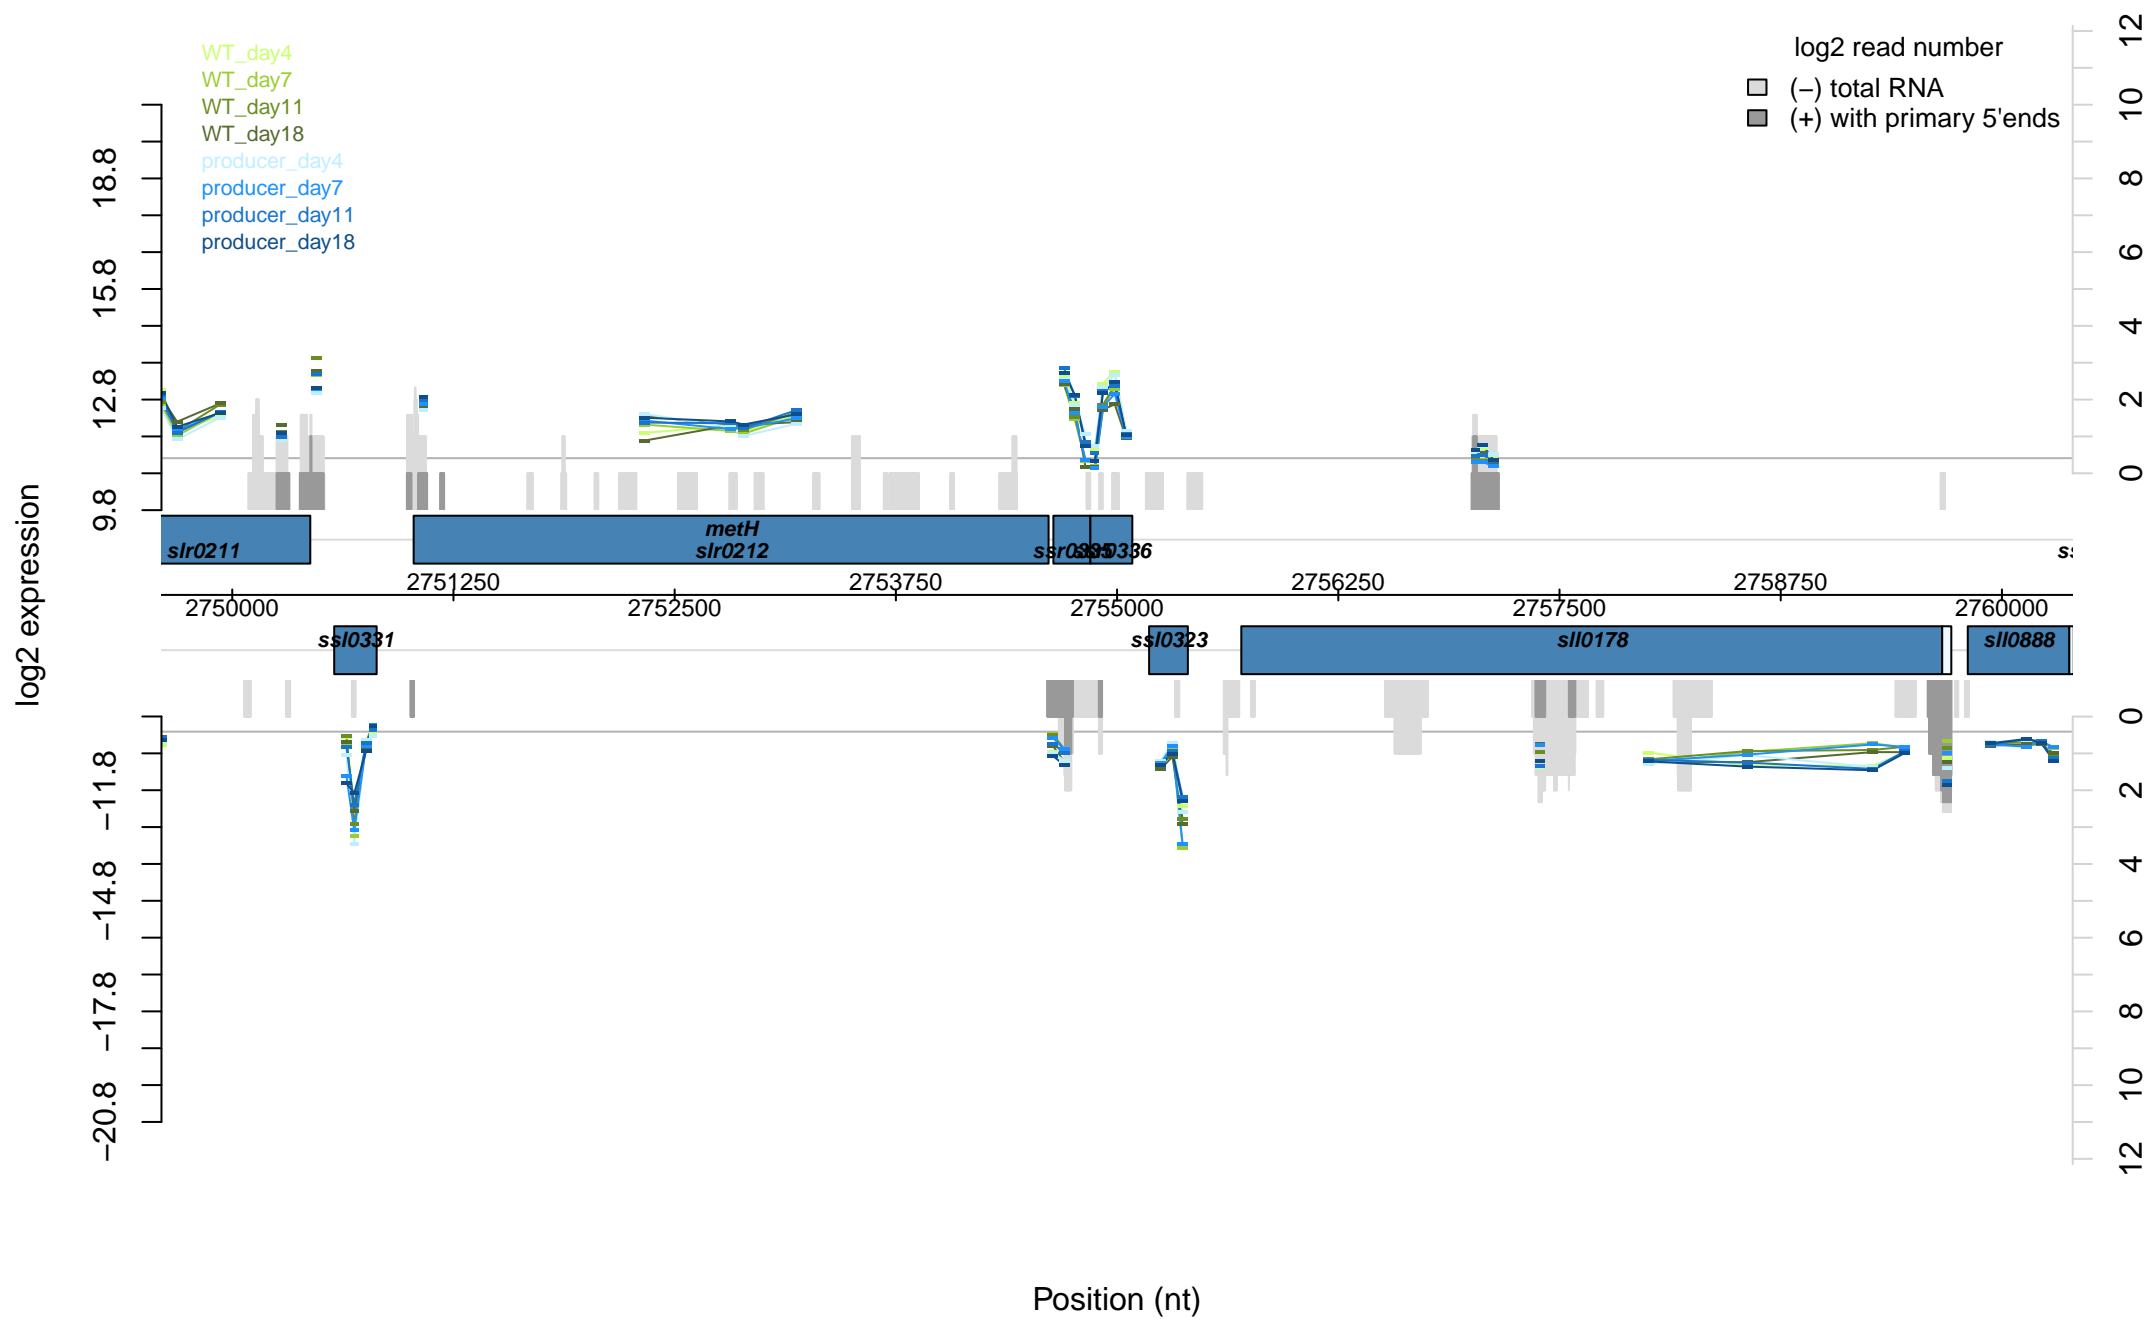



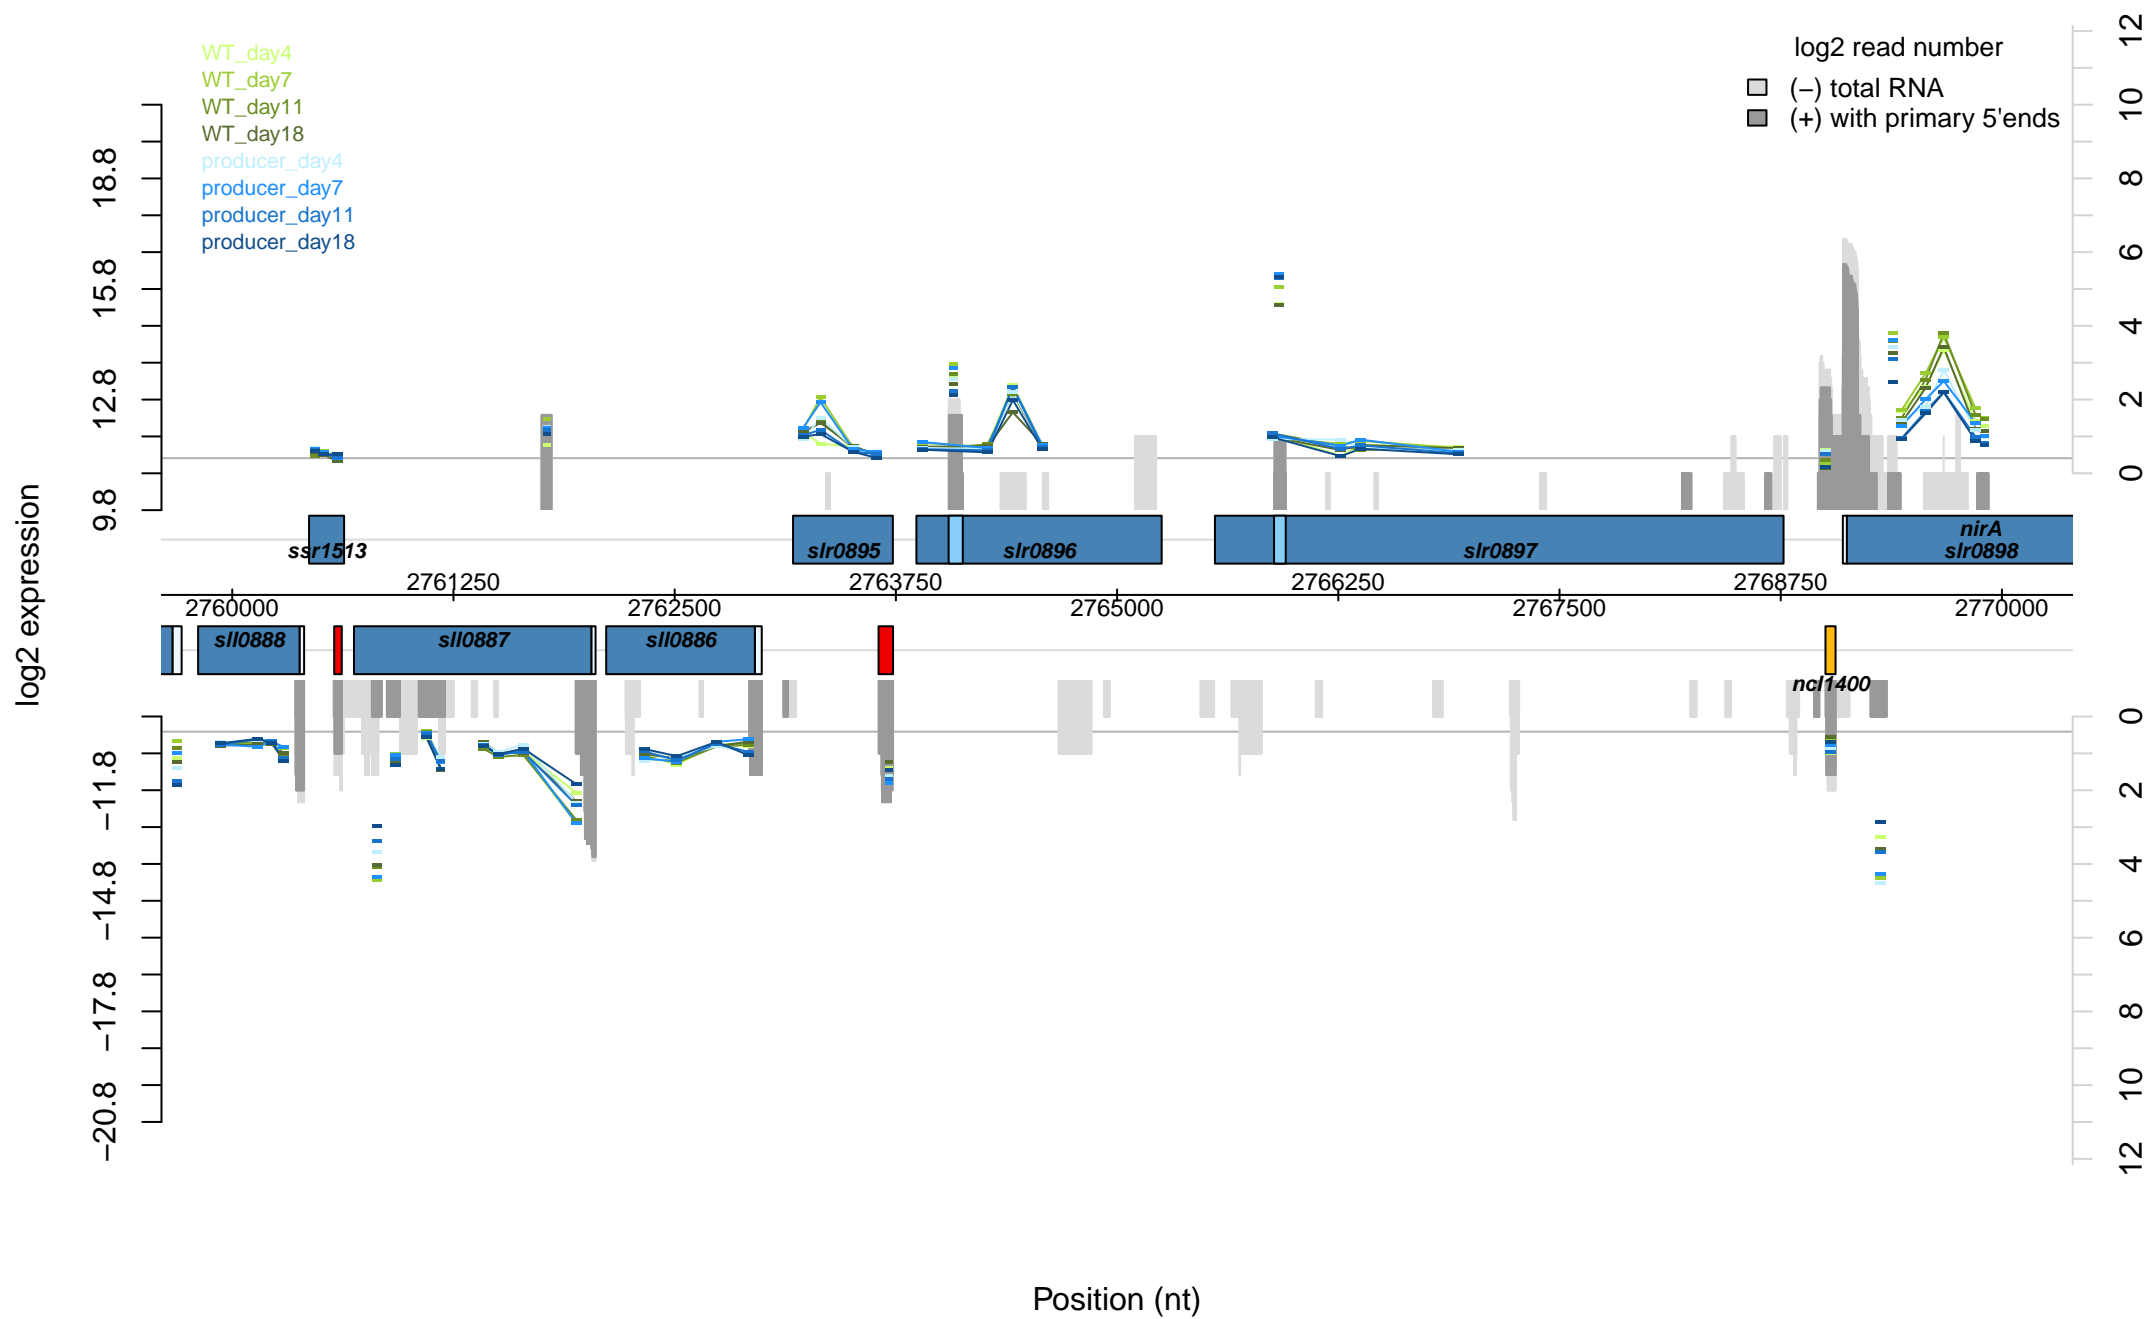

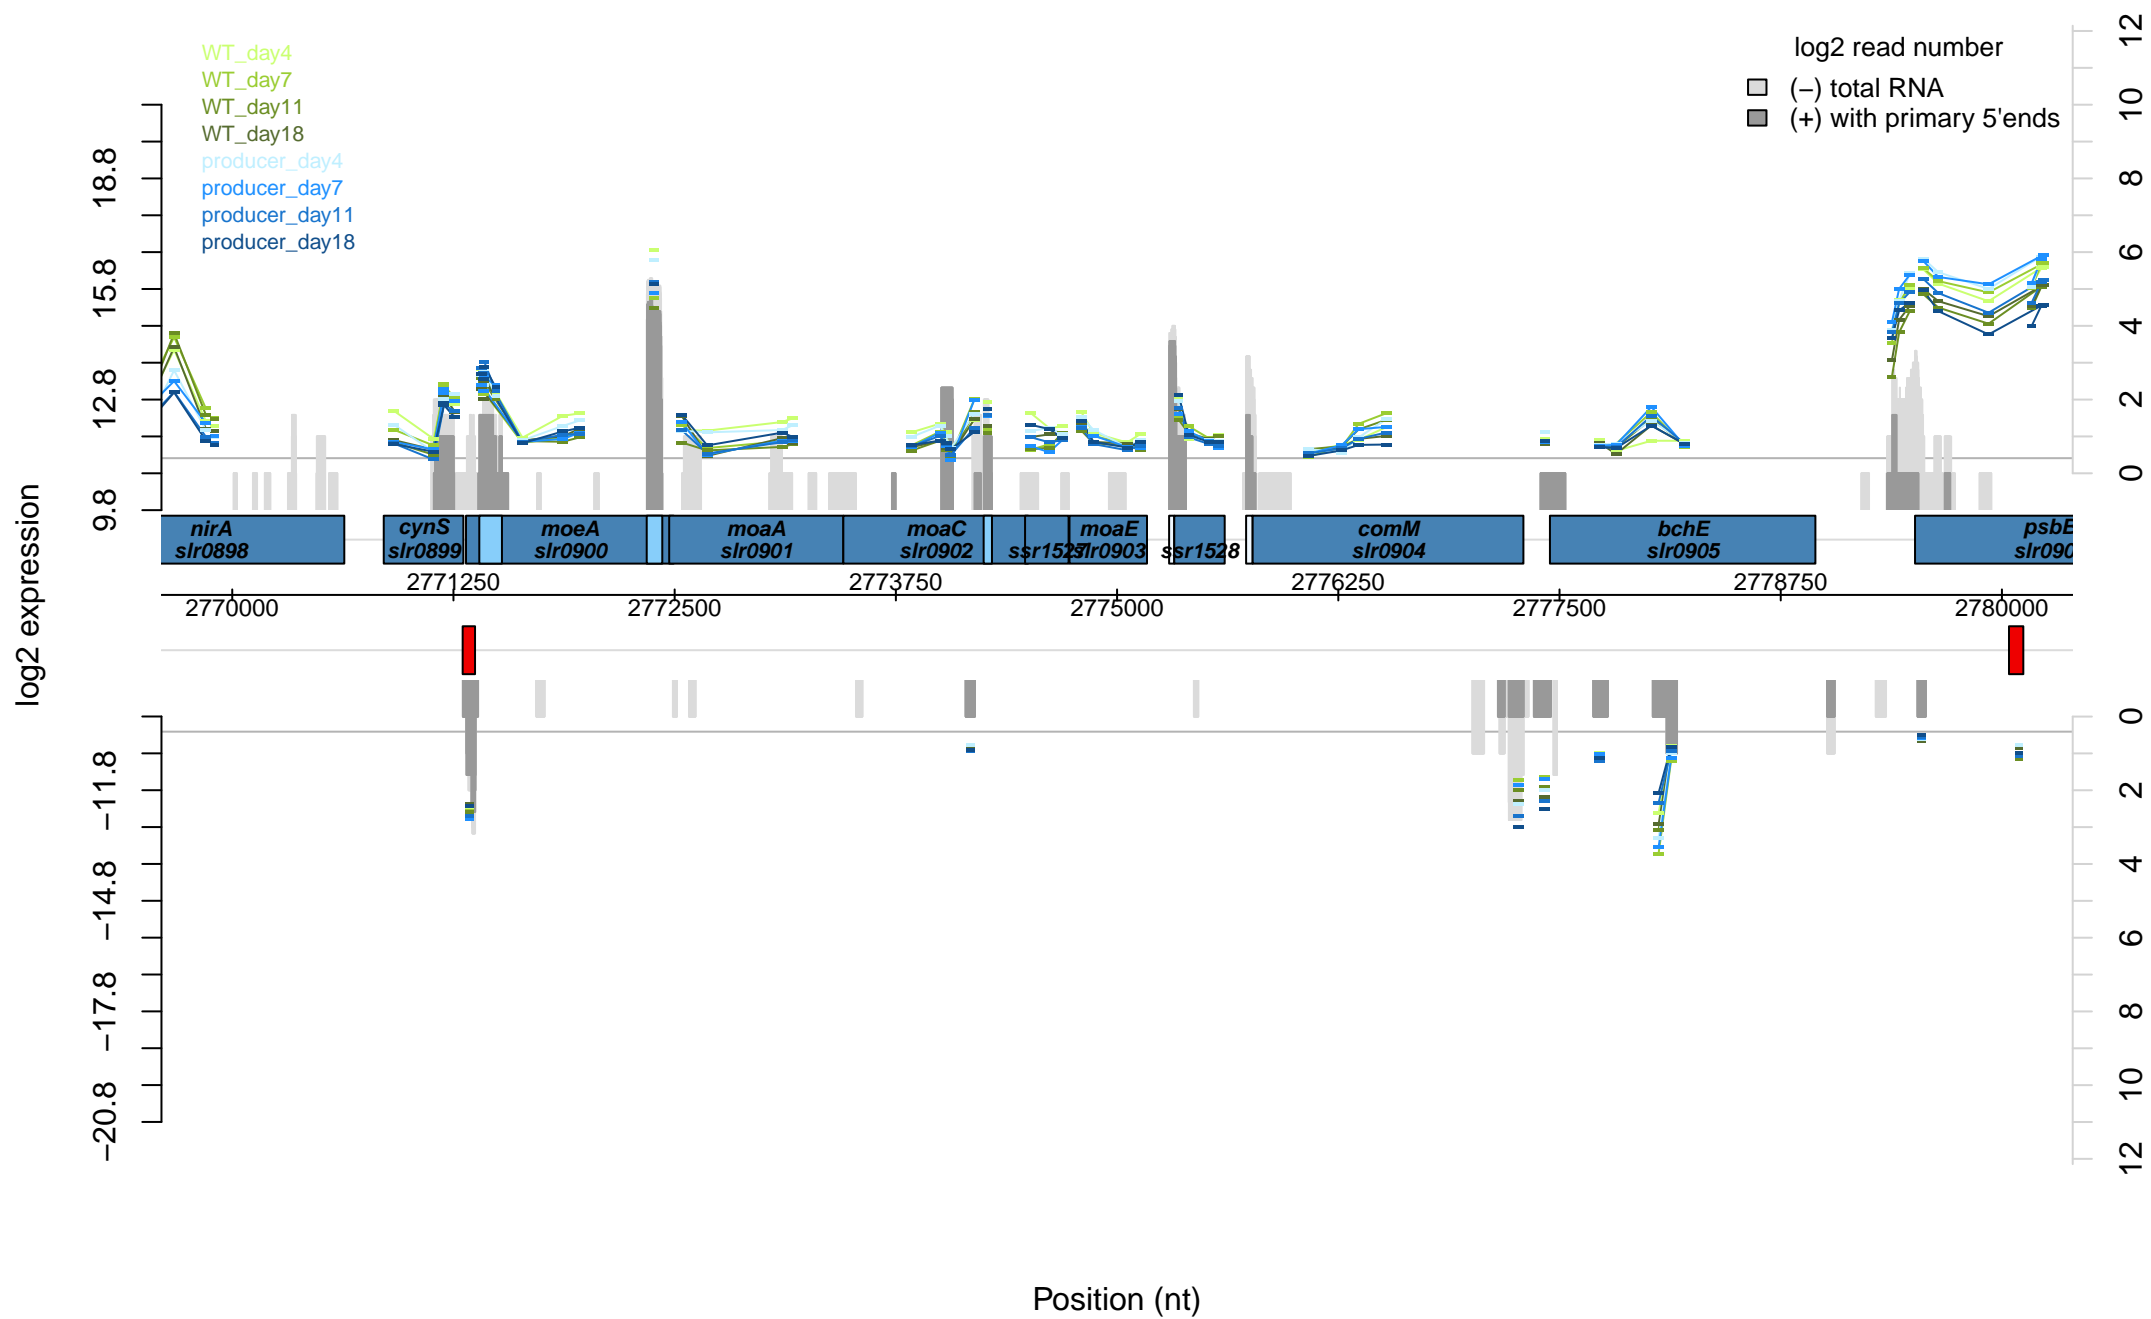

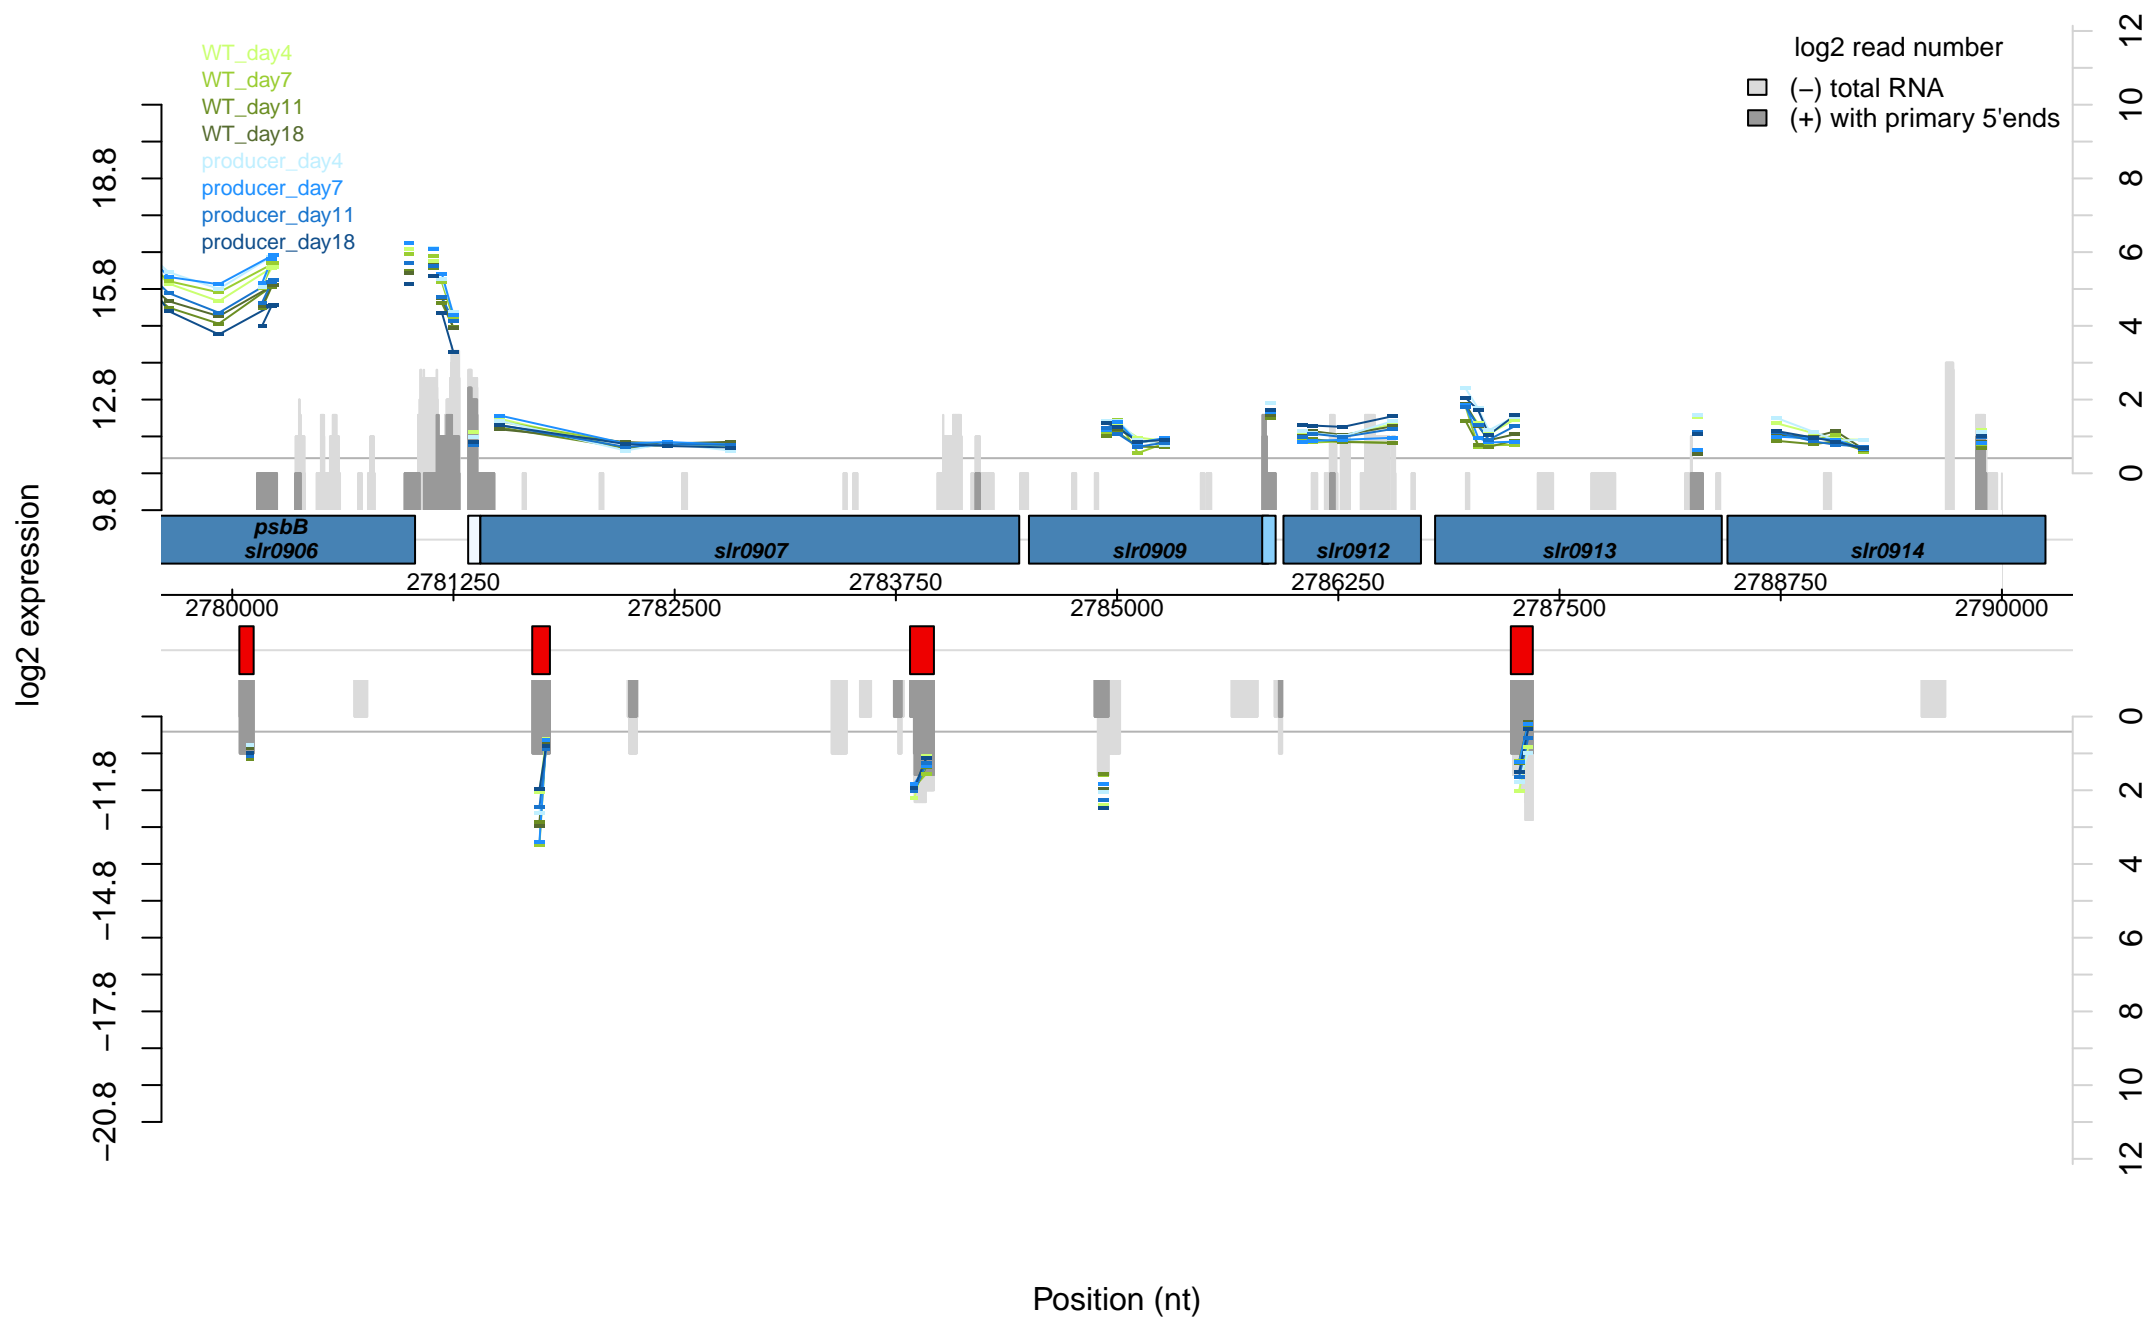

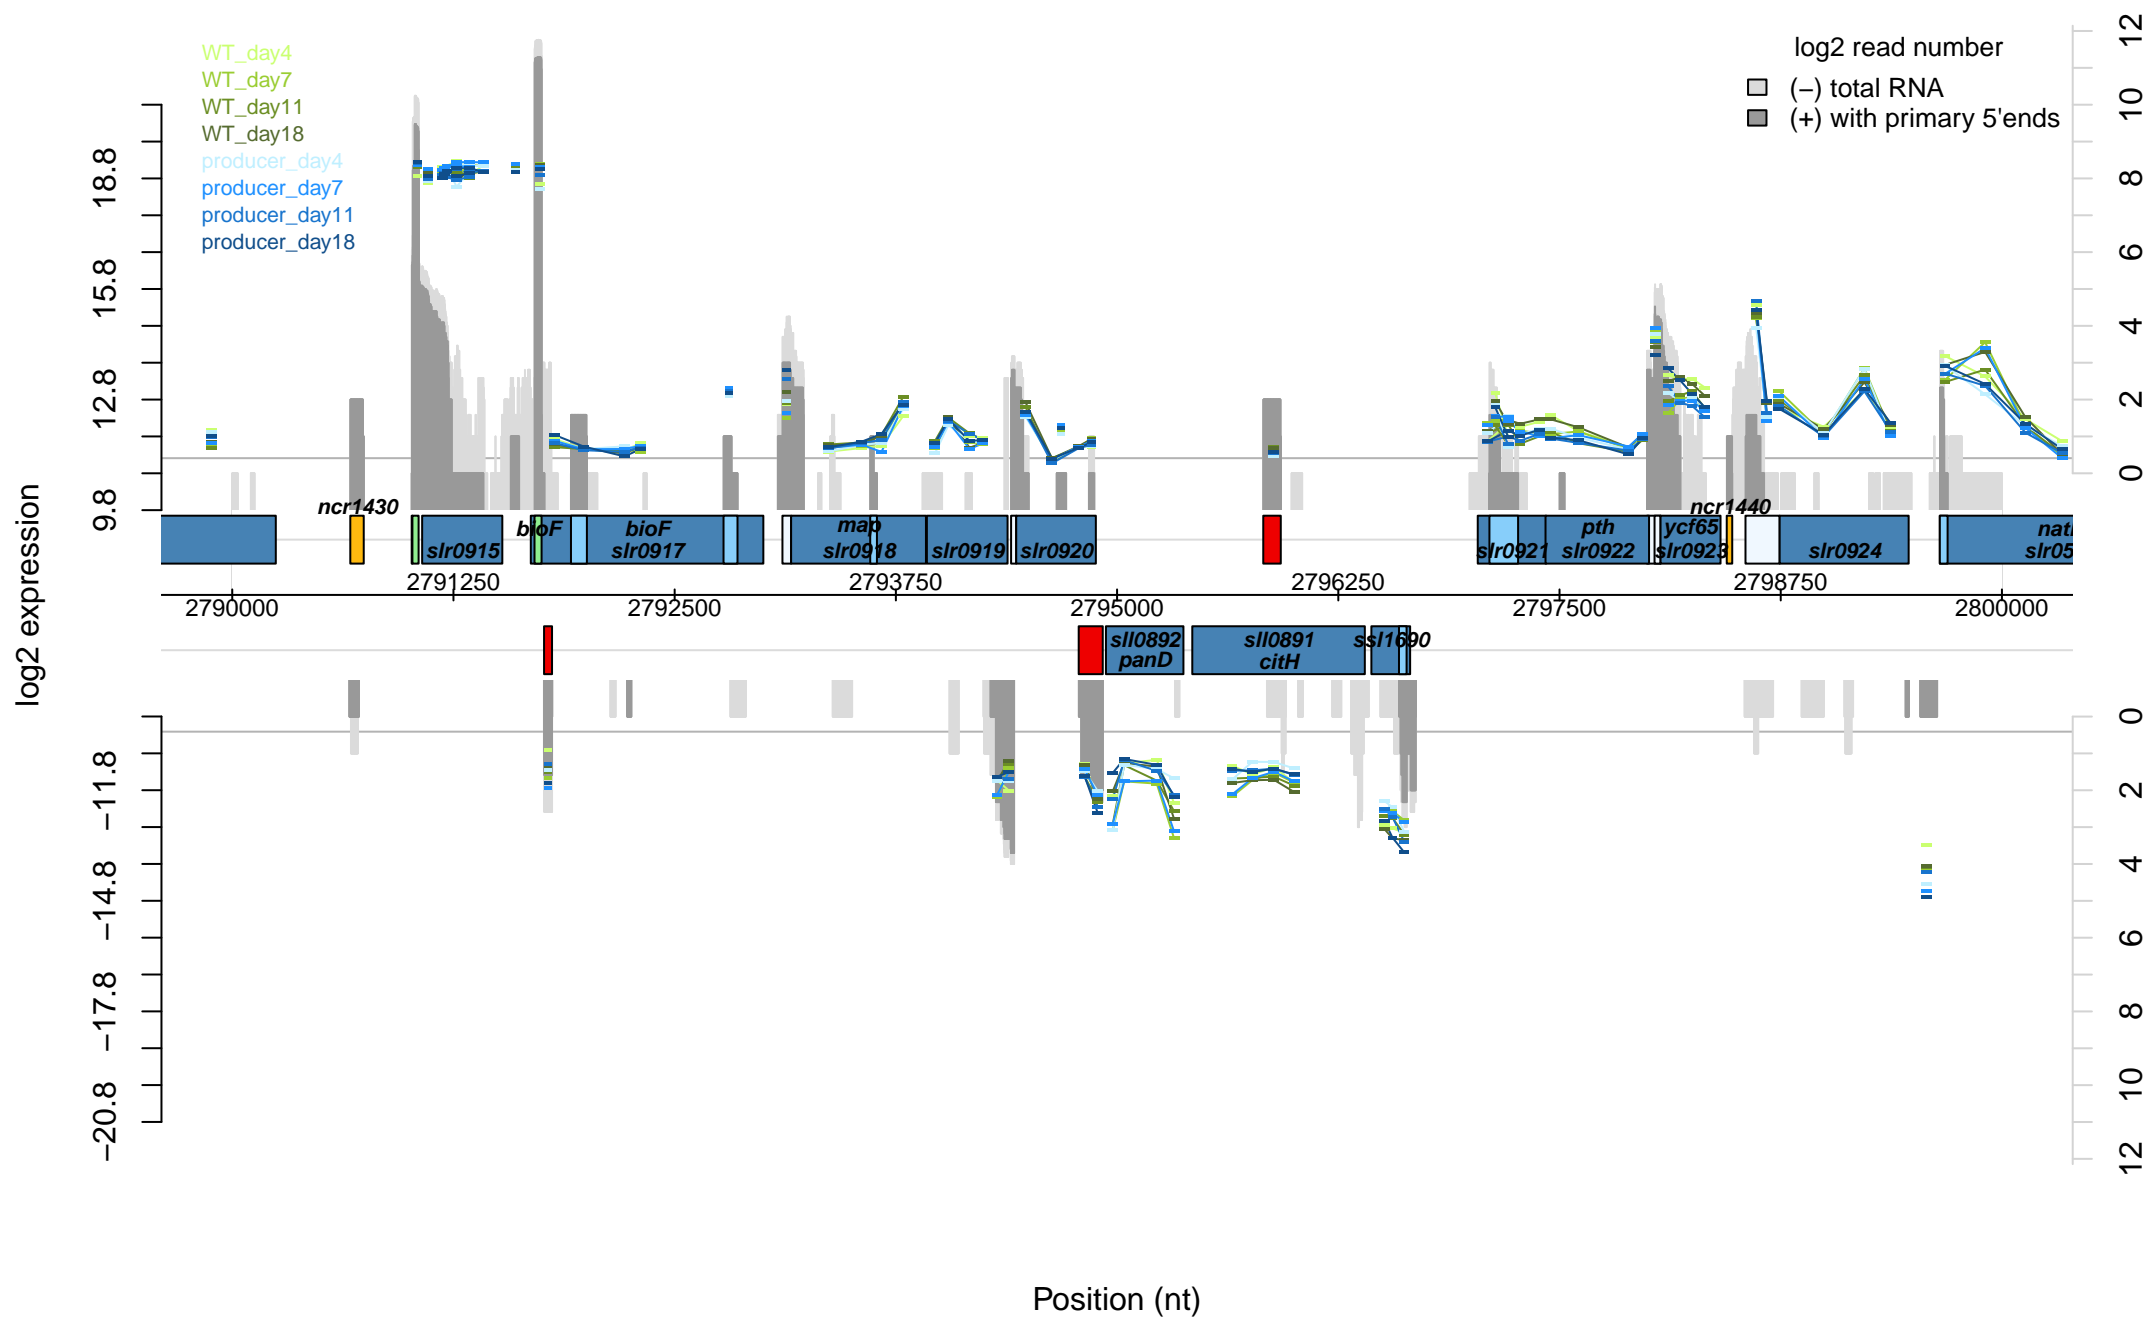

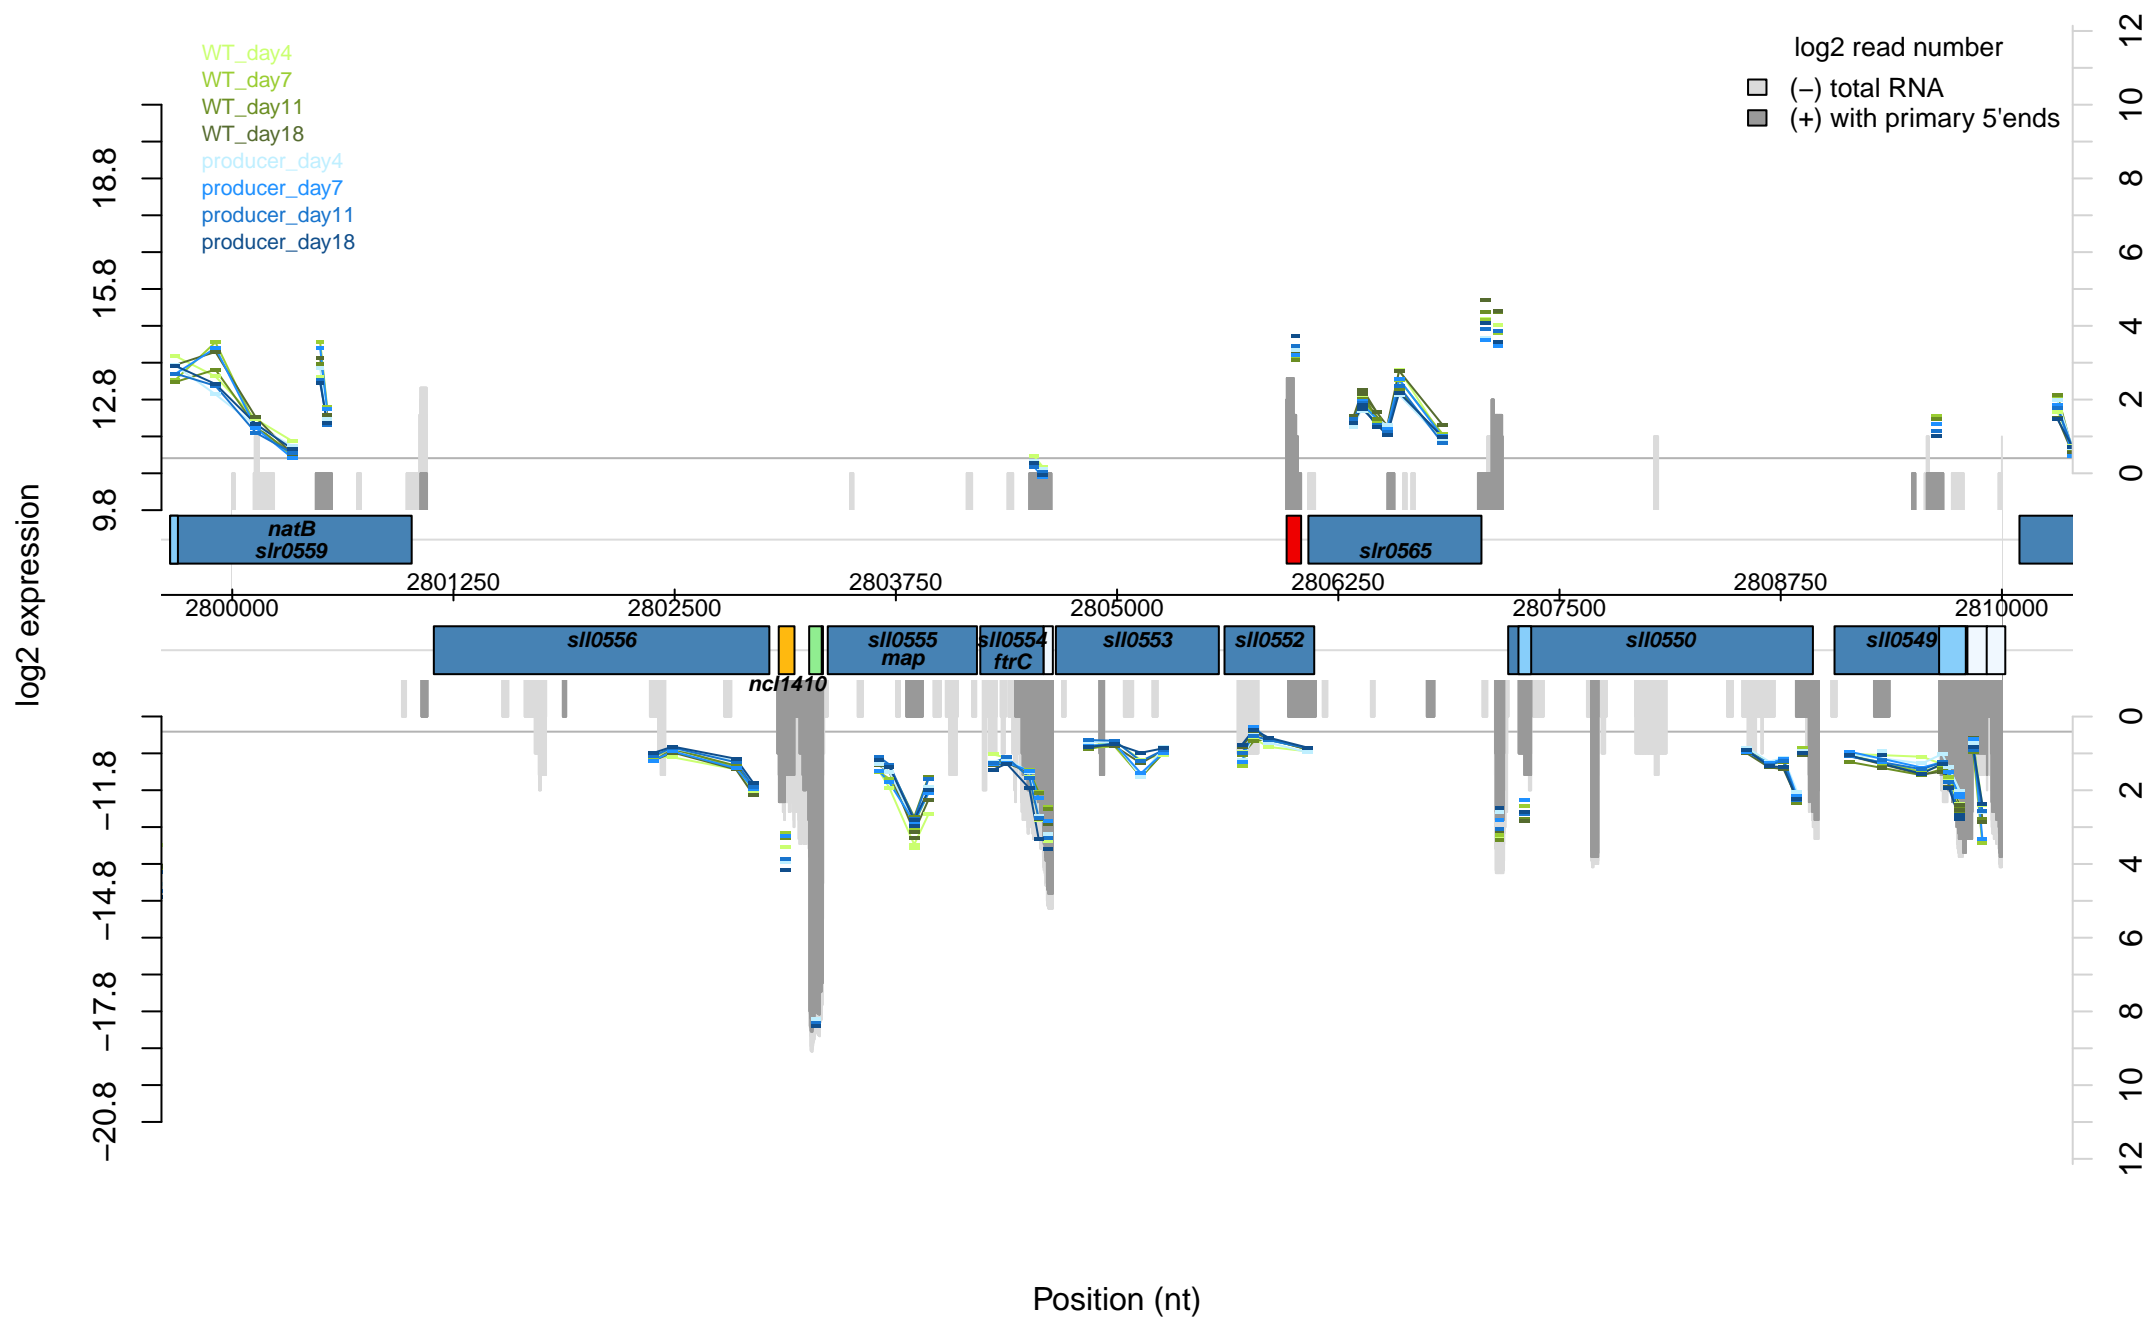

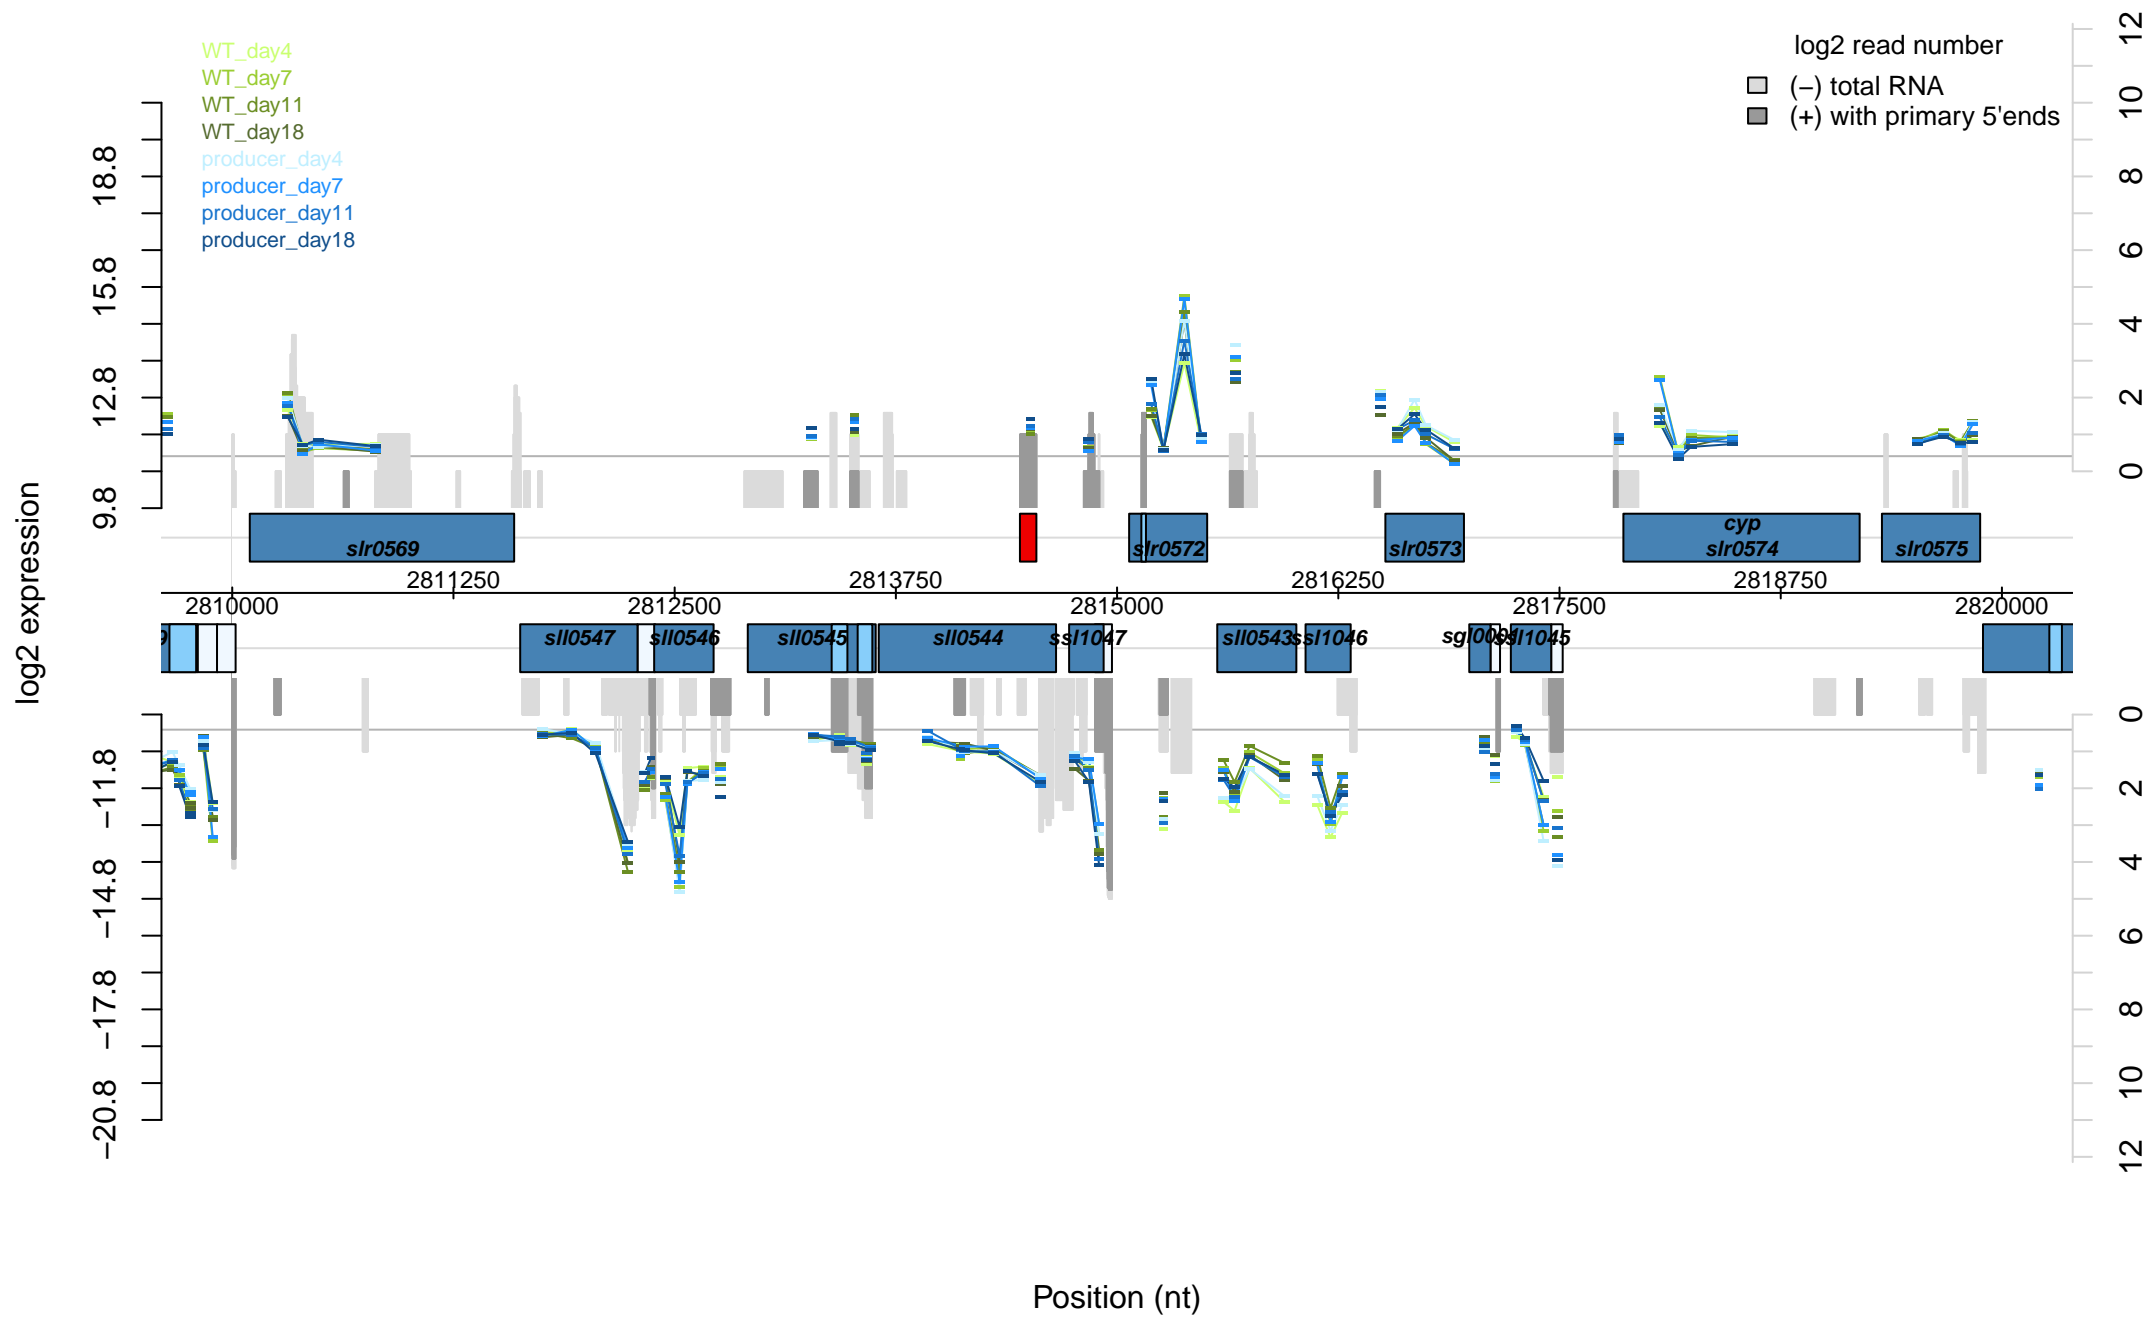

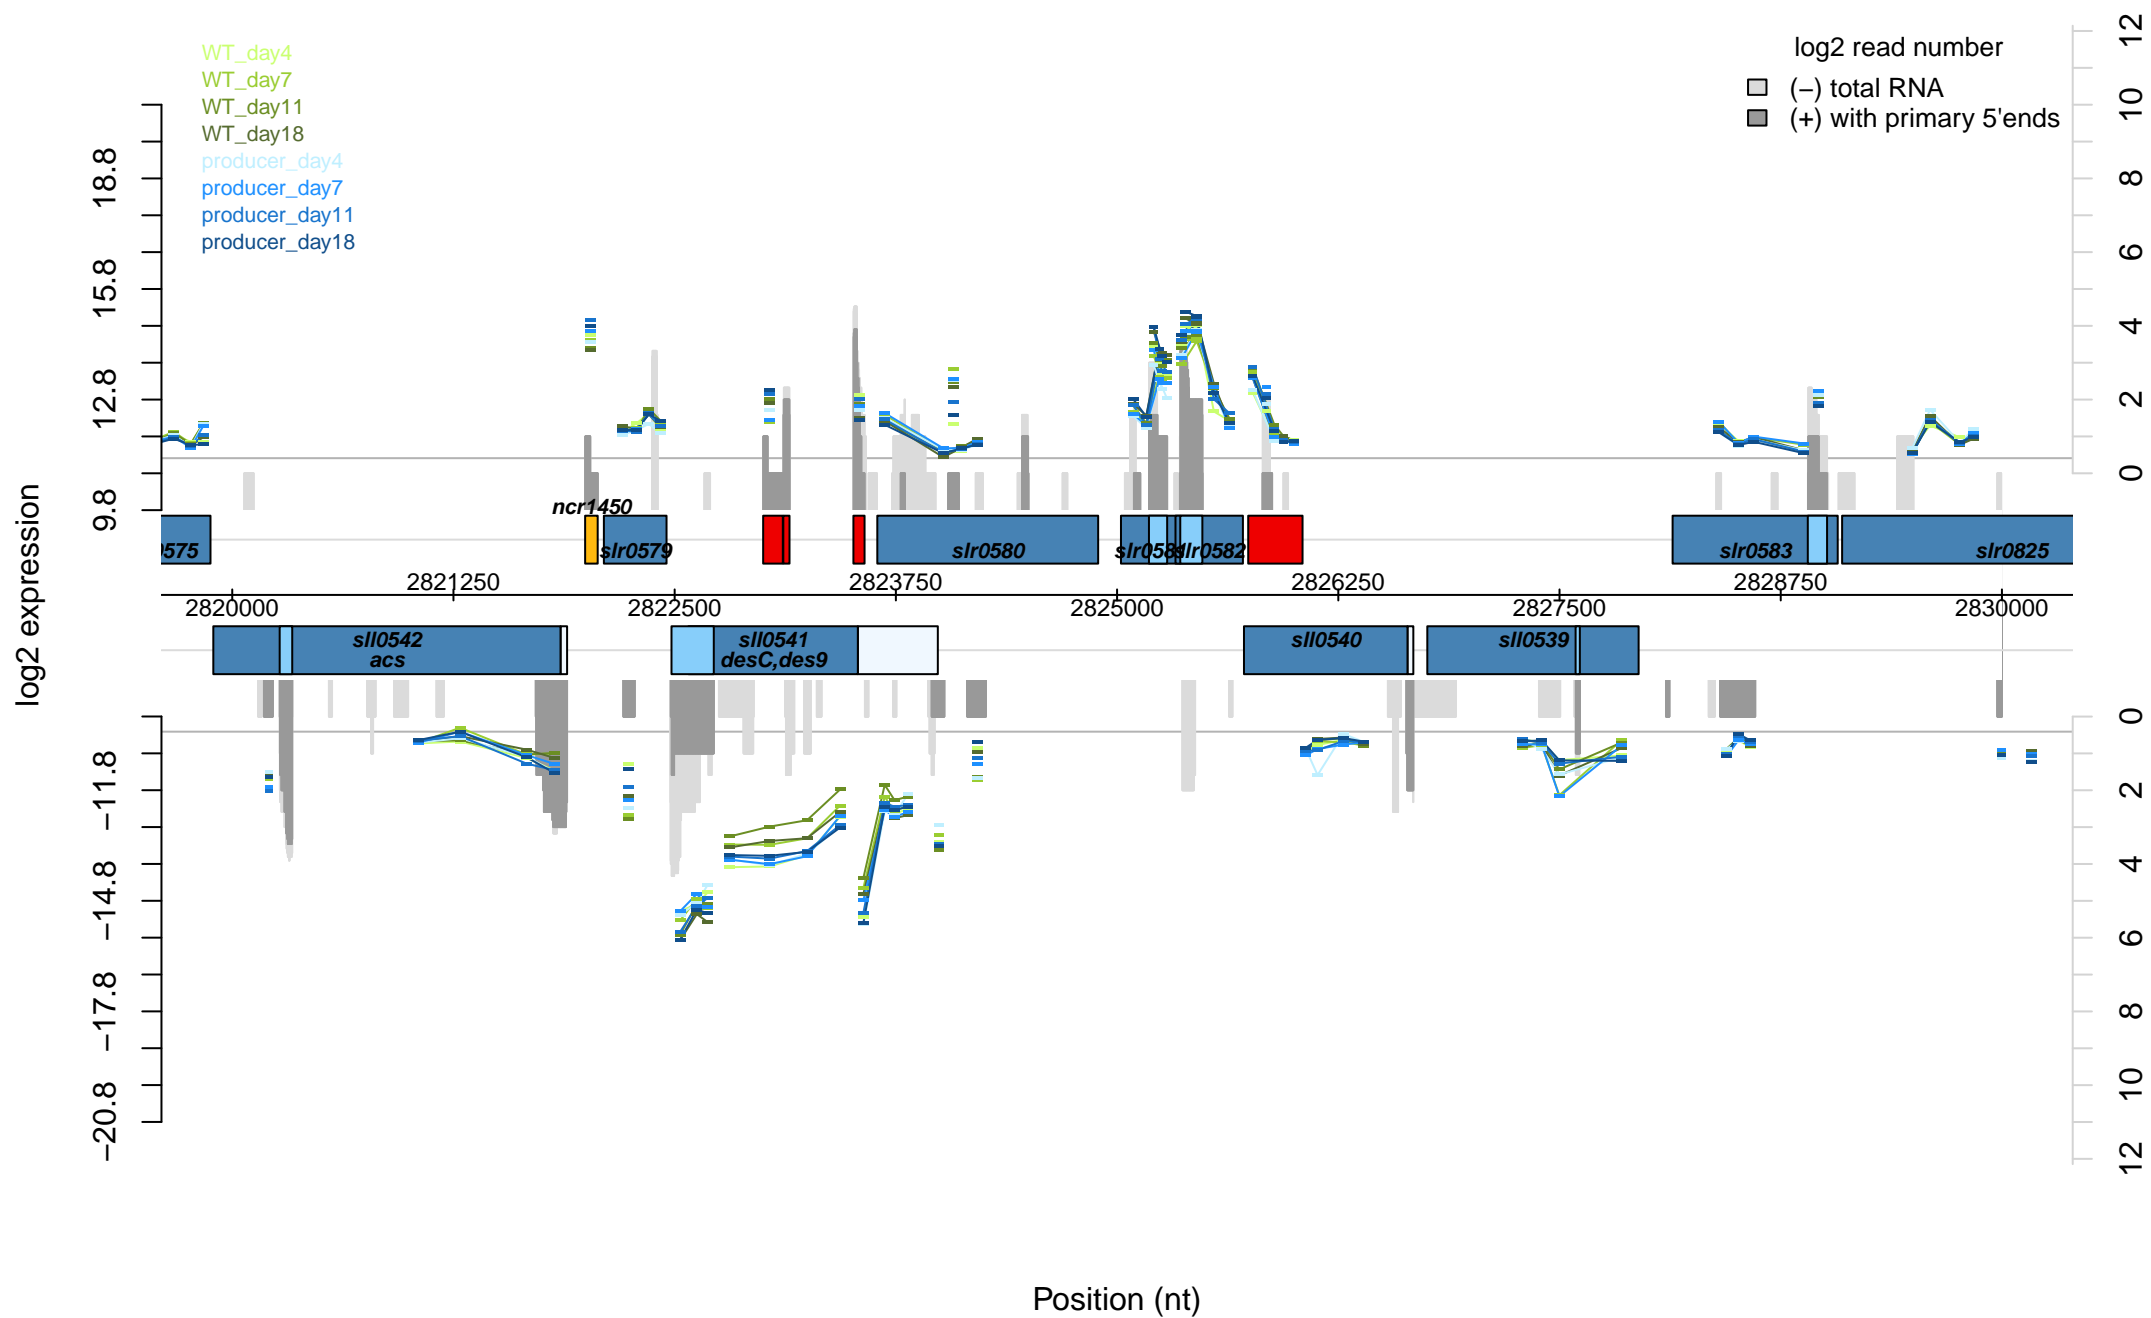

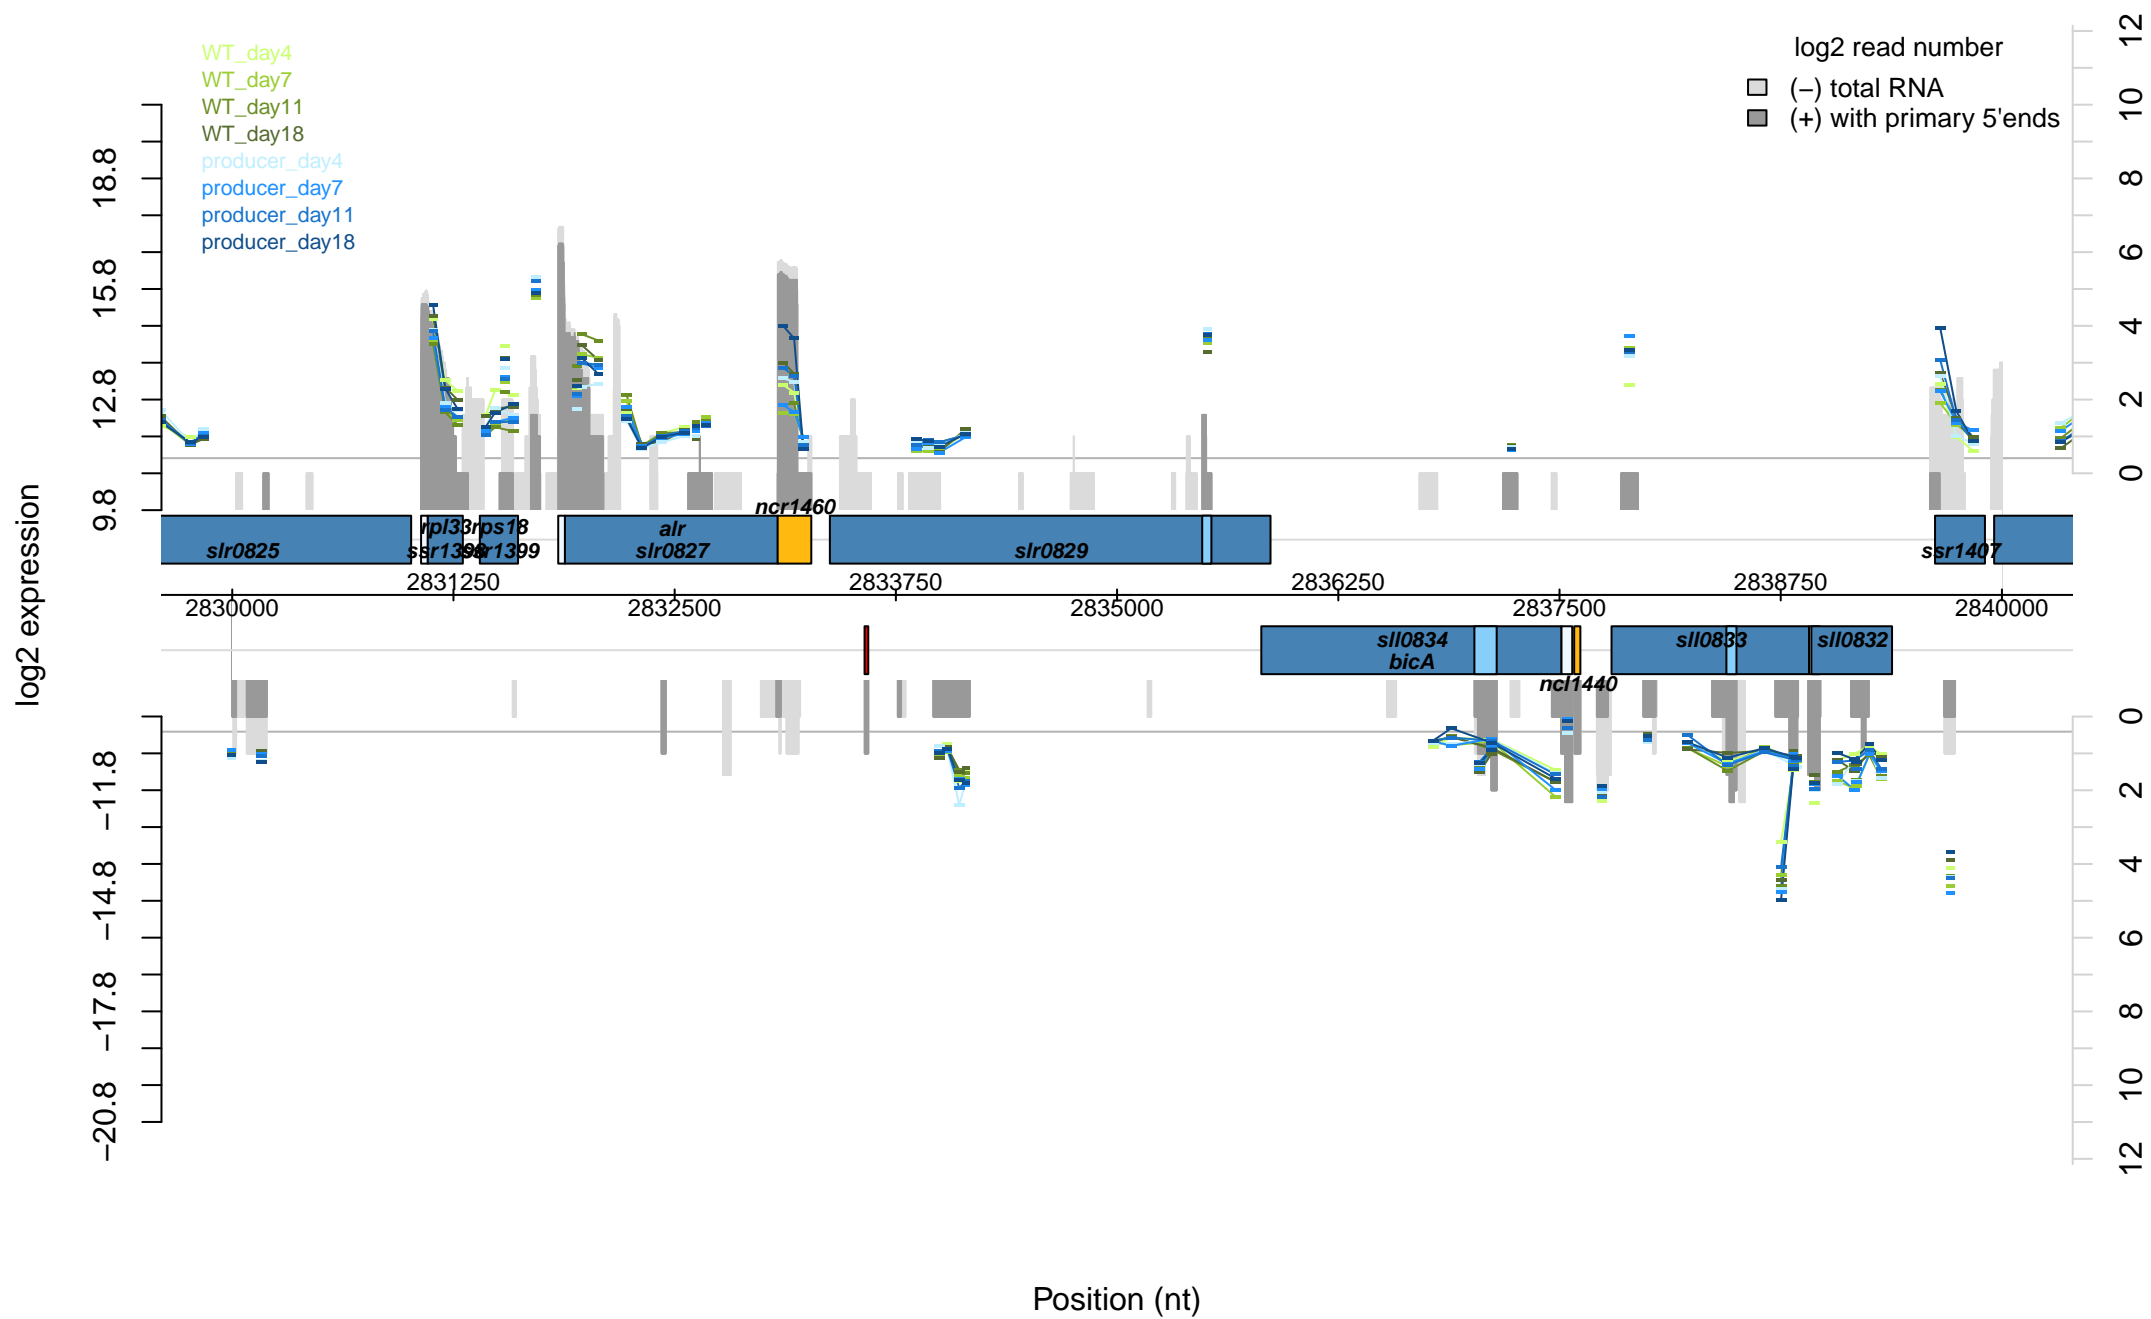



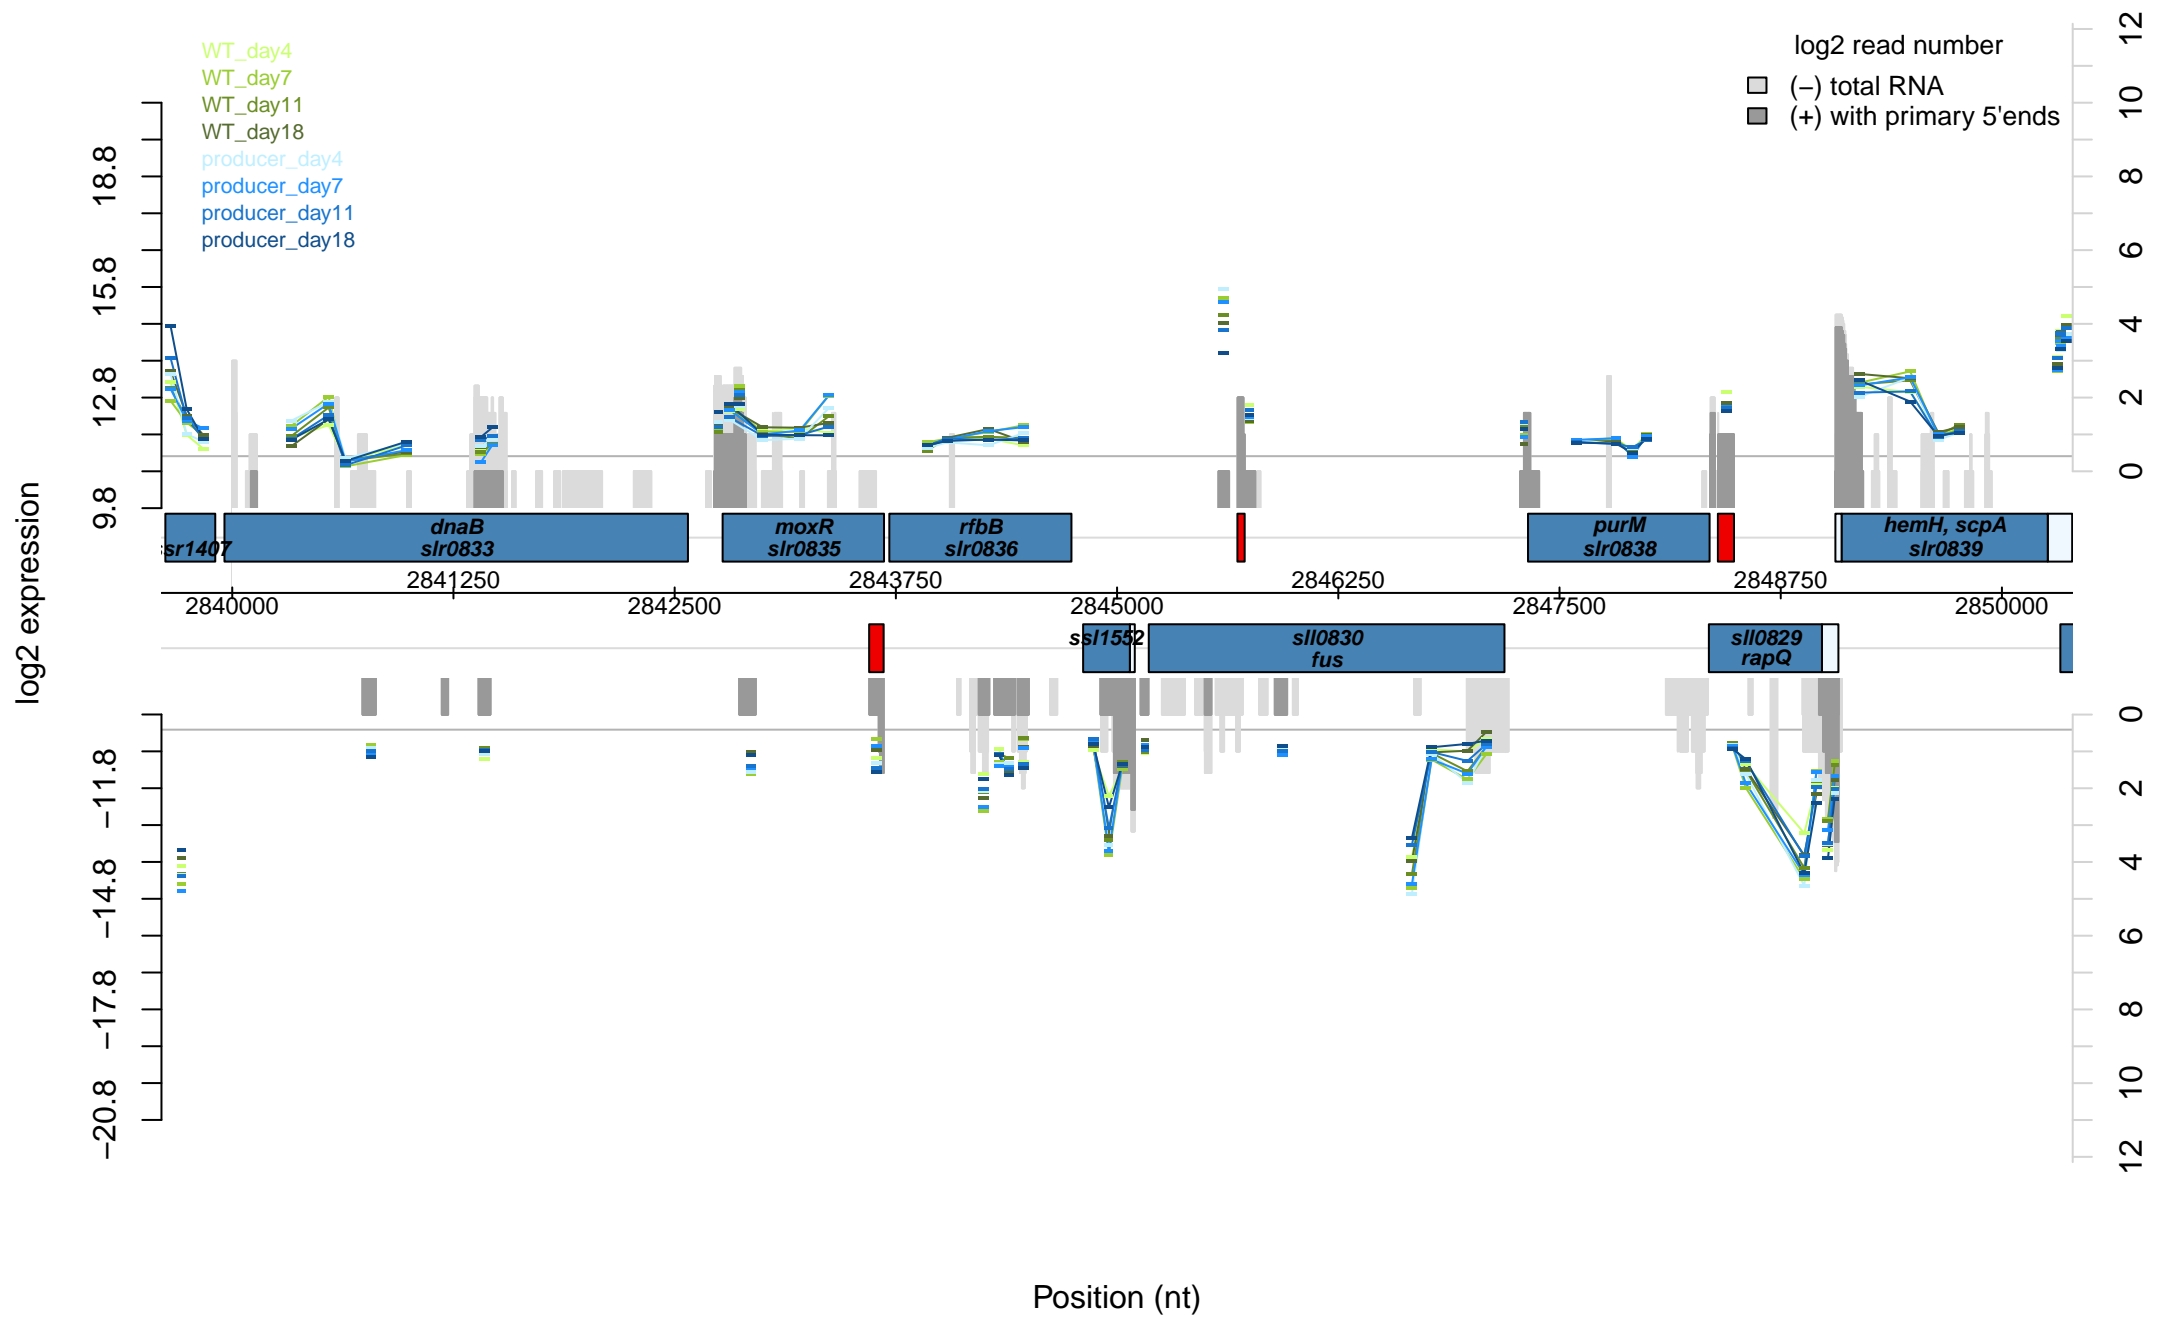



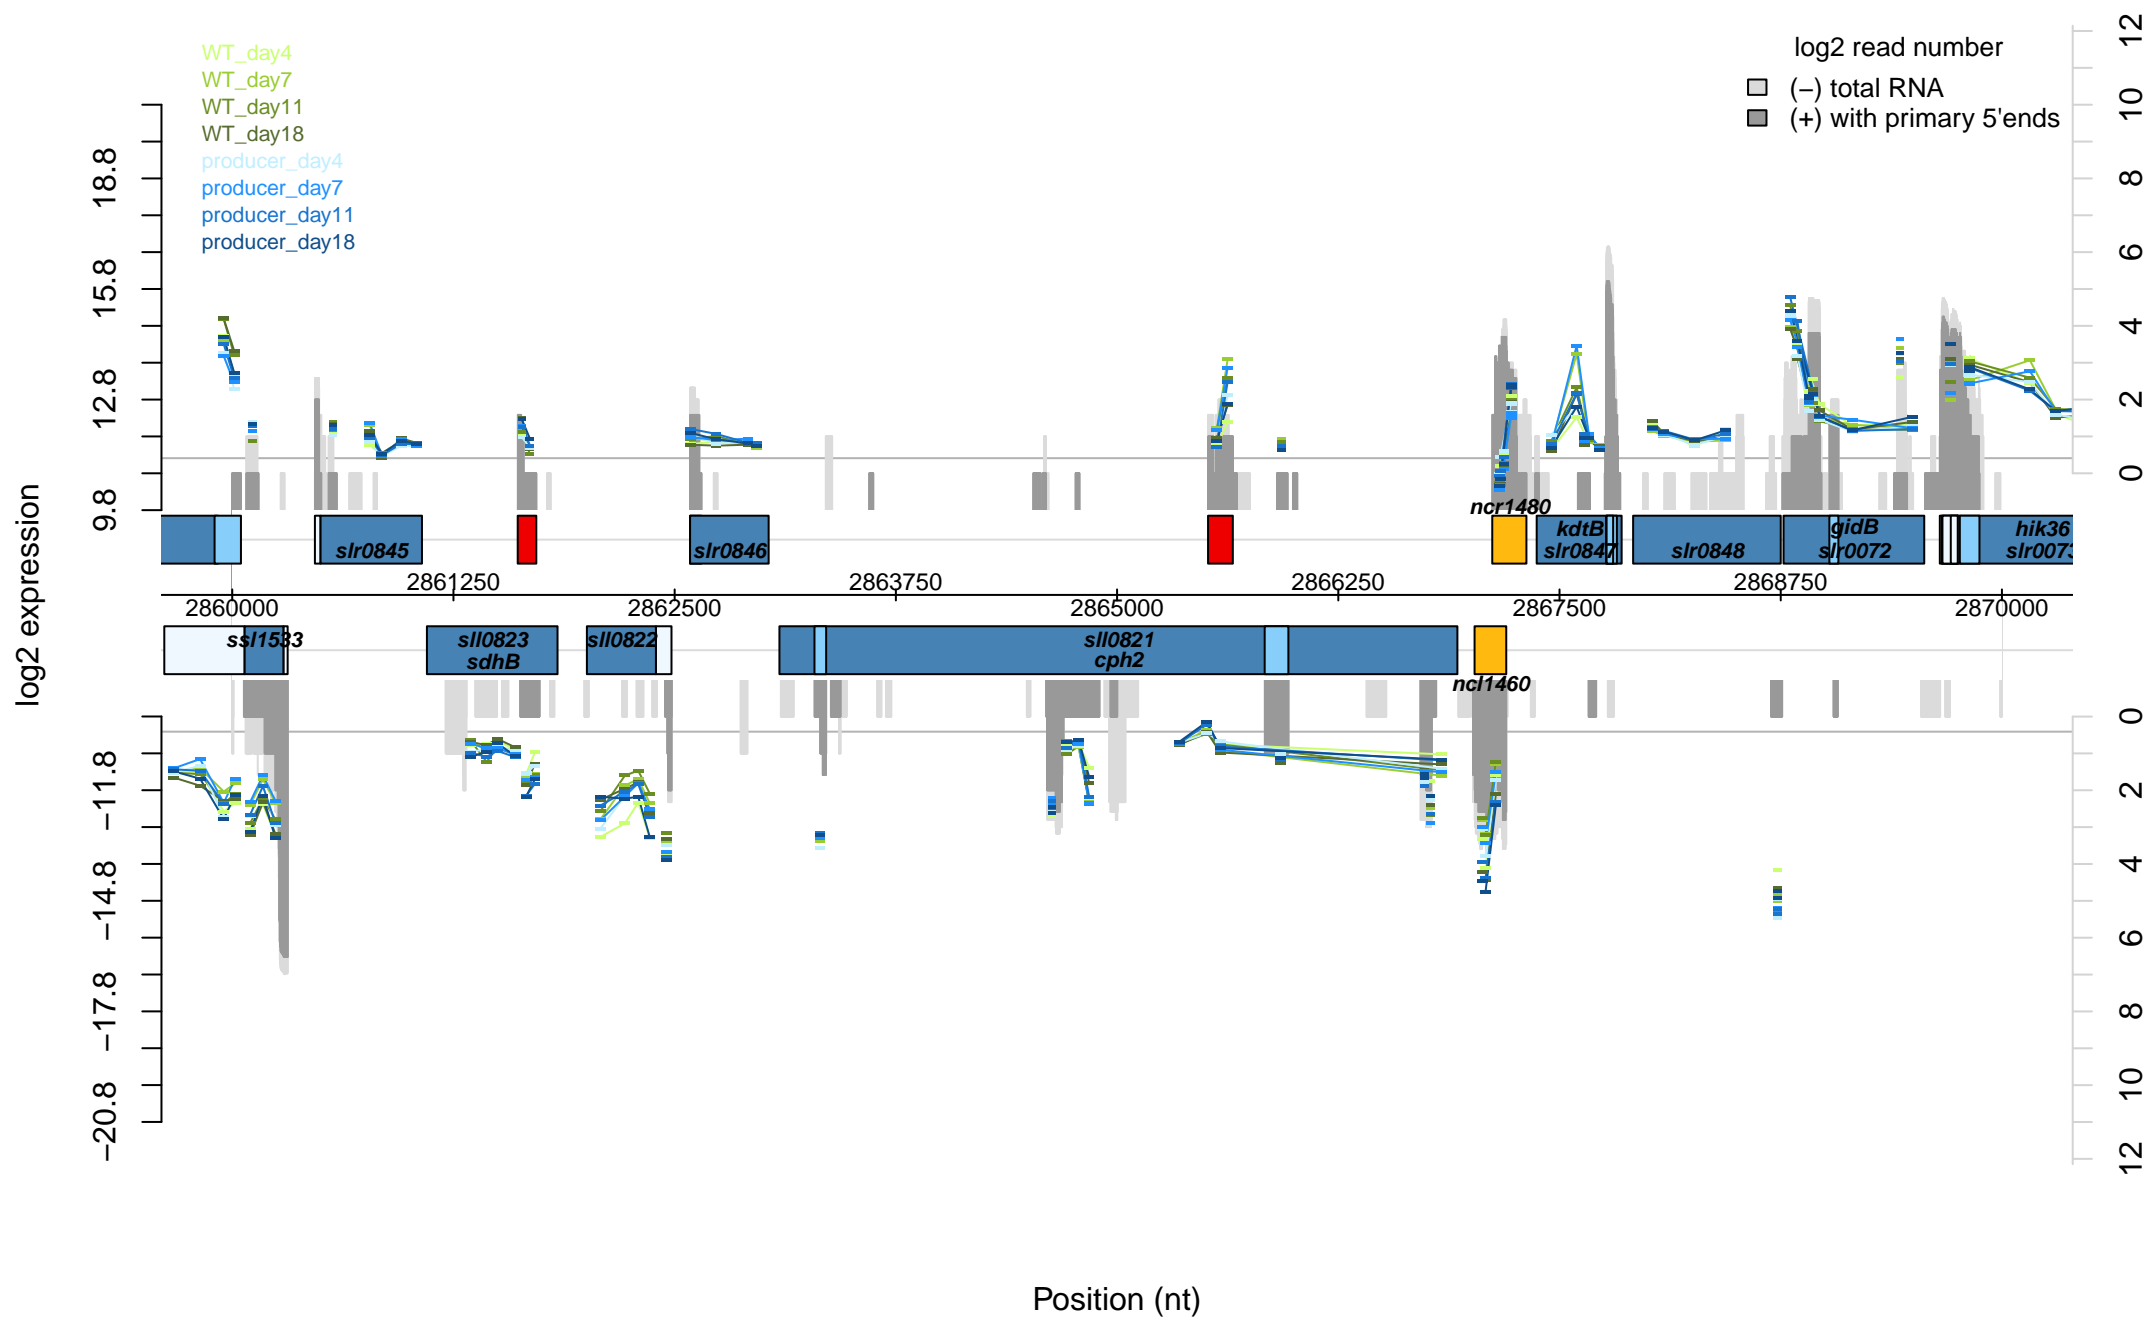

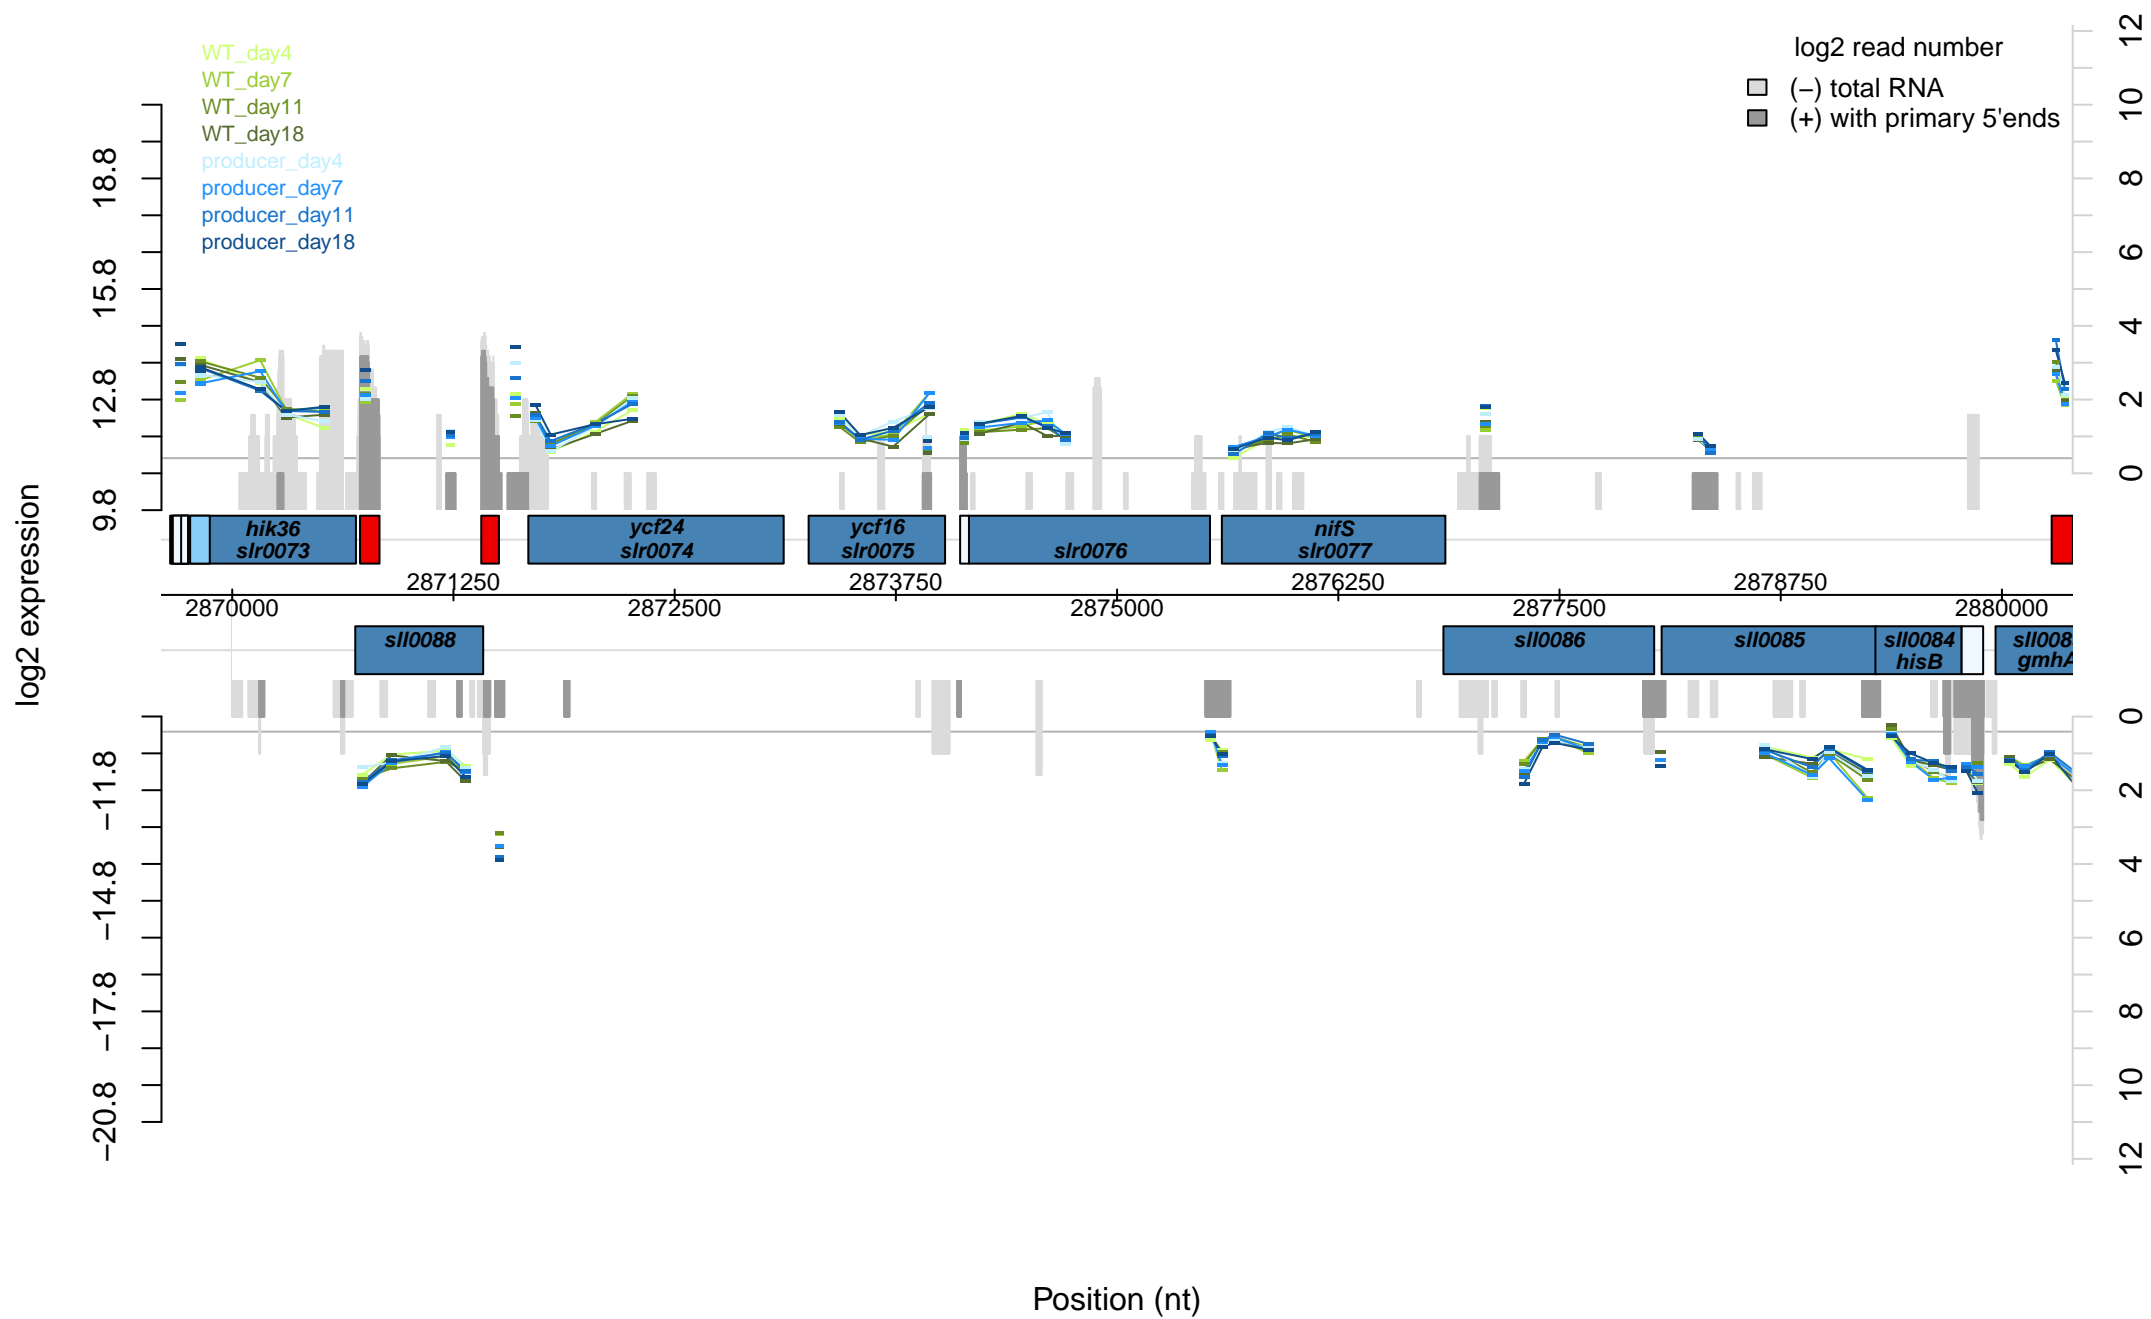

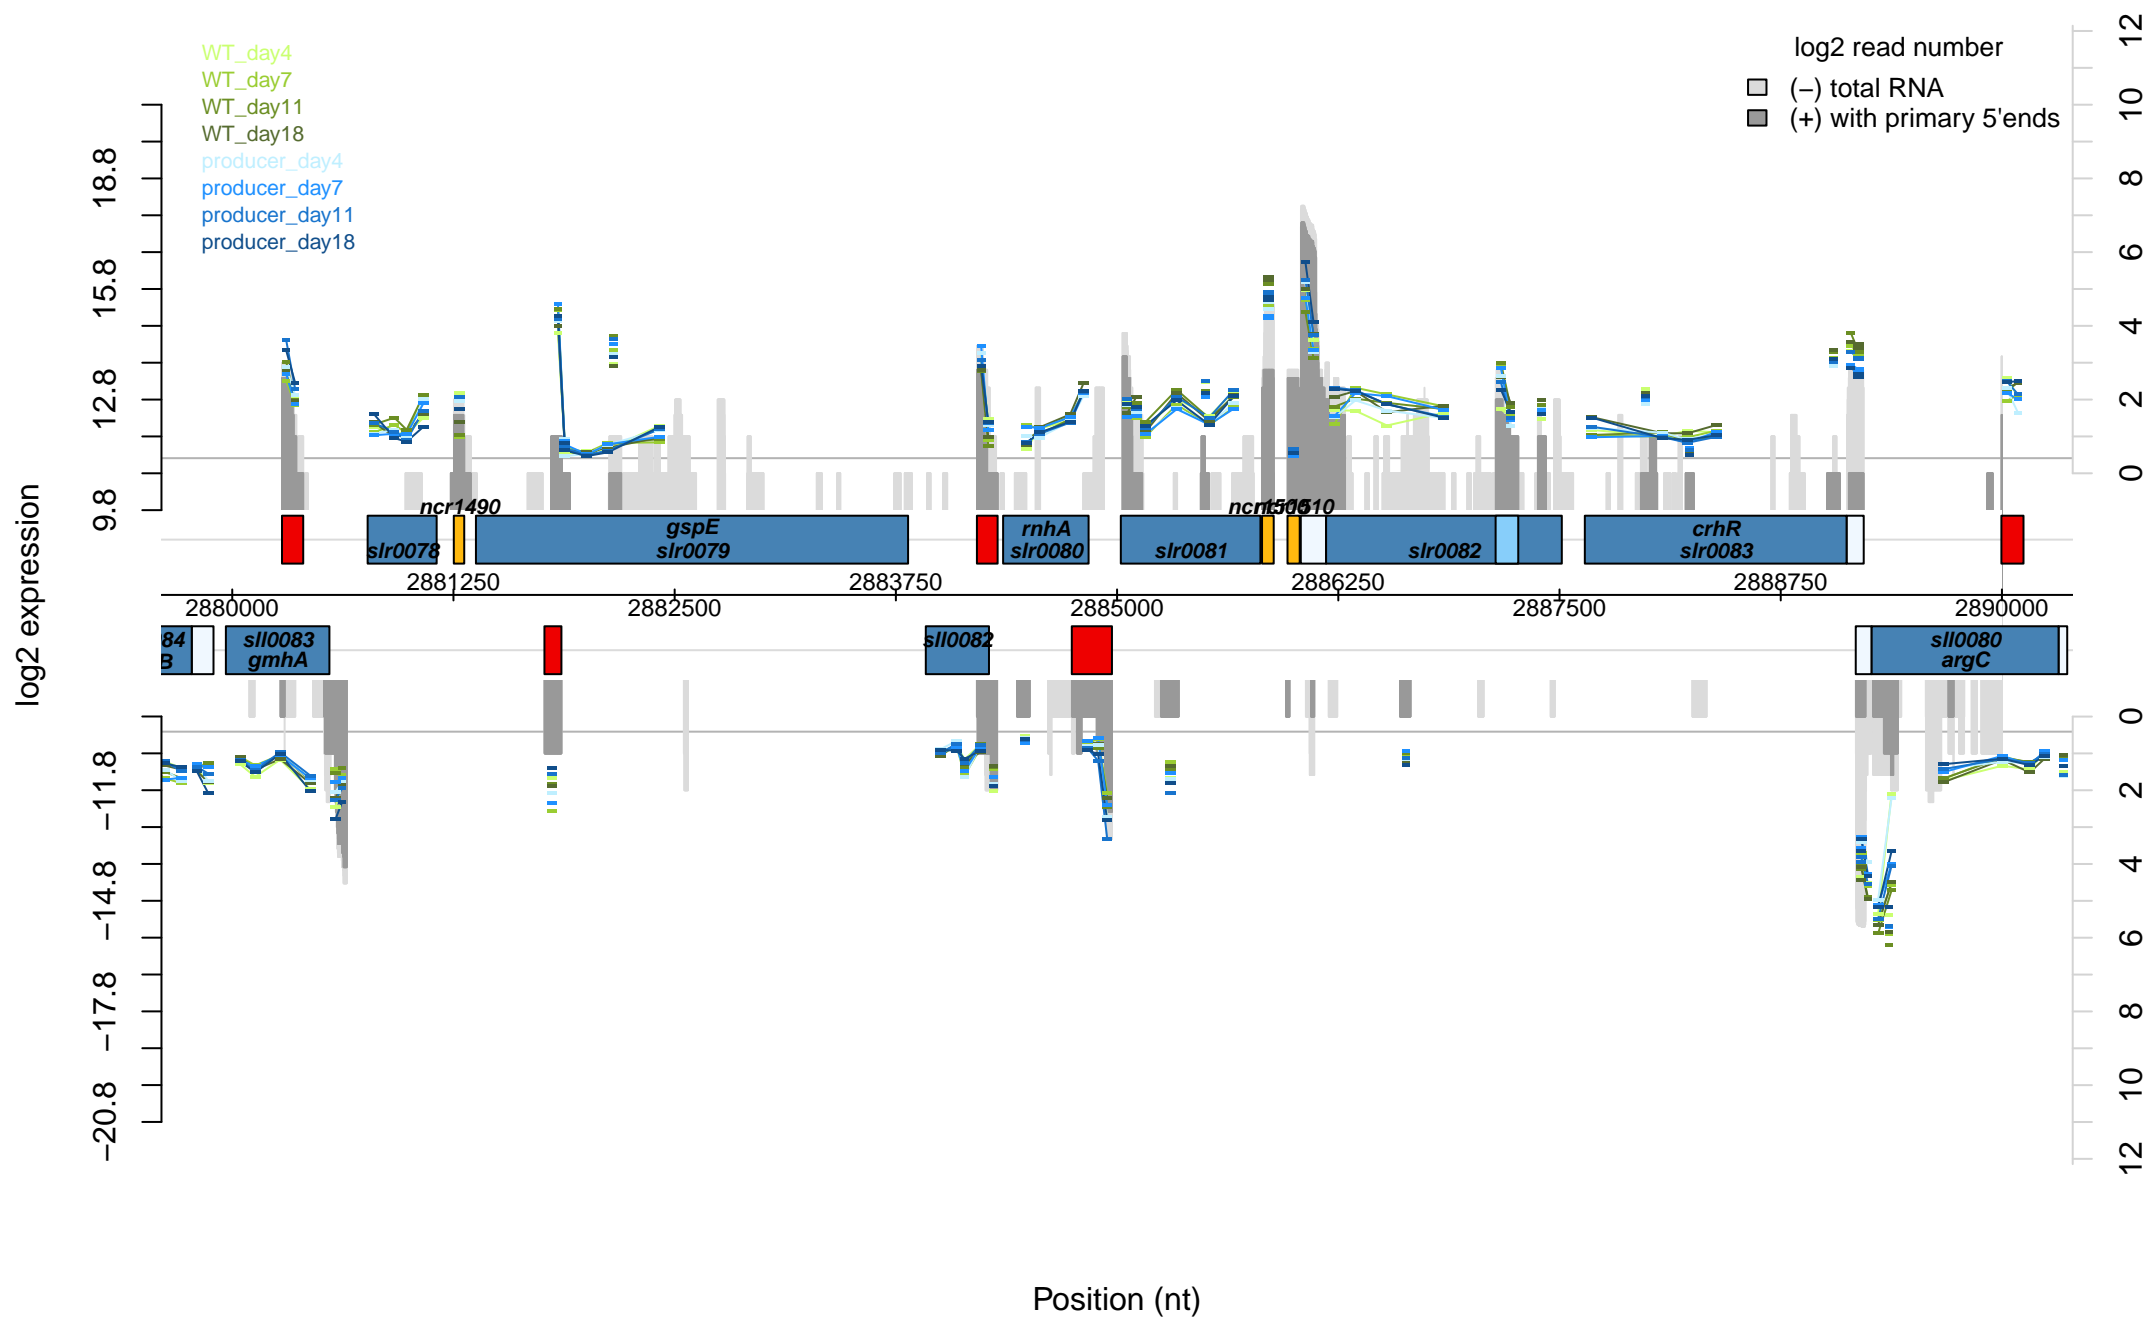

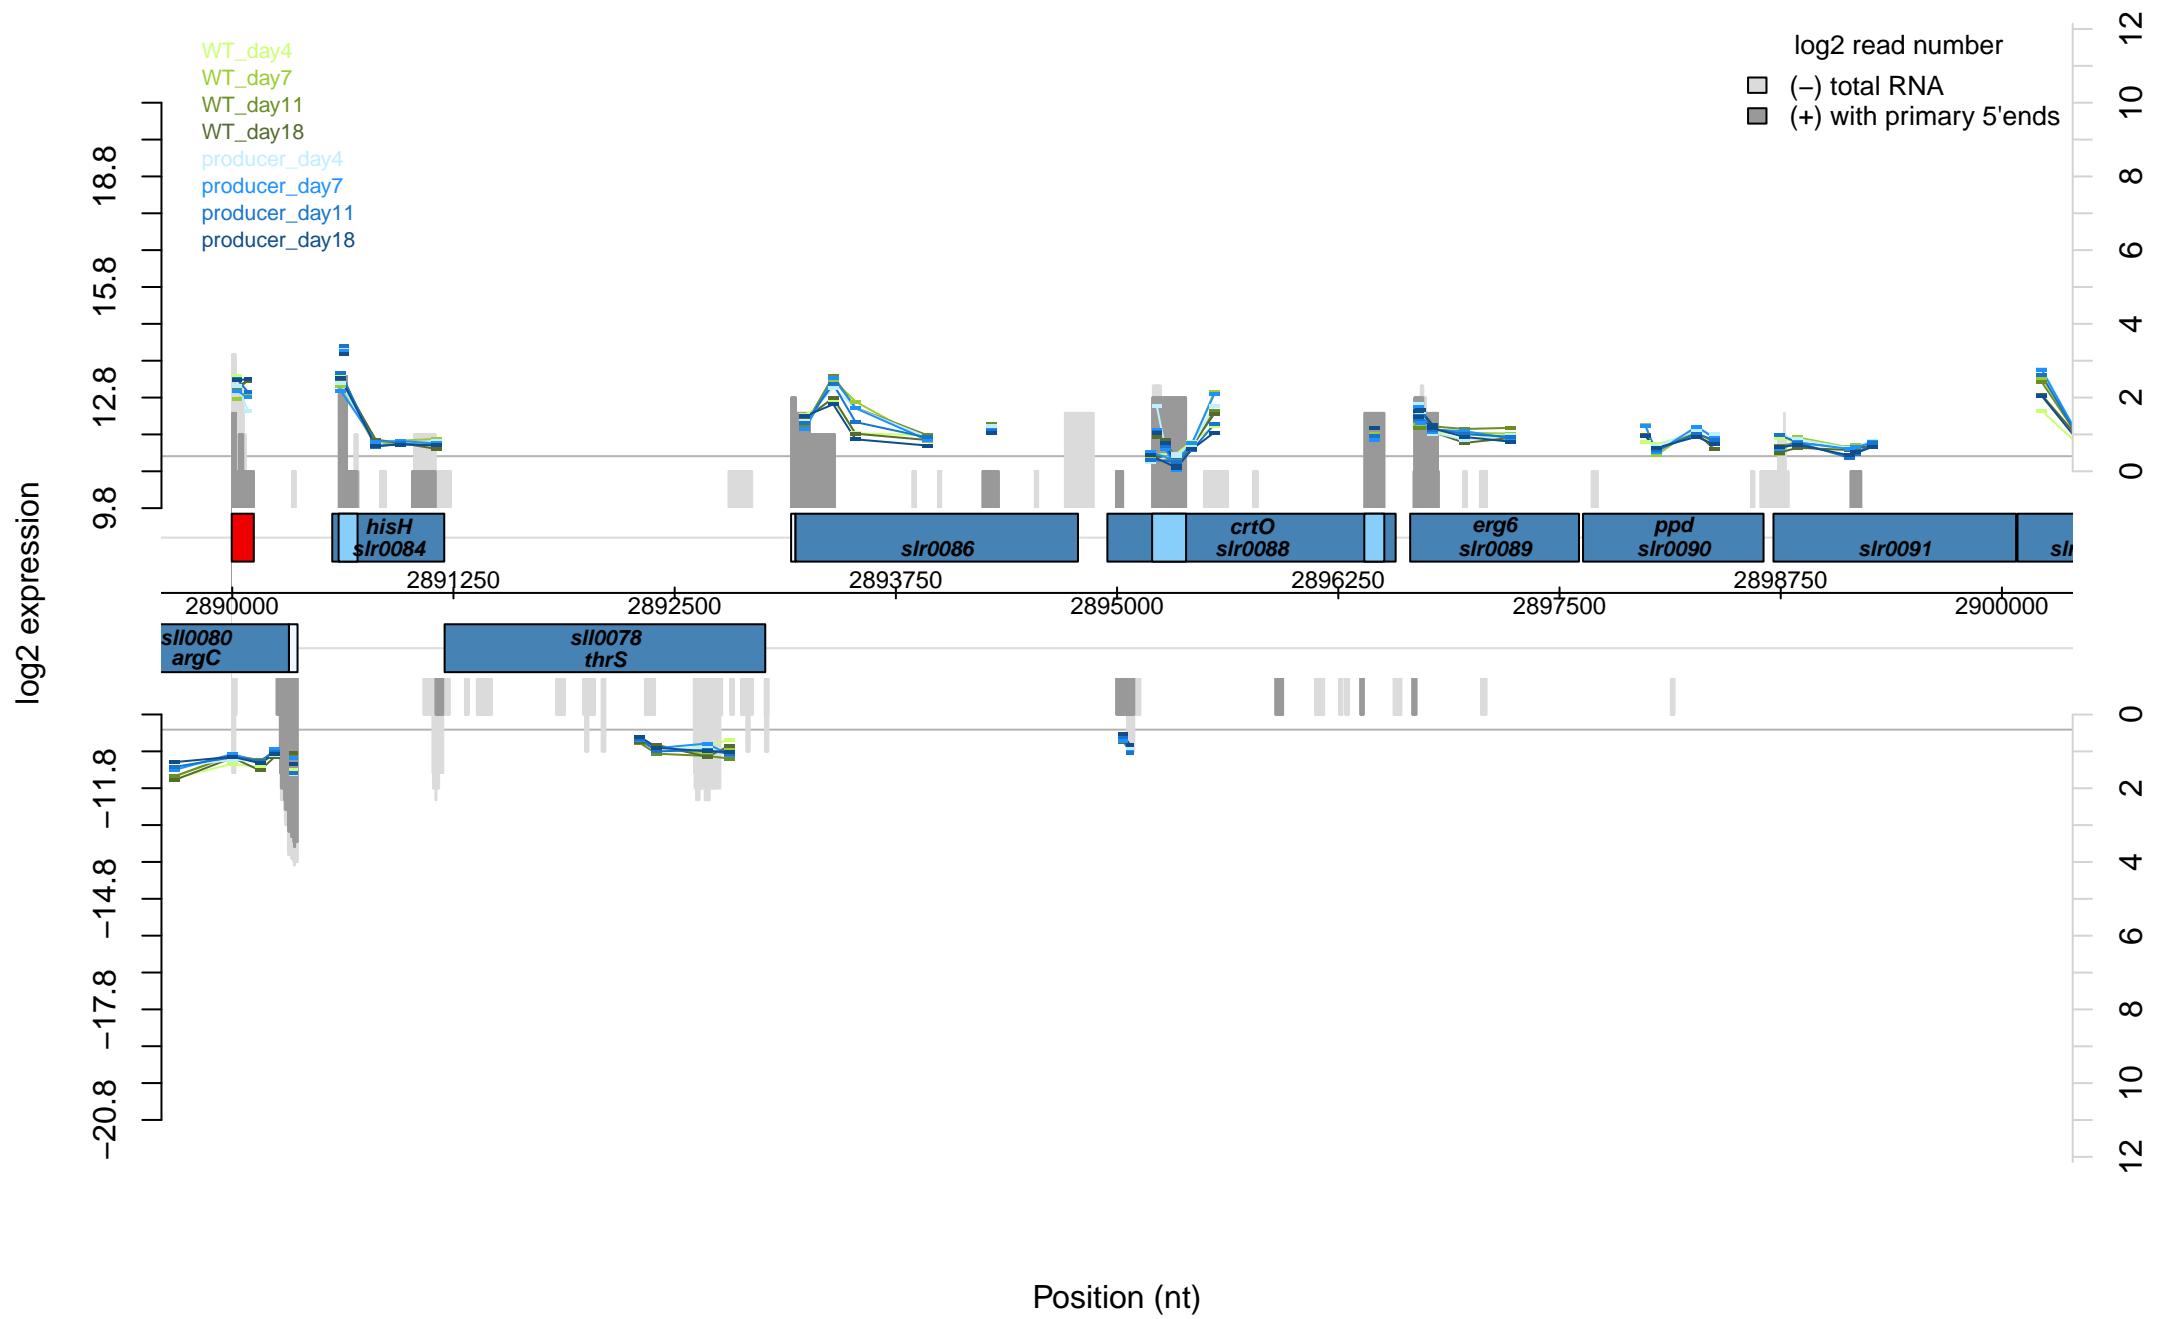

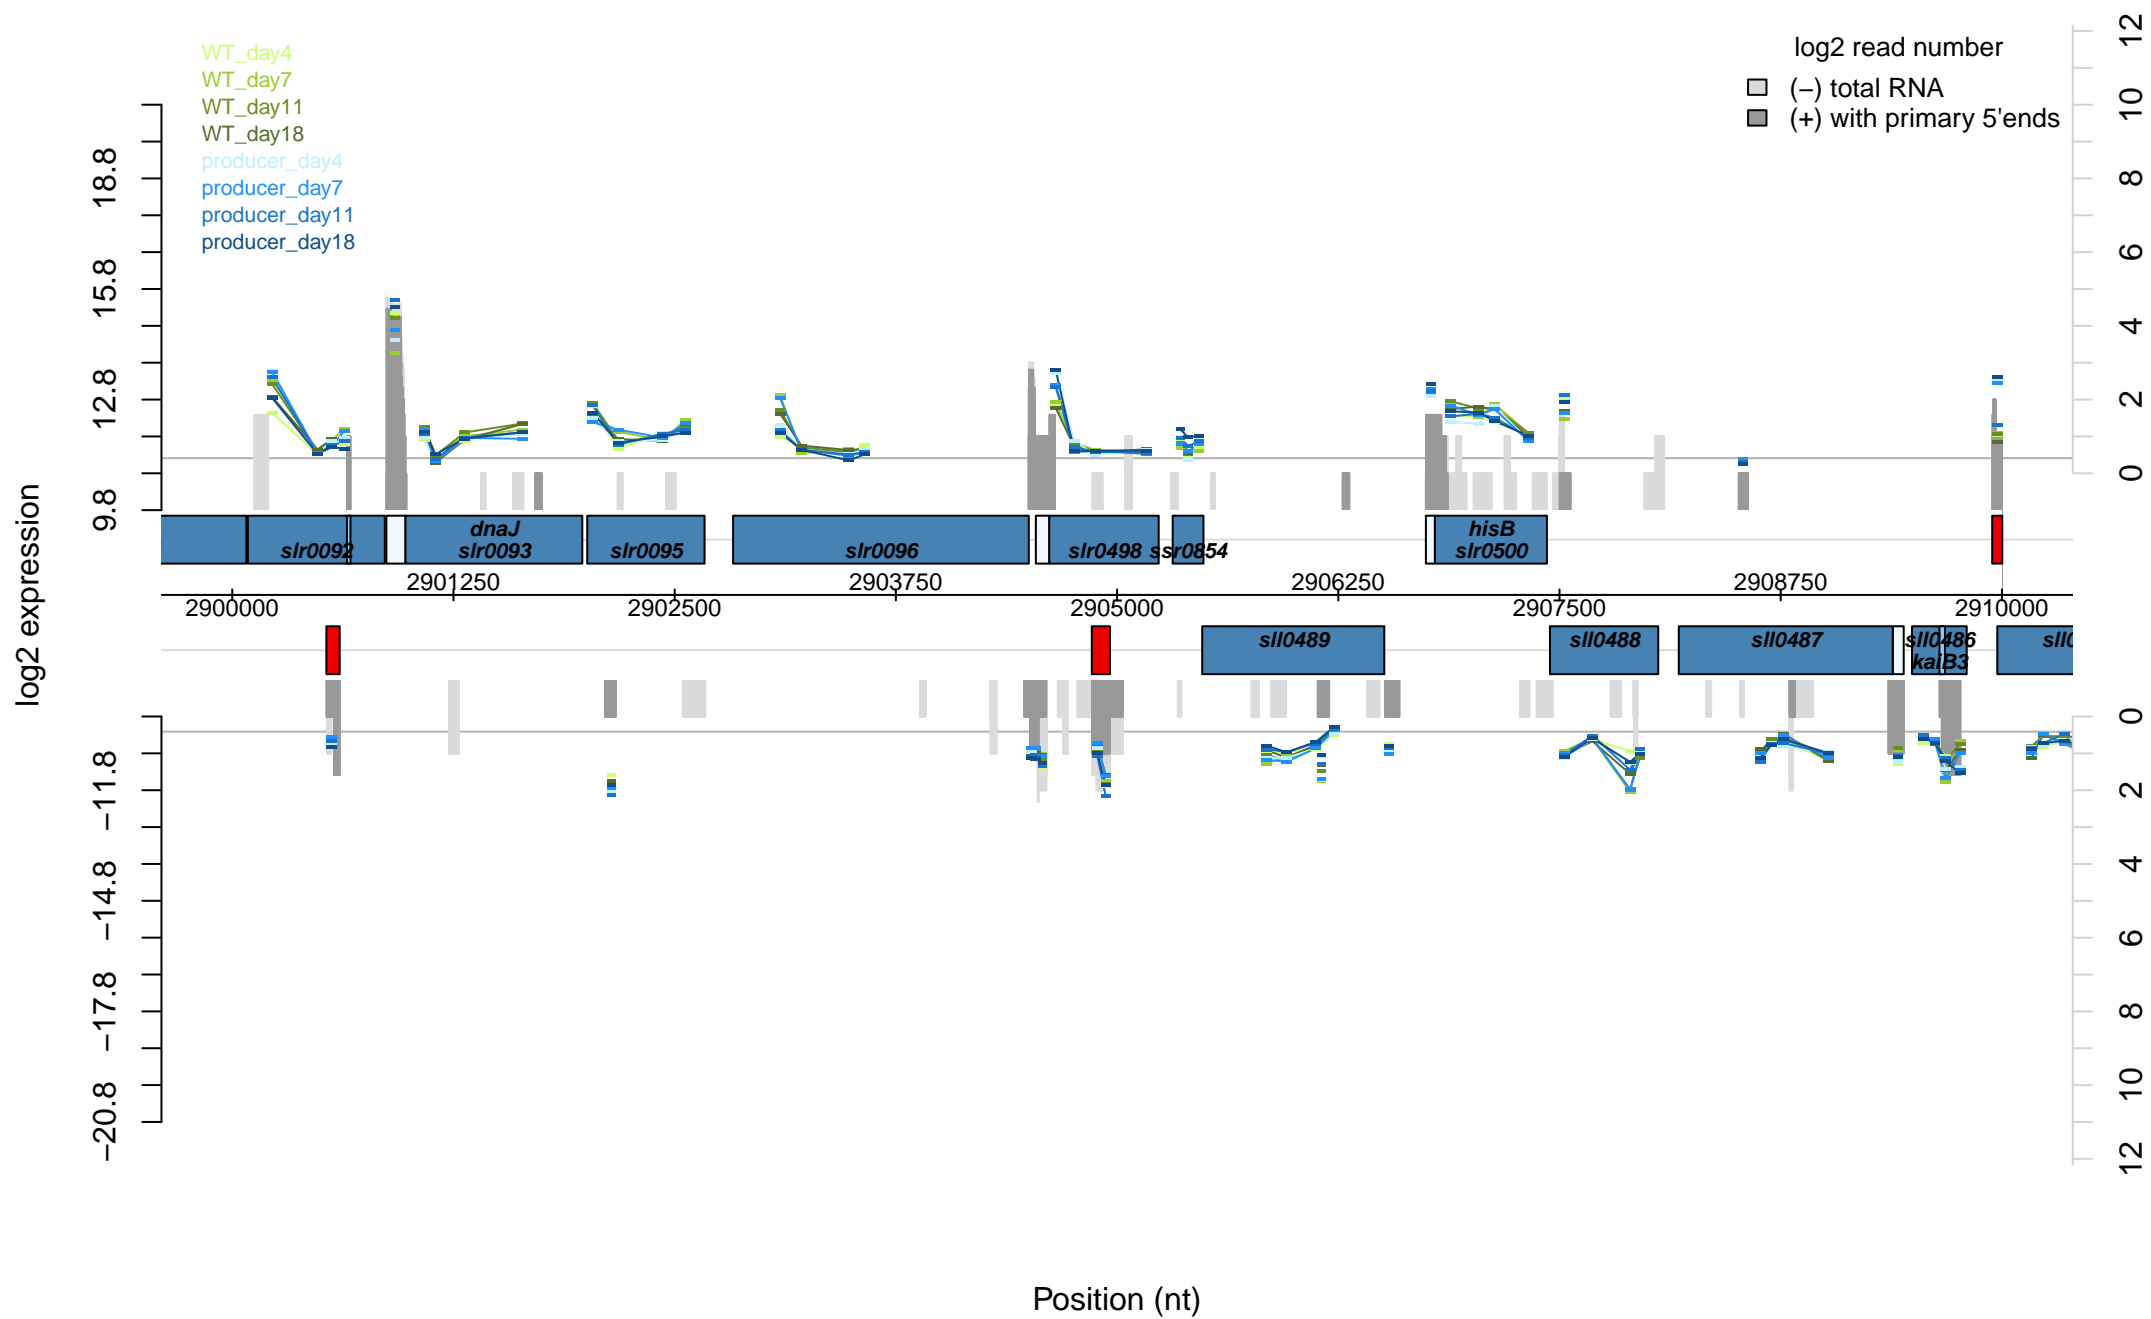

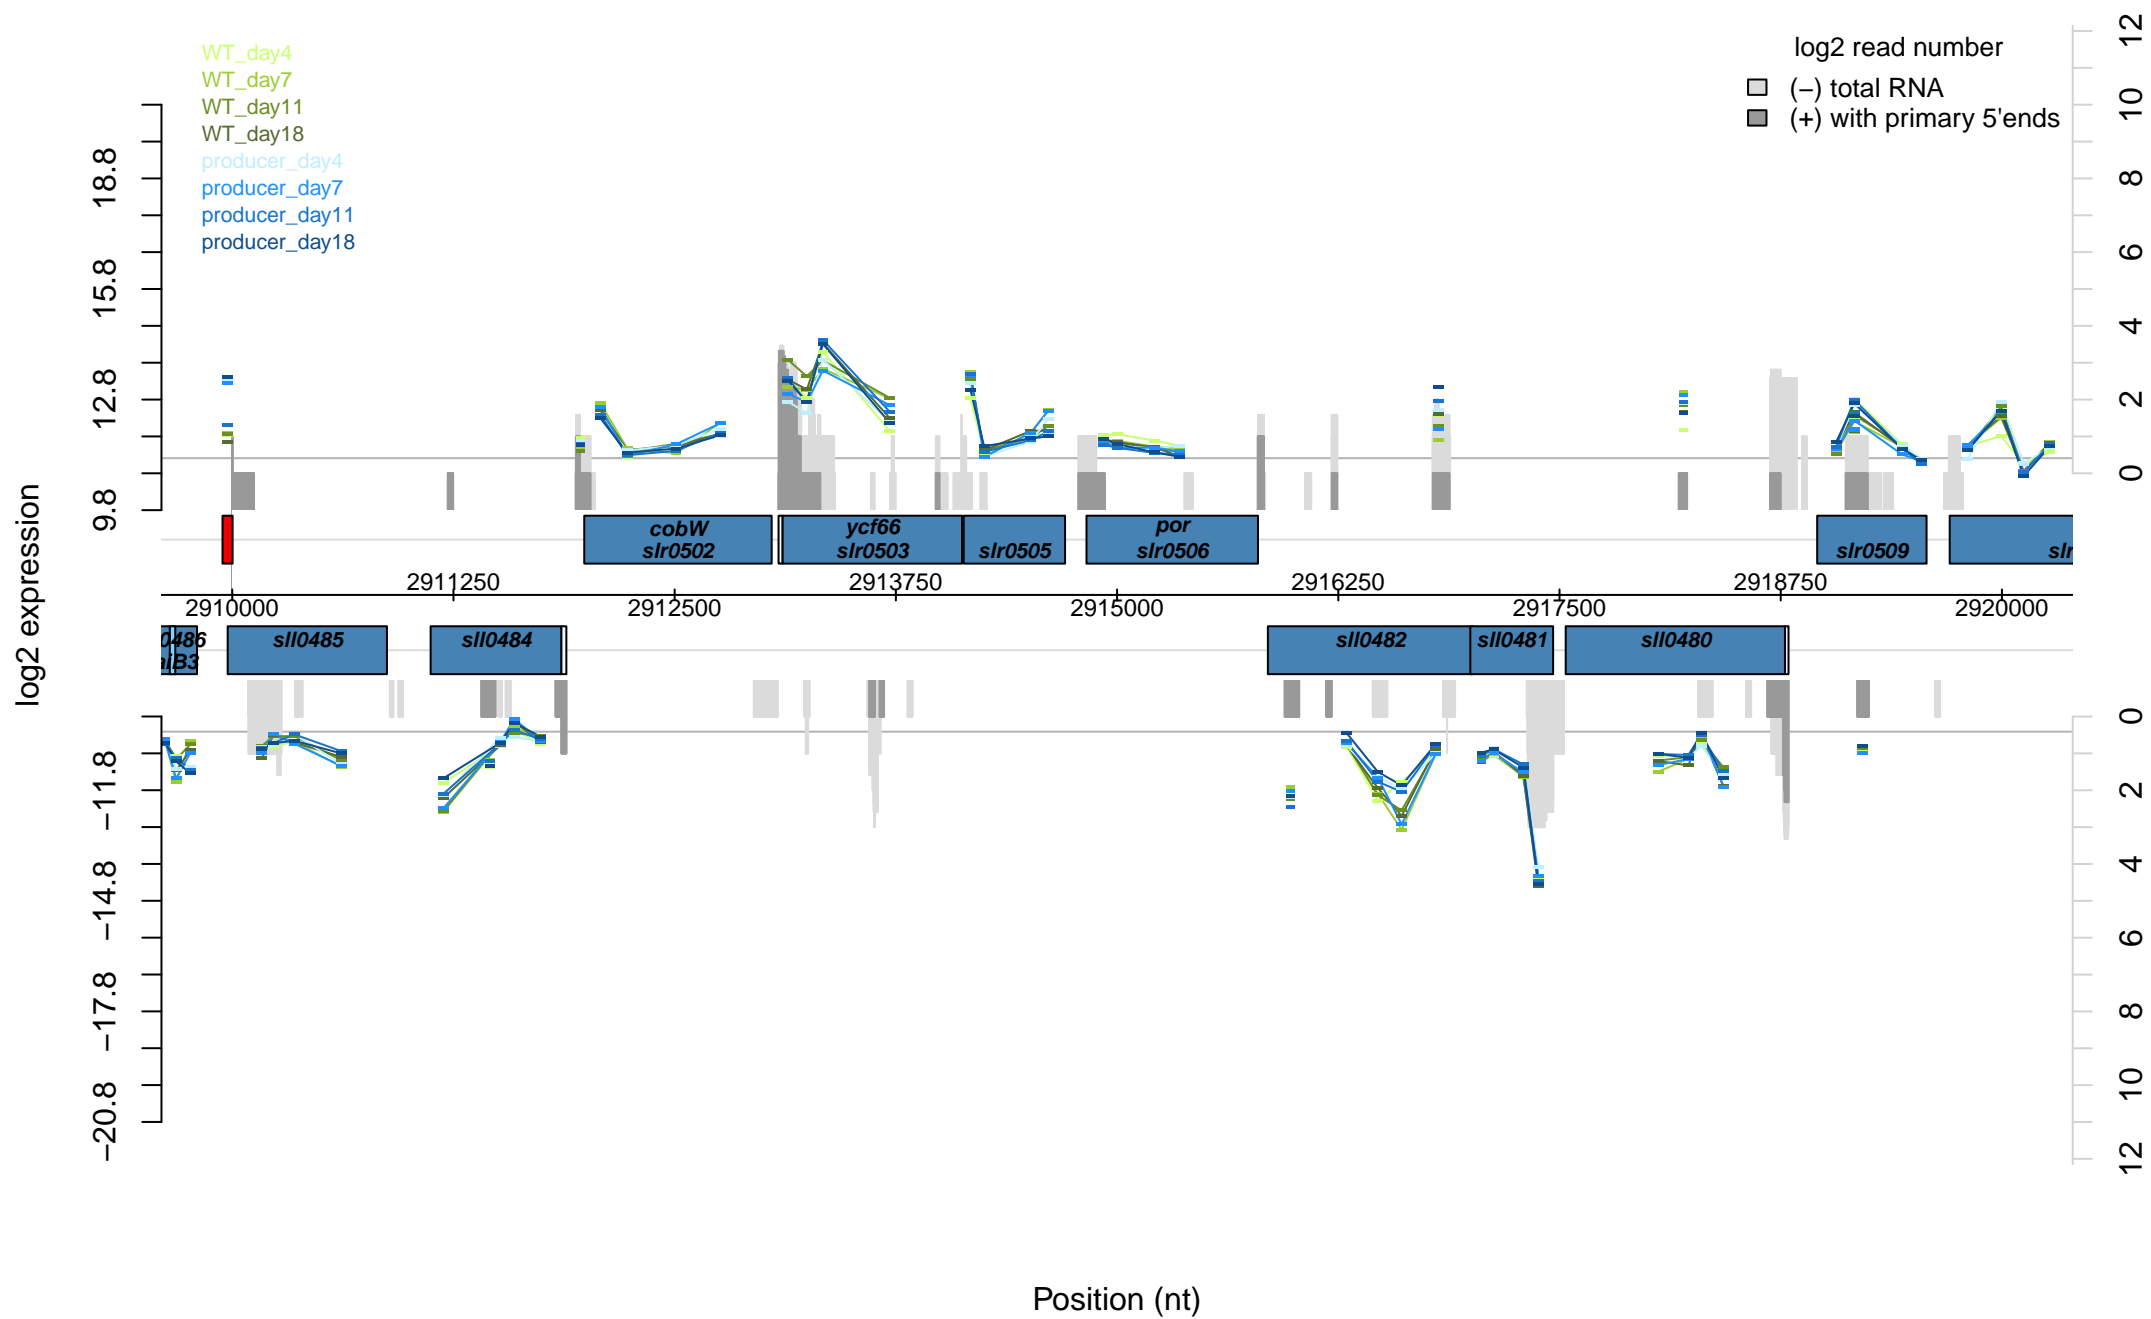



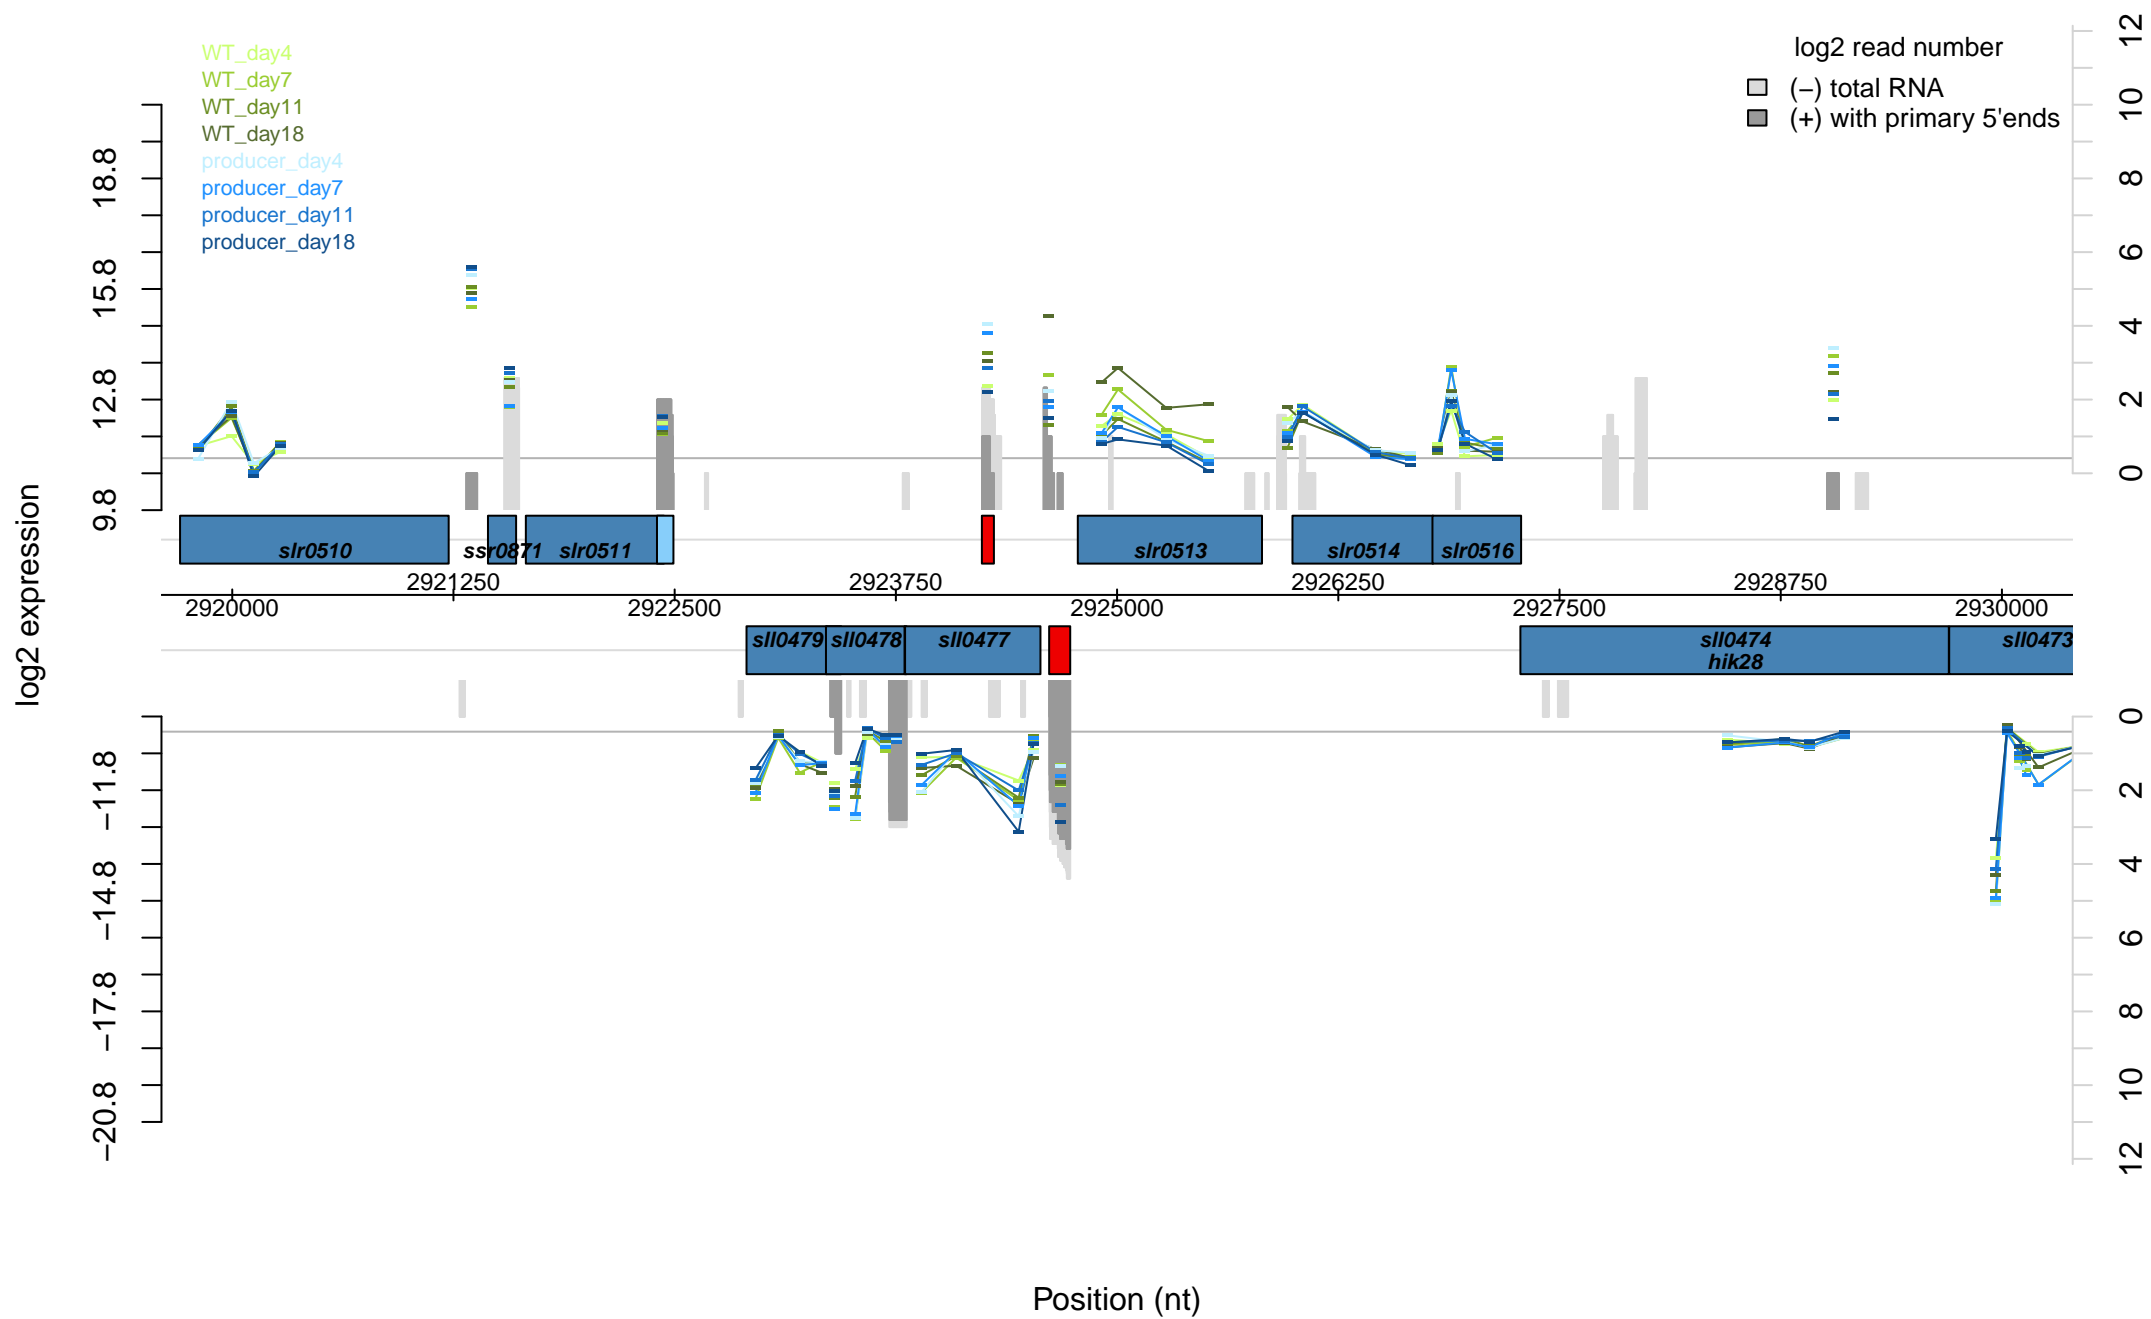

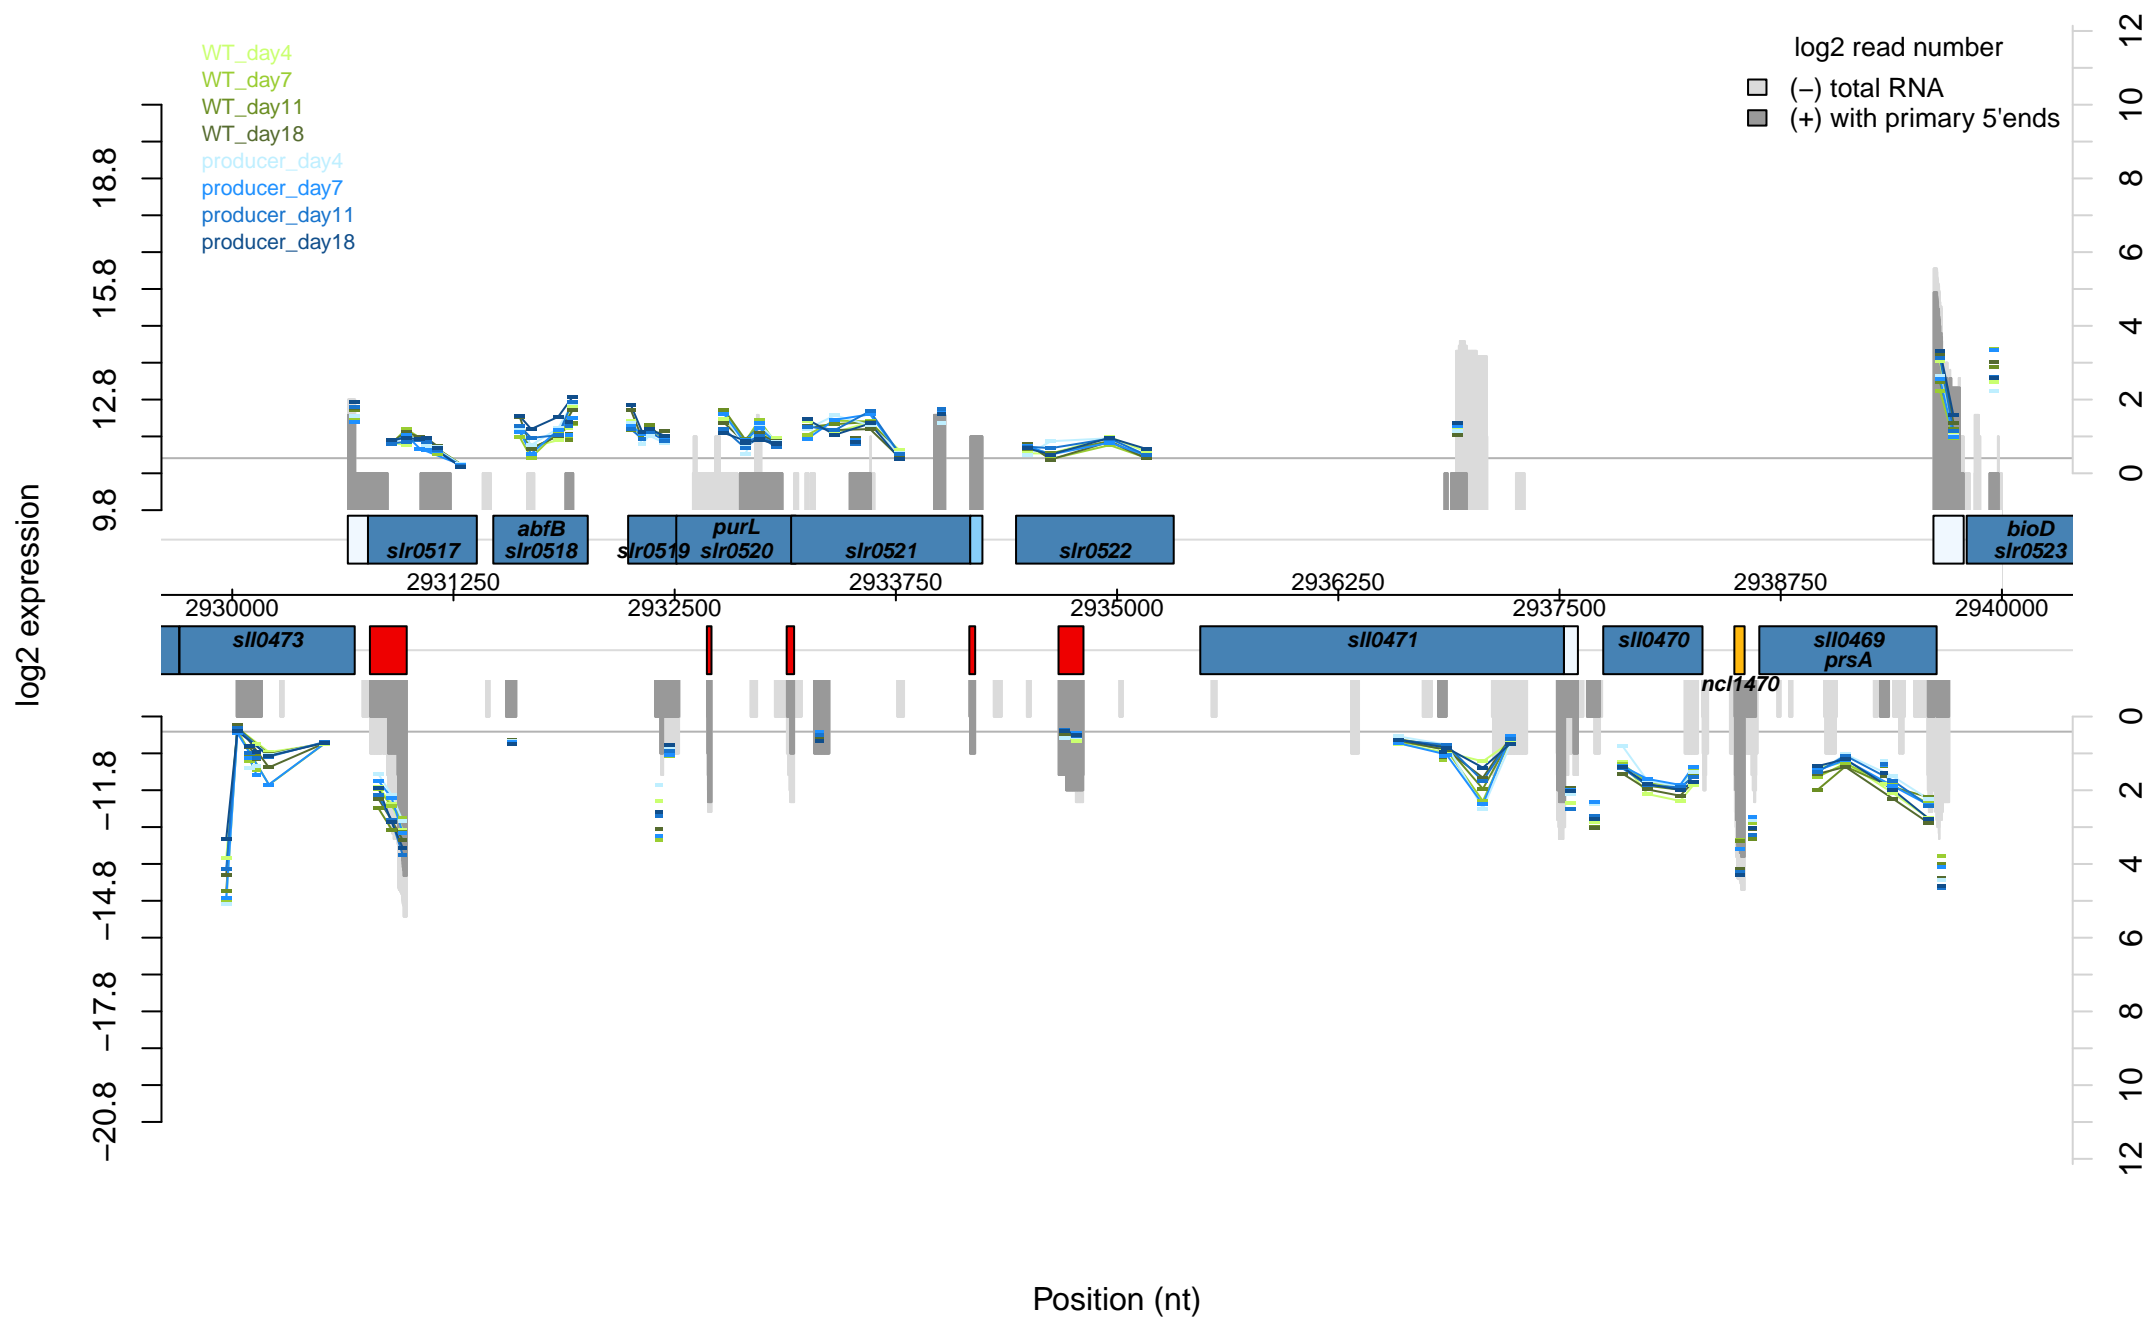







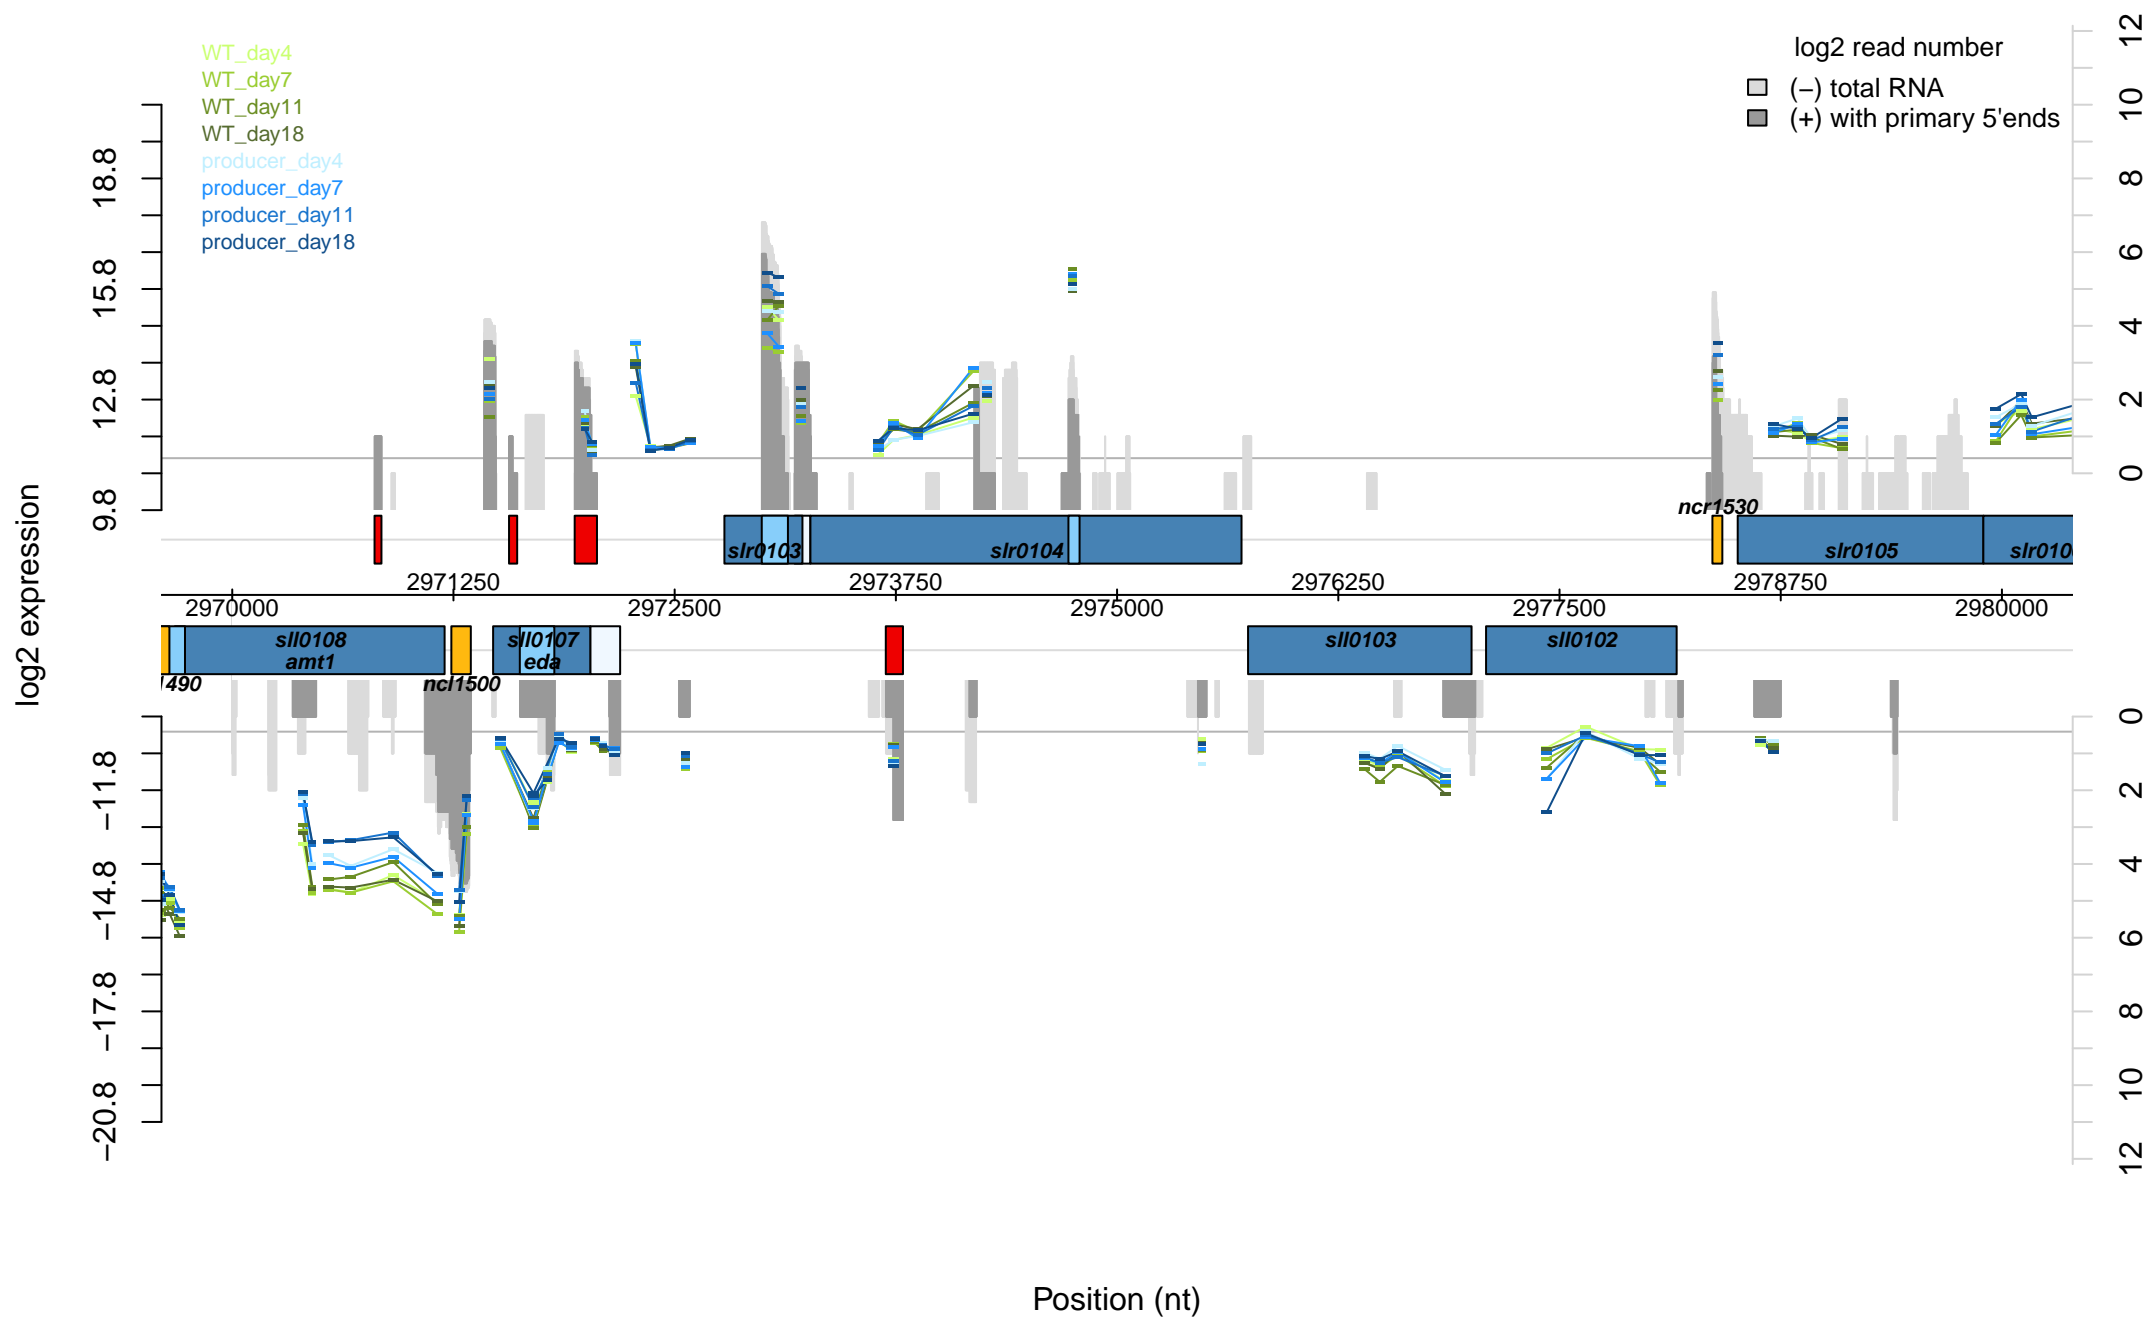

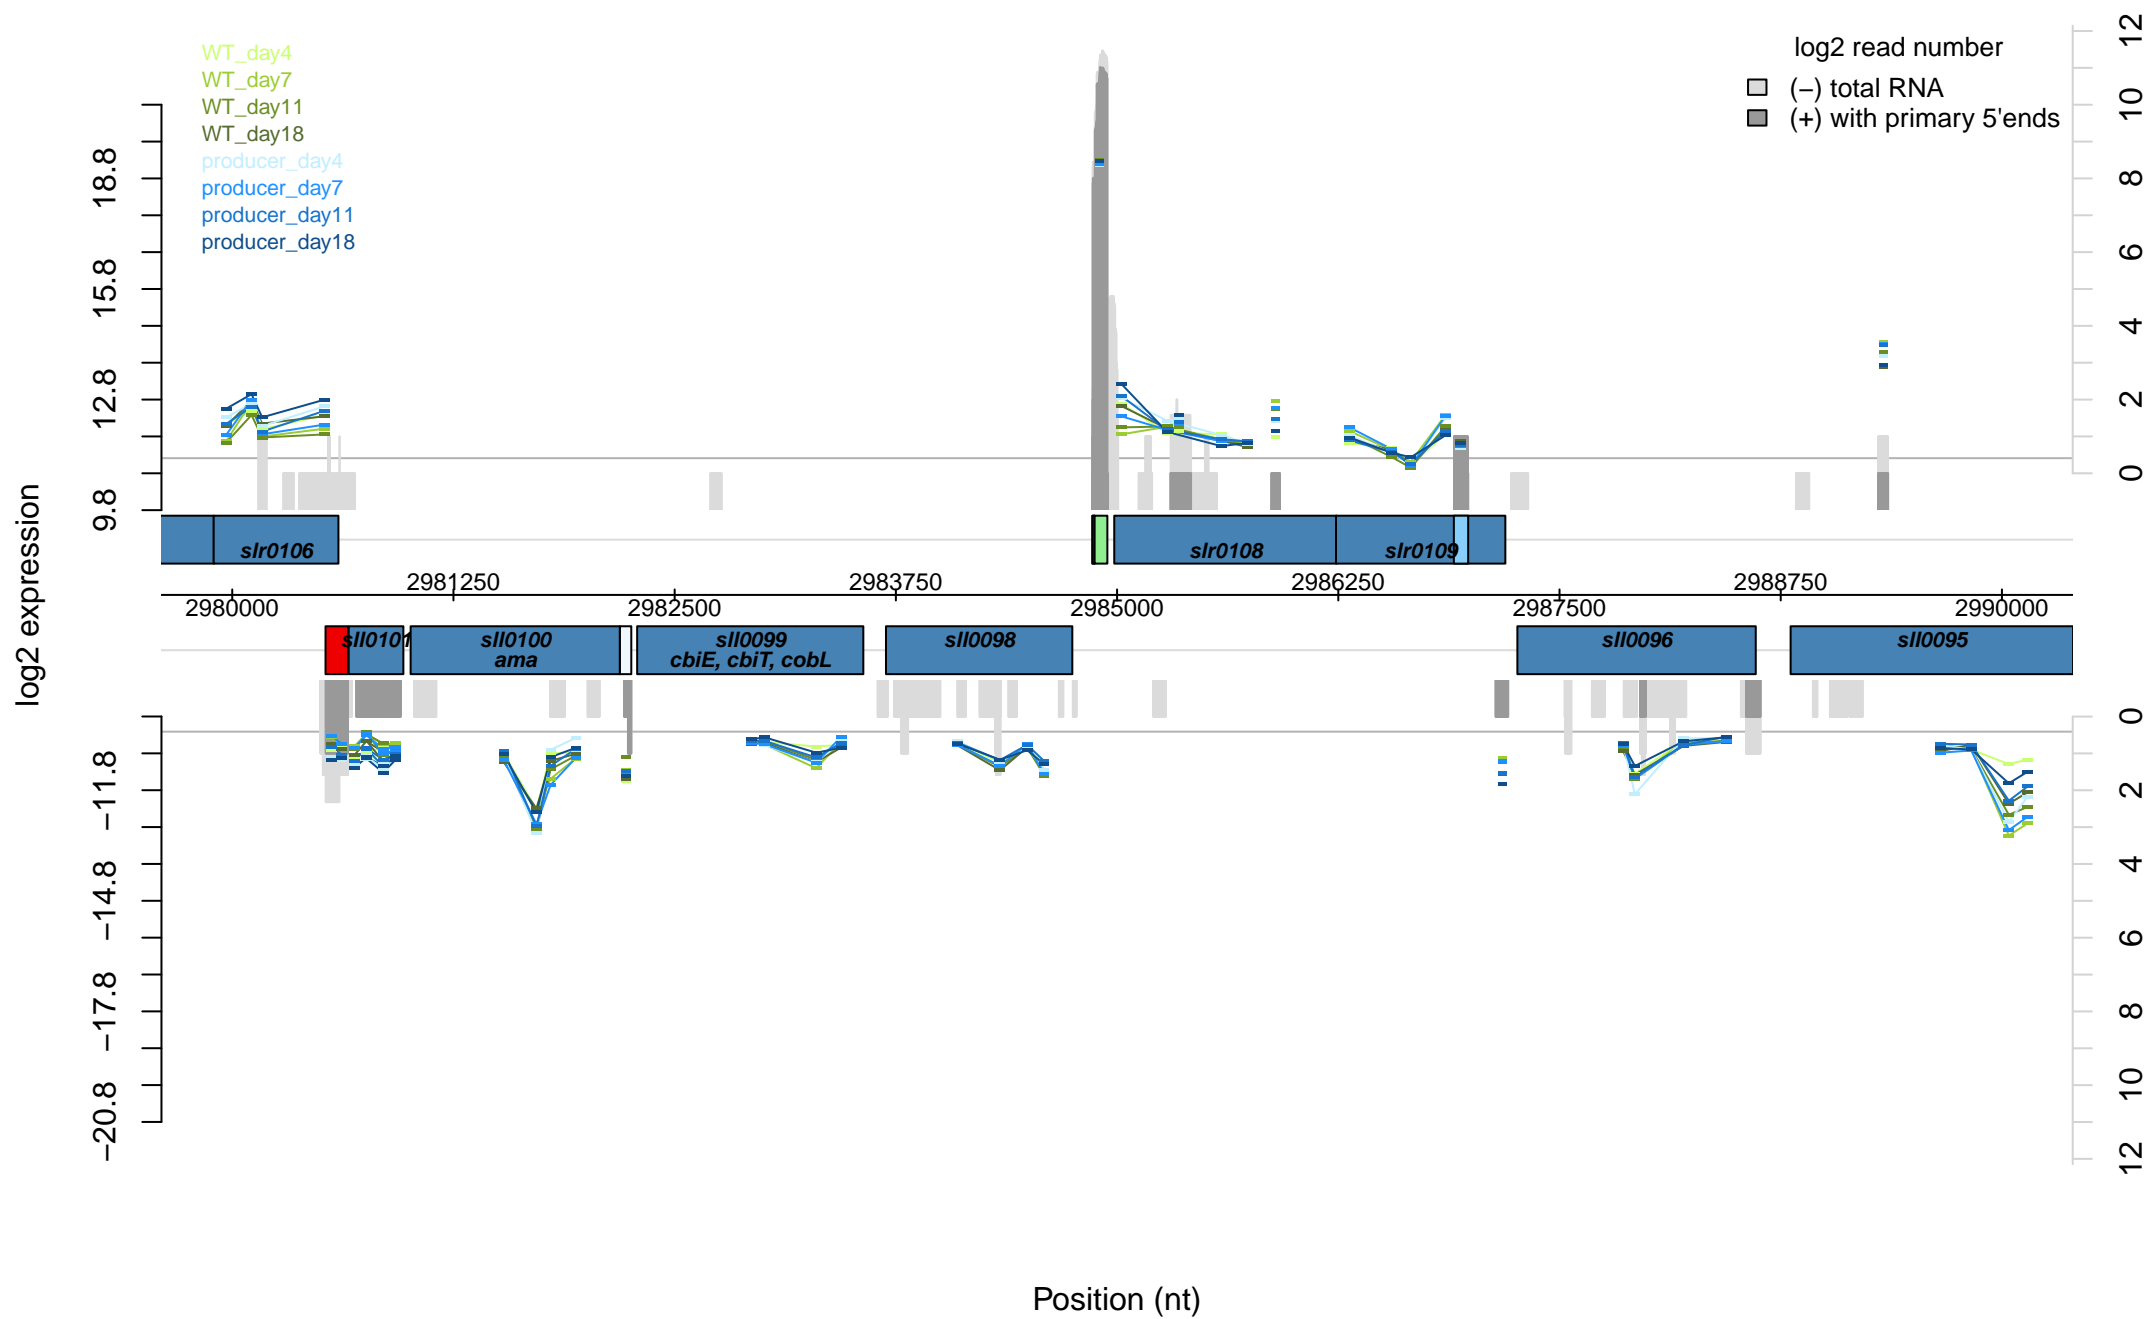

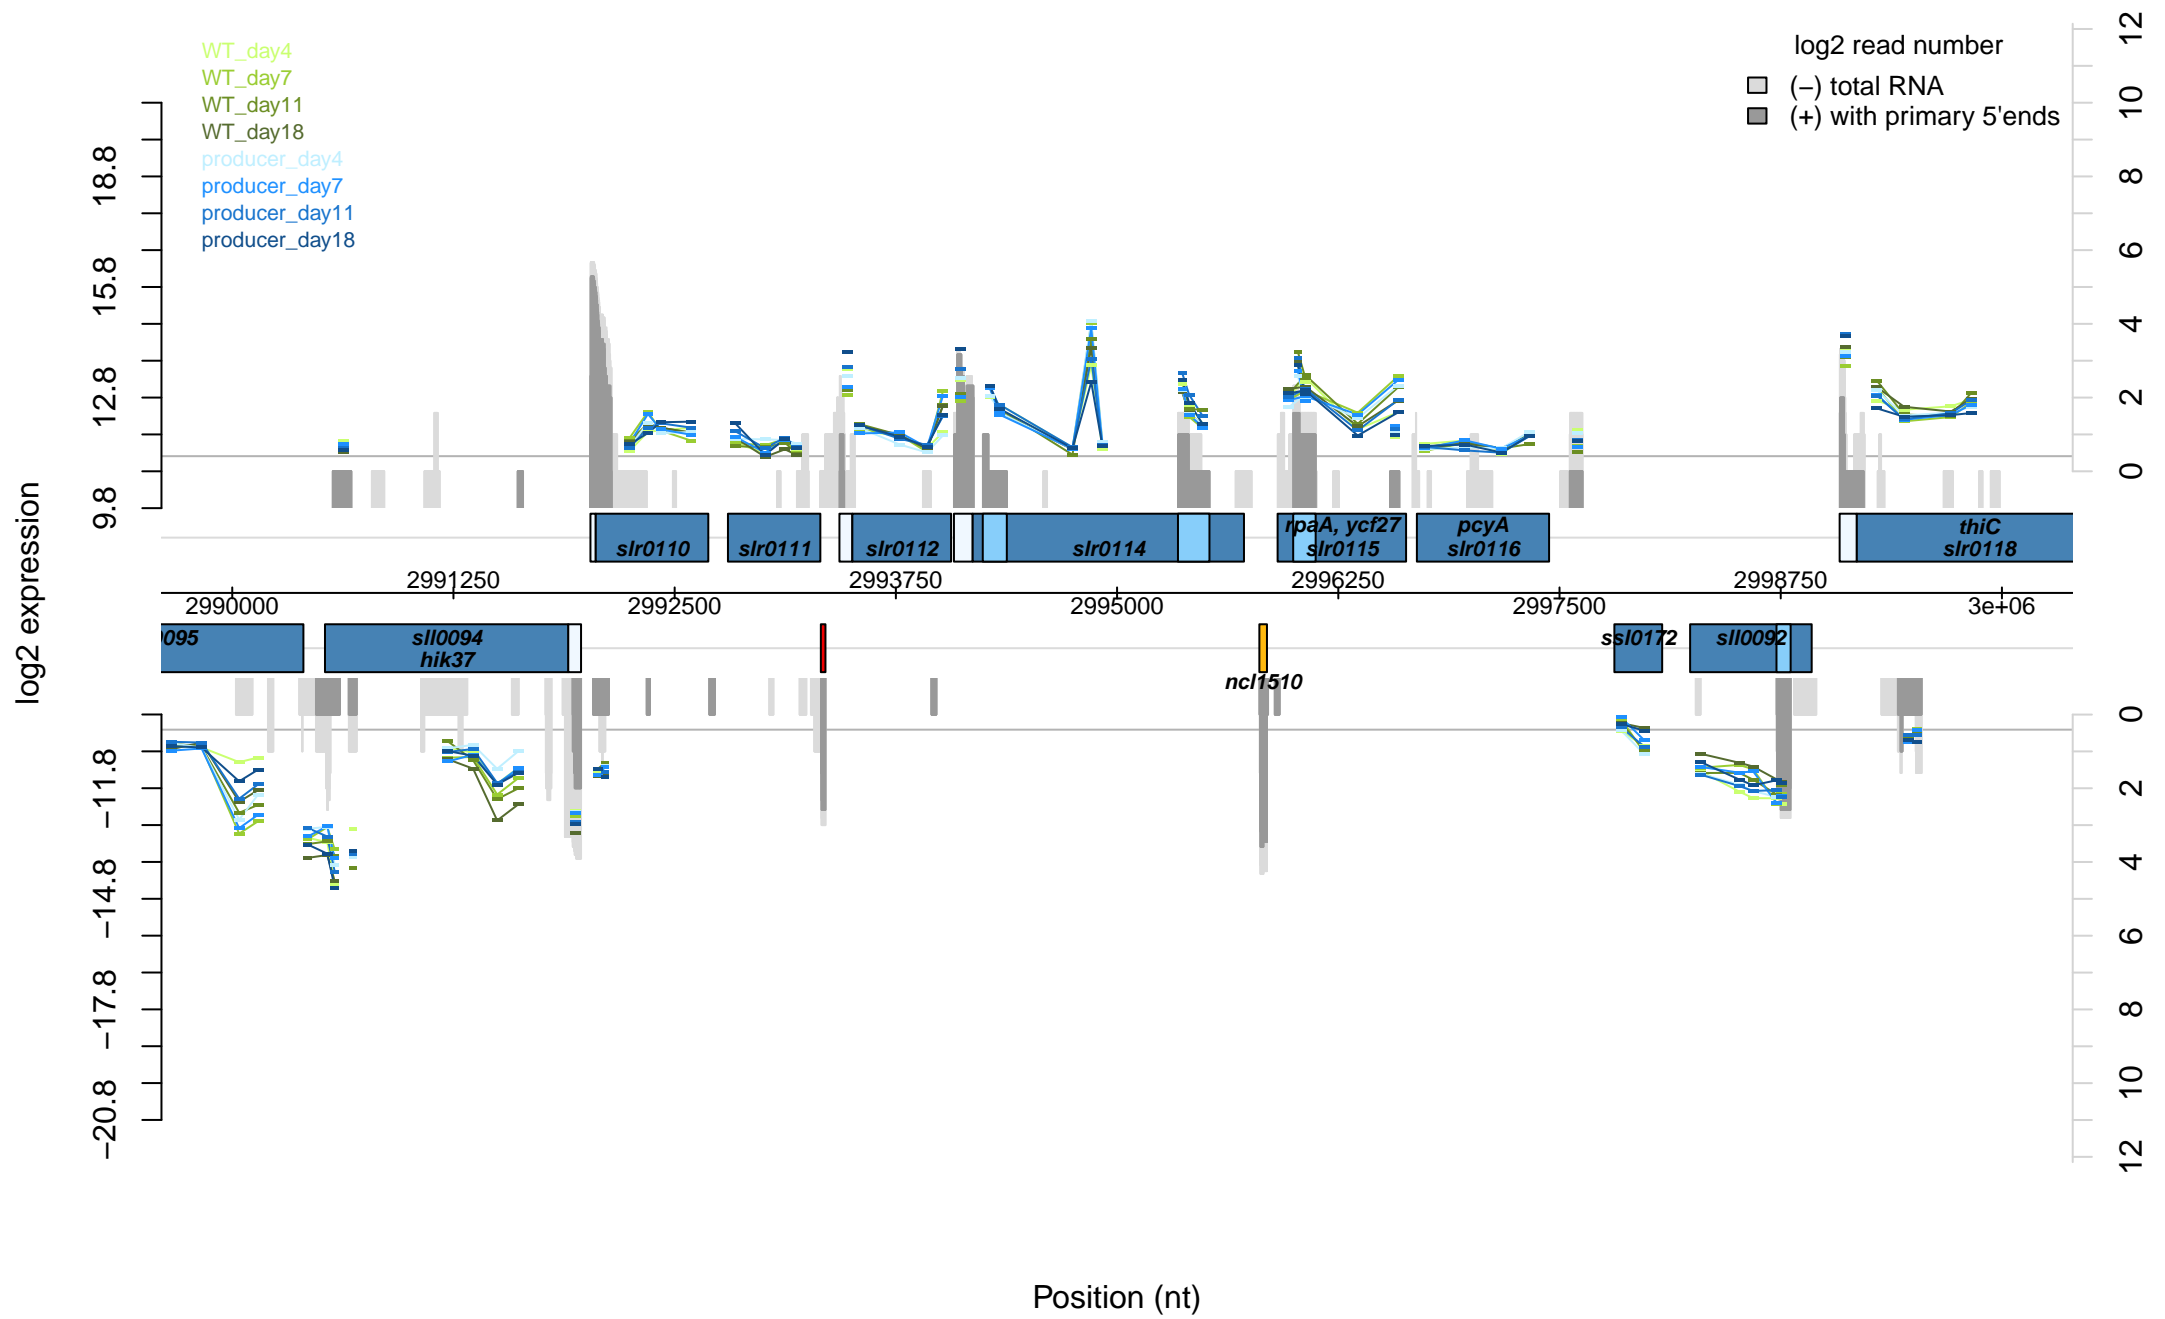



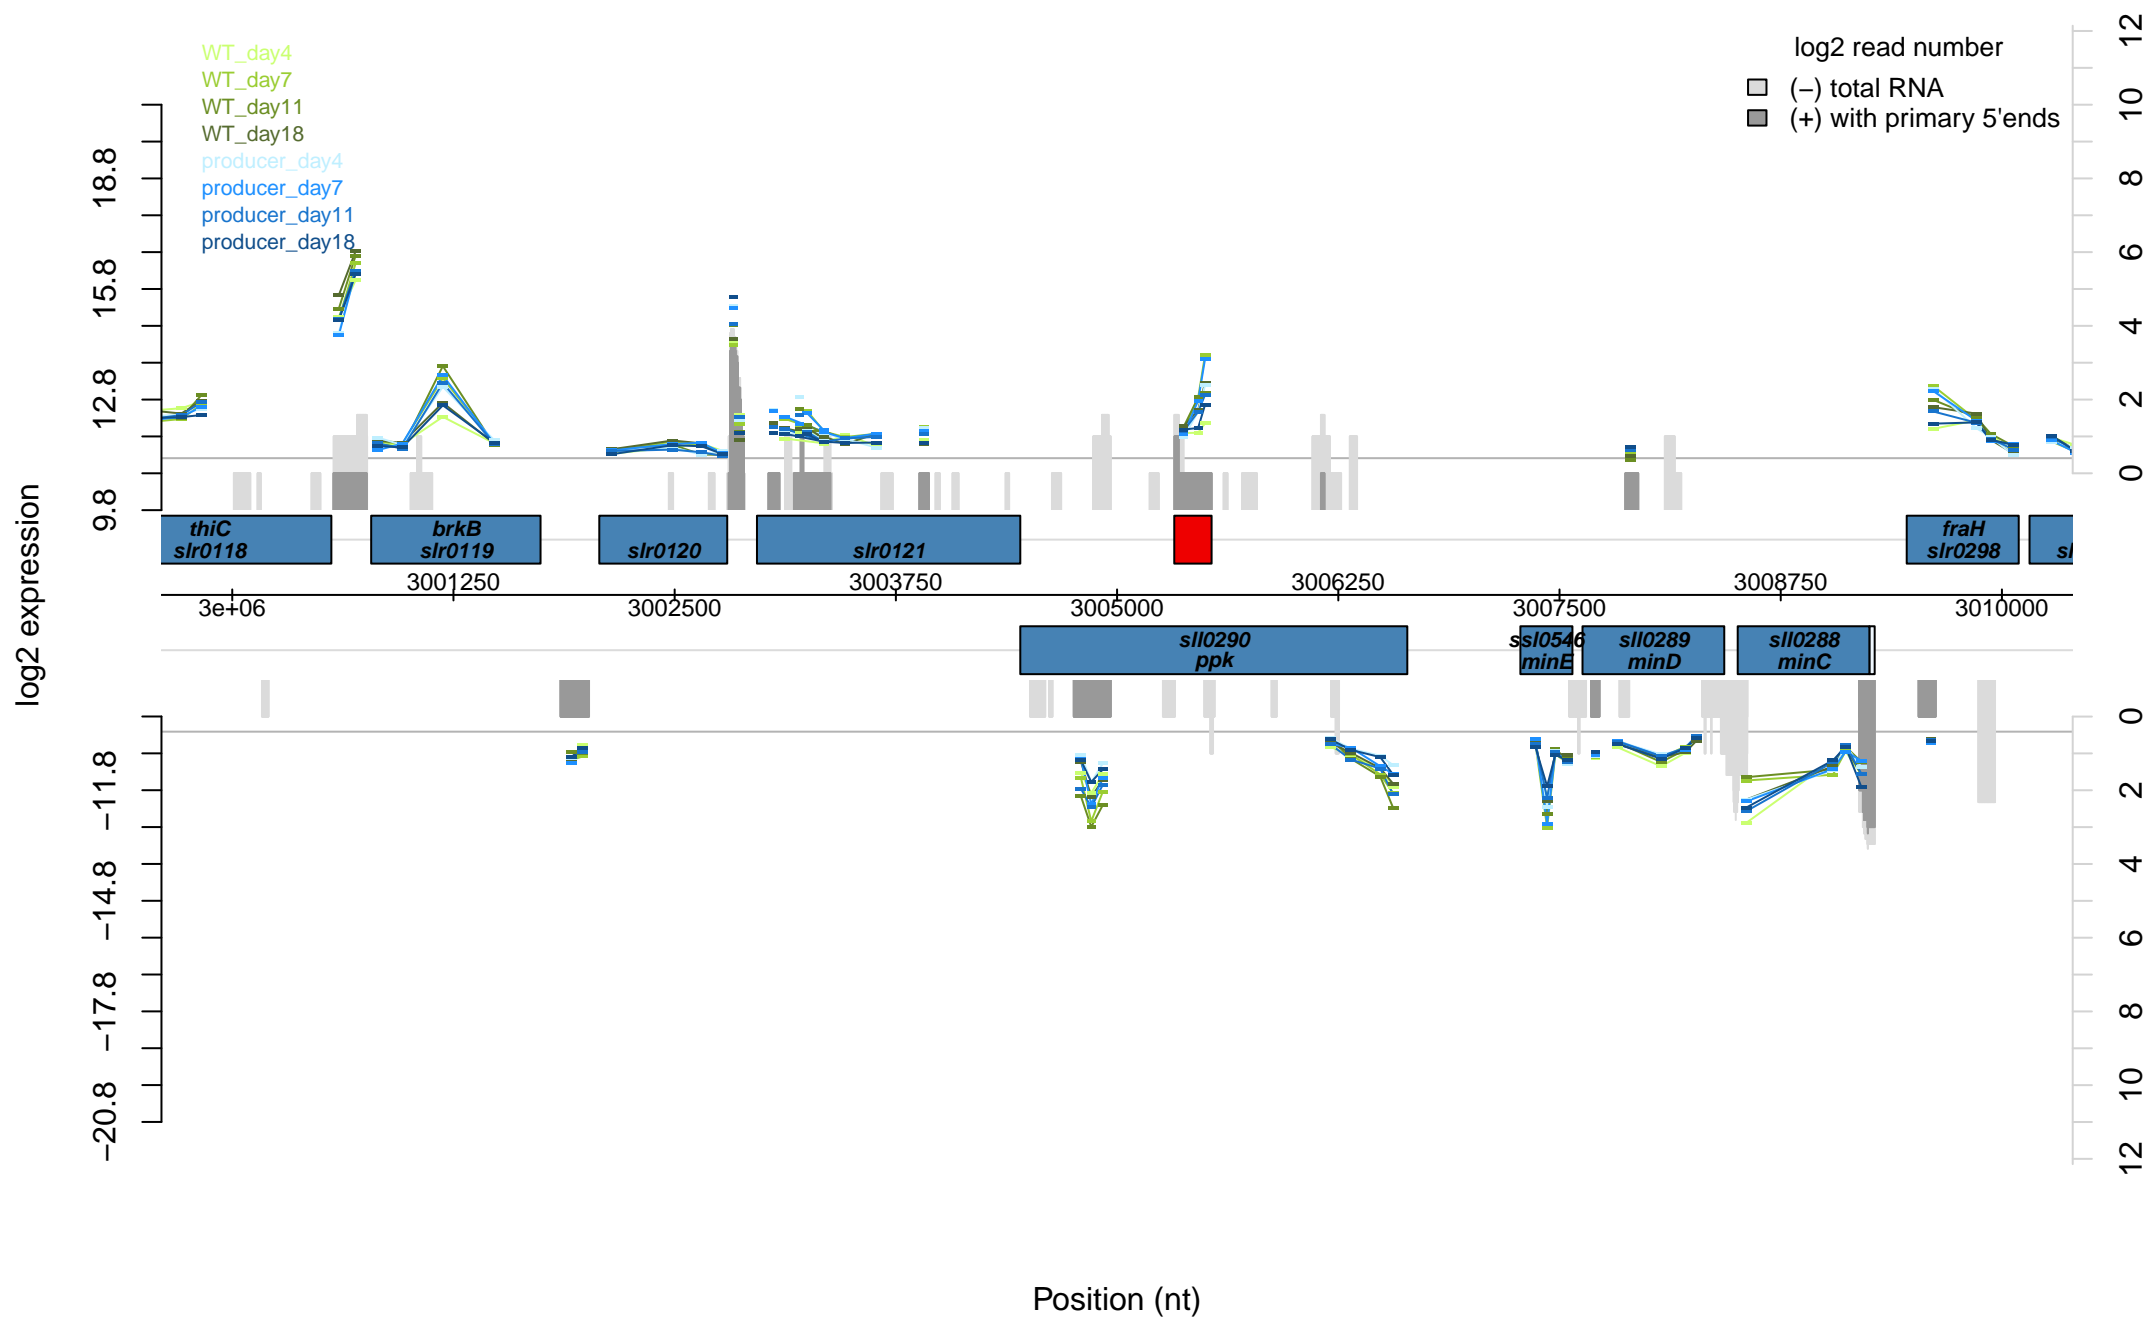

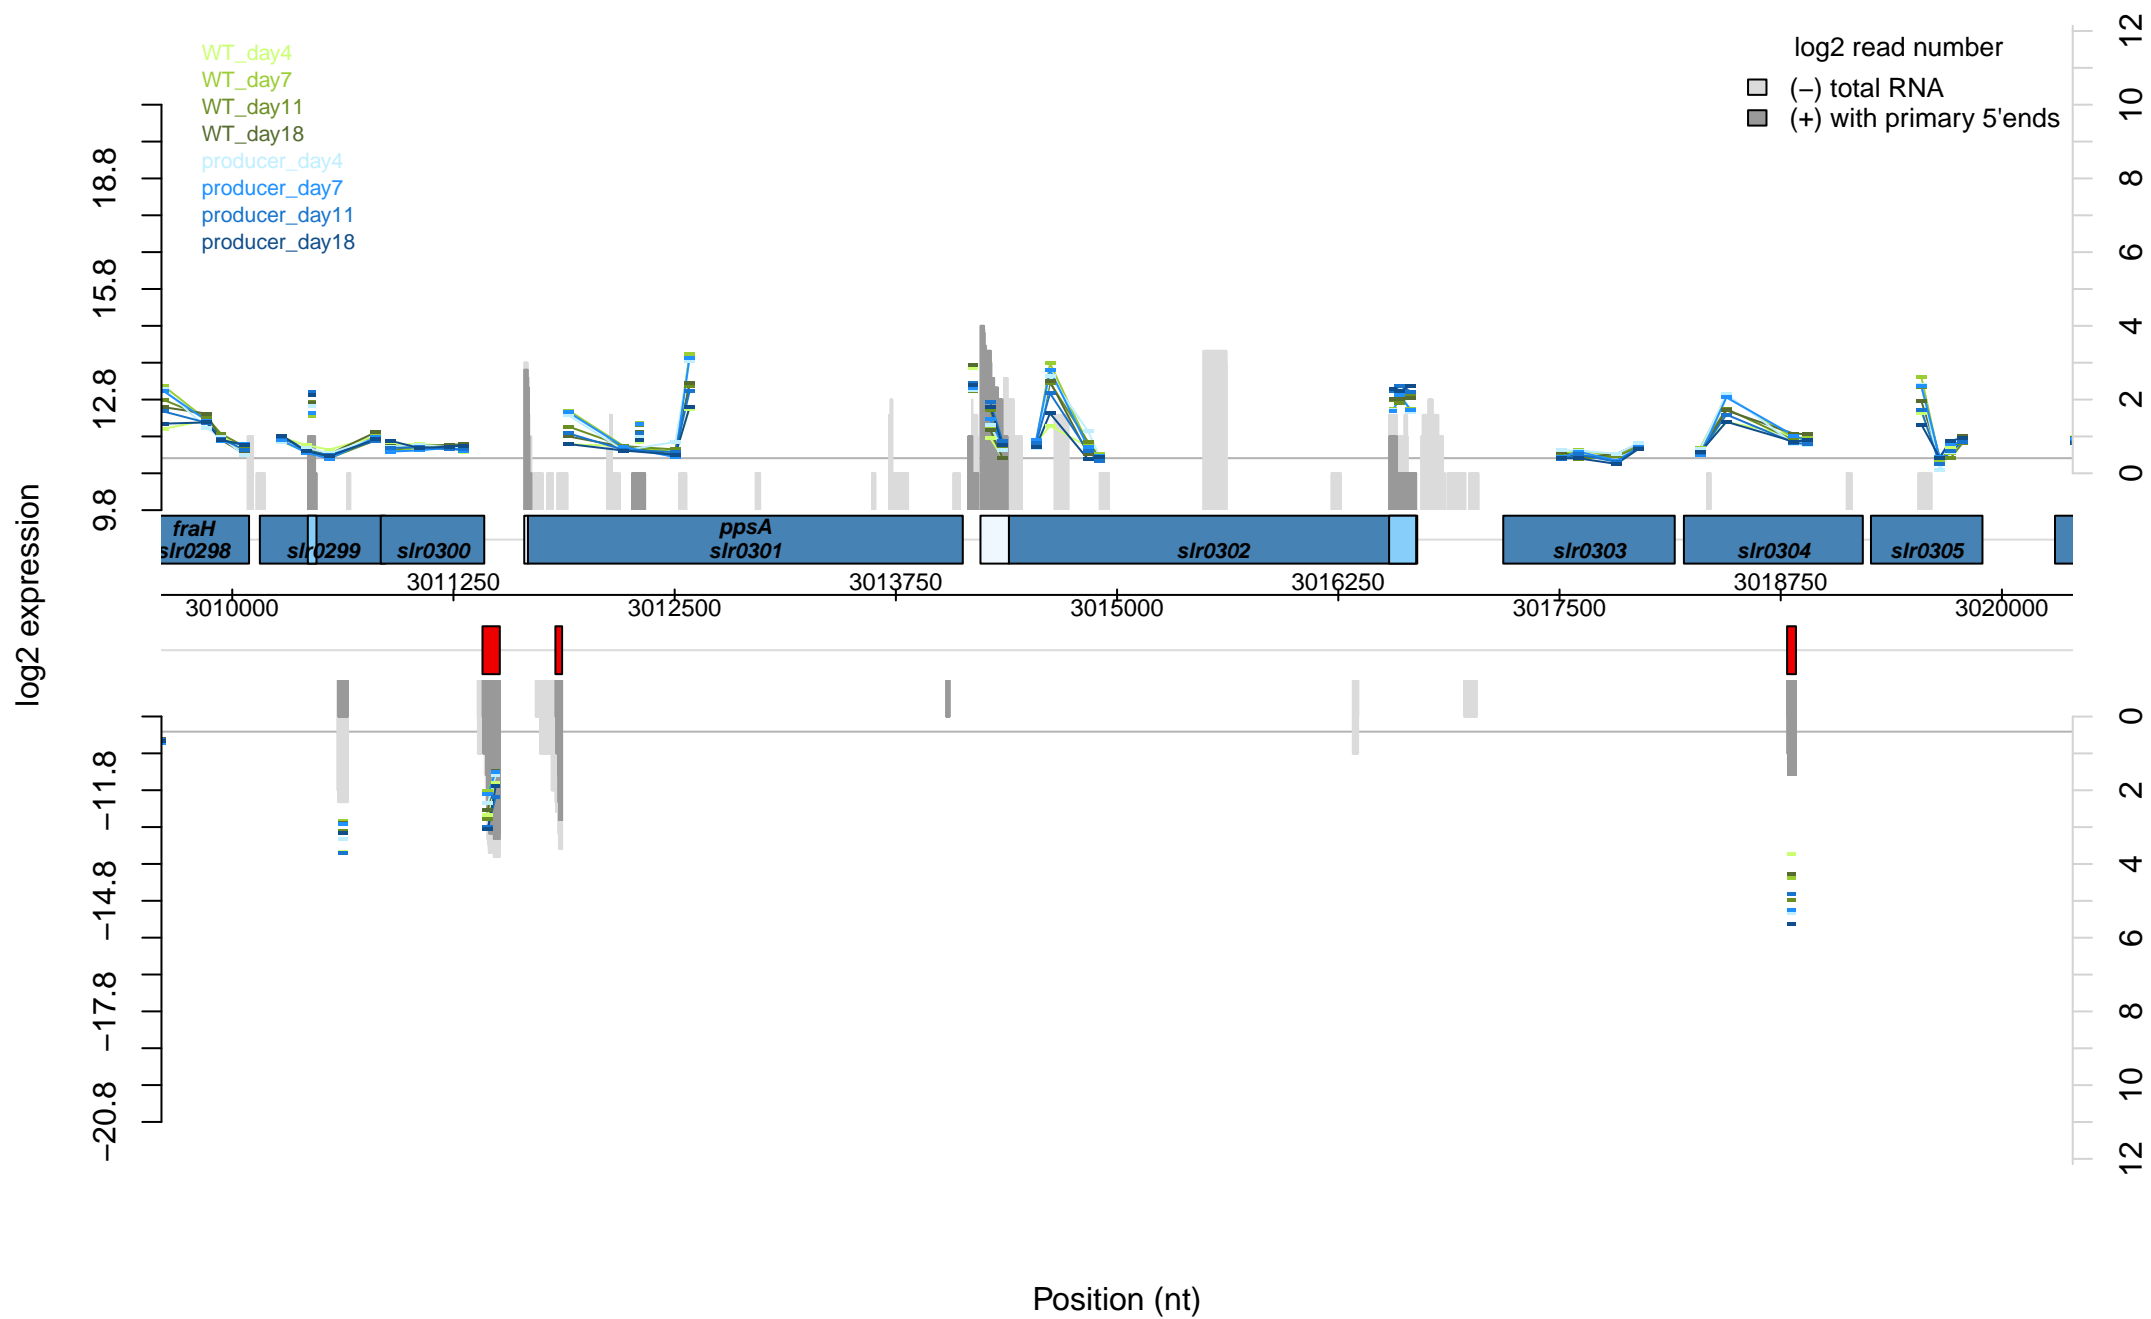

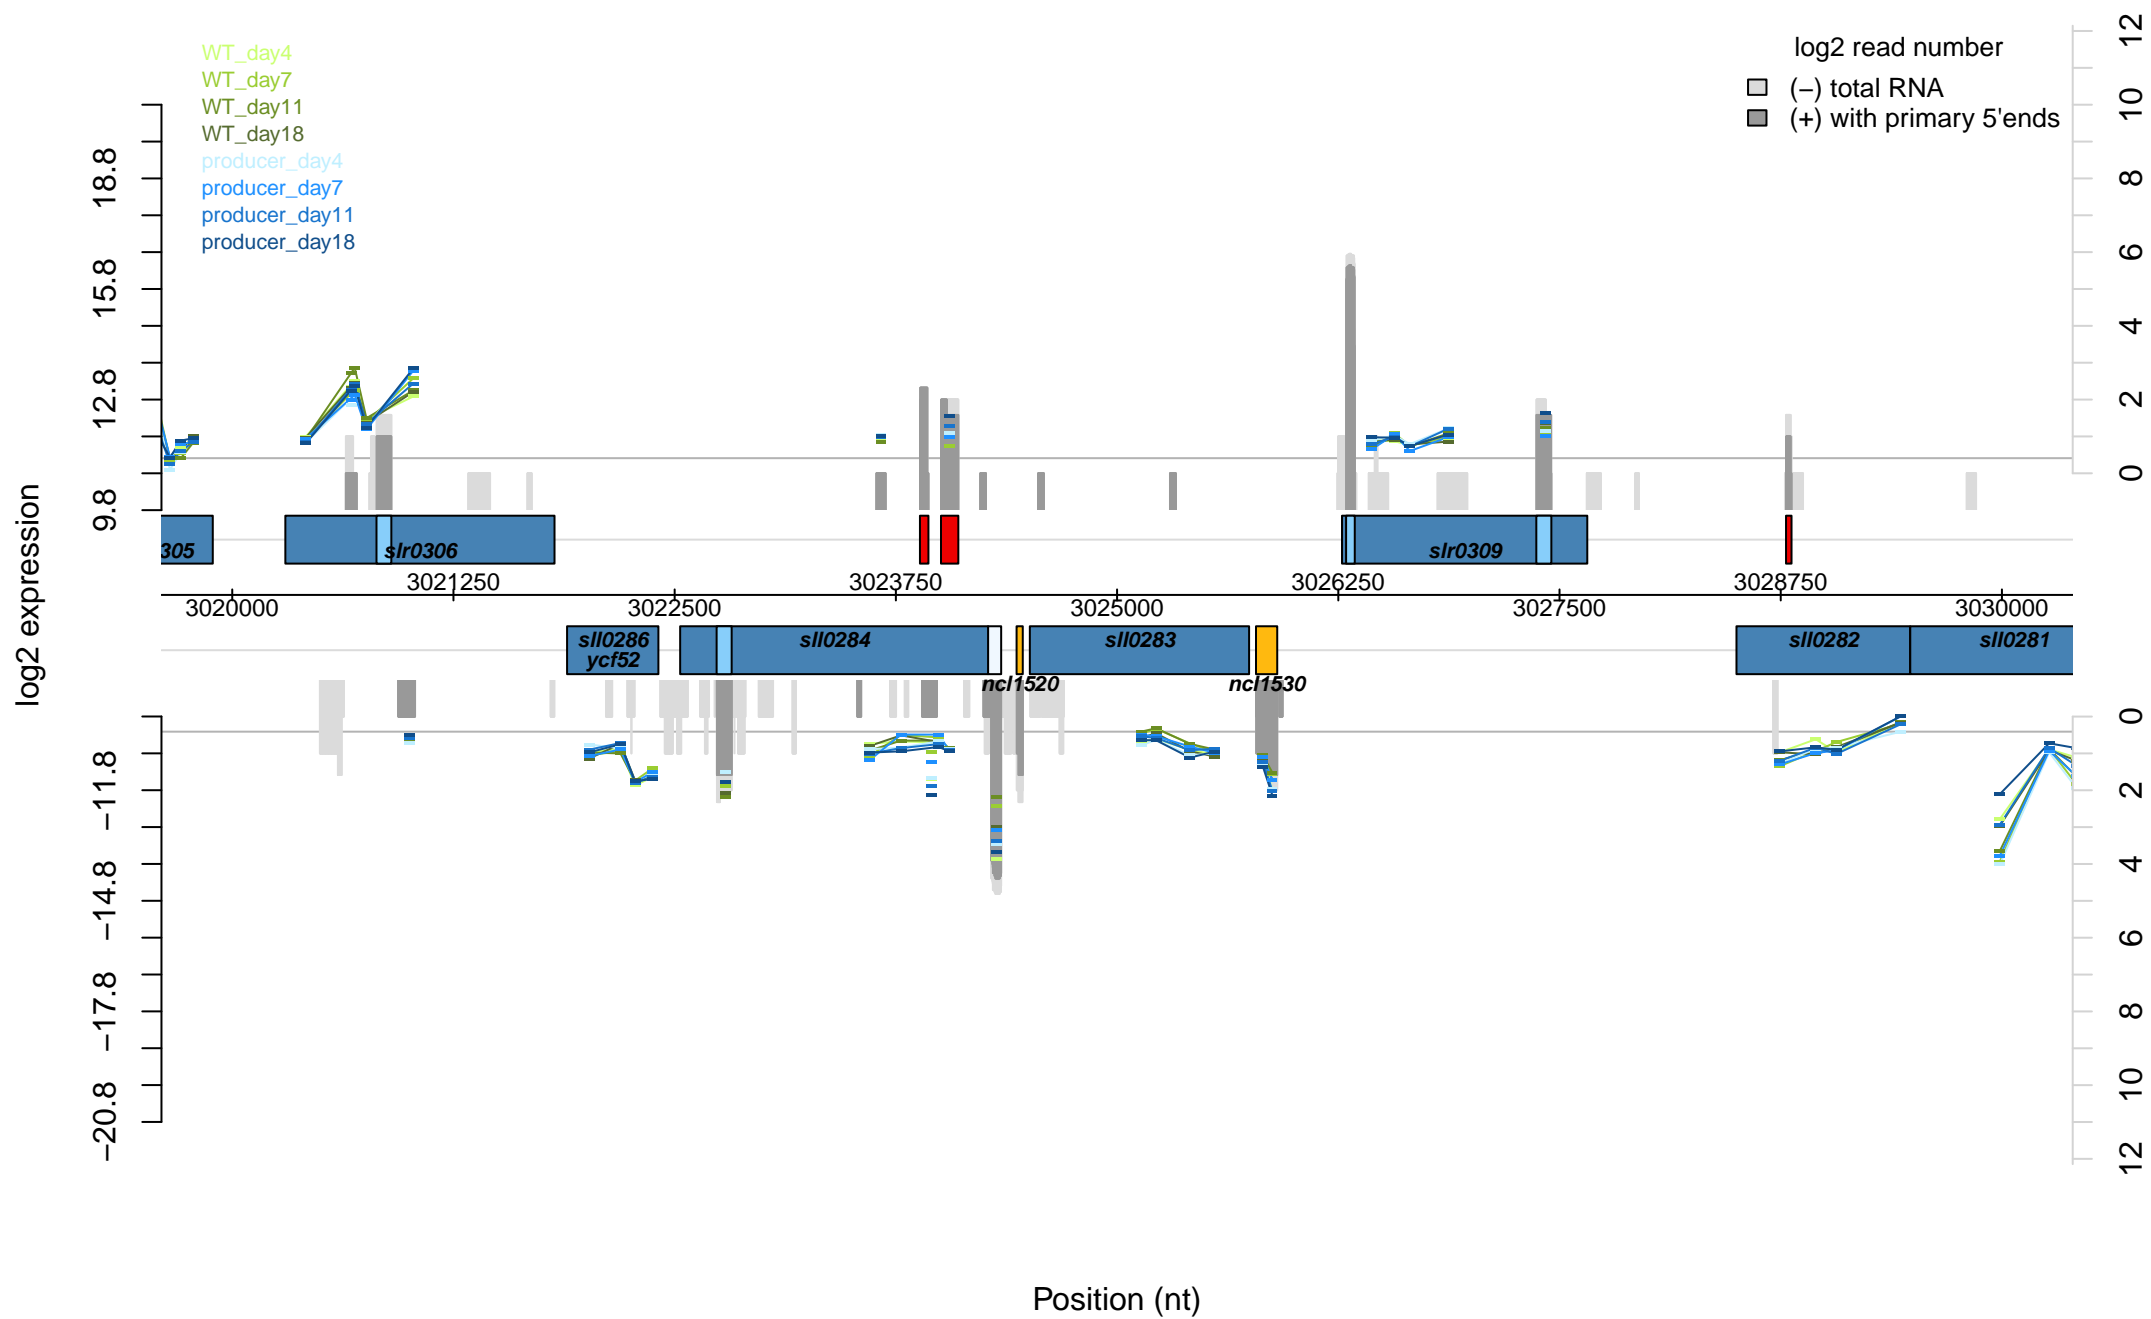

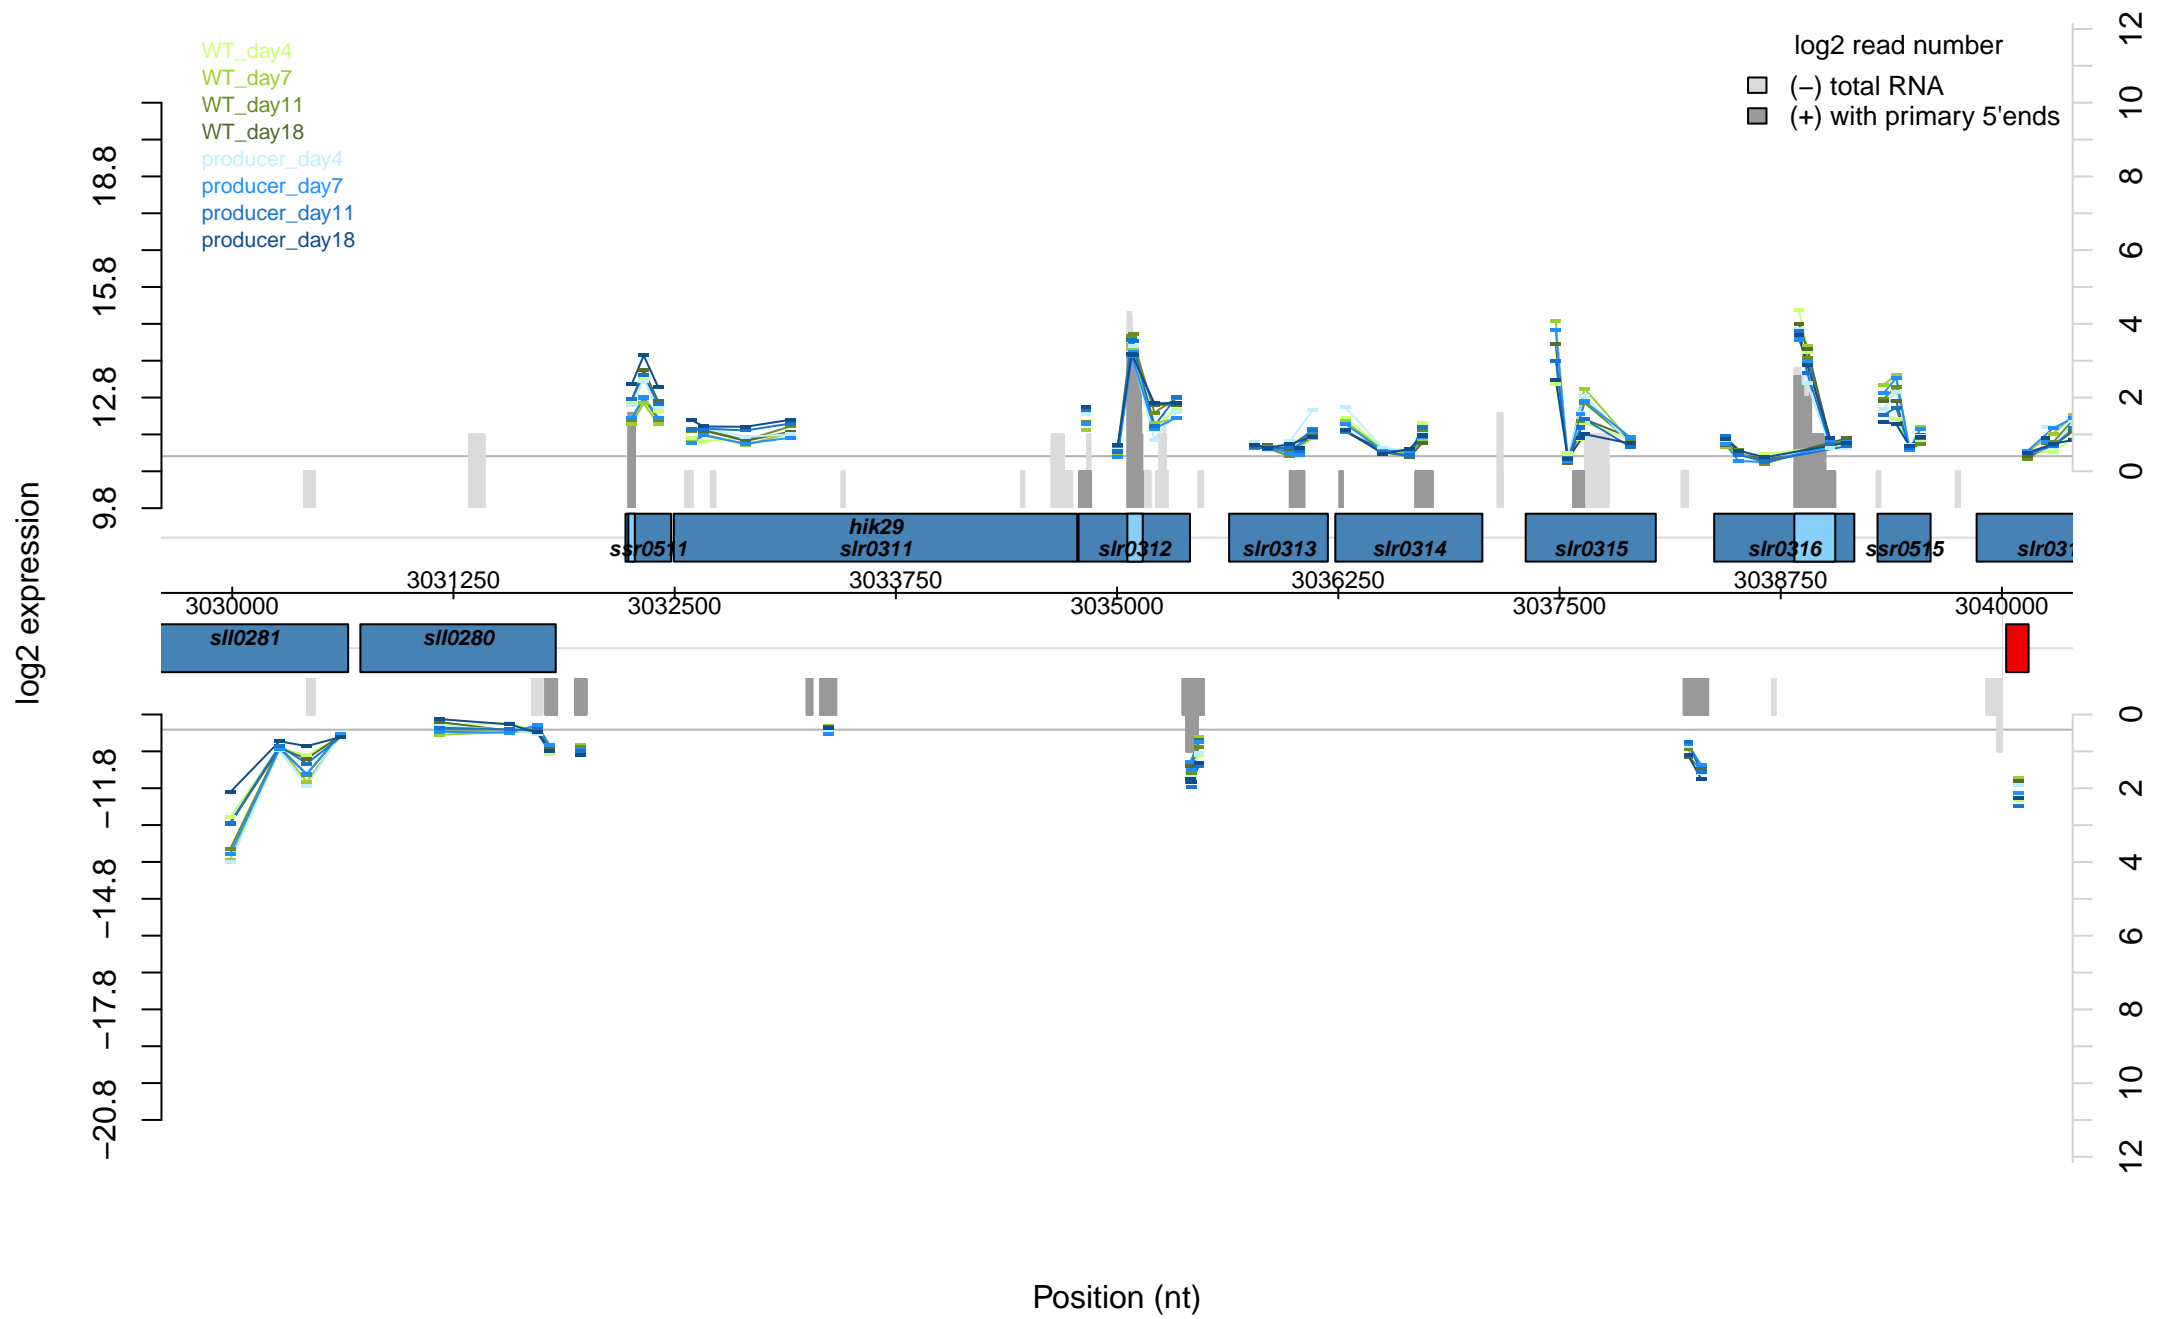

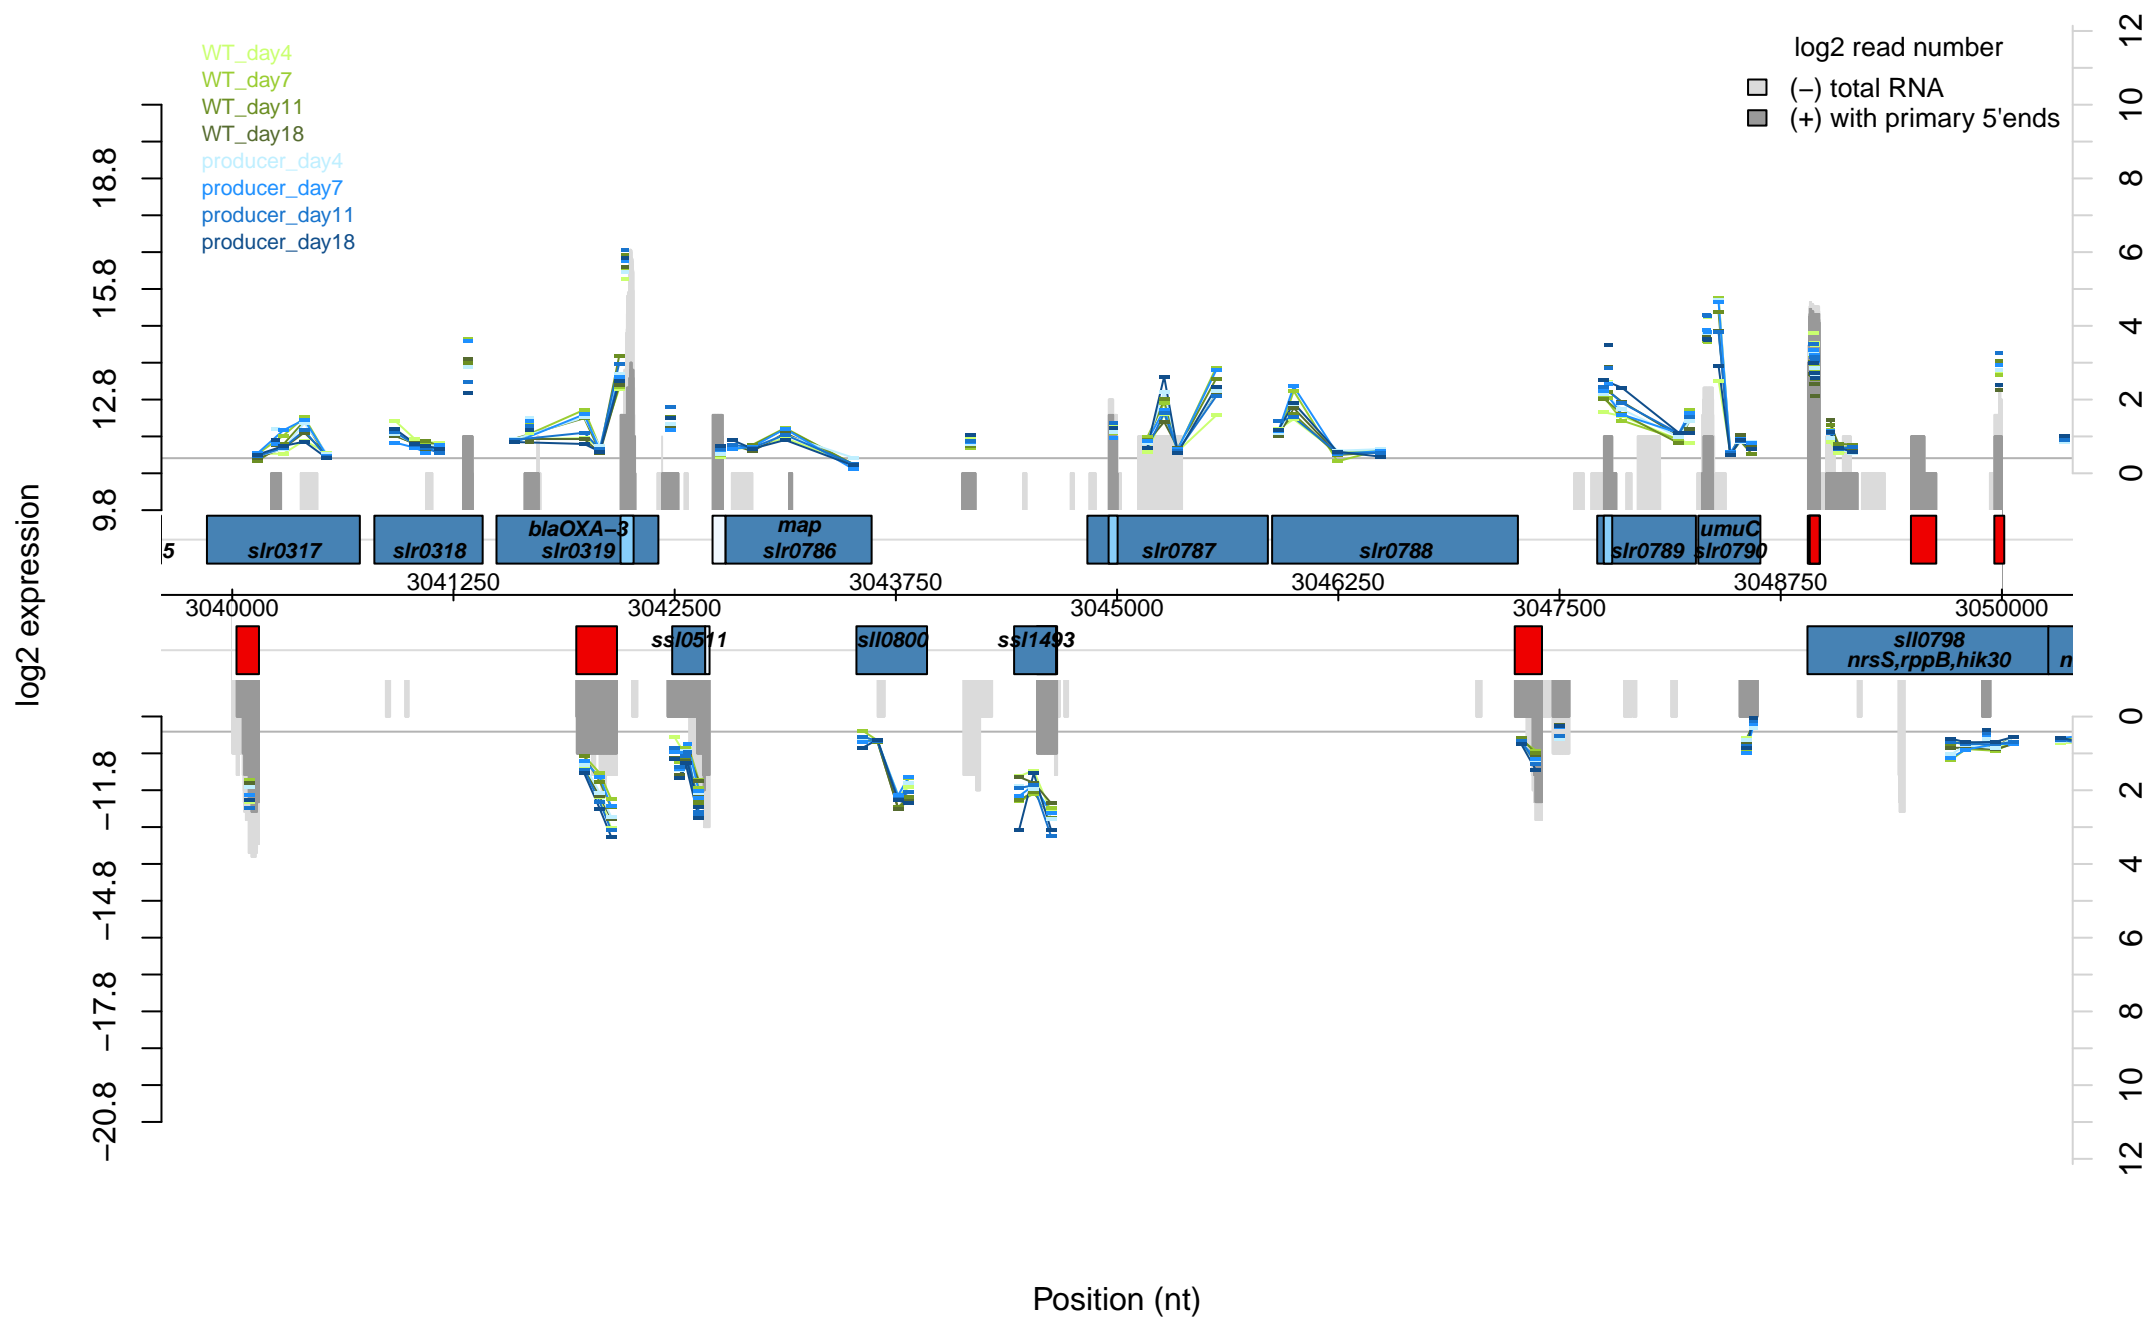

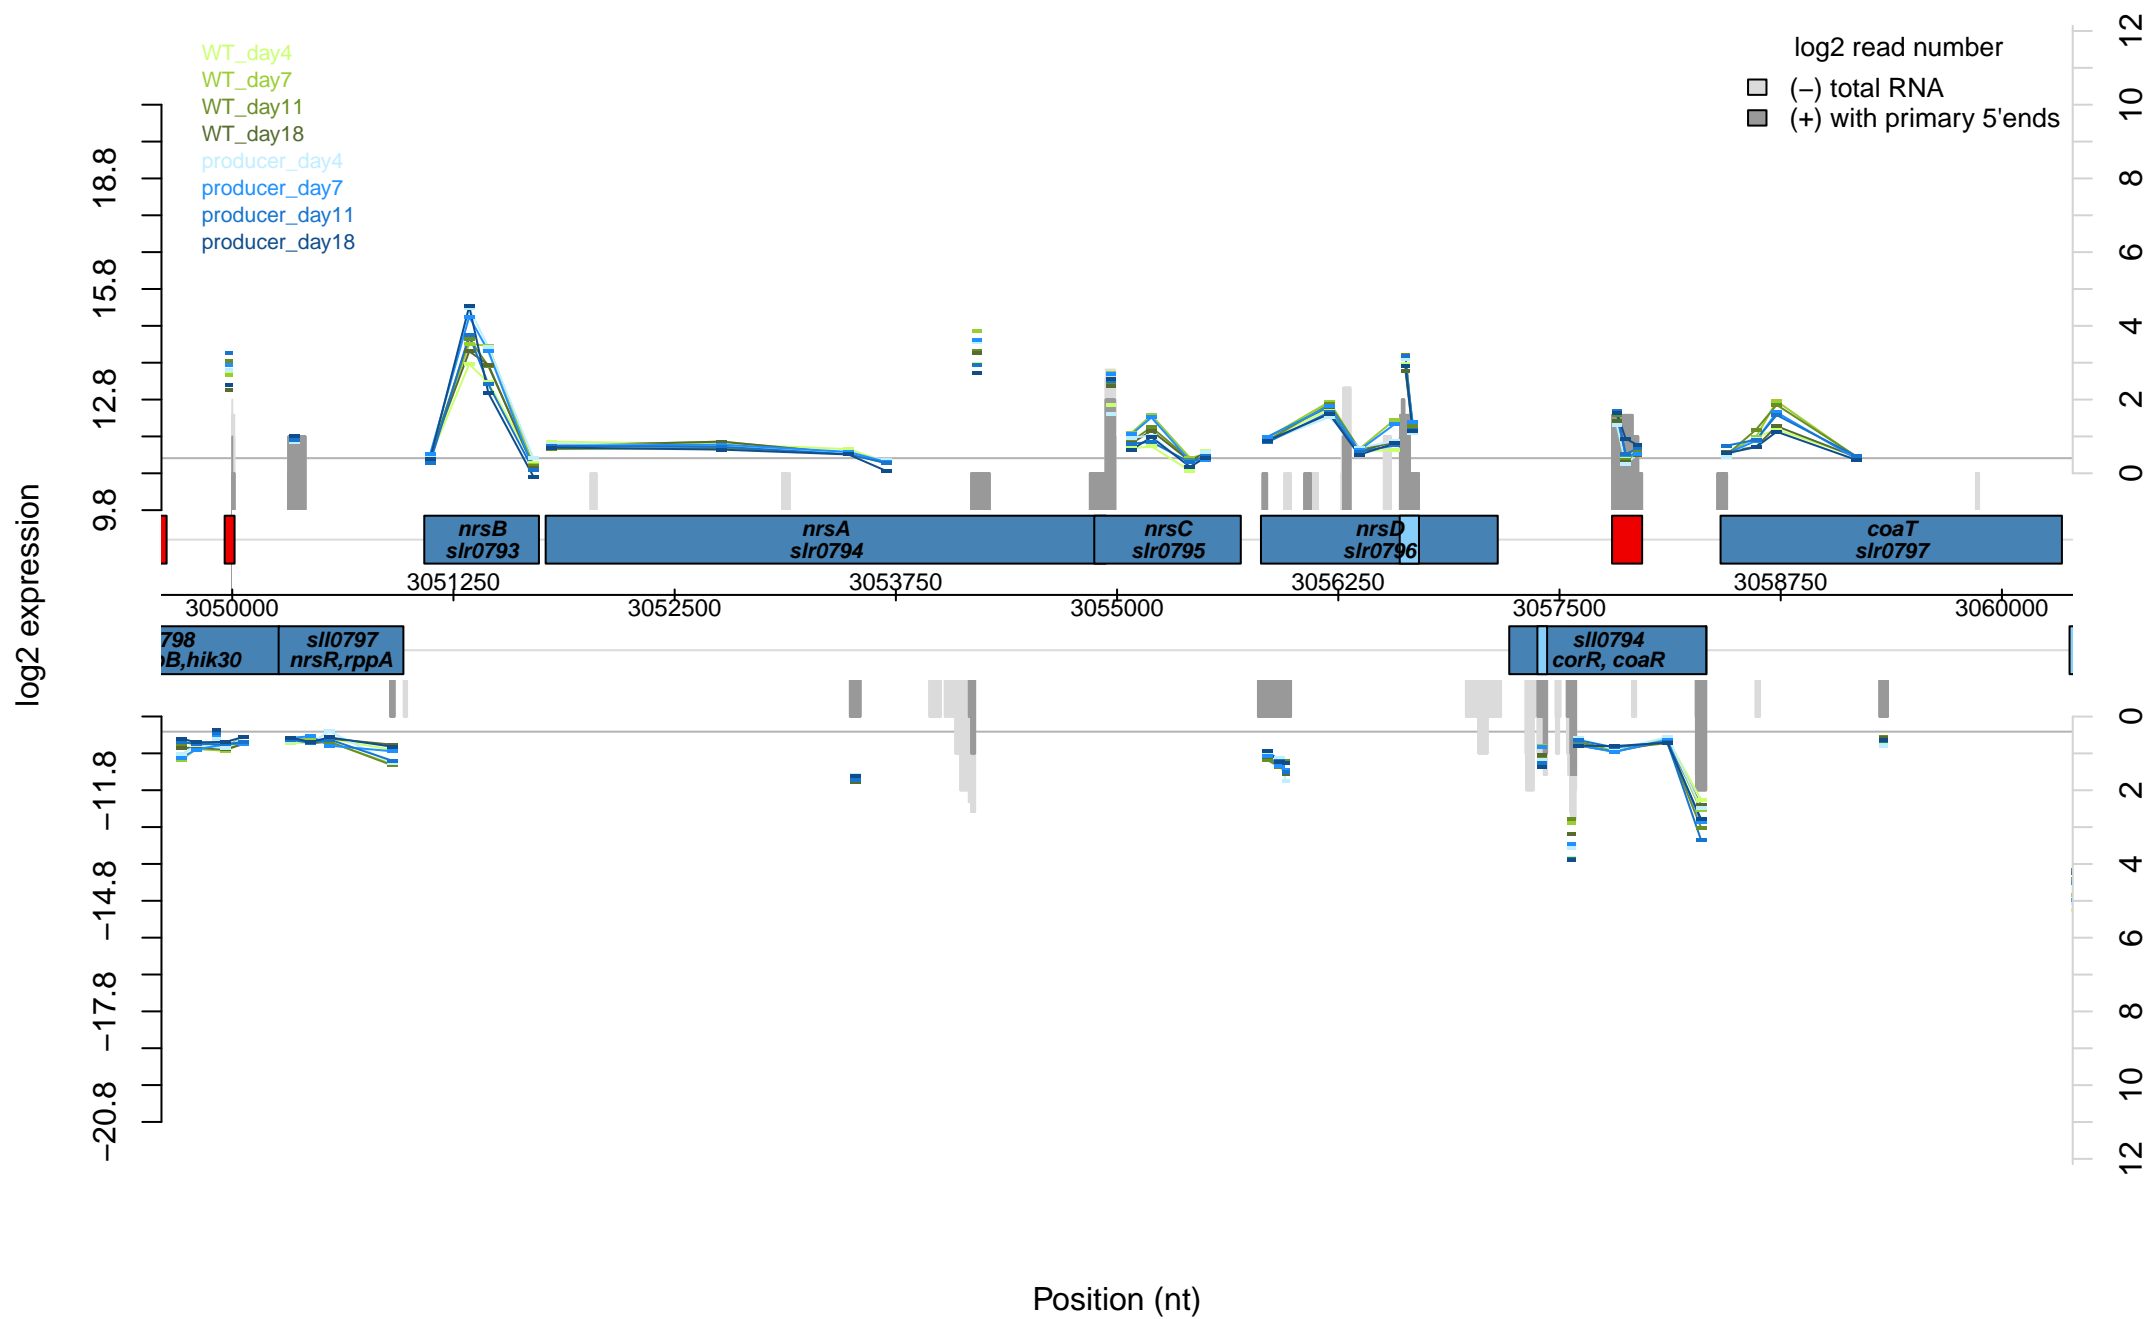

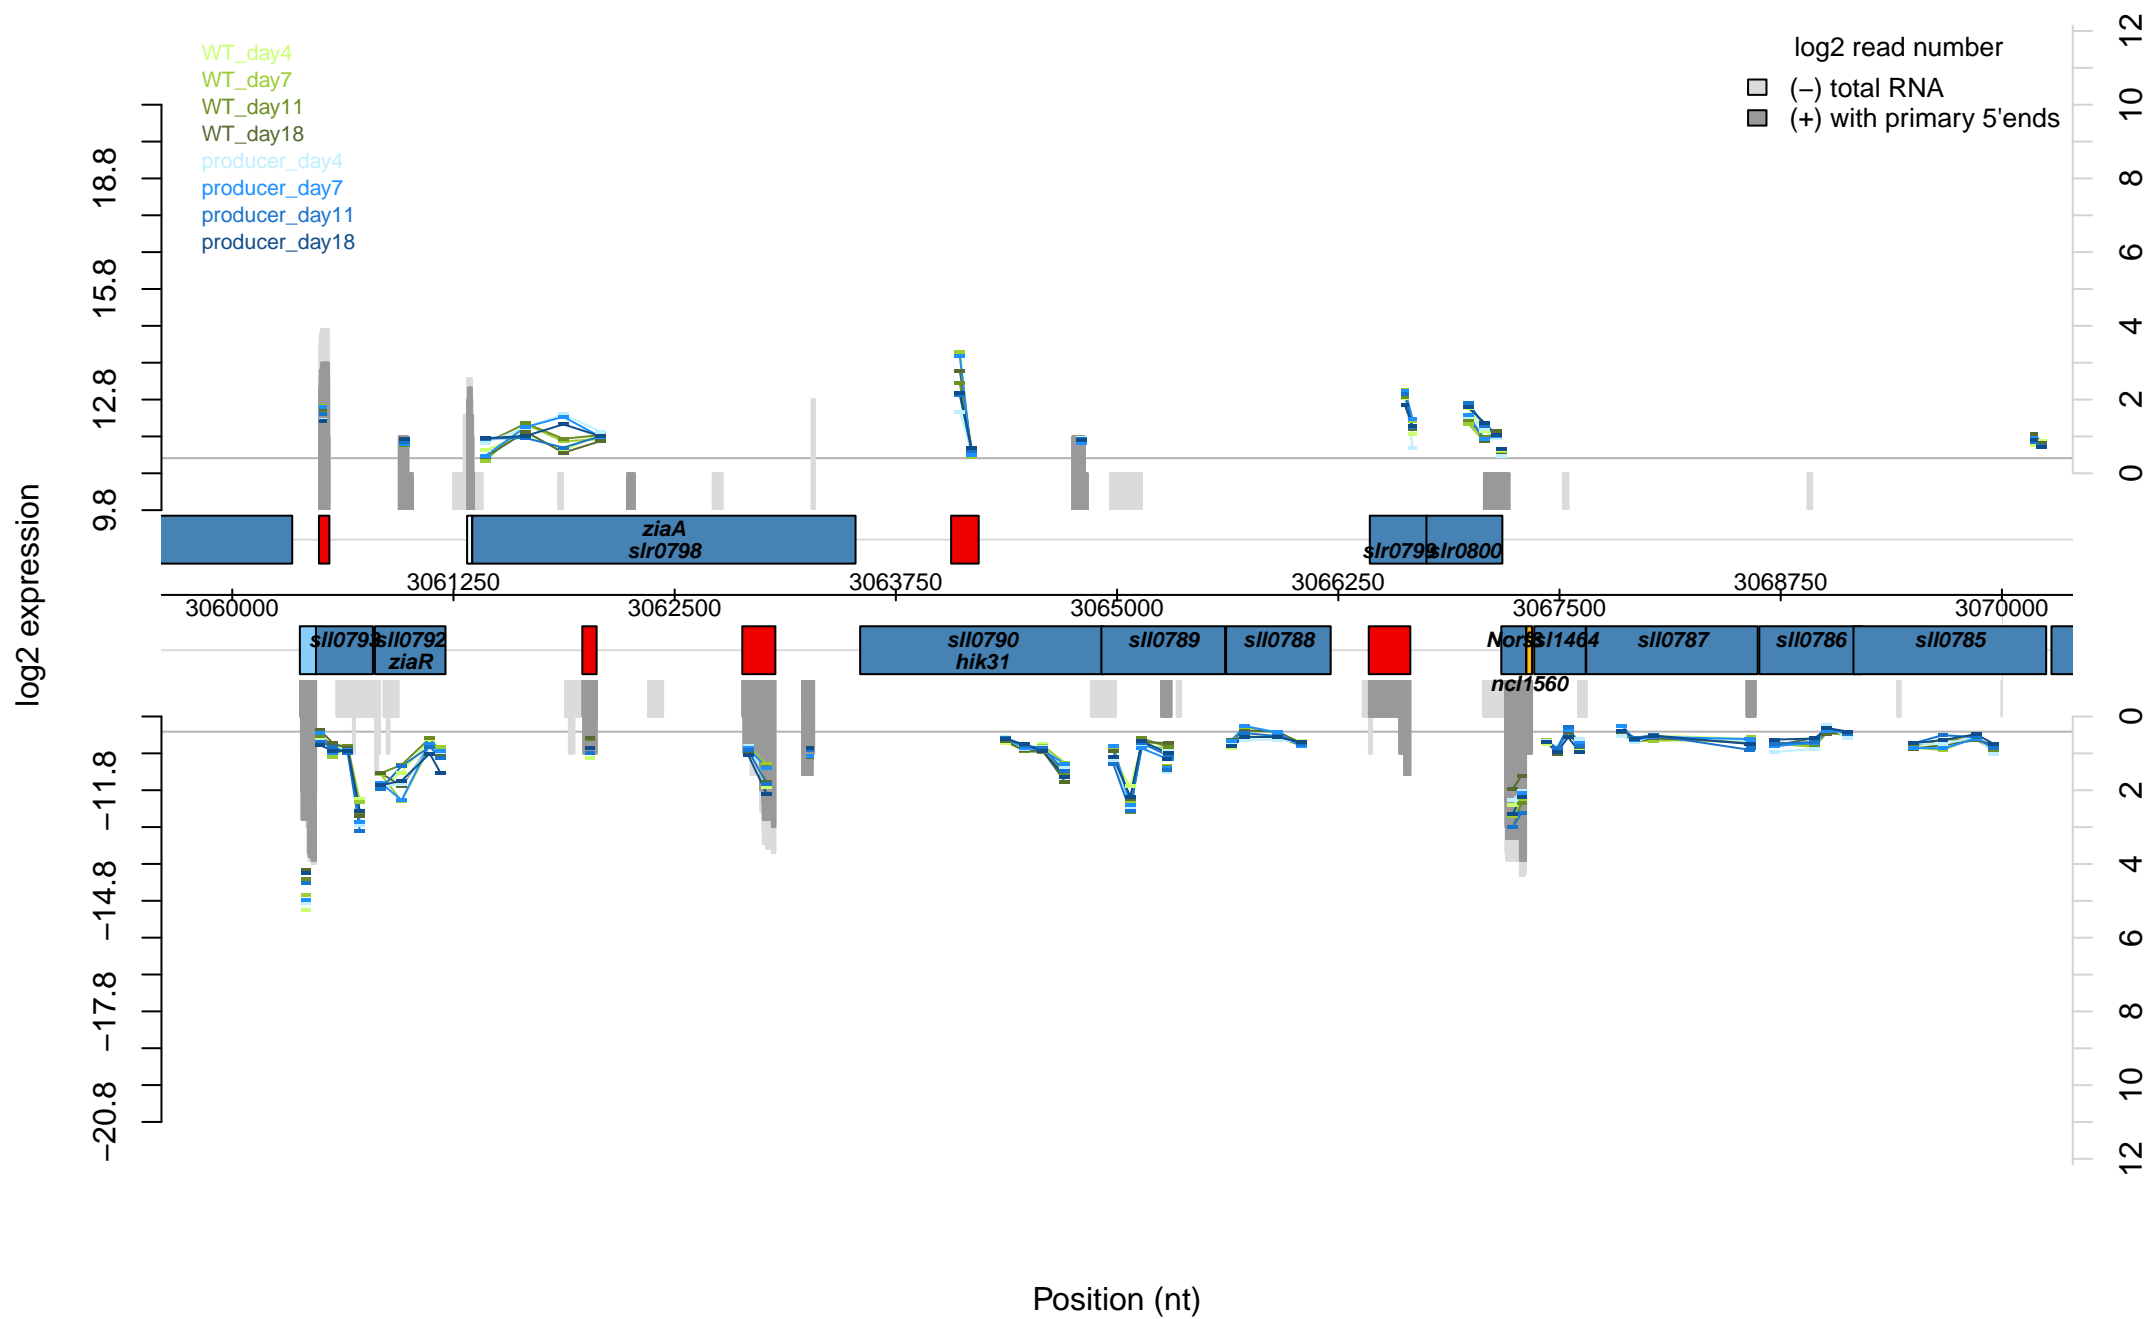

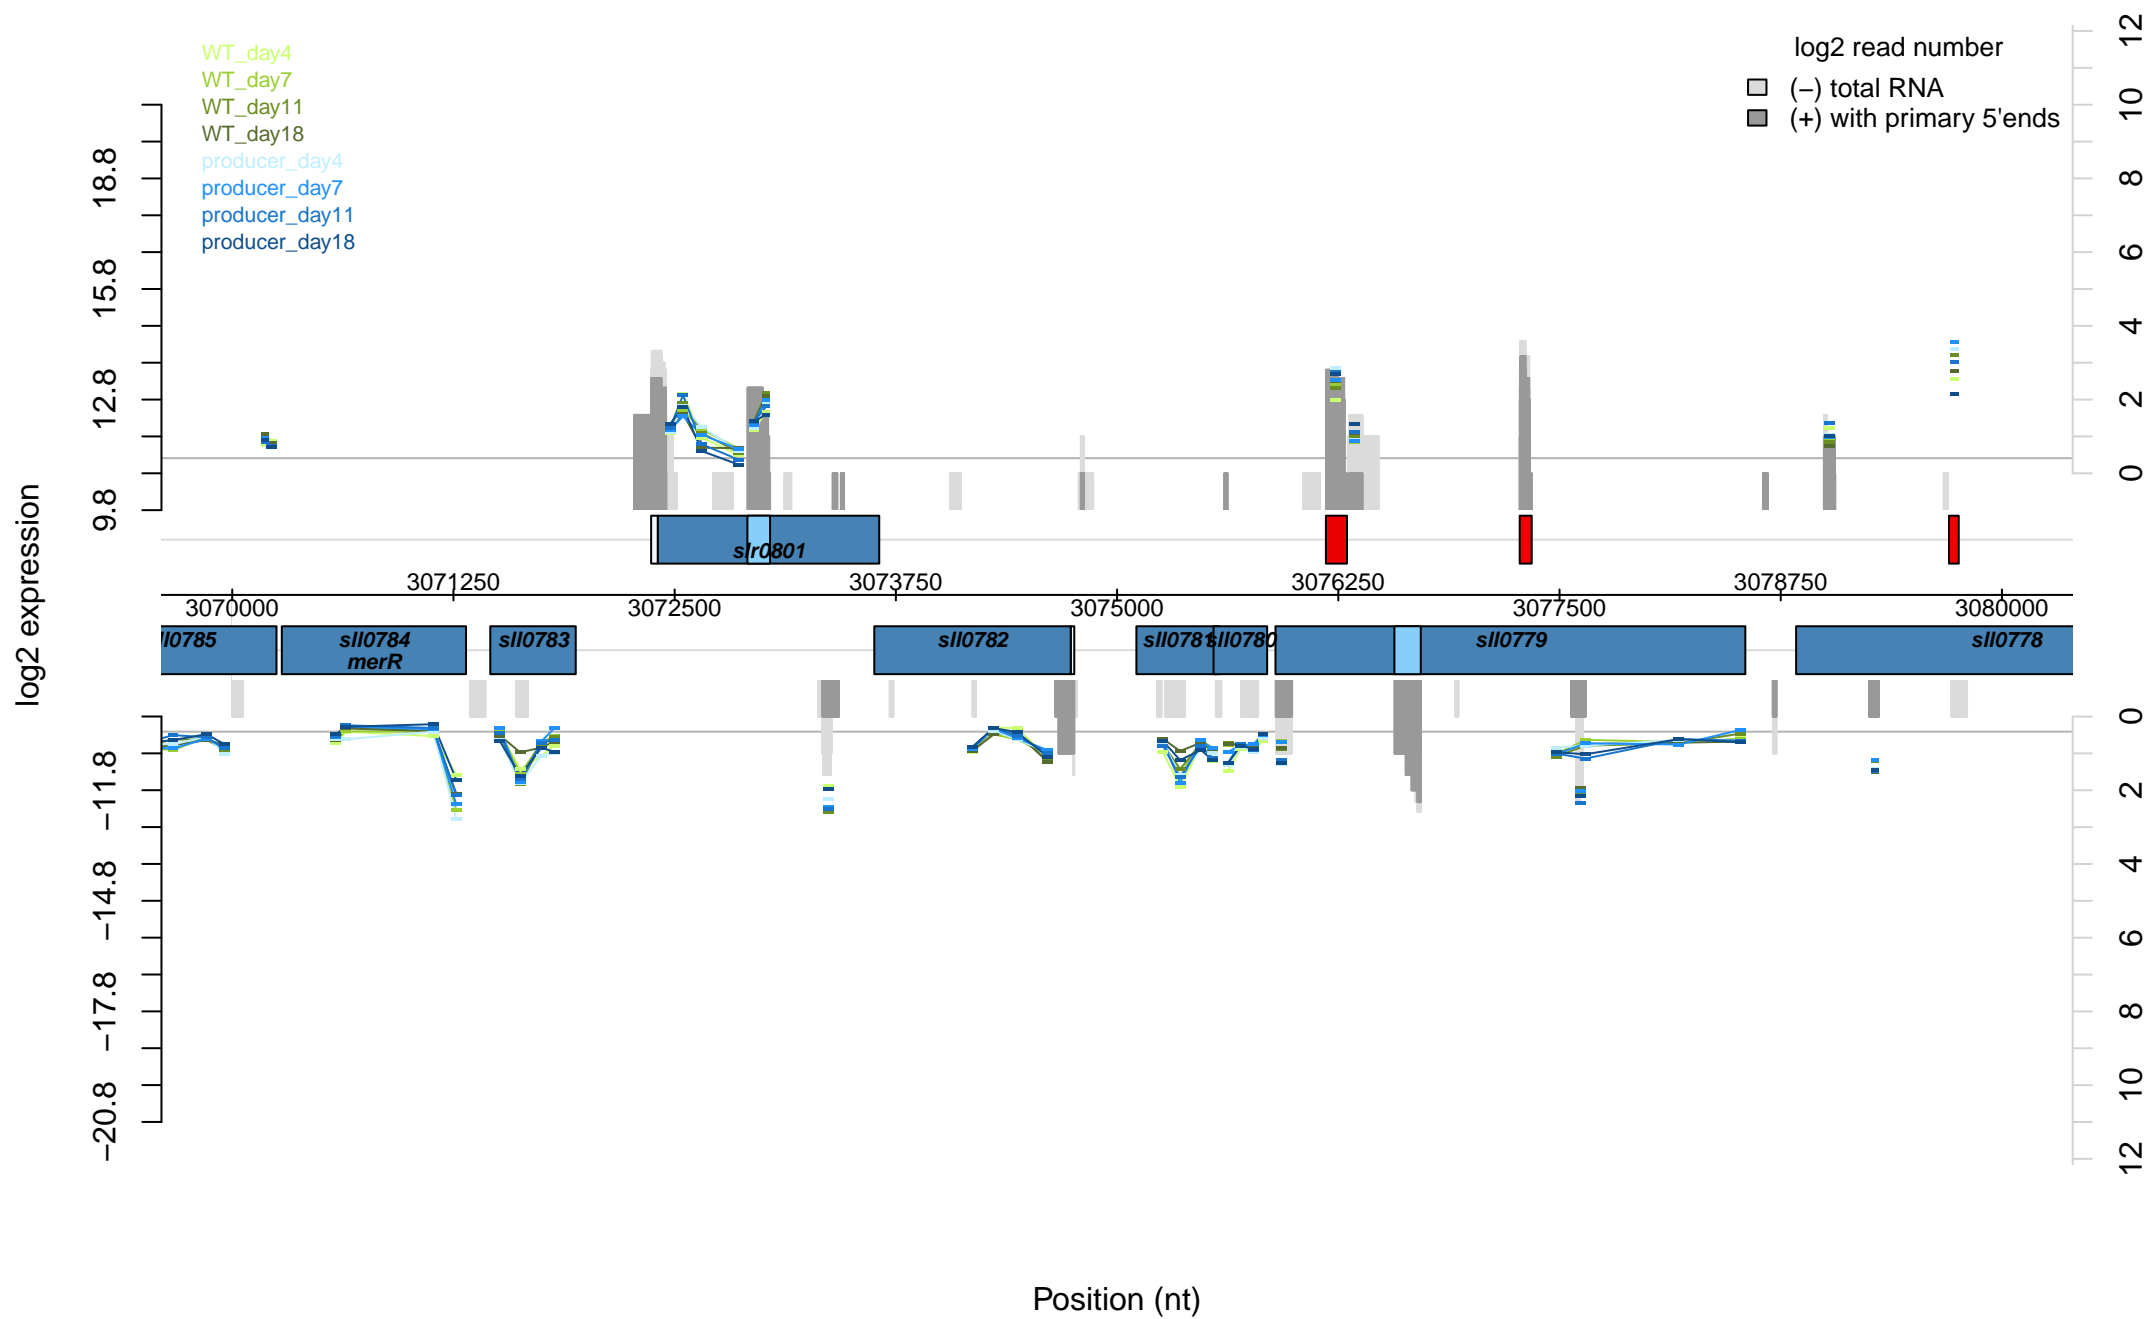



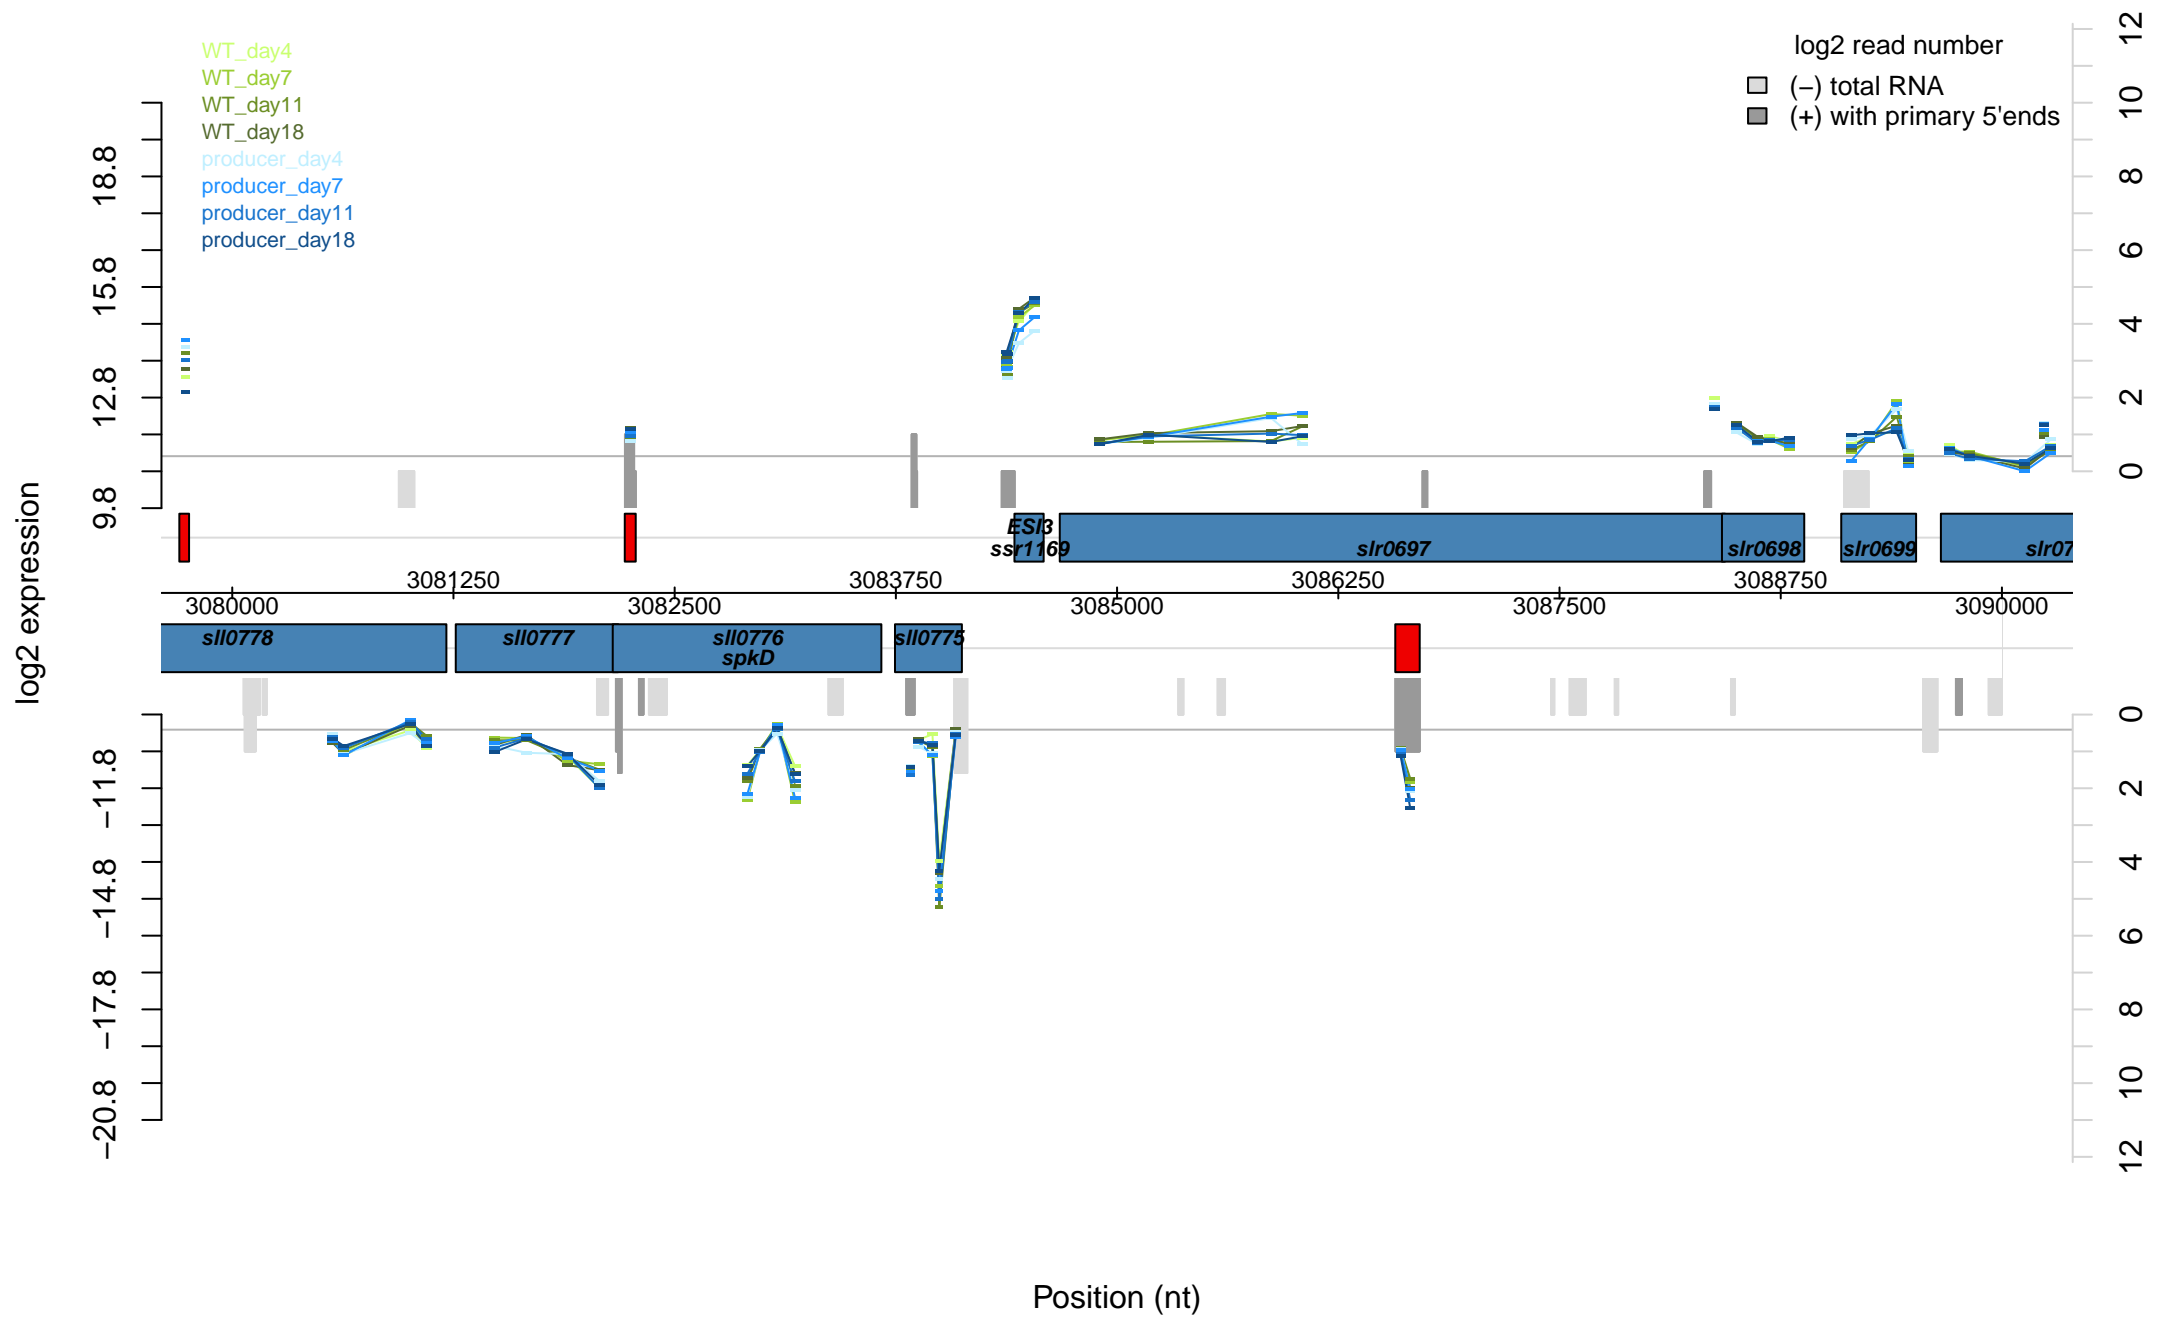

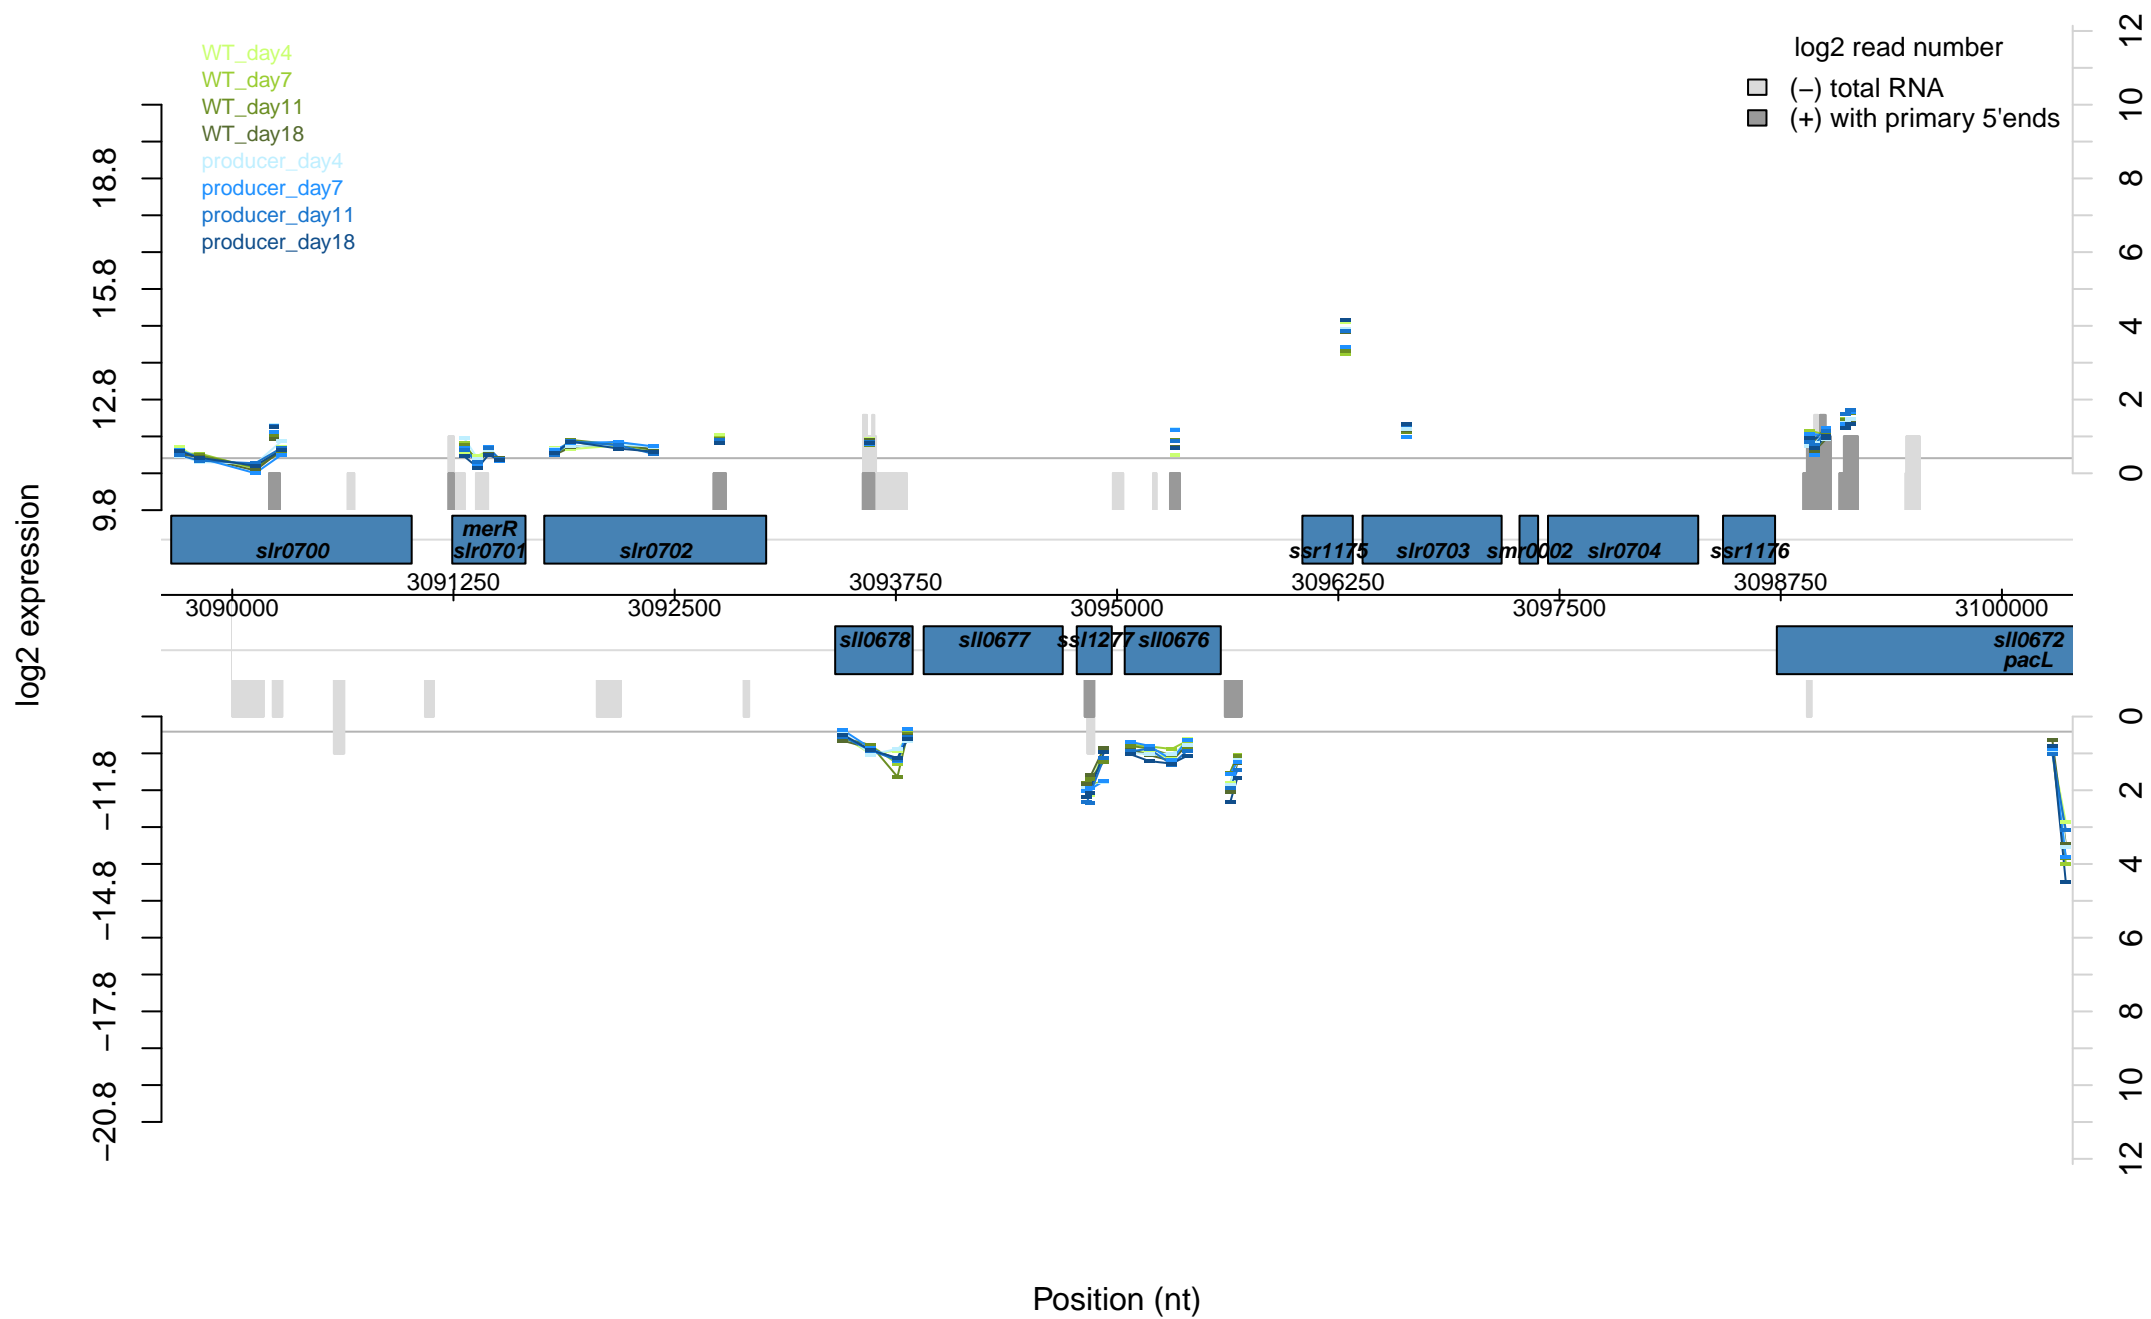



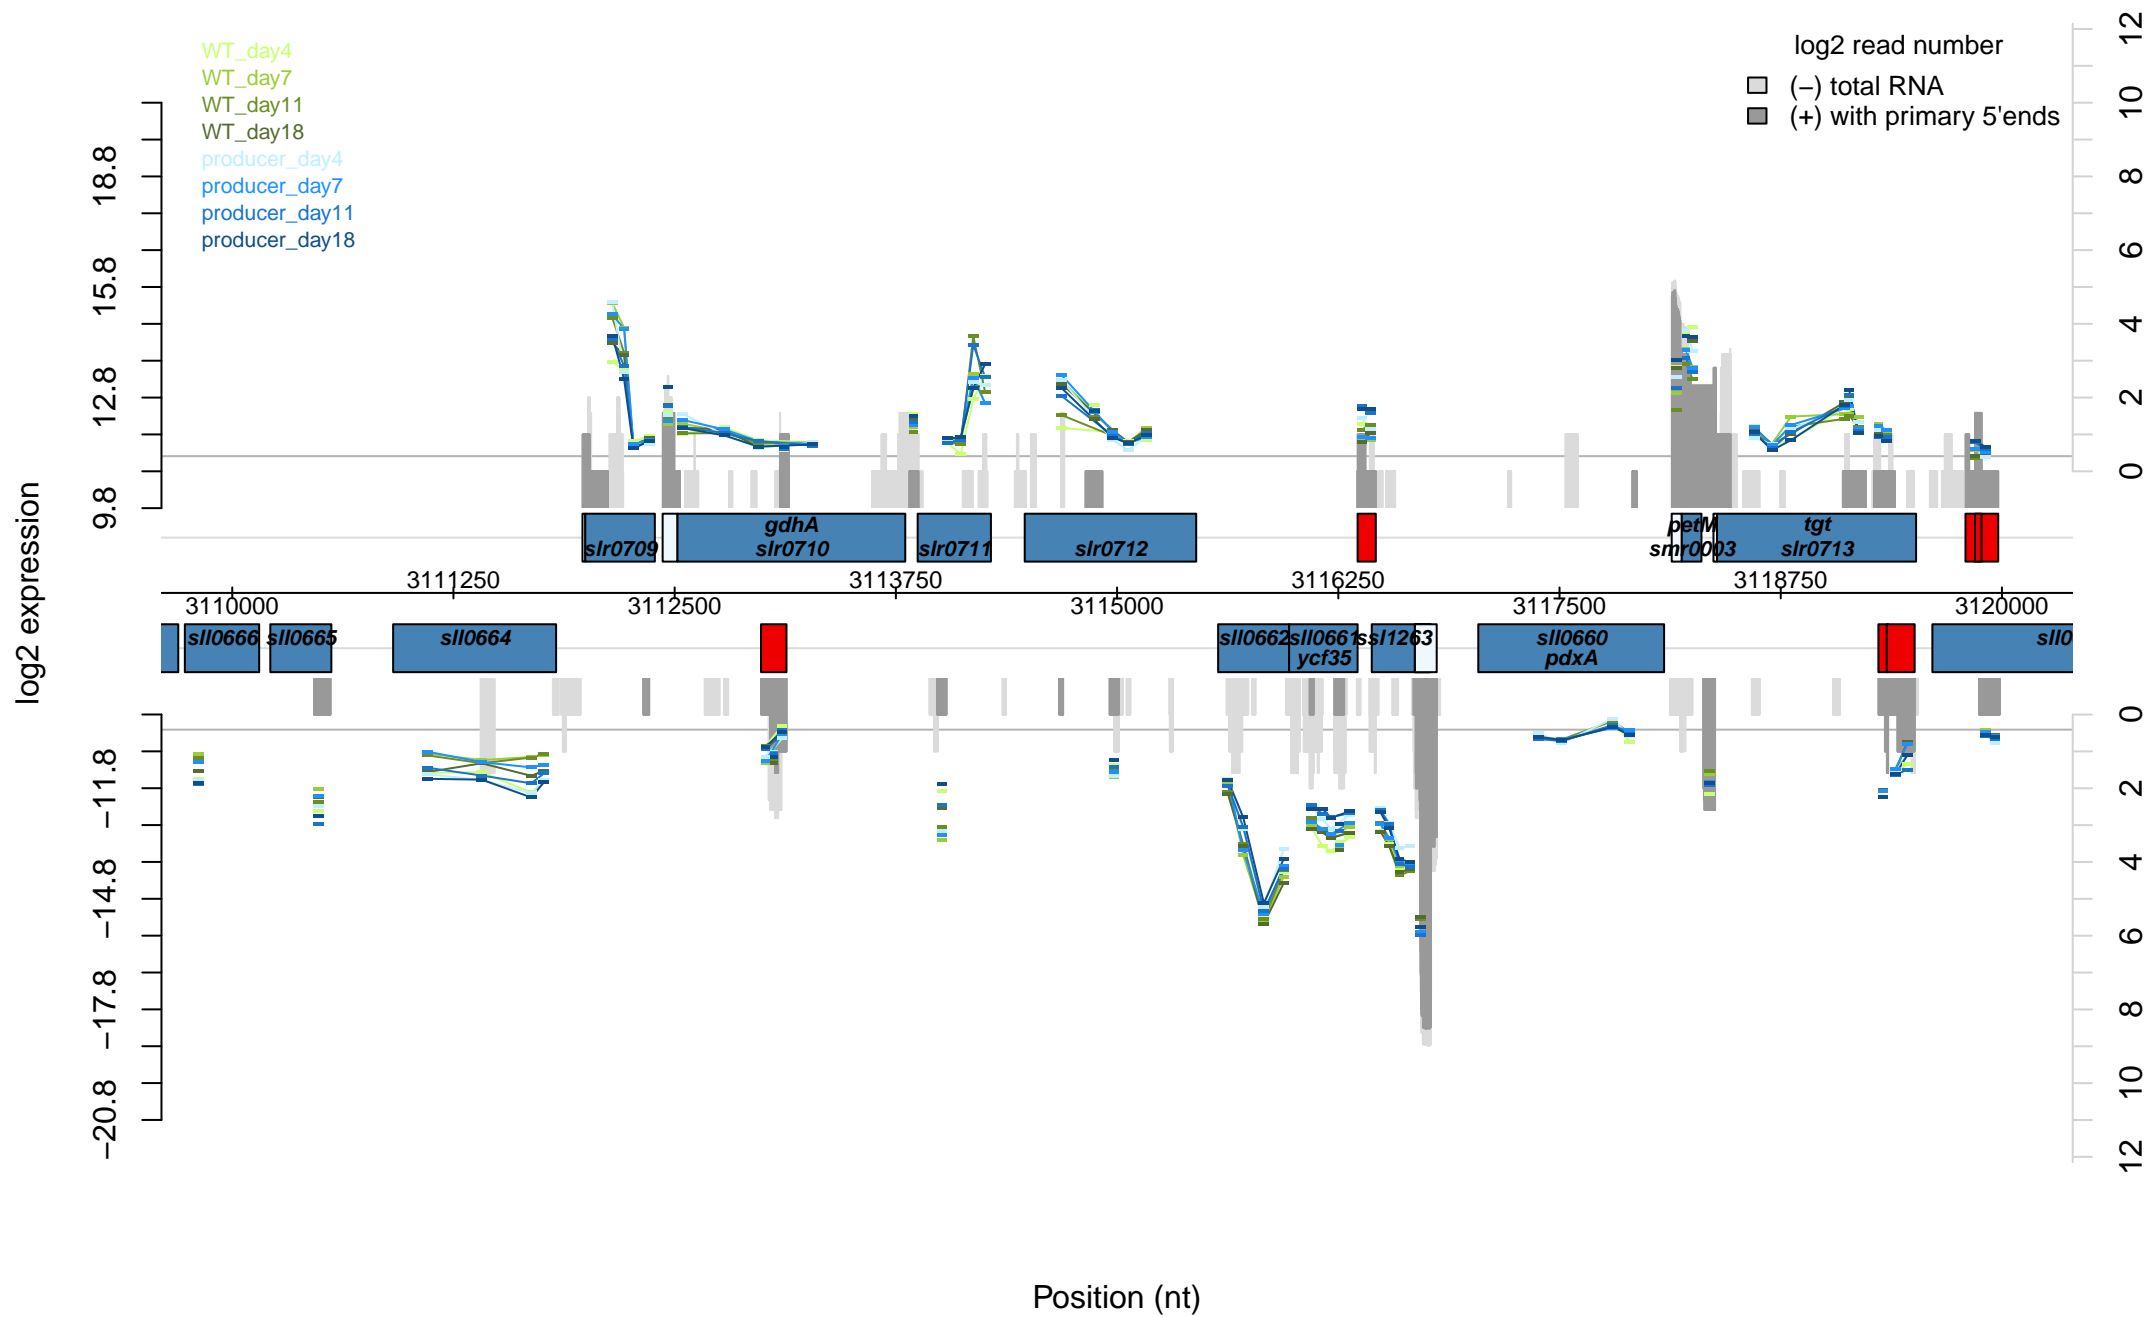

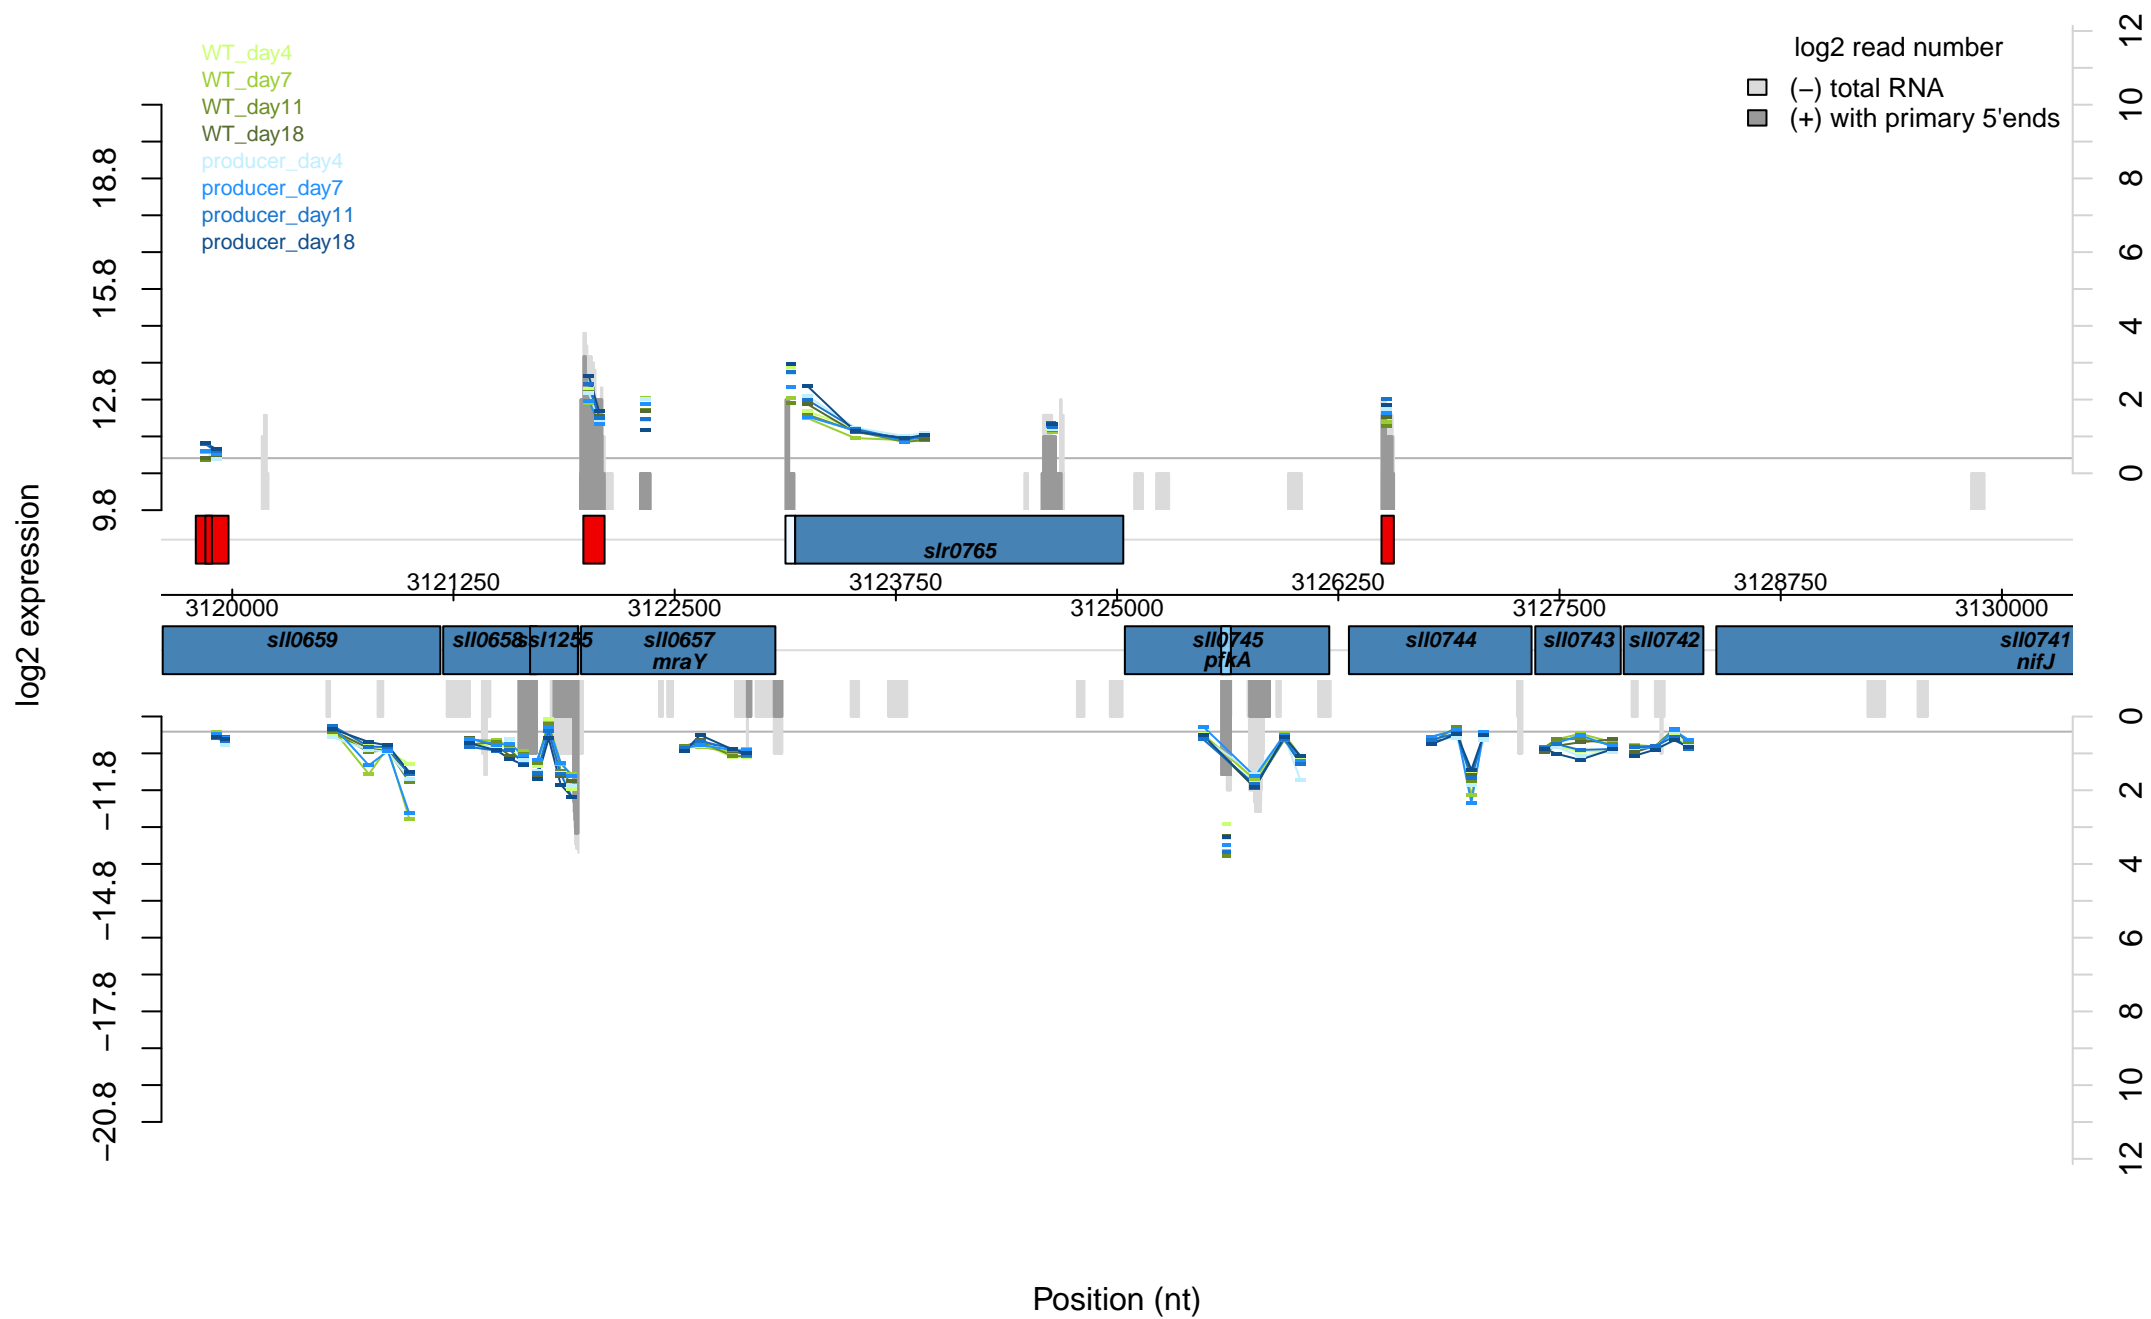

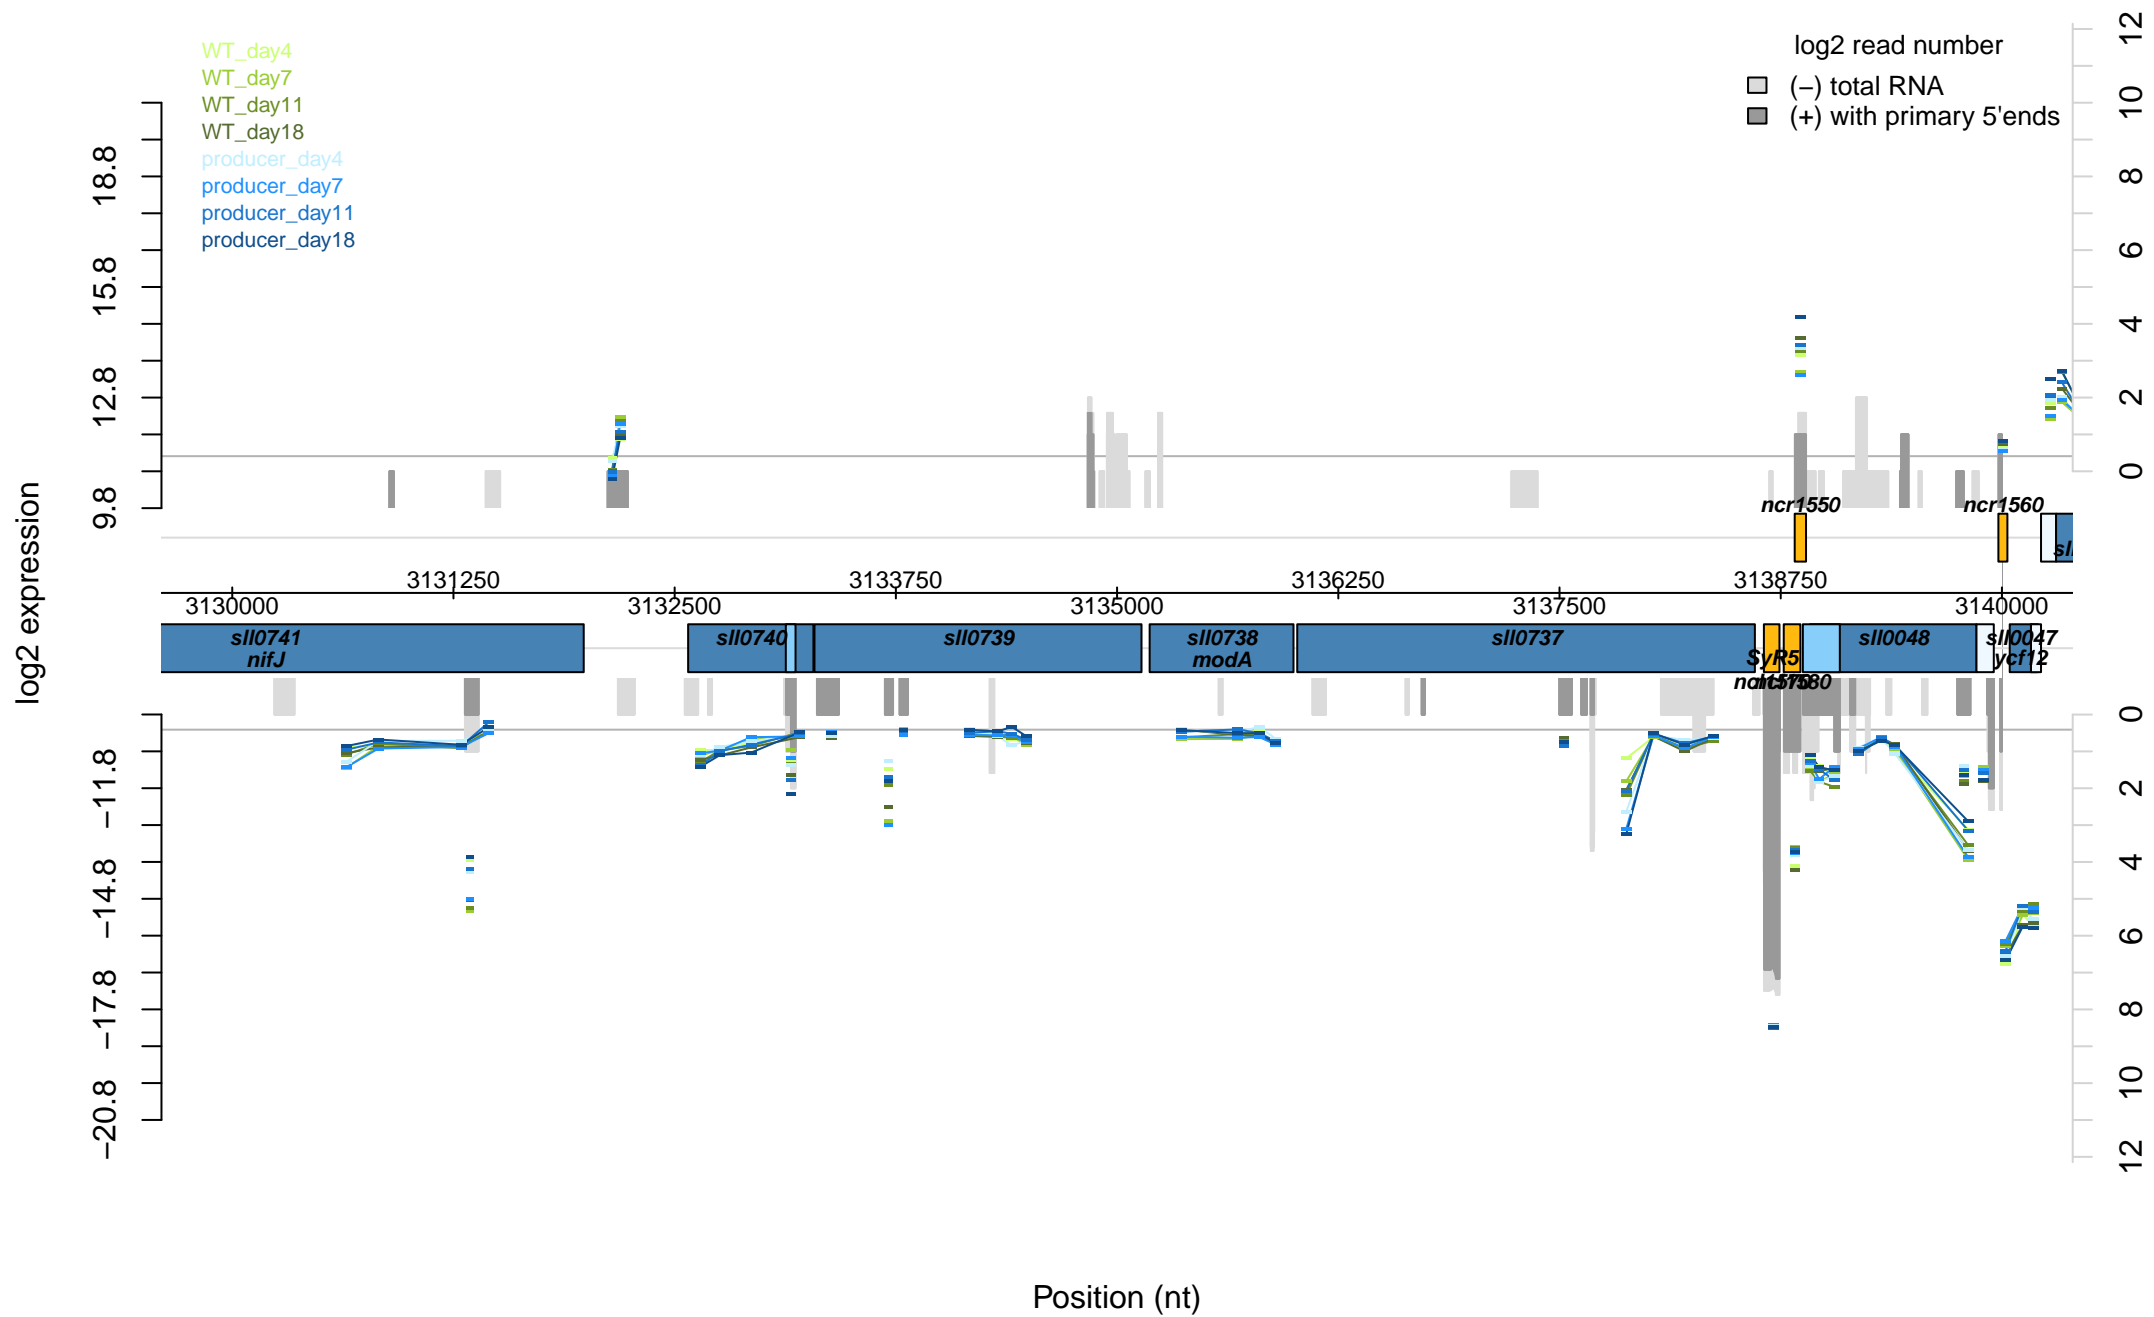

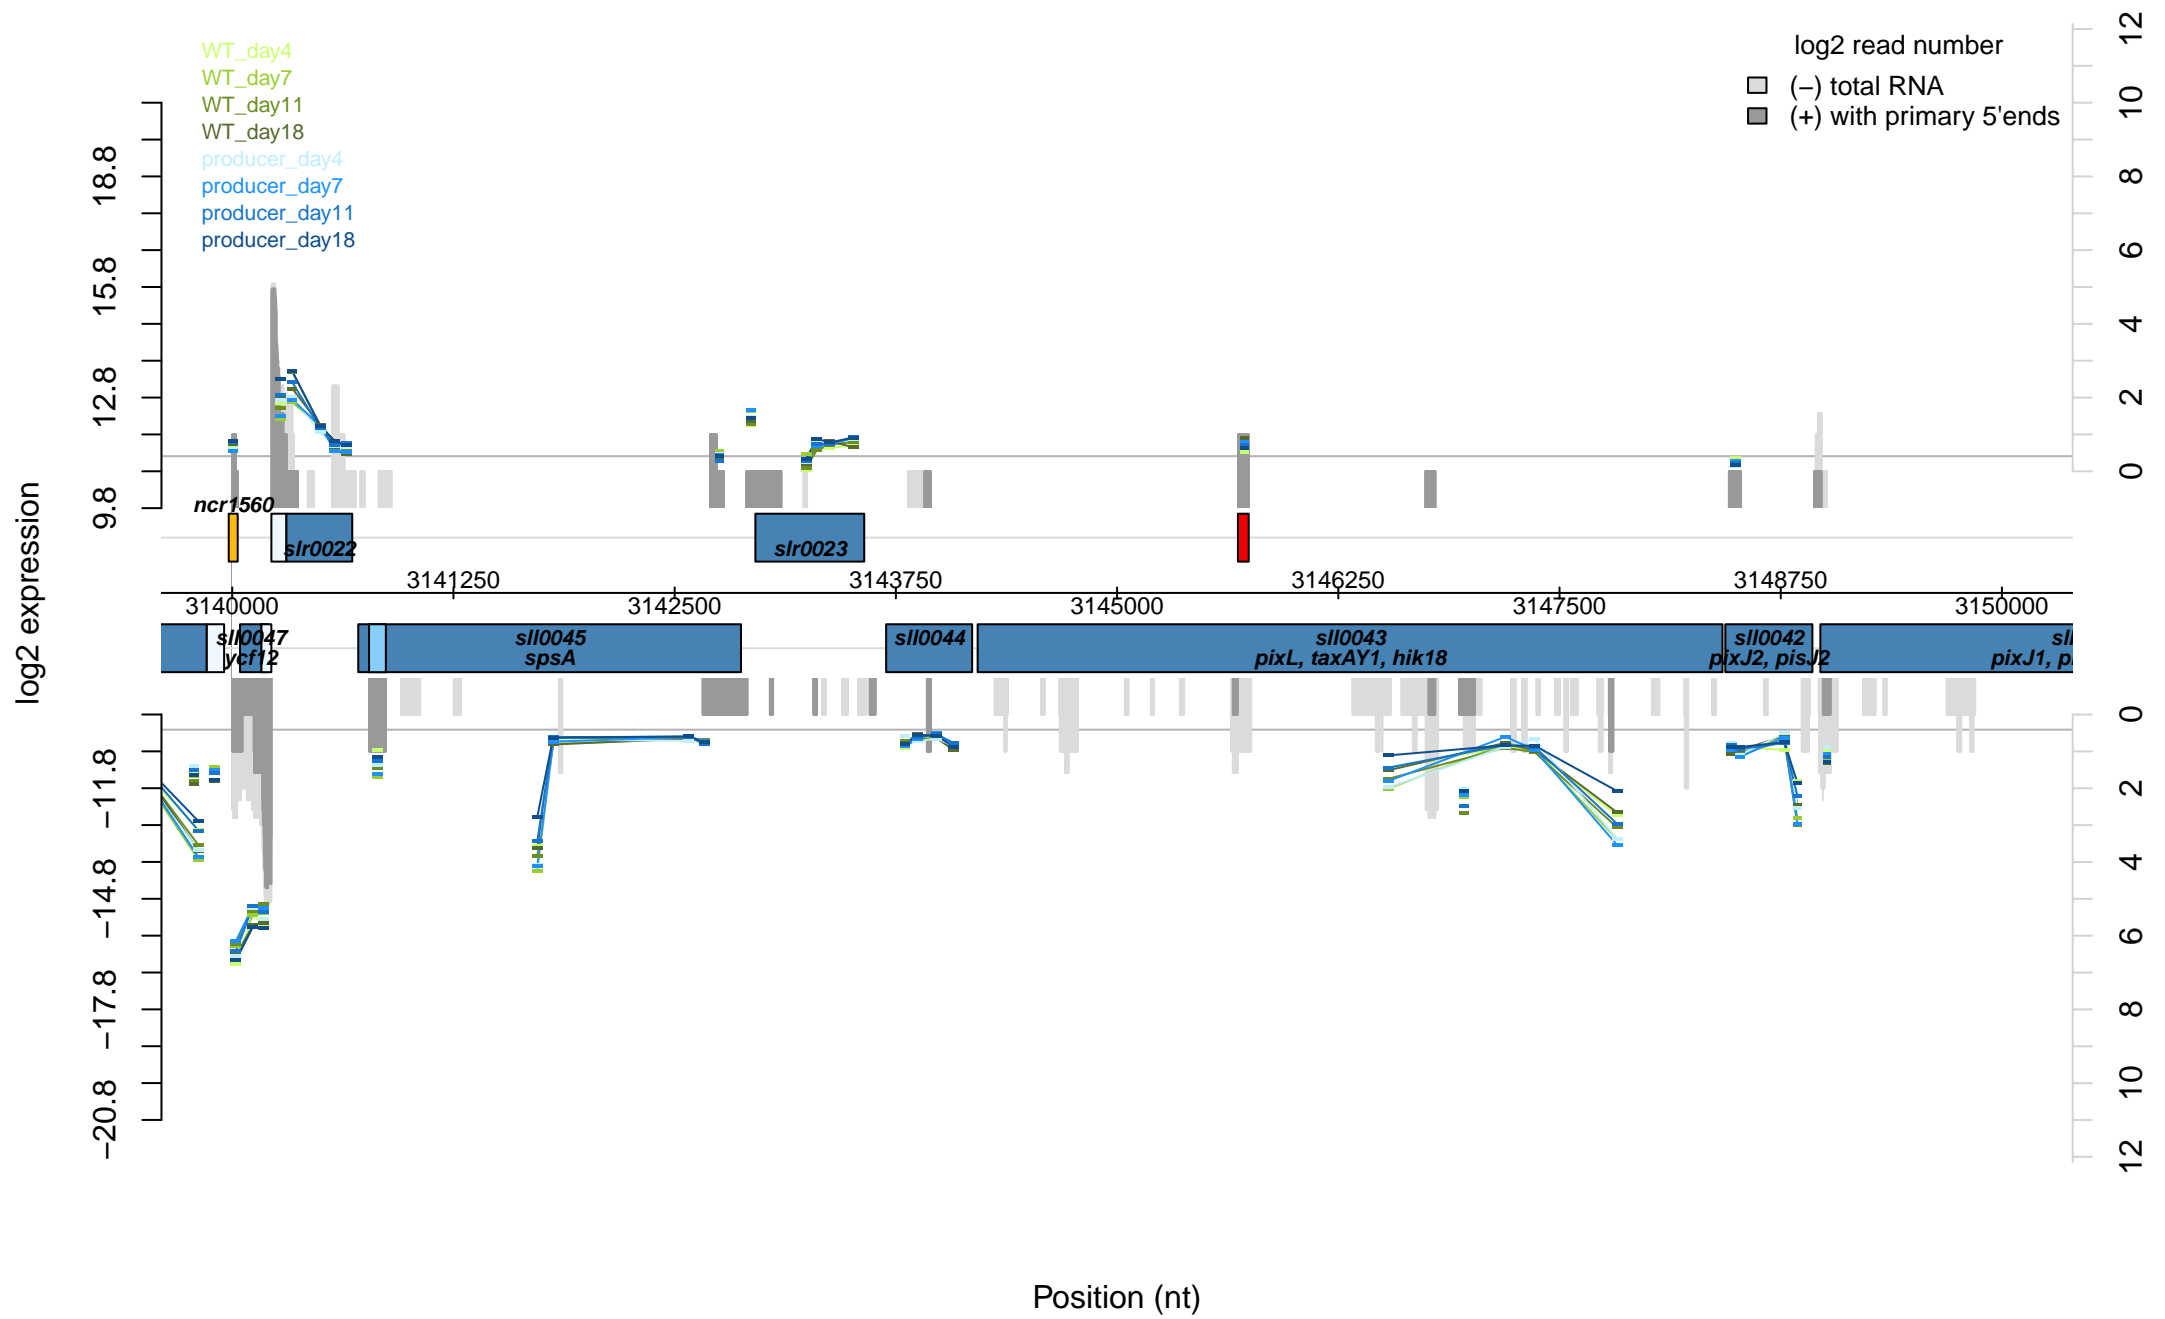

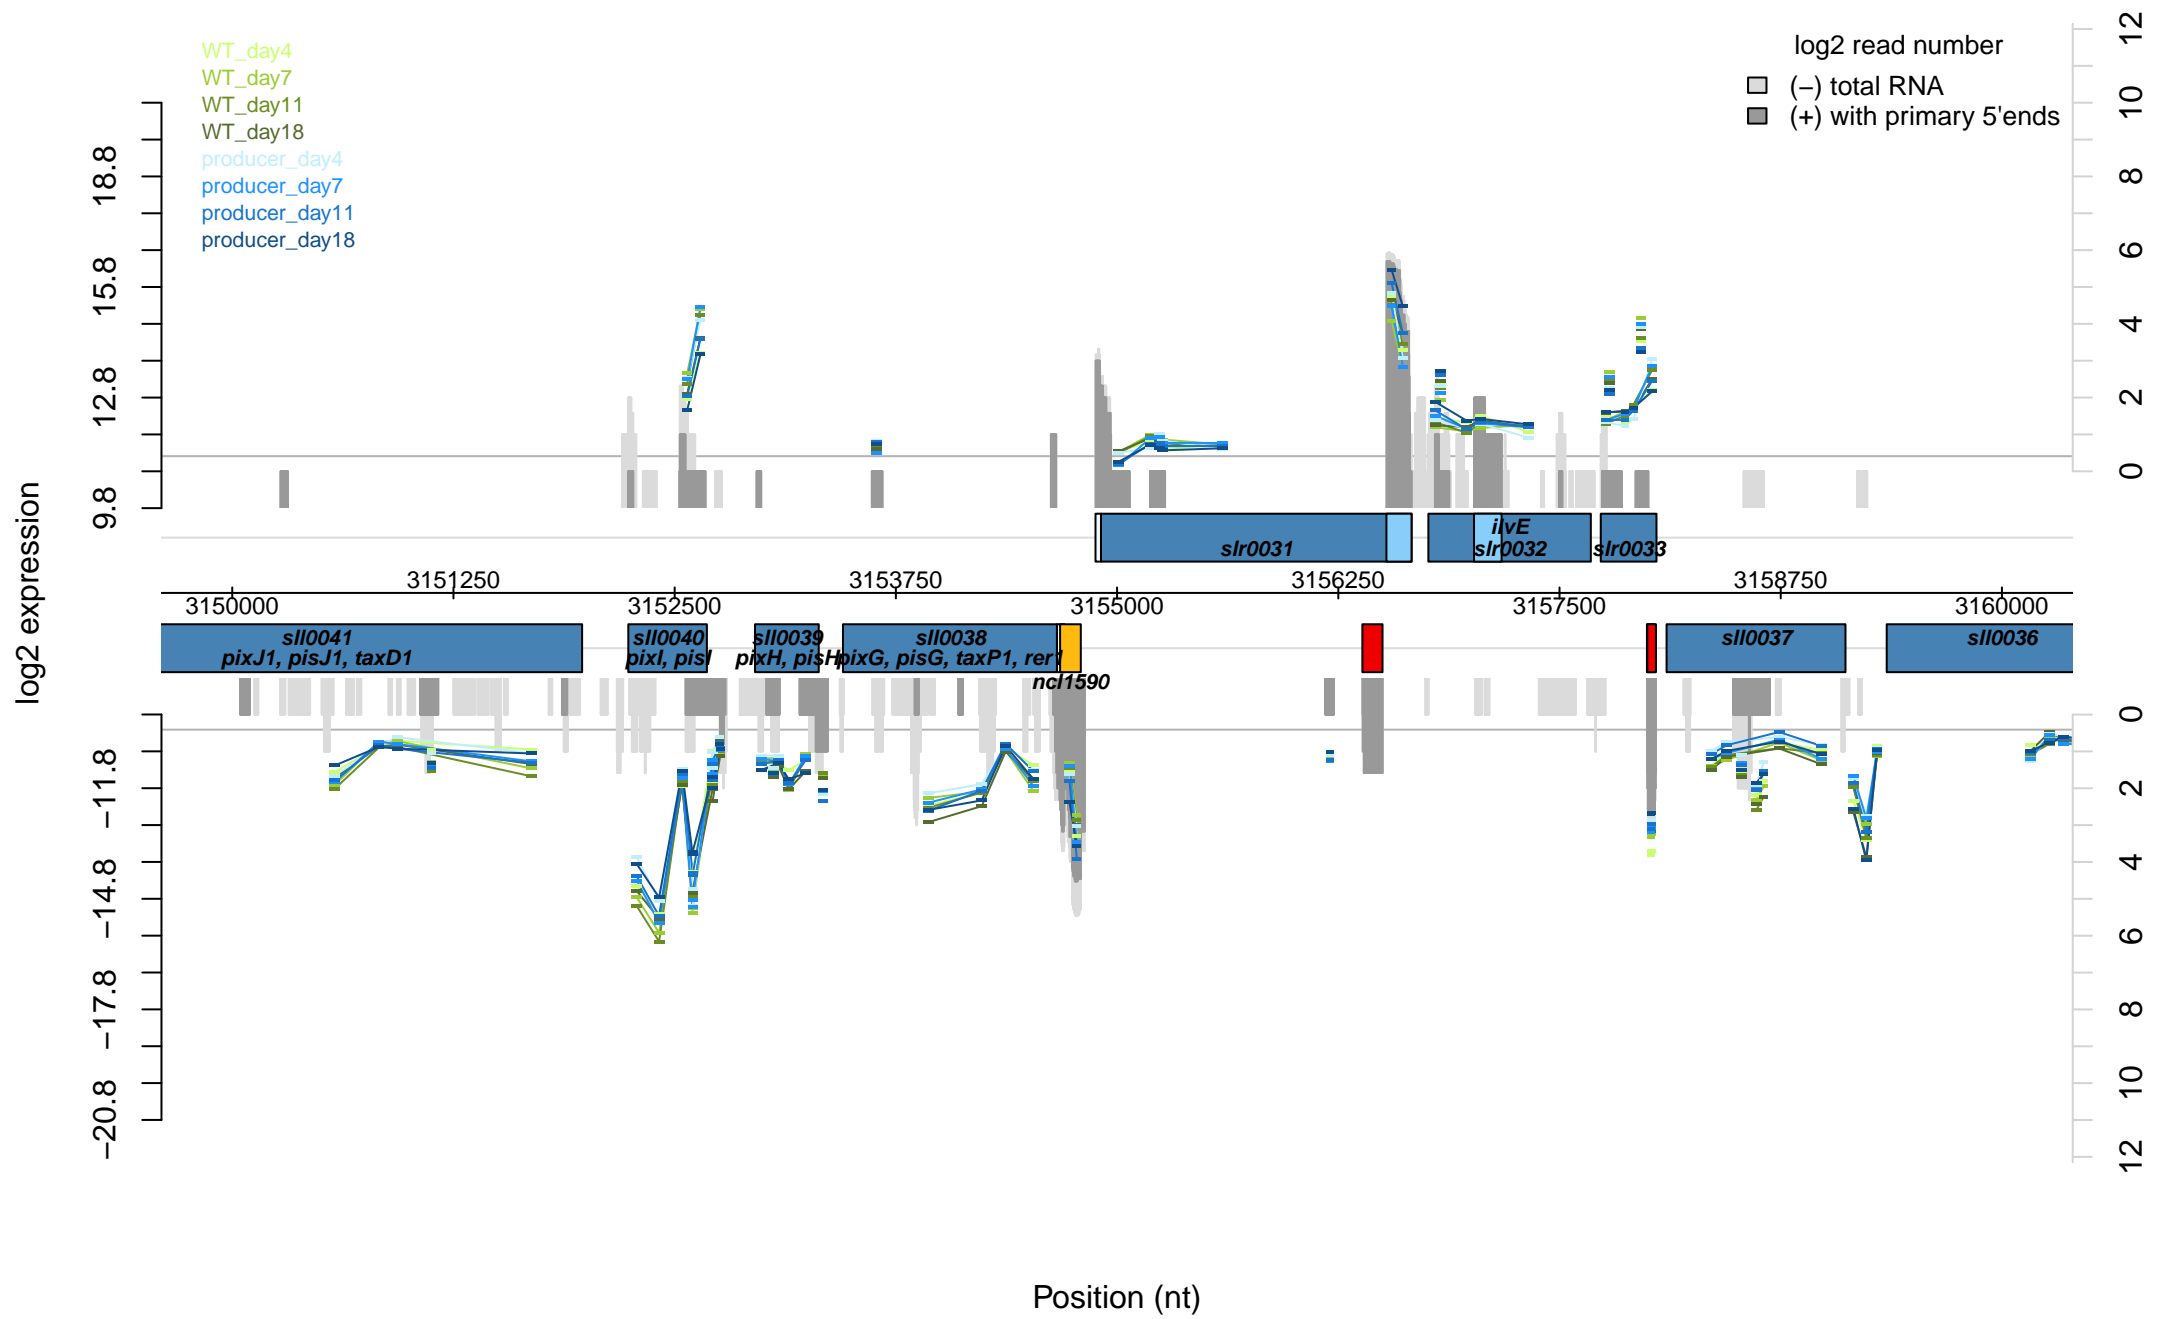



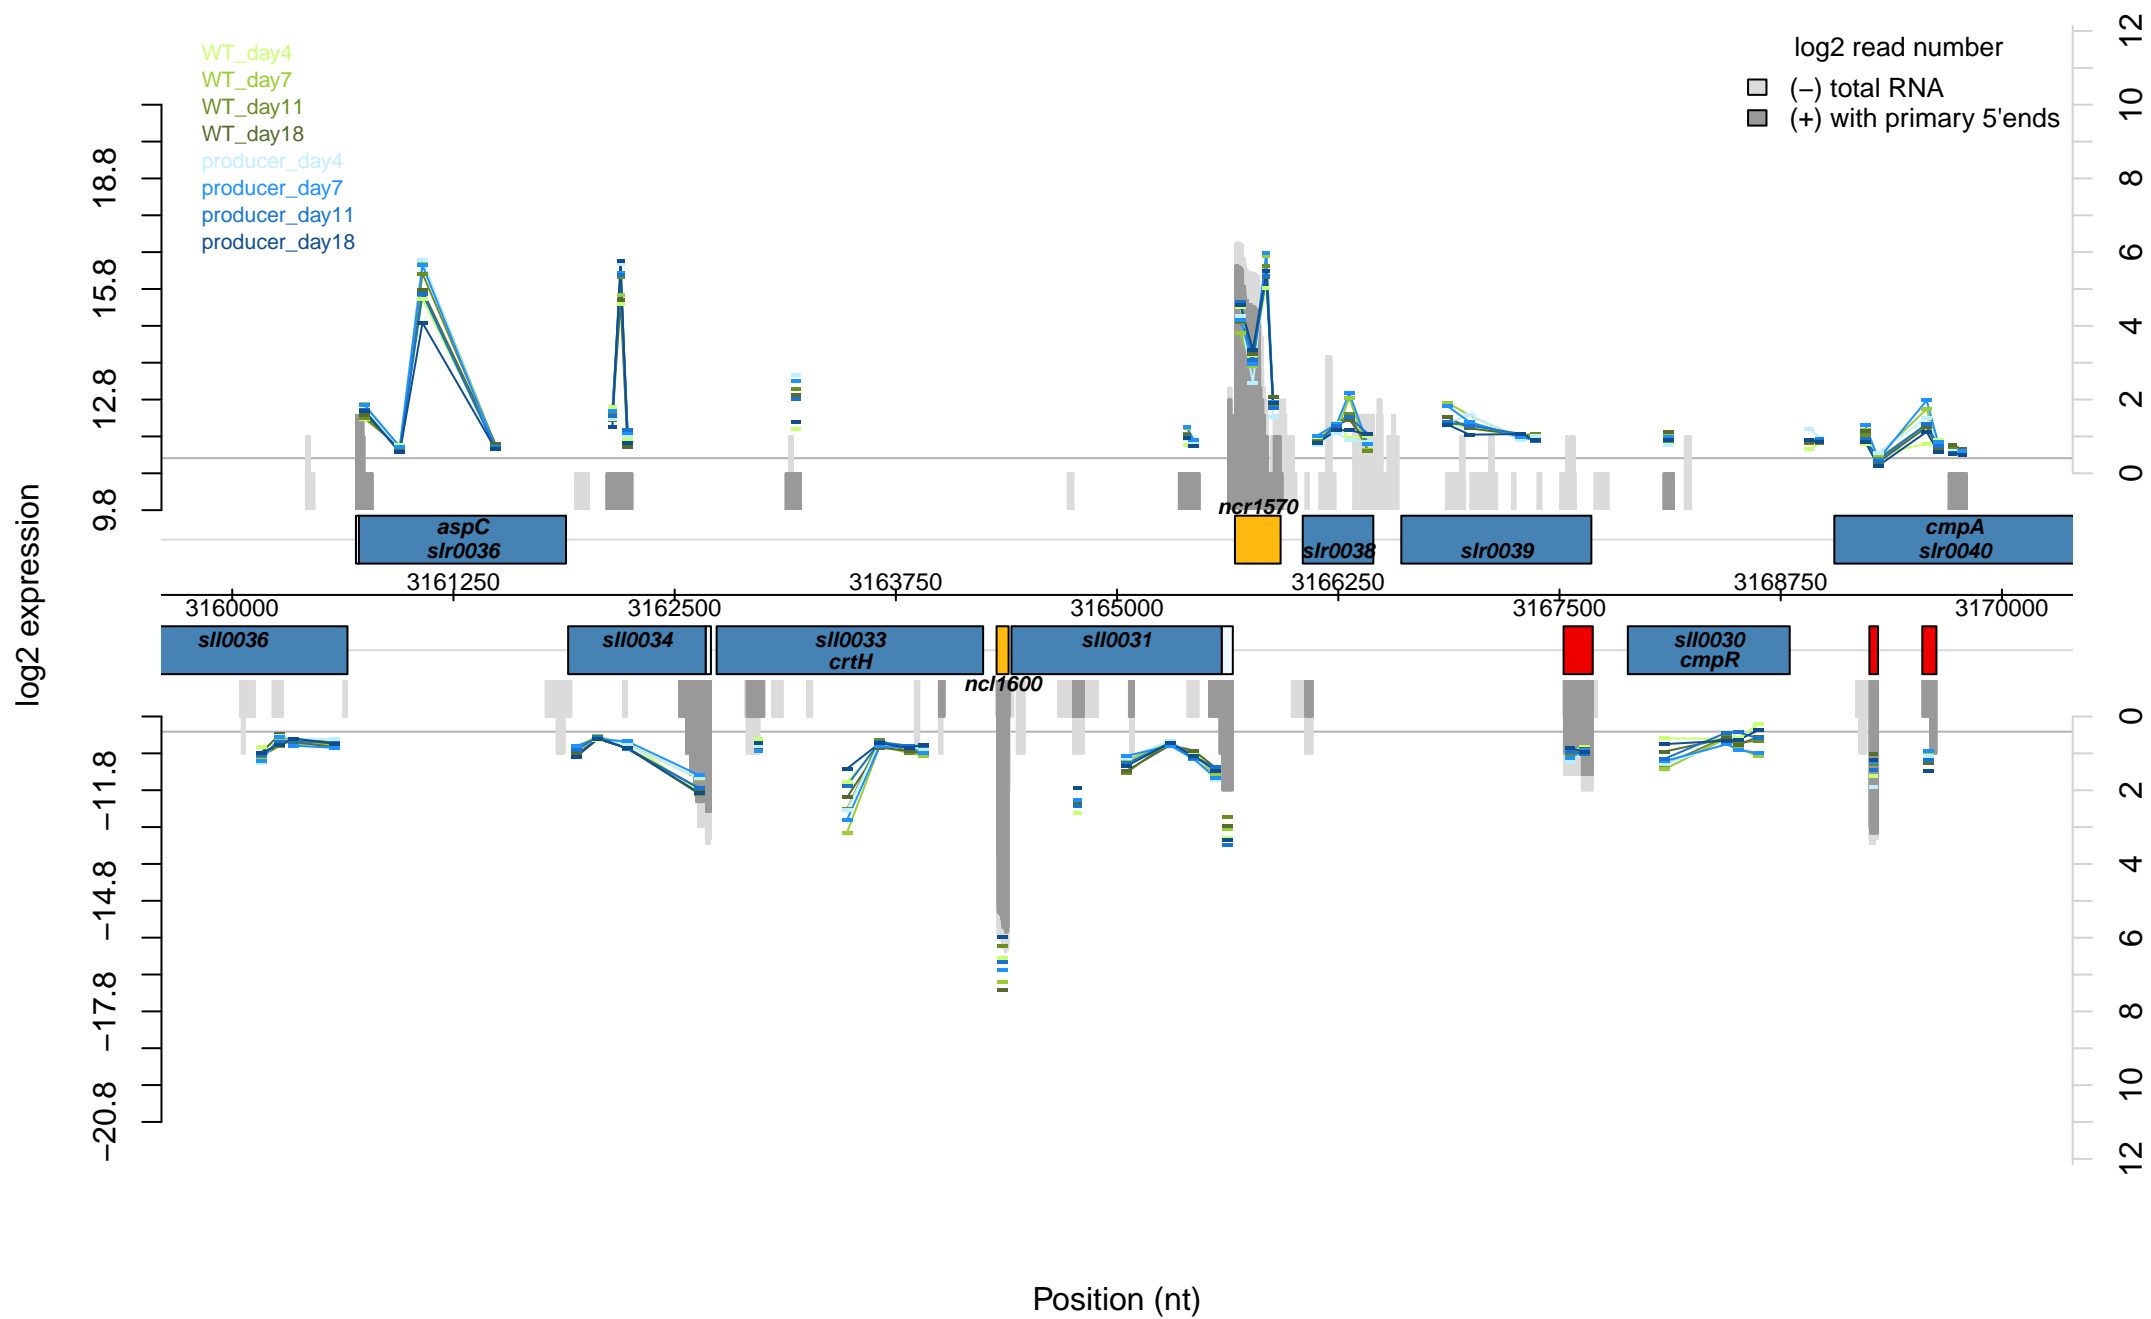



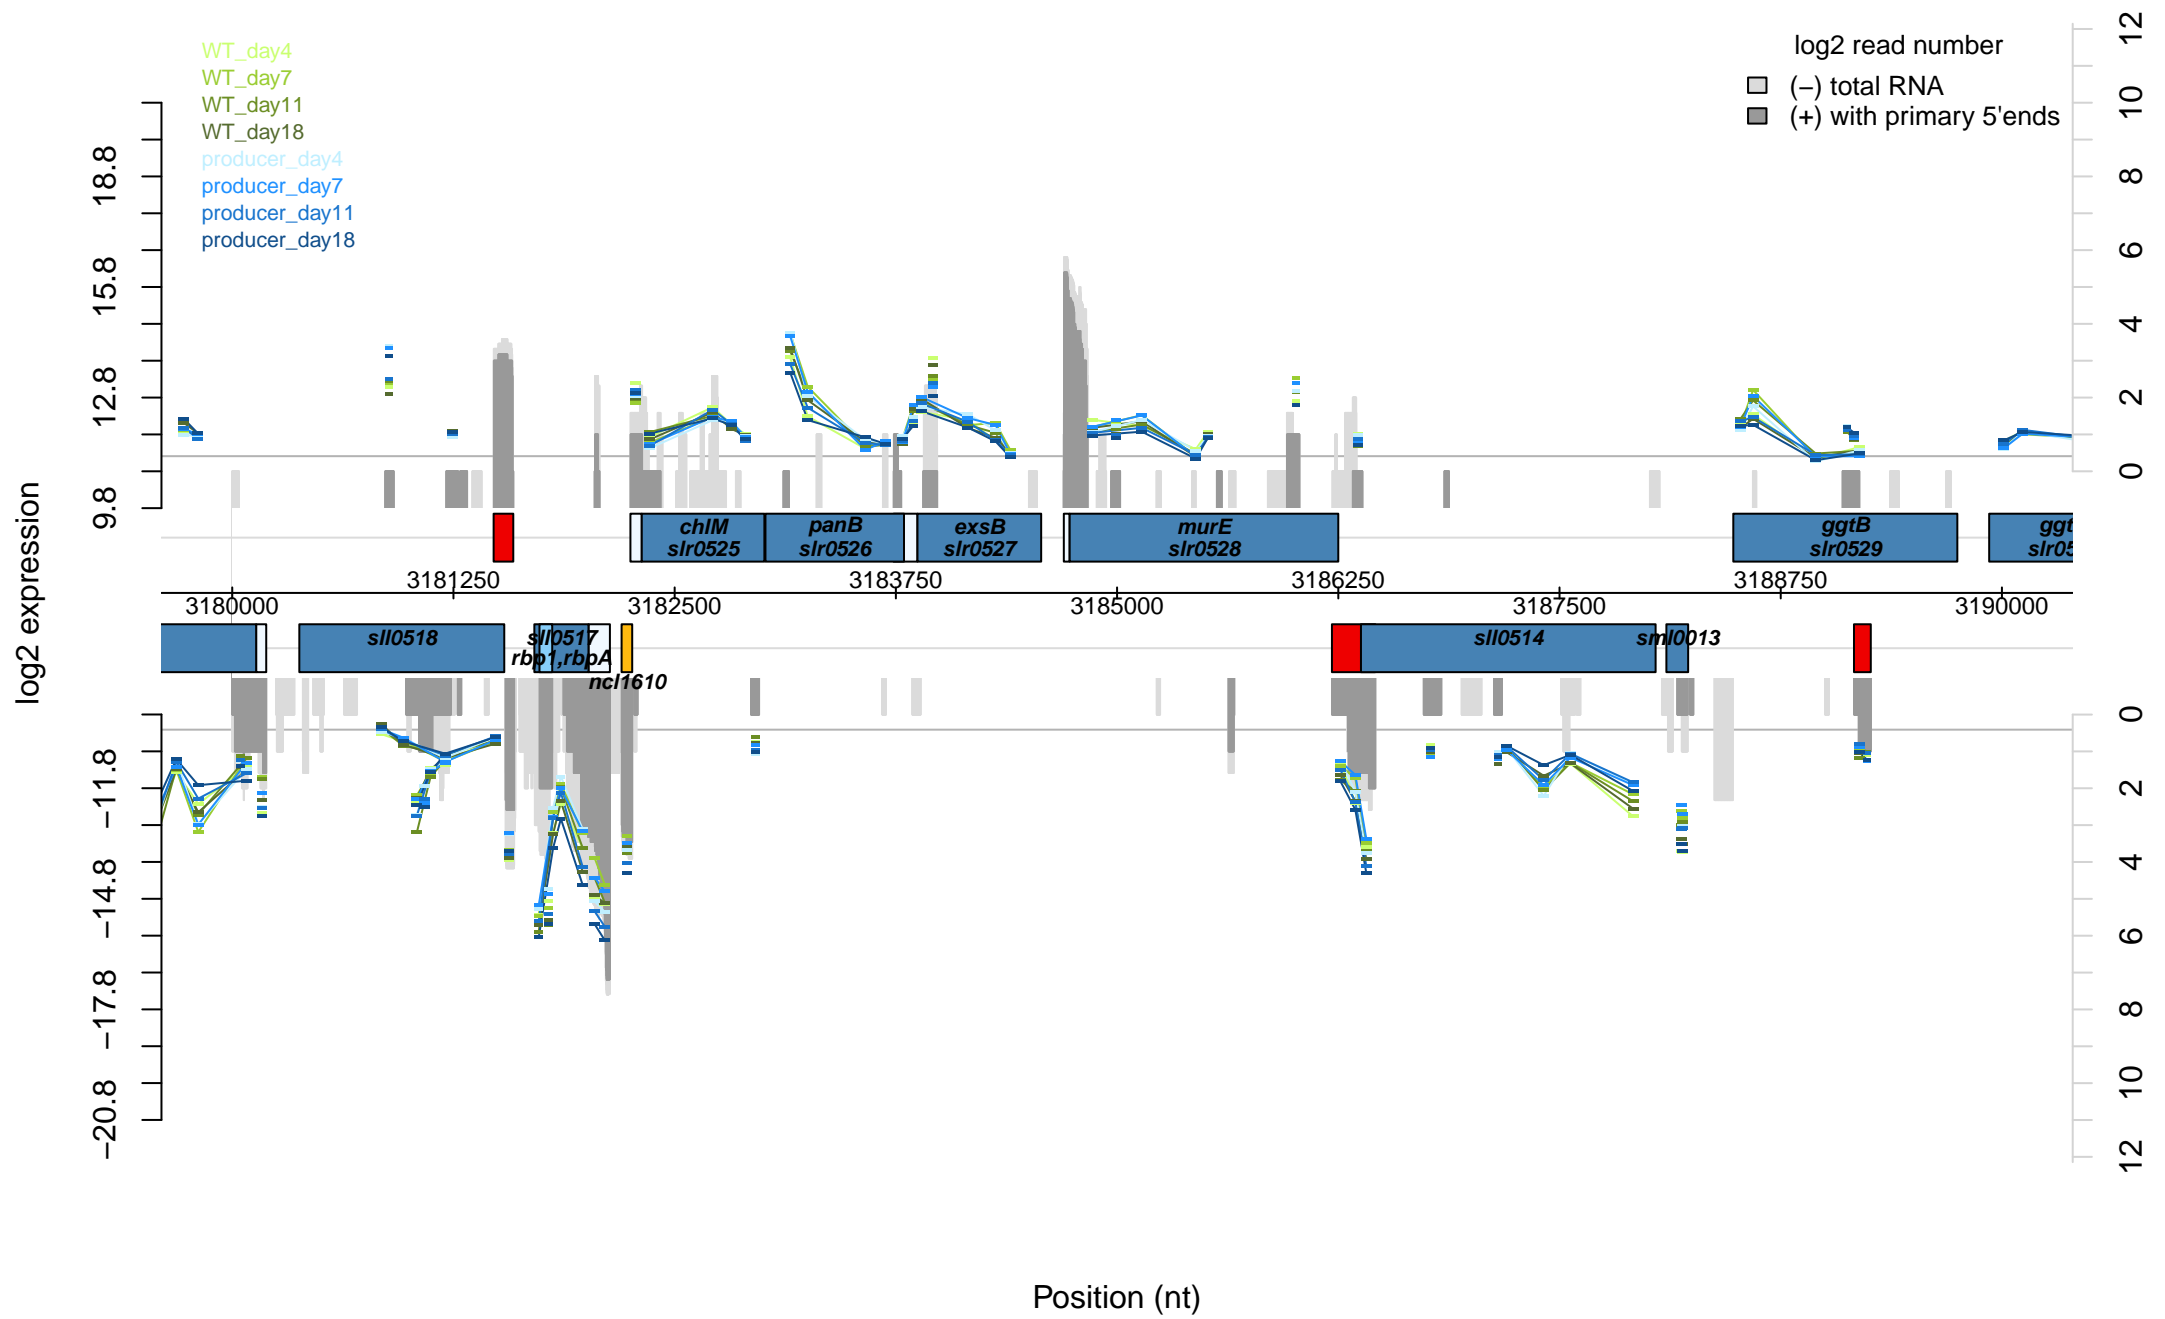

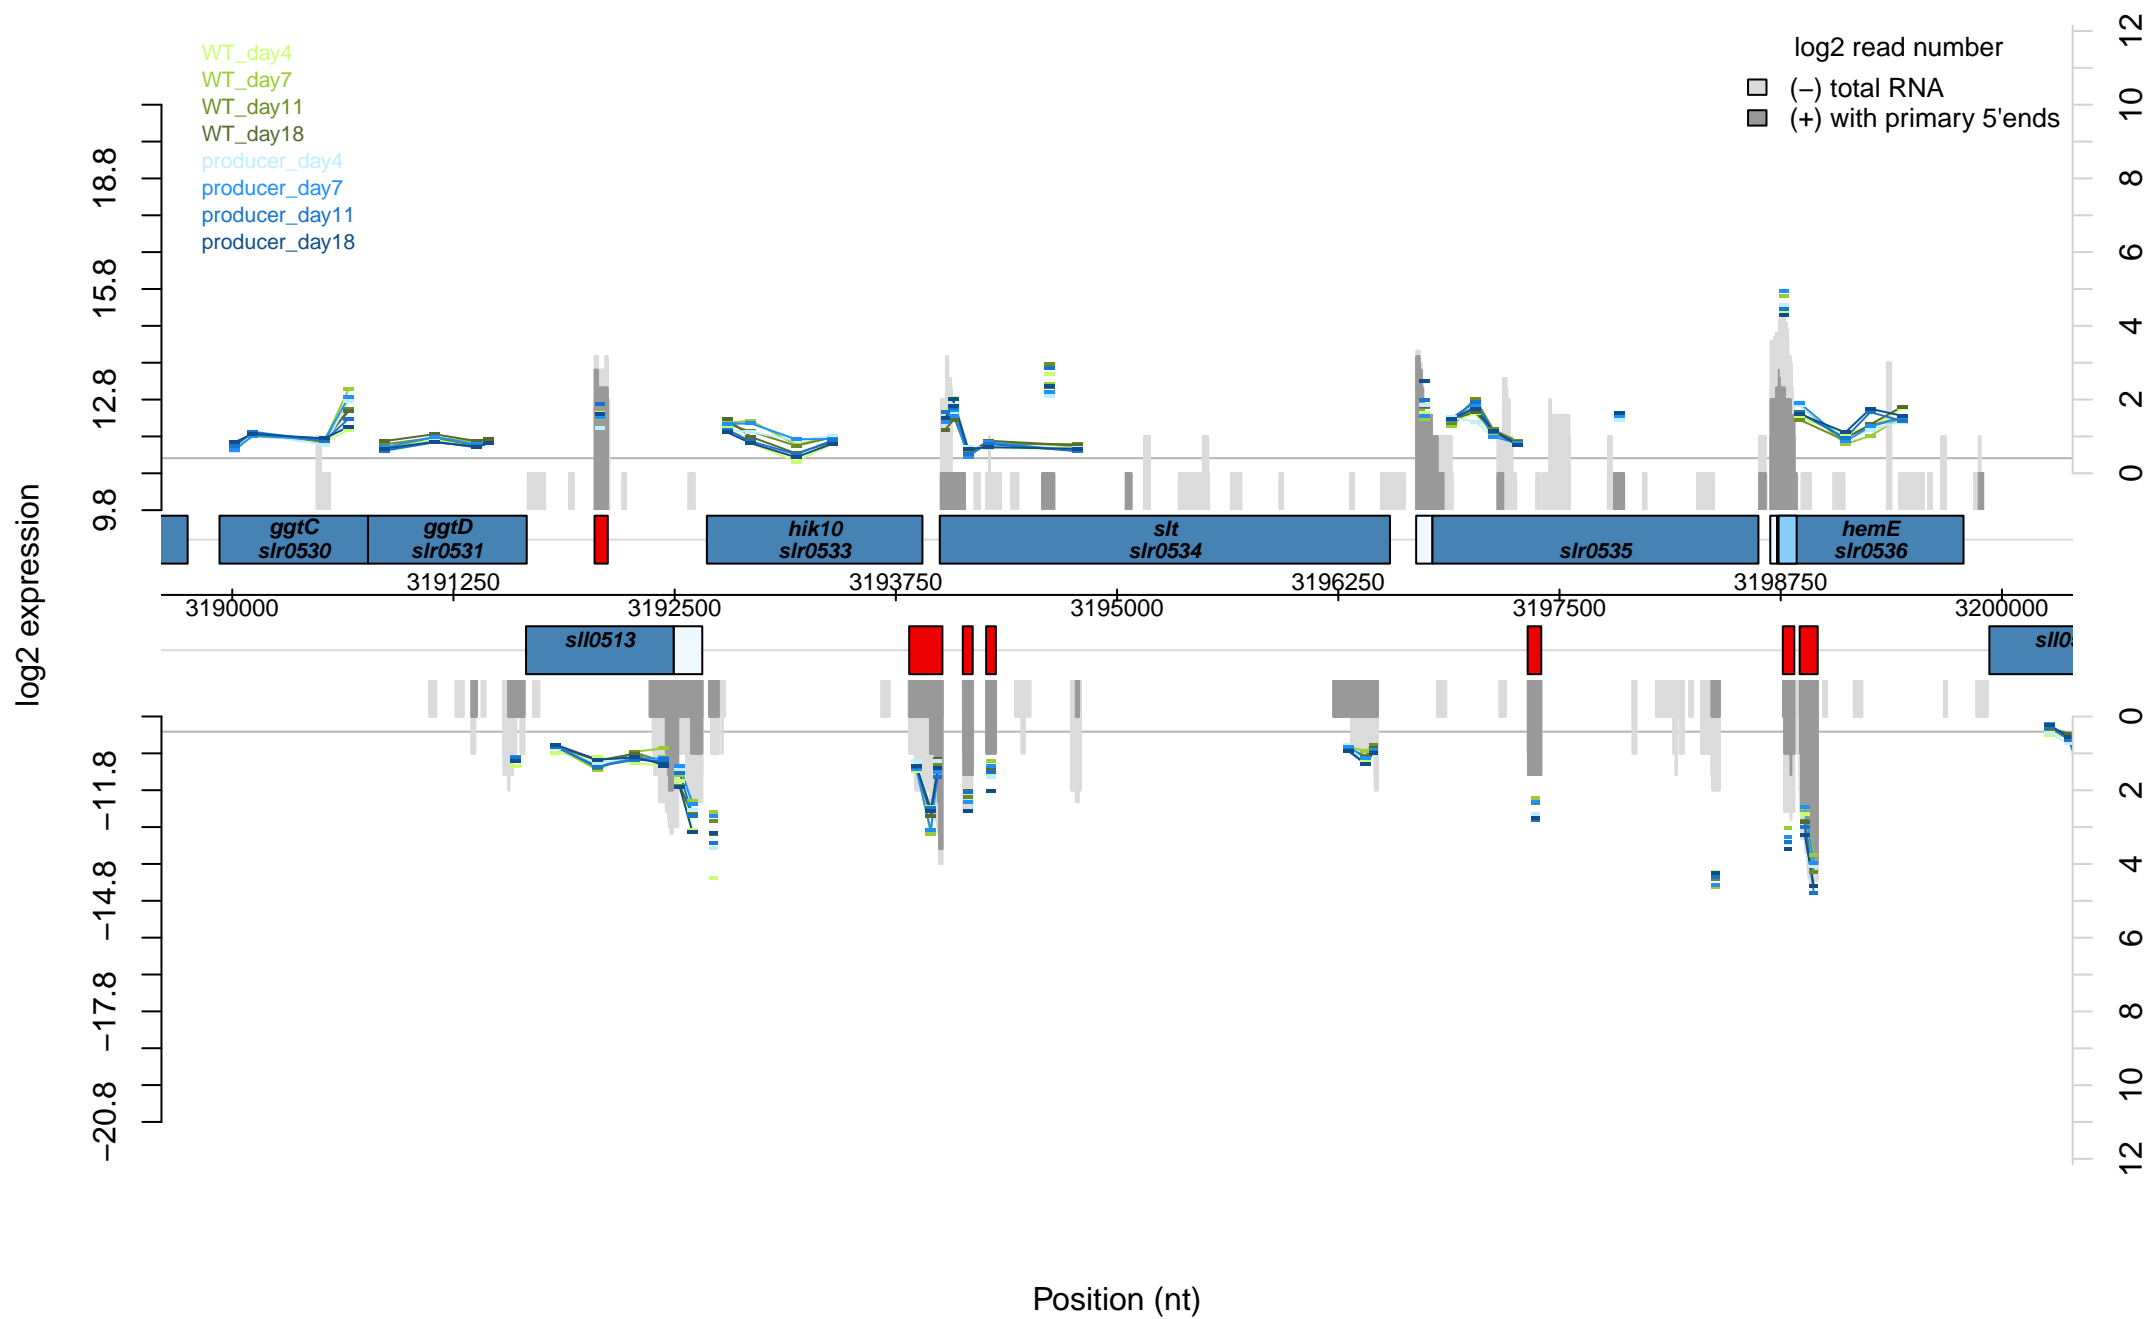

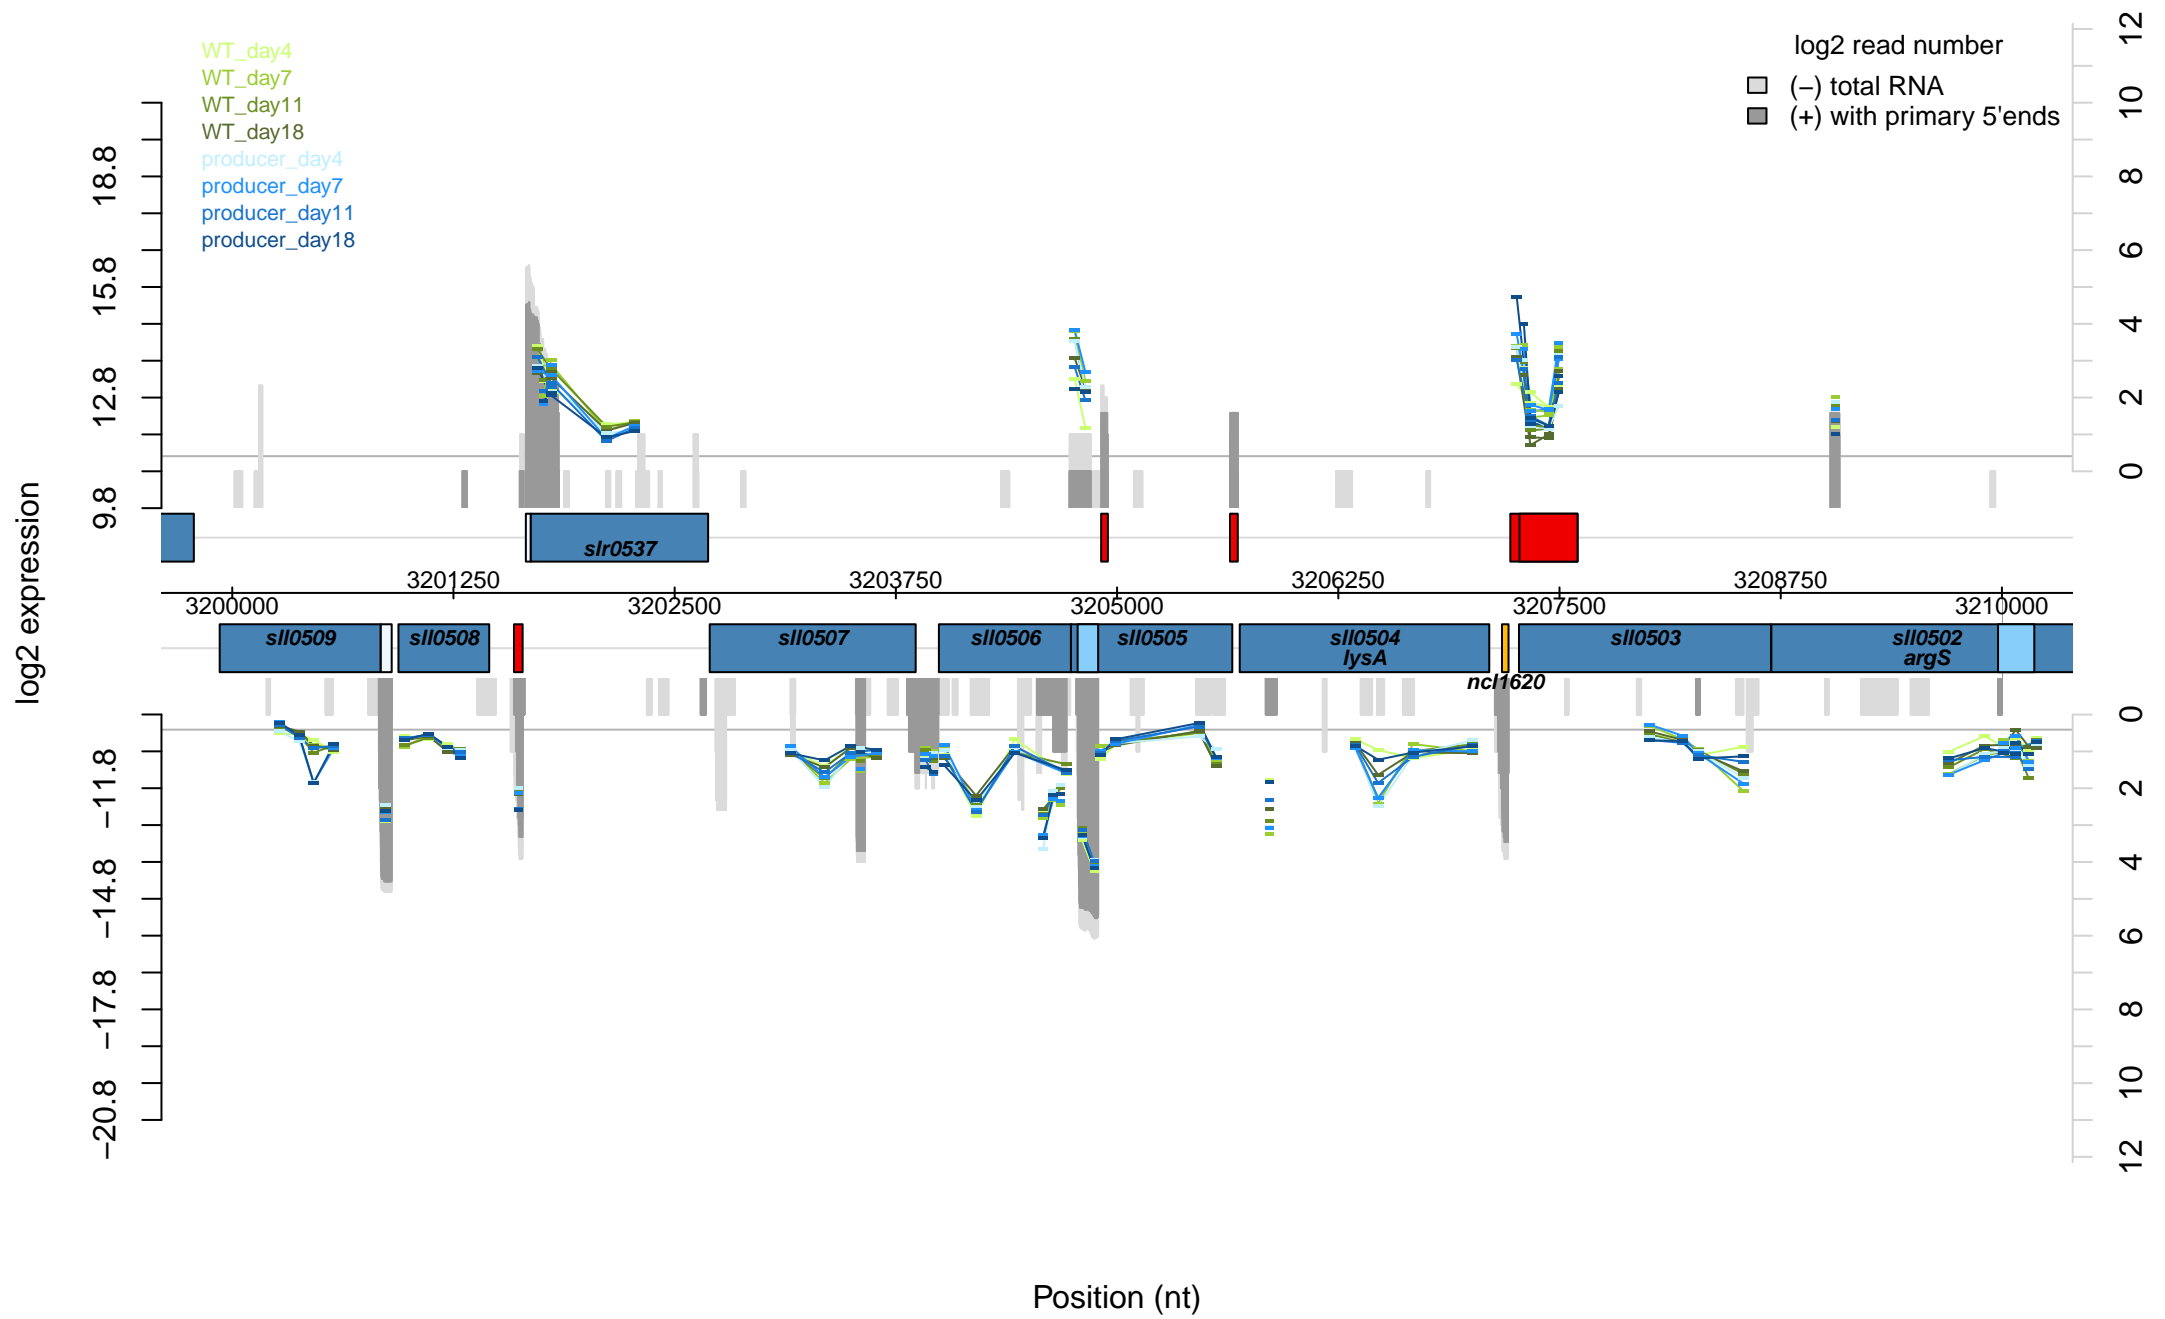



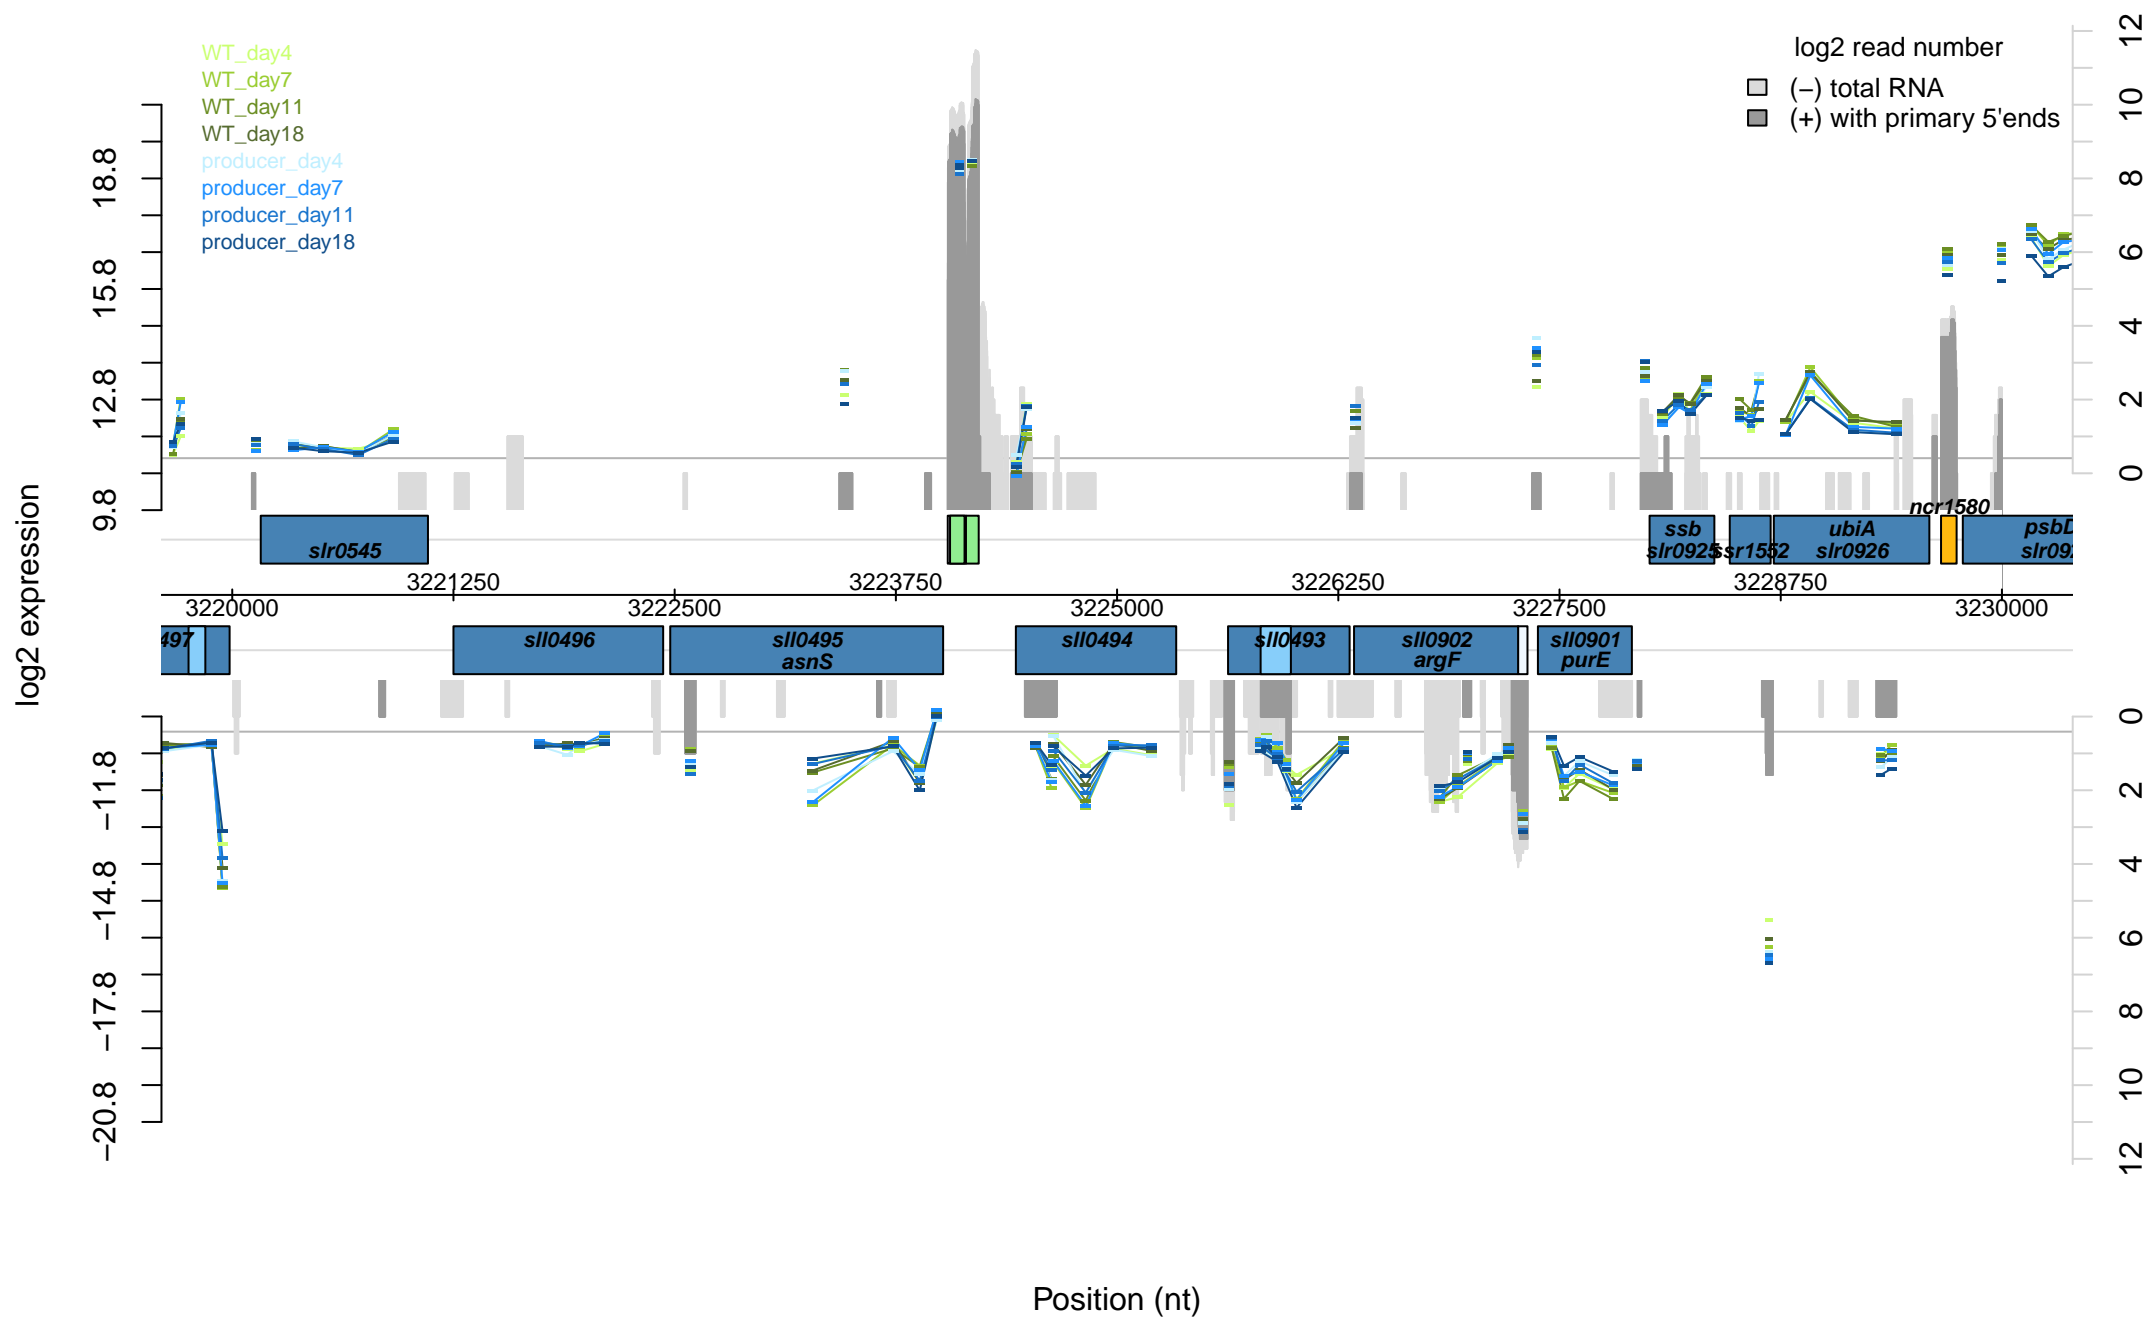





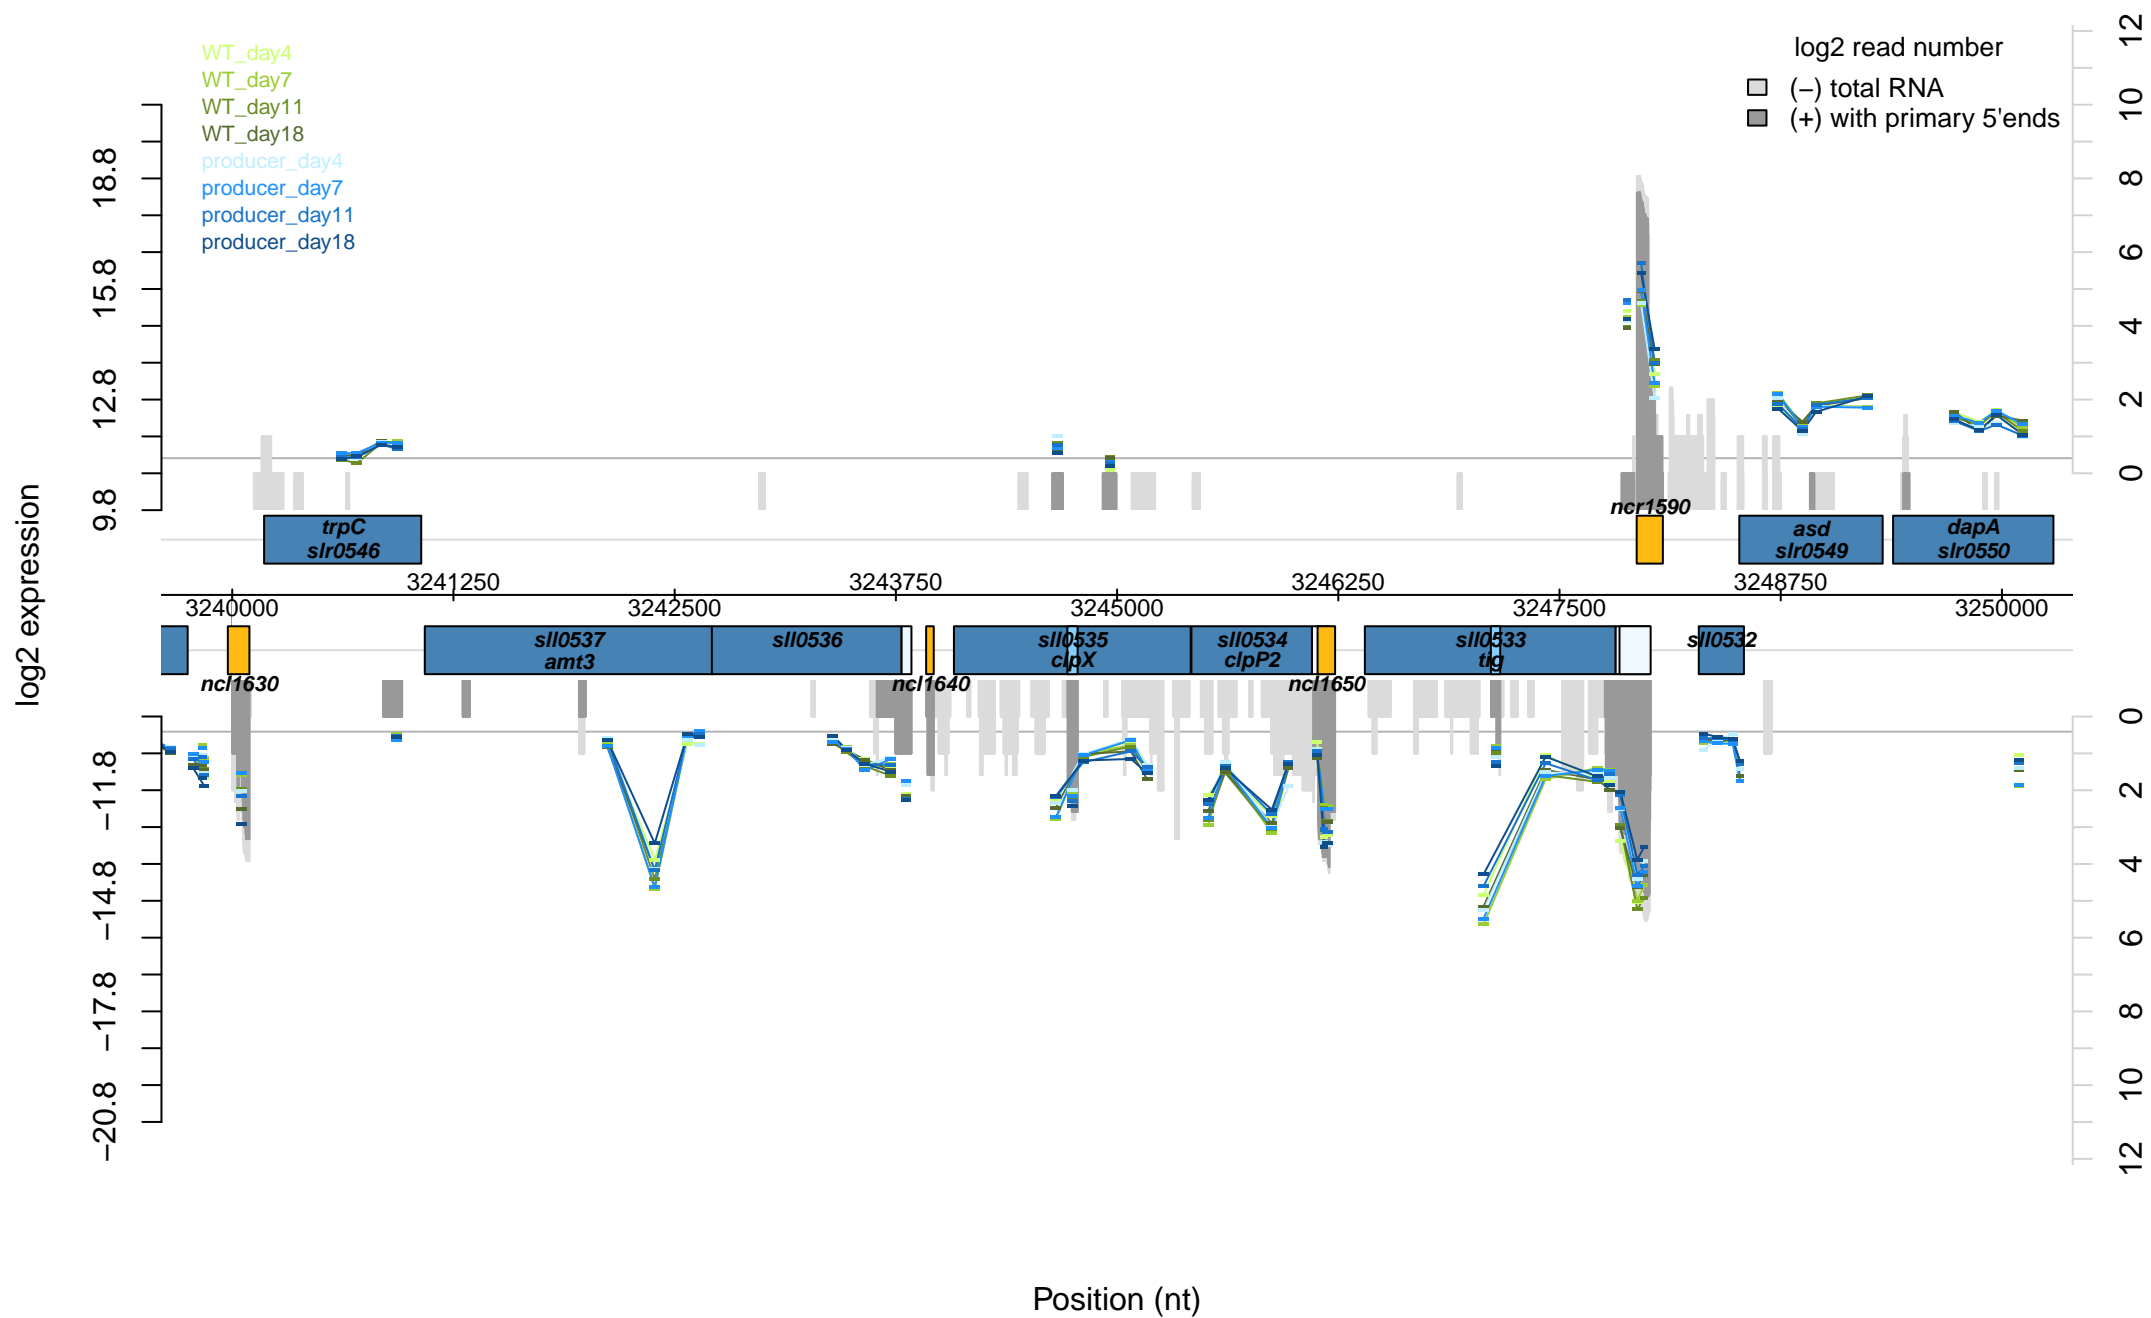

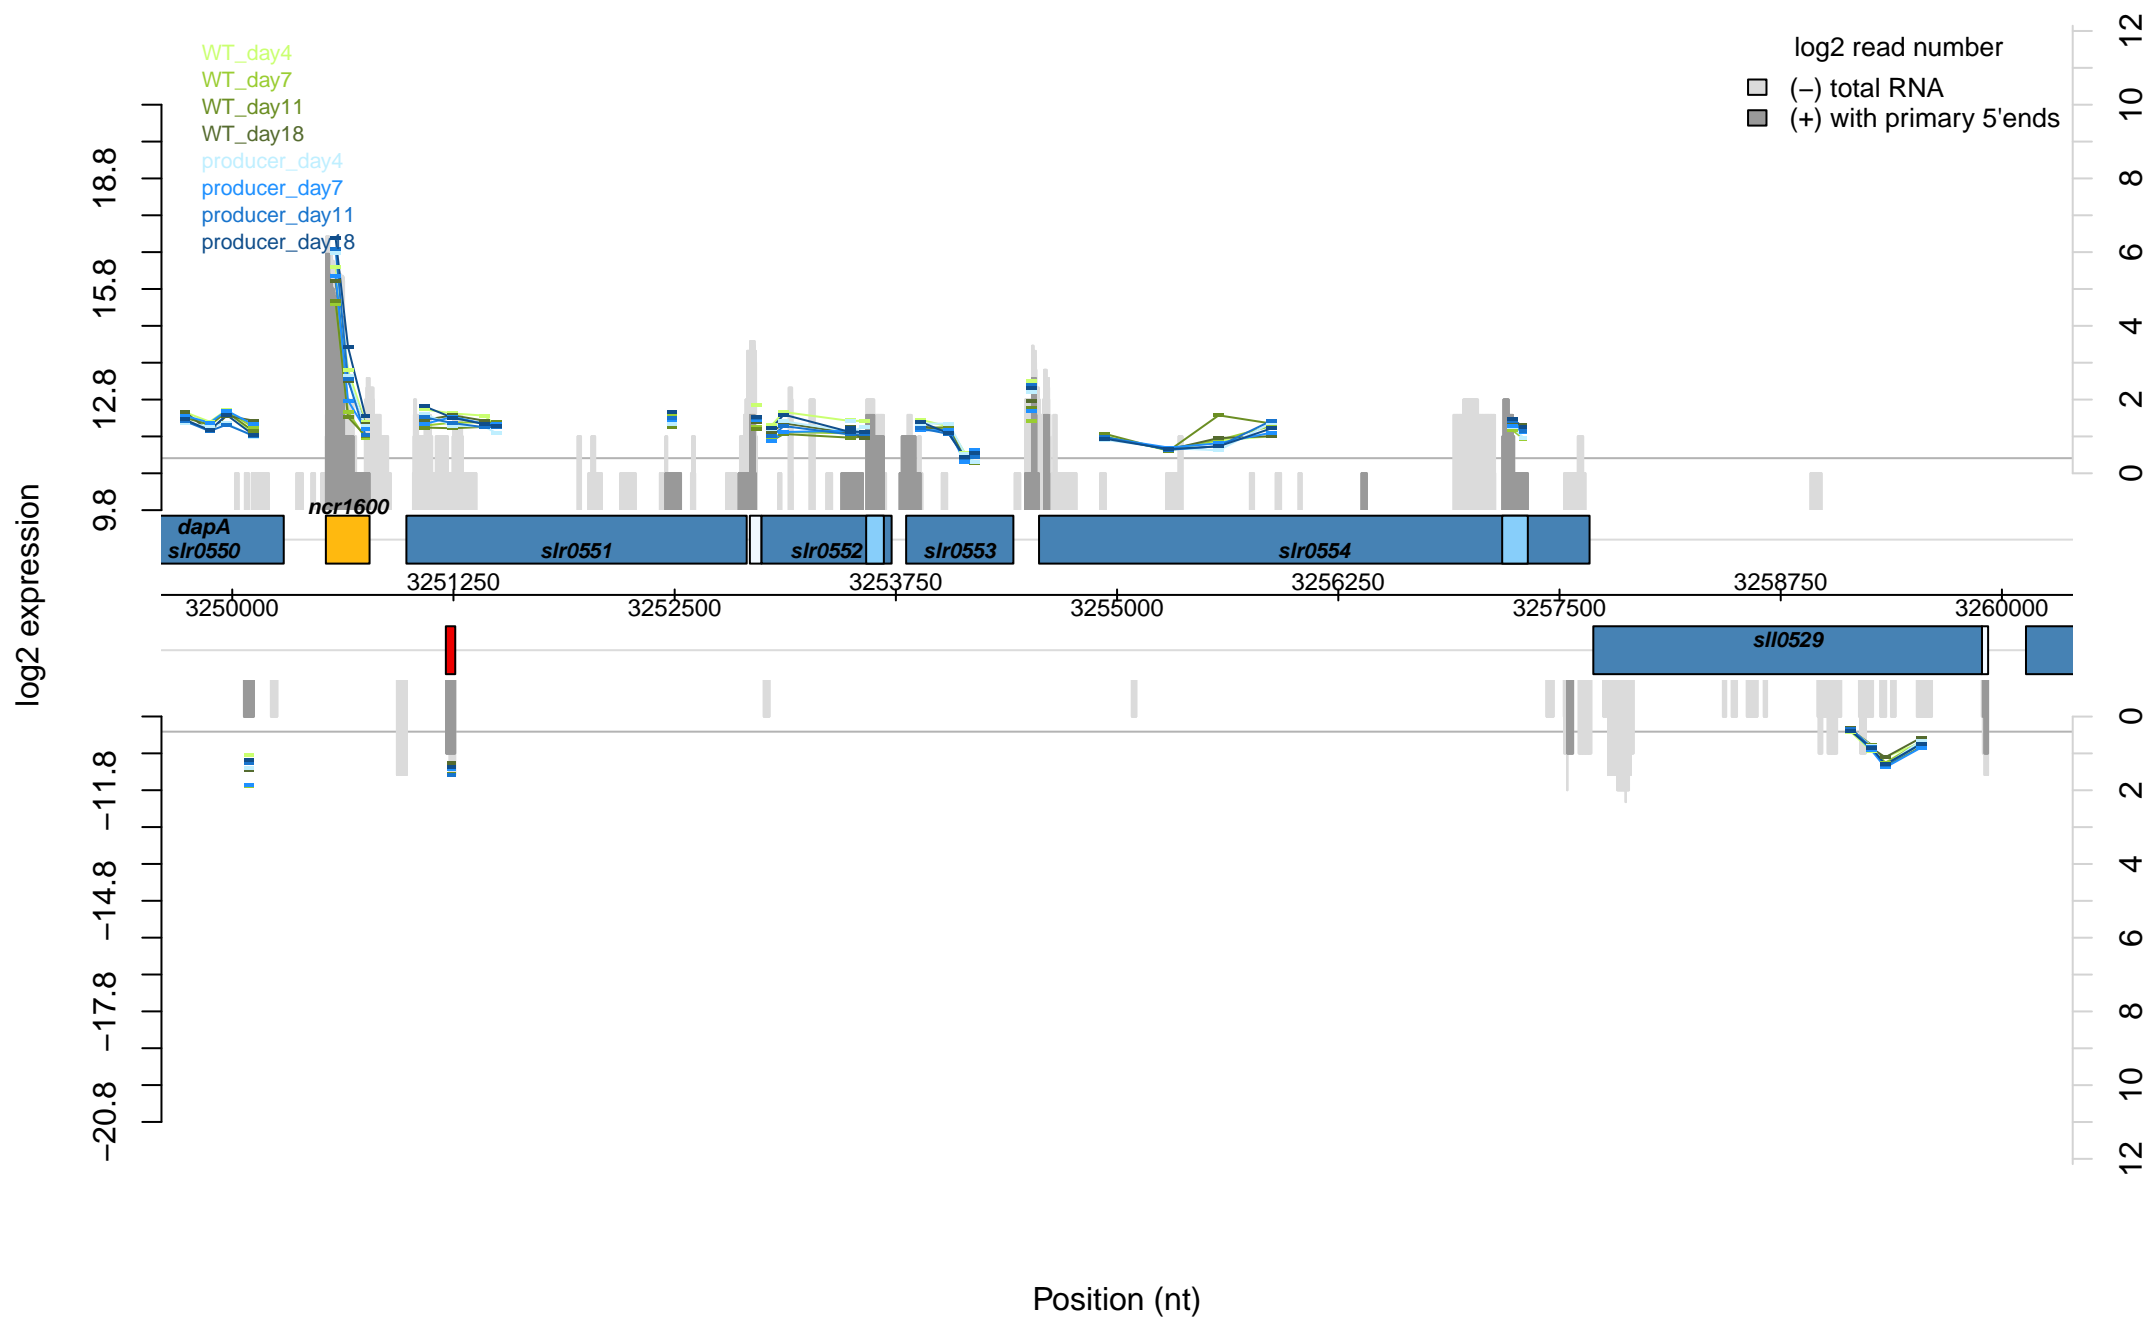

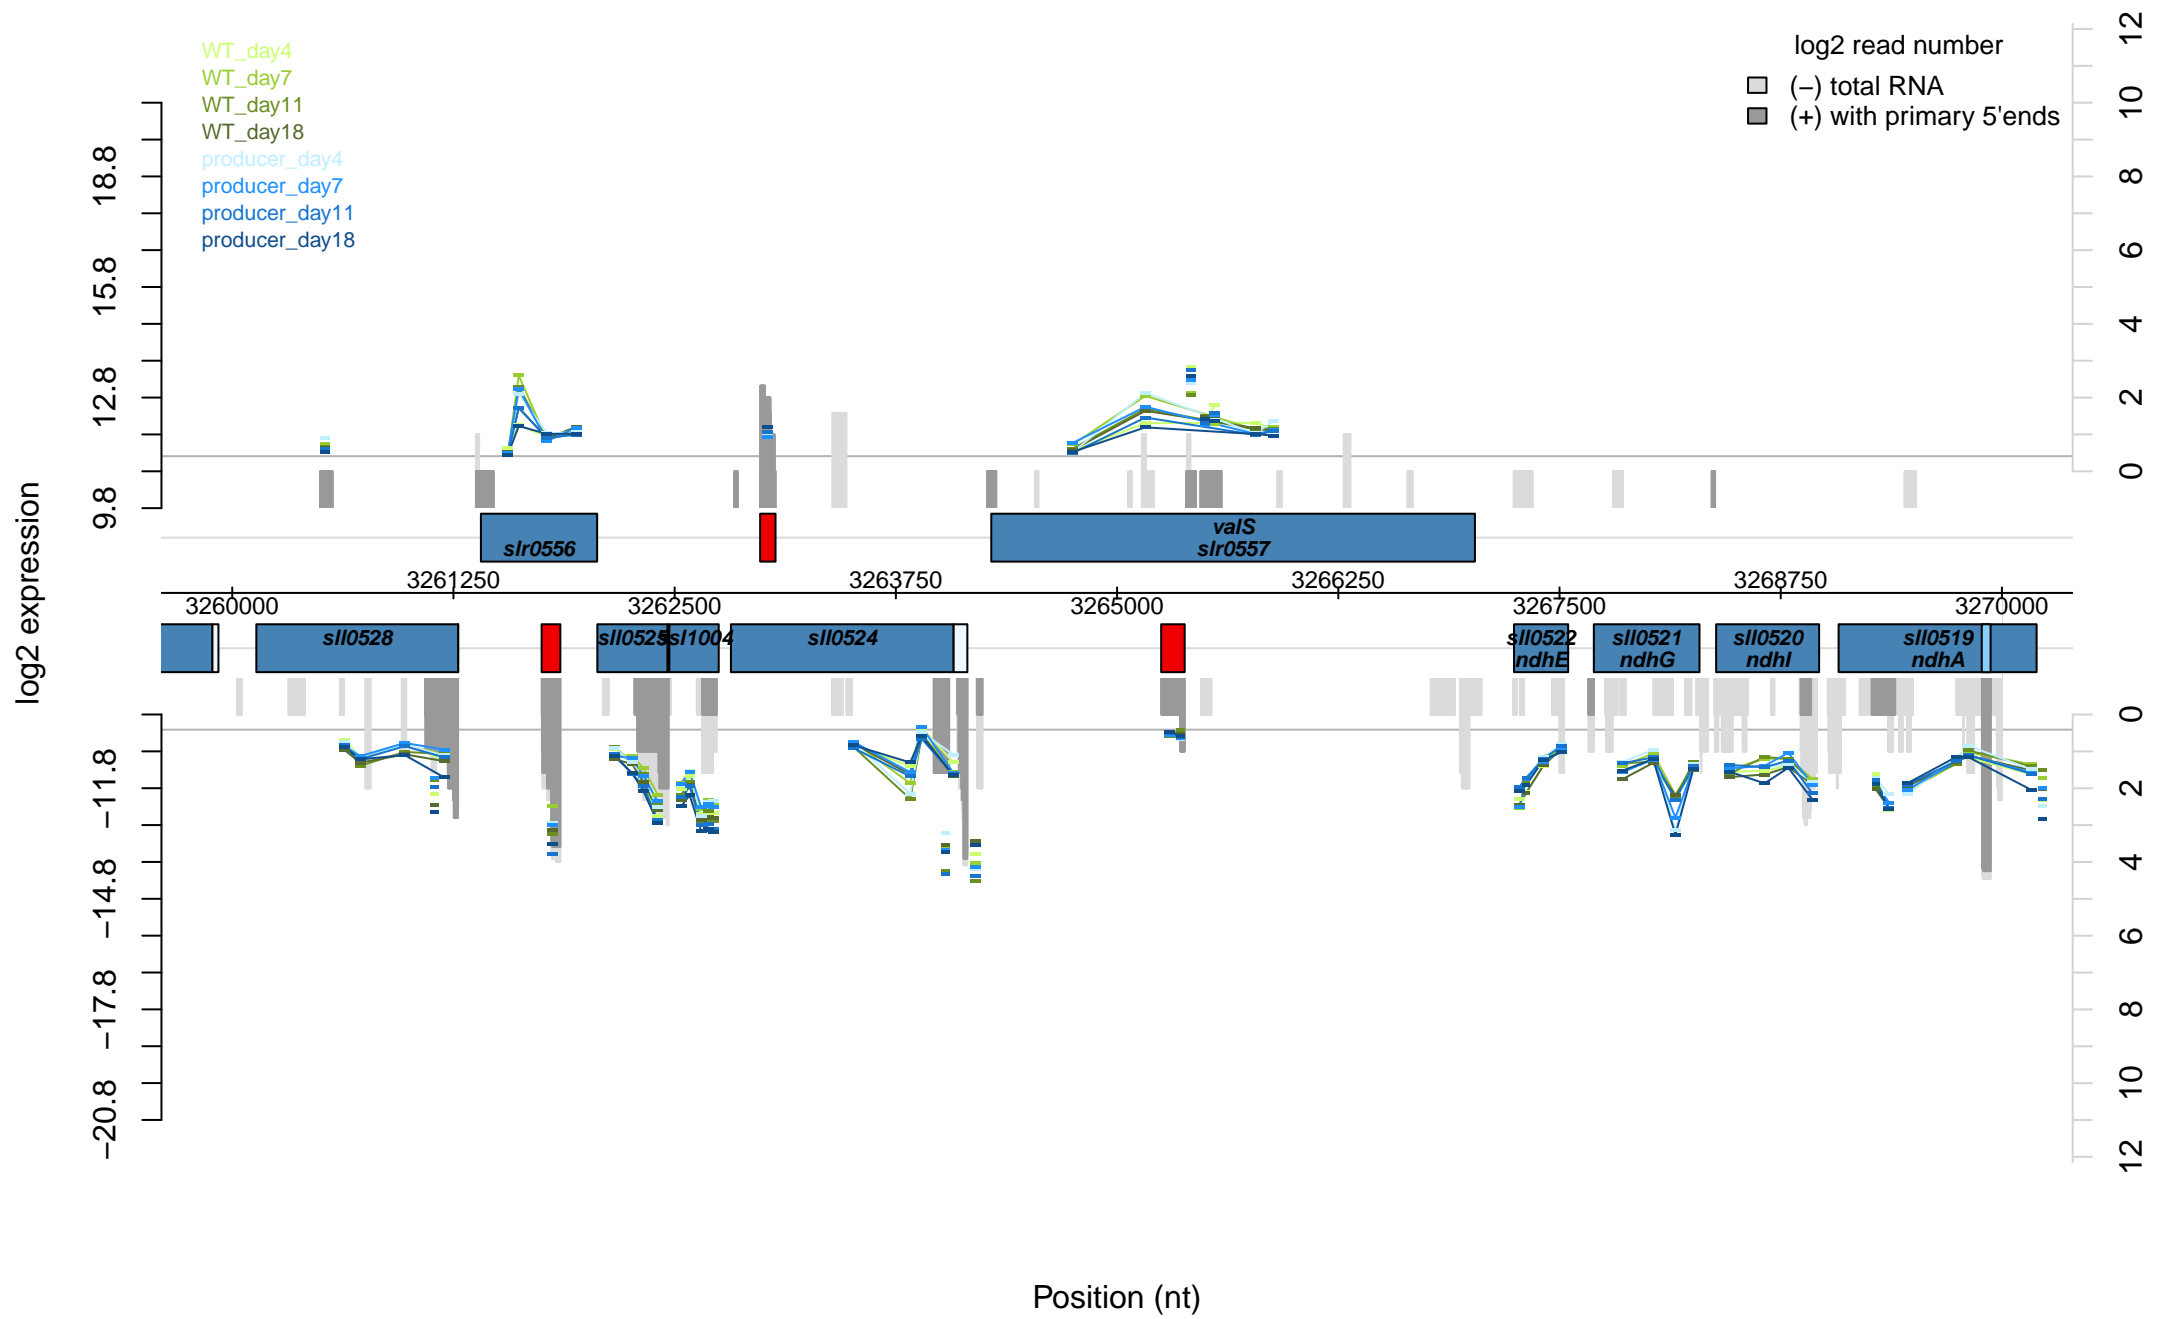



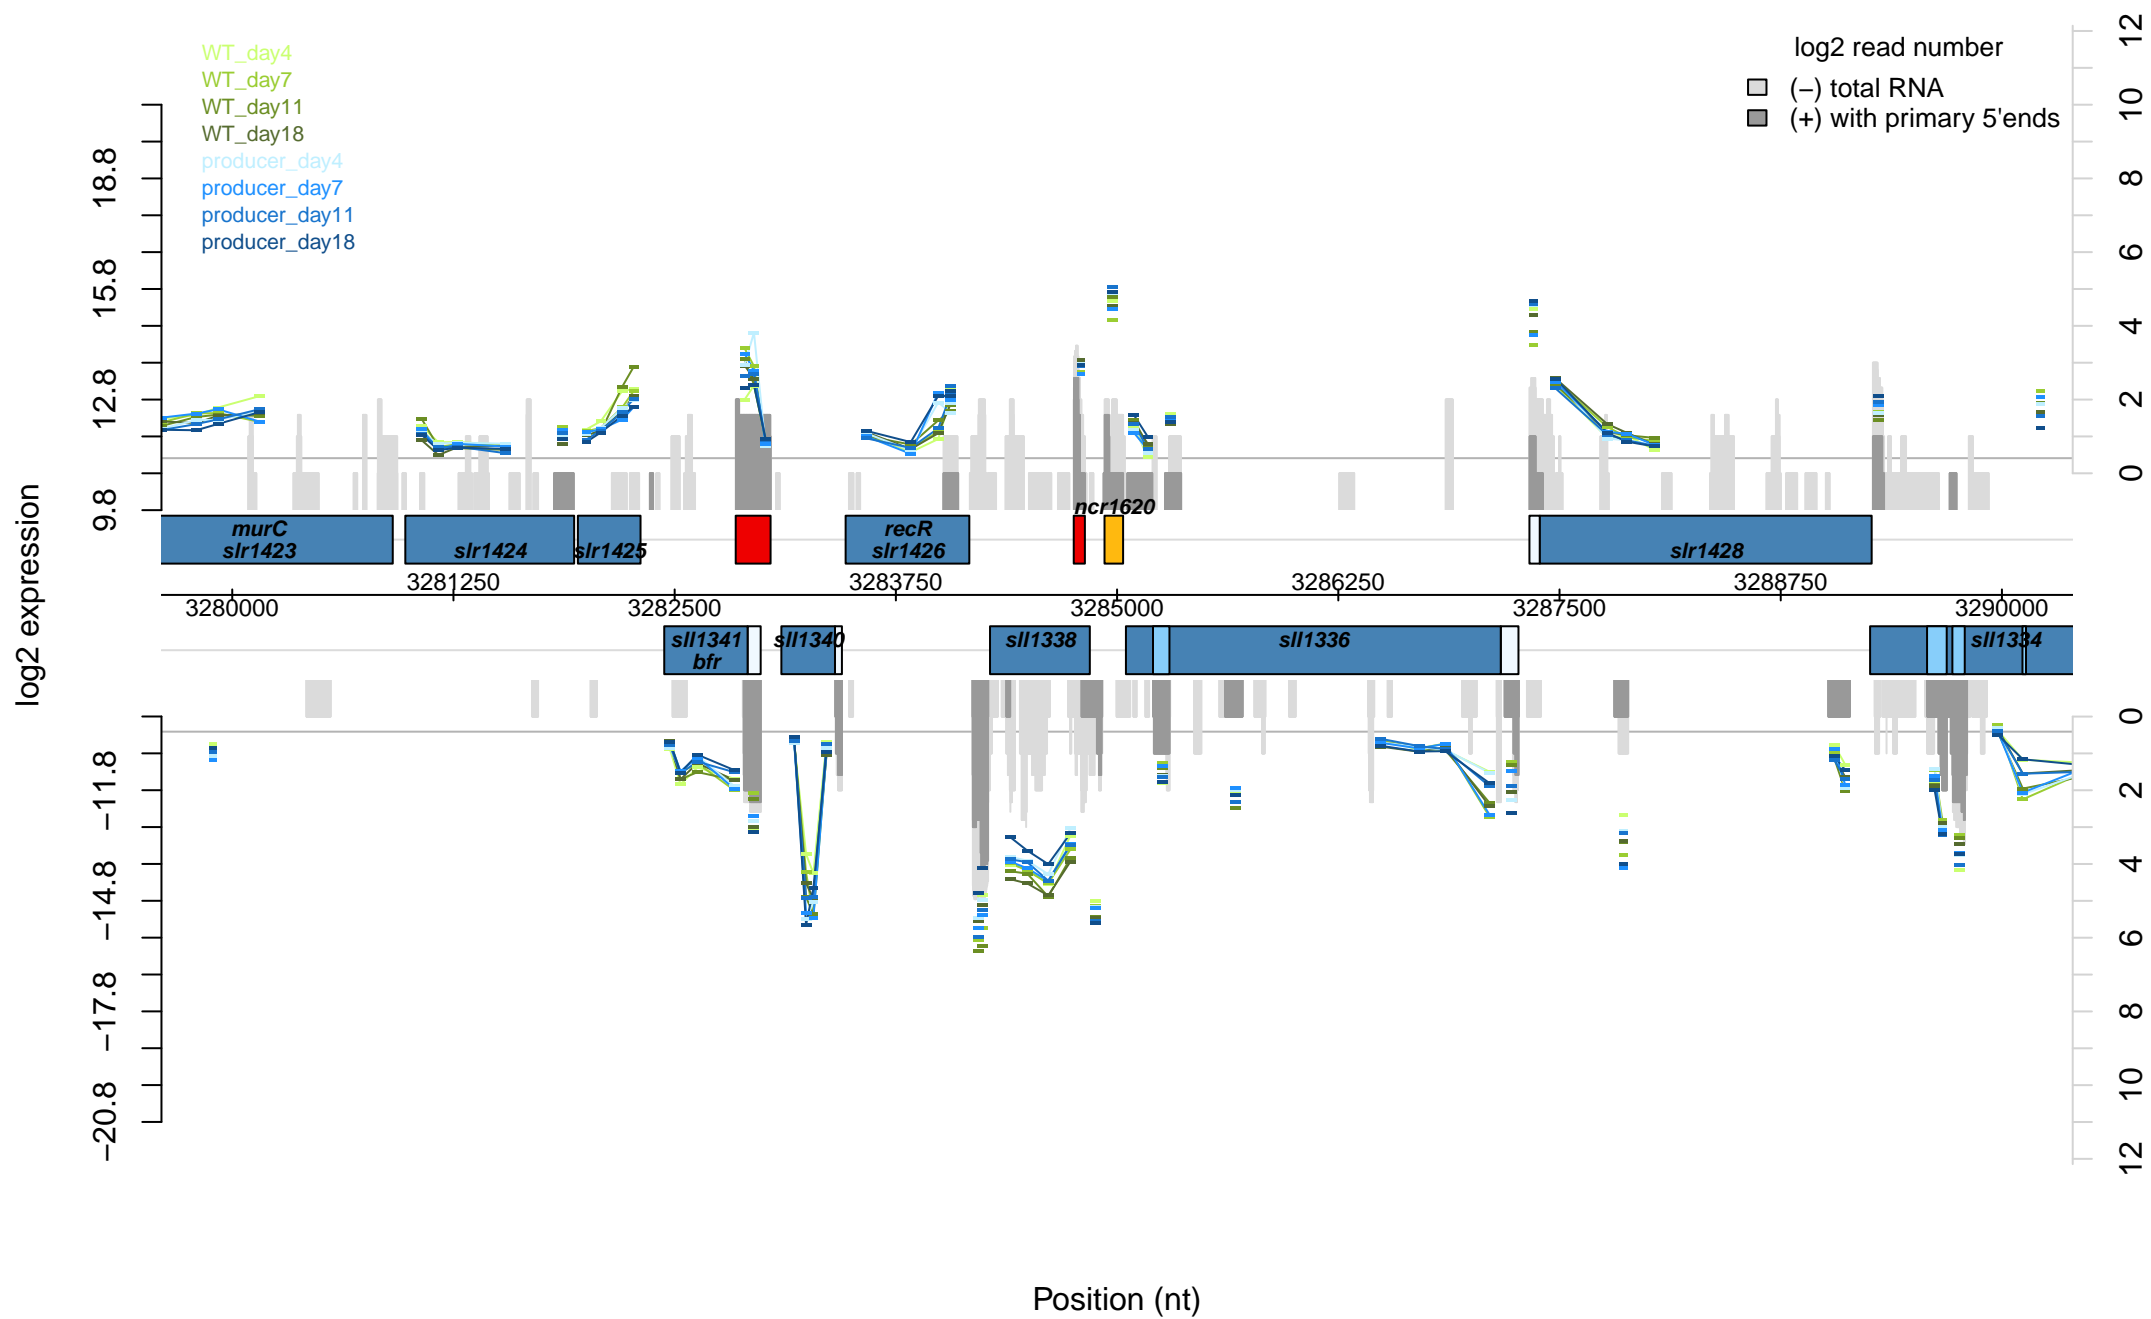

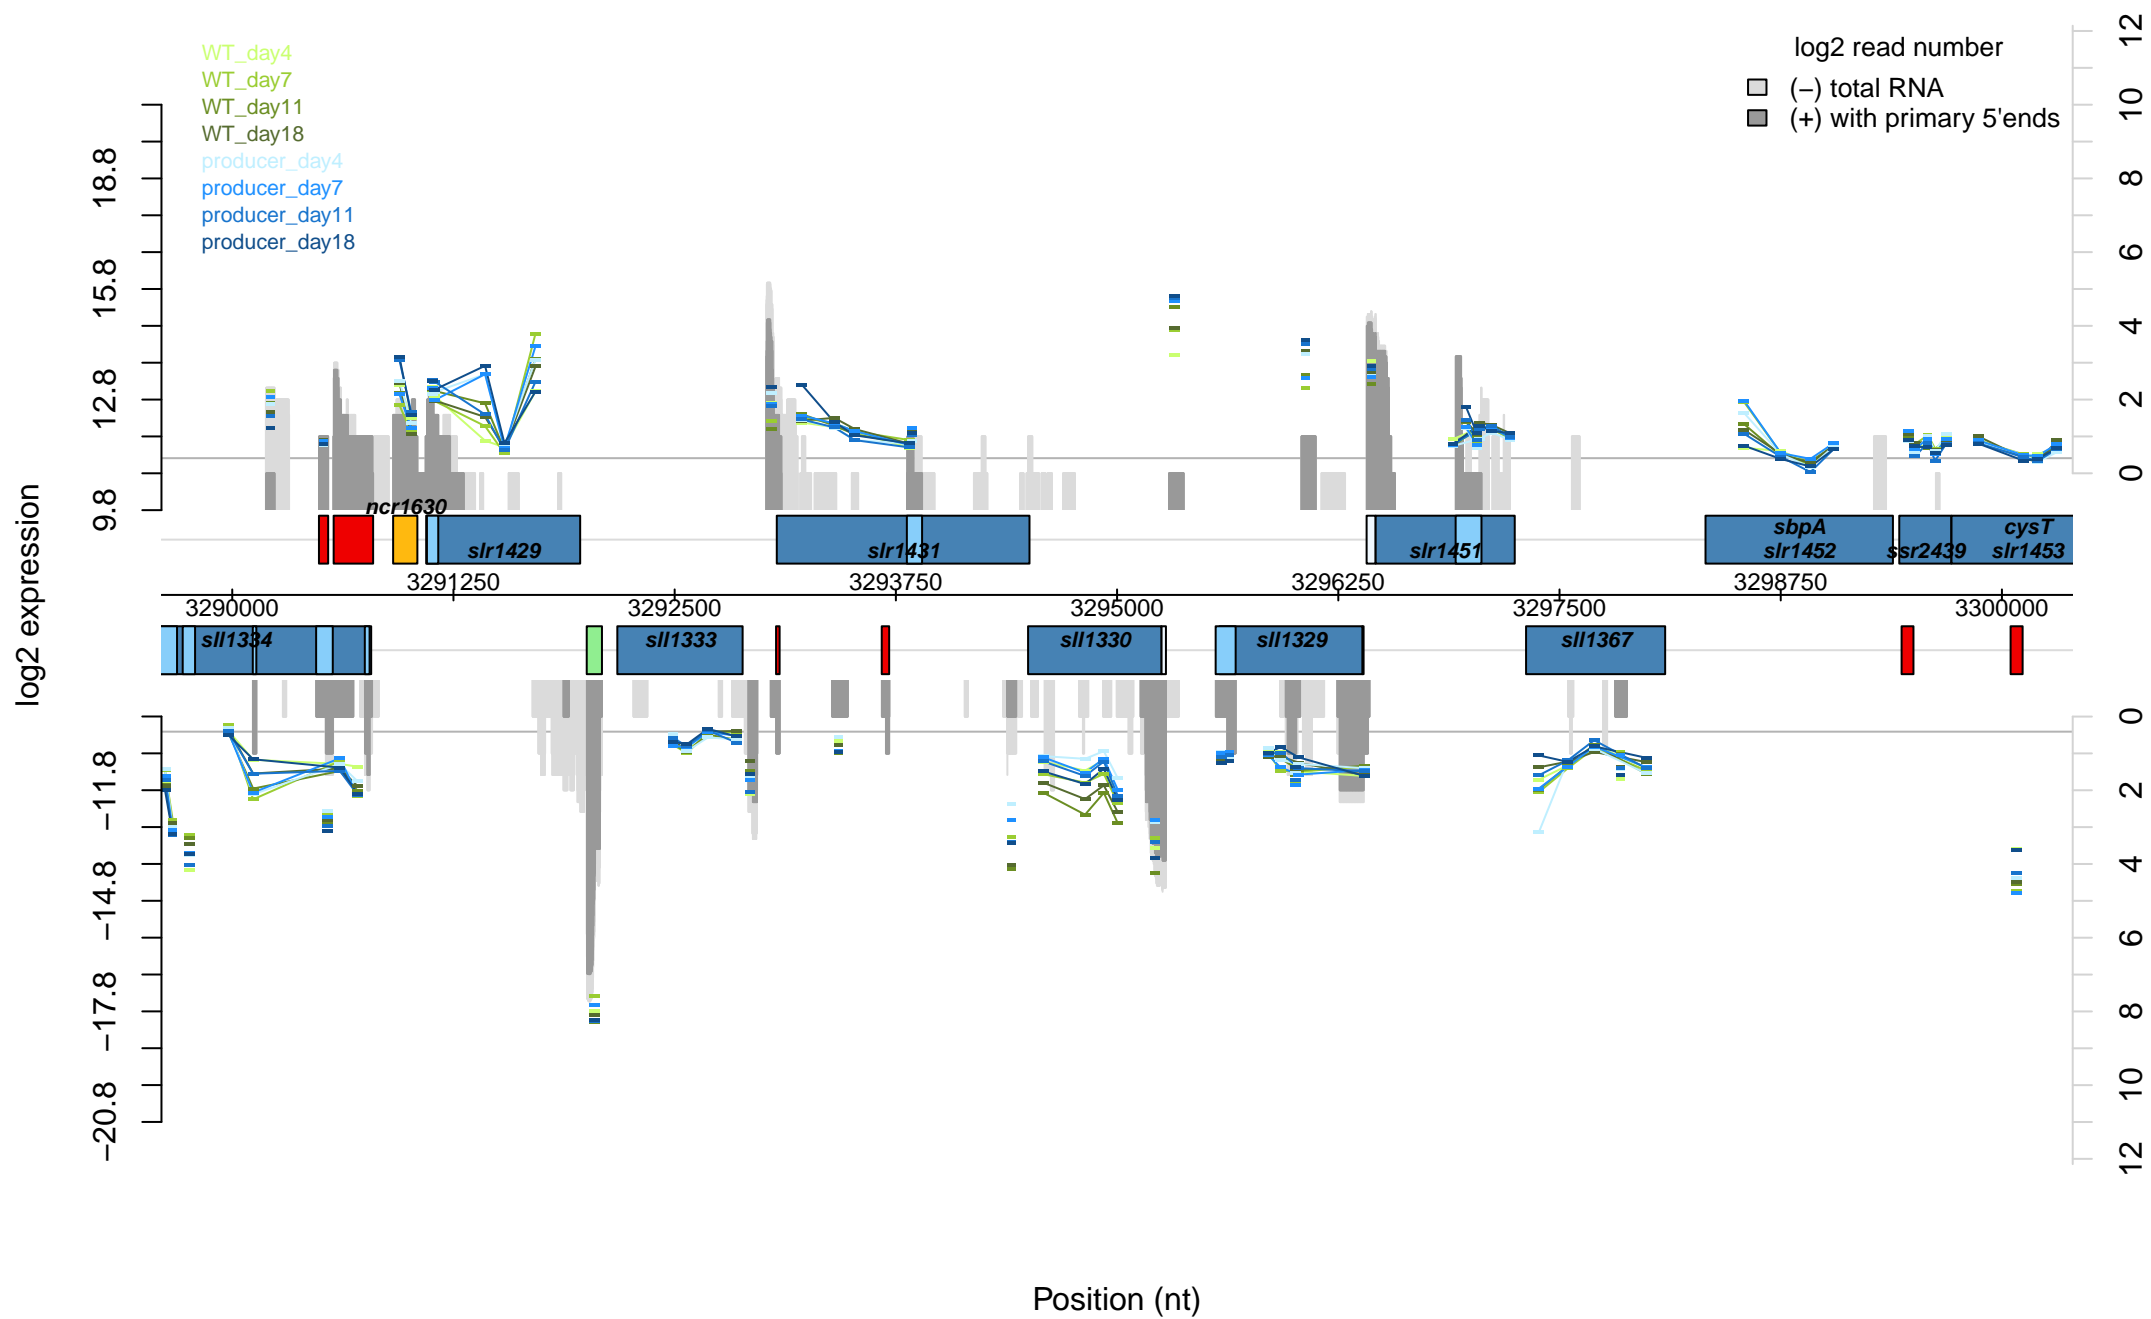

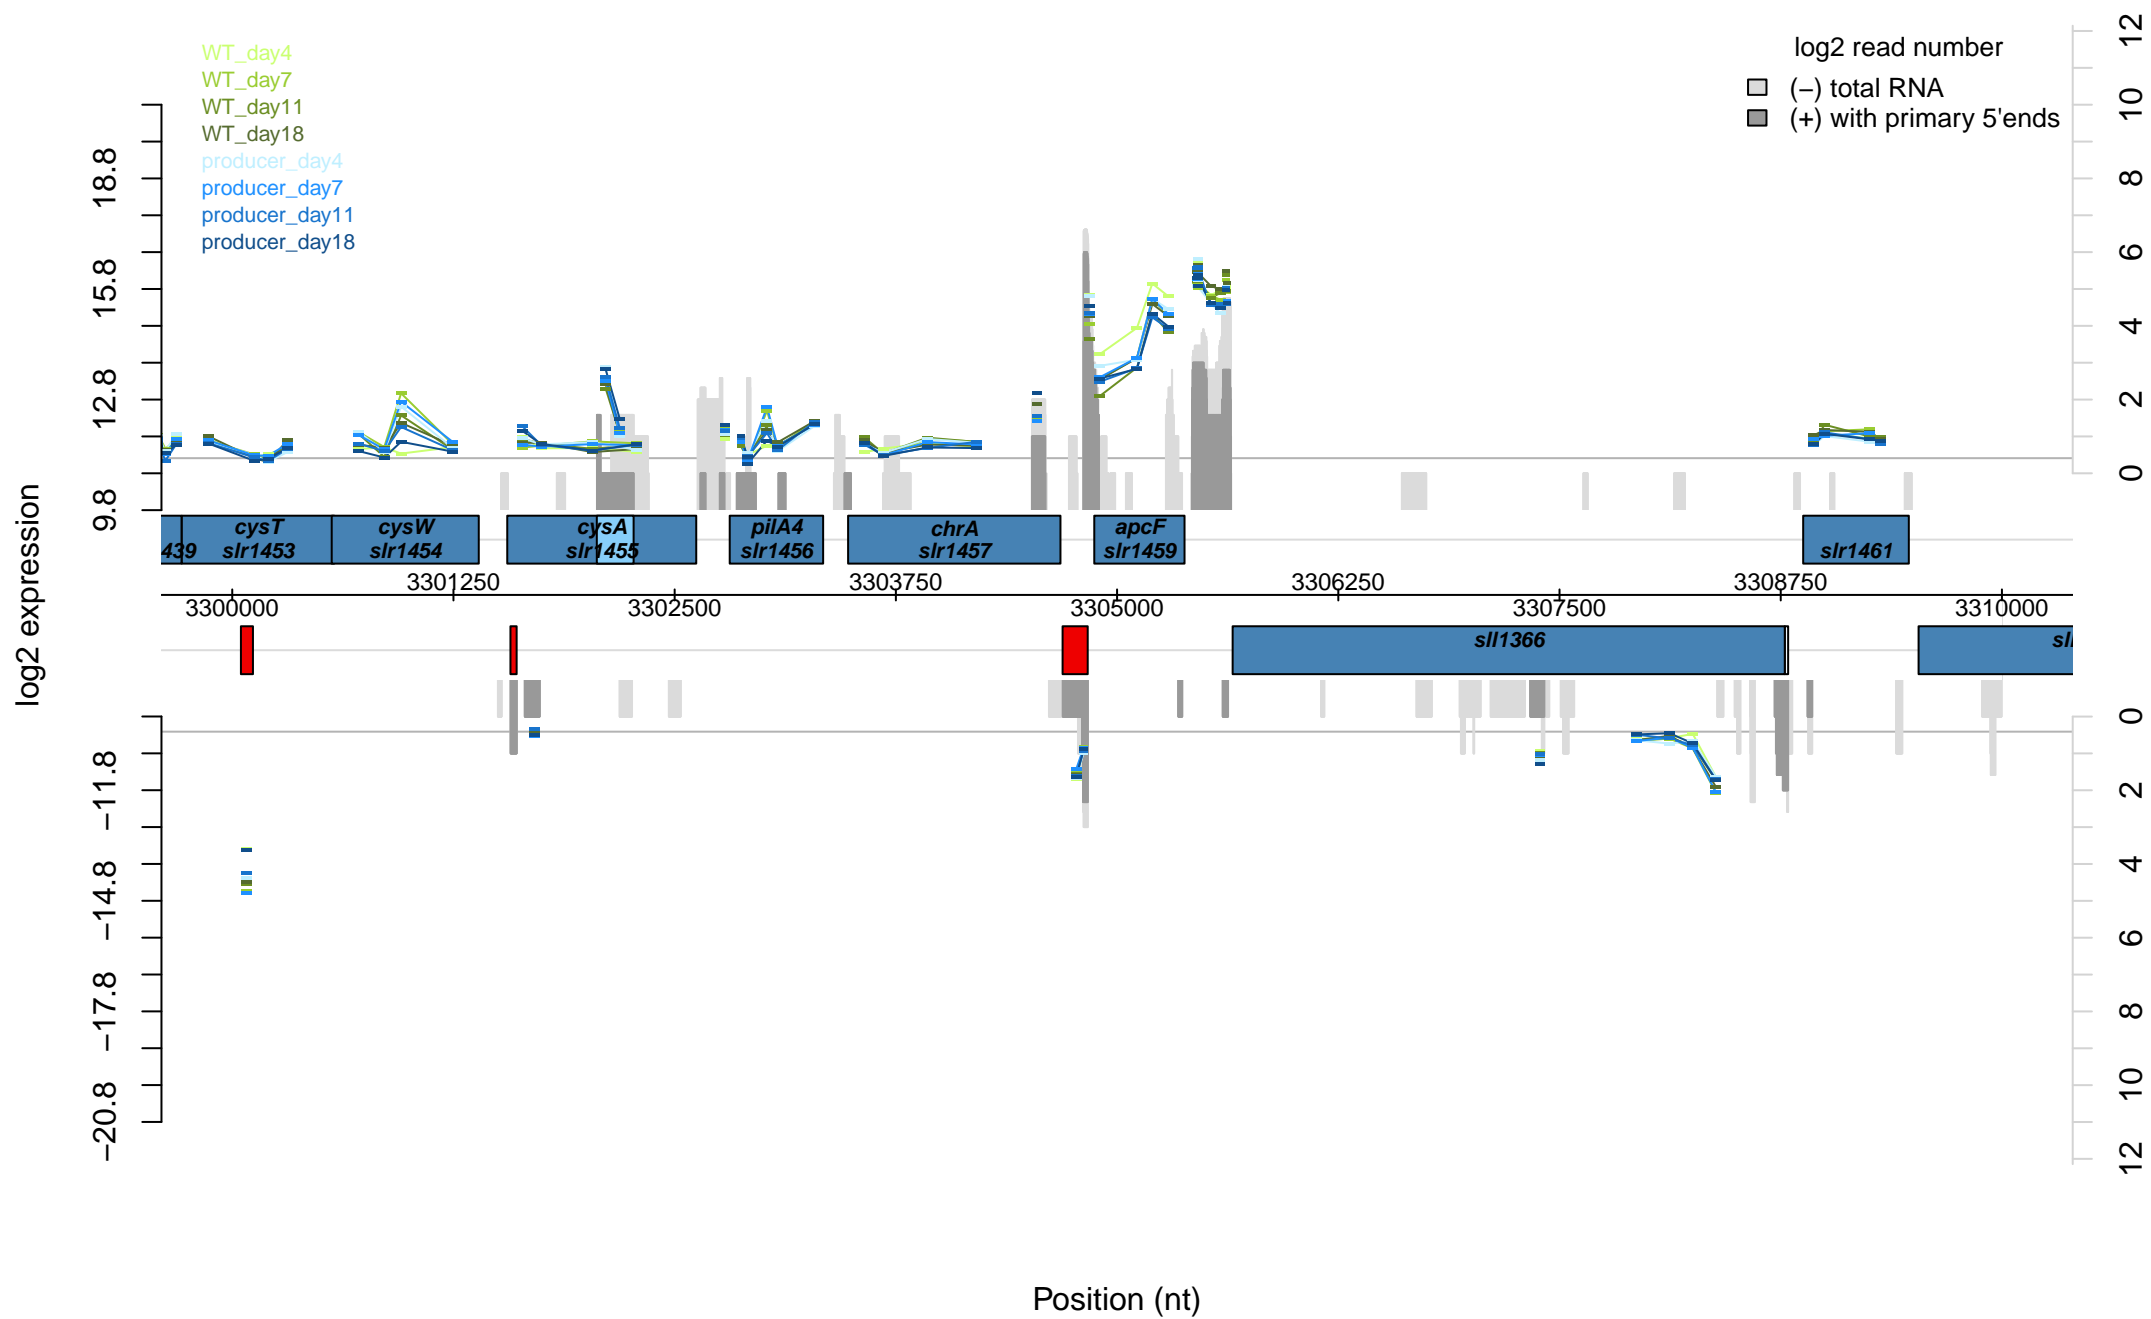

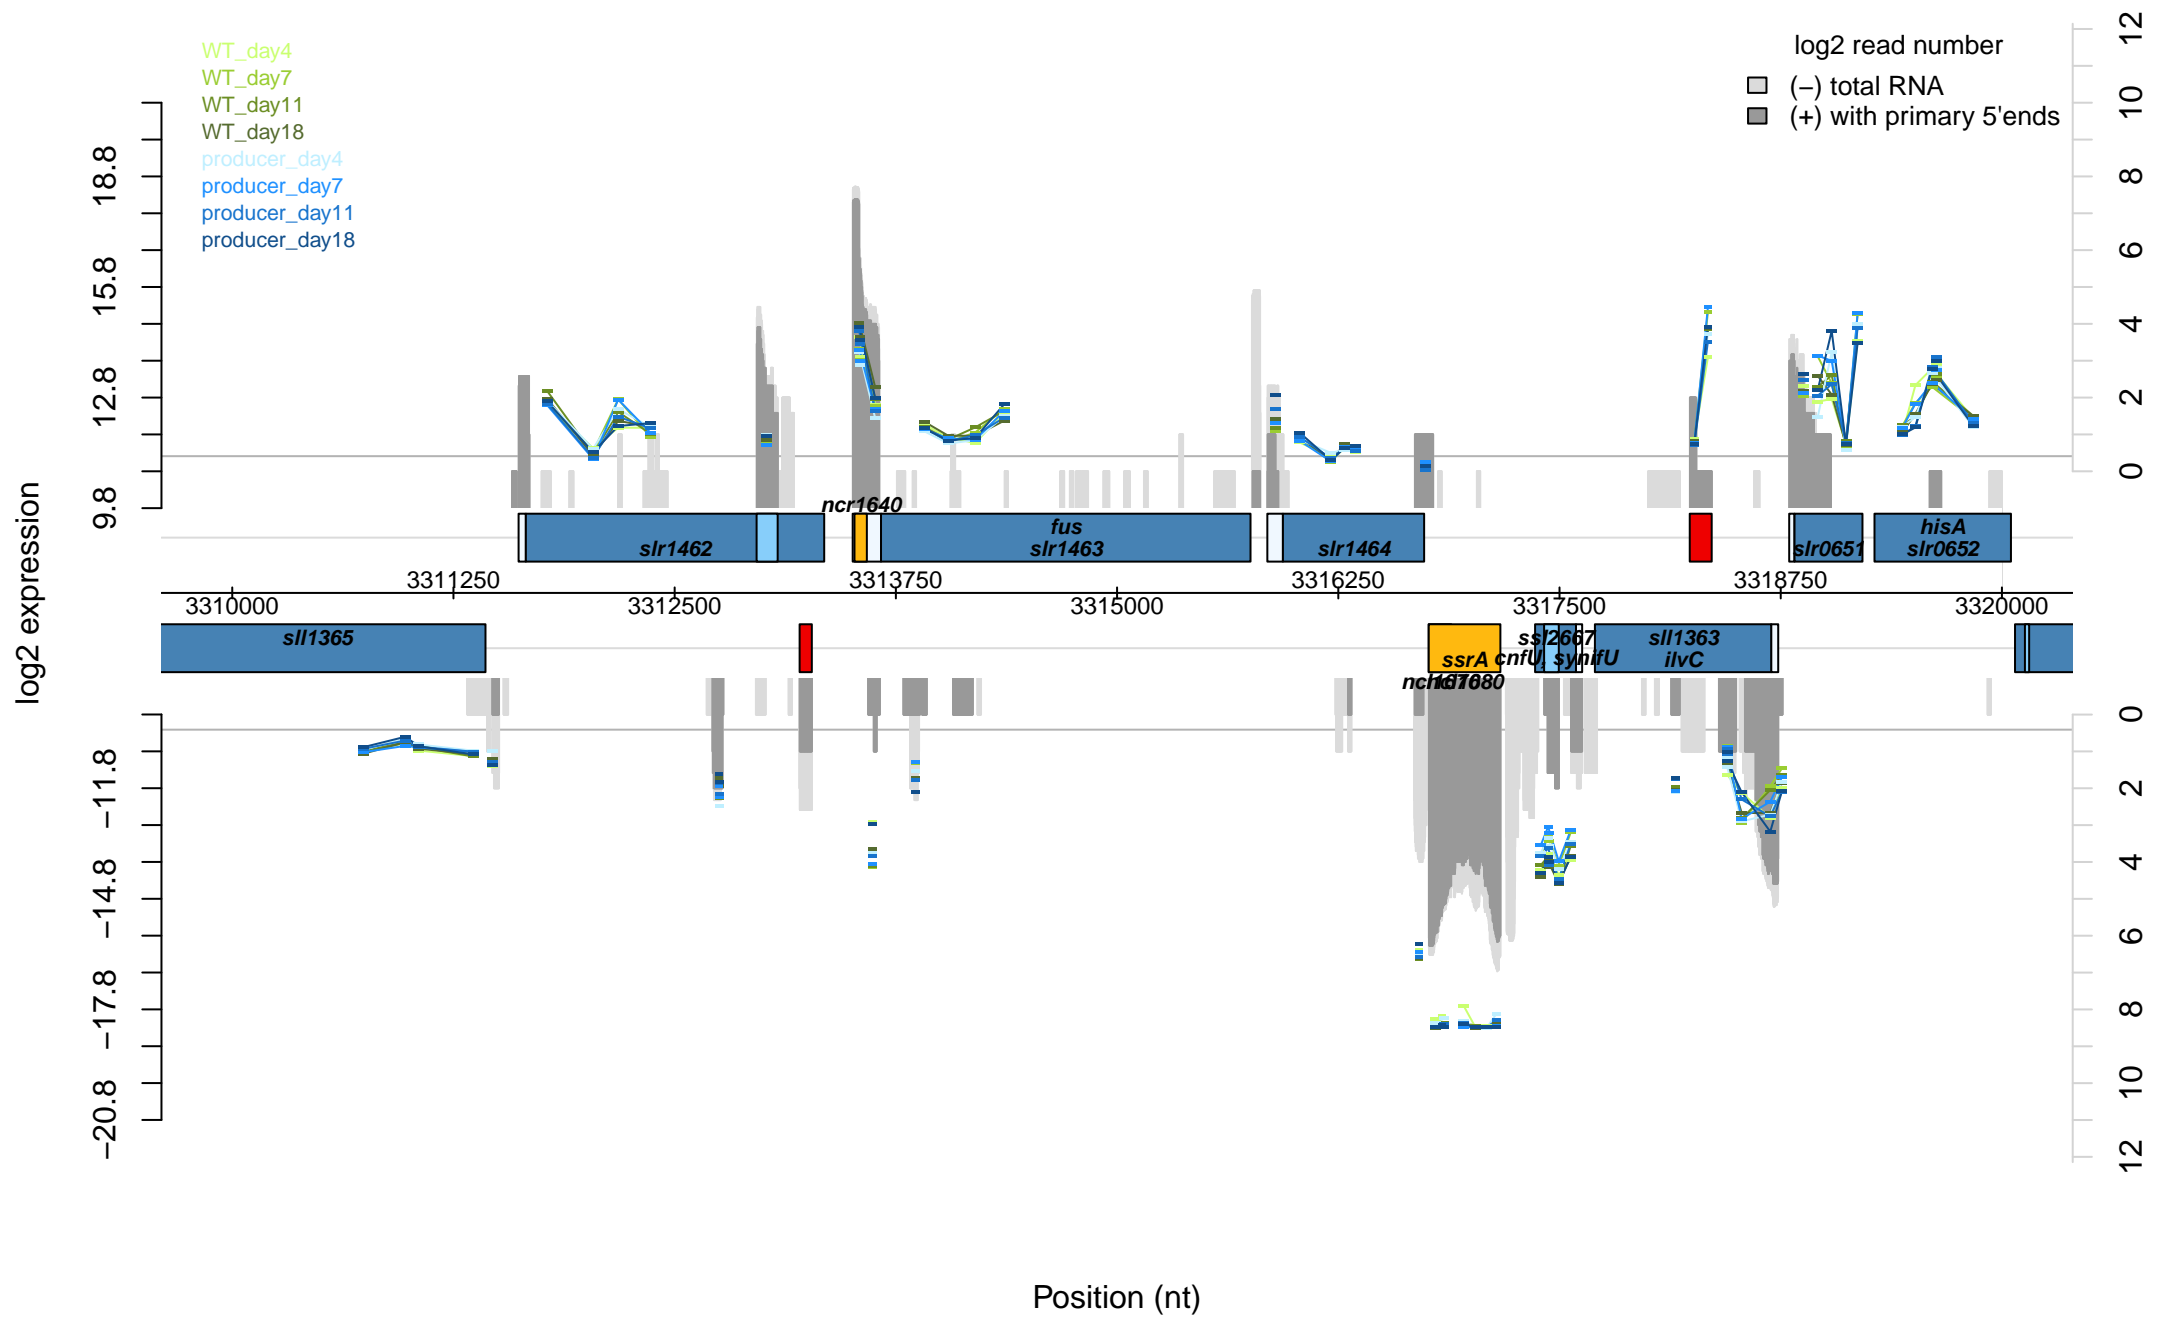







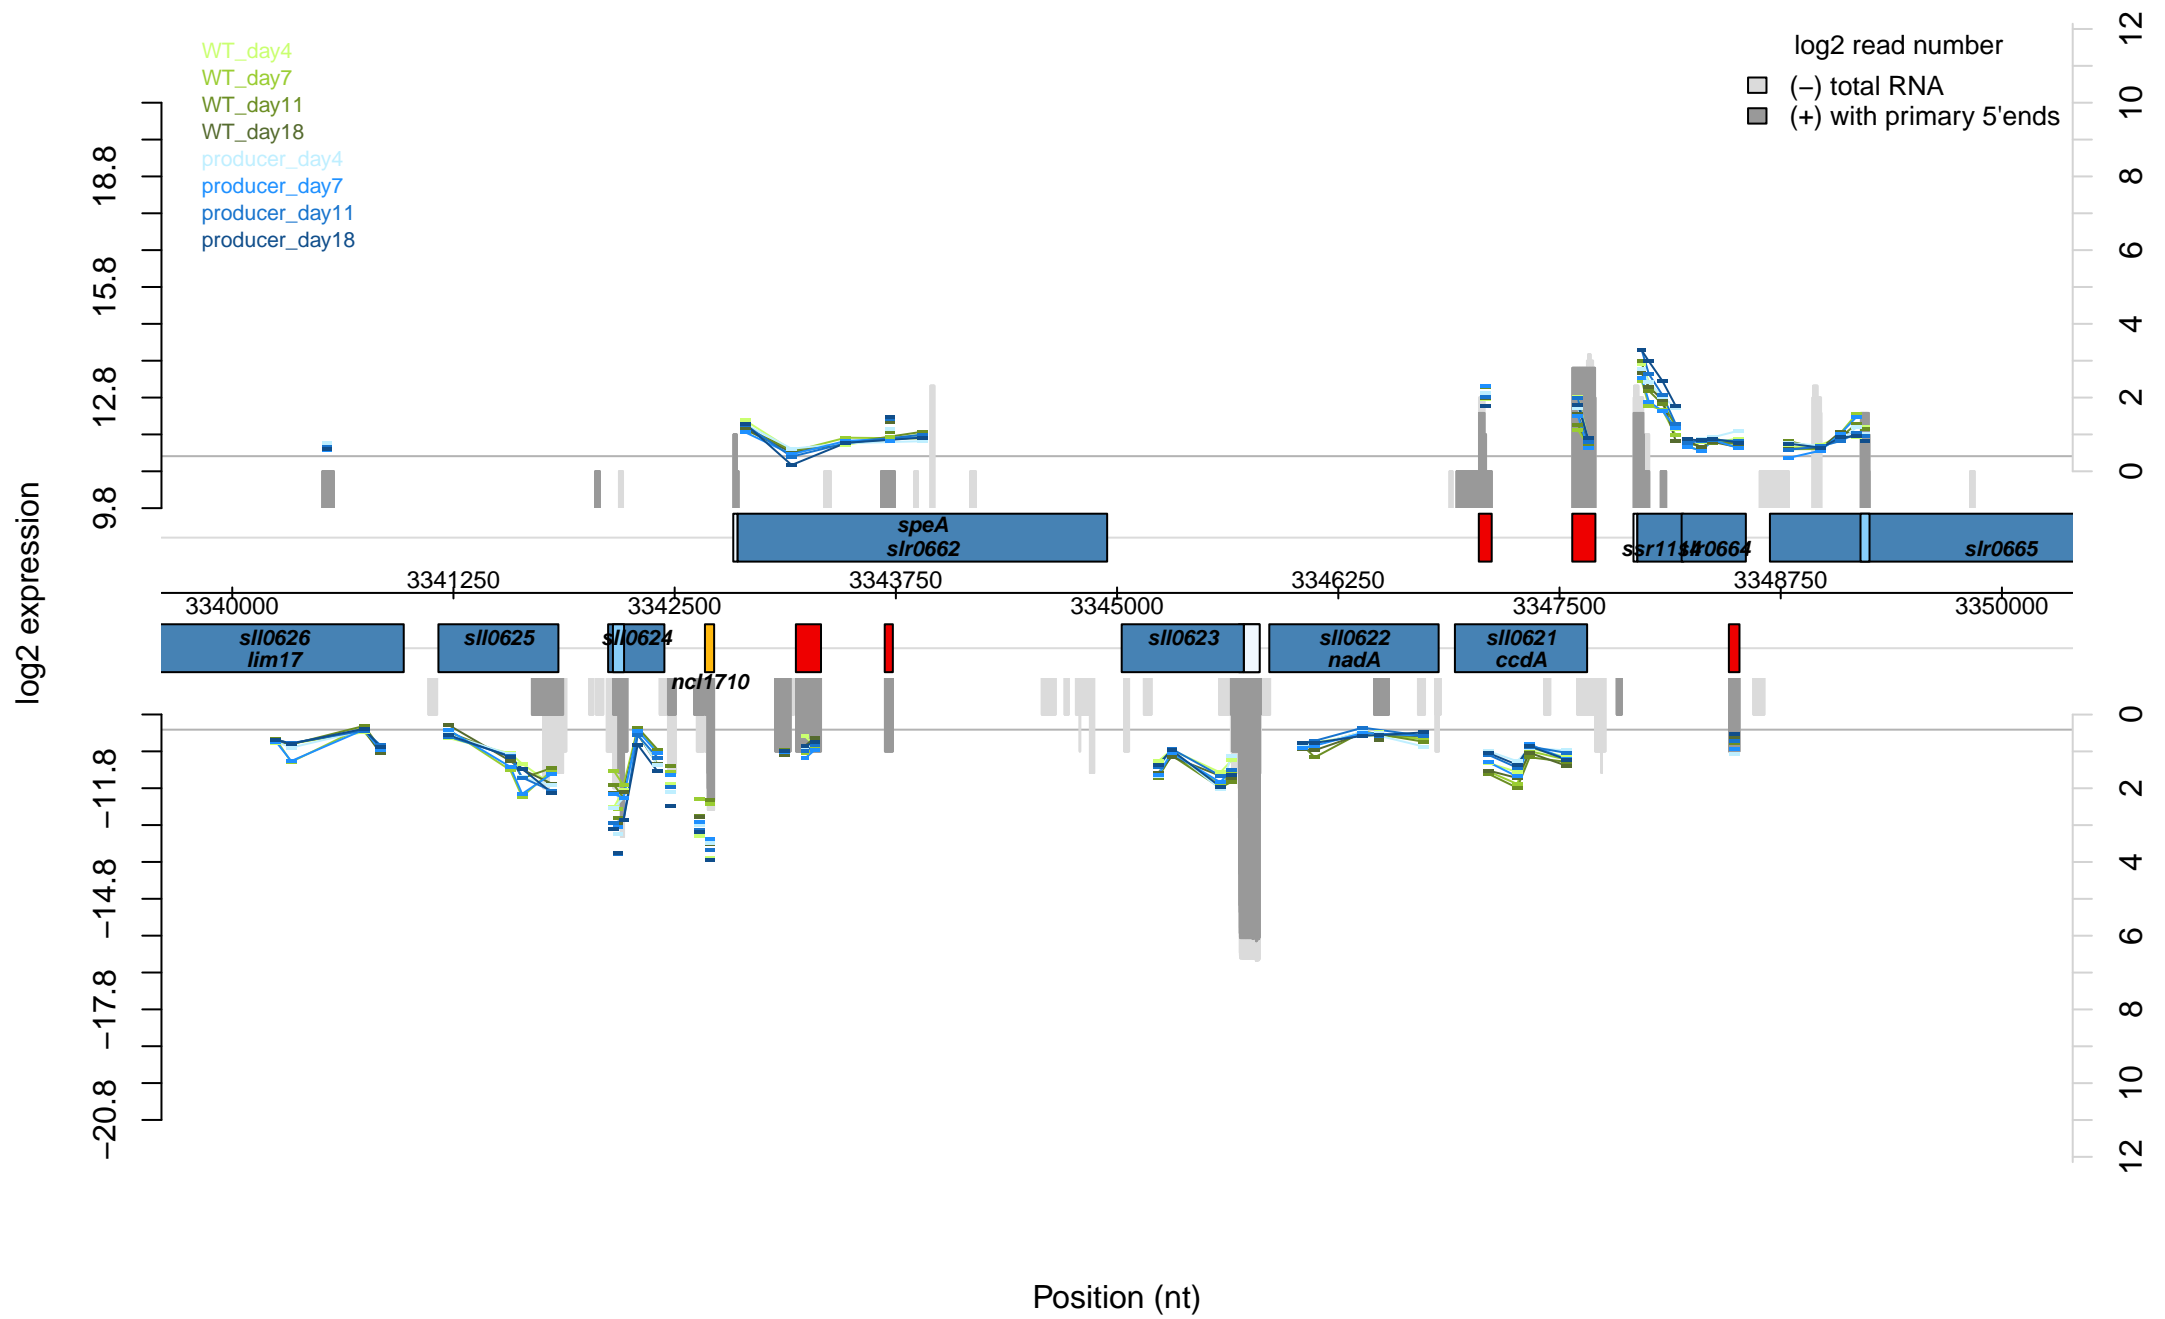

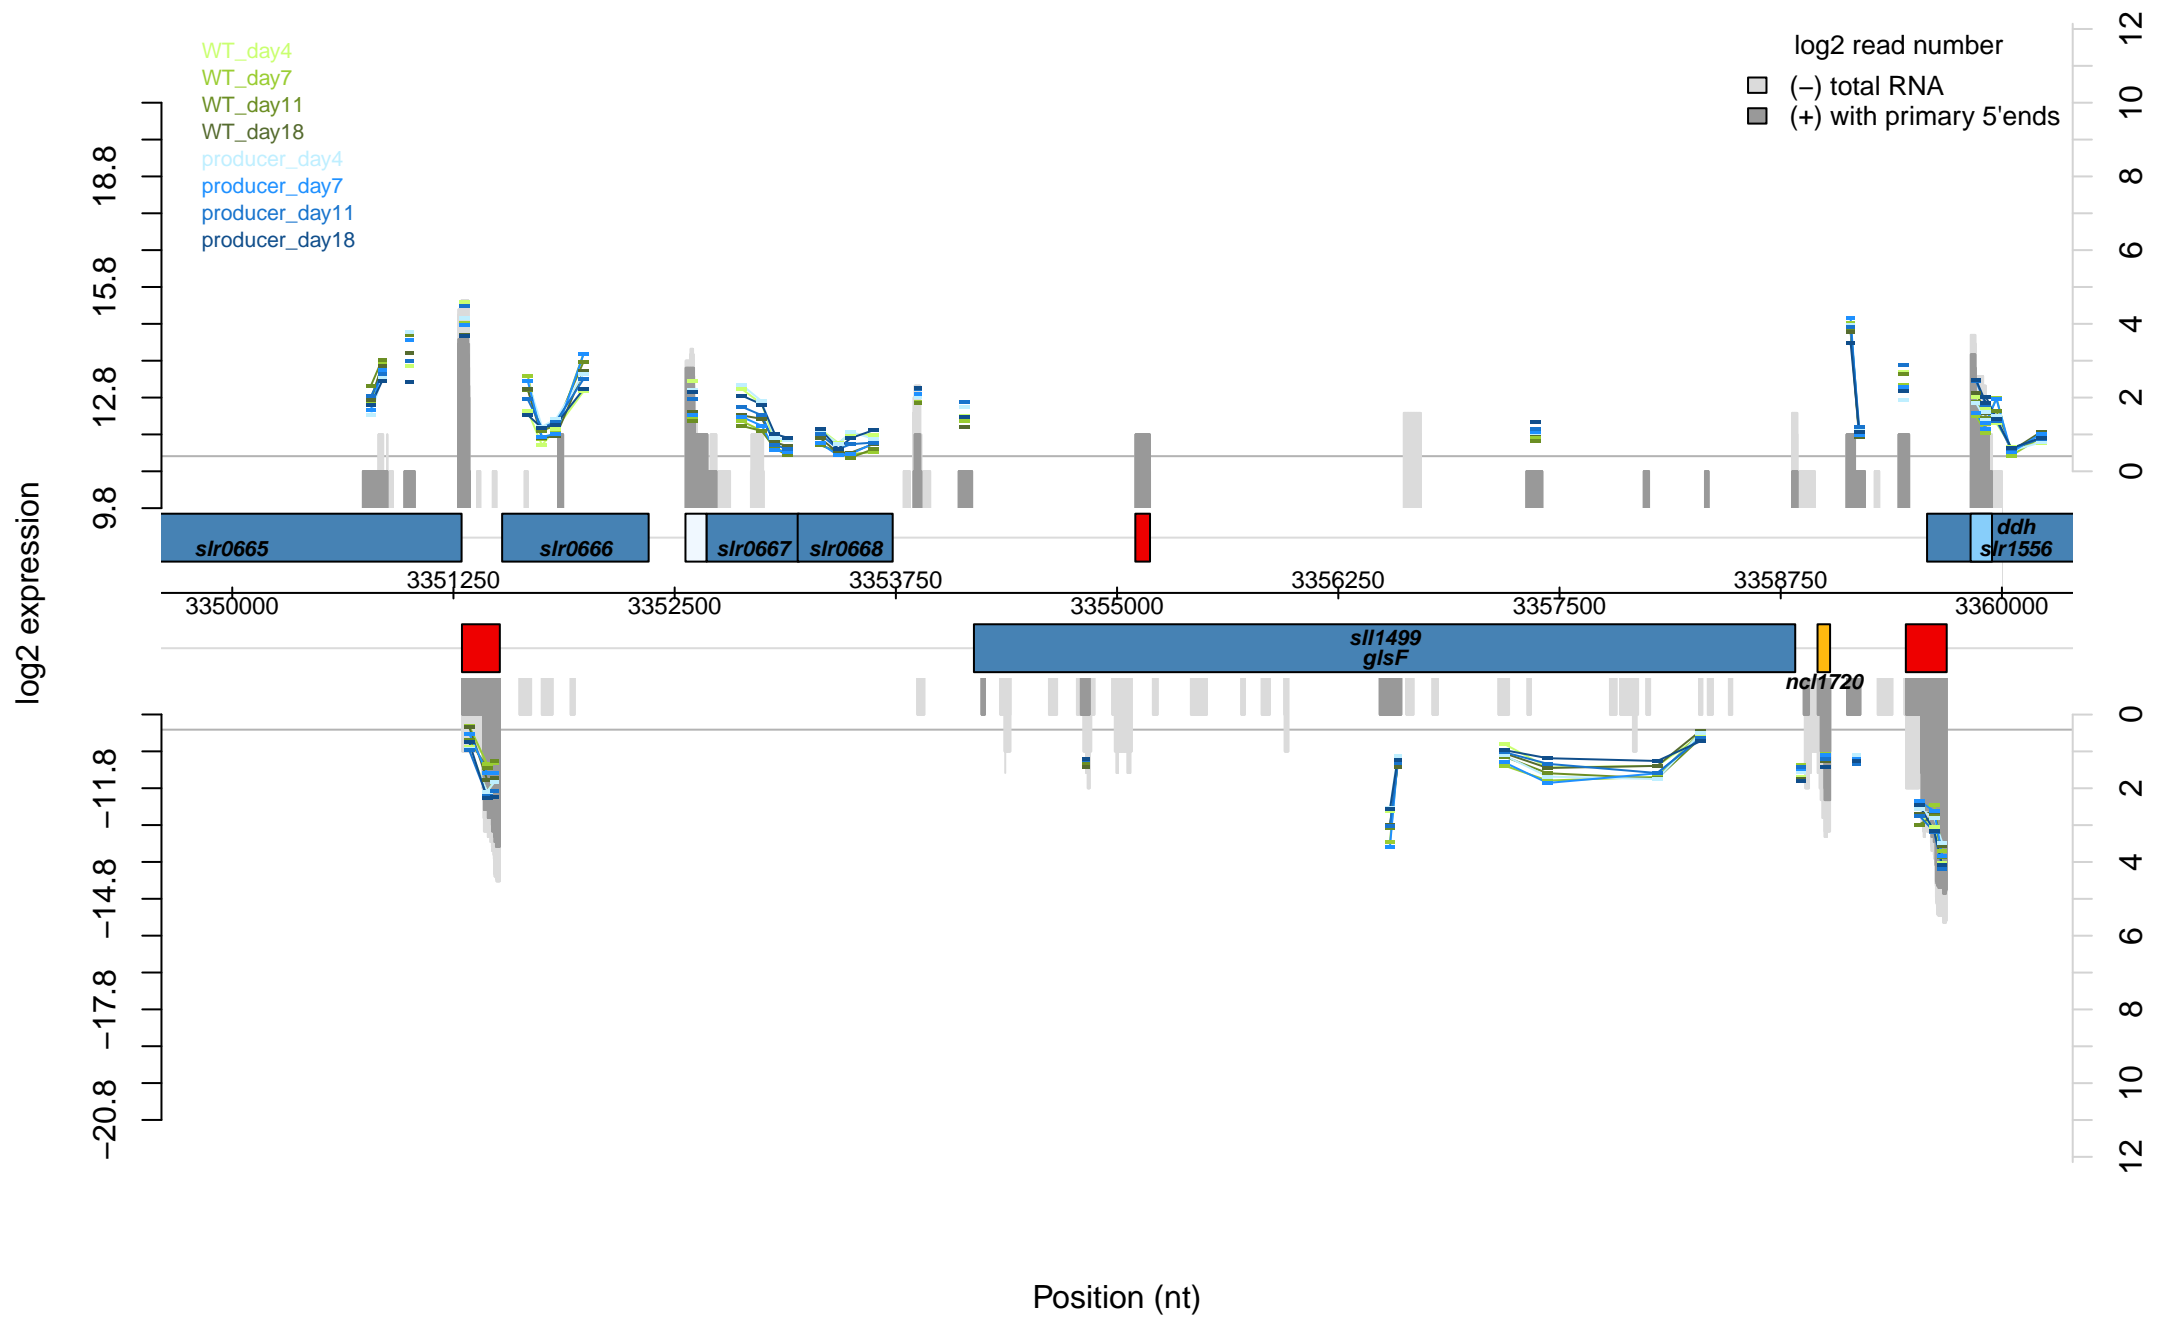

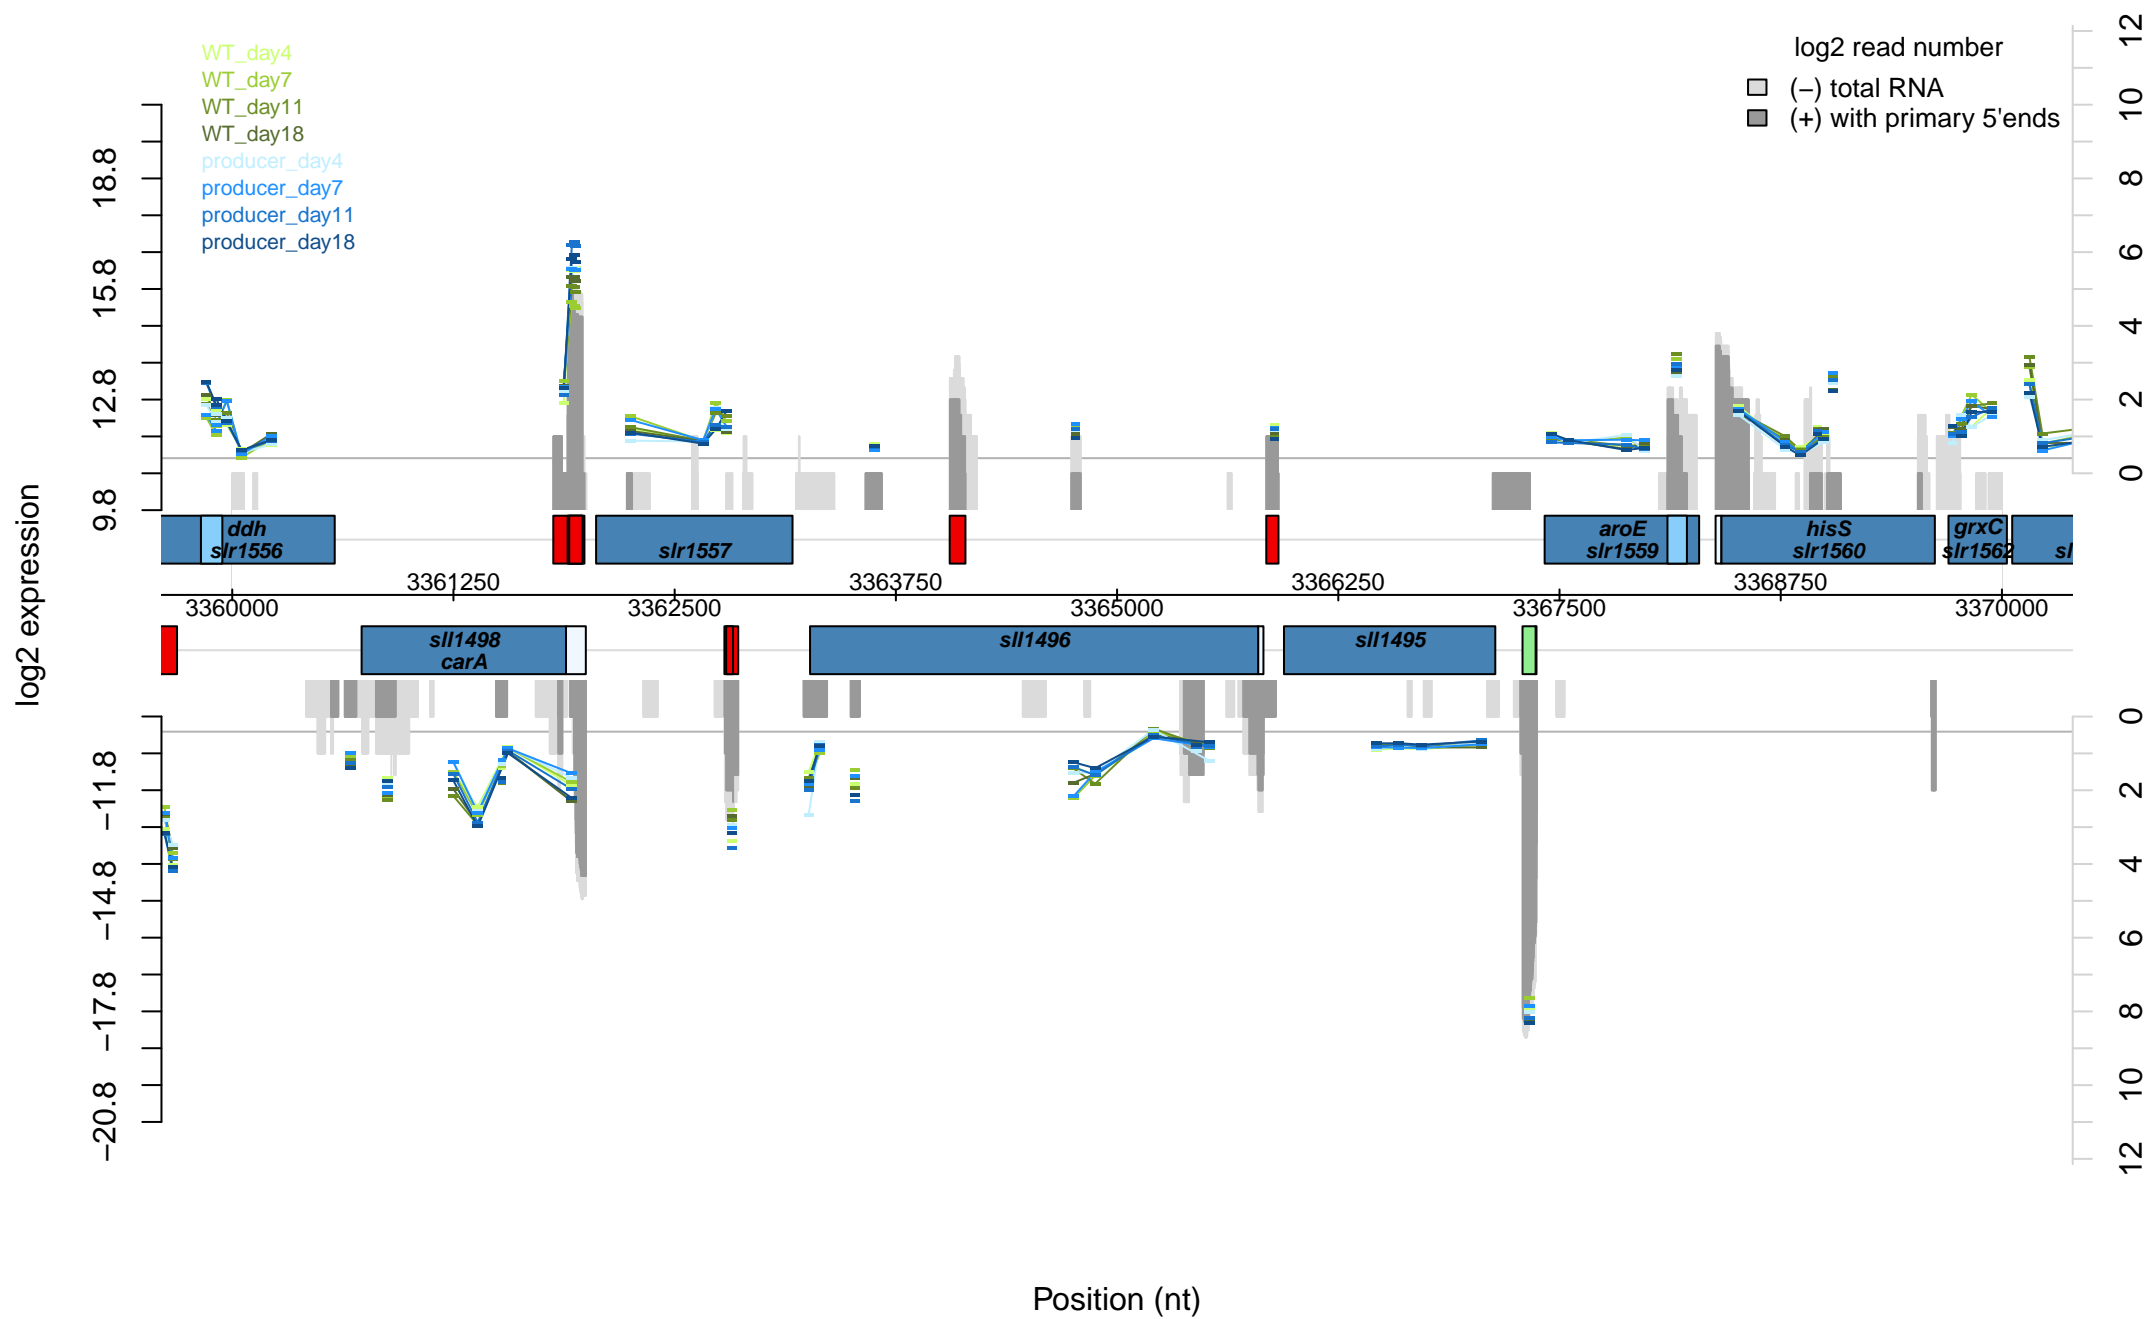

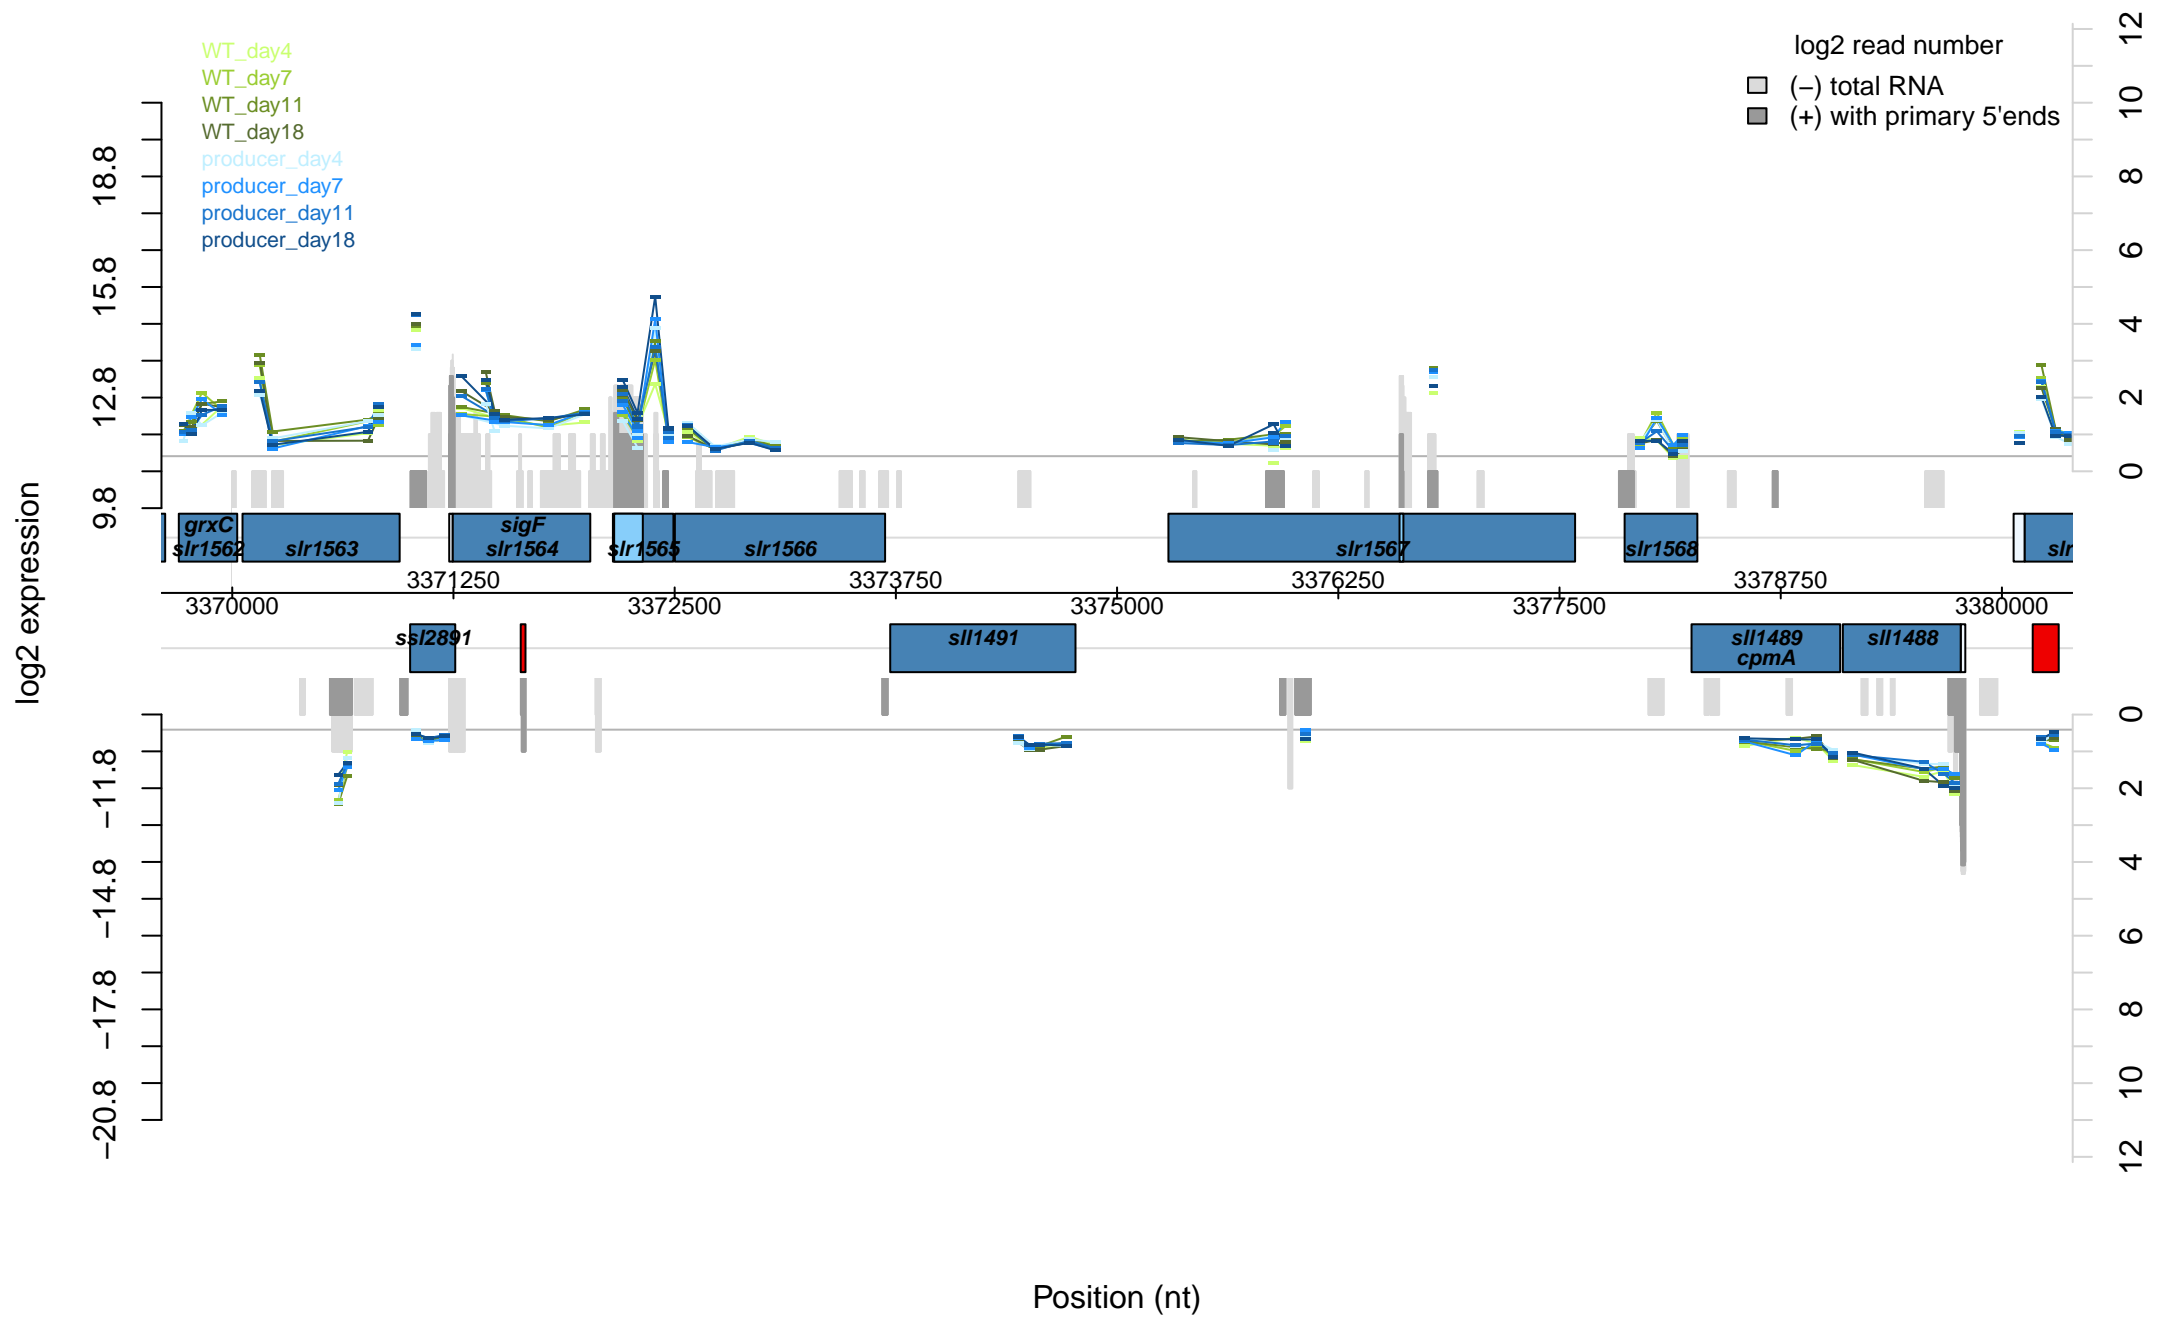

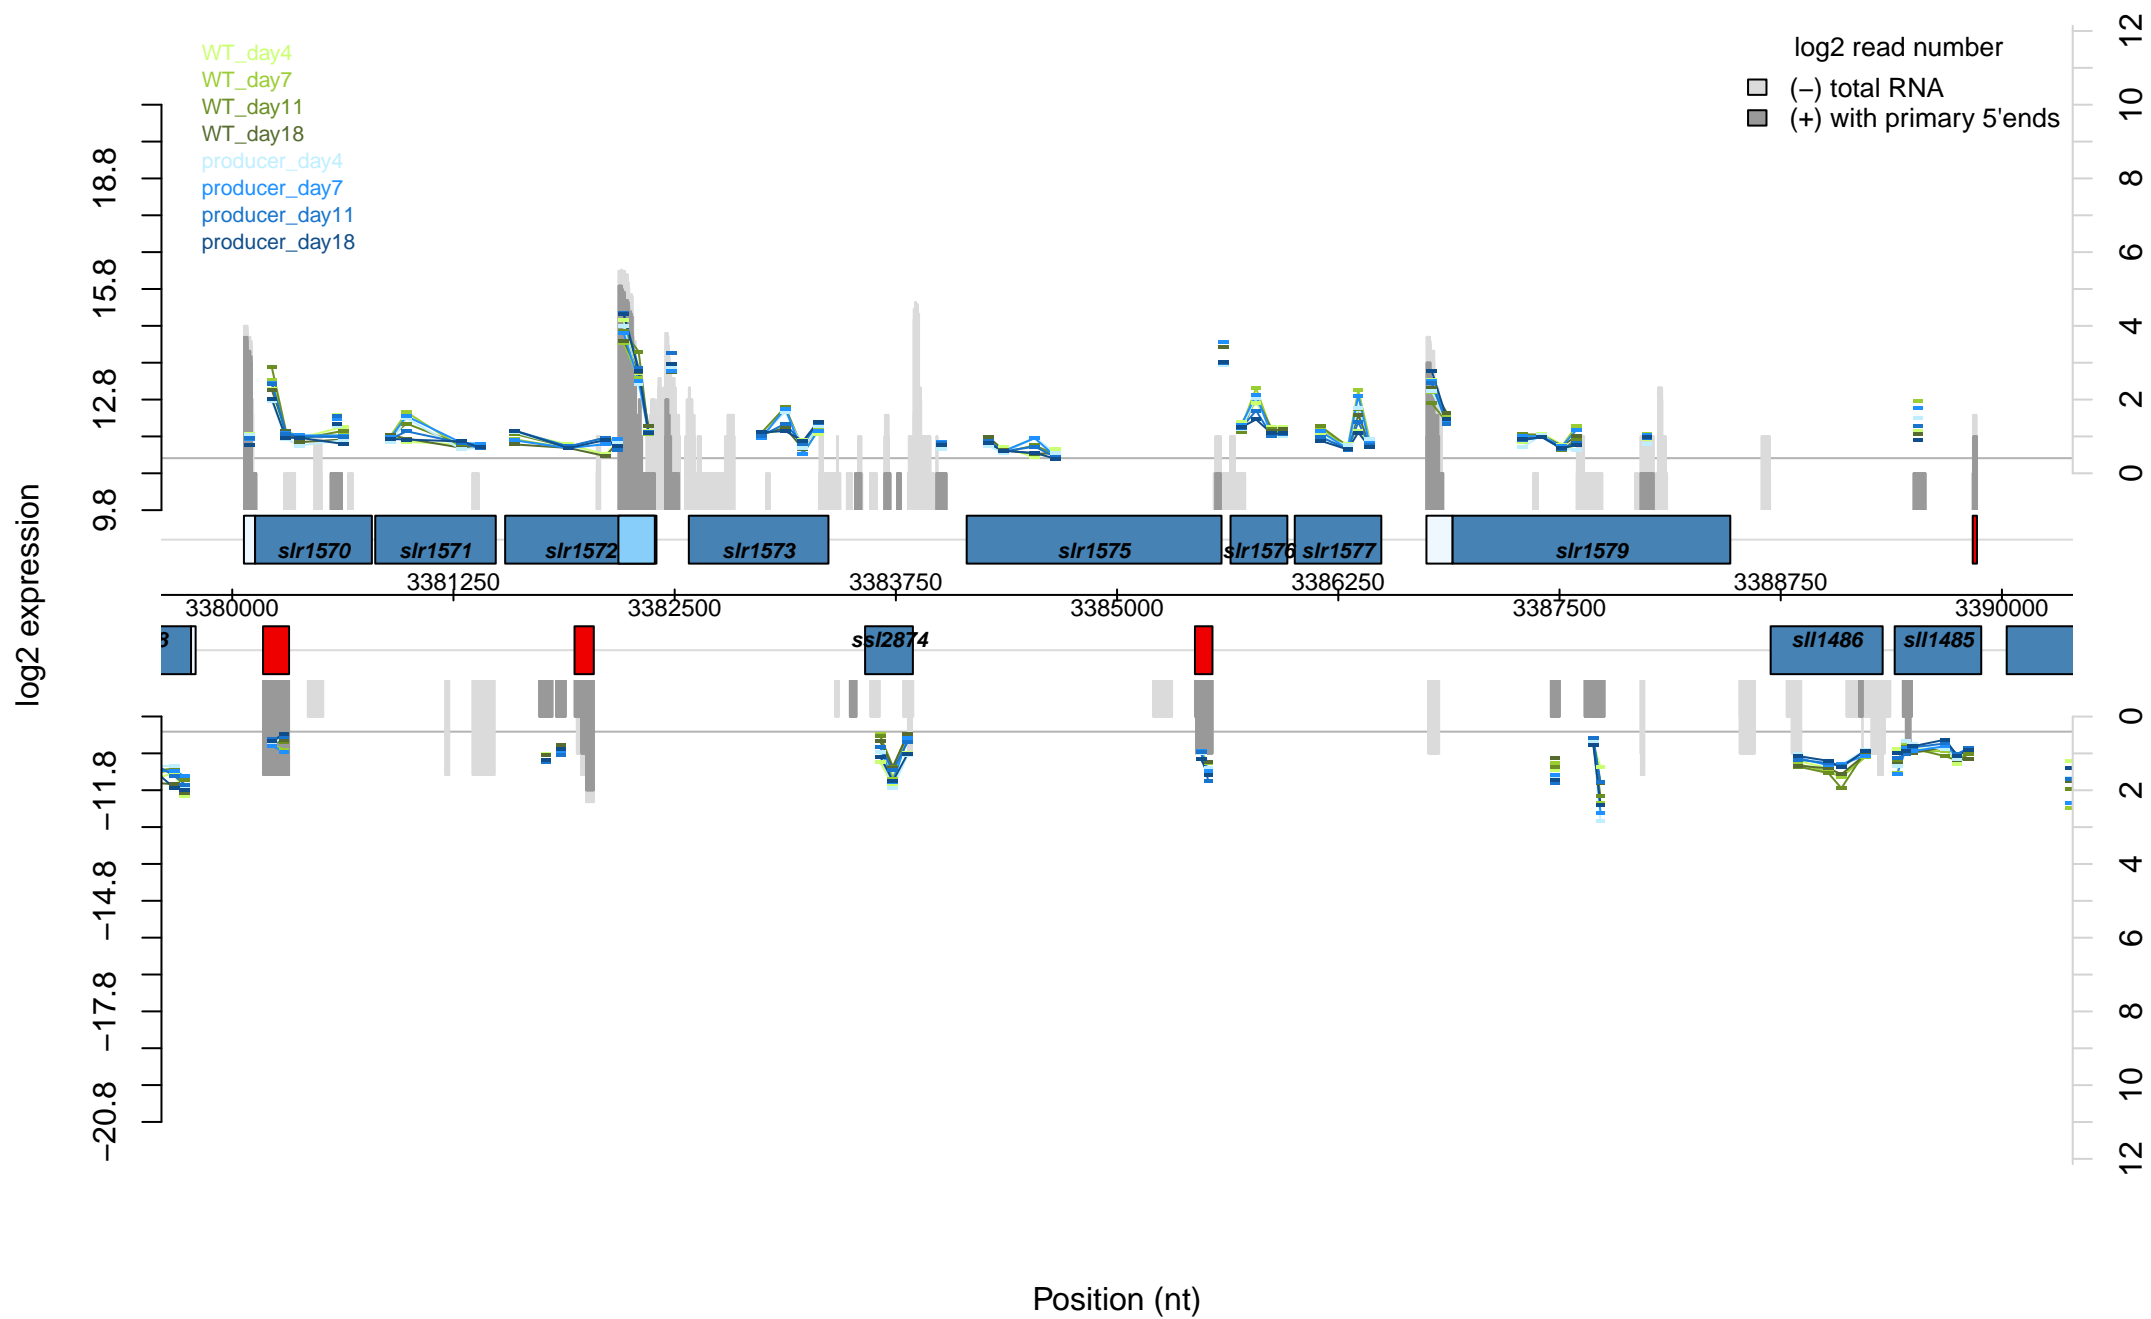

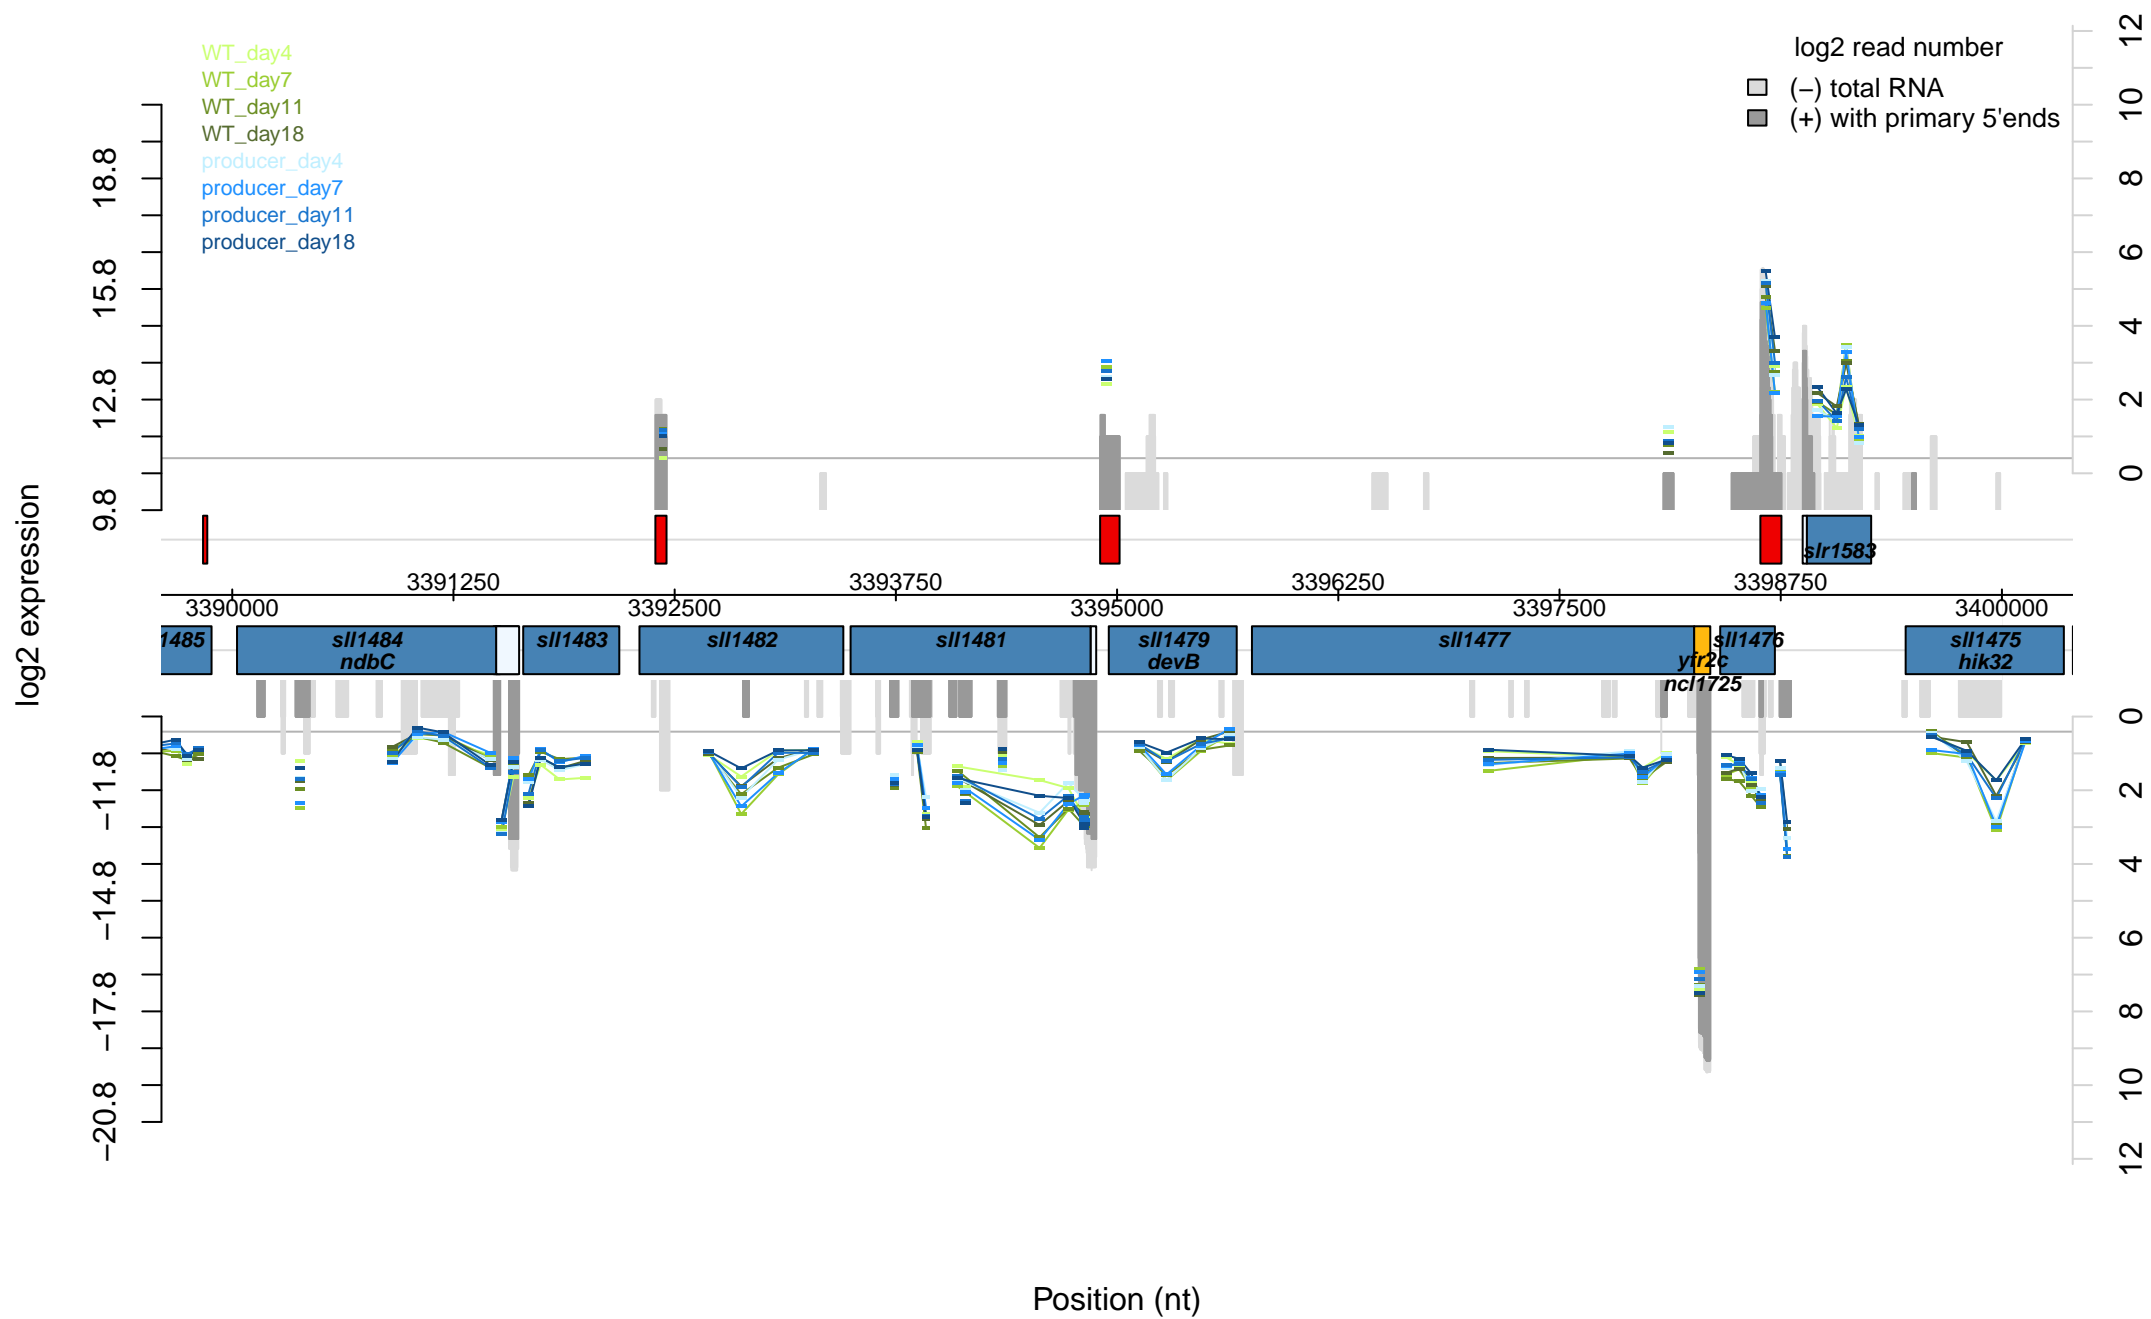



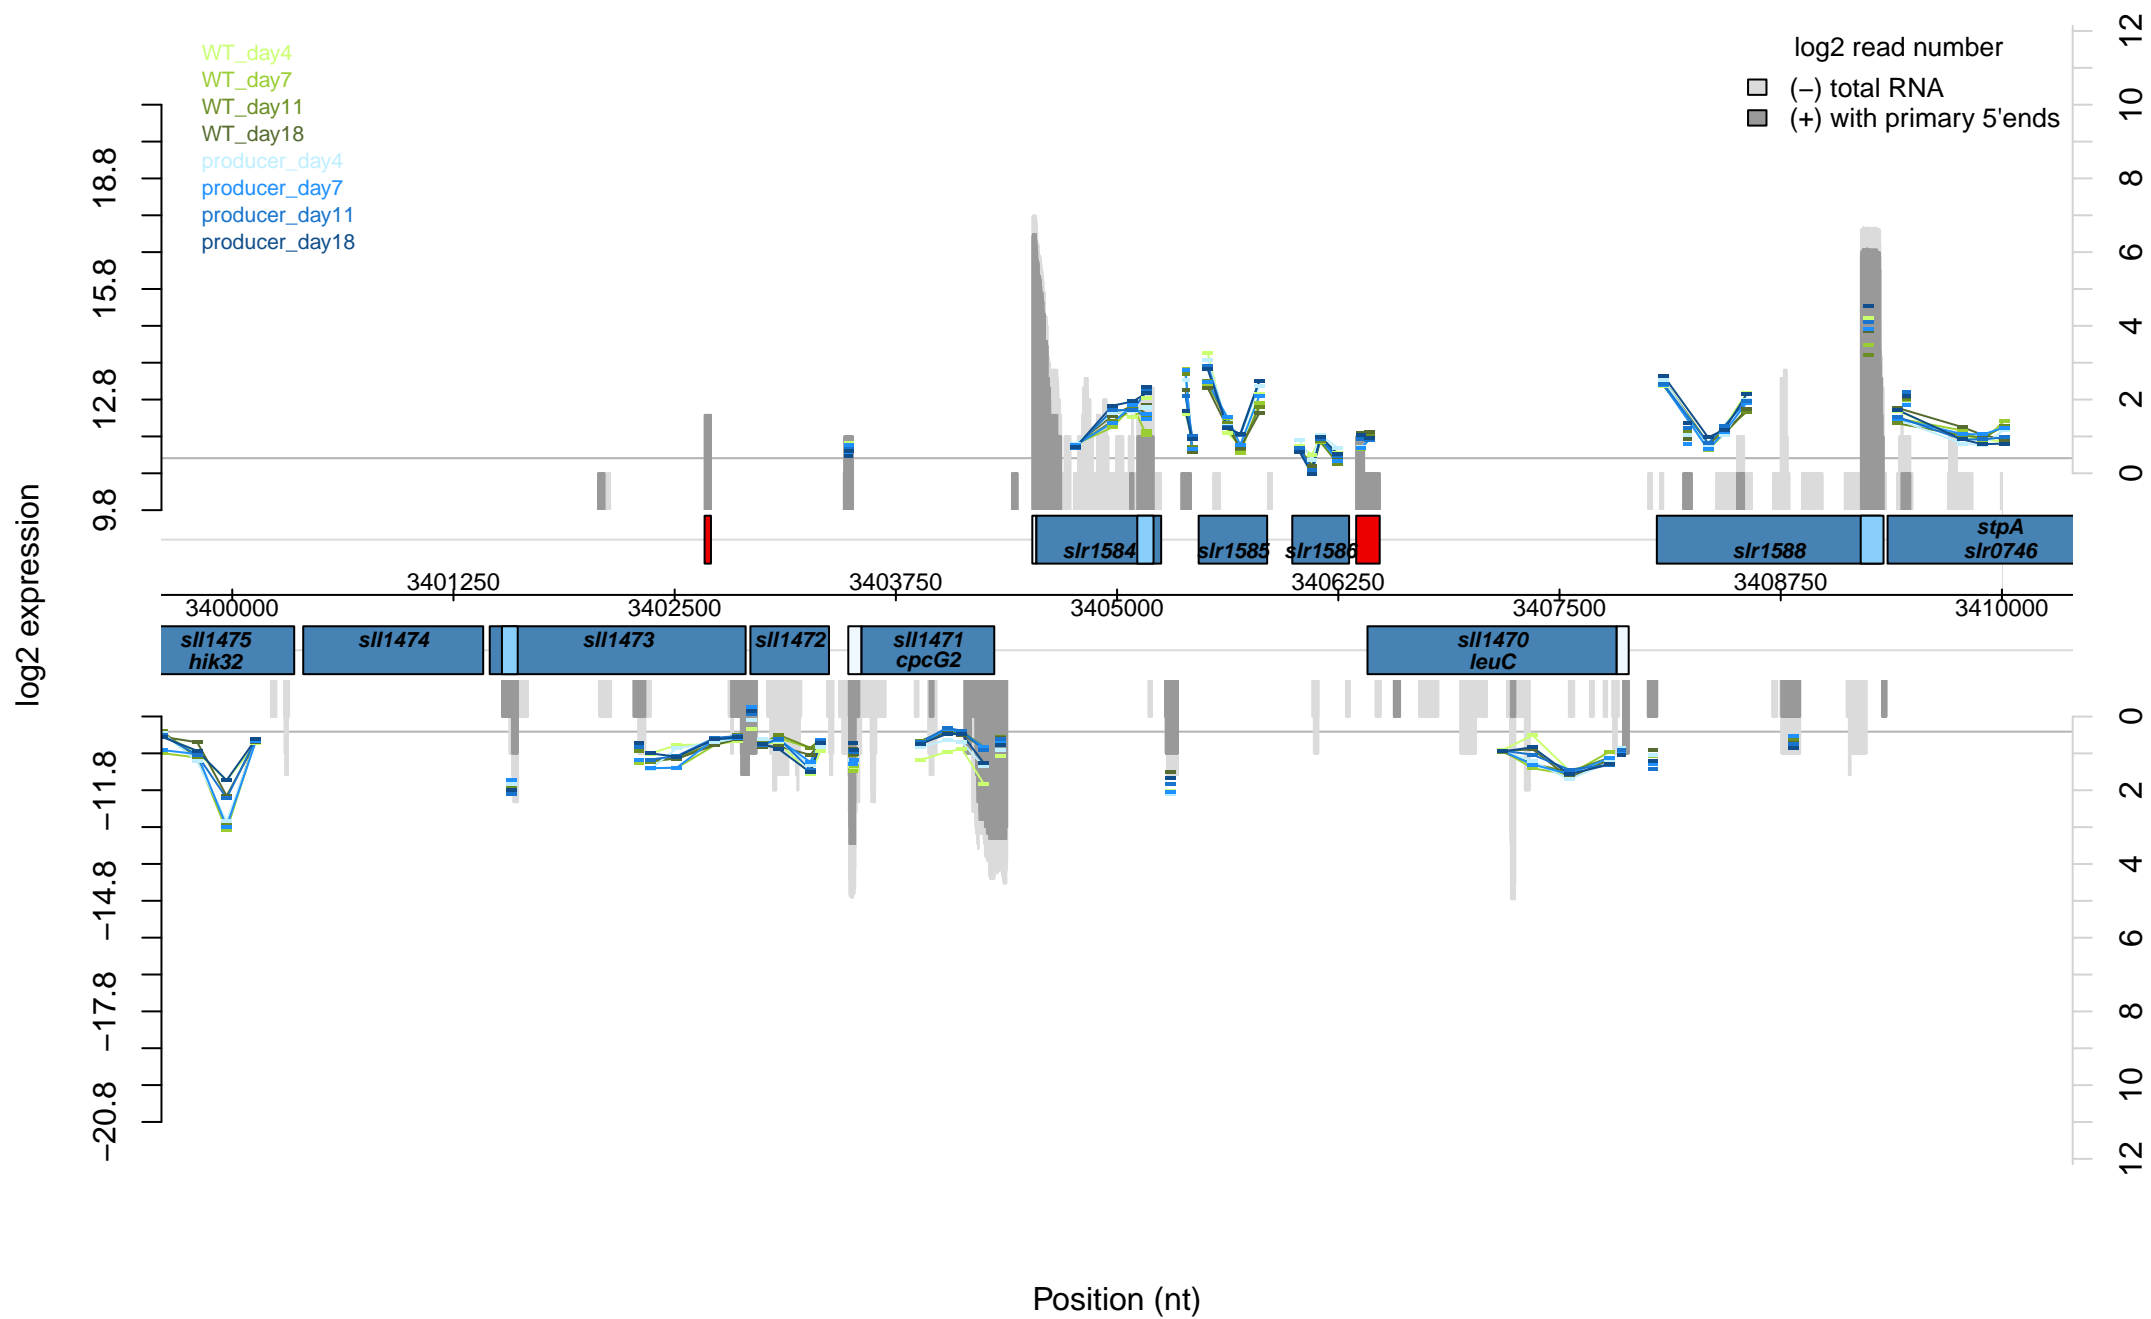

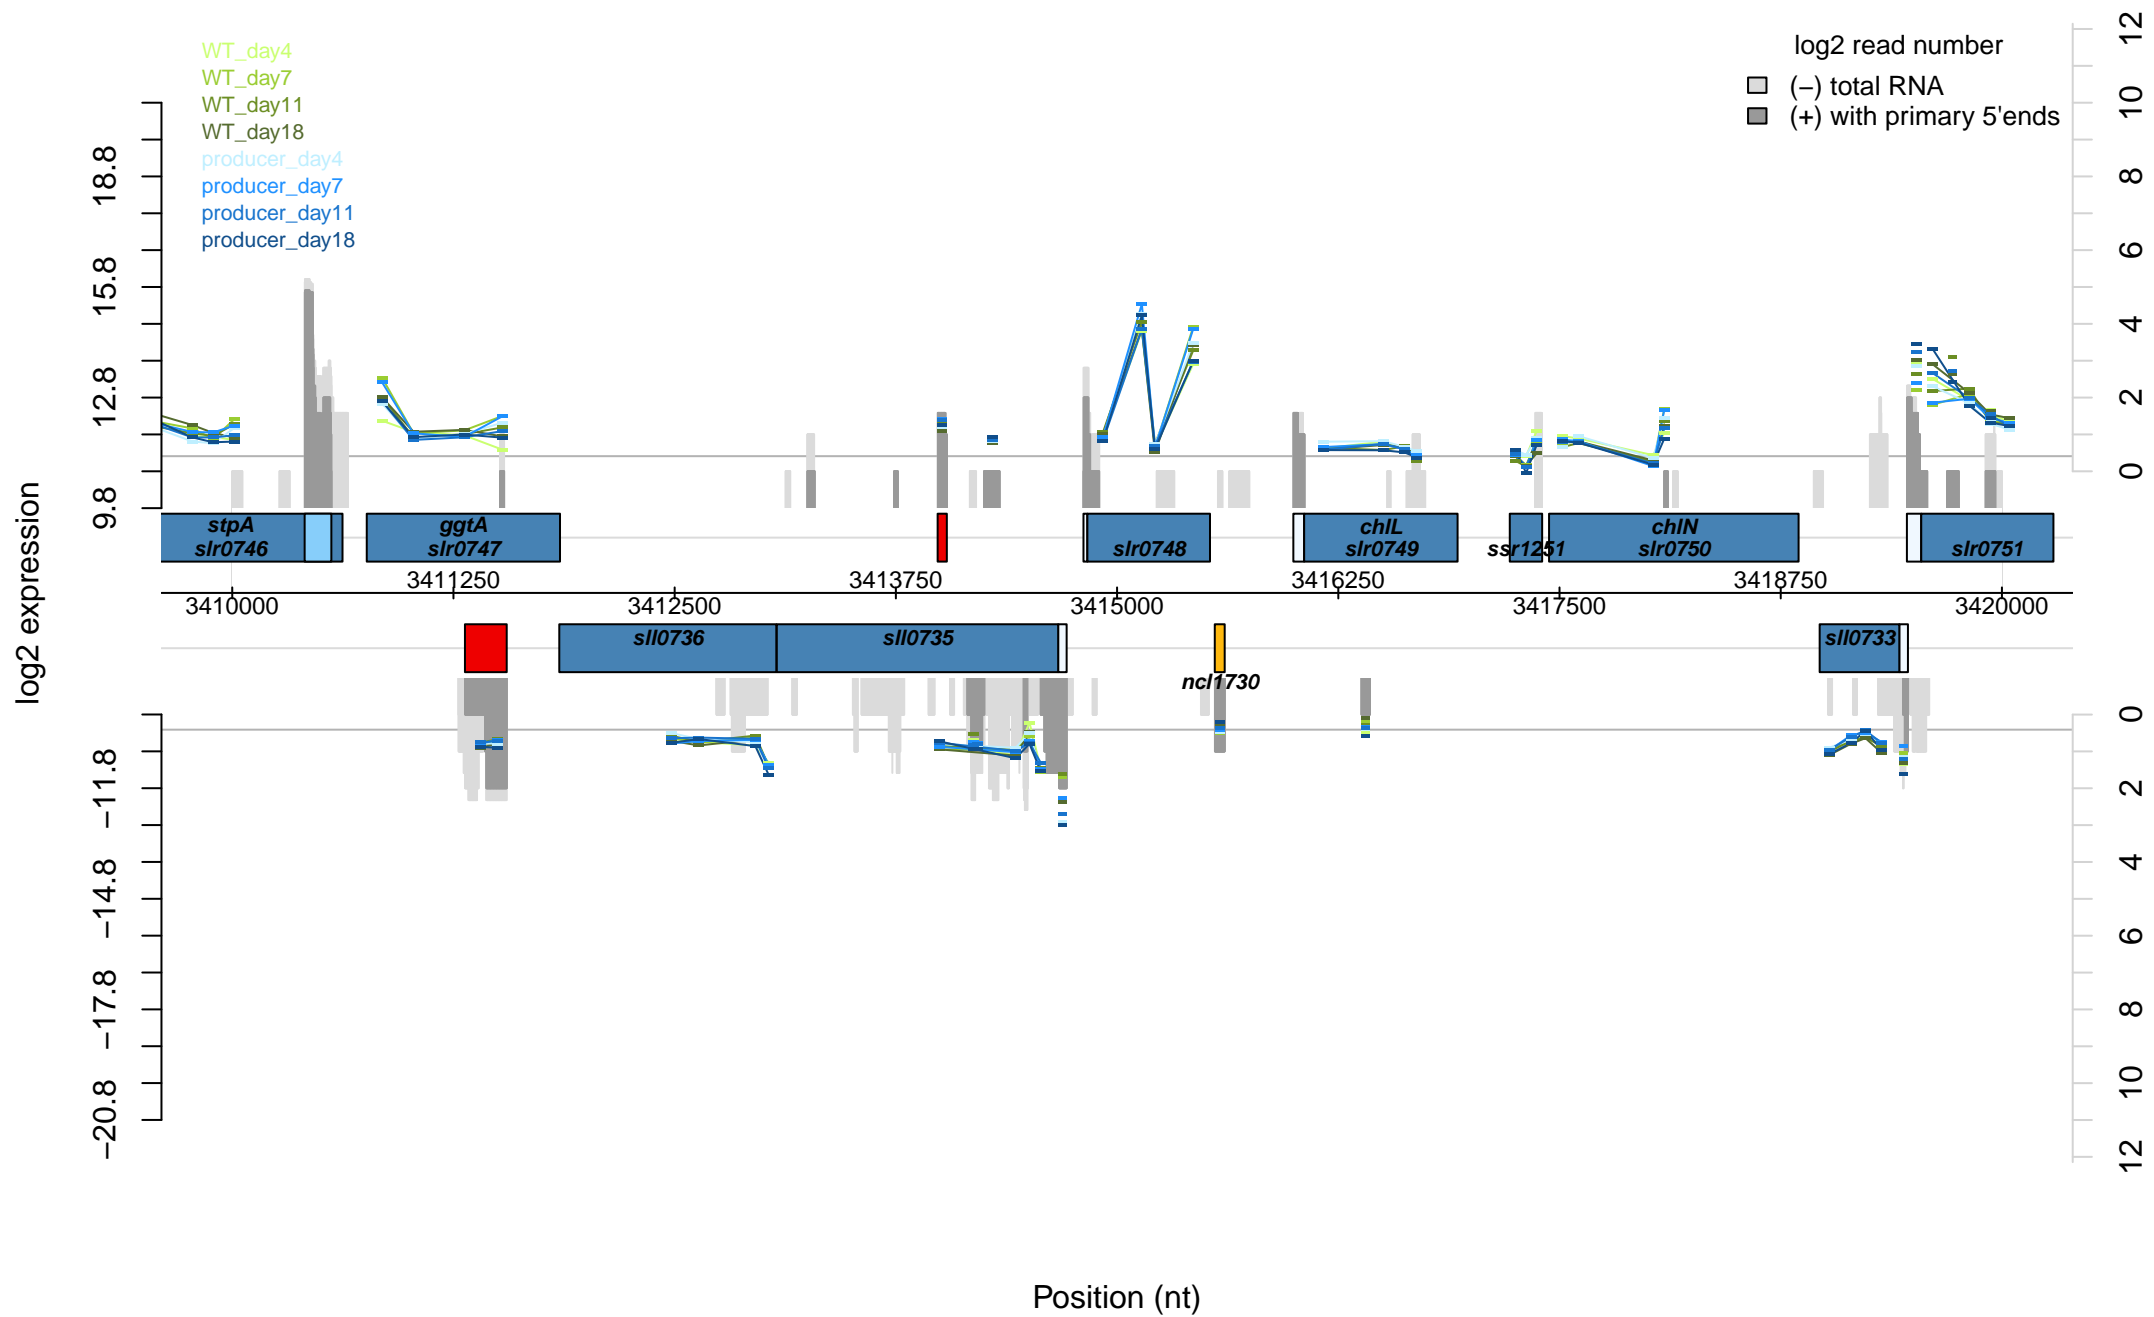

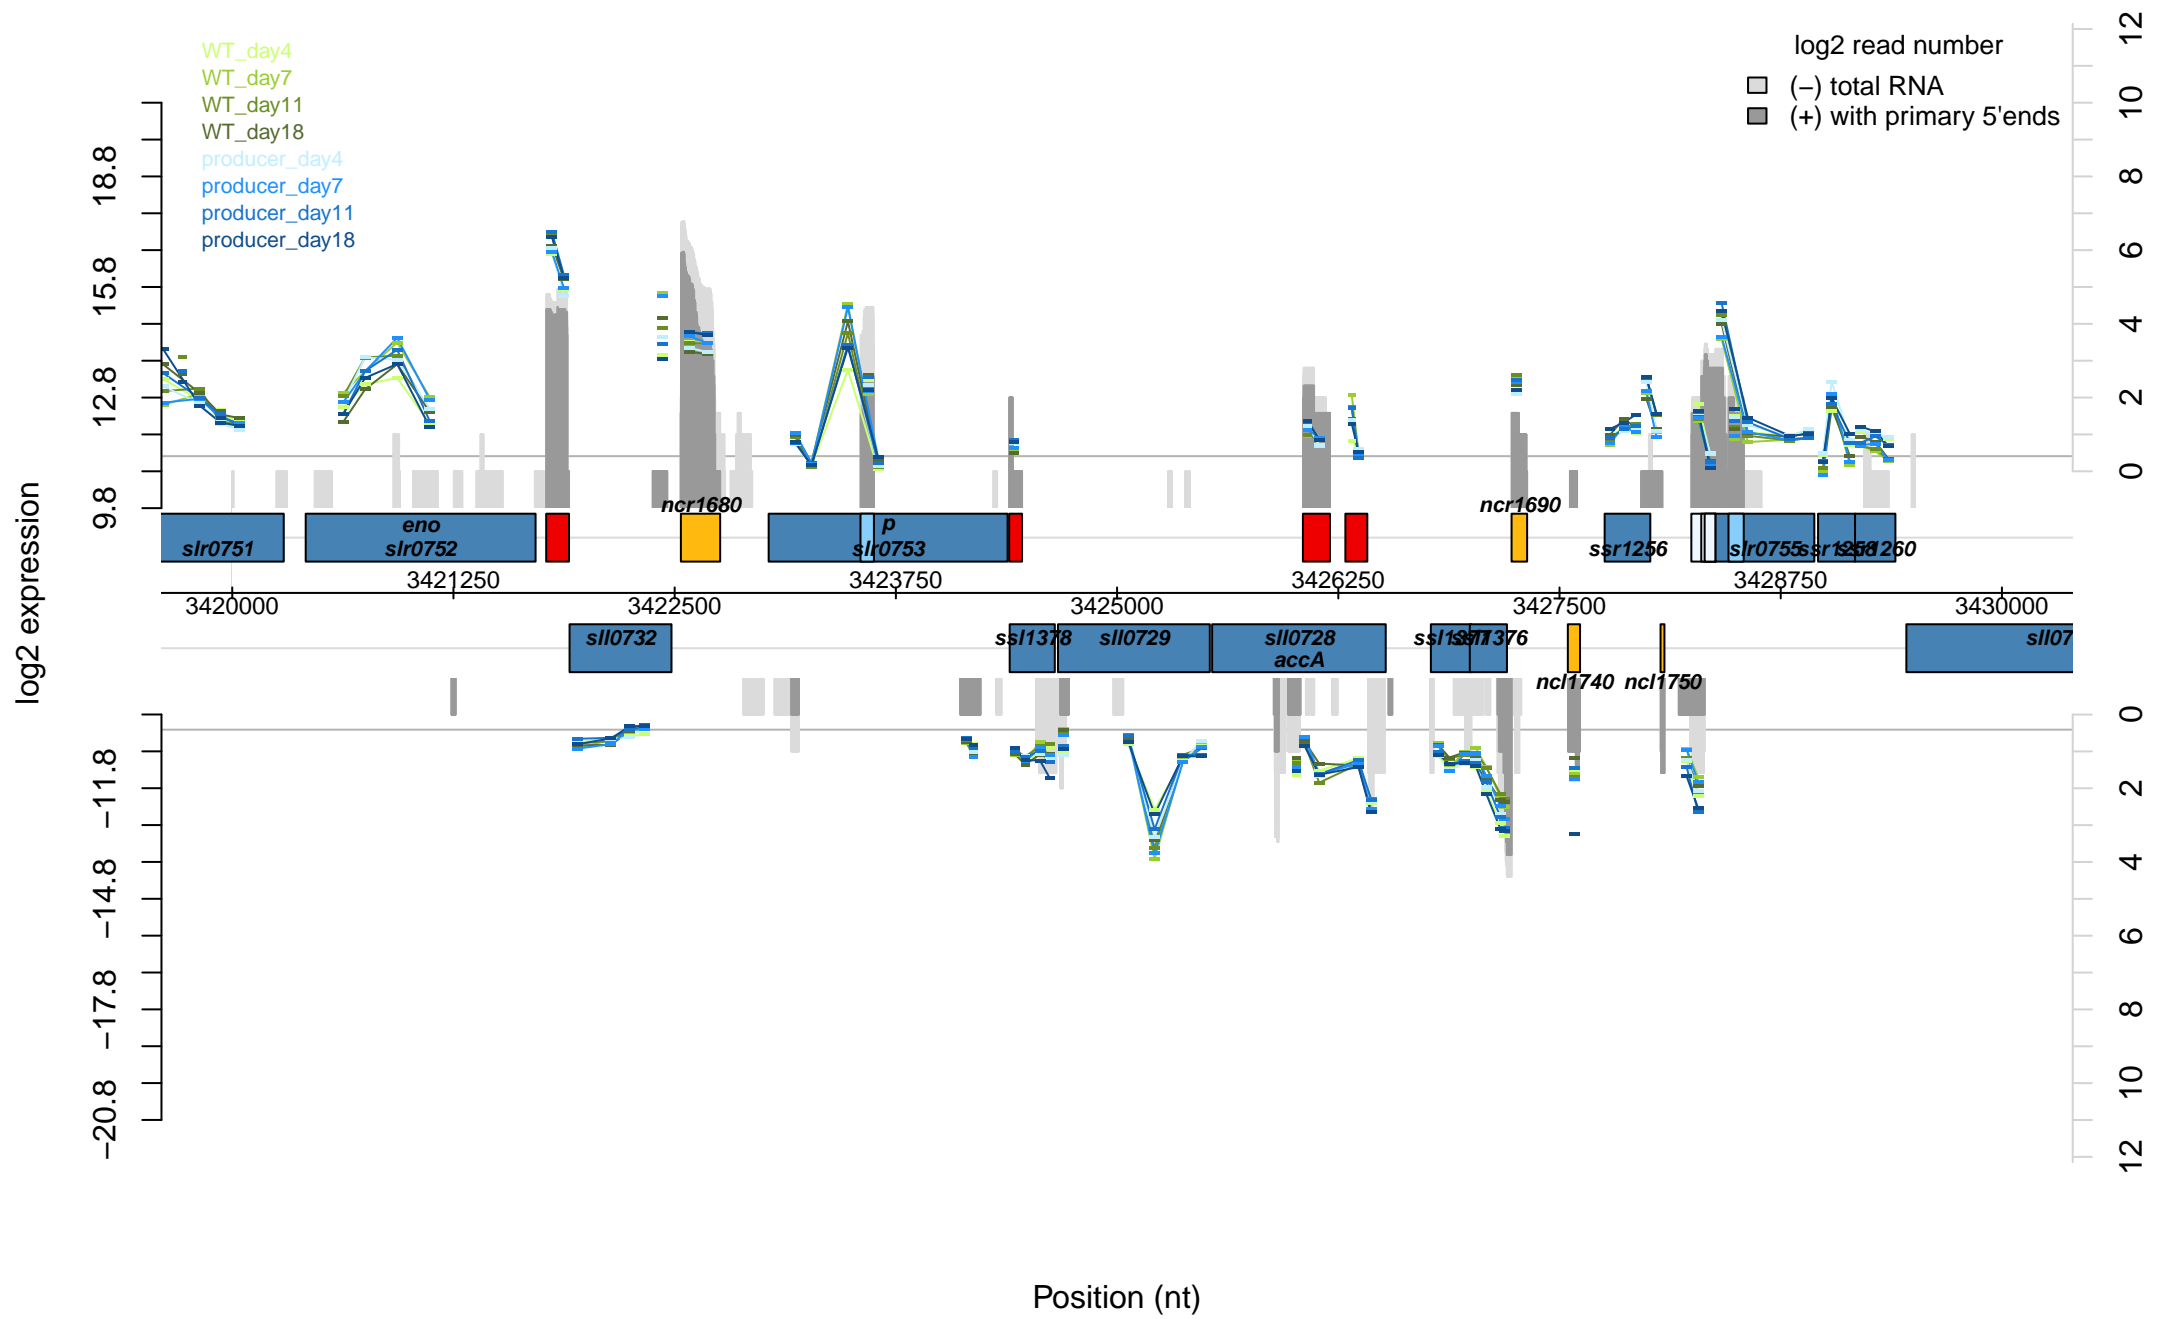



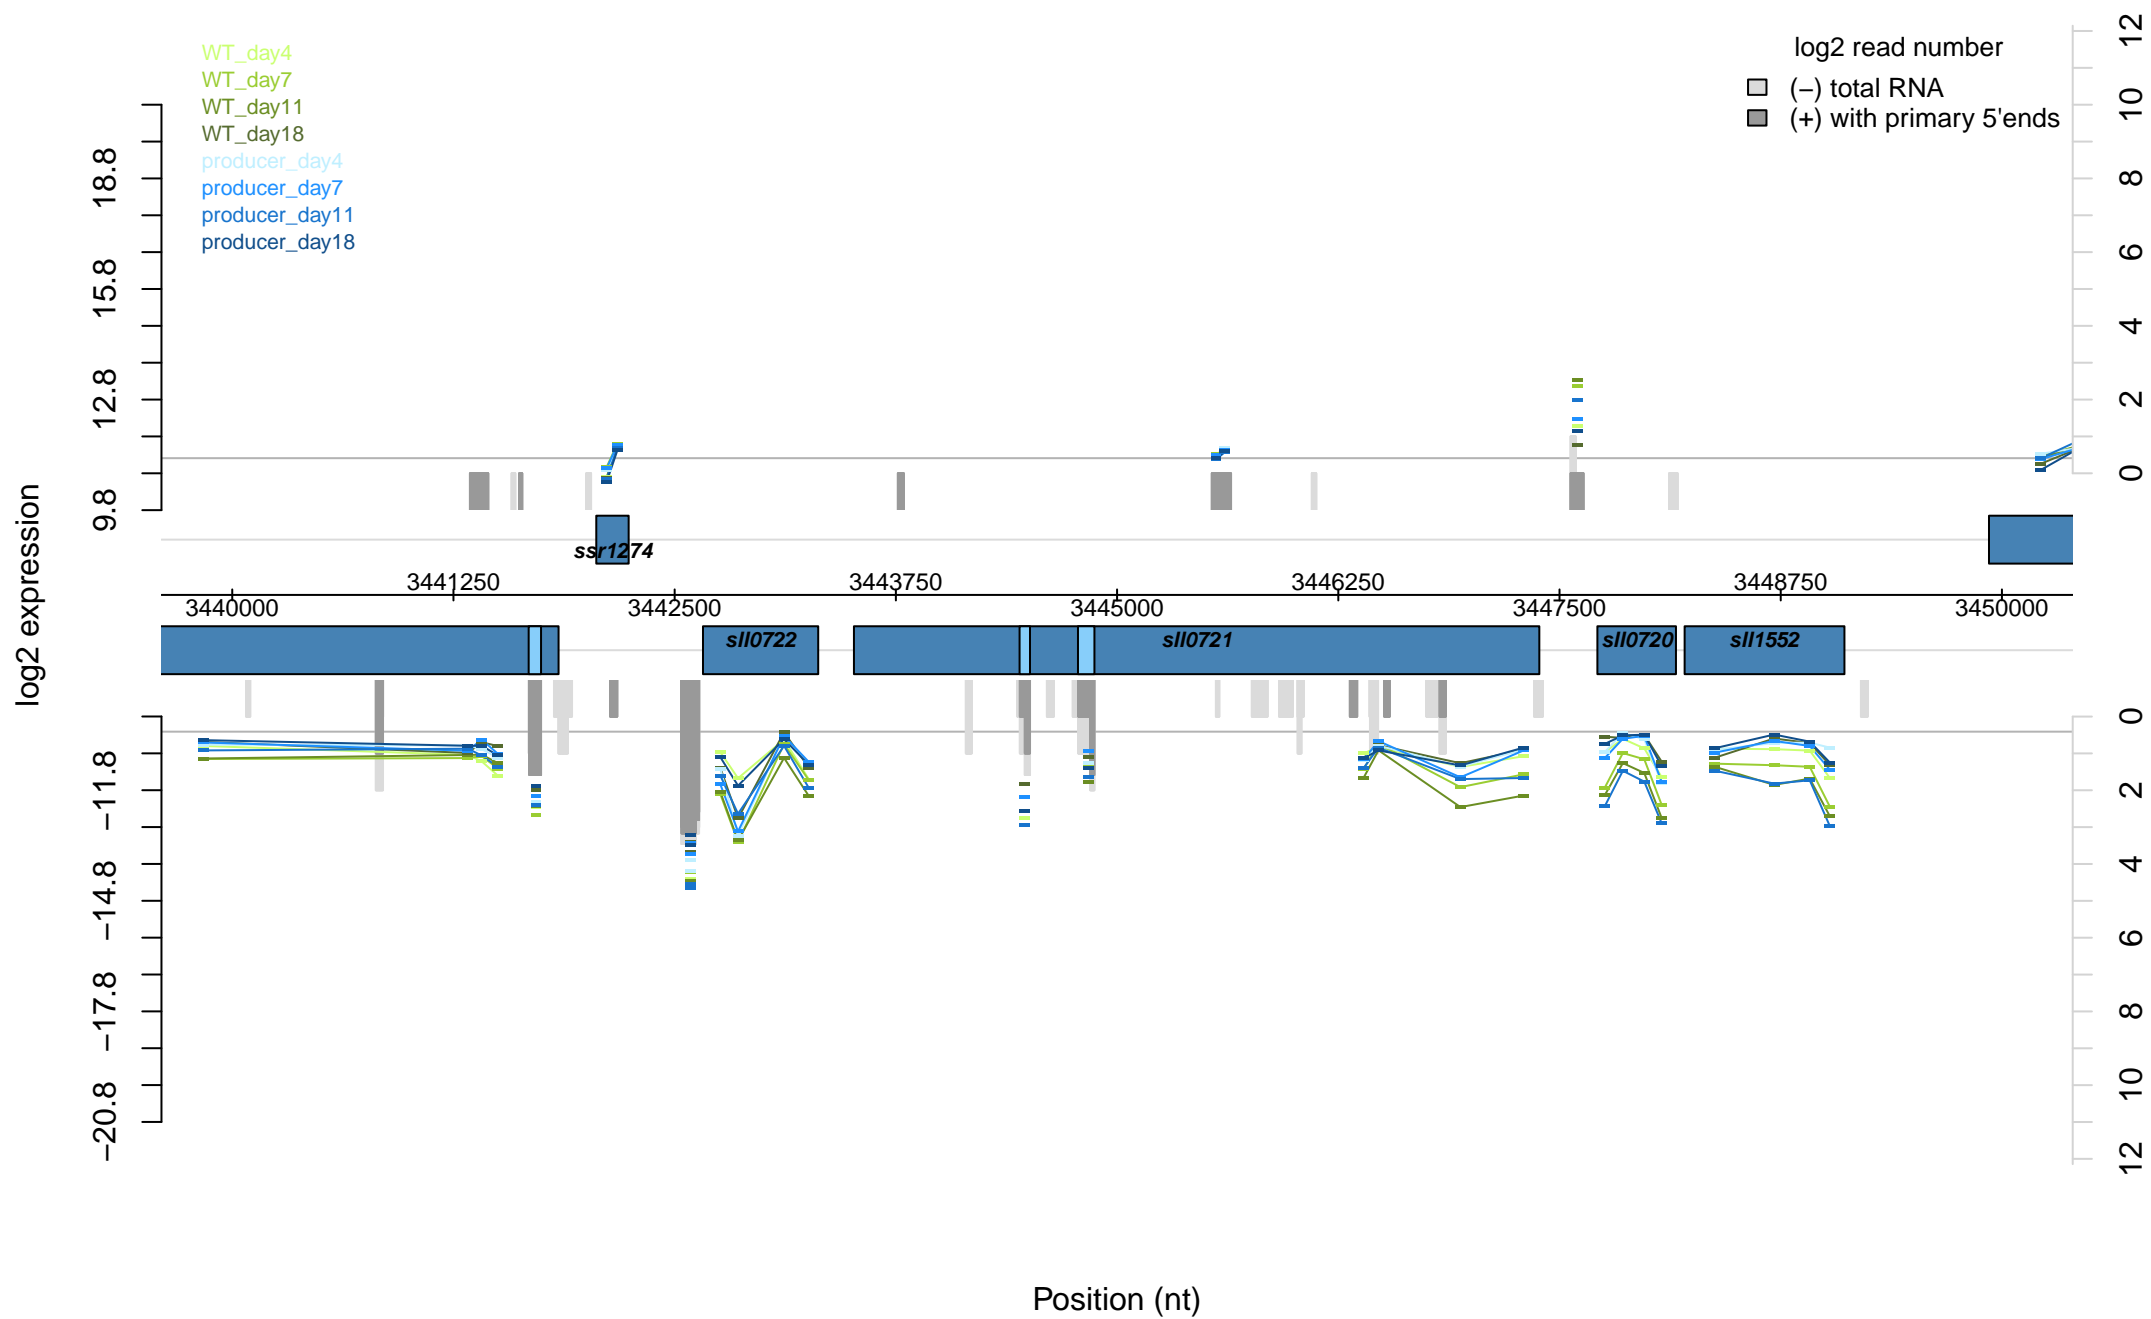

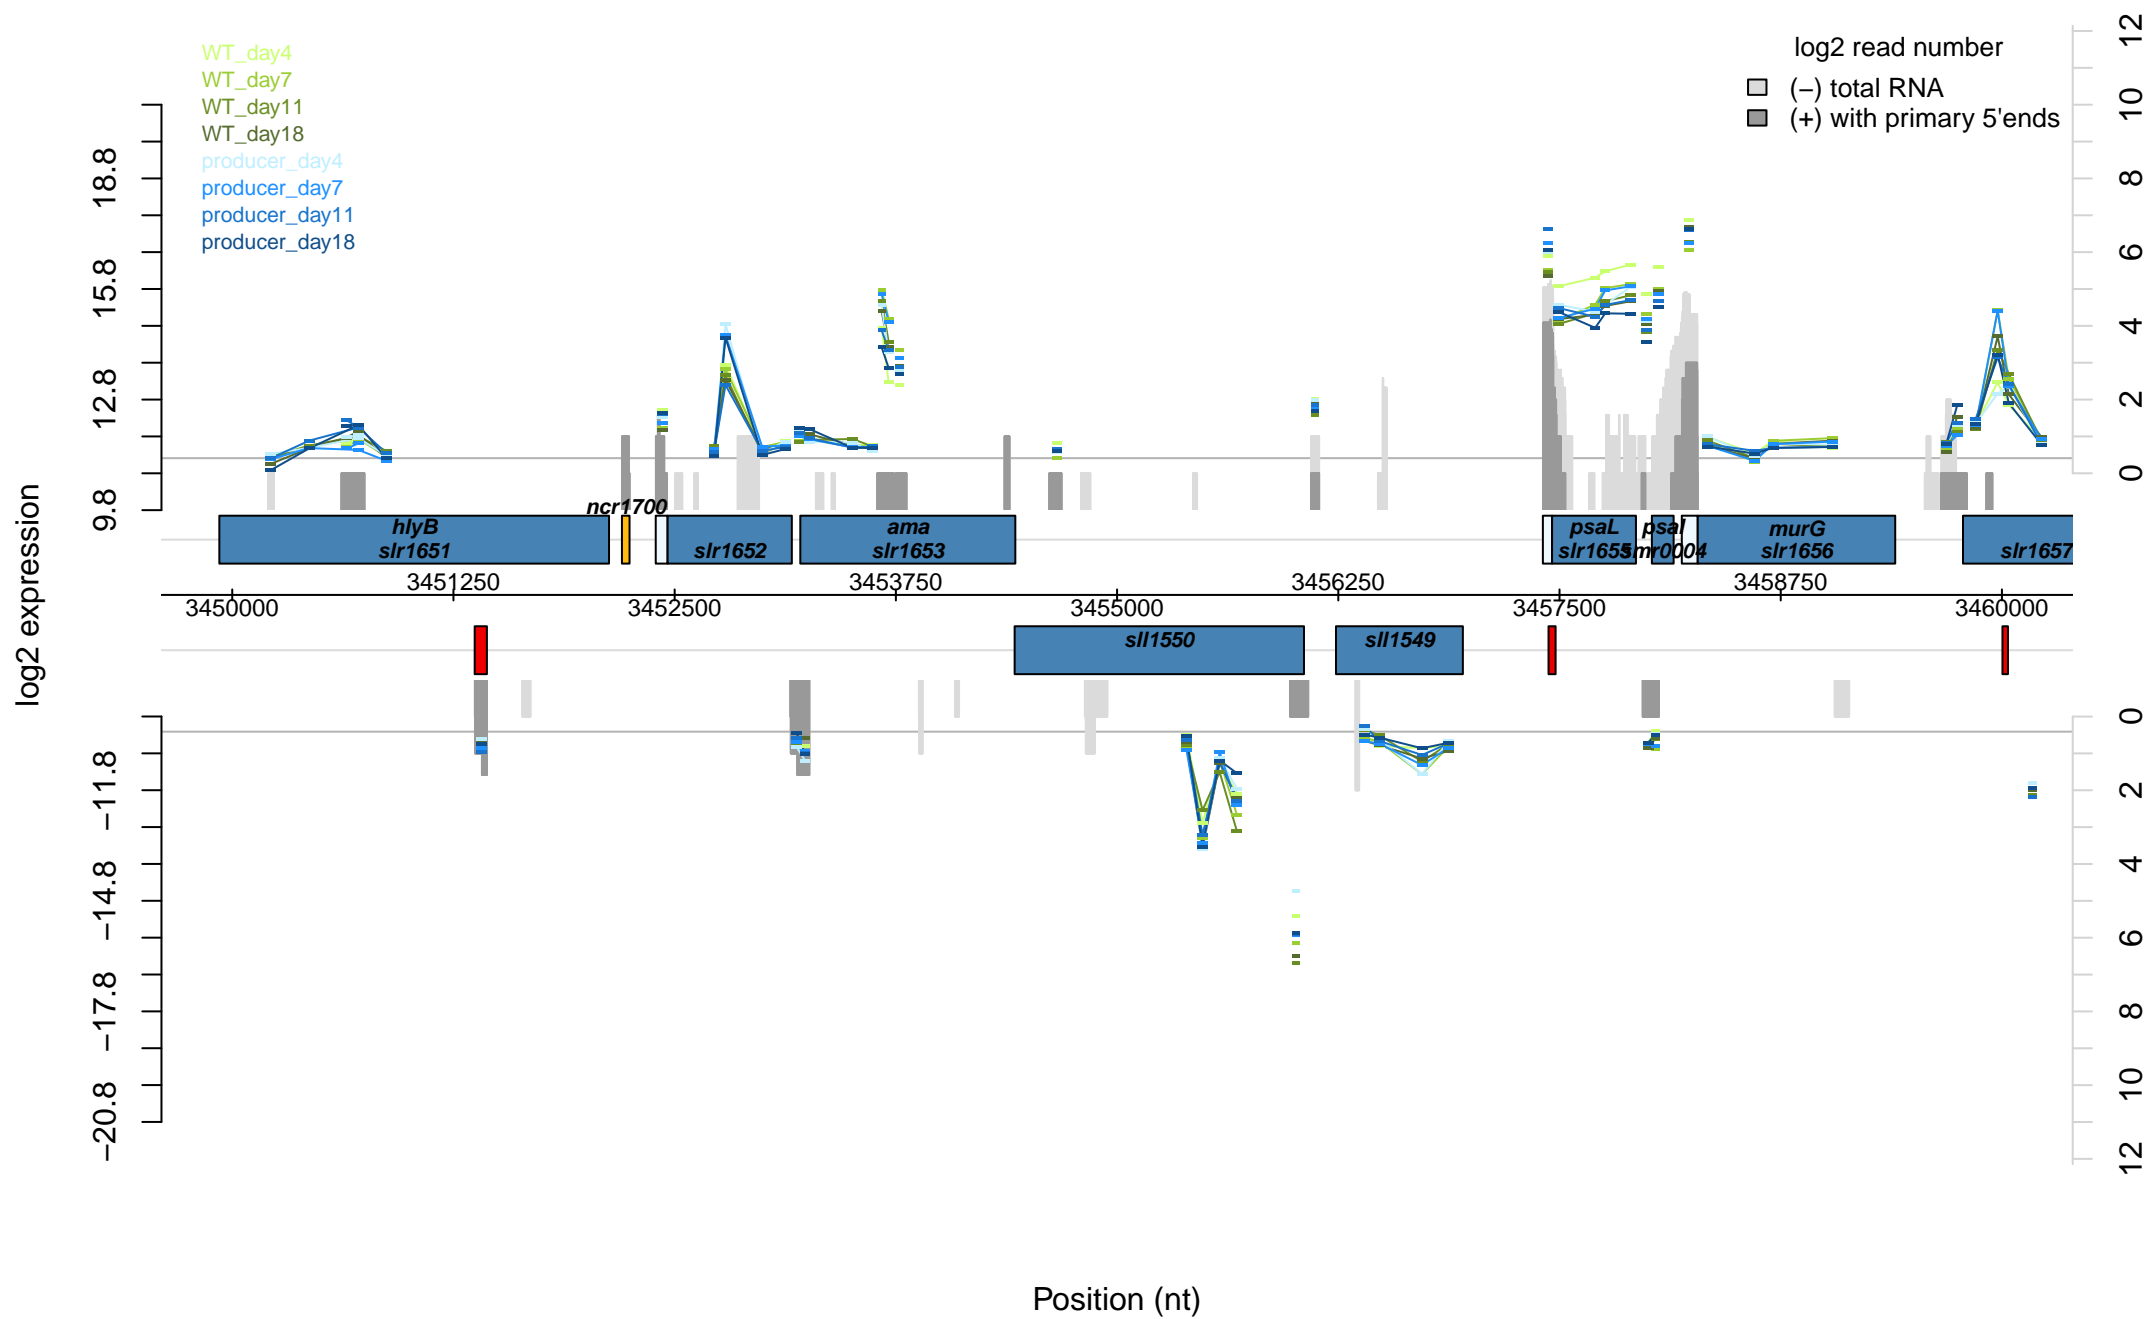

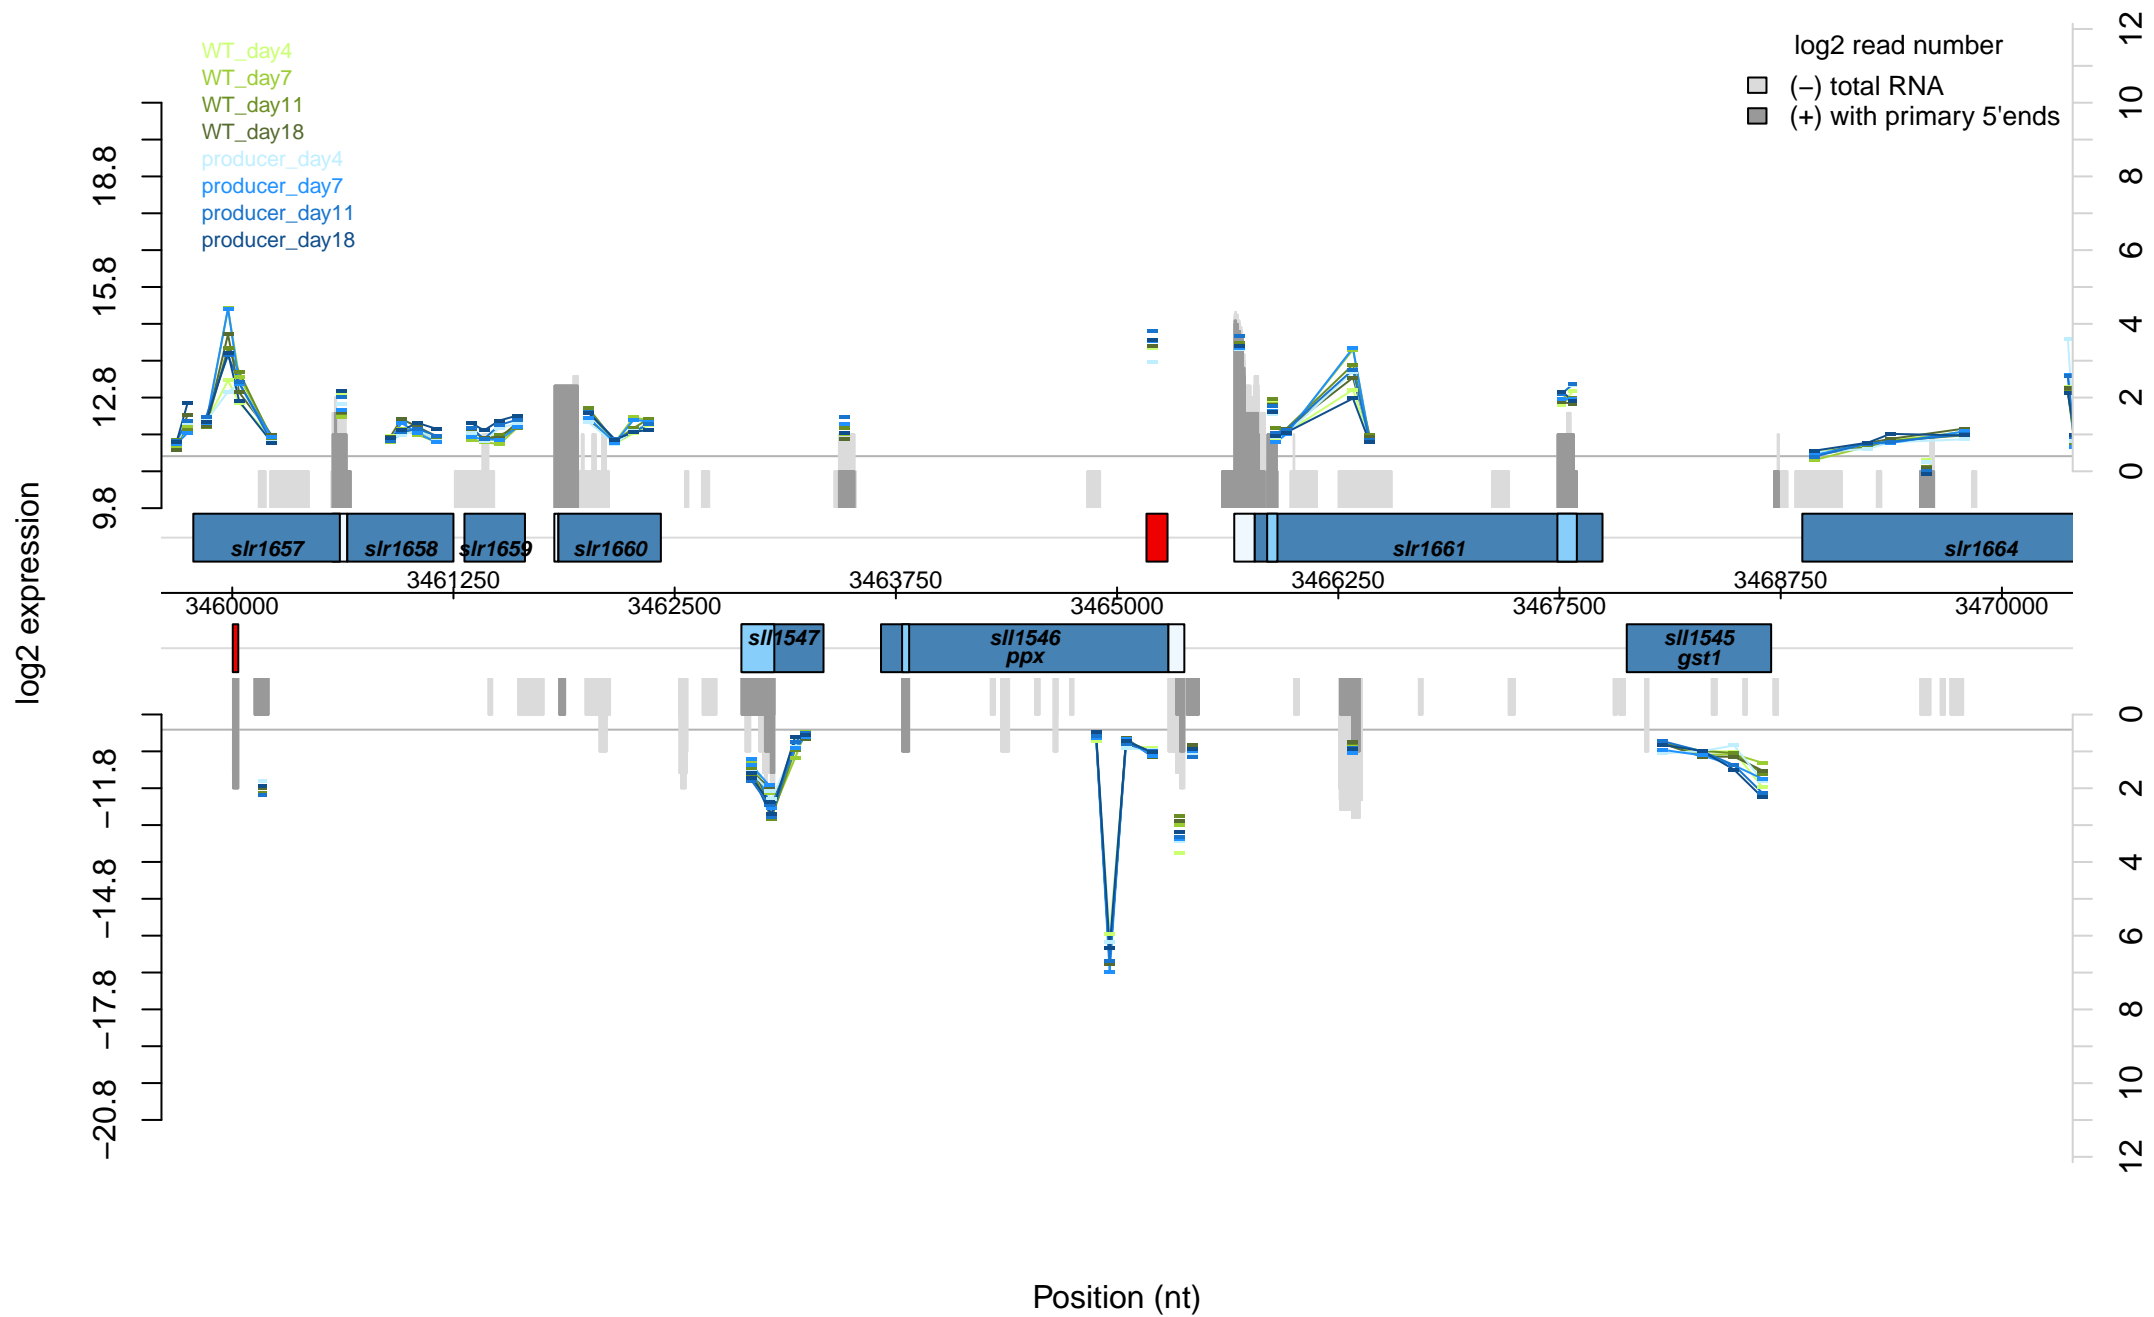

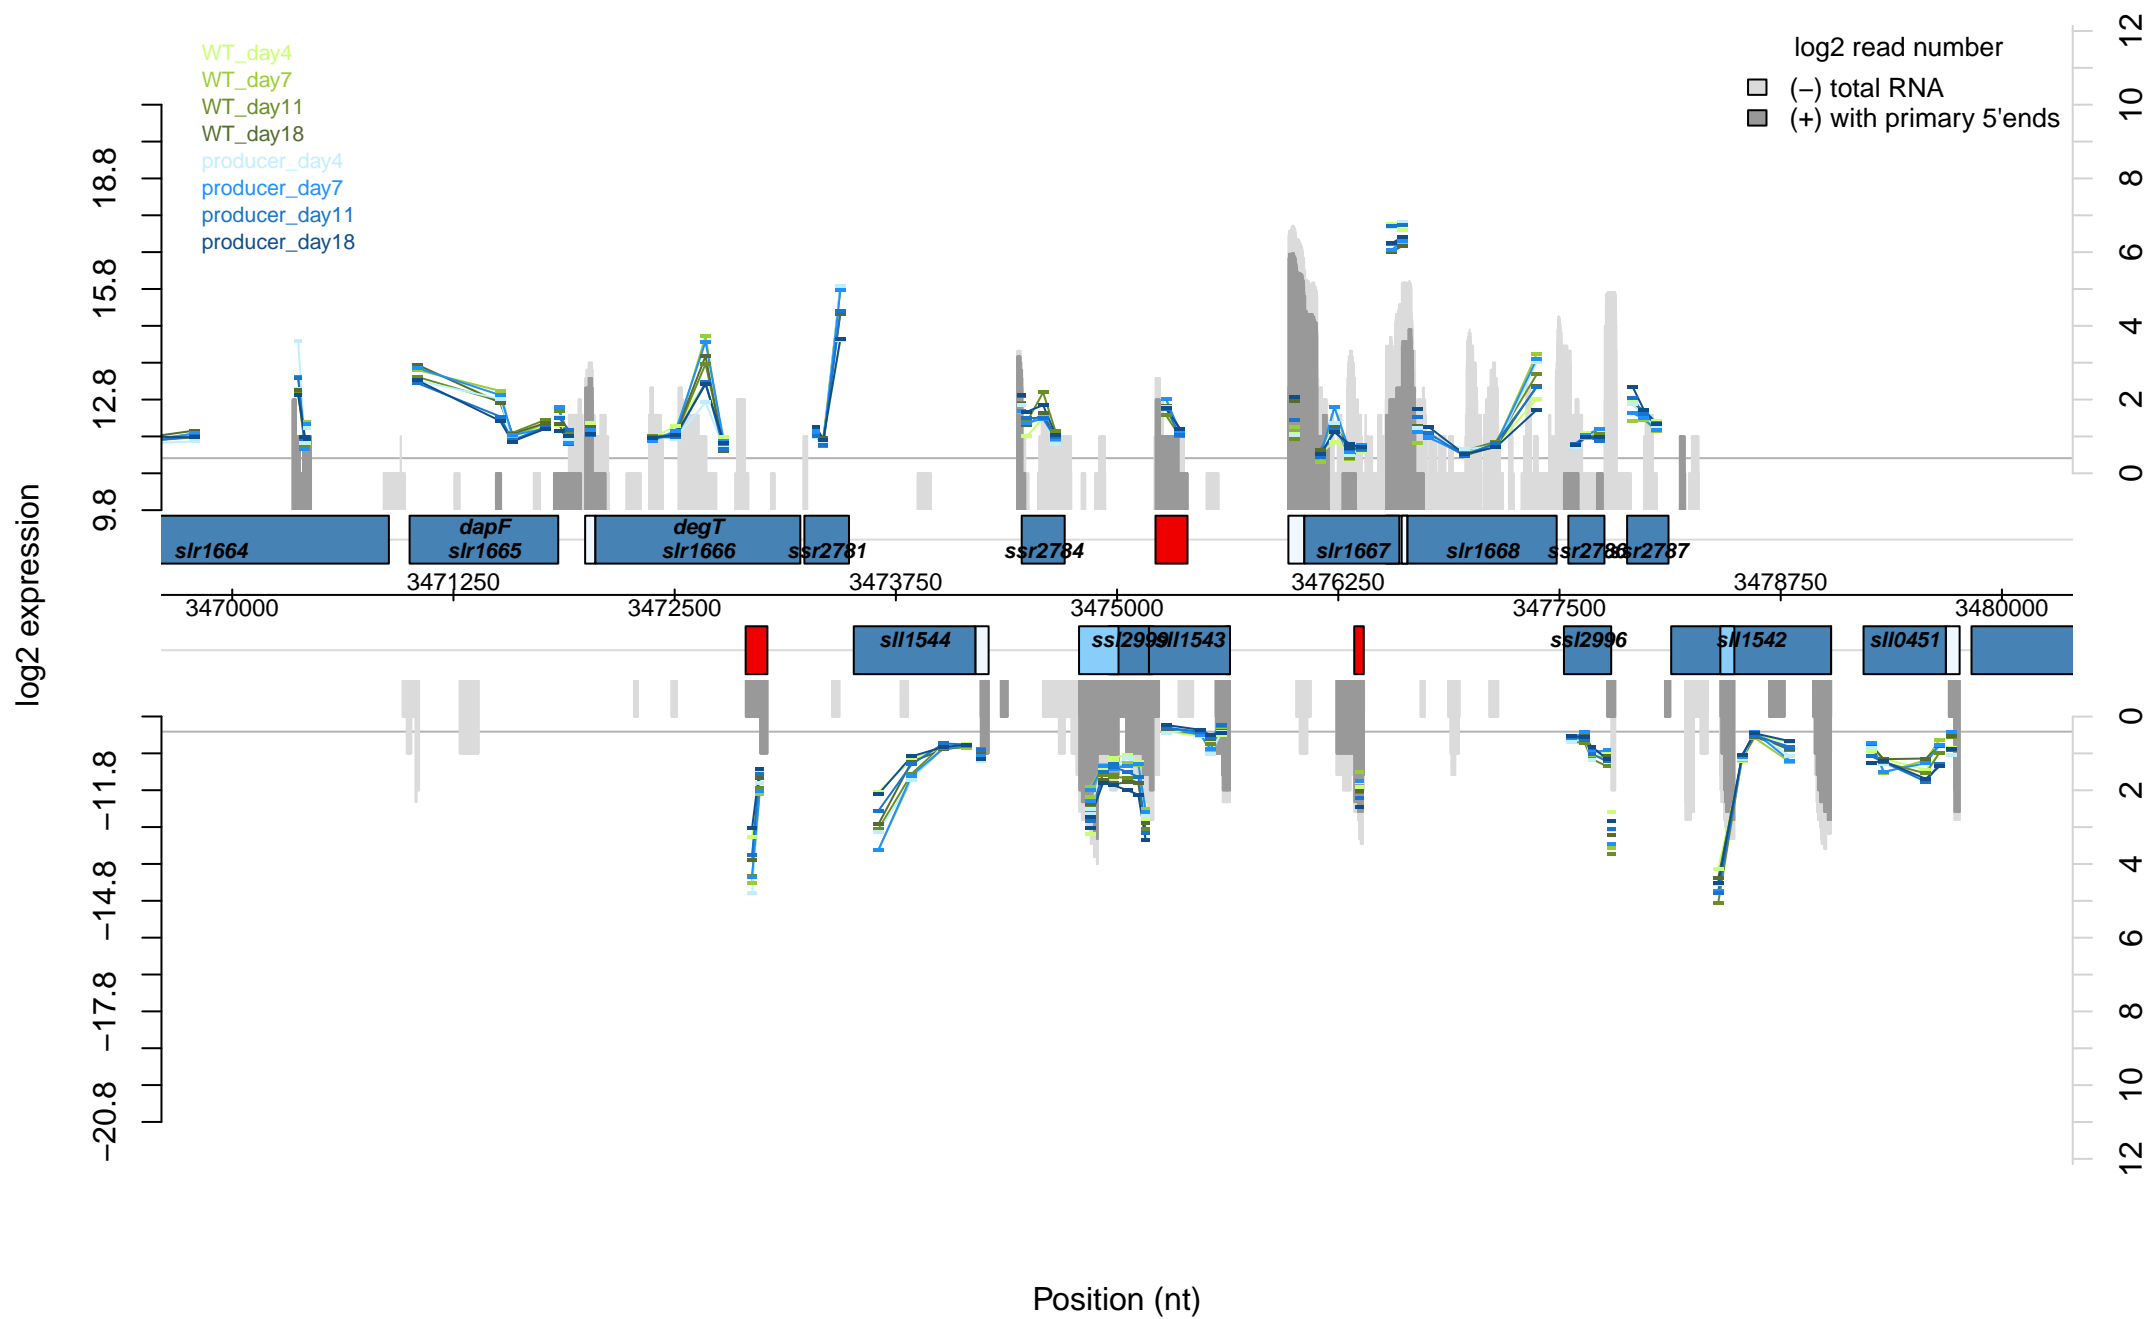



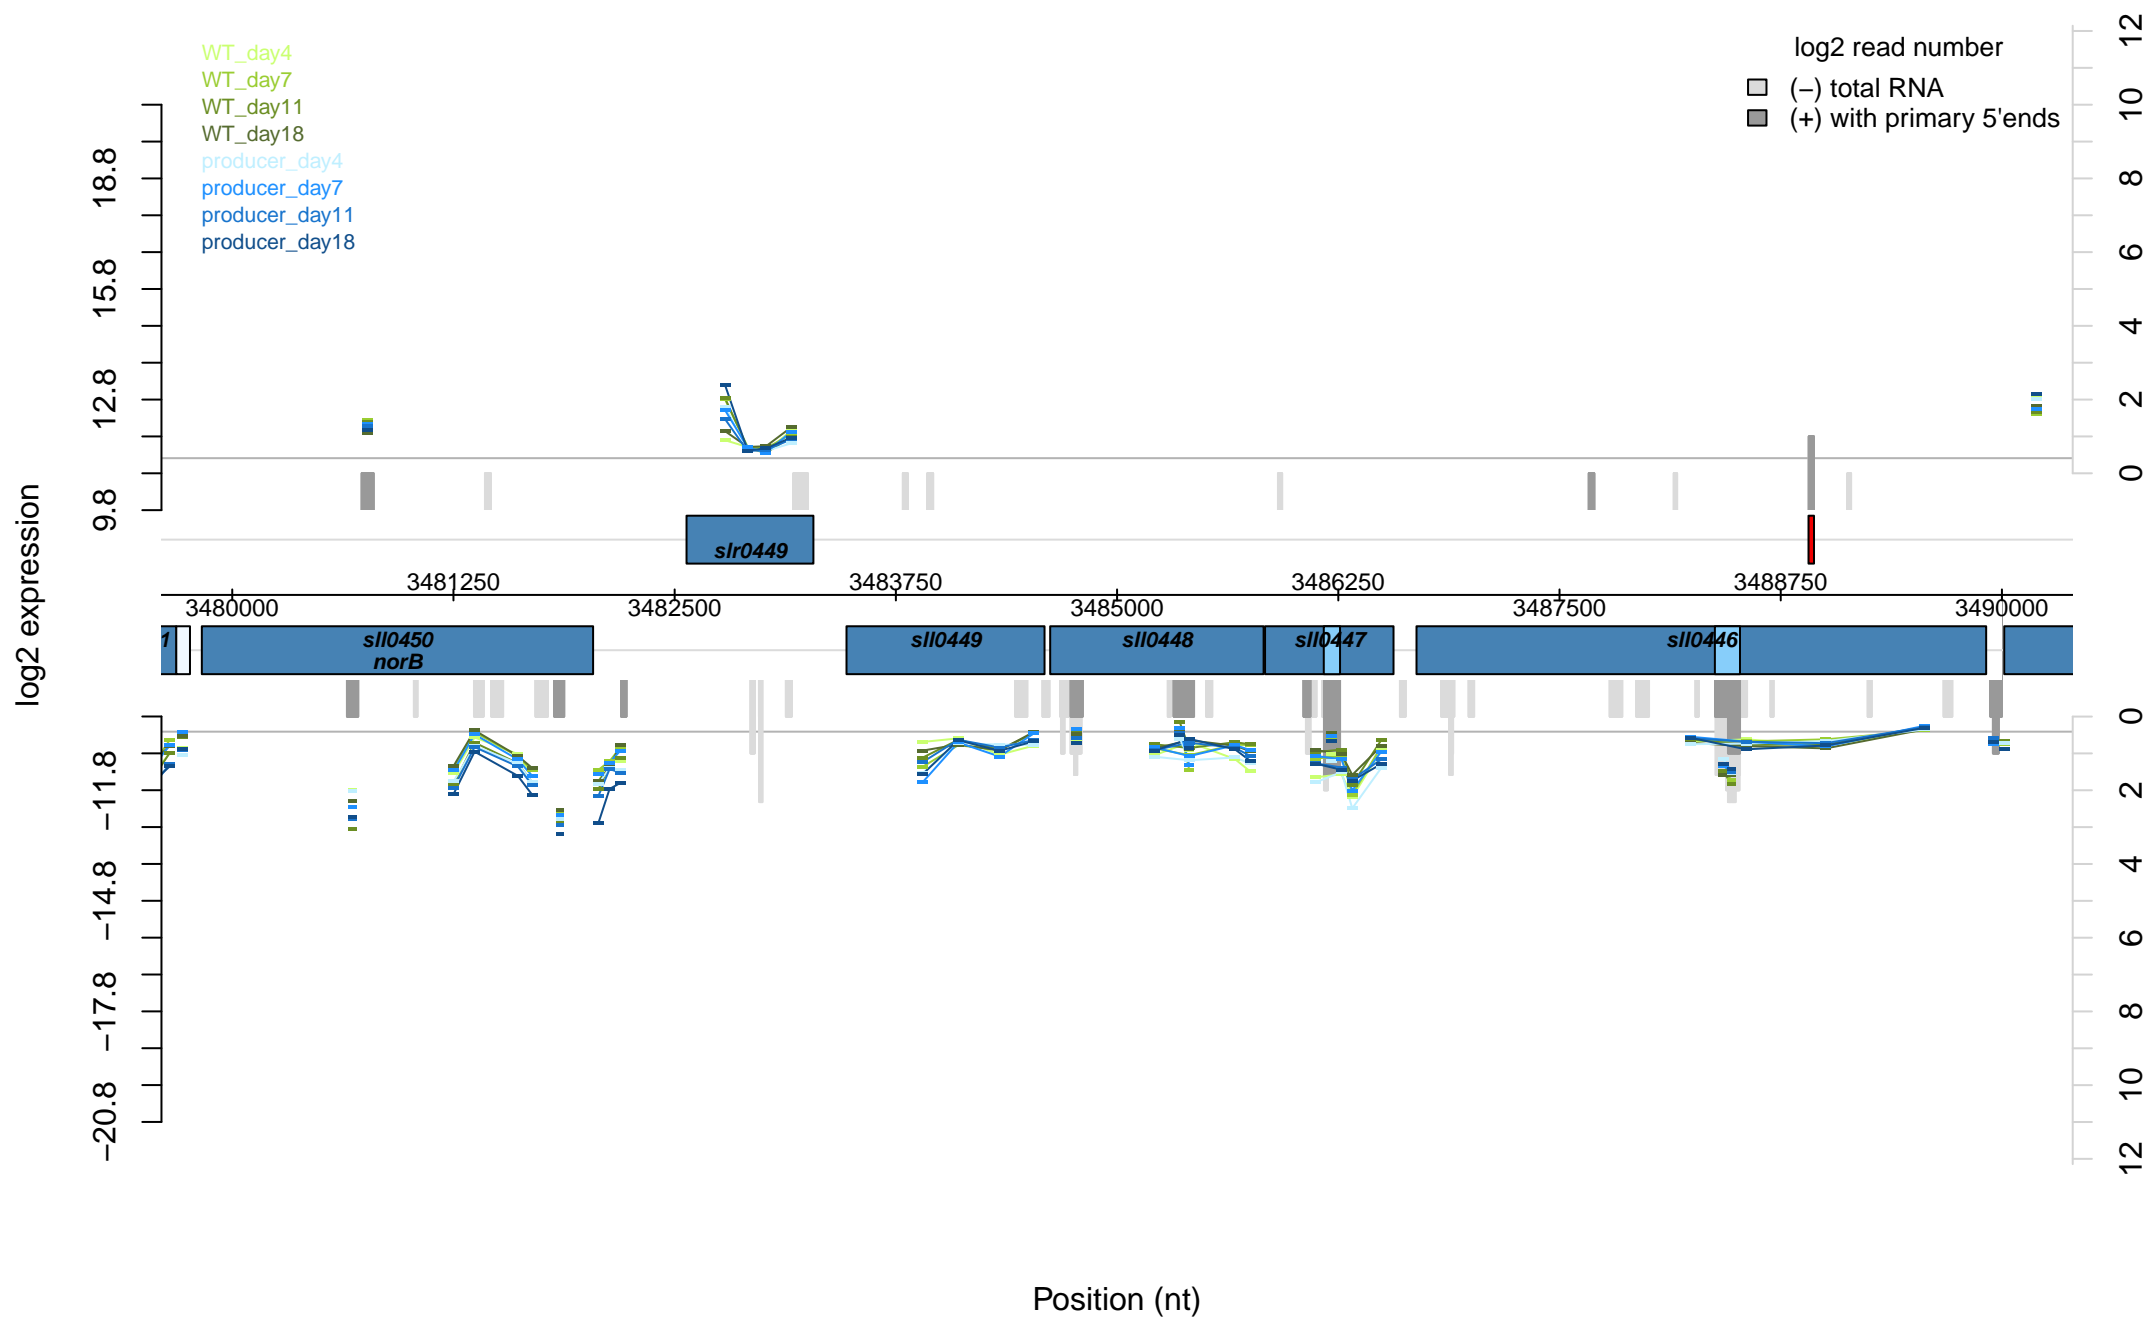

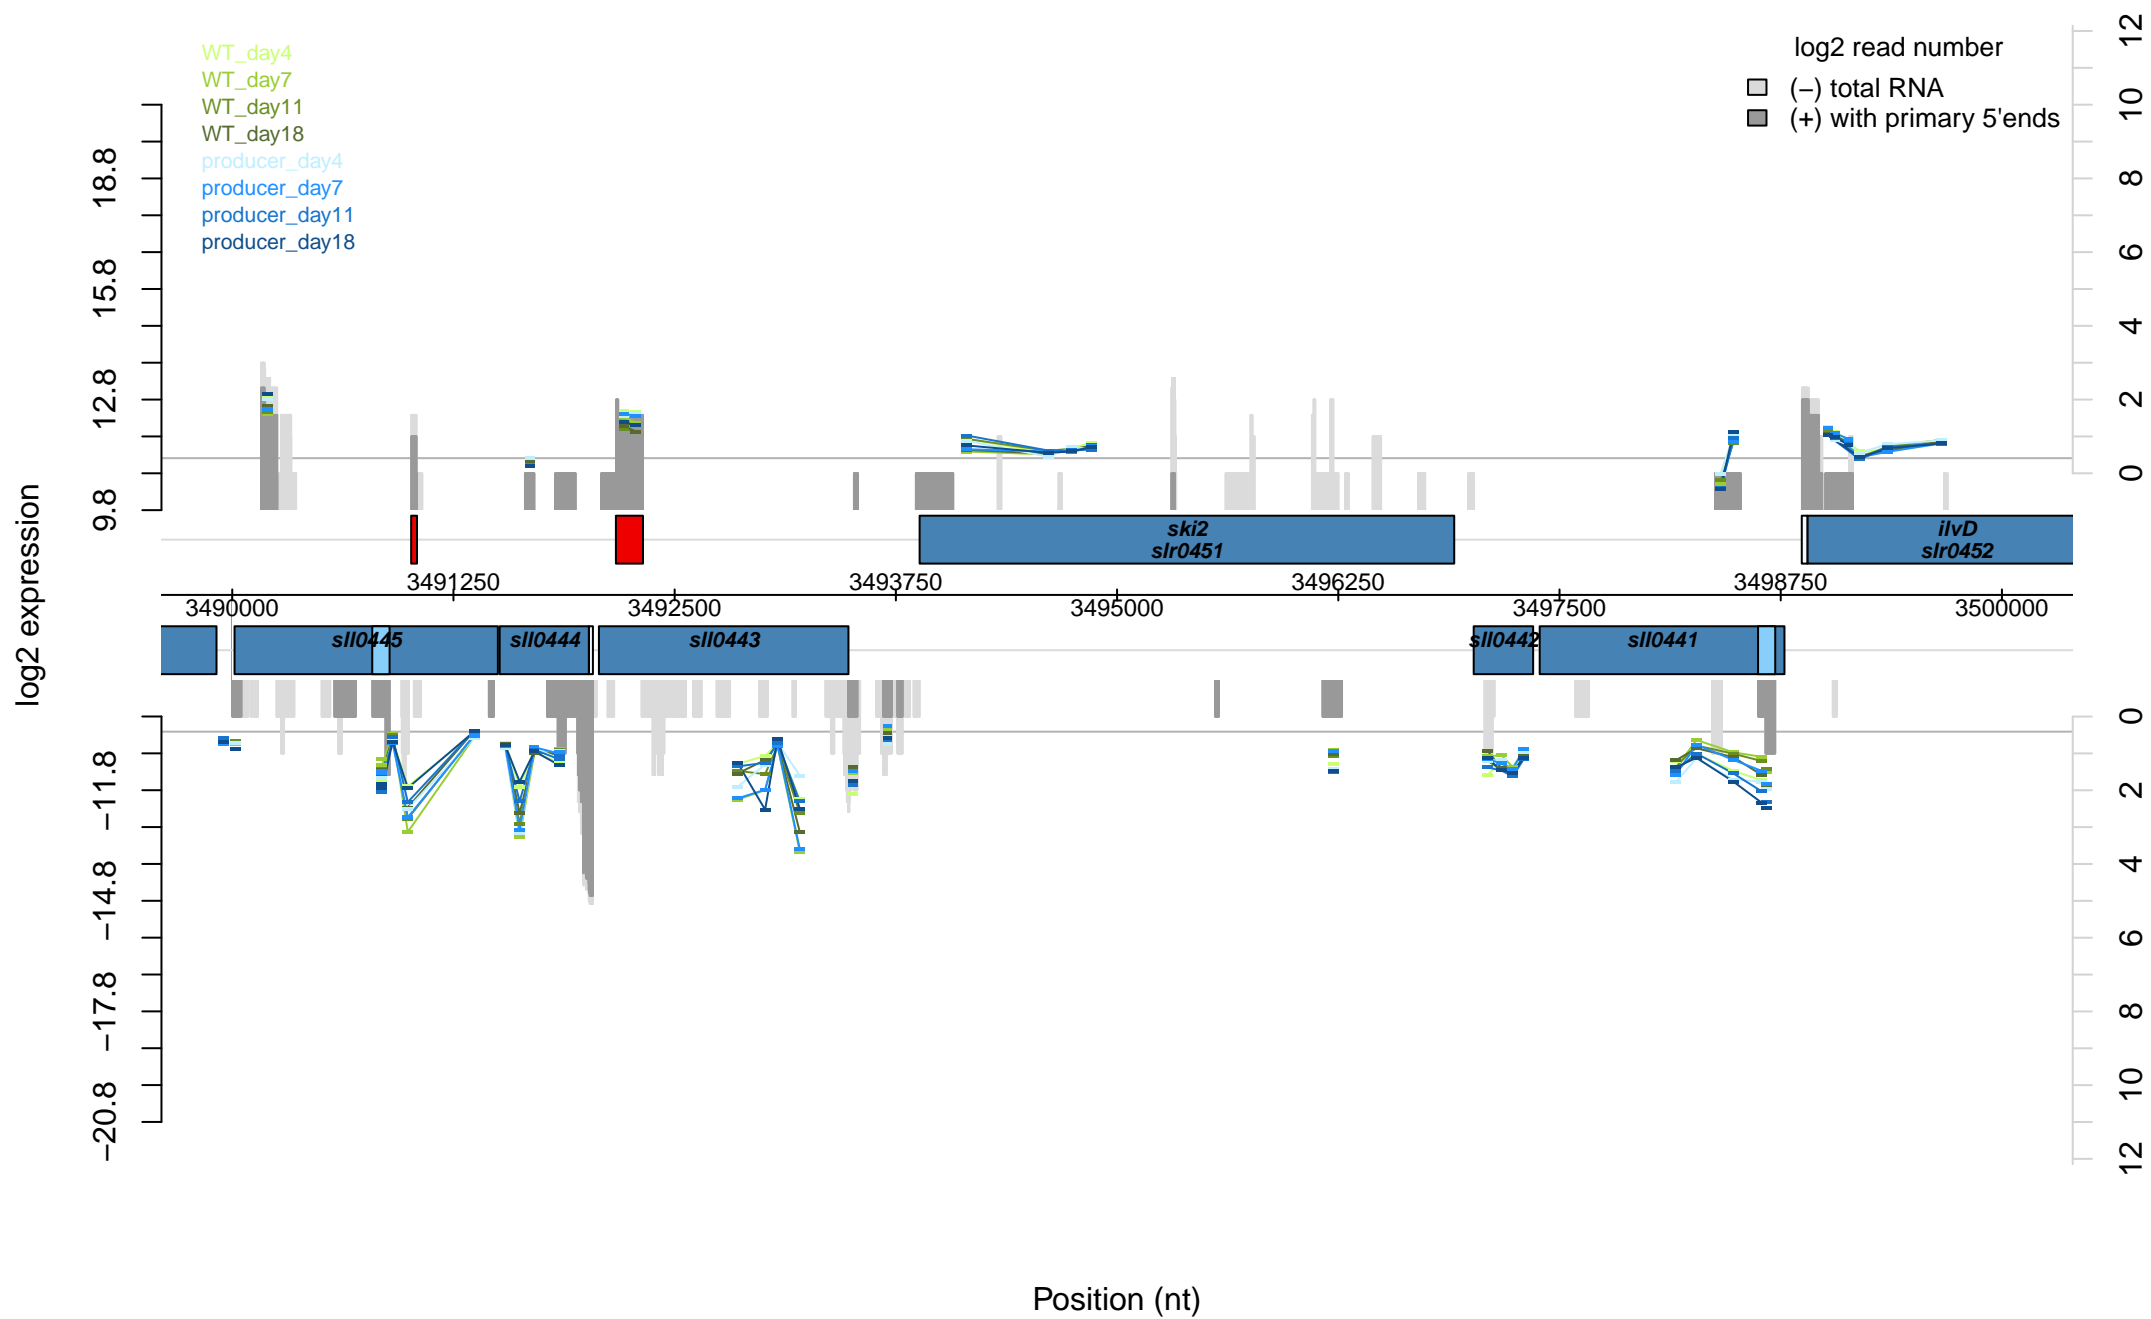

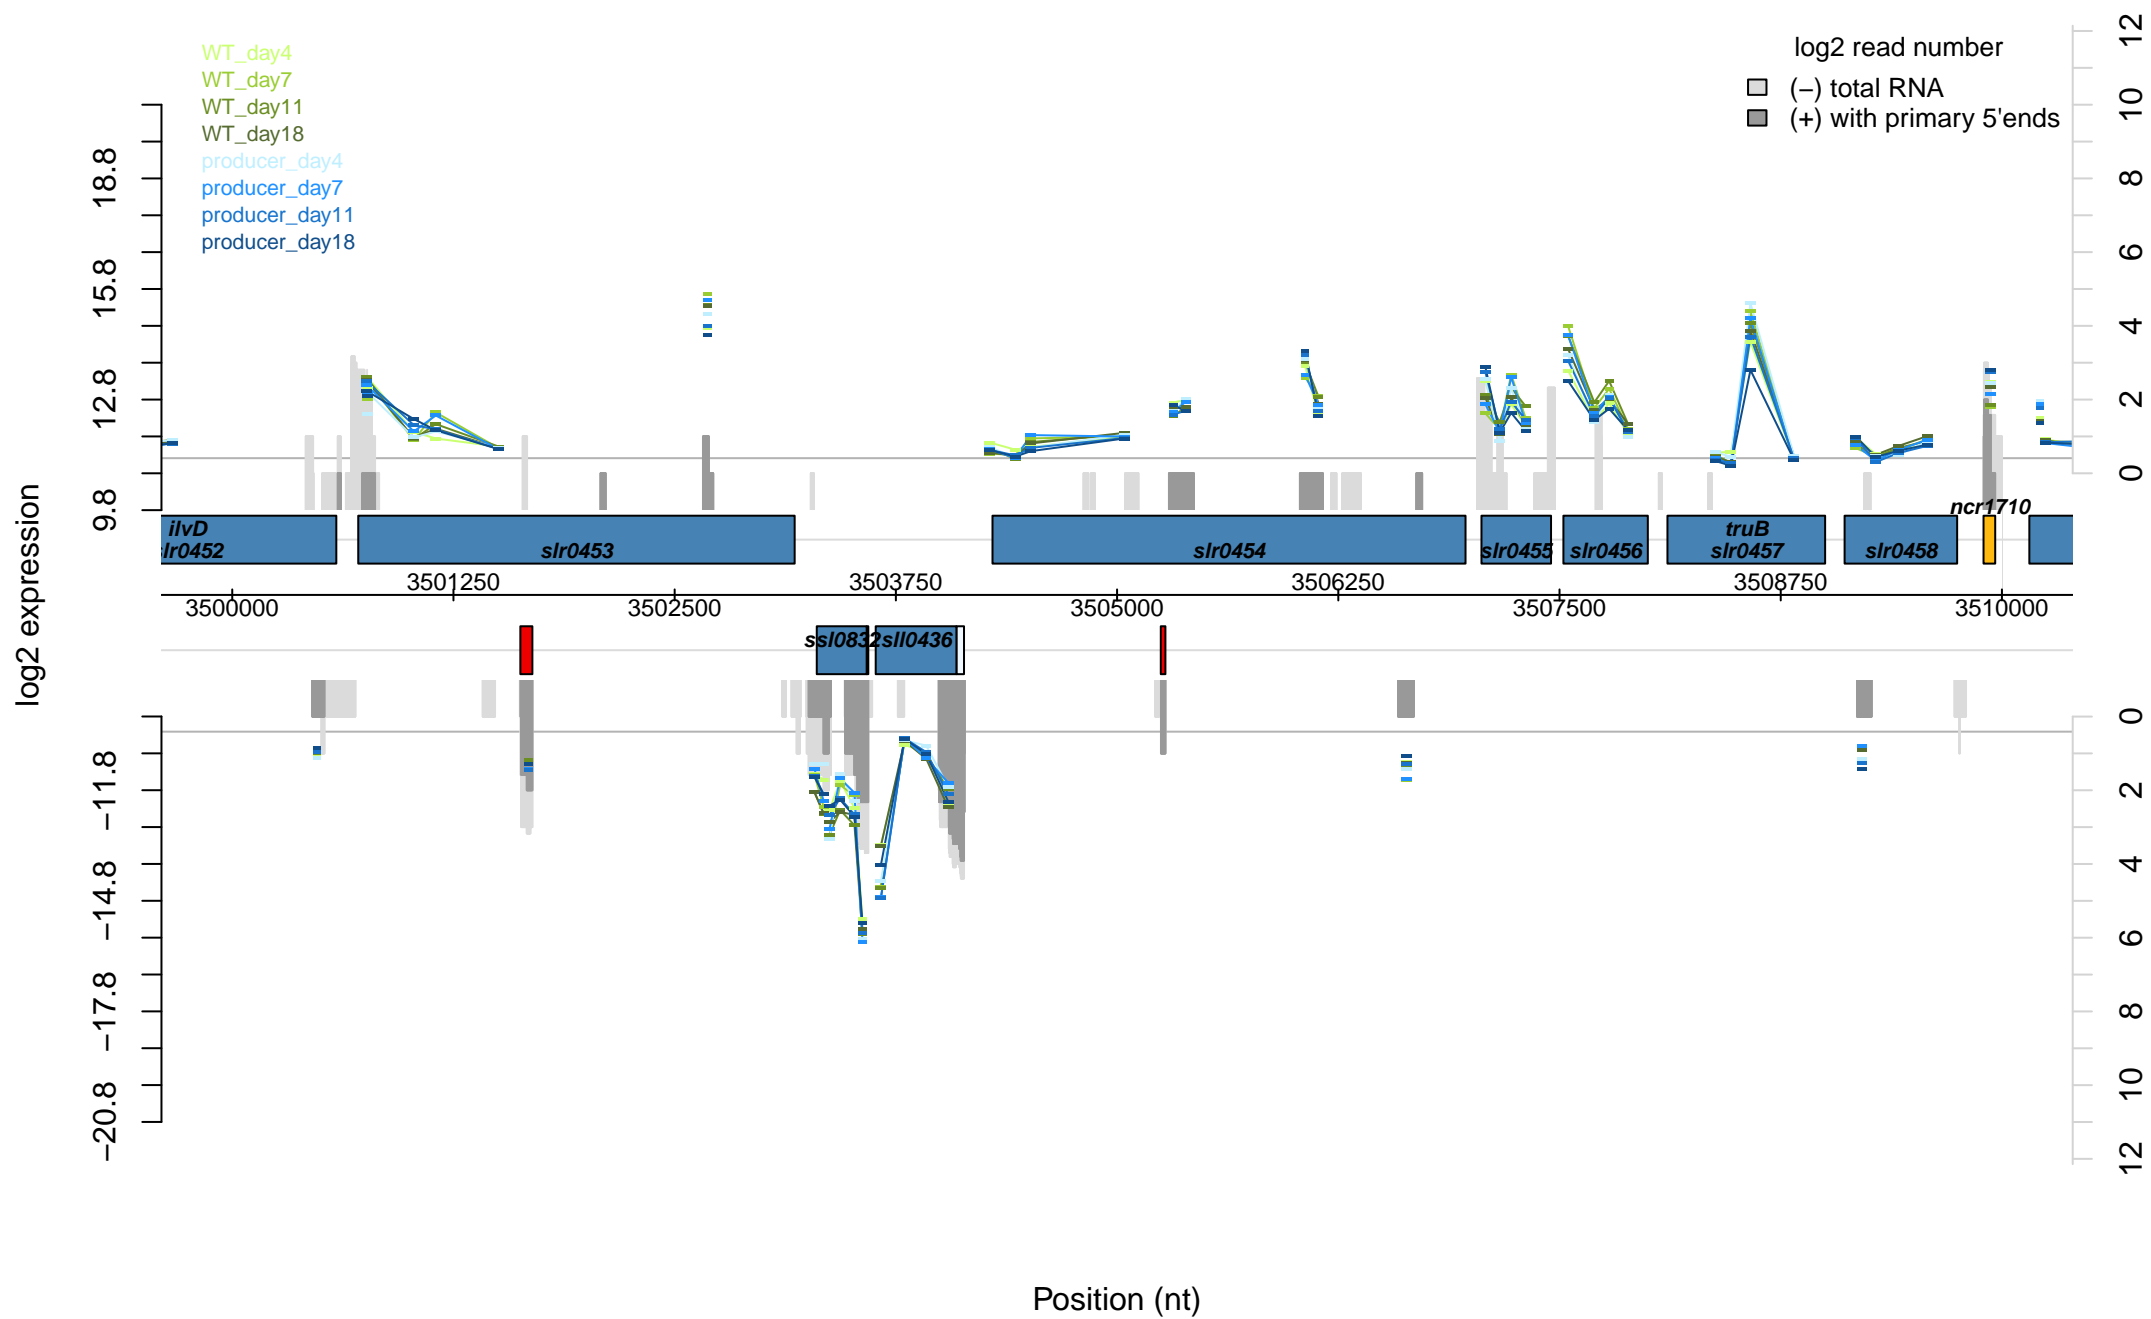

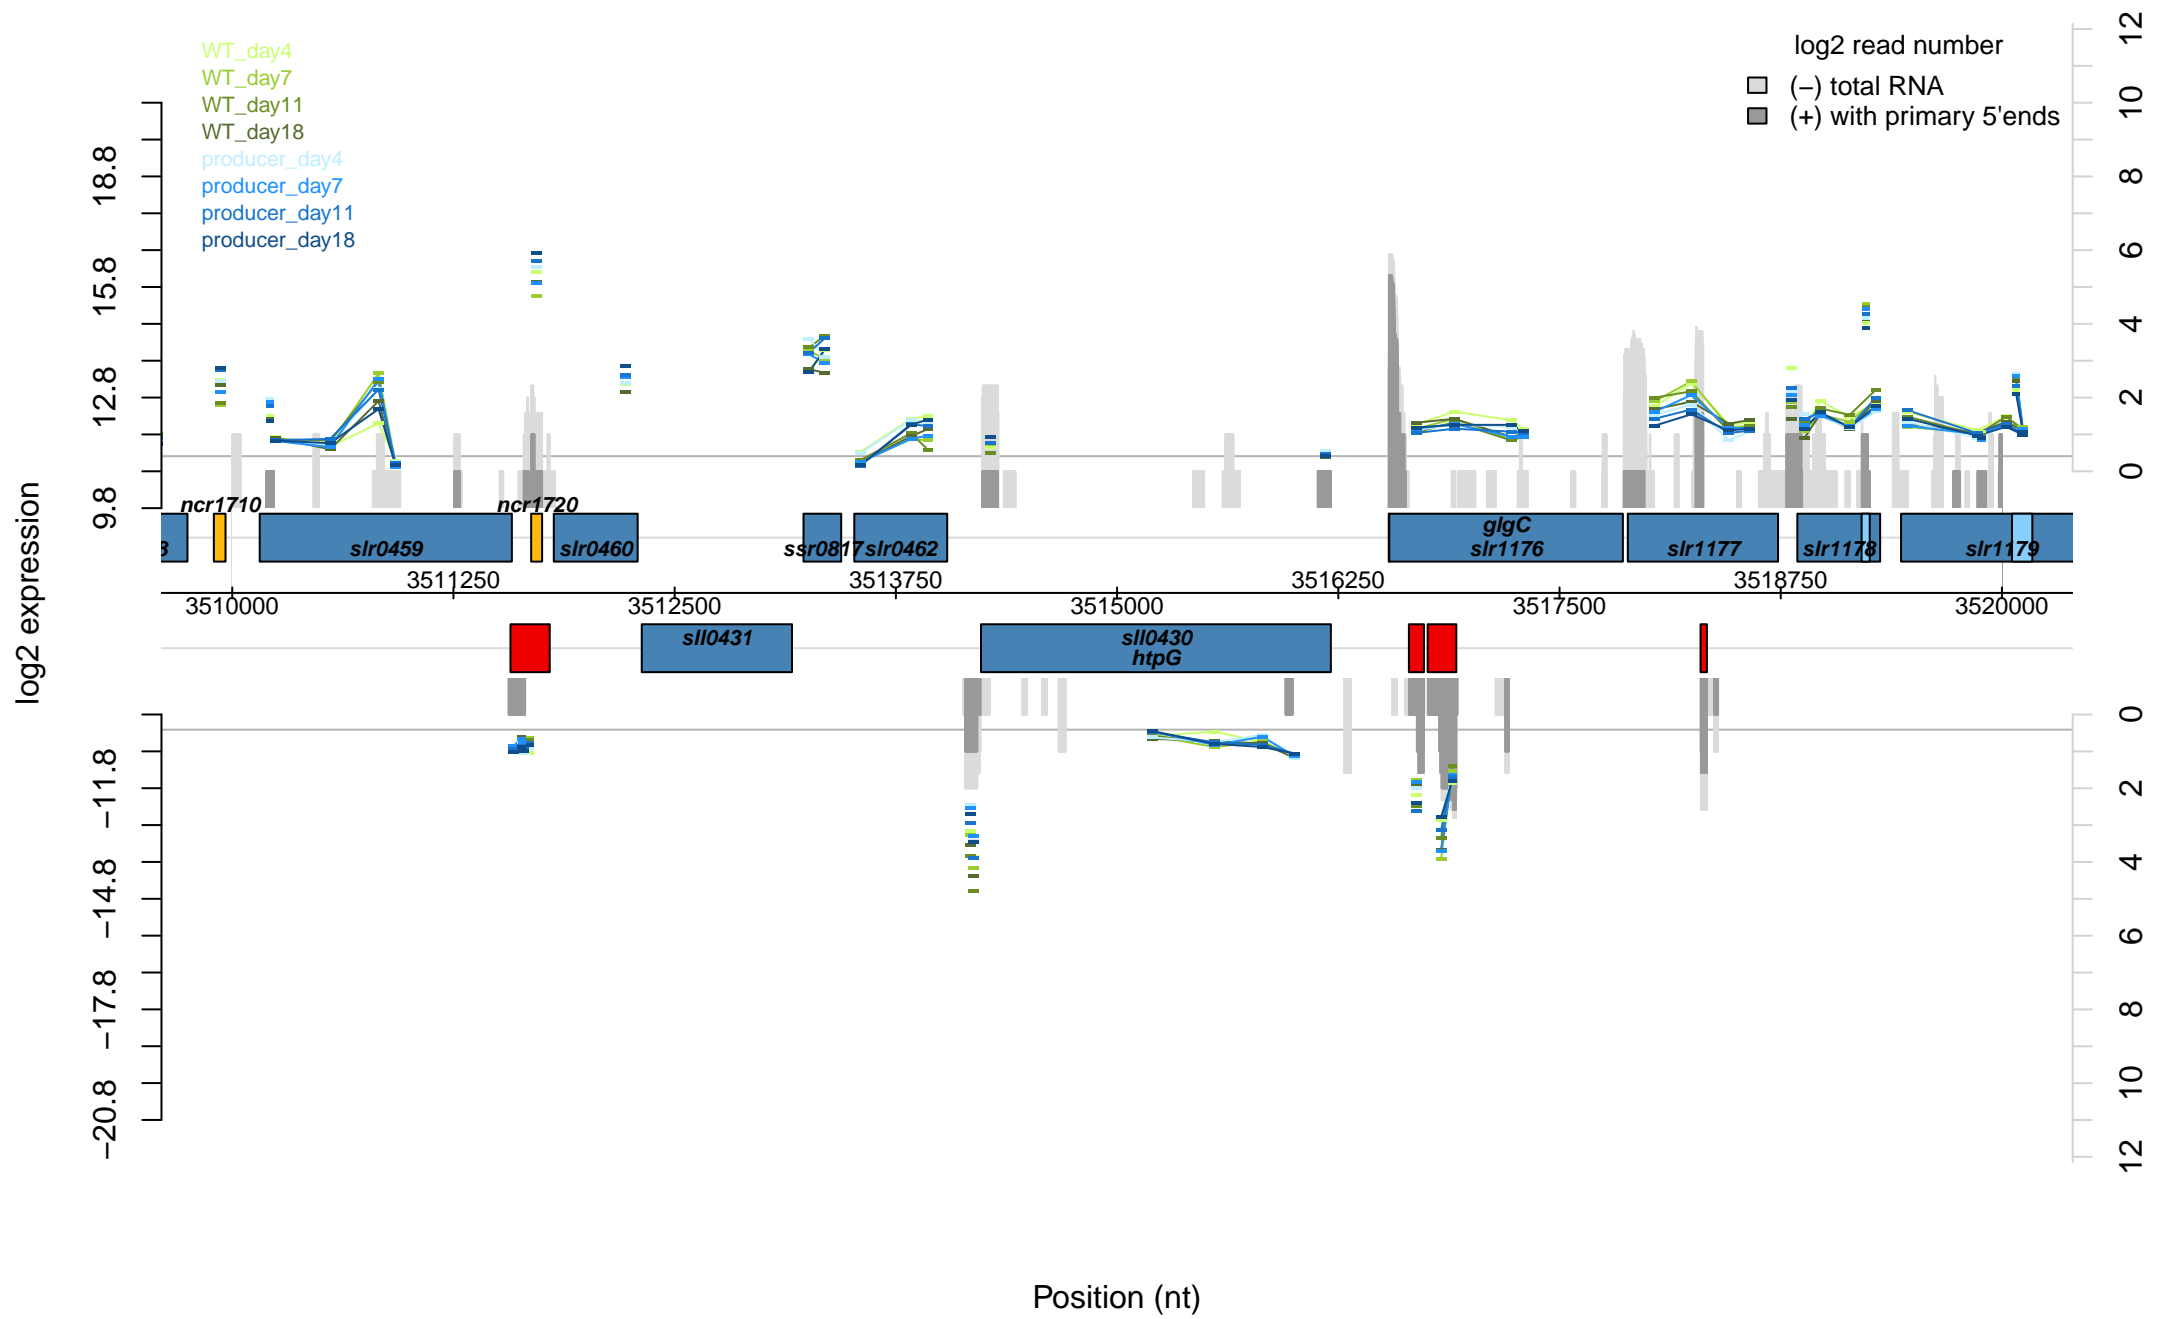

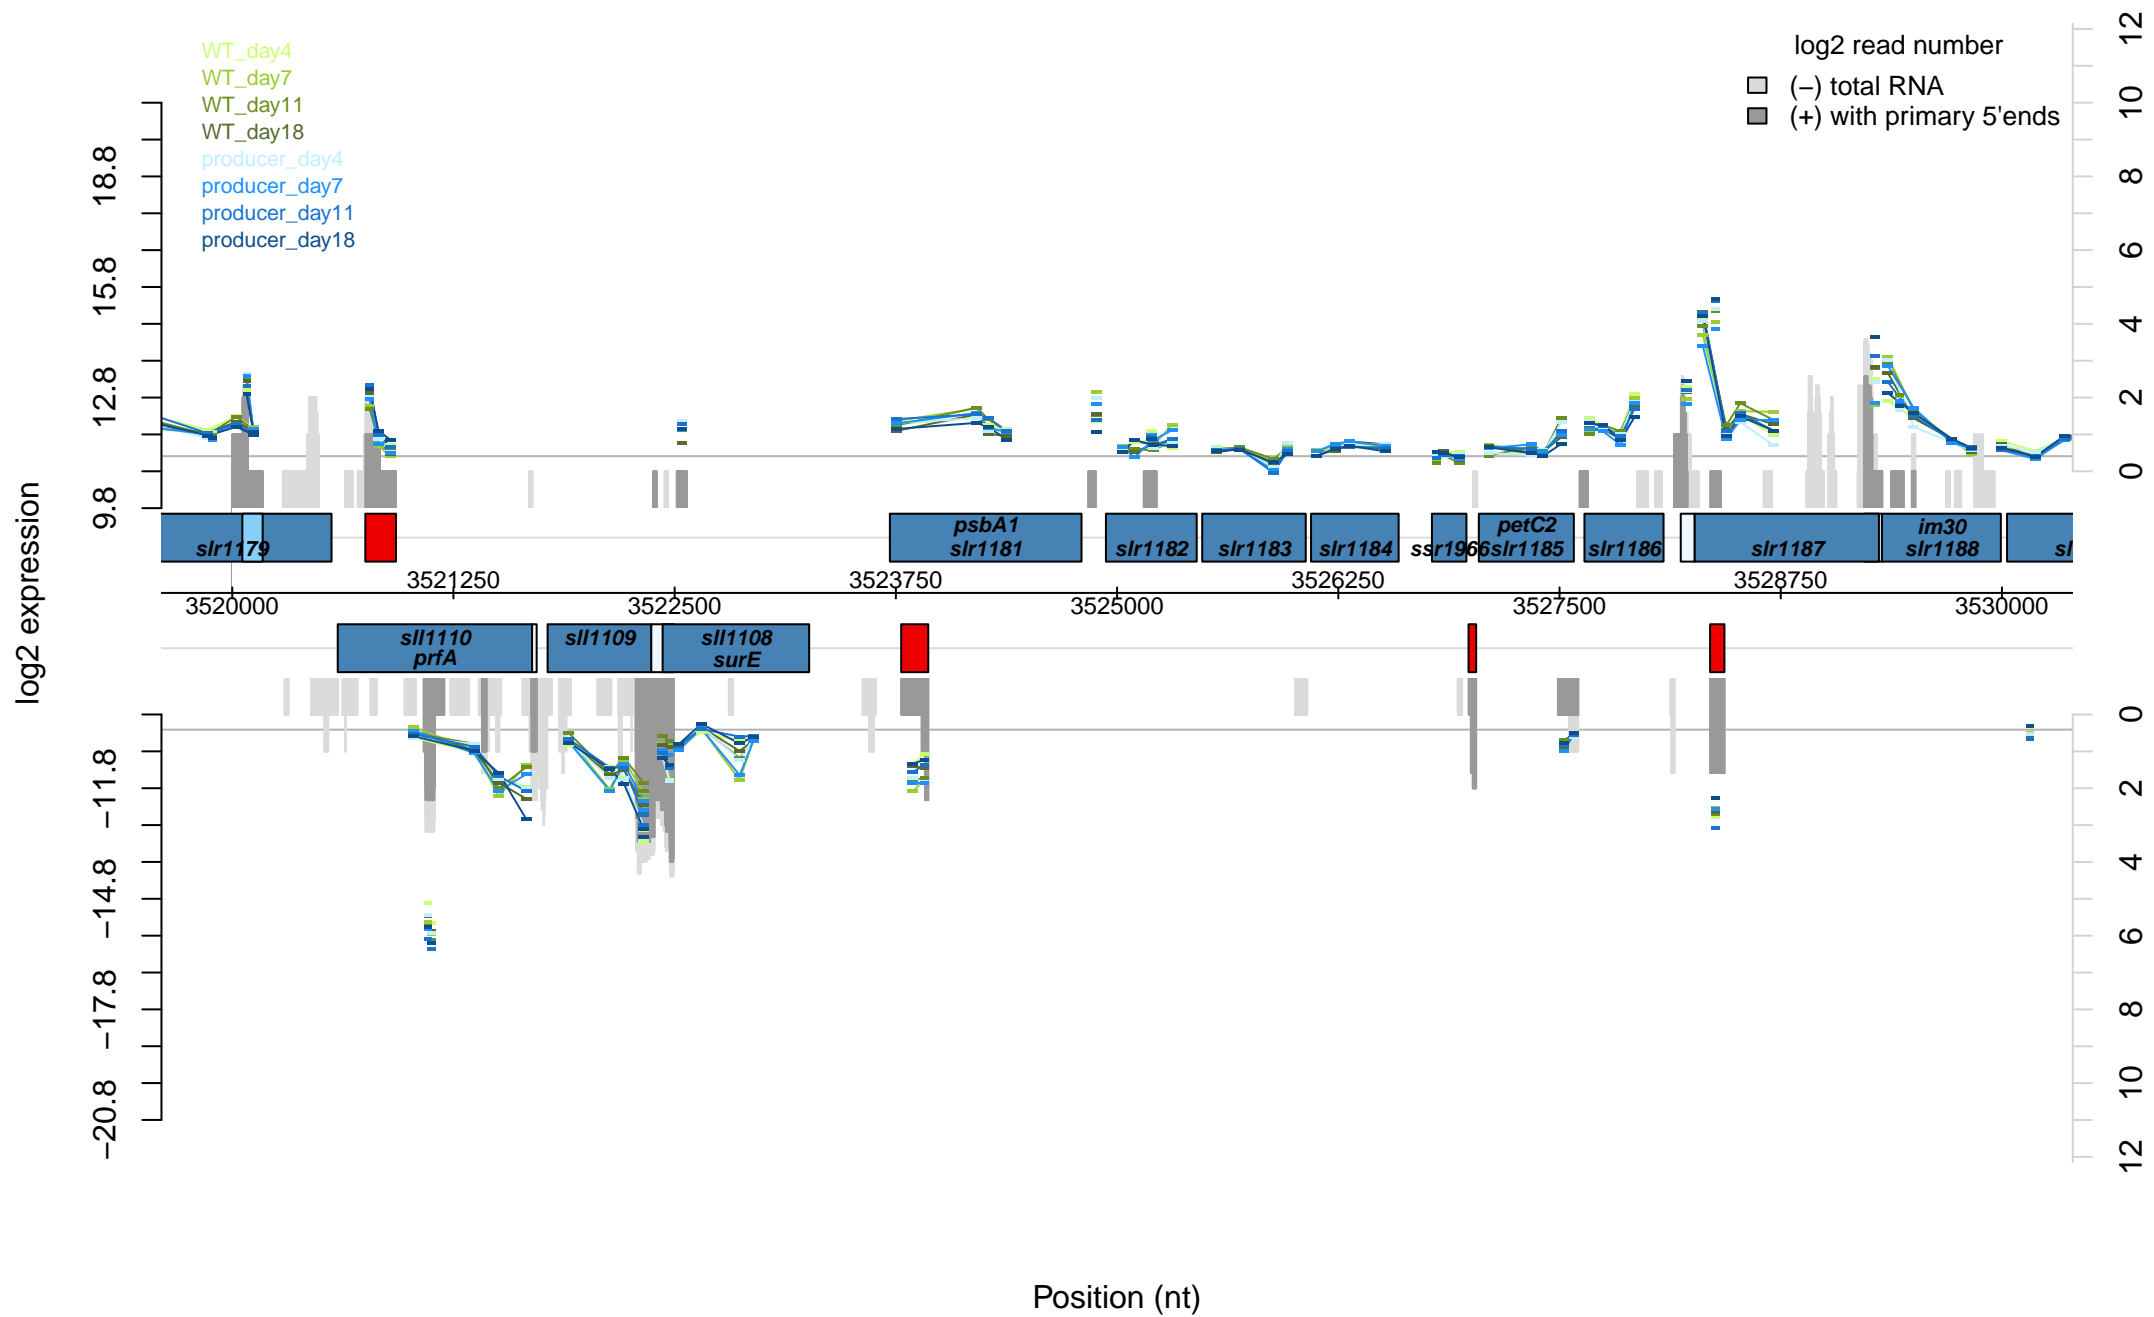

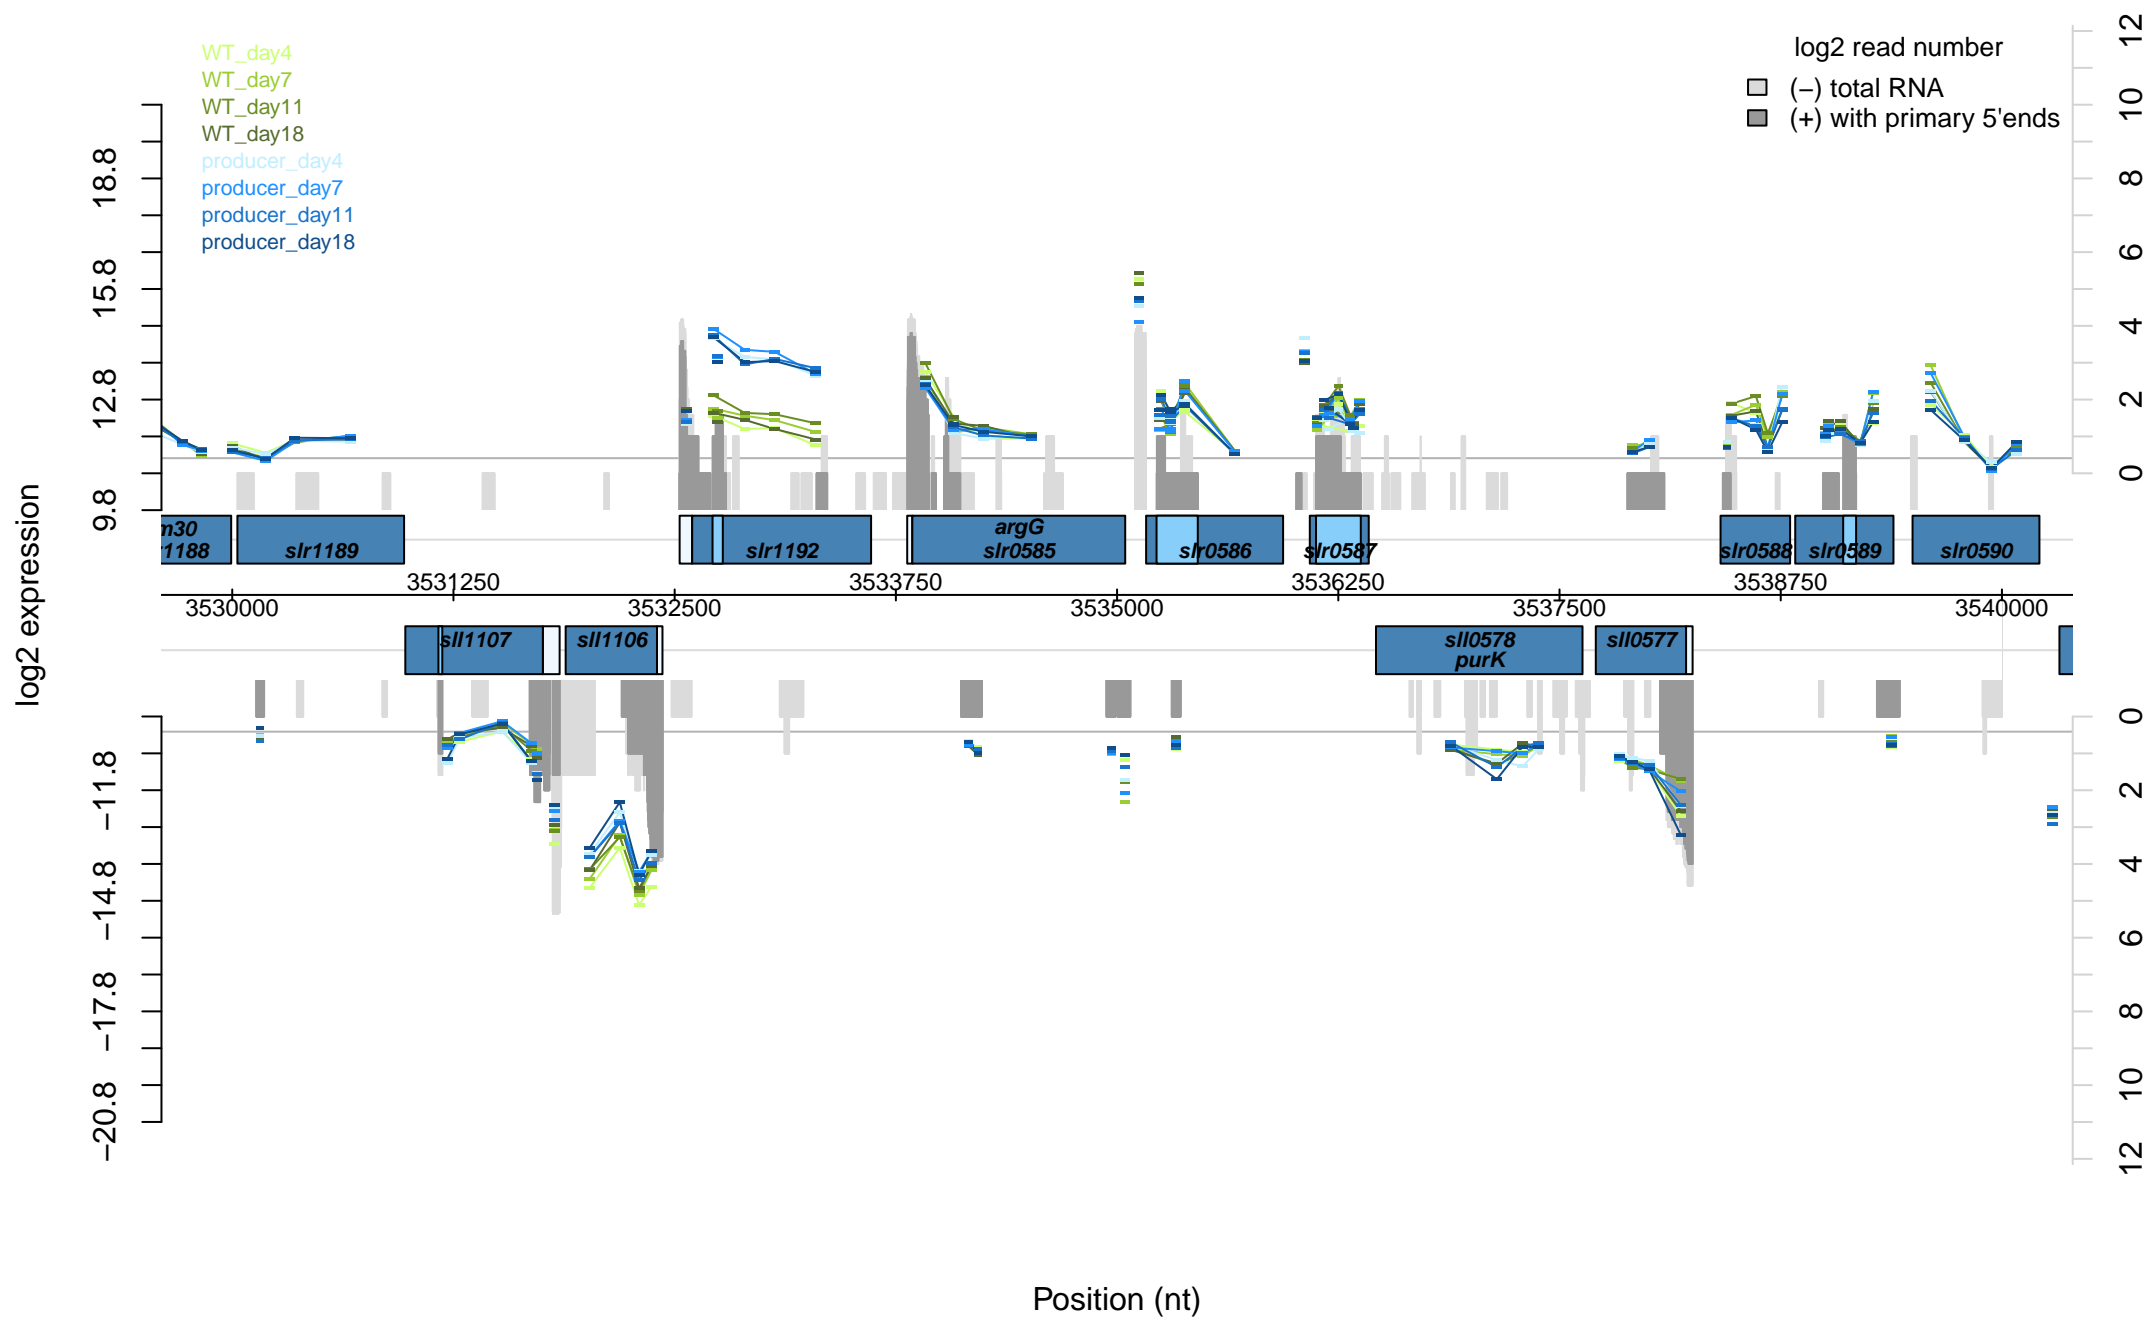



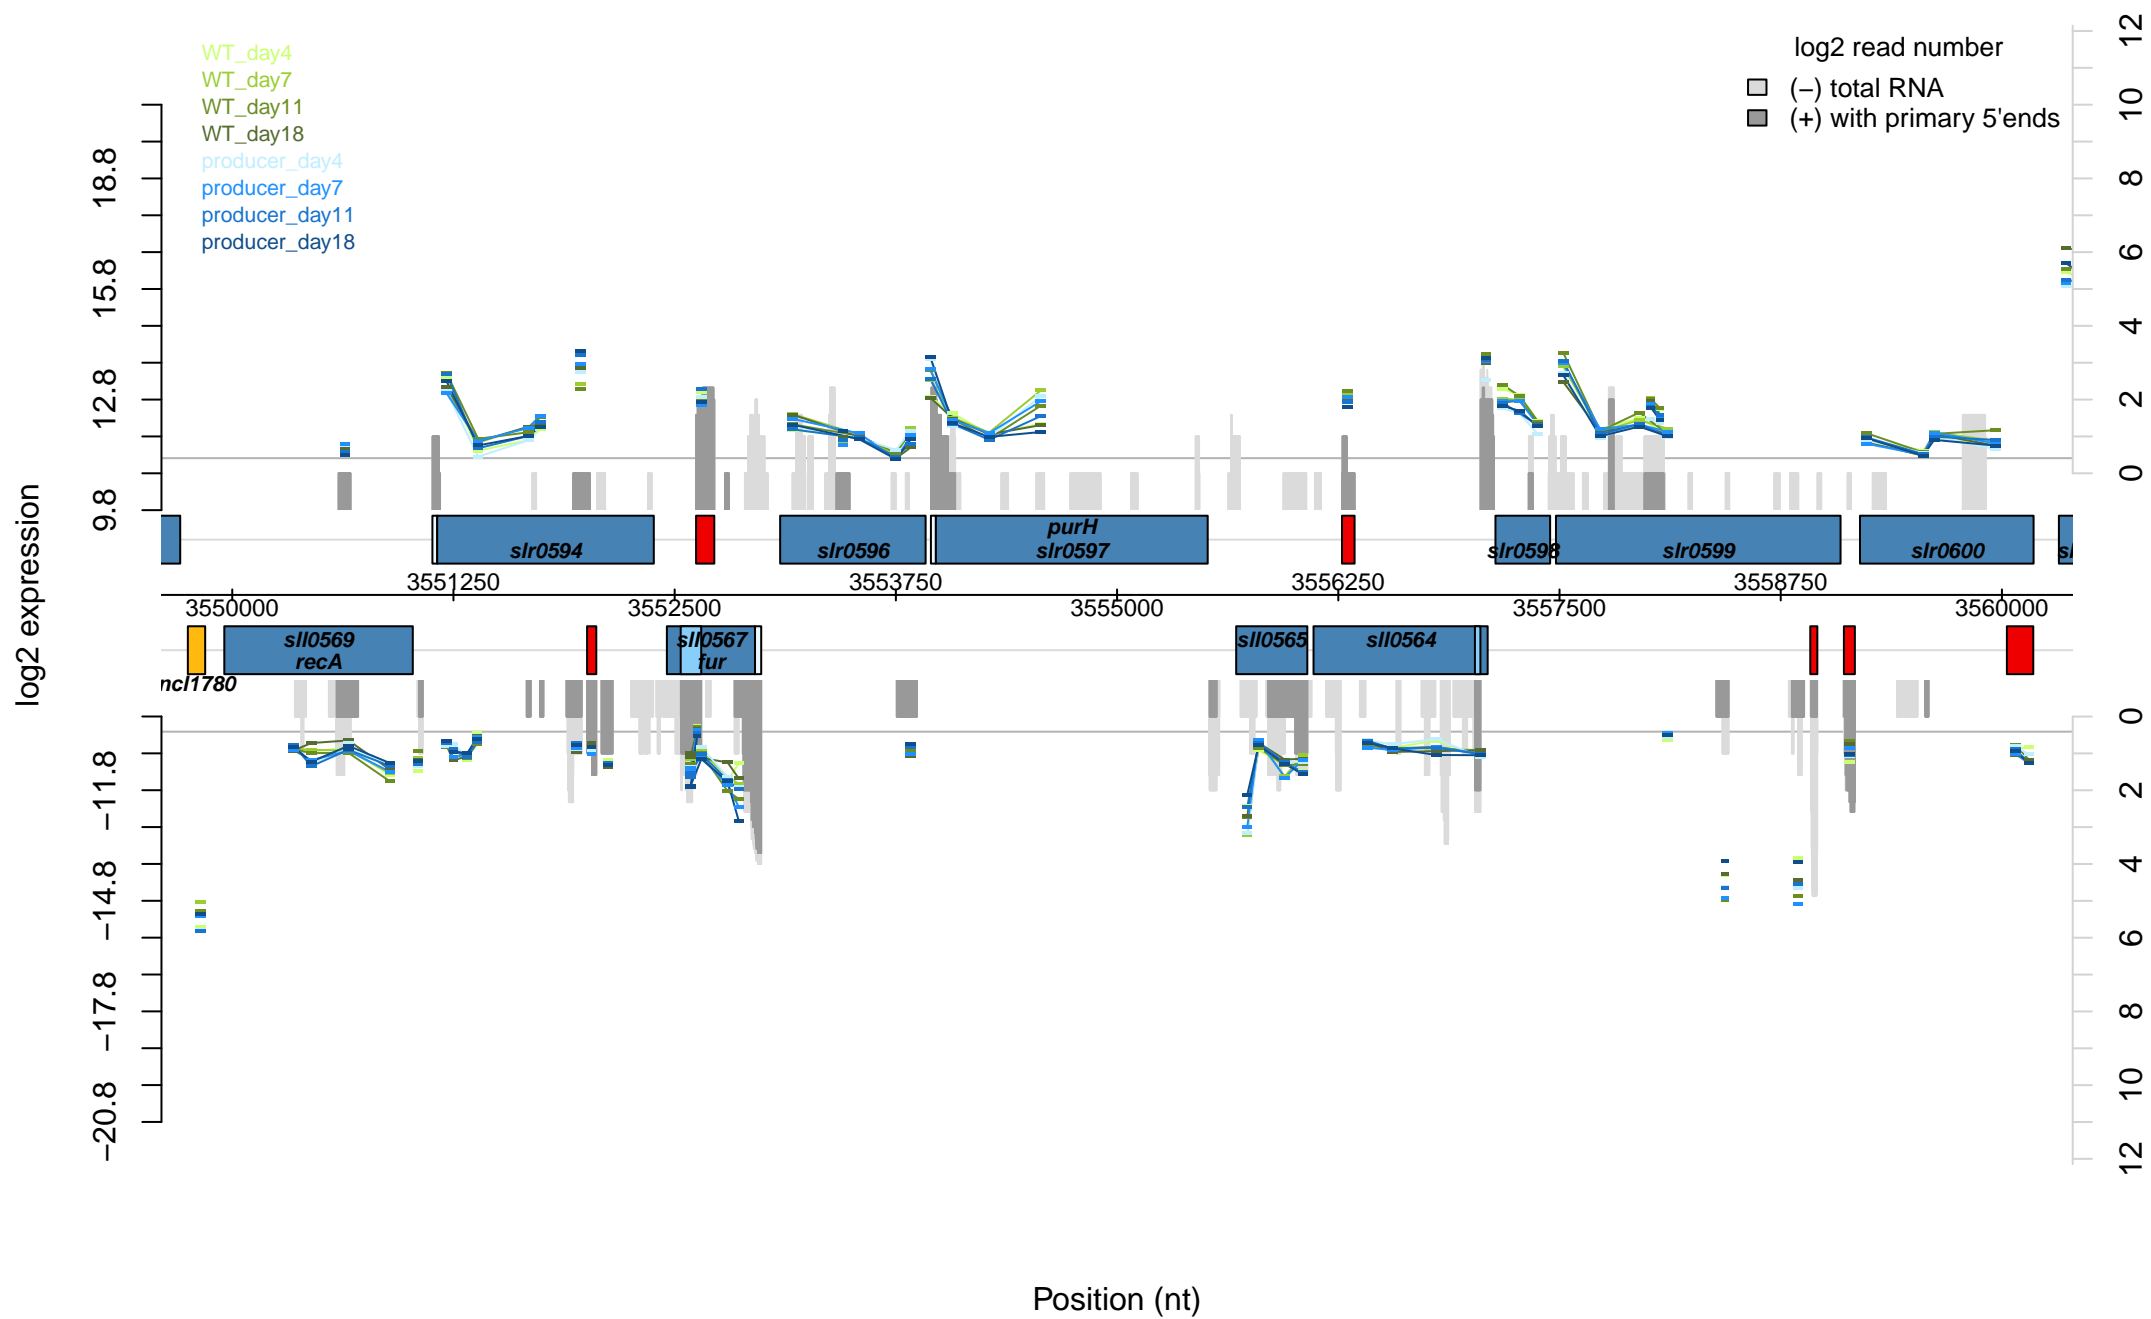





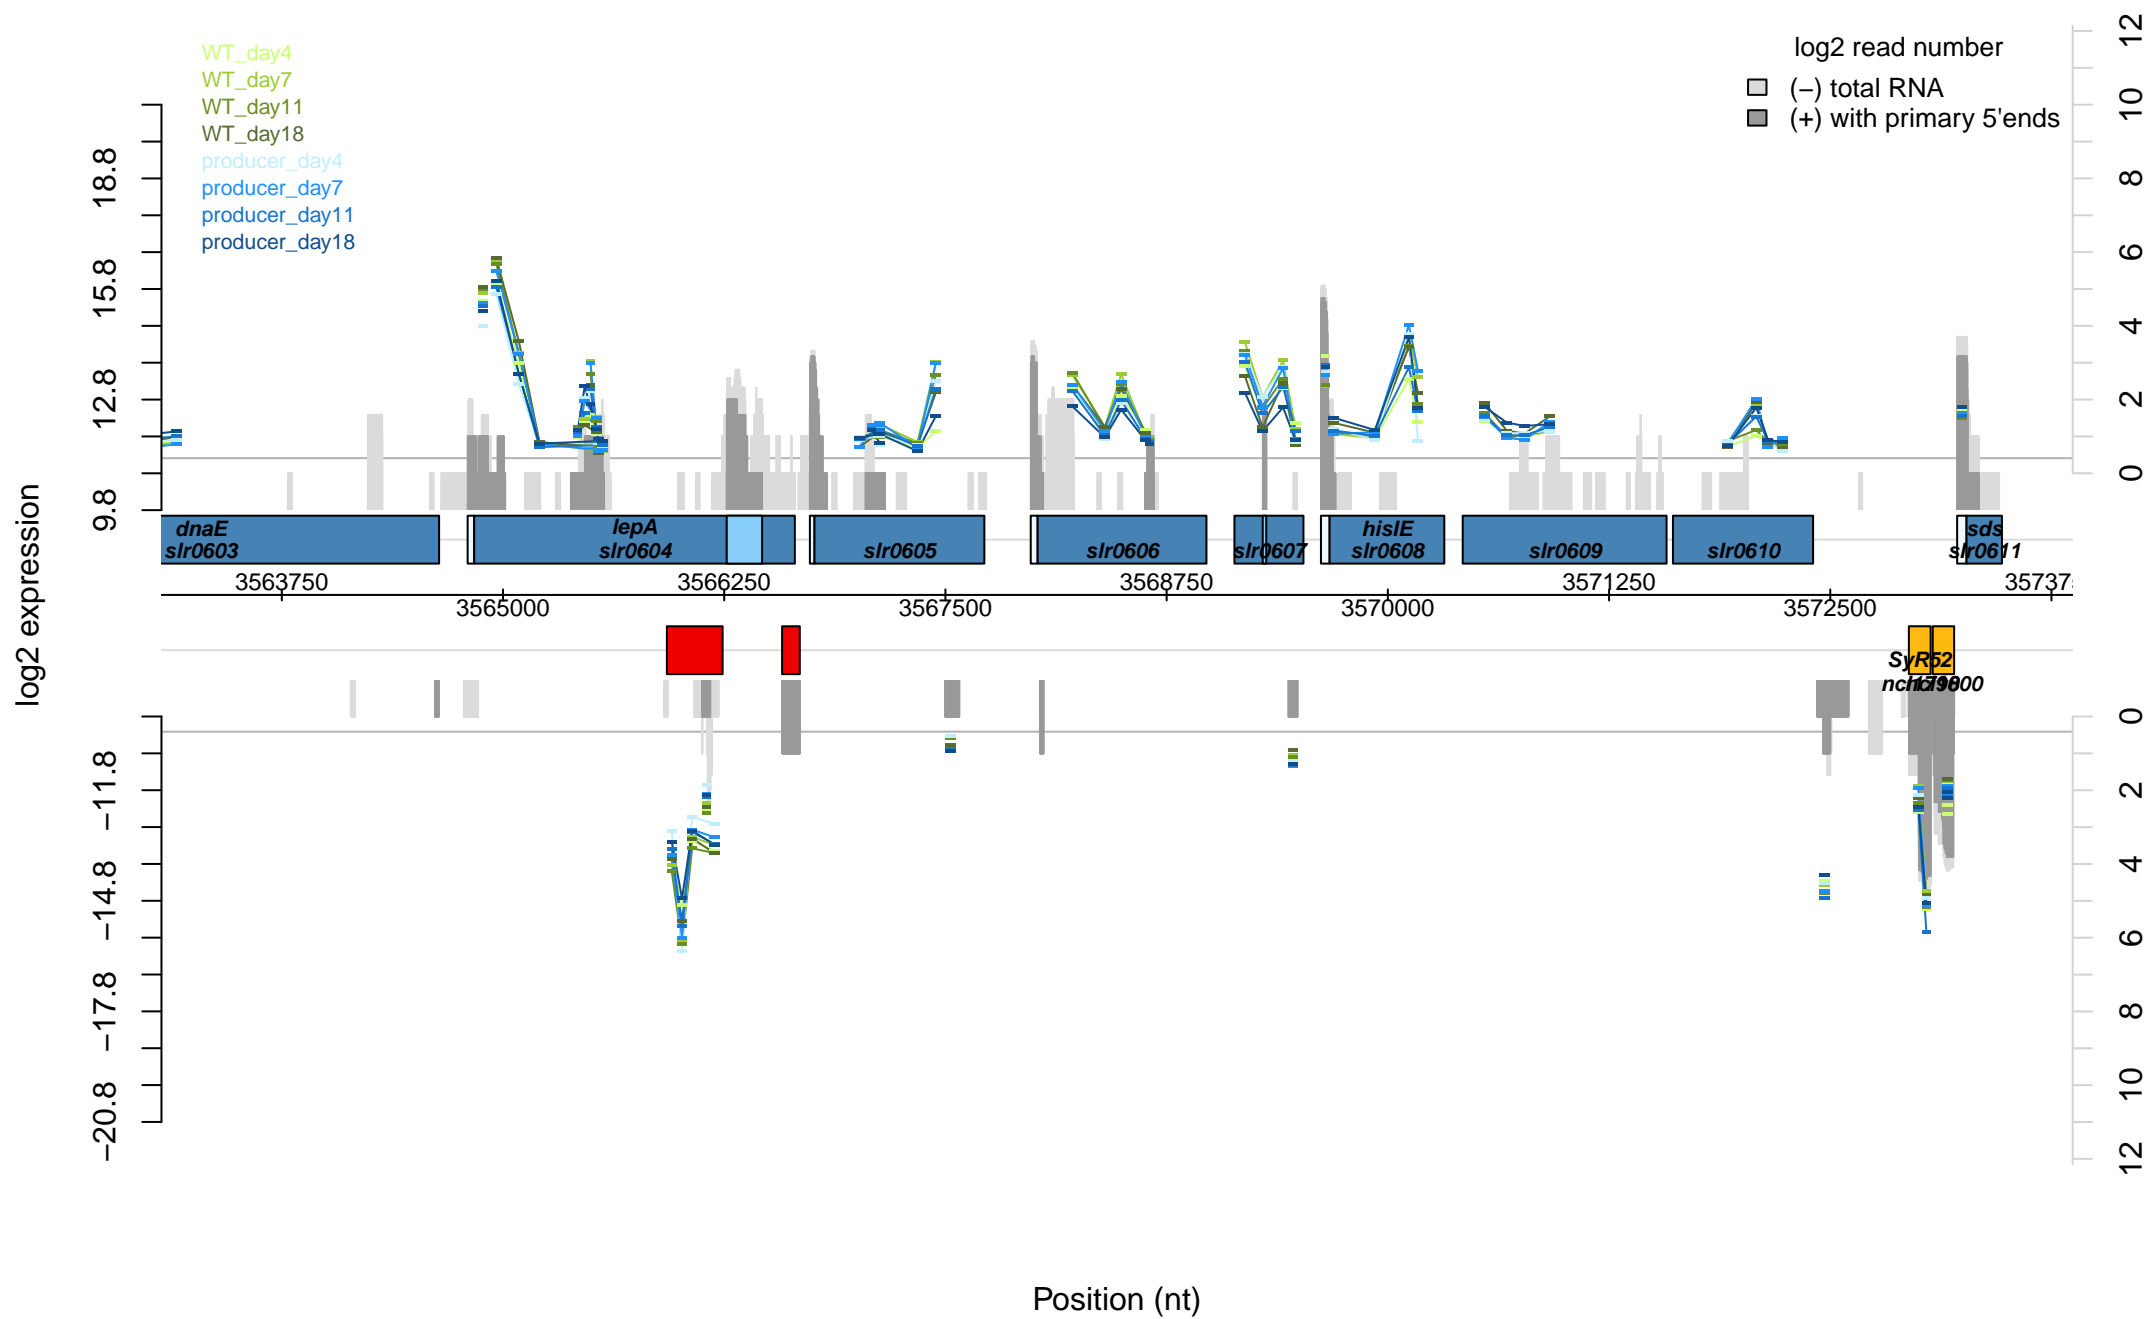

Supplement: 1754-6834-7-21-S1.pdf [file 1754-6834-7-21-S1.pdf]
