# Supplementary material for: Transcriptomic response to prolonged ethanol production in the cyanobacterium Synechocystis sp. PCC6803
Source: PubMed Central journal article supplement (PMC3925133; doi:10.1186/1754-6834-7-21), 2014-02-06
Supplement: 1754-6834-7-21-S2.pdf [file 1754-6834-7-21-S2.pdf]

## Additional File 2

## Additional Figures

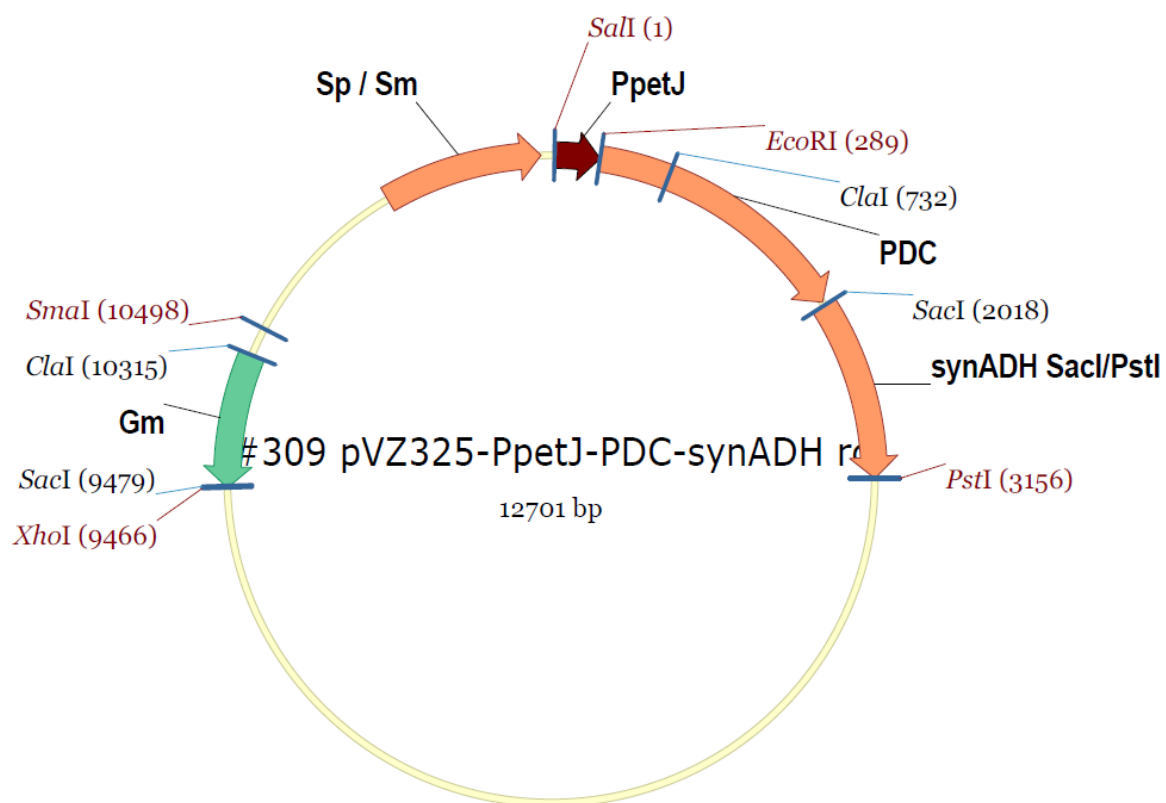

**Figure 1.** Ethanologenic plasmid pVZ325-PpetJ-PDC-synADH of producer strain #309.

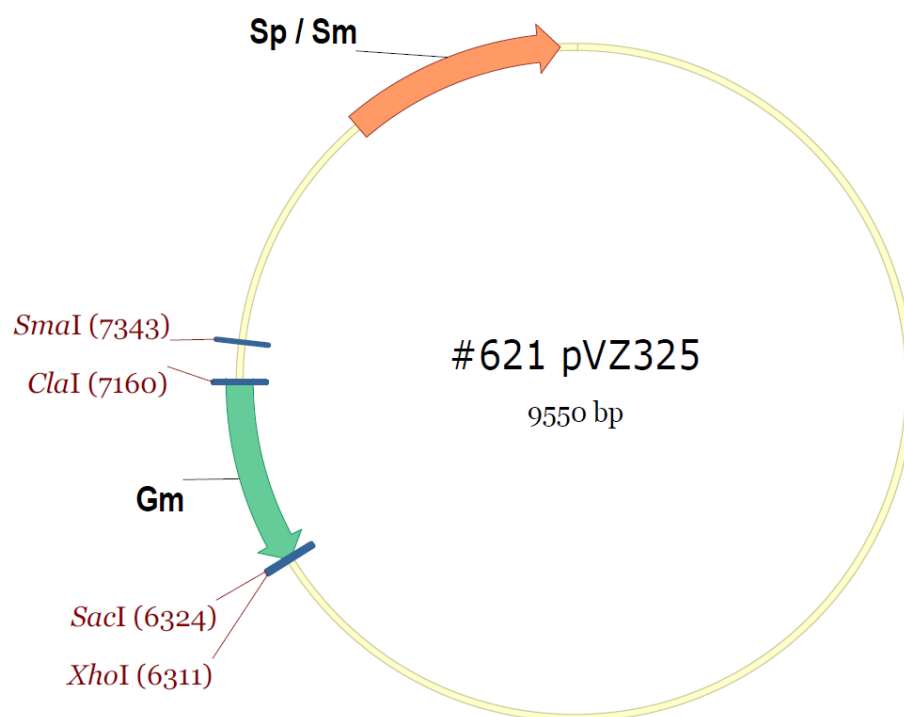

**Figure 2.** Non-ethanologenic empty-vector-control plasmid pVZ325 of isogenic control strain #621.
